# Supplementary material for: KLF10 integrates circadian timing and sugar signaling to coordinate hepatic metabolism
Source: eLife. 2021 Aug 17;10:e65574. doi: 10.7554/eLife.65574 (PMC8410083; doi:10.7554/eLife.65574)
Supplement: Figure 1—source data 1. [file elife-65574-fig1-data1.xlsx]

## Sheet: FigS2B
Slc16a5
Zeitgeber time		0	3	6	9	12	15	18	21	24
	WT	1	0.686152	2.90685	1.32979	2.82637	1.97916	14.814	3.70554
	WT	1.26289	0.910039	3.87622	2.06483	3.24993	7.20635	12.2908	12.8575
	WT	2.4675	0.188025		1.04411	6.21955	2.14048	2.60145	3.36889
	WT
	hepKO	3.43294	3.62194	4.39967	21.3939	11.225	34.5132	8.06534	7.29273
	hepKO	2.06882	9.41922	5.55083	16.2414	30.1993	18.8017	9.25979	6.39831
	hepKO	1.37195	6.58598	7.08545	5.55306	30.5913	14.8295	9.72521	5.59102
	hepKO
mean		1.5768	0.594739	3.39154	1.47958	4.09862	3.77533	9.90209	6.64396	1.5768
sem		0.451771	0.21338	0.484685	0.304025	1.06749	1.71614	3.72228	3.10827	0.451771
mean		2.29124	6.54238	5.67865	14.3962	24.0052	22.7148	9.01678	6.42735	2.29124
sem		0.605261	1.67367	0.777949	4.66502	6.3911	6.00961	0.494327	0.491455	0.605261
Bmal1
Zeitgeber time		0	3	6	9	12	15	18	21	24
	WT	3.01	4.59	1.04	0.09	0.22	2.08	3.74	6.17
	WT	5.23	3.53	7.09	0.13	0.27	0.63	3.51	6.67
	WT	5.07	7.85	0.87	0.12	0.53	1.91	5.48	4.99
	WT			5.22			0.69	4.26
	hepKO	2.22	2.68	0.29	0.08	0.59	1.87	4.09	4.61
	hepKO	0.4	4.82	0.55	0.1	0.99	1.89	3.82	4.93
	hepKO	0.82	2.28	1.97	0.16	0.5	2.8	4.42	8.75
	hepKO	8.42		0.63			2.91
mean		4.43667	5.32333	3.555	0.113333	0.34	1.3275	4.2475	5.94333	4.43667
sem		0.714827	1.29986	1.54927	0.0120185	0.0960902	0.387134	0.439761	0.498041	0.714827
mean		2.965	3.26	0.86	0.113333	0.693333	2.3675	4.11	6.09667	2.965
sem		1.85949	0.788501	0.37705	0.024037	0.150591	0.282382	0.173494	1.32988	1.85949
Pklr
Zeitgeber time		0	3	6	9	12	15	18	21	24
	WT	1	2.19753	2.05434	2.24483	2.30082	3.6912	1.07767	1.89302
	WT	0.812808	2.54372	0.941007	3.85475	6.75335	1.3601	4.26807	1.09037
	WT	1.37452		0.788156	2.93176	4.91117	2.1476	2.73814	1.49169
	WT
	hepKO	1.83262	2.86081	2.47303	7.24995	5.3262	5.11243	2.62965	3.23517
	hepKO	0.747316	1.96997	3.2213	1.65448	3.51573	2.81979	8.19238	4.55415
	hepKO	1.92082	2.25421	0.711492	3.48841	2.60727	2.91534	2.79338	5.35568
	hepKO	0.347716	0.981855	0.35896	0.548443	0.33651	0.296796	0.41857	0.0118977
mean		1.06244	2.37062	1.26117	3.01045	4.65512	2.39963	2.69462	1.49169	1.06244
sem		0.16513	0.173095	0.399033	0.466405	1.2917	0.684628	0.921246	0.231703	0.16513
mean		1.21212	2.01671	1.6912	3.23532	2.94643	2.78609	3.5085	3.28923	1.21212
sem		0.377327	0.262718	0.743941	1.64691	0.799155	0.748797	1.82757	0.618185	0.377327

## Sheet: FigS2C
Glycemia
	WT ZT6	hepKO ZT6	WT ZT18	hepKO ZT18
	109	86	111	104
	125	113	84	128
	84	105	133	109
	106	86	128	116
	94	126	120	105
	102	170	109	143
	97	134	127	144
	91	120	123	126
	102	102	118	97
	78	105	127	101
	118	166	119	127
	91	98	138	110
	99	162	89	101
	106	123	105	118
mean	100.143	121.143	116.5	116.357
sem	3.36246	7.49422	4.181	4.08778
	y	g
	109	WT ZT6
	125	WT ZT6
	84	WT ZT6
	106	WT ZT6
	94	WT ZT6
	102	WT ZT6
	97	WT ZT6
	91	WT ZT6
	102	WT ZT6
	78	WT ZT6
	118	WT ZT6
	91	WT ZT6
	99	WT ZT6
	106	WT ZT6
	86	hepKO ZT6
	113	hepKO ZT6
	105	hepKO ZT6
	86	hepKO ZT6
	126	hepKO ZT6
	170	hepKO ZT6
	134	hepKO ZT6
	120	hepKO ZT6
	102	hepKO ZT6
	105	hepKO ZT6
	166	hepKO ZT6
	98	hepKO ZT6
	162	hepKO ZT6
	123	hepKO ZT6
	111	WT ZT18
	84	WT ZT18
	133	WT ZT18
	128	WT ZT18
	120	WT ZT18
	109	WT ZT18
	127	WT ZT18
	123	WT ZT18
	118	WT ZT18
	127	WT ZT18
	119	WT ZT18
	138	WT ZT18
	89	WT ZT18
	105	WT ZT18
	104	hepKO ZT18
	128	hepKO ZT18
	109	hepKO ZT18
	116	hepKO ZT18
	105	hepKO ZT18
	143	hepKO ZT18
	144	hepKO ZT18
	126	hepKO ZT18
	97	hepKO ZT18
	101	hepKO ZT18
	127	hepKO ZT18
	110	hepKO ZT18
	101	hepKO ZT18
	118	hepKO ZT18
	p-value: 0.021686
		WT ZT18	WT ZT6	hepKO ZT18
	WT ZT6	0.03384
	hepKO ZT18	0.926308	0.03384
	hepKO ZT6	0.926308	0.03384	0.958389

## Sheet: FigS2D
Glycogen
	WT ZT3	hepKO ZT3	WT ZT15	hepKO ZT15
	839.049	911.585	333.853	332.203
	1236.21	946.561	188.93	515.585
	1082.31	767.879	242.973	303.507
	980.648	692.786	281.513	357.718
	989.379	668.783	132.011	360.939
			229.05	125.171
mean	1025.52	797.519	234.722	332.521
sem	65.4627	56.4114	28.7304	51.248
	y	g
	839.049	WT ZT3
	1236.21	WT ZT3
	1082.31	WT ZT3
	980.648	WT ZT3
	989.379	WT ZT3
	911.585	hepKO ZT3
	946.561	hepKO ZT3
	767.879	hepKO ZT3
	692.786	hepKO ZT3
	668.783	hepKO ZT3
	333.853	WT ZT15
	188.93	WT ZT15
	242.973	WT ZT15
	281.513	WT ZT15
	132.011	WT ZT15
	229.05	WT ZT15
	332.203	hepKO ZT15
	515.585	hepKO ZT15
	303.507	hepKO ZT15
	357.718	hepKO ZT15
	360.939	hepKO ZT15
	125.563	hepKO ZT15
	p-value: 0.000561
		WT ZT15	WT ZT3	hepKO ZT15
	WT ZT3	6.10824e-07
	hepKO ZT15	0.0593164	1e-05
	hepKO ZT3	1.8975e-05	0.039114	0.000873

## Sheet: FigS2E
Glucose uptake
Genotype	WT	hepKO
	32542.7	111531	32.5427	111.531
	23534.1	292622	23.5341	292.622
	59369.3	207181	59.3693	207.181
	76021.7	169402	76.0217	169.402
mean	47866.9	195184	47.8669	195.184
sem	12082.7	37969.8	12.0827	37.9698
	RLU	g
	32542.7	WT
	23534.1	WT
	59369.3	WT
	76021.7	WT
	111531	hepKO
	292622	hepKO
	207181	hepKO
	169402	hepKO
	Wilcoxon rank sum test
	p-value = 0.02857

## Sheet: FigS2F
Glucose production
Genotype	WT	hepKO
	7.50485	16.1941
	7.0974	18.1373
	8.50547	18.8868
	9.06608	15.6507
	14.4762	11.4235
	12.5385	10.1598
	9.86475	15.0754
	1.21281	1.44895
	geno	glu
	WT	7.50485
	WT	7.0974
	WT	8.50547
	WT	9.06608
	WT	14.4762
	WT	12.5385
	hepKO	16.1941
	hepKO	18.1373
	hepKO	18.8868
	hepKO	15.6507
	hepKO	11.4235
	hepKO	10.1598
	Wilcoxon rank sum test
	p-value = 0.02597
