# Supplementary material for: KLF10 integrates circadian timing and sugar signaling to coordinate hepatic metabolism
Source: eLife. 2021 Aug 17;10:e65574. doi: 10.7554/eLife.65574 (PMC8410083; doi:10.7554/eLife.65574)
Supplement: Figure 2—source data 1. — (.xlsx 9.65 MB). [file elife-65574-fig2-data1.xlsx]

## Sheet: RNAseq_WT
Figure 2 ̶ source data 1. Hepatic circadian transcriptome of WT and hepKO mice.
Gene	ARS_pvalue	ARS_BH.Q	ARS_period	ARS_adjphase	ARS_amplitude	JTK_pvalue	JTK_BH.Q	JTK_period	JTK_adjphase	JTK_amplitude	LS_pvalue	LS_BH.Q	LS_period	LS_adjphase	LS_amplitude	meta2d_pvalue	meta2d_BH.Q	meta2d_period	meta2d_phase	meta2d_Base	meta2d_AMP	meta2d_rAMP	ZT0	ZT3	ZT6	ZT9	ZT12	ZT15	ZT18	ZT21
Cdkn1a	1.18686e-06	0.0160831	24	22.4147	2.03006	0.0031746	0.18868	24	21	1.92168	0.11191	1	24	20.9999	5.54665	1.07768e-07	0.00146036	24	21.4691	2.34176	2.06356	0.881201	3.11244	2.15691	0.860069	0.347041	0.714927	2.1637	3.8979	5.4811
Gamt	6.33886e-05	0.0897558	24	10.7114	30.6105	0.000396825	0.173464	24	12	28.2296	0.0929506	1	24	11.7183	139.122	5.10549e-07	0.00183423	24	11.4777	107.595	31.3013	0.290916	73.6825	94.1592	109.121	134.681	138.457	126.759	99.1338	84.769
Caprin1	7.7635e-06	0.0526016	24	22.346	91.668	0.0031746	0.18868	24	0	87.5952	0.0974694	1	24	7.73643e-05	369.307	5.23197e-07	0.00183423	24	23.4526	261.659	91.4714	0.349582	364.631	309.721	235.309	169.587	173.995	229.452	291.651	318.925
Nek4	7.86332e-05	0.0897558	24	22.7669	3.03689	0.000396825	0.173464	24	0	2.92191	0.0921423	1	24	7.73643e-05	14.477	6.15476e-07	0.00183423	24	23.5906	11.4147	3.12793	0.274026	14.3661	12.9414	10.9659	8.79171	8.48976	9.32054	12.5783	13.864
Nedd4l	8.7472e-05	0.0911795	24	22.1924	20.2117	0.000396825	0.173464	24	22.5	19.7281	0.0920147	1	24	20.9999	60.753	6.76788e-07	0.00183423	24	21.8993	41.8509	20.4789	0.48933	58.6991	48.3763	30.8818	20.3019	25.231	36.7495	55.5381	59.0293
Prpf31	0.000108967	0.105473	24	22.5111	1.69997	0.000396825	0.173464	24	0	1.49454	0.100588	1	24	7.73643e-05	14.1805	8.94244e-07	0.00186315	24	23.5066	12.1596	1.71839	0.141319	14.1989	12.8387	11.9603	10.7294	10.3069	11.2512	12.7995	13.1923
Avpr1a	1.59319e-05	0.0715001	24	22.4228	16.8871	0.0031746	0.18868	24	0	16.3447	0.0933034	1	24	20.9999	38.1777	9.62441e-07	0.00186315	24	22.4729	23.3475	16.8863	0.723257	41.0148	32.0198	14.4868	8.93631	8.3706	16.777	27.4788	37.696
Tardbp	0.000156417	0.126433	24	22.6363	13.2684	0.000396825	0.173464	24	0	12.8607	0.0965489	1	24	7.73643e-05	71.7416	1.19351e-06	0.00202165	24	23.5476	57.5112	13.5384	0.235404	71.226	63.7828	52.1685	49.222	42.8658	50.1645	62.1729	68.4869
Tjp3	3.18284e-05	0.0862614	24	22.5445	13.7406	0.0031746	0.18868	24	0	12.9815	0.0941392	1	24	7.73643e-05	37.3437	1.80781e-06	0.00272196	24	23.5175	22.3195	13.9248	0.623885	36.6676	29.298	19.4322	8.50251	10.5154	14.2804	27.6447	32.2149
Map7d1	0.000280874	0.158171	24	22.3271	3.75524	0.000396825	0.173464	24	22.5	3.20482	0.0985785	1	24	20.9999	24.7515	2.05746e-06	0.00278807	24	21.9447	21.2016	3.78815	0.178673	24.2436	21.9799	20.1579	17.2075	17.2774	20.605	23.6915	24.45
Elovl3	5.02718e-05	0.0897558	24	22.5221	278.877	0.0031746	0.18868	24	0	260.84	0.0937469	1	24	7.73643e-05	562.022	2.71306e-06	0.00334225	24	23.5101	264.935	282.134	1.06492	550.027	359.792	134.493	31.2048	43.3722	109.55	353.437	537.605
Pnrc1	7.94827e-05	0.0897558	24	22.3396	22.9742	0.0031746	0.18868	24	22.5	22.6494	0.0944118	1	24	20.9999	69.4225	4.11177e-06	0.00451252	24	21.9489	44.4001	23.1655	0.521744	62.5961	49.0439	31.5269	24.2929	23.7415	35.5845	61.6476	66.7674
Bckdha	0.000594126	0.191691	24	10.5198	33.9699	0.000396825	0.173464	24	12	30.9997	0.107046	1	24	11.5509	198.948	4.32903e-06	0.00451252	24	11.3581	165.038	34.2607	0.207593	128.202	145.899	179.029	187.865	200.686	187.842	146.766	144.013
Tubb2b	2.11055e-05	0.0715001	24	22.3668	3.02743	0.0138889	0.278415	24	0	2.84072	0.0935787	1	24	20.9999	6.23275	4.66307e-06	0.00451352	24	22.4532	3.75156	3.02695	0.806853	6.67503	5.36659	2.52645	0.520562	1.19154	2.79616	4.81017	6.12594
P2ry2	0.00109396	0.244534	24	10.316	3.53634	0.000396825	0.173464	24	10.5	3.02085	0.108614	1	24	9.69545	12.2557	7.55193e-06	0.00666573	24	10.1708	8.36233	3.55089	0.42463	5.50465	6.90724	9.16511	12.8694	11.7367	8.48835	6.77294	5.45424
Sgpl1	0.000158613	0.126433	24	22.6511	23.9995	0.0031746	0.18868	24	22.5	22.4917	0.0992148	1	24	7.73643e-05	108.733	7.95006e-06	0.00666573	24	23.048	90.7375	24.1917	0.266612	107.135	101.914	85.8725	64.781	67.1138	82.3869	103.502	113.196
Ncstn	0.000180735	0.129536	24	10.1817	3.39167	0.0031746	0.18868	24	10.5	3.09604	0.0939779	1	24	9.38565	36.4253	8.50757e-06	0.00666573	24	10.023	33.2643	3.42328	0.102911	29.9412	32.9955	35.451	36.179	36.2527	33.7869	31.819	29.6893
Mical2	0.000181624	0.129536	24	22.596	10.8696	0.0031746	0.18868	24	22.5	10.1075	0.100632	1	24	20.9999	35.408	9.07946e-06	0.00666573	24	22.0351	22.7167	10.8567	0.477919	30.7128	27.9114	16.3144	12.3489	14.8943	17.8422	26.5389	35.1704
Clpx	4.65096e-05	0.0897558	24	22.7613	109.157	0.0138889	0.278415	24	0	104.279	0.0928026	1	24	7.73643e-05	250.941	9.34609e-06	0.00666573	24	23.5888	153.399	112.384	0.732627	242.963	210.067	123.259	51.391	59.041	87.0139	195.31	258.149
Adhfe1	0.00020687	0.140165	24	10.7433	8.81264	0.0031746	0.18868	24	12	8.23039	0.0992506	1	24	11.2468	82.2168	1.00661e-05	0.00682026	24	11.3297	73.5403	8.98024	0.122113	66.8918	68.8156	77.3524	79.7327	83.2294	77.8931	69.3328	65.0747
Cd99l2	0.00156726	0.268752	24	10.4662	1.91089	0.000396825	0.173464	24	12	1.59377	0.122961	1	24	11.4276	27.026	1.15965e-05	0.00748308	24	11.2988	25.443	1.91947	0.0754419	22.5974	24.8815	26.044	26.8957	26.9885	26.5968	25.6543	23.8858
Isg20	0.000296838	0.158171	24	22.3799	0.338279	0.0031746	0.18868	24	22.5	0.286725	0.0997501	1	24	20.9999	1.46261	1.3919e-05	0.00775257	24	21.9625	1.11658	0.340619	0.305056	1.44047	1.23252	0.9407	0.780843	0.834081	1.0652	1.16108	1.47775
Pnkd	0.000300194	0.158171	24	22.3989	15.1065	0.0031746	0.18868	24	22.5	14.4266	0.100327	1	24	20.9999	49.9995	1.41298e-05	0.00775257	24	21.9688	36.7286	15.2007	0.413867	48.9759	46.6303	28.7585	20.4176	24.7543	31.5567	43.5127	49.2225
Pid1	7.19975e-05	0.0897558	24	22.5727	25.9215	0.0138889	0.278415	24	0	24.1287	0.0965077	1	24	7.73643e-05	111.522	1.42464e-05	0.00775257	24	23.5267	83.1826	26.3246	0.316468	108.974	101.785	75.3366	58.8813	58.9815	68.4727	93.0796	99.9495
Lgalsl	0.000315152	0.158171	24	22.1085	13.9286	0.0031746	0.18868	24	22.5	13.7758	0.0968885	1	24	20.9999	33.2778	1.43026e-05	0.00775257	24	21.871	21.0483	14.1489	0.672211	33.2723	26.6275	12.2829	5.69726	10.992	17.2763	30.0774	32.1612
Acnat1	0.000343694	0.166336	24	22.1844	20.0505	0.0031746	0.18868	24	22.5	18.3662	0.102403	1	24	20.9999	67.6838	1.62146e-05	0.00845094	24	21.8966	49.9078	20.3206	0.407164	73.6054	52.9726	39.8857	32.1881	34.525	40.0783	60.0995	65.9076
Ube2u	0.000392969	0.170943	24	22.8631	0.806568	0.0031746	0.18868	24	0	0.717064	0.0980063	1	24	7.73643e-05	2.39227	1.75565e-05	0.0088114	24	23.6223	1.69765	0.836307	0.492625	2.36648	2.13123	1.69326	0.954363	0.744715	1.36479	1.93513	2.39127
Rabep1	0.000415626	0.170943	24	22.3622	12.7781	0.0031746	0.18868	24	0	11.4569	0.102191	1	24	7.73643e-05	84.2941	1.9139e-05	0.00926261	24	23.4579	71.2269	12.7673	0.179248	84.7561	72.6415	68.2142	59.72	58.4751	65.6432	79.0085	81.3568
Ppp1r3c	0.000440956	0.170943	24	22.1887	81.4037	0.0031746	0.18868	24	22.5	68.9835	0.103309	1	24	20.9999	179.48	2.03575e-05	0.00949751	24	21.898	103.098	82.4894	0.800106	200.675	113.674	61.0918	27.5898	40.0359	80.8889	121.001	179.829
Epha1	0.00367508	0.304485	24	9.81998	4.35229	0.000396825	0.173464	24	9	4.3538	0.10287	1	24	8.90115	33.1137	2.10261e-05	0.00949751	24	9.23983	27.6556	4.61732	0.166958	25.9156	26.987	31.5538	33.4316	30.8312	26.1308	23.6915	22.7036
Zc3h12a	0.00358261	0.304485	24	10.2074	0.548674	0.000396825	0.173464	24	10.5	0.431306	0.120173	1	24	9.42962	3.29881	2.35749e-05	0.0103053	24	10.0462	2.7236	0.55324	0.203128	2.25073	2.72181	2.8221	3.49933	3.1278	2.72959	2.48802	2.14945
Pdk4	0.000568995	0.18806	24	22.5801	7.31896	0.0031746	0.18868	24	22.5	7.12318	0.115023	1	24	20.9999	18.0104	2.8e-05	0.0112344	24	22.0298	8.80048	7.31487	0.83119	12.3212	11.6832	4.24659	2.14009	2.68098	5.25945	15.0111	17.0613
Tubb2a	0.000629664	0.193922	24	22.4584	63.2159	0.0031746	0.18868	24	22.5	54.3761	0.104991	1	24	20.9999	139.07	2.82484e-05	0.0112344	24	21.9889	82.3397	63.4737	0.770876	135.558	116.627	61.5218	8.79171	24.1884	76.961	93.7431	141.327
Mreg	0.000151863	0.126433	24	22.5009	20.3679	0.0138889	0.278415	24	0	19.168	0.100469	1	24	7.73643e-05	65.935	2.84892e-05	0.0112344	24	23.5032	43.939	20.5726	0.468208	64.0365	58.1338	39.59	21.372	25.4693	35.2183	50.8662	56.8262
Dtx4	0.00061726	0.193922	24	23.029	9.85603	0.0031746	0.18868	24	0	9.29639	0.110424	1	24	7.73643e-05	20.7709	2.90167e-05	0.0112344	24	23.6771	14.3029	10.3327	0.722422	19.9865	19.6176	12.7129	5.23454	5.09385	7.68944	19.0472	25.0411
Tbcd	0.000772415	0.213612	24	10.1353	4.01387	0.0031746	0.18868	24	10.5	3.55416	0.10028	1	24	9.18008	32.9534	3.24627e-05	0.0122195	24	9.93944	29.0406	4.06513	0.139981	25.4011	29.375	31.4194	32.8243	32.7675	28.8271	27.3682	24.3425
Selenbp1	0.000824944	0.223576	24	10.6153	49.781	0.0031746	0.18868	24	12	45.4091	0.109803	1	24	11.8321	339.301	3.72365e-05	0.0136376	24	11.4843	285.14	50.6371	0.177587	223.144	266.404	282.721	329.169	336.433	321.259	264.836	257.155
Wdr45	0.000918721	0.226356	24	10.7848	6.39842	0.0031746	0.18868	24	12	6.06788	0.10651	1	24	11.6599	32.2271	3.98414e-05	0.0142077	24	11.4823	25.1433	6.56835	0.261237	20.0379	22.0826	26.0171	30.1058	32.9462	28.6274	21.2587	20.0705
Clock	7.11409e-05	0.0897558	24	22.2998	37.5606	0.0440476	0.413932	24	0	35.6466	0.104277	1	24	20.9999	105.316	4.16446e-05	0.0144699	24	22.4297	82.4198	37.5471	0.45556	124.099	105.971	70.7138	43.0331	45.934	72.0677	93.9366	103.604
Slc30a10	0.00024162	0.155914	24	22.4095	27.9173	0.0138889	0.278415	24	0	27.1249	0.100235	1	24	20.9999	70.7536	4.27143e-05	0.0144705	24	22.4682	47.2887	27.9153	0.590316	72.2807	65.5289	33.3545	17.9594	26.1246	34.486	59.7125	68.8631
Wdr83os	0.00720413	0.365211	24	10.8919	1.87176	0.000396825	0.173464	24	12	1.45762	0.133282	1	24	11.8548	14.1641	4.7632e-05	0.0154273	24	11.5831	12.0017	1.93994	0.161638	10.2119	11.3238	11.9603	13.014	14.9539	12.6826	11.362	10.5054
Dcaf8	0.00811356	0.367326	24	9.83719	10.2914	0.000396825	0.173464	24	9	9.56334	0.118865	1	24	8.95273	154.319	4.78155e-05	0.0154273	24	9.26277	141.111	10.8928	0.077193	135.43	137.631	149.759	155.272	148.645	136.712	135.182	130.257
Atg14	0.00117546	0.252835	24	10.2516	3.73079	0.0031746	0.18868	24	10.5	3.16965	0.109729	1	24	9.22922	16.1006	5.07236e-05	0.015809	24	9.99477	12.2301	3.76495	0.307843	8.7457	10.425	14.2718	16.8604	14.3879	13.082	11.3896	8.67841
Alox12	0.000267636	0.158171	24	22.2174	0.242847	0.0138889	0.278415	24	0	0.21917	0.11167	1	24	20.9999	0.89716	5.13318e-05	0.015809	24	22.4007	0.751249	0.242674	0.242674	1.02891	0.898711	0.671929	0.462722	0.565984	0.665753	0.82934	0.886649
Hsd3b7	0.000313187	0.158171	24	22.081	7.11252	0.0138889	0.278415	24	0	6.73256	0.103321	1	24	20.9999	19.6484	5.50183e-05	0.0165678	24	22.3529	13.8071	7.10135	0.514326	22.0443	15.9971	9.7564	6.21782	8.87701	12.2498	15.6469	19.6675
Zfp114	0.00138107	0.268752	24	21.8193	0.0576214	0.0031746	0.18868	24	22.5	0.0517807	0.111975	1	24	20.9999	0.242619	5.94245e-05	0.0175057	24	21.7734	0.199126	0.0589887	0.0589887	0.270088	0.20542	0.161263	0.144601	0.148943	0.199726	0.221157	0.241813
Mad2l2	0.000391774	0.170943	24	22.9313	2.78215	0.0138889	0.278415	24	0	2.83025	0.0938751	1	24	7.73643e-05	10.8604	6.1515e-05	0.017736	24	23.6448	7.7269	2.89805	0.37506	10.7135	9.60337	7.74062	5.00318	5.27259	5.85862	7.57464	10.0487
Pabpn1	0.00145988	0.268752	24	22.4026	2.09031	0.0031746	0.18868	24	22.5	1.95502	0.114472	1	24	7.73643e-05	17.654	6.35791e-05	0.0179492	24	22.9644	16.0049	2.08771	0.130442	17.7872	15.6376	15.4006	14.0552	14.1496	15.046	17.6926	18.2703
Gm3055	0.000392138	0.170943	24	22.0609	0.137127	0.0138889	0.278415	24	0	0.118614	0.101926	1	24	20.9999	0.755161	6.61394e-05	0.0182909	24	22.3458	0.641537	0.13689	0.13689	0.797402	0.667614	0.56442	0.520562	0.506407	0.632465	0.691117	0.752308
Kifc3	0.00178215	0.274431	24	21.9653	6.7909	0.0031746	0.18868	24	22.5	6.35796	0.101381	1	24	20.9999	30.5183	6.80489e-05	0.0184426	24	21.8227	22.6459	6.92633	0.305854	27.4975	24.2138	15.7769	15.6169	18.1115	23.1682	26.1795	30.6028
Ddc	0.000424297	0.170943	24	22.5218	36.3649	0.0138889	0.278415	24	0	37.2722	0.102292	1	24	7.73643e-05	111.547	7.10569e-05	0.0185761	24	23.5101	76.9094	36.789	0.478342	107.636	99.115	60.608	43.5248	45.3085	55.2908	99.3549	104.437
Ap1g1	0.00122776	0.255959	24	22.6412	7.75104	0.0031746	0.18868	24	1.5	7.70265	0.156119	1	24	7.73643e-05	105.661	7.16398e-05	0.0185761	24	0.0459678	89.8786	8.0439	0.0894974	104.974	99.3717	88.9365	85.2854	82.9613	80.2232	88.0206	89.256
Wdr91	0.000441517	0.170943	24	22.8304	4.85075	0.0138889	0.278415	24	0	4.77286	0.104195	1	24	7.73643e-05	23.2283	7.47476e-05	0.0185761	24	23.6115	19.6436	5.01832	0.255468	22.6874	22.8016	18.0346	15.4144	14.7454	16.9767	22.254	24.2351
Nfil3	0.00212502	0.283444	24	21.7311	12.178	0.0031746	0.18868	24	22.5	12.1993	0.0953932	1	24	20.9999	34.2908	7.52143e-05	0.0185761	24	21.7436	21.8323	12.4924	0.572197	32.1533	22.6475	10.2671	8.32899	15.1922	20.9379	31.6808	33.4509
Tmem192	0.00177574	0.274431	24	10.3797	0.863561	0.0031746	0.18868	24	10.5	0.759526	0.114473	1	24	9.5108	6.81454	7.53958e-05	0.0185761	24	10.1308	5.89192	0.86698	0.147147	5.36317	5.44362	6.28925	7.02758	6.43434	6.1915	5.30778	5.07808
Insig2	0.000500541	0.178496	24	22.8396	90.4775	0.0138889	0.278415	24	0	86.8686	0.0981879	1	24	7.73643e-05	225.298	7.91677e-05	0.0185884	24	23.6146	137.44	93.6623	0.681476	216.765	207.448	133.875	39.2157	51.5641	89.111	155.197	206.347
Olfr1034	0.0179185	0.451707	24	21.1738	0.653084	0.000396825	0.173464	24	19.5	0.850995	0.0960144	1	24	20.9999	3.0929	7.9179e-05	0.0185884	24	20.5613	2.03157	0.761732	0.374948	2.19929	1.46361	1.12884	1.24356	1.78732	2.29685	3.12385	3.00923
Slc25a47	0.000478553	0.177206	24	10.652	170.578	0.0138889	0.278415	24	12	152.679	0.103286	1	24	9.90399	461.913	7.95607e-05	0.0185884	24	10.8495	283.49	171.28	0.604183	165.178	170.524	332.658	480.074	434.437	334.607	227.543	122.895
Ggct	0.000483847	0.177206	24	22.4924	1.48948	0.0138889	0.278415	24	0	1.51092	0.104474	1	24	20.9999	6.23488	8.11265e-05	0.018633	24	22.4973	4.86158	1.48948	0.306378	6.4178	5.77743	3.97782	3.52825	3.84273	4.0278	5.11426	6.20654
Slc16a1	0.000545147	0.184682	24	21.9655	19.8688	0.0138889	0.278415	24	0	20.9467	0.0965635	1	24	20.9999	83.9279	8.40348e-05	0.0189793	24	22.3124	66.1922	19.818	0.2994	85.2706	70.2278	51.3622	48.8171	47.8107	64.0787	79.7272	82.2434
Kpnb1	0.000521941	0.181355	24	22.7934	17.3434	0.0138889	0.278415	24	0	16.6737	0.10468	1	24	7.73643e-05	132.112	8.67938e-05	0.019281	24	23.5993	119.364	17.8965	0.149932	130.671	129.312	116.969	100.787	102.681	110.715	128.658	135.12
2210408I21Rik	0.00240414	0.284951	24	9.99743	0.64048	0.0031746	0.18868	24	10.5	0.564559	0.106579	1	24	8.2794	3.9029	9.21865e-05	0.0201487	24	9.59792	3.28795	0.660495	0.200884	2.67516	3.33807	3.81655	3.96205	3.60442	3.39534	3.01327	2.49874
Mlh3	0.00215443	0.283444	24	21.7327	3.59037	0.0031746	0.18868	24	22.5	3.00897	0.126912	1	24	20.9999	18.0286	9.75267e-05	0.0207487	24	21.7441	15.685	3.68292	0.234805	20.6038	15.9714	13.5192	12.0308	13.2559	14.813	17.4991	17.7867
Trim2	0.000654522	0.197098	24	23.0158	21.3344	0.0138889	0.278415	24	0	22.6696	0.0973783	1	24	7.73643e-05	63.4514	9.92013e-05	0.0207487	24	23.6728	44.429	22.347	0.502983	61.6572	59.7514	41.122	28.226	22.0734	27.9949	52.1655	62.4416
Mcm10	0.014548	0.441005	24	10.0386	39.152	0.000396825	0.173464	24	10.5	29.9186	0.153916	1	24	9.28208	115.575	9.95252e-05	0.0207487	24	9.94063	65.5312	39.6887	0.605646	39.7929	44.9355	79.5832	120.828	107.596	50.4973	43.3468	37.6692
Lnx2	0.000675356	0.198951	24	22.3013	7.76944	0.0138889	0.278415	24	0	7.07765	0.105852	1	24	20.9999	26.7134	0.00010957	0.0224968	24	22.4302	20.2689	7.7667	0.383184	27.0088	24.9071	16.3951	11.2499	14.9539	16.9434	24.6038	26.089
Arid3a	0.00270049	0.285001	24	22.2544	0.62277	0.0031746	0.18868	24	21	0.538628	0.121398	1	24	20.9999	2.74195	0.000114126	0.0230825	24	21.4164	1.96585	0.640472	0.325799	2.22501	2.0542	1.66638	1.12788	1.40007	2.1637	2.32215	2.76742
Susd6	0.00273288	0.285001	24	10.582	7.54729	0.0031746	0.18868	24	12	6.4133	0.124974	1	24	11.34	41.4553	0.000118243	0.0234136	24	11.3075	32.9009	7.63004	0.23191	24.5137	28.2966	31.7688	40.9219	42.6573	34.5193	31.4043	29.1251
Akt2	0.00319859	0.301001	24	11.1552	7.25445	0.0031746	0.18868	24	12	7.18488	0.107998	1	24	11.9727	80.866	0.00011941	0.0234136	24	11.7098	72.5314	7.66142	0.105629	66.5059	67.2493	72.7564	76.7539	81.7102	78.6587	69.554	67.0629
Cry1	0.0296853	0.496417	24	20.9323	15.0377	0.000396825	0.173464	24	19.5	19.1524	0.0944815	1	24	19.7617	42.3323	0.000120947	0.0234136	24	20.063	24.3282	19.0431	0.782758	34.1468	14.5848	4.56911	7.46139	14.656	36.2502	41.6882	41.2695
Sept11	0.00303641	0.294436	24	22.7434	4.89173	0.0031746	0.18868	24	0	3.7384	0.12269	1	24	7.73643e-05	21.0998	0.000127465	0.0236768	24	23.5829	17.2203	5.03001	0.292098	21.1054	19.0013	16.9864	12.7538	10.6345	16.9767	18.2455	22.0588
Arl4a	0.00353808	0.303446	24	21.8744	9.69779	0.0031746	0.18868	24	21	9.15648	0.106086	1	24	20.9999	34.5541	0.000128293	0.0236768	24	21.2909	24.8586	10.2295	0.411507	31.5617	25.0355	20.1041	10.6715	18.6775	25.6315	33.1183	34.0688
Lat2	0.000765011	0.213612	24	22.6948	0.218011	0.0138889	0.278415	24	22.5	0.189699	0.117175	1	24	20.9999	0.729502	0.000133249	0.0236768	24	22.0683	0.439198	0.216879	0.216879	0.565898	0.539227	0.295649	0.231361	0.297886	0.332876	0.525249	0.72544
Pigh	0.000873316	0.226356	24	22.8851	0.565185	0.0138889	0.278415	24	0	0.538181	0.103248	1	24	7.73643e-05	4.22812	0.000133926	0.0236768	24	23.6296	3.73983	0.586902	0.156933	4.15421	4.2111	3.54778	3.29689	3.09802	3.4952	3.87025	4.24517
Hgsnat	0.00401865	0.30557	24	11.3478	6.02367	0.0031746	0.18868	24	13.5	6.28025	0.0985559	1	24	12.0702	54.3621	0.000134388	0.0236768	24	12.3028	47.3529	6.74278	0.142394	42.3395	41.1866	46.4975	51.6802	54.6919	52.5612	46.6089	43.2577
Pla2g12a	0.000937159	0.226776	24	10.0662	2.45758	0.0138889	0.278415	24	10.5	2.43597	0.0994605	1	24	9.35806	10.7072	0.000137819	0.0236768	24	9.9751	8.12226	2.48723	0.306224	6.50783	7.52349	9.81016	10.845	10.009	8.6215	5.75009	5.91099
Palm	0.00341096	0.302264	24	22.0324	0.608571	0.0031746	0.18868	24	21	0.599519	0.119749	1	24	20.9999	2.95707	0.000138013	0.0236768	24	21.3432	1.97316	0.635448	0.322047	2.18643	1.87445	1.34386	1.24356	1.60859	2.19698	2.32215	3.00923
Syt11	0.000859313	0.226356	24	22.5889	1.10202	0.0138889	0.278415	24	22.5	1.07407	0.109572	1	24	7.73643e-05	3.42245	0.000139026	0.0236768	24	23.027	2.63108	1.10842	0.421278	3.30536	3.26104	2.17705	1.61953	1.45964	2.19698	3.45558	3.57346
Slc17a1	0.00362371	0.304485	24	22	2.70861	0.0031746	0.18868	24	22.5	2.34858	0.114252	1	24	20.9999	10.9254	0.000139632	0.0236768	24	21.8344	8.29218	2.76002	0.332846	10.9321	7.72891	7.49872	5.06102	6.16624	7.72273	10.5879	10.6398
Agap3	0.00387477	0.304485	24	11.1273	2.08195	0.0031746	0.18868	24	13.5	2.29971	0.10698	1	24	12.0431	21.8131	0.000139779	0.0236768	24	12.2205	19.3673	2.27806	0.117624	16.8998	17.3323	18.4108	21.5744	21.7457	20.8048	19.7659	18.4047
Nek6	0.00281722	0.287039	24	22.5784	3.14173	0.0031746	0.18868	24	1.5	2.61589	0.149732	1	24	7.73643e-05	47.0268	0.000141903	0.0237398	24	0.0255148	41.6251	3.23729	0.0777726	46.4551	45.7829	40.1276	39.5049	38.6954	39.346	40.61	42.4786
Tmem9	0.000902478	0.226356	24	10.6759	2.39992	0.0138889	0.278415	24	10.5	2.37828	0.112998	1	24	11.2748	9.34459	0.000148935	0.0245412	24	10.8166	6.84557	2.40904	0.351912	5.3889	5.8031	7.60623	9.16767	9.05574	8.25533	4.89311	4.59445
Taf1	0.0040006	0.30557	24	23.0264	5.62919	0.0031746	0.18868	24	0	5.40701	0.113133	1	24	7.73643e-05	37.1859	0.000150789	0.0245412	24	23.6763	31.3626	5.90044	0.188136	37.0792	34.9213	31.0969	28.5152	24.1884	26.1974	33.92	34.9823
Stx2	0.00450636	0.319598	24	21.7292	3.37956	0.0031746	0.18868	24	21	3.76663	0.10147	1	24	20.9999	16.7063	0.000152126	0.0245412	24	21.2427	12.73	3.59658	0.282529	15.6137	11.3238	10.1596	9.31227	10.3664	12.4163	16.3656	16.2821
Smoc1	0.00371613	0.304485	24	10.1658	11.8834	0.0031746	0.18868	24	10.5	9.76081	0.127093	1	24	9.80407	72.3542	0.000156429	0.0249384	24	10.1566	59.0828	11.946	0.20219	47.6512	55.2579	60.9036	73.6884	72.4459	57.6209	54.0453	51.0495
Tor4a	0.00233992	0.284951	24	23.055	0.795292	0.0031746	0.18868	24	22.5	0.532842	0.205506	1	24	20.9999	7.22399	0.000158872	0.025025	24	22.1888	5.66061	0.778282	0.137491	5.81332	5.54633	5.24104	4.97426	5.06407	5.3926	5.99889	7.2544
Rai14	0.000991476	0.23571	24	22.2405	9.39172	0.0138889	0.278415	24	0	7.8776	0.115432	1	24	20.9999	38.3171	0.000164505	0.025025	24	22.4089	31.0754	9.38607	0.302041	43.1626	32.6617	28.0866	23.4542	20.5541	29.6926	32.7313	38.2603
Tars	0.00106954	0.244534	24	22.6769	44.2185	0.0138889	0.278415	24	0	42.6177	0.107847	1	24	7.73643e-05	182.338	0.000165617	0.025025	24	23.561	143.36	45.2522	0.315653	177.281	176.712	136.805	92.7757	101.877	122.532	163.988	174.912
Lrfn3	0.00104086	0.243184	24	22.4511	4.30193	0.0138889	0.278415	24	22.5	4.26274	0.110894	1	24	20.9999	11.2869	0.000165713	0.025025	24	21.9864	6.92438	4.32063	0.623973	9.22157	9.32092	4.89164	2.02441	3.1278	5.72547	10.2285	10.8547
Lmbrd1	0.000762559	0.213612	24	10.9851	5.26528	0.0138889	0.278415	24	10.5	4.3971	0.151888	1	24	11.4194	69.6709	0.000166206	0.025025	24	10.9682	64.5556	5.31691	0.0823618	62.8533	63.7314	67.0316	67.9333	70.3905	66.9414	60.7906	56.7724
Serhl	0.00414665	0.30557	24	10.7399	2.87153	0.0031746	0.18868	24	12	2.44726	0.124793	1	24	11.8837	18.8569	0.000169236	0.0252013	24	11.5426	15.7427	2.94767	0.18724	12.5012	15.3808	15.8844	17.3231	19.6307	17.243	14.6517	13.3266
Slc25a11	0.00451855	0.319598	24	11.0329	10.1887	0.0031746	0.18868	24	13.5	10.4221	0.117306	1	24	11.8733	68.41	0.000172772	0.0254482	24	12.1308	56.3806	10.997	0.19505	48.3071	48.4277	56.442	63.9134	68.7819	64.7444	50.5068	49.921
Sirt3	0.0306338	0.499907	24	11.5127	11.9256	0.000396825	0.173464	24	13.5	9.81775	0.143344	1	24	12.3198	66.1396	0.000178044	0.0259428	24	12.4428	50.5743	13.6841	0.270575	39.227	40.9299	47.7607	52.49	71.8799	60.5835	48.627	43.0965
Rassf3	0.00514755	0.338988	24	9.91666	12.8042	0.0031746	0.18868	24	9	12.4585	0.112707	1	24	8.99619	74.2975	0.000186735	0.0263192	24	9.30362	60.825	13.4713	0.221477	52.3199	65.0153	65.9834	78.8651	69.05	60.9829	47.6594	46.7237
Ntmt1	0.0256438	0.482512	24	10.8925	1.20848	0.000396825	0.173464	24	12	0.785657	0.181199	1	24	11.8096	7.29532	0.000186919	0.0263192	24	11.5682	5.82807	1.25163	0.21476	4.72011	5.41794	5.6442	6.50702	8.01314	5.95849	5.47364	4.89
Adra2b	0.00412076	0.30557	24	22.4016	1.52479	0.0031746	0.18868	24	21	1.35019	0.141563	1	24	20.9999	8.05399	0.000187616	0.0263192	24	21.4648	6.03791	1.55147	0.256955	6.40494	6.05988	5.67108	3.90421	4.52787	6.29136	7.46406	7.97984
Ap2a2	0.00113604	0.248298	24	22.7146	18.9624	0.0138889	0.278415	24	22.5	20.2385	0.119011	1	24	7.73643e-05	120.152	0.00018987	0.0263192	24	23.0694	106.343	19.1555	0.180129	119.597	110.002	98.9617	90.7513	90.8553	92.1402	120.973	127.463
Blcap	0.00471759	0.327826	24	21.9586	5.54296	0.0031746	0.18868	24	22.5	5.18241	0.125743	1	24	20.8185	23.5587	0.000190339	0.0263192	24	21.7607	19.7709	5.672	0.286887	24.4751	22.3137	16.8251	13.5057	13.5836	21.1709	22.9174	23.3753
Mknk2	0.00120839	0.255858	24	10.5257	36.2541	0.0138889	0.278415	24	12	33.1834	0.116764	1	24	9.74606	119.869	0.000196964	0.0269187	24	10.7539	81.4513	36.2936	0.445586	43.9214	48.5047	90.1191	123.98	113.524	92.24	80.6671	58.6532
Zfp523	0.00110077	0.244534	24	10.3334	1.23979	0.0138889	0.278415	24	12	1.16279	0.132386	1	24	9.73436	13.411	0.000202505	0.0269187	24	10.684	12.0999	1.23643	0.102185	10.6106	10.8872	12.471	13.5635	13.107	12.5827	11.9701	11.607
Fip1l1	0.00273689	0.285001	24	21.7571	5.71015	0.0031746	0.18868	24	0	3.58175	0.233058	1	24	20.9999	39.8998	0.000202586	0.0269187	24	22.2394	39.3603	5.68186	0.144355	50.9566	41.8799	37.2517	34.6174	34.6144	36.8161	39.0619	39.6843
Ddx19a	0.00492707	0.335511	24	10.8313	1.70286	0.0031746	0.18868	24	12	1.96408	0.13091	1	24	11.8358	17.0232	0.000204534	0.0269187	24	11.5567	15.1297	1.75751	0.116163	13.633	14.7902	15.0512	16.6869	16.7114	16.6105	13.9053	13.649
Tprkb	0.00157169	0.268752	24	9.82399	14.7674	0.0138889	0.278415	24	9	15.1194	0.0938416	1	24	8.43954	119.074	0.000204607	0.0269187	24	9.08736	103.76	15.8394	0.152654	91.8427	106.202	118.071	118.023	114.061	102.26	93.9642	85.6557
Mthfr	0.00145019	0.268752	24	22.208	12.6809	0.0138889	0.278415	24	22.5	13.6677	0.108045	1	24	20.9999	29.2917	0.000215511	0.0277162	24	21.9045	15.9115	12.8423	0.807105	25.877	18.4878	7.39122	4.77182	5.65984	9.85314	28.1146	27.1368
Mzt2	0.00624928	0.351388	24	9.79983	0.974415	0.0031746	0.18868	24	9	0.99589	0.110003	1	24	8.98887	8.13753	0.000216035	0.0277162	24	9.26246	6.91191	1.03286	0.149432	6.44352	6.80453	7.60623	8.18439	7.83441	6.4578	6.02654	5.93786
Efnb1	0.00522185	0.338988	24	22.4061	3.54374	0.0031746	0.18868	24	22.5	3.03229	0.132193	1	24	20.9999	15.5492	0.000216805	0.0277162	24	21.9713	12.8556	3.56494	0.277307	15.2921	14.7132	12.5248	8.35791	8.84722	12.616	15.2322	15.2611
Prpsap1	0.00143215	0.268752	24	10.9326	9.54194	0.0138889	0.278415	24	12	9.16985	0.111451	1	24	11.6315	51.0264	0.000218965	0.0277308	24	11.5217	40.1981	9.87741	0.245718	33.6838	35.4862	39.5363	49.5112	51.3854	44.8384	35.3852	31.7582
Pdgfc	0.00664446	0.352753	24	23.2391	1.19062	0.0031746	0.18868	24	1.5	1.12222	0.110032	1	24	7.73643e-05	5.16474	0.000227755	0.0282821	24	0.242745	3.63761	1.31586	0.361738	5.11881	4.49355	3.4134	3.18121	2.41288	2.46328	3.26207	4.75566
Fbxo34	0.00562897	0.346331	24	10.1106	5.70434	0.0031746	0.18868	24	10.5	4.55141	0.131686	1	24	9.371	25.3976	0.000230465	0.0282821	24	9.99428	19.2356	5.76706	0.299811	14.1989	16.8958	21.1792	27.8501	21.984	20.9712	15.8404	14.9656
Zdhhc17	0.00648203	0.351388	24	23.1135	1.00648	0.0031746	0.18868	24	1.5	0.991318	0.115493	1	24	7.74808e-05	14.2533	0.000232429	0.0282821	24	0.201133	13.1972	1.09853	0.0832392	14.2632	13.9429	13.573	12.4646	11.7069	12.5161	13.4353	13.6759
Slc25a32	0.00156971	0.268752	24	10.928	4.45037	0.0138889	0.278415	24	12	3.99256	0.109733	1	24	10.5921	24.1372	0.000233749	0.0282821	24	11.172	19.4439	4.53157	0.233059	16.5911	15.7916	20.0772	24.0615	24.1884	21.0045	18.5219	15.3148
Pip4k2b	0.00164472	0.2718	24	21.7951	3.27762	0.0138889	0.278415	24	22.5	3.06885	0.104731	1	24	20.9999	21.4962	0.000233754	0.0282821	24	21.7652	18.5624	3.35732	0.180866	22.3015	18.7445	15.965	15.212	16.622	17.9753	20.3188	21.3602
Mitf	0.00141983	0.268752	24	22.2241	1.55481	0.0138889	0.278415	24	0	1.32039	0.127773	1	24	20.9999	6.91173	0.00024437	0.0293049	24	22.4031	6.06119	1.55376	0.256345	7.88399	7.03562	5.72483	4.01989	5.03428	5.35931	6.60708	6.82451
Rtn4rl1	0.006703	0.353433	24	21.9024	3.30884	0.0031746	0.18868	24	22.5	2.82846	0.12201	1	24	20.9999	11.2873	0.000250723	0.029803	24	21.8014	8.45988	3.3804	0.39958	10.8421	9.21821	6.96118	3.73069	5.54068	9.65341	10.3944	11.3384
Arntl	0.00167577	0.273594	24	22.4331	17.7086	0.0138889	0.278415	24	22.5	18.5931	0.113956	1	24	20.9999	33.8846	0.000255344	0.0298498	24	21.9804	17.6951	17.7973	1.00578	29.9798	31.0184	5.83234	0.983283	2.3533	10.6188	28.6675	32.1074
Tspan33	0.00163176	0.2718	24	22.4873	2.32703	0.0138889	0.278415	24	0	2.14516	0.117124	1	24	7.73643e-05	13.0671	0.000255522	0.0298498	24	23.4988	10.1591	2.34795	0.231119	12.887	11.5035	8.57381	8.96523	7.71525	9.08752	10.4497	12.0907
Pcgf5	0.00693822	0.358854	24	11.0695	1.3128	0.0031746	0.18868	24	12	1.08782	0.12246	1	24	11.8994	9.22977	0.000259054	0.0300038	24	11.6568	7.91485	1.37697	0.173973	6.48211	7.31807	7.57936	9.22551	9.29405	8.48835	8.34869	6.5827
Bri3	0.00181266	0.275717	24	11.1135	5.68349	0.0138889	0.278415	24	12	5.5073	0.109107	1	24	11.8886	18.637	0.000263121	0.030205	24	11.6678	12.3	5.97585	0.485842	8.14122	9.03846	12.6591	16.0796	19.0647	16.6771	9.5927	7.14693
Zdhhc1	0.00642476	0.351388	24	10.353	0.295586	0.0031746	0.18868	24	10.5	0.267741	0.13595	1	24	9.68716	1.67641	0.000265249	0.030205	24	10.1804	1.43165	0.296632	0.207195	1.09321	1.46361	1.532	1.76413	1.5788	1.56452	1.38223	1.07473
Msl1	0.00918268	0.386442	24	23.4257	3.20187	0.0031746	0.18868	24	1.5	3.53152	0.103989	1	24	5.33122e-05	31.9425	0.000286268	0.0323268	24	0.304806	27.7465	3.60274	0.129845	31.7803	31.6603	29.0542	26.2595	22.8479	24.4664	27.4235	28.4802
Fah	0.00194172	0.276971	24	10.4815	36.1222	0.0138889	0.278415	24	12	31.6799	0.116138	1	24	9.54495	423.242	0.00029437	0.0326015	24	10.6721	383.739	36.1248	0.0941392	357.545	362.848	399.448	419.486	425.679	381.077	374.862	348.964
Hs2st1	0.00215441	0.283444	24	21.8881	2.16957	0.0138889	0.278415	24	22.5	2.37396	0.106078	1	24	20.9999	18.067	0.000297746	0.0326015	24	21.7966	16.151	2.21729	0.137285	18.2502	16.3309	14.5943	14.2287	14.2687	15.6119	18.1902	17.733
Nrg4	0.00726363	0.365909	24	10.7169	9.31051	0.0031746	0.18868	24	12	7.89051	0.137712	1	24	10.9496	21.7586	0.000297859	0.0326015	24	11.2209	11.1352	9.44579	0.848284	4.28282	4.90439	9.59514	24.1772	19.8988	14.58	7.02175	4.62132
Zfp950	0.0018312	0.275717	24	22.7171	7.61092	0.0138889	0.278415	24	1.5	6.10322	0.12606	1	24	7.73643e-05	40.6101	0.000300309	0.0326015	24	0.0707431	29.7164	7.96571	0.268058	39.8315	37.9513	29.1886	23.9458	21.3882	22.569	31.9849	30.8715
Grem2	0.0451041	0.530695	24	9.47481	12.0716	0.000396825	0.173464	24	9	10.6004	0.179422	1	24	8.94557	28.8001	0.000300729	0.0326015	24	9.14002	11.6633	13.0569	1.11949	3.84554	7.57485	18.8946	33.7208	18.6477	3.96123	3.75967	2.90176
1110034G24Rik	0.00747495	0.367326	24	10.2592	1.24399	0.0031746	0.18868	24	10.5	1.00834	0.13807	1	24	9.69706	4.41546	0.000305922	0.0329012	24	10.1523	3.0893	1.25022	0.404695	2.0964	2.72181	3.27901	5.0321	3.75337	3.4952	2.29451	2.04198
Rap2c	0.00192018	0.276812	24	22.7351	4.96002	0.0138889	0.278415	24	1.5	5.01277	0.125864	1	24	7.73643e-05	37.4977	0.000312312	0.0329628	24	0.0766125	30.3396	5.20154	0.171444	37.1692	35.2295	31.4194	24.6399	25.1714	28.0948	28.7781	32.2149
Ncoa5	0.00926309	0.38752	24	21.4985	3.39207	0.0031746	0.18868	24	21	3.4962	0.114184	1	24	20.9999	13.1707	0.0003124	0.0329628	24	21.1661	10.0972	3.65773	0.362251	13.3501	10.2967	6.66553	6.0443	8.07272	11.3844	11.6108	13.3535
Exosc9	0.080778	0.620886	24	0.475465	1.24211	0.000396825	0.173464	24	3	1.57378	0.106091	1	24	2.41437	11.9932	0.000315808	0.0329628	24	1.97147	10.31	1.92828	0.18703	11.4594	12.6847	10.9928	10.0064	8.84722	8.12218	9.62034	10.7473
Camk2b	0.00756592	0.367326	24	10.4378	3.82438	0.0031746	0.18868	24	10.5	3.20617	0.141805	1	24	9.84795	11.4354	0.000316225	0.0329628	24	10.2621	6.95685	3.82999	0.550535	4.96447	4.98143	7.41809	12.6092	10.3664	7.32328	4.25728	3.73467
Zxdb	0.00190613	0.276812	24	22.5334	0.490063	0.0138889	0.278415	24	0	0.491626	0.130006	1	24	7.73643e-05	3.31536	0.000319059	0.0330044	24	23.5139	2.67796	0.496213	0.185295	3.25392	3.184	2.55333	2.28469	2.11499	2.36342	2.87505	2.79429
Dtnbp1	0.00225825	0.284951	24	10.1497	3.58049	0.0138889	0.278415	24	9	3.59435	0.111197	1	24	9.31372	24.0222	0.000322684	0.0331265	24	9.48714	20.3088	3.69165	0.181776	18.1216	18.8216	23.2756	24.0037	22.8181	21.5038	16.9185	17.0075
Rab11fip4	0.0105263	0.407555	24	23.5728	3.72704	0.0031746	0.18868	24	1.5	4.614	0.106396	1	24	0.28952	10.6947	0.000328026	0.0334216	24	0.45233	7.22039	4.29735	0.595169	10.6106	10.1426	9.16511	3.75961	3.42569	3.62835	6.57943	10.4517
Dnm1l	0.00145688	0.268752	24	21.9695	7.27821	0.0138889	0.278415	24	0	6.24667	0.178822	1	24	20.9999	53.1689	0.000332974	0.0334827	24	22.3138	51.2235	7.25987	0.141729	63.1234	57.2864	46.4168	45.5492	44.8914	48.5334	50.9768	53.0109
Pnp	0.00208523	0.283444	24	22.1111	27.3305	0.0138889	0.278415	24	0	23.4885	0.125198	1	24	20.9999	100.436	0.000333567	0.0334827	24	22.3634	83.2022	27.2935	0.328038	114.016	93.3632	77.6212	48.3833	57.7006	84.0513	89.4581	101.024
Tmc4	0.00158365	0.268752	24	22.6284	0.389113	0.0138889	0.278415	24	21	0.354416	0.167032	1	24	20.9999	3.57188	0.000337328	0.0336112	24	21.539	2.92416	0.389076	0.133056	2.90666	2.87587	2.79522	2.42929	2.53203	2.9626	3.345	3.5466
Sdr39u1	0.0023707	0.284951	24	10.7467	1.26395	0.0138889	0.278415	24	12	1.21844	0.11513	1	24	11.8849	6.3141	0.000346462	0.0341501	24	11.5453	5.19195	1.29808	0.250018	3.6912	4.64762	5.67108	6.0443	6.10667	6.42451	4.89311	4.05709
Zfp74	0.00221432	0.284951	24	21.9309	0.879954	0.0138889	0.278415	24	0	0.734463	0.12381	1	24	20.9999	5.44377	0.000347776	0.0341501	24	22.3003	4.84908	0.877401	0.180942	5.92907	5.0071	4.46161	3.96205	3.9321	4.95986	5.08662	5.45424
Lurap1l	0.00266958	0.285001	24	11.1669	10.2759	0.0138889	0.278415	24	12	11.1002	0.106896	1	24	11.7867	48.9188	0.000359862	0.0350826	24	11.6515	38.1214	10.8133	0.283654	30.1727	30.5048	36.8486	49.1931	46.8873	46.0368	36.7674	28.5609
Alg6	0.00213795	0.283444	24	10.6363	1.25197	0.0138889	0.278415	24	10.5	1.13785	0.135812	1	24	11.2027	10.4394	0.000365217	0.0351077	24	10.7795	9.12354	1.25546	0.137606	8.50134	9.1155	9.54139	10.0642	10.8133	9.22067	8.15518	7.57682
Josd1	0.00256184	0.285001	24	10.8359	3.95272	0.0138889	0.278415	24	12	4.30462	0.11337	1	24	11.7485	33.6215	0.0003653	0.0351077	24	11.5289	29.1934	4.07555	0.139605	25.4911	26.268	29.0273	33.287	32.8271	32.522	27.2024	26.9219
Zfp101	0.00248131	0.284951	24	22.6366	1.64586	0.0138889	0.278415	24	0	1.45573	0.118347	1	24	7.73643e-05	9.07699	0.000368746	0.0351893	24	23.5477	7.56731	1.67939	0.221927	8.96434	8.67898	7.65999	5.52374	5.80878	7.12355	8.12753	8.65155
Slc41a3	0.0025264	0.285001	24	10.6729	0.576675	0.0138889	0.278415	24	12	0.540027	0.118158	1	24	10.8374	1.72774	0.000373936	0.035435	24	11.1685	1.13711	0.583329	0.512992	0.57876	0.693291	1.34386	1.50385	1.93626	1.26493	1.0505	0.72544
Fam222a	0.00247725	0.284951	24	22.5109	1.04583	0.0138889	0.278415	24	22.5	1.09663	0.122797	1	24	20.9999	2.95166	0.000379989	0.0355079	24	22.0065	1.7796	1.04804	0.588917	2.37935	2.36233	0.994454	0.983283	0.804293	1.26493	2.65389	2.79429
Pxmp4	0.00275515	0.285001	24	22.0647	22.0021	0.0138889	0.278415	24	22.5	21.706	0.110522	1	24	20.9999	91.1802	0.000380314	0.0355079	24	21.8562	63.0319	22.3788	0.35504	83.2642	61.2151	41.794	46.2432	49.181	55.5238	77.2945	89.7396
Impa1	0.0121513	0.4276	24	23.3952	7.01532	0.0031746	0.18868	24	1.5	7.48699	0.11119	1	24	7.73643e-05	68.5491	0.000384901	0.0355079	24	0.294653	59.3057	7.87093	0.132718	68.9624	63.8085	61.9249	56.5677	50.5513	50.1645	59.3531	63.1133
Ccnf	0.108721	0.660459	24	20.2094	3.10024	0.000396825	0.173464	24	19.5	4.78736	0.0995049	1	24	18.7019	19.8309	0.000385186	0.0355079	24	19.4706	15.0739	4.54206	0.30132	16.0767	11.5805	9.43388	11.0764	15.2816	17.0433	21.4523	18.6465
Bhlhe40	0.00926548	0.38752	24	10.4853	51.4161	0.0031746	0.18868	24	10.5	40.2237	0.147929	1	24	9.77825	157.917	0.000389629	0.0356527	24	10.2548	98.856	51.4602	0.520558	68.9624	72.1536	101.596	179.623	137.623	107.652	69.6093	53.6288
Lrrc3	0.00291553	0.290502	24	21.9734	15.1759	0.0138889	0.278415	24	21	15.2547	0.108272	1	24	20.9999	86.6183	0.000392149	0.0356527	24	21.3237	66.79	15.9073	0.23817	75.9461	63.2436	55.0444	51.2175	56.6282	62.5807	85.6155	84.0436
Gm12166	0.00842991	0.374636	24	10.1142	0.317717	0.0031746	0.18868	24	12	0.237338	0.165056	1	24	10.2571	2.38706	0.00039465	0.0356527	24	10.7854	2.07573	0.313962	0.151254	1.64625	1.95149	2.2308	2.25577	2.53203	2.06383	2.01806	1.90764
Myef2	0.00274413	0.285001	24	22.7269	3.35991	0.0138889	0.278415	24	0	3.10539	0.118539	1	24	7.73643e-05	15.9324	0.00040229	0.0360374	24	23.5774	11.892	3.45083	0.290181	15.7551	13.9172	11.7991	8.15547	9.80046	8.72136	12.8548	14.1327
Ddhd1	0.000914304	0.226356	24	22.2979	6.61914	0.0440476	0.413932	24	0	6.56695	0.112816	1	24	20.9999	30.6311	0.000404227	0.0360374	24	22.429	25.8807	6.61673	0.255663	32.1276	31.2238	21.663	19.4054	20.286	23.6675	28.4187	30.2535
Arl14ep	0.0130031	0.436442	24	23.524	1.38432	0.0031746	0.18868	24	1.5	1.48309	0.11425	1	24	1.4568	14.4577	0.000417262	0.0369563	24	0.833391	13.2208	1.65866	0.125459	14.1732	14.8672	13.5998	12.0308	11.6771	11.8504	13.4353	14.1327
Fam89a	0.00298477	0.294436	24	22.1997	1.40268	0.0138889	0.278415	24	22.5	1.1768	0.116752	1	24	20.9999	4.138	0.000426549	0.0375335	24	21.9018	2.75106	1.4209	0.51649	3.70406	2.79884	2.41894	1.09896	1.25112	2.6963	4.06377	3.97649
Tollip	0.0128739	0.436134	24	11.3937	7.92023	0.0031746	0.18868	24	13.5	7.69723	0.122343	1	24	12.1013	58.8568	0.000438508	0.0383369	24	12.3287	48.546	8.91442	0.183628	41.7607	42.5732	45.7449	53.213	59.8453	56.1229	45.4202	43.6876
Npepl1	0.0133725	0.438527	24	11.3024	3.46939	0.0031746	0.18868	24	13.5	3.25663	0.120551	1	24	12.0694	41.3183	0.00044725	0.0385513	24	12.2875	36.7527	3.86621	0.105195	33.3623	33.2523	35.4241	38.8975	42.3594	39.1795	36.2145	35.3316
Spsb4	0.00301378	0.294436	24	22.6803	1.87953	0.0138889	0.278415	24	0	1.64357	0.12305	1	24	7.73643e-05	6.52878	0.000449694	0.0385513	24	23.5621	4.01441	1.92394	0.479257	6.67503	4.46788	4.3541	2.14009	2.32351	2.82945	3.8979	5.42737
Far1	0.00304192	0.294436	24	22.4279	1.24504	0.0138889	0.278415	24	0	0.98131	0.122164	1	24	7.73643e-05	6.58088	0.000450485	0.0385513	24	23.4793	5.46987	1.25047	0.22861	6.63644	5.62336	5.26792	4.33802	3.84273	5.52575	5.88831	6.63643
Spon2	0.00275492	0.285001	24	23.3557	4.36796	0.0138889	0.278415	24	0	4.01564	0.135545	1	24	0.548917	7.9912	0.000452339	0.0385513	24	23.9683	5.84731	4.74596	0.811648	7.57532	8.52491	5.6442	2.11117	1.40007	2.82945	7.40877	11.2846
Upp2	0.0031585	0.299307	24	10.0055	245.846	0.0138889	0.278415	24	12	224.796	0.123257	1	24	9.26319	585.549	0.000468626	0.0394919	24	10.4139	301.113	244.523	0.812063	87.1741	147.748	434.442	629.128	479.746	316.898	166.531	147.237
Nab1	0.0137796	0.438527	24	9.51576	3.3794	0.0031746	0.18868	24	9	3.36567	0.123784	1	24	8.34834	68.106	0.000469205	0.0394919	24	8.95488	64.0799	3.71752	0.0580137	61.027	63.4747	68.0798	68.1936	65.4158	63.2465	62.5875	60.6146
S1pr1	0.00335898	0.302264	24	22.0102	25.8204	0.0138889	0.278415	24	22.5	21.1197	0.117538	1	24	20.9999	90.9123	0.000474237	0.039669	24	21.8378	65.4833	26.303	0.401676	92.7044	69.5345	48.3789	35.7163	48.5852	67.2077	68.6141	93.125
Net1	0.0120534	0.4276	24	21.675	17.8141	0.0031746	0.18868	24	22.5	15.5071	0.144393	1	24	20.2656	70.3349	0.000477296	0.03968	24	21.483	58.6569	18.6304	0.317617	75.213	65.2978	48.3251	31.8989	46.3809	65.1106	66.0431	70.9857
Kctd12	0.00260626	0.285001	24	23.066	1.2422	0.0138889	0.278415	24	0	1.13805	0.156398	1	24	7.73643e-05	5.74372	0.000487255	0.0402109	24	23.6894	5.26436	1.30537	0.247964	5.72329	5.52065	5.21417	3.96205	3.90231	5.05972	5.63951	7.09319
Gata4	0.00280541	0.287039	24	22.6218	2.90471	0.0138889	0.278415	24	1.5	2.99442	0.146127	1	24	7.73643e-05	18.1181	0.000489617	0.0402109	24	0.0396154	13.5363	3.00784	0.222205	18.1602	15.9457	14.8362	10.2956	10.0686	12.0168	13.1036	13.864
Rbck1	0.00344018	0.302264	24	10.0199	5.84413	0.0138889	0.278415	24	10.5	4.64278	0.120536	1	24	10.3558	38.1845	0.000494392	0.0403585	24	10.2919	32.2332	5.84057	0.181197	25.8641	32.6104	33.2739	39.1	37.9507	32.4554	28.6952	27.916
Narf	0.00347012	0.302264	24	10.3444	18.7471	0.0138889	0.278415	24	10.5	17.899	0.123099	1	24	9.36293	65.7057	0.000506997	0.0411396	24	10.0701	43.6287	18.8534	0.432133	32.9636	30.7873	52.4911	67.9333	60.173	43.7067	33.8647	27.11
Tha1	0.00347867	0.302264	24	10.6489	1.28702	0.0138889	0.278415	24	13.5	1.10144	0.124872	1	24	10.53	6.51563	0.000514251	0.0411534	24	11.5378	5.09557	1.31387	0.257845	3.81981	4.13407	4.94539	6.70946	6.49392	5.35931	5.00368	4.29891
Psmb10	0.00341324	0.302264	24	10.9613	3.98026	0.0138889	0.278415	24	13.5	4.0456	0.127469	1	24	12.273	26.0467	0.000514947	0.0411534	24	12.2453	21.0568	4.30205	0.204307	14.7391	16.2538	20.2385	23.2228	26.2736	25.6315	20.7888	21.3064
Smco4	0.00347969	0.302264	24	22.3445	0.361138	0.0138889	0.278415	24	21	0.320246	0.125416	1	24	7.73643e-05	3.43339	0.000516278	0.0411534	24	22.4454	3.19531	0.36106	0.112997	3.4597	3.13265	3.09087	2.89201	2.74055	3.16232	3.51087	3.57346
Mipol1	0.0143694	0.441005	24	23.1658	0.729814	0.0031746	0.18868	24	3	0.798161	0.137425	1	24	7.73643e-05	5.23753	0.000531221	0.042097	24	0.690543	3.81246	0.831645	0.218139	5.27314	4.49355	3.97782	3.73069	2.85971	2.72959	3.56616	3.86901
Cpeb1	0.0130633	0.436442	24	10.1055	1.29581	0.0031746	0.18868	24	10.5	1.04235	0.15304	1	24	9.19397	4.76712	0.000536796	0.0422822	24	9.93398	3.14556	1.31312	0.417452	2.23787	2.388	3.60154	5.23454	4.05125	2.92931	2.62624	2.09572
Fars2	0.00389695	0.304485	24	10.9073	4.33859	0.0138889	0.278415	24	12	4.52569	0.118037	1	24	11.9725	29.1565	0.000539799	0.0422822	24	11.6277	24.432	4.50996	0.184593	19.8836	22.2624	25.157	26.78	29.1631	28.7605	22.1157	21.3333
Klc4	0.117009	0.673418	24	12.6292	8.19883	0.000396825	0.173464	24	15	9.3782	0.139051	1	24	14.2293	59.2677	0.000544644	0.0424165	24	13.9573	46.3349	12.896	0.278322	40.1273	34.5105	41.4177	45.5781	57.641	62.2812	46.9406	42.183
Slc35c2	0.00150363	0.268752	24	9.85594	2.59656	0.0440476	0.413932	24	10.5	2.69698	0.099012	1	24	9.17804	15.6867	0.000551867	0.0427335	24	9.84472	12.7897	2.64672	0.206942	10.7006	12.2481	14.5137	15.7036	15.1624	12.5161	10.6985	10.7741
Trappc8	0.0133787	0.438527	24	22.7481	5.70714	0.0031746	0.18868	24	1.5	4.45894	0.155759	1	24	7.73643e-05	69.8041	0.000555976	0.042807	24	0.0808655	60.6576	5.99362	0.0988107	70.5572	61.6516	60.5542	58.5921	53.8876	55.8234	59.6572	64.5373
Zfp738	0.00382366	0.304485	24	22.8874	1.0215	0.0138889	0.278415	24	1.5	0.858675	0.12675	1	24	7.73643e-05	8.65259	0.000564198	0.0431158	24	0.126569	7.16653	1.08907	0.151966	8.5142	8.49924	7.14932	6.44918	5.98751	6.12492	7.35348	7.2544
Gm4951	0.00383762	0.304485	24	22.5249	32.9125	0.0138889	0.278415	24	0	35.0052	0.130447	1	24	7.73643e-05	169.145	0.000579871	0.0431158	24	23.5111	141.927	33.3041	0.234656	171.969	135.346	133.875	115.738	111.29	121.467	168.107	177.625
Pus1	0.00392663	0.304485	24	10.5748	2.25497	0.0138889	0.278415	24	12	1.73868	0.127665	1	24	11.106	13.0859	0.000580542	0.0431158	24	11.2262	10.6951	2.2751	0.212724	8.70712	10.3994	10.6971	12.9273	13.6134	10.7186	10.0074	8.49034
Aamp	0.0157791	0.443614	24	11.3132	12.6515	0.0031746	0.18868	24	12	13.3227	0.138997	1	24	12.3294	107.013	0.000580562	0.0431158	24	11.8812	92.6937	13.6205	0.14694	81.9652	82.7328	95.3601	95.8123	109.116	106.587	87.3572	82.6196
2810021J22Rik	0.0145001	0.441005	24	22.9217	0.72698	0.0031746	0.18868	24	1.5	0.826774	0.151693	1	24	7.73643e-05	4.00568	0.000581977	0.0431158	24	0.137853	2.87682	0.777892	0.2704	3.88412	3.98001	2.71459	2.57389	1.75753	2.49657	2.5986	3.00923
Shpk	0.00386804	0.304485	24	10.6351	10.9416	0.0138889	0.278415	24	10.5	9.21305	0.130502	1	24	10.7639	58.0677	0.000583961	0.0431158	24	10.633	45.787	10.9502	0.239155	39.5357	40.6474	48.0832	55.9604	60.9177	45.9702	39.366	35.8153
Rpl10-ps3	0.01865	0.453111	24	11.5365	9.82879	0.0031746	0.18868	24	13.5	10.3363	0.119633	1	24	12.4341	68.9431	0.000589039	0.0431158	24	12.4896	56.4035	11.3527	0.201277	46.3522	48.6331	52.5179	62.0047	67.4414	70.137	53.5754	50.5659
Nadsyn1	0.00158661	0.268752	24	9.88267	4.99279	0.0440476	0.413932	24	12	4.97841	0.102059	1	24	9.11636	27.6674	0.000592514	0.0431158	24	10.3222	22.9665	4.96678	0.216262	17.4785	23.5462	26.474	27.2717	27.3757	23.1349	20.1806	18.2703
Setd4	0.00454475	0.319598	24	11.0763	1.71044	0.0138889	0.278415	24	13.5	1.74538	0.113014	1	24	12.2553	8.91723	0.000592589	0.0431158	24	12.2768	7.07082	1.87156	0.264688	4.81014	5.34091	6.71929	8.76279	8.31102	9.12081	7.18761	6.31402
Ccdc43	0.00372216	0.304485	24	21.6808	1.06405	0.0138889	0.278415	24	22.5	0.907942	0.138291	1	24	19.7517	10.0344	0.000593684	0.0431158	24	21.3189	9.5061	1.12715	0.118571	10.7778	9.83446	9.00384	8.24223	8.54933	9.55355	10.1732	9.91435
Acsm5	0.0161967	0.445928	24	9.74191	35.0945	0.0031746	0.18868	24	9	39.5462	0.140064	1	24	9.01536	170.233	0.000597377	0.0431158	24	9.25209	124.848	37.3049	0.298803	103.482	105.611	159.462	164.584	159.25	108.717	100.627	97.0478
Mamdc2	0.00393217	0.304485	24	10.6984	0.6432	0.0138889	0.278415	24	10.5	0.629281	0.132076	1	24	9.49358	3.25611	0.000598168	0.0431158	24	10.2317	2.54148	0.640457	0.252001	2.25073	2.00284	2.87585	3.23905	3.15759	2.62972	2.32215	1.8539
Dnmt3b	0.00149203	0.268752	24	22.7477	2.79288	0.0440476	0.413932	24	0	2.77095	0.112109	1	24	7.73643e-05	6.41474	0.000608993	0.0436638	24	23.5843	3.61681	2.87269	0.794259	6.10913	5.16117	2.01579	1.41708	1.75753	1.49794	4.31257	6.6633
Cpeb4	0.0174489	0.451538	24	23.3764	21.4714	0.0031746	0.18868	24	1.5	20.4935	0.134044	1	24	7.73643e-05	90.1781	0.000612991	0.0437192	24	0.288395	70.8802	24.0471	0.339264	89.3734	87.7655	74.5035	60.0092	44.0574	44.7719	82.4364	84.1242
Soat2	0.00465027	0.324824	24	10.0591	6.24072	0.0138889	0.278415	24	9	6.2126	0.118254	1	24	9.37264	30.708	0.000627782	0.0445397	24	9.4769	24.0834	6.46276	0.26835	19.6135	24.0341	28.2479	29.0936	32.1121	22.3693	19.5171	17.6792
Idi1	0.0151456	0.441005	24	22.8427	12.3366	0.0031746	0.18868	24	1.5	13.4538	0.160103	1	24	7.73643e-05	66.7421	0.000631961	0.0446026	24	0.111886	47.0706	13.0898	0.278089	64.3581	66.4276	42.9766	41.5582	29.1928	40.6442	42.1581	49.2493
Map10	0.00477278	0.328304	24	22.0635	0.215713	0.0138889	0.278415	24	22.5	0.209258	0.118945	1	24	20.9999	0.752198	0.000644878	0.0452784	24	21.8558	0.54806	0.219415	0.219415	0.655928	0.616259	0.430034	0.289201	0.327675	0.56589	0.774051	0.72544
Clint1	0.00537264	0.343741	24	23.2601	6.23171	0.0138889	0.278415	24	3	6.96457	0.109046	1	24	7.73643e-05	61.6733	0.000662254	0.0462588	24	0.722464	52.0291	7.19345	0.138258	60.9884	60.342	53.7812	47.2554	46.2319	43.5402	50.9215	53.1721
Slc34a2	0.00437815	0.317264	24	22.4062	2.58644	0.0138889	0.278415	24	0	2.02669	0.136999	1	24	20.9999	4.57742	0.000675519	0.0467781	24	22.467	2.28087	2.58624	1.13388	5.98052	3.10697	0.967577	0.318121	0.327675	1.13178	1.65868	4.75566
Acot7	0.16277	0.717765	24	12.9903	2.18466	0.000396825	0.173464	24	15	2.46192	0.129218	1	24	14.6961	17.3299	0.000676593	0.0467781	24	14.234	13.3749	3.74353	0.279893	11.2665	10.0912	11.4765	12.8694	16.0859	18.5079	14.1541	12.5474
Ackr3	0.0211903	0.463894	24	21.615	0.111539	0.0031746	0.18868	24	21	0.110807	0.125093	1	24	20.9999	0.593571	0.000681293	0.046864	24	21.2048	0.454467	0.119494	0.119494	0.475869	0.462194	0.349403	0.260281	0.417041	0.499314	0.580538	0.591099
Commd7	0.00170951	0.274431	24	22.5177	2.4211	0.0440476	0.413932	24	0	2.46377	0.116799	1	24	20.9999	14.5482	0.000707129	0.0481667	24	22.5062	12.798	2.42109	0.189177	14.9577	15.124	11.3959	10.7004	10.4856	11.7172	13.6288	14.3745
Trpc4ap	0.00423934	0.308857	24	10.9642	6.4539	0.0138889	0.278415	24	10.5	6.26198	0.149424	1	24	11.5663	75.5708	0.000707341	0.0481667	24	11.01	68.5932	6.52868	0.0951798	65.5542	67.0438	68.3217	76.2334	73.8162	72.8999	63.8315	61.0445
Gm19426	0.00138745	0.268752	24	22.6476	0.641435	0.0440476	0.413932	24	22.5	0.625469	0.145727	1	24	20.9999	2.10356	0.000714639	0.0484178	24	22.0525	1.16375	0.639346	0.549385	1.24755	1.36091	0.75256	0.578402	0.417041	1.19835	1.68632	2.06885
Abca6	0.00521884	0.338988	24	10.1372	60.13	0.0138889	0.278415	24	10.5	53.494	0.123851	1	24	9.16996	406.144	0.000719457	0.0484178	24	9.93672	335.993	60.9023	0.181261	295.695	326.874	364.132	407.658	401.521	311.139	311.196	269.729
Art2b	0.00130753	0.268459	24	22.608	0.107885	0.0440476	0.413932	24	3	0.110568	0.157135	1	24	7.73643e-05	0.448489	0.000724365	0.0484178	24	0.504225	0.232857	0.113364	0.113364	0.450146	0.333807	0.241894	0.173521	0.0893659	0.166438	0.165868	0.241813
Tex2	0.028216	0.49079	24	23.9012	17.7016	0.0031746	0.18868	24	3	23.3909	0.101482	1	24	1.35433	211.577	0.00072708	0.0484178	24	1.41669	189.938	23.6955	0.124754	208.675	214.176	202.627	173.897	172.357	168.602	179.248	199.926
Afap1l2	0.0017594	0.274431	24	22.6015	0.65216	0.0440476	0.413932	24	0	0.593046	0.117645	1	24	7.73643e-05	2.0562	0.000728893	0.0484178	24	23.5362	1.22085	0.663726	0.543657	2.08353	1.41226	1.23635	0.607322	0.685138	0.665753	1.43752	1.63896
Mustn1	0.0191048	0.453111	24	23.2813	0.576708	0.0031746	0.18868	24	0	0.455632	0.152394	1	24	6.70856e-05	2.31803	0.000737338	0.0486388	24	23.7608	1.84688	0.614124	0.33252	2.34076	2.13123	1.90828	1.67737	0.86387	1.49794	2.01806	2.33753
Dcun1d4	0.00655704	0.35151	24	9.64511	4.31737	0.0138889	0.278415	24	9	4.71423	0.102309	1	24	8.6877	30.0827	0.000742344	0.0486388	24	9.11065	24.7165	4.65862	0.188482	23.369	24.8044	30.0218	29.2961	28.2694	22.8353	19.7106	19.4257
Gpi1	0.0261655	0.482512	24	11.7959	33.9751	0.0031746	0.18868	24	15	41.3651	0.112593	1	24	12.3671	187.199	0.000744712	0.0486388	24	13.0341	140.859	42.7484	0.303484	109.771	107.101	115.948	165.192	183.617	184.014	138.306	122.922
Por	0.00625923	0.351388	24	11.3216	127.681	0.0138889	0.278415	24	13.5	126.291	0.108744	1	24	11.9165	363.702	0.000751476	0.0486388	24	12.2416	216.353	141.885	0.655805	125.334	74.4903	197.843	326.566	372.268	304.382	203.714	126.227
Slc26a6	0.00522829	0.338988	24	21.8778	0.619888	0.0138889	0.278415	24	22.5	0.507786	0.130536	1	24	20.9999	3.05566	0.000753169	0.0486388	24	21.7931	2.49492	0.633688	0.253991	3.30536	2.49071	2.04266	1.93765	2.02563	2.49657	2.57095	3.08984
Nr1d2	0.00189731	0.276812	24	10.3045	63.4804	0.0440476	0.413932	24	10.5	59.4375	0.113591	1	24	9.66678	138.057	0.000754115	0.0486388	24	10.1574	77.8023	63.7661	0.819592	25.3625	57.6202	110.707	154.375	108.133	113.777	35.2746	17.1688
Zfp93	0.0237506	0.481083	24	21.5725	0.469646	0.0031746	0.18868	24	21	0.511485	0.127084	1	24	20.2142	4.55228	0.00076006	0.0486388	24	20.9293	4.01585	0.51669	0.128663	4.15421	4.05704	3.60154	3.23905	3.72358	4.36068	4.42315	4.56759
Maf1	0.00499091	0.336477	24	10.1484	2.63252	0.0138889	0.278415	24	12	2.20286	0.138421	1	24	11.2429	16.9774	0.000760934	0.0486388	24	11.1315	14.7841	2.59145	0.175286	10.9836	15.0727	15.6694	17.1785	16.5625	16.2444	13.9606	12.6012
Fam149a	0.00616517	0.351388	24	23.1354	6.27104	0.0138889	0.278415	24	1.5	6.0517	0.113489	1	24	7.73643e-05	37.013	0.000769116	0.0488914	24	0.208386	28.688	6.85967	0.239113	36.822	32.7388	28.0866	24.8713	23.95	21.0711	27.9764	33.9882
Uck2	0.258878	0.779595	24	14.2497	1.47286	0.000396825	0.173464	24	16.5	2.92542	0.0953886	1	24	15.5281	15.2221	0.000774537	0.0488914	24	15.4274	12.1024	3.51189	0.290183	10.4434	8.83304	8.84258	12.2621	13.9411	15.1792	15.0387	12.2787
Wwc1	0.00507466	0.338988	24	22.5771	6.89087	0.0138889	0.278415	24	22.5	5.93053	0.139283	1	24	20.9999	61.7911	0.00077571	0.0488914	24	22.0288	52.426	6.88781	0.131382	58.1203	51.9712	50.5559	43.9875	49.33	48.6332	55.0129	61.7968
Pde9a	0.00176427	0.274431	24	22.3243	7.06951	0.0440476	0.413932	24	0	6.56031	0.131019	1	24	7.73643e-05	26.2779	0.00079989	0.050182	24	23.4455	17.6775	7.04205	0.398361	26.1214	21.7745	17.9539	9.37011	10.1579	15.2124	20.7059	20.1242
A930033H14Rik	0.00569934	0.346331	24	10.7668	2.64178	0.0138889	0.278415	24	12	2.53035	0.130157	1	24	10.6325	5.5686	0.000807888	0.0502496	24	11.1313	2.55848	2.67689	1.04628	0.553037	0.513549	2.36519	5.66834	5.80878	2.89602	2.01806	0.644836
Zfp62	0.00542843	0.343741	24	22.6316	4.50997	0.0138889	0.278415	24	0	4.14868	0.137076	1	24	7.73643e-05	29.7596	0.000809992	0.0502496	24	23.5461	23.5356	4.60016	0.195455	30.0441	25.0869	23.1143	21.372	18.1413	19.4067	25.4607	25.6591
Tmem177	0.00188321	0.276812	24	22.3448	1.01804	0.0440476	0.413932	24	0	0.921704	0.126668	1	24	20.9999	7.80953	0.000821336	0.0502496	24	22.4455	7.07457	1.01782	0.14387	8.35986	7.67756	6.61178	6.10214	6.16624	6.92383	6.85588	7.89924
Il17rc	0.0220841	0.47078	24	11.0959	2.82891	0.0031746	0.18868	24	13.5	3.12185	0.149955	1	24	13.3284	23.7258	0.000821723	0.0502496	24	12.6522	20.0655	3.18894	0.158926	14.7905	17.9485	19.4859	20.273	24.1288	23.9671	20.2359	19.6944
Imp4	0.00564654	0.346331	24	22.5029	1.26371	0.0138889	0.278415	24	0	1.07223	0.134361	1	24	20.9999	23.7721	0.000823301	0.0502496	24	22.501	22.5023	1.26371	0.0561591	23.8063	22.7502	22.4155	20.7646	21.8053	22.0031	22.641	23.8321
Rfxank	0.00203488	0.283444	24	22.5007	4.94776	0.0440476	0.413932	24	0	4.97394	0.117768	1	24	20.9999	16.0608	0.000824522	0.0502496	24	22.5002	11.9011	4.94776	0.415741	16.3596	15.8687	9.24574	6.59378	8.9068	8.72136	13.7947	15.7179
Gyg	0.0245962	0.482512	24	9.45603	0.803658	0.0031746	0.18868	24	9	0.733127	0.135654	1	24	8.45261	4.15912	0.000826924	0.0502496	24	8.96964	3.12569	0.884664	0.283029	2.52082	2.95291	4.03157	4.33802	3.30654	2.86274	2.70918	2.28379
Ift81	0.00599634	0.351388	24	23.3099	1.02059	0.0138889	0.278415	24	0	0.951568	0.129948	1	24	1.27388	3.62569	0.000841992	0.0507514	24	0.192424	2.99167	1.12834	0.377161	3.53686	3.6462	3.27901	1.96657	1.78732	2.39671	3.31736	4.00336
B4galt3	0.214672	0.765352	24	13.3464	0.465401	0.000396825	0.173464	24	15	0.616129	0.127755	1	24	14.9151	8.08739	0.000845961	0.0507514	24	14.4241	7.23746	0.853741	0.117961	6.93225	6.08556	6.9343	7.14326	7.80462	8.22204	7.65757	7.12006
Gatm	0.0175617	0.451538	24	23.2313	2.3536	0.0031746	0.18868	24	0	1.68737	0.195334	1	24	7.73643e-05	10.6855	0.000846419	0.0507514	24	23.7442	8.95355	2.49881	0.279086	10.662	9.34659	8.14378	7.40355	7.03011	7.68944	8.34869	13.0042
Asb13	0.0024623	0.284951	24	21.7736	7.91007	0.0440476	0.413932	24	22.5	8.01693	0.10136	1	24	20.9999	35.81	0.000853153	0.0509299	24	21.7579	29.0876	8.10647	0.278692	35.5744	30.1197	24.2969	18.7402	23.4139	29.5594	35.7722	35.2242
Hist4h4	0.00689065	0.358854	24	11.0664	0.787957	0.0138889	0.278415	24	13.5	0.817032	0.118855	1	24	11.6705	2.95345	0.000877944	0.0520636	24	12.072	2.04836	0.849182	0.414568	1.26041	1.18116	1.82765	2.86309	3.06823	2.36342	2.18393	1.63896
Klf10	0.110895	0.663756	24	9.47222	18.4663	0.000396825	0.173464	24	9	10.9692	0.259145	1	24	8.84326	50.3329	0.00087983	0.0520636	24	9.10504	23.921	20.0436	0.837907	13.5044	18.8473	33.0051	66.4873	23.4436	17.5759	10.2562	8.24852
Slc19a1	0.0209154	0.463112	24	11.0482	1.88403	0.0031746	0.18868	24	12	1.32753	0.174486	1	24	11.7228	6.67146	0.000891575	0.0525293	24	11.5907	4.35397	1.96654	0.451665	3.11244	3.44078	3.97782	5.72618	7.5961	4.56041	3.70439	2.71368
Chka	0.00590358	0.349506	24	22.8825	73.3822	0.0138889	0.278415	24	22.5	72.6922	0.142701	1	24	20.9999	168.1	0.000899007	0.0527377	24	22.1312	82.6206	72.4049	0.876354	114.44	151.009	36.5798	13.6503	23.2649	47.4349	108.809	165.777
Otud5	0.00655051	0.35151	24	9.8907	4.12926	0.0138889	0.278415	24	10.5	3.75168	0.129283	1	24	8.85932	33.8946	0.000902961	0.0527377	24	9.75109	29.6702	4.23092	0.142599	25.2082	28.9128	32.6289	35.1379	30.9206	30.558	28.3358	25.6591
Ppie	0.00228659	0.284951	24	10.7332	1.03467	0.0440476	0.413932	24	12	1.12045	0.117371	1	24	11.6611	8.03012	0.000906788	0.0527377	24	11.4657	6.96066	1.05879	0.15211	6.08341	6.52207	7.14932	7.95303	7.77483	7.85588	6.2477	6.09907
Rev1	0.02144	0.466147	24	10.5422	4.19559	0.0031746	0.18868	24	12	2.84663	0.179969	1	24	10.1861	23.6873	0.000934239	0.0537272	24	10.9061	18.6551	4.20738	0.225535	15.8066	15.92	17.8195	25.4786	22.5202	19.1737	16.6697	15.8522
Adck5	0.0337939	0.504682	24	23.7405	2.9583	0.0031746	0.18868	24	3	3.62032	0.114285	1	24	0.235212	23.5351	0.000934971	0.0537272	24	0.968962	19.3989	3.67315	0.189348	23.2404	23.6489	21.2867	17.2653	16.622	14.2804	18.9919	19.8556
Gpd2	0.00541469	0.343741	24	10.863	9.56521	0.0138889	0.278415	24	10.5	8.30059	0.163914	1	24	10.9852	49.0512	0.000939205	0.0537272	24	10.7828	38.2913	9.59725	0.250638	35.5873	35.7944	39.5363	47.4579	51.6237	38.0145	32.0125	26.3039
Hbp1	0.00658871	0.35151	24	10.2763	8.6383	0.0138889	0.278415	24	10.5	7.21777	0.135683	1	24	8.6823	88.7044	0.000944909	0.0537272	24	9.82364	80.8391	8.75436	0.108294	74.1713	82.0651	85.6037	92.0816	83.2592	84.6172	76.0781	68.8362
Setmar	0.0263418	0.482512	24	11.4093	0.749248	0.0031746	0.18868	24	12	0.62776	0.149118	1	24	12.0996	3.34702	0.000948326	0.0537272	24	11.8365	2.43636	0.806177	0.330894	1.762	1.92581	2.17705	2.80525	3.75337	2.6963	2.57095	1.80017
Per3	0.00647377	0.351388	24	10.3676	23.9976	0.0138889	0.278415	24	12	21.4591	0.138782	1	24	9.41542	54.6071	0.000948866	0.0537272	24	10.5899	26.2463	23.9656	0.913103	7.87113	8.06272	32.5213	60.2984	46.8575	26.0309	20.4294	7.89924
Ngef	0.00641144	0.351388	24	10.1011	10.0771	0.0138889	0.278415	24	12	7.99163	0.141206	1	24	9.40588	39.8723	0.000954962	0.0537272	24	10.4946	27.7854	10.0237	0.360753	18.8033	21.7488	30.6668	41.3847	38.0103	25.9644	23.9956	21.7095
Slc25a12	0.00230246	0.284951	24	10.2776	2.7886	0.0440476	0.413932	24	12	2.44701	0.12407	1	24	10.3737	18.3956	0.00095552	0.0537272	24	10.8798	15.7679	2.77177	0.175785	12.6041	14.6361	16.5563	19.2319	17.2178	17.5759	14.4305	13.8908
Abhd11	0.0334135	0.504601	24	11.9913	2.7074	0.0031746	0.18868	24	13.5	3.00804	0.119849	1	24	13.5121	24.6112	0.000963792	0.0537889	24	13.0041	21.0394	3.44549	0.163764	18.6361	18.6932	19.9428	21.6612	24.516	24.9657	21.0652	18.8346
Abhd8	0.0371596	0.512064	24	21.1021	1.51422	0.0031746	0.18868	24	19.5	2.23341	0.107869	1	24	19.2029	7.07746	0.000964556	0.0537889	24	19.9307	4.66504	1.93108	0.413946	4.66866	3.44078	3.01024	2.51605	3.51506	5.95849	7.57464	6.63643
Casp8ap2	0.00577012	0.347515	24	21.712	1.23303	0.0138889	0.278415	24	0	0.946066	0.161345	1	24	20.9999	12.8654	0.00097758	0.0542473	24	22.2236	12.1742	1.22615	0.100717	14.1089	12.1454	11.5572	11.1053	11.0218	12.1167	12.4954	12.843
Rnf141	0.0417428	0.524288	24	0.165814	6.44092	0.0031746	0.18868	24	3	8.13487	0.0982742	1	24	0.587344	63.4247	0.00098345	0.0542473	24	1.23606	55.3031	8.60127	0.15553	63.3034	62.5503	60.5273	51.9983	48.8235	44.6387	51.4467	59.1368
Kras	0.00210254	0.283444	24	21.7209	7.05563	0.0440476	0.413932	24	0	5.86916	0.140847	1	24	20.9999	29.1371	0.000984785	0.0542473	24	22.2267	25.7523	7.01716	0.272487	35.5873	27.5006	21.6361	19.4343	19.0349	24.9324	29.3586	28.534
Mmp14	0.0023998	0.284951	24	23.0967	3.9293	0.0440476	0.413932	24	0	3.76726	0.124223	1	24	7.73643e-05	20.2901	0.000990281	0.0543292	24	23.6996	17.4745	4.1372	0.236756	20.2823	18.6675	16.9326	15.0385	13.2559	14.1472	19.6554	21.8169
Hint2	0.0297998	0.496417	24	11.5589	6.6267	0.0031746	0.18868	24	13.5	6.3677	0.142316	1	24	13.1332	45.655	0.00101123	0.0552549	24	12.7349	37.3283	7.87776	0.21104	29.5939	34.6902	35.451	38.3191	46.6192	45.5375	36.6845	31.7313
Mecom	0.00517033	0.338988	24	23.0533	0.895117	0.0138889	0.278415	24	22.5	0.832566	0.188751	1	24	7.73643e-05	3.42041	0.00101694	0.0553435	24	23.1836	3.1946	0.913421	0.285927	3.39539	3.28671	3.03712	2.34253	2.41288	2.52986	4.11906	4.43325
Fbxo31	0.00798848	0.367326	24	11.0352	7.86682	0.0138889	0.278415	24	13.5	7.5078	0.123871	1	24	11.6076	38.1496	0.00102883	0.0557665	24	12.04	28.9703	8.44121	0.291375	21.7099	20.5933	27.4416	36.2658	40.1848	31.4901	29.331	24.7456
Ogdh	0.00852156	0.374921	24	11.5468	15.1658	0.0138889	0.278415	24	12	15.7394	0.11711	1	24	12.1793	194.36	0.00103615	0.0559396	24	11.9088	177.888	16.4916	0.0927078	166.528	168.033	172.551	191.393	193.656	189.54	180.464	160.94
St6galnac6	0.00211096	0.283444	24	22.8932	5.77498	0.0440476	0.413932	24	22.5	5.66517	0.150942	1	24	7.73643e-05	38.274	0.00104705	0.0562263	24	23.1296	35.8189	5.86664	0.163786	37.9666	36.8215	34.2952	29.5563	31.844	31.823	40.6377	43.607
Fahd1	0.00864891	0.376853	24	21.7508	7.28975	0.0138889	0.278415	24	22.5	7.0228	0.117199	1	24	20.9999	40.9974	0.00104976	0.0562263	24	21.7502	33.2598	7.47464	0.224735	40.346	29.8629	30.2905	23.8012	28.2396	33.8535	38.979	40.7053
Cldn1	0.00771486	0.367326	24	22.9325	40.6368	0.0138889	0.278415	24	0	39.2139	0.133059	1	24	0.401268	98.9294	0.00106091	0.0563389	24	23.7793	67.5199	42.638	0.631488	94.6722	102.325	73.0521	22.095	21.0903	44.3391	90.5086	92.0772
Rad23a	0.00722282	0.365211	24	10.5656	4.62514	0.0138889	0.278415	24	10.5	3.94581	0.14215	1	24	11.3818	34.9578	0.00106108	0.0563389	24	10.8153	30.1576	4.63576	0.153718	26.5972	28.6304	32.5482	32.2459	36.9975	31.2238	27.0365	25.9815
Akr1c19	0.0359083	0.507372	24	11.7933	28.4857	0.0031746	0.18868	24	13.5	29.8789	0.125553	1	24	12.3907	114.585	0.00106433	0.0563389	24	12.5599	75.7045	33.692	0.445046	52.7572	40.1852	64.4514	84.7359	122.401	106.62	72.0697	62.4147
Dhrs9	0.00307052	0.295097	24	23.1306	4.0564	0.0440476	0.413932	24	0	4.44272	0.10669	1	24	7.73643e-05	8.41231	0.00107163	0.0565045	24	23.7108	4.69255	4.28012	0.91211	7.72966	9.03846	3.92406	1.24356	0.774504	1.59781	5.25249	7.97984
Dbp	0.0273353	0.488037	24	9.64509	46.6949	0.0031746	0.18868	24	10.5	38.9269	0.167323	1	24	8.99088	96.7292	0.00107724	0.05658	24	9.71155	34.1176	47.999	1.40687	2.19929	6.44504	68.9936	112.326	55.943	21.0045	4.22963	1.80017
Rnh1	0.0298059	0.496417	24	11.3495	14.9859	0.0031746	0.18868	24	13.5	11.4741	0.154467	1	24	12.2978	83.2464	0.00108319	0.0566728	24	12.3813	63.7362	16.8998	0.265152	48.0499	54.9241	60.6886	67.8176	85.1359	82.52	55.5934	55.1603
Cdc40	0.0283865	0.49079	24	9.98248	1.2817	0.0031746	0.18868	24	9	1.07853	0.163663	1	24	8.75094	20.0794	0.0010914	0.0568829	24	9.24345	18.3967	1.34938	0.0733488	18.1345	18.231	19.4053	20.7646	18.5881	18.1085	17.4714	16.4702
Hist1h4n	0.00959892	0.394167	24	11.3128	0.5553	0.0138889	0.278415	24	13.5	0.607226	0.111411	1	24	12.5836	2.71507	0.00109786	0.056914	24	12.4671	2.13265	0.629435	0.295142	1.47905	1.592	1.98891	2.68957	2.50224	2.79616	2.26686	1.74643
Atp5g2	0.0284717	0.49079	24	11.3458	6.57839	0.0031746	0.18868	24	12	5.54858	0.164783	1	24	12.0648	48.629	0.0011004	0.056914	24	11.8038	40.1834	7.04448	0.175308	35.0857	35.5633	39.5632	41.8474	51.713	44.9383	37.2097	35.5466
Lonrf3	0.0482585	0.534374	24	20.6666	4.35488	0.0031746	0.18868	24	19.5	5.59831	0.0979103	1	24	19.3265	13.9898	0.00110693	0.0570343	24	19.8294	8.95035	5.81773	0.650001	11.781	6.72749	1.98891	3.38365	8.19187	11.7505	14.2646	13.5147
Bank1	0.00892266	0.378806	24	23.4441	0.984588	0.0138889	0.278415	24	1.5	0.965805	0.121864	1	24	7.73643e-05	5.09273	0.00111323	0.0571415	24	0.310941	4.15505	1.10977	0.267089	5.04164	4.77601	4.00469	3.67285	3.21717	3.2289	3.92554	5.37363
Nrip1	0.00769124	0.367326	24	22.307	7.28118	0.0138889	0.278415	24	0	7.54302	0.142309	1	24	7.73643e-05	34.4464	0.00111936	0.0572396	24	23.4399	26.9655	7.24273	0.268592	34.4684	28.4506	24.2701	21.2274	20.1371	21.5371	34.2517	31.382
Zfp266	0.00609133	0.351388	24	22.0338	3.64646	0.0138889	0.278415	24	0	2.79259	0.182836	1	24	20.9999	36.9189	0.00113574	0.0578585	24	22.3364	35.0393	3.63937	0.103865	41.4263	36.2309	33.3008	32.217	31.8142	34.2197	33.92	37.1855
Gfod1	0.00287244	0.288329	24	22.3373	2.7562	0.0440476	0.413932	24	22.5	3.00642	0.124581	1	24	20.9999	8.57995	0.00115375	0.0583722	24	21.9481	5.04653	2.77938	0.550751	6.59786	5.28956	3.06399	2.83417	2.68098	3.66164	8.21047	8.03358
Hist2h2ab	0.0078844	0.367326	24	9.61551	0.218389	0.0138889	0.278415	24	10.5	0.1825	0.144485	1	24	9.04318	0.644838	0.00115738	0.0583722	24	9.71893	0.385764	0.224325	0.224325	0.154336	0.282452	0.537543	0.694082	0.506407	0.366164	0.276447	0.268682
Ubqln1	0.00227155	0.284951	24	21.8573	19.7663	0.0440476	0.413932	24	0	17.1467	0.158352	1	24	20.9999	129.914	0.00115874	0.0583722	24	22.2745	122.376	19.6931	0.160923	152.883	126.538	117.964	101.943	103.784	117.339	130.234	128.322
Gjc3	0.00844205	0.374636	24	21.9993	0.225403	0.0138889	0.278415	24	21	0.26001	0.138203	1	24	20.9999	1.28964	0.00118071	0.0590516	24	21.3322	0.871748	0.235872	0.235872	0.913154	0.796001	0.537543	0.723003	0.714927	0.865478	1.16108	1.2628
Efhd2	0.0359151	0.507372	24	11.7062	10.7701	0.0031746	0.18868	24	15	12.6959	0.142811	1	24	12.1439	40.5902	0.00118547	0.0590516	24	12.9252	25.8784	13.2596	0.512383	18.5203	14.97	18.7065	35.5139	38.6358	38.8467	22.0052	19.8287
Micalcl	0.00813207	0.367326	24	22.4557	0.5895	0.0138889	0.278415	24	22.5	0.527872	0.145456	1	24	20.9999	1.68611	0.00119432	0.0590516	24	21.988	0.863013	0.591963	0.591963	1.41475	0.873033	0.456911	0.289201	0.65535	0.499314	1.02285	1.69269
Tarbp2	0.00819519	0.368947	24	10.7925	1.22897	0.0138889	0.278415	24	12	1.24076	0.144543	1	24	11.882	8.41592	0.00119575	0.0590516	24	11.5594	7.01676	1.26601	0.180427	5.86476	6.95859	7.06869	7.75059	8.54933	7.92246	6.08183	5.93786
Gpatch11	0.00808572	0.367326	24	22.4002	1.46415	0.0138889	0.278415	24	0	1.2155	0.14654	1	24	20.9999	9.0282	0.00119603	0.0590516	24	22.4649	7.71713	1.46402	0.18971	9.50452	8.11408	7.22995	6.39134	6.16624	7.78931	7.32584	9.21578
Arhgef19	0.0267658	0.483605	24	22.616	8.71331	0.0031746	0.18868	24	22.5	6.42105	0.194844	1	24	20.9999	34.5768	0.00120205	0.0590516	24	22.0418	26.2626	8.69604	0.331119	31.3173	30.6589	27.3072	10.9607	21.7159	22.8686	30.9344	34.3375
Zfp518a	0.00285735	0.288329	24	22.109	4.81809	0.0440476	0.413932	24	22.5	4.75616	0.131633	1	24	20.9999	18.4329	0.00120273	0.0590516	24	21.8712	15.8518	4.89424	0.30875	20.8997	18.4878	14.1105	10.9318	10.9622	14.114	19.683	17.6255
Leprotl1	0.00747611	0.367326	24	22.898	2.67327	0.0138889	0.278415	24	22.5	2.23849	0.160972	1	24	7.73643e-05	13.636	0.00121165	0.0592744	24	23.1312	11.8949	2.71609	0.228342	13.5558	12.2738	11.5572	8.47359	10.6941	10.0862	12.8271	15.691
Etnk2	0.00310127	0.295953	24	10.4918	77.884	0.0440476	0.413932	24	12	76.0197	0.123154	1	24	11.5436	308.449	0.00121822	0.0593816	24	11.3464	229.818	78.406	0.341166	155.378	192.966	270.223	275.782	315.402	281.68	170.429	176.685
Trim24	0.0033091	0.302264	24	11.1816	4.86214	0.0440476	0.413932	24	12	5.03118	0.115976	1	24	11.7539	22.6908	0.00122312	0.059407	24	11.6454	17.4115	5.11668	0.293868	14.3275	13.9172	16.9595	22.5577	21.7457	21.2375	15.7575	12.7892
Dgat1	0.0277277	0.4887	24	10.4503	2.64004	0.0031746	0.18868	24	12	1.77466	0.198403	1	24	11.7208	19.9066	0.00125682	0.0608258	24	11.3925	16.765	2.65262	0.158223	13.5558	16.3309	16.5563	18.3643	21.3882	16.9101	15.6192	15.3955
Tek	0.00890016	0.378806	24	23.2583	2.65018	0.0138889	0.278415	24	0	2.29517	0.143164	1	24	7.73643e-05	20.0598	0.00127077	0.0610735	24	23.7531	17.7362	2.81826	0.158899	20.128	18.3851	17.1207	16.8026	14.8347	15.4787	17.9137	21.2258
Ccdc66	0.0487898	0.535749	24	23.9407	1.36209	0.0031746	0.18868	24	3	1.71664	0.114277	1	24	2.06648	5.86927	0.00127096	0.0610735	24	1.67998	3.9993	1.89885	0.474795	5.46606	6.23962	5.13354	3.00769	2.32351	1.89739	3.84261	4.08396
Heatr5a	0.0461311	0.532927	24	21.0217	2.04698	0.0031746	0.18868	24	19.5	2.72815	0.121453	1	24	20.9999	29.6443	0.00127612	0.0611052	24	20.5102	27.1728	2.41819	0.088993	29.1309	25.6004	24.5926	24.7556	27.0183	27.2293	29.6074	29.4475
BC025446	0.0578429	0.560385	24	12.3644	9.93476	0.0031746	0.18868	24	15	14.299	0.0974895	1	24	13.7967	90.0714	0.00128302	0.0612189	24	13.7219	75.848	14.6183	0.192732	64.7954	61.5489	65.9565	80.1665	90.9149	87.2136	85.2562	70.9319
Zfp385a	0.00352732	0.303446	24	22.8815	0.539841	0.0440476	0.413932	24	0	0.511434	0.116233	1	24	7.73643e-05	2.54663	0.0012924	0.0614503	24	23.6284	1.91182	0.560447	0.293149	2.53368	2.20826	1.98891	1.27248	1.54901	1.49794	1.87984	2.3644
Il34	0.0450377	0.530695	24	11.9675	0.423335	0.0031746	0.18868	24	13.5	0.432424	0.127025	1	24	13.9582	1.83942	0.00129852	0.0615252	24	13.1459	1.25759	0.548937	0.436498	0.797402	0.924388	1.07509	1.33032	1.75753	1.96397	1.27165	0.940385
Kcnk10	0.0087753	0.377505	24	11.392	0.620963	0.0138889	0.278415	24	12	0.47719	0.150126	1	24	12.094	2.27386	0.00130659	0.0616921	24	11.8289	1.6666	0.667351	0.400425	1.22183	1.48929	1.66638	2.02441	2.41288	1.99726	1.74161	0.779177
Pacsin2	0.328667	0.788912	24	6.51009	2.69883	0.000396825	0.173464	24	6	3.73689	0.142086	1	24	5.88398	55.8867	0.00132051	0.0620792	24	6.13121	49.9705	5.8225	0.116519	49.3489	52.3563	58.189	52.0273	48.8533	45.5042	45.3373	48.1477
Ints3	0.0105421	0.407555	24	21.8894	2.25132	0.0138889	0.278415	24	21	2.53123	0.126961	1	24	20.9999	26.7624	0.00132395	0.0620792	24	21.2959	23.6596	2.37251	0.100277	24.5394	22.5962	22.1199	21.343	21.5372	23.6342	27.23	26.2771
Celsr1	0.00341236	0.302264	24	22.4994	14.9032	0.0440476	0.413932	24	22.5	14.532	0.124541	1	24	20.9999	36.1526	0.00133165	0.062225	24	22.0027	22.1515	14.9412	0.6745	33.0407	30.89	16.4219	4.42478	12.9283	12.1833	33.1736	34.1494
Akirin2	0.0089453	0.378806	24	22.7064	1.42181	0.0138889	0.278415	24	1.5	1.1261	0.153563	1	24	7.73643e-05	15.1993	0.00135291	0.063001	24	0.0672549	13.0401	1.48633	0.113981	14.9577	14.8929	12.471	12.32	11.4686	11.5841	13.4077	13.2191
Lsm2	0.0097896	0.398375	24	10.2416	0.639541	0.0138889	0.278415	24	10.5	0.553907	0.143241	1	24	9.12694	5.31018	0.00137633	0.063872	24	9.95768	4.64169	0.646189	0.139214	4.20565	4.39084	5.02603	5.58158	4.79597	4.92657	4.25728	3.94962
1810011H11Rik	0.037523	0.512574	24	21.8198	0.125566	0.0031746	0.18868	24	19.5	0.137534	0.165912	1	24	20.9999	0.974556	0.00139322	0.064435	24	20.7768	0.723123	0.137968	0.137968	0.68165	0.667614	0.537543	0.578402	0.685138	0.69904	0.995208	0.940385
Pcsk4	0.00966067	0.395305	24	10.4763	7.25081	0.0138889	0.278415	24	12	5.51148	0.148582	1	24	10.0801	17.0125	0.00140333	0.0644407	24	10.8483	8.41501	7.25558	0.862219	3.49828	3.92865	8.27816	18.7113	16.1752	8.58821	4.75488	3.38539
Hoga1	0.00333583	0.302264	24	10.5126	23.867	0.0440476	0.413932	24	10.5	23.511	0.135801	1	24	11.0417	129.916	0.00140438	0.0644407	24	10.6846	105.613	23.879	0.226098	94.5565	101.195	121.162	120.597	135.27	111.913	81.2753	78.9386
Apeh	0.0037866	0.304485	24	11.0492	6.72512	0.0440476	0.413932	24	12	6.57955	0.119965	1	24	11.8914	50.7603	0.0014076	0.0644407	24	11.6475	42.8306	7.04391	0.16446	37.6708	39.5433	42.4928	47.5736	51.2662	47.9675	38.7302	37.4005
Tmem125	0.0118509	0.4276	24	21.6804	0.52258	0.0138889	0.278415	24	21	0.470051	0.123365	1	24	20.6113	5.22888	0.00142492	0.0650138	24	21.0969	4.76418	0.563779	0.118337	5.15739	4.75033	4.51536	3.93313	4.49808	4.79342	5.28013	5.18555
Csrnp1	0.011782	0.4276	24	9.73671	3.38467	0.0138889	0.278415	24	10.5	3.25604	0.125084	1	24	8.5816	11.4223	0.00143444	0.0652286	24	9.60749	7.53824	3.50493	0.464953	5.10595	6.2653	12.041	10.9318	9.26426	7.35657	5.41835	3.92275
Ppif	0.0113361	0.416302	24	11.4342	5.56228	0.0138889	0.278415	24	12	5.04749	0.131083	1	24	12.1647	27.9985	0.00144433	0.0653857	24	11.8665	21.2459	6.00557	0.28267	16.8741	18.3337	20.3191	23.4831	29.2226	26.2639	19.296	16.1746
Flot1	0.00396017	0.30491	24	9.83034	2.81433	0.0440476	0.413932	24	10.5	2.77104	0.118632	1	24	9.48974	14.8983	0.00144755	0.0653857	24	9.93971	11.9053	2.85281	0.239625	9.29874	11.1183	13.4923	15.2698	14.0304	12.4829	9.20567	10.3442
Slc4a1	0.00404584	0.30557	24	22.0819	0.18601	0.0440476	0.413932	24	21	0.190712	0.116847	1	24	20.9999	0.753675	0.00145508	0.0655075	24	21.3595	0.531094	0.193587	0.193587	0.68165	0.487872	0.403157	0.404881	0.327675	0.499314	0.718761	0.72544
Slc41a2	0.00416746	0.30557	24	23.4545	20.2311	0.0440476	0.413932	24	0	19.6791	0.113998	1	24	0.658484	58.2294	0.00146106	0.0655589	24	0.0375009	44.6757	22.2126	0.497198	56.9757	58.8014	47.7338	30.0769	20.1669	29.5261	48.3782	65.7464
Azin1	0.00343511	0.302264	24	10.7974	27.6209	0.0440476	0.413932	24	10.5	26.8833	0.139186	1	24	9.8295	141.269	0.00146882	0.0656896	24	10.376	110.505	27.4718	0.248601	102.183	90.7184	121.108	140.61	140.066	114.177	95.6506	79.5297
C5ar1	0.0102858	0.407555	24	22.2161	0.209539	0.0138889	0.278415	24	22.5	0.1588	0.149259	1	24	20.9999	0.946814	0.00148404	0.0661523	24	21.9073	0.620389	0.212151	0.212151	0.733096	0.513549	0.537543	0.347041	0.446829	0.69904	0.718761	0.967254
Ncln	0.00929671	0.38763	24	10.3095	4.30933	0.0138889	0.278415	24	12	3.82703	0.165852	1	24	11.1461	43.3765	0.00148936	0.0661717	24	11.1518	38.3235	4.28536	0.111821	33.1179	35.9741	37.6011	43.2066	44.2063	38.5804	36.8503	37.0512
Tomm40	0.0106182	0.407555	24	10.9571	4.06456	0.0138889	0.278415	24	12	2.92977	0.147353	1	24	11.8275	26.796	0.00150761	0.0665894	24	11.5955	21.9741	4.22795	0.192407	18.5718	20.7987	21.448	24.5242	28.5077	23.1349	20.4294	18.3778
Wipi2	0.00368464	0.304485	24	10.7855	12.3148	0.0440476	0.413932	24	12	13.6368	0.134	1	24	11.7685	83.6344	0.00150859	0.0665894	24	11.519	70.4835	12.6606	0.179625	61.1427	69.5859	72.2995	80.2822	82.4251	80.1566	60.1824	57.7934
Crot	0.0160485	0.445683	24	23.6942	155.051	0.0138889	0.278415	24	3	191.821	0.0986043	1	24	7.73643e-05	702.967	0.00152186	0.0666085	24	0.870574	476.156	189.414	0.397798	700.544	637.623	564.071	374.747	333.513	253.119	383.708	561.921
Psmd9	0.0505705	0.541803	24	11.8414	3.9953	0.0031746	0.18868	24	15	4.38829	0.136993	1	24	12.5895	32.322	0.00152269	0.0666085	24	13.1276	26.8536	5.11074	0.190319	23.2533	22.1853	24.7807	29.0069	31.3078	33.5206	25.599	25.1755
Nfkbia	0.010454	0.407555	24	10.6725	5.90966	0.0138889	0.278415	24	12	6.1335	0.151602	1	24	11.5873	34.2679	0.00152377	0.0666085	24	11.4208	26.8888	6.01973	0.223875	20.8997	21.0042	25.8558	33.0846	34.8229	29.626	24.0509	25.7666
March5	0.0038035	0.304485	24	11.162	10.3901	0.0440476	0.413932	24	12	10.6295	0.131968	1	24	11.5846	70.1219	0.00152937	0.0666383	24	11.5822	59.2373	10.8802	0.183671	54.6221	51.1752	61.468	68.425	68.9011	67.3409	53.6307	48.3358
Tcf25	0.00449328	0.319598	24	11.0506	13.035	0.0440476	0.413932	24	12	14.0401	0.112799	1	24	10.7752	139.06	0.00154175	0.0666731	24	11.2743	126.202	13.365	0.105902	114.865	110.747	128.527	139.106	137.147	135.78	126.834	116.608
Osbpl1a	0.0106662	0.407555	24	10.4039	15.7391	0.0138889	0.278415	24	10.5	15.2046	0.150986	1	24	9.19107	123.169	0.00154418	0.0666731	24	10.0333	103.921	15.8178	0.152211	96.5628	90.8212	113.932	124.877	116.056	102.859	98.7191	87.5365
Tnfaip2	0.0105084	0.407555	24	23.1922	16.2848	0.0138889	0.278415	24	0	15.3075	0.153685	1	24	1.10427	41.5714	0.0015478	0.0666731	24	0.0977763	32.2009	17.732	0.55067	37.6708	49.3521	28.0329	16.7447	14.09	26.2972	35.5787	49.8404
Tmem55b	0.0113125	0.416302	24	9.55381	1.29478	0.0138889	0.278415	24	10.5	1.1725	0.142989	1	24	8.57129	16.3616	0.00154985	0.0666731	24	9.54183	14.9232	1.34882	0.0903836	13.4401	14.5848	16.1263	16.6291	15.3113	14.9461	14.4305	13.9177
Hist1h4h	0.0607058	0.566318	24	11.9954	4.30234	0.0031746	0.18868	24	15	5.46685	0.119013	1	24	13.3366	40.1977	0.0015767	0.0676136	24	13.4411	33.9956	5.83743	0.171711	29.1052	26.3707	31.8763	35.3114	39.5295	41.6095	34.3623	33.8001
Stx17	0.0108712	0.409211	24	10.5464	1.87896	0.0138889	0.278415	24	10.5	1.4314	0.152567	1	24	10.0334	23.5074	0.00158241	0.0676443	24	10.36	21.2491	1.87836	0.0883972	20.1666	19.9514	21.3405	23.7434	23.4734	21.1709	20.2912	19.8556
Vwa7	0.0105448	0.407555	24	23.3966	0.172796	0.0138889	0.278415	24	1.5	0.147013	0.159114	1	24	7.73643e-05	0.516143	0.00159762	0.0680798	24	0.295131	0.392149	0.193898	0.193898	0.527314	0.410839	0.403157	0.289201	0.20852	0.266301	0.387025	0.644836
Klhl21	0.0125491	0.431606	24	9.6681	9.44898	0.0138889	0.278415	24	10.5	8.9943	0.135165	1	24	9.01198	33.2463	0.00161213	0.0684828	24	9.72632	21.0435	9.70325	0.461104	13.723	17.3323	27.5491	34.6752	28.3886	16.8435	15.7575	14.0789
Hmg20b	0.278754	0.788178	24	13.1653	2.35634	0.000396825	0.173464	24	15	2.30148	0.214506	1	24	14.8117	19.872	0.00162176	0.0686763	24	14.3301	15.4992	4.1784	0.269587	13.8902	11.2724	14.2986	14.7782	17.4561	22.1696	15.6469	14.4819
Tor3a	0.0118216	0.4276	24	22.1984	2.62848	0.0138889	0.278415	24	22.5	2.26911	0.147253	1	24	20.9999	10.2012	0.00164719	0.0694136	24	21.9013	6.316	2.66273	0.421584	8.43703	5.54633	4.43473	3.67285	4.31935	6.92383	6.63472	10.5592
Gys1	0.0475578	0.534374	24	21.6297	0.456705	0.0031746	0.18868	24	21	0.396652	0.160399	1	24	20.9999	3.75461	0.00164941	0.0694136	24	21.2097	3.07042	0.488867	0.159218	3.30536	3.08129	2.25768	2.74741	2.77034	3.29548	3.31736	3.78841
Smap2	0.417906	0.788912	24	2.97486	0.895645	0.000396825	0.173464	24	4.5	1.38652	0.147302	1	24	3.88513	18.0503	0.00166133	0.0696988	24	3.78732	15.9412	2.35307	0.147609	16.0252	19.0783	17.4164	15.7904	15.222	14.0141	14.2923	15.691
Ric8b	0.0032702	0.302264	24	21.8867	1.50123	0.0440476	0.413932	24	0	1.19649	0.170419	1	24	20.9999	11.842	0.0016681	0.0697668	24	22.2848	11.1586	1.49617	0.134083	13.5687	11.8373	10.0521	10.2088	9.88982	10.3857	11.6384	11.6876
Neu3	0.00455187	0.319598	24	22.2116	0.752461	0.0440476	0.413932	24	22.5	0.730686	0.125441	1	24	20.9999	3.35843	0.00170198	0.0709648	24	21.9058	2.39565	0.761945	0.318054	2.97097	2.13123	2.17705	1.47493	1.90647	2.13041	3.0962	3.27792
Dusp4	0.0704953	0.591506	24	8.54182	0.819424	0.0031746	0.18868	24	7.5	1.0278	0.114698	1	24	7.27742	3.44495	0.00173098	0.0719527	24	7.77188	2.29011	1.11355	0.486241	1.81345	2.49071	3.65529	3.23905	2.6214	1.73096	1.0505	1.71956
Ubl7	0.0140771	0.438527	24	9.55274	1.94501	0.0138889	0.278415	24	10.5	1.69905	0.132252	1	24	8.92169	14.6896	0.00174151	0.0721688	24	9.65739	12.3635	2.00676	0.162314	10.482	12.4792	13.3042	15.3855	13.5538	11.6507	11.2514	10.801
Tob2	0.0392288	0.51547	24	10.1204	9.78819	0.0031746	0.18868	24	10.5	5.51685	0.210312	1	24	9.31845	39.4338	0.00176012	0.0723661	24	9.98017	27.9943	9.9001	0.353647	19.5364	26.7816	26.9847	46.4457	33.3037	27.2293	24.355	19.3182
BC005561	0.0150945	0.441005	24	23.2579	3.02378	0.0138889	0.278415	24	1.5	2.96019	0.12497	1	24	7.73643e-05	24.9713	0.00176057	0.0723661	24	0.24899	20.3521	3.34803	0.164505	24.7966	23.7003	20.1847	19.9838	16.3242	16.3109	20.2635	21.2527
Dgat2	0.0146294	0.441005	24	11.2818	121.281	0.0138889	0.278415	24	13.5	114.624	0.129095	1	24	11.9724	579.114	0.00176229	0.0723661	24	12.2475	423.838	134.489	0.317312	322.536	314.703	373.754	518.913	616.863	480.54	411.049	352.349
Auh	0.00411273	0.30557	24	11.0226	6.35669	0.0440476	0.413932	24	10.5	6.47386	0.146693	1	24	11.401	35.6093	0.0017814	0.0729299	24	10.9747	28.9483	6.42033	0.221786	26.5072	25.5234	29.9143	36.0344	33.8399	33.6205	24.4102	21.7363
Rps13	0.253329	0.777665	24	12.8852	10.5227	0.000396825	0.173464	24	15	5.92362	0.266168	1	24	14.4792	94.3522	0.00179155	0.072982	24	14.126	75.829	17.4905	0.230656	67.8821	65.0923	68.8055	71.8375	87.9062	103.558	72.0697	69.4811
Proser2	0.0143707	0.441005	24	21.9035	3.61826	0.0138889	0.278415	24	21	3.38092	0.134337	1	24	20.9999	22.0836	0.00179463	0.072982	24	21.3005	17.6575	3.80965	0.215752	18.6361	19.3094	13.4655	12.8405	16.0859	17.709	21.397	21.8169
Plin2	0.00480967	0.329171	24	22.9361	73.6173	0.0440476	0.413932	24	0	67.2051	0.126921	1	24	7.73643e-05	323.362	0.00179883	0.072982	24	23.6464	261.319	76.7084	0.293543	320.633	295.188	272.05	166.782	210.725	209.246	282.197	333.729
Rpusd4	0.0122546	0.4276	24	22.4224	0.541408	0.0138889	0.278415	24	0	0.396536	0.159964	1	24	7.73643e-05	5.30887	0.00181749	0.0734135	24	23.4775	4.7094	0.543532	0.115414	5.33745	4.85304	4.64975	4.28017	3.90231	4.79342	4.72724	5.13182
Atp1a1	0.0139768	0.438527	24	10.9949	61.1015	0.0138889	0.278415	24	13.5	59.1149	0.140966	1	24	11.4605	360.873	0.00182513	0.0734135	24	11.9758	288.237	65.1103	0.225892	231.105	227.323	267.643	354.589	374.89	300.887	293.752	255.704
Tab2	0.00474163	0.327826	24	23.3964	11.1609	0.0440476	0.413932	24	0	10.2169	0.131294	1	24	0.442548	46.0456	0.0018283	0.0734135	24	23.9465	39.6866	12.1229	0.305467	45.1433	47.2208	39.1062	32.7086	26.3033	30.7578	44.3973	51.8555
Anp32a	0.0148496	0.441005	24	23.1216	17.7033	0.0138889	0.278415	24	1.5	19.495	0.133711	1	24	7.73643e-05	80.3611	0.00183686	0.0734135	24	0.203815	59.761	19.3381	0.32359	80.3962	74.0538	68.8324	43.9875	38.8444	40.0117	67.3977	64.5642
Gpt2	0.0156153	0.441005	24	11.3041	125.561	0.0138889	0.278415	24	13.5	116.2	0.127225	1	24	12.02	628.608	0.0018377	0.0734135	24	12.2712	462.909	139.736	0.301865	351.191	344.617	407.028	554.109	665.09	537.695	441.43	402.109
Gpcpd1	0.0441035	0.529901	24	9.67614	115.588	0.0031746	0.18868	24	10.5	89.4659	0.197627	1	24	9.04089	280.004	0.00184197	0.0734135	24	9.73862	120.613	118.596	0.983277	42.2495	73.078	163.762	339.088	188.8	66.9081	49.4287	41.5919
Fastk	0.013299	0.438527	24	10.2072	4.99337	0.0138889	0.278415	24	10.5	4.29135	0.152953	1	24	10.3063	27.662	0.00187395	0.0743504	24	10.3378	21.8687	4.9963	0.228468	18.3274	21.1839	21.6899	29.2961	26.8693	21.6702	17.8308	18.0823
Naaladl2	0.0123916	0.429049	24	11.236	6.52562	0.0138889	0.278415	24	12	5.65366	0.165018	1	24	11.6523	25.3315	0.0018821	0.0743504	24	11.6295	17.6448	6.87042	0.389373	14.5847	14.5848	15.6694	24.1772	26.78	19.0405	15.951	10.3711
Rnd1	0.0161081	0.445928	24	21.6873	2.36272	0.0138889	0.278415	24	21	2.28133	0.127345	1	24	19.8426	9.10628	0.00188701	0.0743504	24	20.8449	6.80463	2.60404	0.382686	8.1155	6.77885	5.2948	3.75961	4.88533	6.85725	10.2285	8.51721
Tmpo	0.0130909	0.436442	24	22.0353	5.45798	0.0138889	0.278415	24	0	3.86746	0.156737	1	24	20.9999	49.7071	0.00188743	0.0743504	24	22.3369	45.5657	5.44743	0.119551	50.8408	47.2465	44.4279	36.6128	42.3594	46.0701	46.8854	50.0822
Clcn2	0.0137619	0.438527	24	10.8555	7.84246	0.0138889	0.278415	24	12	6.62324	0.150327	1	24	11.9976	48.7435	0.00190032	0.0746412	24	11.619	40.0701	8.12706	0.202821	31.0858	36.539	42.2509	41.5582	51.8918	45.8371	36.6845	34.7137
Sft2d2	0.0179668	0.451707	24	9.36391	4.38231	0.0138889	0.278415	24	9	4.75125	0.117166	1	24	7.66519	63.2685	0.00192785	0.0753583	24	8.67897	58.335	4.99625	0.0856476	53.7475	60.1623	63	62.612	61.4539	56.2561	55.9805	53.4676
Per1	0.0151544	0.441005	24	11.0718	8.85612	0.0138889	0.278415	24	13.5	9.04175	0.139071	1	24	11.7196	22.4972	0.0019297	0.0753583	24	12.0908	11.3934	9.5603	0.839107	3.72978	1.95149	7.79437	21.1117	23.8011	14.813	10.4497	7.49622
Ndufv1	0.269852	0.783457	24	12.9415	16.9969	0.000396825	0.173464	24	15	7.40175	0.27937	1	24	14.5363	167.797	0.00196475	0.0763653	24	14.1638	136.823	28.602	0.209044	123.199	121.3	125.543	126.872	159.041	181.251	131.257	126.119
Zbtb48	0.00590634	0.349506	24	9.67362	2.63097	0.0440476	0.413932	24	10.5	2.65869	0.115133	1	24	9.03856	12.3585	0.00196675	0.0763653	24	9.737	9.16692	2.69974	0.294509	7.09945	8.24246	11.1271	12.6381	11.1409	8.6215	7.07704	7.38874
Zfp341	0.00242472	0.284951	24	21.8363	0.352811	0.113095	0.577886	24	22.5	0.381161	0.111008	1	24	20.9999	1.75618	0.00199318	0.0768287	24	21.7791	1.47847	0.361036	0.244196	1.81345	1.61768	1.15572	1.1568	1.19154	1.43137	1.74161	1.71956
Smagp	0.0170111	0.446557	24	23.2713	2.42457	0.0138889	0.278415	24	0	2.1363	0.129032	1	24	7.73643e-05	11.9117	0.0019956	0.0768287	24	23.7575	8.93957	2.58034	0.288643	12.1154	10.1939	10.4552	6.73838	5.92793	7.48972	7.76815	10.8279
Mri1	0.00453504	0.319598	24	10.9408	2.35993	0.0440476	0.413932	24	12	2.00758	0.152623	1	24	11.6095	16.8702	0.0019957	0.0768287	24	11.5171	14.1775	2.44312	0.172324	13.1571	13.5834	14.5137	15.8482	17.5157	14.9461	12.3295	11.5264
Stard7	0.00514826	0.338988	24	10.0656	22.0123	0.0440476	0.413932	24	12	19.9293	0.134929	1	24	11.0971	148.09	0.00200165	0.0768394	24	11.0547	126.091	21.5722	0.171085	100.871	122.302	137.396	139.915	154.424	130.354	109.998	113.464
Fermt2	0.00568133	0.346331	24	22.9349	26.5356	0.0440476	0.413932	24	0	23.8944	0.124025	1	24	7.73643e-05	152.758	0.00202536	0.0774103	24	23.646	120.719	27.6477	0.229024	151.635	146.361	129.172	98.0391	84.7486	100.362	129.211	126.227
Zscan20	0.0160091	0.445683	24	21.919	1.12039	0.0138889	0.278415	24	22.5	1.19367	0.139804	1	24	20.499	5.13624	0.00202794	0.0774103	24	21.6425	4.00306	1.15466	0.288445	4.41143	4.33949	3.14463	2.66065	3.03844	3.92794	5.61187	4.89
Xk	0.00509833	0.338988	24	22.1667	1.72684	0.0440476	0.413932	24	0	1.39418	0.138938	1	24	20.9999	6.83435	0.00203419	0.0774307	24	22.383	5.65725	1.72513	0.304942	7.58818	6.23962	5.37543	3.26797	4.7066	4.72684	6.69001	6.6633
Eid2b	0.0145329	0.441005	24	22.1836	0.548416	0.0138889	0.278415	24	21	0.474365	0.155138	1	24	20.9999	3.15946	0.00204026	0.0774443	24	21.3931	2.25576	0.566813	0.251274	2.61085	2.02852	1.8814	1.50385	2.14478	2.1637	2.51566	3.19731
Tymp	0.0696153	0.590006	24	0.0987741	20.2974	0.0031746	0.18868	24	3	21.8416	0.142461	1	24	2.7988	71.1661	0.0020494	0.077574	24	1.98509	48.8855	30.132	0.616379	60.6026	81.2948	60.4198	33.7498	27.197	18.4081	50.8662	58.5457
Tef	0.00243838	0.284951	24	10.7544	90.2747	0.113095	0.577886	24	12	77.106	0.115705	1	24	10.3104	222.667	0.00207214	0.078216	24	11.0194	124.799	91.1468	0.730351	57.04	48.6845	131.16	236.885	208.997	157.45	102.313	55.8589
Rps6ka4	0.0142295	0.441005	24	10.4826	1.5548	0.0138889	0.278415	24	10.5	1.1677	0.162576	1	24	11.1116	8.73471	0.00208405	0.0783468	24	10.6979	7.24071	1.55504	0.214764	5.74901	7.26672	7.875	8.01087	9.59194	7.12355	6.80059	5.50797
Tgoln1	0.00554436	0.346331	24	22.0182	21.92	0.0440476	0.413932	24	0	17.9801	0.131803	1	24	20.9999	174.777	0.00208717	0.0783468	24	22.3309	158.705	21.8744	0.137831	182.824	158.07	155.457	134.334	133.751	160.014	171.701	173.488
Gm4952	0.0595234	0.564451	24	23.2882	19.3951	0.0031746	0.18868	24	3	18.7979	0.171618	1	24	7.73643e-05	105.668	0.00210005	0.0785273	24	0.73197	63.9432	22.4734	0.351459	107.829	78.1365	75.256	55.2952	49.6874	25.0323	54.2665	66.0419
Btd	0.0182563	0.453111	24	21.6863	4.36801	0.0138889	0.278415	24	22.5	4.91272	0.128156	1	24	20.9999	55.6224	0.00210357	0.0785273	24	21.7285	49.9089	4.48513	0.0898663	54.0819	46.2451	47.1156	45.8094	46.1724	50.5639	53.9347	55.3484
Mettl13	0.0156212	0.441005	24	11.1695	2.55615	0.0138889	0.278415	24	12	2.20592	0.151396	1	24	11.8426	12.2669	0.00212232	0.07901	24	11.671	8.95879	2.6937	0.300677	7.26665	7.44646	7.7675	11.568	12.541	10.2193	7.76815	7.09319
Zfp937	0.0148824	0.441005	24	22.699	0.471636	0.0138889	0.278415	24	22.5	0.40366	0.165025	1	24	20.9999	2.17205	0.00218941	0.0812842	24	22.0697	1.74917	0.469106	0.268188	1.99351	2.13123	1.69326	1.09896	1.25112	1.79753	1.82455	2.20319
Lasp1	0.00620108	0.351388	24	23.279	28.2955	0.0440476	0.413932	24	0	29.3917	0.1259	1	24	0.59611	96.6047	0.00220411	0.0816063	24	23.9586	77.5102	30.6134	0.39496	92.8845	101.862	79.1532	49.6558	50.9087	53.1271	89.1817	103.308
Pnpla2	0.0162482	0.445928	24	9.71707	8.09824	0.0138889	0.278415	24	10.5	7.24416	0.153279	1	24	9.11872	32.3728	0.00221476	0.0816499	24	9.77826	21.8589	8.28734	0.379129	15.4722	18.0256	26.259	33.4316	29.4907	18.2416	16.8356	17.115
Hist1h1c	0.0226613	0.473163	24	21.0857	21.907	0.0138889	0.278415	24	21	23.6787	0.110057	1	24	19.334	79.9154	0.00221734	0.0816499	24	20.4775	59.7558	25.9324	0.433972	80.319	50.2765	40.9876	28.8912	49.9853	67.8402	82.8234	76.9235
Zc4h2	0.00599008	0.351388	24	22.7267	0.351891	0.0440476	0.413932	24	0	0.285935	0.13203	1	24	7.73643e-05	1.33143	0.00222771	0.0817934	24	23.5773	0.967346	0.361407	0.361407	1.35044	1.05278	1.07509	0.520562	0.65535	0.798903	1.02285	1.2628
Leo1	0.00231916	0.284951	24	22.0987	6.53002	0.113095	0.577886	24	0	5.83081	0.133222	1	24	20.9999	17.2137	0.00223331	0.0817934	24	22.3591	13.9921	6.52061	0.466022	20.7582	18.95	11.4765	5.66834	8.66849	12.6493	16.9462	16.8195
Rbm22	0.0245144	0.482512	24	23.8909	1.1513	0.0138889	0.278415	24	3	1.33137	0.103051	1	24	0.944752	15.3336	0.00224091	0.0818504	24	1.26904	14.1038	1.50852	0.106958	15.1378	15.6632	14.4599	13.4189	12.9878	12.4829	13.7947	14.885
Wrnip1	0.00607069	0.351388	24	22.2556	11.4278	0.0440476	0.413932	24	22.5	11.7799	0.131848	1	24	20.9999	46.39	0.00224982	0.0819552	24	21.9206	33.4463	11.5555	0.345492	41.9151	32.0198	29.8068	21.1984	24.2479	27.6287	46.6366	44.1175
Brd7	0.113126	0.667813	24	0.831163	1.34975	0.0031746	0.18868	24	3	2.53853	0.0985146	1	24	1.71297	22.7223	0.0022563	0.0819708	24	1.8462	20.0366	2.1135	0.105482	22.443	22.8786	22.0124	19.4343	18.737	17.0433	17.969	19.775
Irak4	0.00638769	0.351388	24	22.0985	1.44088	0.0440476	0.413932	24	21	1.40739	0.126295	1	24	20.9999	11.6369	0.00226445	0.0820471	24	21.365	9.68202	1.4979	0.15471	10.6749	9.70608	8.00939	8.84955	8.51954	9.22067	11.0302	11.4458
Adamts4	0.0248973	0.482512	24	23.7864	0.17649	0.0138889	0.278415	24	3	0.204115	0.104625	1	24	1.46784	0.502317	0.0022982	0.0830476	24	1.41962	0.289045	0.233257	0.233257	0.463008	0.564904	0.349403	0.202441	0.0297886	0.133151	0.193513	0.376154
Tprgl	0.0165337	0.445928	24	11.0002	3.32017	0.0138889	0.278415	24	13.5	2.64066	0.158684	1	24	11.8005	30.9428	0.0023118	0.0833172	24	12.0948	26.9884	3.5661	0.132134	24.7581	24.2909	27.7372	28.4863	32.1717	28.8937	24.7973	24.7724
Hacl1	0.00647417	0.351388	24	22.1677	89.4109	0.0440476	0.413932	24	22.5	85.9717	0.129579	1	24	20.9999	334.034	0.00233856	0.084058	24	21.891	239.097	90.6627	0.379188	305.945	234.795	212.84	124.096	181.174	198.96	335.744	319.221
Lpin1	0.0496687	0.53812	24	10.6766	240.379	0.0031746	0.18868	24	12	91.0903	0.236198	1	24	10.9896	502.706	0.0023537	0.0843784	24	11.2209	192.483	243.517	1.26514	40.5518	57.954	107.777	498.351	579.925	131.253	86.9701	37.0781
Prpf19	0.00267258	0.285001	24	10.2496	8.29165	0.113095	0.577886	24	12	8.07054	0.124391	1	24	10.3456	77.4213	0.00237213	0.0848145	24	10.8609	68.471	8.23336	0.120246	61.0141	62.9611	72.407	75.7707	78.2845	70.3368	62.6981	64.2955
Hand2	0.00640697	0.351388	24	10.673	0.611926	0.0440476	0.413932	24	12	0.619277	0.135177	1	24	9.80544	3.88188	0.00240066	0.0855923	24	10.824	3.25506	0.614316	0.188726	2.75232	2.54207	3.57466	3.87529	3.72358	3.62835	3.0962	2.84802
Clcn5	0.0178672	0.451707	24	22.086	1.97682	0.0138889	0.278415	24	22.5	1.62335	0.154763	1	24	20.9999	12.6969	0.00241394	0.0855923	24	21.8634	10.3285	2.00943	0.194552	12.1668	9.06414	10.1327	8.03979	8.45997	10.2193	11.9978	12.5474
Samm50	0.0242241	0.482512	24	11.5978	6.95249	0.0138889	0.278415	24	15	8.53764	0.114218	1	24	14.7291	69.8808	0.00241512	0.0855923	24	13.8066	60.6877	9.34741	0.154025	50.082	52.6645	60.5542	62.3228	67.7393	69.904	66.4025	55.832
AI182371	0.0431465	0.52663	24	22.2192	33.9874	0.0031746	0.18868	24	1.5	18.4498	0.281121	1	24	7.73643e-05	372.441	0.00241915	0.0855923	24	23.9094	297.151	33.5524	0.112914	378.933	303.533	294.762	290.242	249.778	276.753	280.593	302.616
Kbtbd2	0.0166086	0.445928	24	10.4788	1.44034	0.0138889	0.278415	24	10.5	1.49514	0.168469	1	24	9.12621	24.4071	0.00243749	0.0860168	24	10.0372	22.9482	1.44445	0.0629439	21.6328	21.8772	24.055	24.5821	23.5628	23.4012	23.2215	21.2527
Cdh3	0.00765106	0.367326	24	21.8398	0.116543	0.0440476	0.413932	24	21	0.126337	0.116147	1	24	20.9999	0.602888	0.00245199	0.0863036	24	21.2794	0.44957	0.123197	0.123197	0.553037	0.410839	0.322526	0.375961	0.357463	0.432739	0.552893	0.591099
Sike1	0.00588902	0.349506	24	22.3932	1.79223	0.0440476	0.413932	24	0	1.64448	0.152184	1	24	7.73643e-05	13.8228	0.00246914	0.0863677	24	23.468	11.6254	1.79512	0.154414	13.7359	12.9158	11.8797	9.31227	9.91961	10.652	12.5507	12.0369
Zfp932	0.00562904	0.346331	24	21.926	0.736904	0.0440476	0.413932	24	0	0.622848	0.159321	1	24	20.9999	5.87145	0.00247053	0.0863677	24	22.2986	5.51908	0.734729	0.133125	6.4178	5.98285	5.21417	4.48262	5.03428	5.52575	5.58422	5.91099
Adam17	0.00648269	0.351388	24	22.354	4.05412	0.0440476	0.413932	24	21	3.81469	0.138799	1	24	20.9999	31.3209	0.00247723	0.0863677	24	21.4492	25.5555	4.13955	0.161982	28.6936	25.4464	22.0124	22.4998	23.4436	22.6689	28.8887	30.7909
Tia1	0.00539418	0.343741	24	21.8167	2.61796	0.0440476	0.413932	24	0	2.04042	0.166991	1	24	20.9999	14.7356	0.00247948	0.0863677	24	22.2603	13.3212	2.60699	0.195703	17.3885	13.9685	11.369	11.8283	10.6047	12.7492	14.0988	14.5625
Klf15	0.00657687	0.35151	24	10.5614	31.1363	0.0440476	0.413932	24	12	30.3698	0.137672	1	24	9.92994	152.988	0.00249004	0.0863677	24	10.8271	117.421	31.2095	0.265792	97.0773	86.6871	129.736	149.054	154.097	122.731	102.479	97.5045
Rnf20	0.0155647	0.441005	24	22.3728	3.1242	0.0138889	0.278415	24	0	2.50374	0.184915	1	24	7.73643e-05	38.79	0.00249472	0.0863677	24	23.4613	33.4948	3.12419	0.0932741	38.957	34.2537	31.715	32.6508	30.3844	31.0574	33.3395	35.6003
Pter	0.00666407	0.352753	24	23.3047	17.3694	0.0440476	0.413932	24	0	15.8526	0.136428	1	24	7.73643e-05	68.4283	0.00249842	0.0863677	24	23.7685	56.9518	18.5218	0.325219	69.0653	62.0881	63.1344	39.6495	38.9039	45.2046	60.4036	77.1653
Zfp692	0.00265895	0.285001	24	22.9171	0.752036	0.113095	0.577886	24	0	0.697562	0.135046	1	24	7.73643e-05	5.58447	0.00252729	0.0870303	24	23.6401	5.19492	0.782618	0.150651	5.49179	5.67472	4.86476	4.65614	4.25977	4.92657	5.66716	6.01847
Ddx52	0.132588	0.699017	24	1.1549	1.20132	0.0031746	0.18868	24	4.5	2.70468	0.0966278	1	24	1.51442	20.0405	0.00253044	0.0870303	24	2.36213	17.2625	2.14228	0.124101	19.845	20.2082	18.9753	17.6413	15.5497	14.347	14.9558	16.5777
Cactin	0.0152825	0.441005	24	23.2415	0.894963	0.0138889	0.278415	24	0	0.686857	0.192339	1	24	7.73643e-05	10.7499	0.00253827	0.0870788	24	23.7476	10.1018	0.950769	0.0941191	10.7263	10.271	9.72953	9.54363	9.44299	9.48697	9.97973	11.6339
Kxd1	0.00680863	0.35623	24	10.3764	3.9235	0.0440476	0.413932	24	12	3.90144	0.138236	1	24	11.5233	25.5951	0.0025705	0.0879351	24	11.3016	21.3429	3.9196	0.183649	17.9158	20.1054	22.7918	24.4086	25.5884	23.7674	17.2503	18.9152
Alg10b	0.00762334	0.367326	24	23.0435	4.65937	0.0440476	0.413932	24	1.5	4.8782	0.123894	1	24	7.73643e-05	36.1905	0.00257787	0.0879351	24	0.178005	31.3341	5.04933	0.161145	36.1146	34.2794	32.6826	26.6643	27.1374	26.3305	33.3948	34.0688
Tpmt	0.00584291	0.349506	24	10.865	2.9453	0.0440476	0.413932	24	10.5	2.97941	0.162963	1	24	10.5173	30.4165	0.00259511	0.0879351	24	10.6274	27.3864	2.94173	0.107416	26.713	25.5234	29.3498	29.3539	30.9504	28.2945	25.1014	23.8052
Crbn	0.0178078	0.451707	24	11.4461	2.75233	0.0138889	0.278415	24	12	2.4013	0.169679	1	24	11.7245	29.9981	0.0025964	0.0879351	24	11.7235	26.9019	2.93426	0.109073	25.9542	24.3422	27.119	28.5441	31.0695	27.9283	26.3454	23.9127
Apoa5	0.11379	0.66915	24	12.6497	194.373	0.0031746	0.18868	24	15	262.057	0.116275	1	24	14.2724	1177.67	0.00259823	0.0879351	24	13.9788	849.584	307.531	0.361978	623.221	601.982	659.001	795.1	1220.71	1148.09	970.604	777.967
Slc39a10	0.0265379	0.482704	24	21.0922	1.26763	0.0138889	0.278415	24	21	1.43128	0.114168	1	24	18.8196	7.26046	0.00260217	0.0879351	24	20.3135	6.04621	1.5341	0.253729	7.08659	5.62336	4.94539	4.30909	5.36195	6.42451	7.74051	6.87825
Rcn3	0.104359	0.657012	24	12.2827	0.253607	0.0031746	0.18868	24	15	0.49581	0.128606	1	24	15.2447	5.14249	0.00262888	0.0886167	24	14.1958	4.69657	0.397972	0.0847367	4.20565	3.90297	4.40785	4.80074	5.09385	5.15958	5.03133	4.97061
Uvrag	0.00779453	0.367326	24	11.0455	6.88113	0.0440476	0.413932	24	13.5	6.30942	0.124674	1	24	10.8293	42.2106	0.00263887	0.0887328	24	11.7771	34.6303	7.26399	0.209758	29.401	26.8586	33.9458	42.8017	41.7339	37.8147	34.5558	29.9311
Parp9	0.0188634	0.453111	24	23.1199	6.85596	0.0138889	0.278415	24	0	5.39749	0.165479	1	24	7.73643e-05	64.7457	0.00266663	0.0892845	24	23.7072	57.5924	7.22928	0.125525	64.7182	59.6487	55.9313	52.6635	52.279	53.4932	54.4047	67.6003
Unc50	0.0198154	0.453111	24	11.2861	2.57567	0.0138889	0.278415	24	12	2.66612	0.15774	1	24	12.0035	21.6624	0.00266957	0.0892845	24	11.7635	18.2638	2.74381	0.150232	16.2953	17.1782	17.2014	20.0995	21.7755	20.6383	16.5592	16.3627
Patl1	0.1111	0.66419	24	0.533598	0.747524	0.0031746	0.18868	24	3	0.901201	0.123394	1	24	1.67674	9.51725	0.00267504	0.0892845	24	1.73571	8.56344	1.11972	0.130756	9.3116	9.9115	8.78883	8.61819	7.74504	7.05698	8.15518	8.92023
Isca2	0.00497152	0.336477	24	11.2146	1.35129	0.0440476	0.413932	24	10.5	1.1302	0.203597	1	24	10.773	12.6661	0.00272855	0.0907352	24	10.8291	11.3781	1.35092	0.118731	11.318	10.6818	12.2022	12.2332	12.8687	11.917	10.5879	9.21578
Amt	0.135581	0.699783	24	0.905506	9.19282	0.0031746	0.18868	24	3	14.5347	0.10374	1	24	3.12956	62.8504	0.0027319	0.0907352	24	2.3537	46.2523	15.984	0.345584	55.6638	67.0182	58.6191	41.2979	34.9123	28.8937	38.2602	45.3534
Ctsf	0.114041	0.66921	24	12.704	2.60054	0.0031746	0.18868	24	15	3.39116	0.123809	1	24	14.4924	25.279	0.00274051	0.0907986	24	14.0718	21.2928	4.20704	0.197581	19.5749	16.3309	20.0504	21.4009	24.6948	25.7979	22.5028	19.9899
Sult1b1	0.0026648	0.285001	24	11.0774	5.42121	0.113095	0.577886	24	12	5.25963	0.149411	1	24	11.7635	25.6152	0.00275082	0.0909181	24	11.614	19.8964	5.67278	0.285116	17.4014	18.5905	21.3673	23.2807	25.9161	23.8007	15.7298	13.0848
Pibf1	0.116062	0.672982	24	0.336376	0.549735	0.0031746	0.18868	24	3	0.912751	0.12331	1	24	1.08589	7.17392	0.00277109	0.0913652	24	1.46613	6.11962	0.772646	0.126257	6.9837	7.52349	6.53115	5.72618	5.71941	5.09301	5.30778	6.0722
Rab8b	0.0187844	0.453111	24	22.7547	1.58565	0.0138889	0.278415	24	0	1.52208	0.175368	1	24	7.73643e-05	7.77508	0.00278702	0.0916672	24	23.5866	6.16592	1.63177	0.264644	7.98688	5.85446	5.72483	5.69726	4.2002	5.02643	6.91117	7.92611
Usp22	0.00739107	0.367326	24	10.5307	5.70437	0.0440476	0.413932	24	12	4.88673	0.141268	1	24	9.77573	34.3349	0.00279891	0.0918355	24	10.7654	28.3137	5.71151	0.201722	23.7291	25.8058	30.5324	32.8243	36.3123	27.2293	27.5341	22.5424
Spata22	0.116172	0.673157	24	0.696558	0.927742	0.0031746	0.18868	24	3	1.24996	0.125469	1	24	3.25001	4.04682	0.00281298	0.092074	24	2.32777	2.85571	1.56875	0.549339	3.71692	3.95433	3.87031	2.86309	1.37028	1.16507	2.68153	3.22418
Fgf11	0.0245879	0.482512	24	23.3786	0.131824	0.0138889	0.278415	24	1.5	0.143251	0.135935	1	24	7.73643e-05	0.59684	0.00282037	0.0920937	24	0.289126	0.428665	0.147669	0.147669	0.617344	0.462194	0.510666	0.347041	0.268098	0.299589	0.387025	0.537363
Med12l	0.00691871	0.358854	24	22.5155	2.05814	0.0440476	0.413932	24	21	1.69952	0.153194	1	24	20.9999	8.85749	0.00283354	0.0923013	24	21.5022	5.82582	2.07621	0.35638	6.94512	5.8031	4.51536	3.87529	4.76618	4.19424	8.01695	8.49034
Tspan4	0.124861	0.686461	24	12.8211	14.8107	0.0031746	0.18868	24	15	18.0576	0.119006	1	24	13.556	61.5003	0.00285765	0.0928635	24	13.7891	37.4223	22.9108	0.612224	25.3368	15.2524	19.7547	40.7484	58.1772	66.0427	40.8035	33.2628
Yif1a	0.00734018	0.367326	24	10.9672	6.06037	0.0440476	0.413932	24	12	6.23889	0.147637	1	24	11.8327	38.3846	0.00288549	0.0935436	24	11.6006	31.1518	6.30853	0.20251	27.1245	29.8115	30.6131	36.0634	38.3975	35.5845	26.0413	25.5785
Rbm28	0.0078089	0.367326	24	22.2885	2.95859	0.0440476	0.413932	24	22.5	3.04387	0.13956	1	24	20.9999	26.3561	0.00289885	0.0937526	24	21.9317	23.2243	2.9884	0.128675	25.9027	24.0084	21.6361	19.6657	22.2521	20.9712	25.3502	26.0084
Mrap	0.0222785	0.47078	24	21.7849	6.90775	0.0138889	0.278415	24	21	5.80182	0.155704	1	24	20.9999	37.6738	0.00290749	0.0938082	24	21.2612	30.7743	7.32677	0.238081	37.1564	30.9413	26.7159	19.9549	27.5843	33.3875	31.7637	38.6901
Slc46a1	0.008893	0.378806	24	11.141	3.59232	0.0440476	0.413932	24	12	3.90414	0.123609	1	24	11.8963	32.2143	0.00291939	0.0939685	24	11.6795	27.7986	3.78396	0.13612	24.8352	24.6504	26.5009	31.7543	31.6355	30.7911	26.4283	25.7934
Fam76a	0.00769273	0.367326	24	10.5936	3.86591	0.0440476	0.413932	24	12	3.76575	0.143801	1	24	9.85356	19.2141	0.00293454	0.0942321	24	10.8128	14.7969	3.87642	0.261975	11.5752	10.1683	15.965	19.0294	19.0349	15.745	13.9606	12.8967
Smc5	0.00847433	0.374636	24	23.0805	6.15448	0.0440476	0.413932	24	0	5.67628	0.132195	1	24	0.802036	32.3962	0.00296499	0.0948101	24	23.9612	27.8558	6.58864	0.236526	31.8446	32.9185	28.5704	22.789	19.0945	24.6661	31.0173	31.9462
Jade1	0.118756	0.678138	24	8.3993	11.4855	0.0031746	0.18868	24	7.5	14.1761	0.131273	1	24	6.23279	71.0528	0.00297213	0.0948101	24	7.37903	51.1662	16.9325	0.330932	43.6128	57.0553	74.6378	65.7643	47.3043	46.0368	36.7121	38.2065
Tbc1d20	0.00767332	0.367326	24	10.2469	5.32597	0.0440476	0.413932	24	12	4.50909	0.14682	1	24	9.72436	31.8432	0.0029787	0.0948101	24	10.6511	26.0952	5.30157	0.203163	21.3369	22.3137	27.7103	33.7498	29.0439	28.6939	22.7792	23.1335
Bhlhe41	0.0725427	0.599548	24	9.28973	1.96086	0.0031746	0.18868	24	10.5	1.22663	0.216021	1	24	8.79082	4.55827	0.00298481	0.0948101	24	9.52488	1.71711	2.04182	1.1891	0.411562	0.590581	3.65529	5.40806	2.02563	0.798903	0.497604	0.349286
Sco2	0.107129	0.660459	24	0.358706	3.9719	0.0031746	0.18868	24	3	4.61069	0.146794	1	24	2.91471	18.4503	0.0029934	0.0948101	24	2.10655	13.7181	6.21543	0.453084	16.4239	20.3109	16.1263	12.2332	9.11532	6.22479	14.237	15.073
Cdh1	0.0283651	0.49079	24	23.7715	18.4483	0.0138889	0.278415	24	1.5	17.6876	0.12678	1	24	2.56416	74.6995	0.00299452	0.0948101	24	1.28362	57.0032	23.9201	0.419628	67.7921	80.7813	65.0964	44.2188	30.0865	41.5763	57.6115	68.8631
Raet1d	0.0264724	0.482512	24	9.56338	1.3446	0.0138889	0.278415	24	7.5	1.76191	0.137643	1	24	6.06117	7.1859	0.0030269	0.0956121	24	7.70051	5.09189	1.67558	0.329068	5.29887	6.16259	7.60623	6.50702	5.18322	4.92657	2.8474	2.20319
Cep170	0.00800916	0.367326	24	22.6309	2.79486	0.0440476	0.413932	24	0	2.5362	0.144654	1	24	7.73643e-05	20.2785	0.00304764	0.0959205	24	23.5459	16.1779	2.85061	0.176204	20.2566	17.4093	14.7556	15.1831	13.6432	13.3151	16.6974	18.1629
Nphp1	0.0264299	0.482512	24	9.63555	0.688458	0.0138889	0.278415	24	9	0.665354	0.139197	1	24	8.45916	2.98709	0.00305082	0.0959205	24	9.03145	2.13827	0.748326	0.349968	1.82631	1.84878	3.19838	2.86309	2.44267	2.06383	1.49281	1.37028
Atf5	0.00861006	0.376371	24	23.1589	20.2136	0.0440476	0.413932	24	0	16.8426	0.135877	1	24	0.699817	84.7363	0.00307203	0.0963635	24	23.9532	70.5826	21.7266	0.307818	82.1067	88.2791	71.3588	49.6269	46.1128	66.0759	69.8028	91.298
Acaca	0.0224081	0.47078	24	10.9004	57.1587	0.0138889	0.278415	24	12	39.1387	0.167315	1	24	11.8985	304.91	0.00309836	0.0969652	24	11.6006	241.951	59.316	0.245157	173.332	224.78	229.235	278.558	334.675	247.926	253.972	193.128
Pex6	0.00827814	0.371447	24	10.341	9.29885	0.0440476	0.413932	24	12	7.1013	0.143272	1	24	10.9686	72.0814	0.00310659	0.0969987	24	11.1021	61.9435	9.26332	0.149545	53.0787	60.9069	62.7313	70.565	75.246	60.7832	57.6944	54.5424
Fam13b	0.00804042	0.367326	24	22.5822	6.04095	0.0440476	0.413932	24	0	5.18672	0.149128	1	24	20.9999	33.9366	0.00313445	0.0975287	24	22.5288	27.5279	6.04058	0.219435	30.4042	30.5048	25.8827	20.5911	19.9584	29.1267	29.5522	34.2032
Slc39a8	0.00855638	0.375235	24	22.7685	5.55903	0.0440476	0.413932	24	0	5.60603	0.140328	1	24	7.73643e-05	33.4264	0.00313796	0.0975287	24	23.5911	26.8872	5.7263	0.212975	33.5423	30.248	29.0811	20.996	20.6435	22.336	29.6627	28.5877
Pcdh18	0.0986097	0.646862	24	0.32871	0.388768	0.0031746	0.18868	24	3	0.304738	0.169872	1	24	3.15574	1.67064	0.00315201	0.0976195	24	2.17972	1.28174	0.612616	0.477956	1.58194	1.61768	1.55887	1.33032	0.536195	0.798903	1.27165	1.55835
Sra1	0.0087485	0.377505	24	11.1401	11.2142	0.0440476	0.413932	24	12	11.3816	0.138174	1	24	11.8028	64.8823	0.00315529	0.0976195	24	11.648	51.2672	11.787	0.229913	44.3973	44.3963	47.8682	63.6821	63.3306	59.3851	44.8949	42.183
Trim14	0.0308662	0.499907	24	23.539	2.61421	0.0138889	0.278415	24	3	3.40837	0.125182	1	24	0.850102	16.2256	0.00317559	0.0980236	24	1.11966	12.4939	3.23817	0.25918	15.7423	16.8444	14.1911	9.83283	9.97919	8.78793	12.0531	12.5206
Thap7	0.0257547	0.482512	24	11.1183	0.661189	0.0138889	0.278415	24	13.5	0.734883	0.151571	1	24	13.4193	10.7707	0.00320227	0.0986227	24	12.6904	9.96	0.749423	0.0752433	8.81001	9.70608	9.81016	10.0931	10.7835	10.8518	9.97973	9.64567
Asgr1	0.0948993	0.637882	24	12.216	60.8336	0.0031746	0.18868	24	13.5	40.0208	0.180758	1	24	12.871	381.68	0.00321379	0.0987529	24	12.8624	291.463	76.7408	0.263296	248.378	235.437	255.36	291.63	390.827	386.902	269.425	253.743
Rbbp5	0.0284498	0.49079	24	21.122	1.74282	0.0138889	0.278415	24	21	1.7572	0.13922	1	24	18.2025	24.2352	0.00324048	0.099348	24	20.1288	22.7681	2.15935	0.0948411	24.3594	22.6732	21.5286	20.1284	21.6563	23.6342	24.5208	23.644
3110001I22Rik	0.0214653	0.466147	24	10.7223	0.792667	0.0138889	0.278415	24	10.5	0.673831	0.186464	1	24	11.1425	3.75356	0.00326832	0.0999753	24	10.7882	2.91909	0.795488	0.272512	2.36648	2.79884	2.71459	4.19341	3.36611	3.32876	2.51566	2.06885
Bend6	0.00721753	0.365211	24	22.313	0.0334214	0.0440476	0.413932	24	1.5	0.0254643	0.175637	1	24	7.73643e-05	0.182341	0.00328019	0.100065	24	23.9396	0.127388	0.0333764	0.0333764	0.180059	0.154065	0.107509	0.11568	0.0893659	0.0998629	0.138223	0.134341
Slc35b2	0.00875627	0.377505	24	10.4156	7.28362	0.0440476	0.413932	24	12	6.81918	0.145089	1	24	11.4928	30.9896	0.00328604	0.100065	24	11.3042	22.4148	7.29461	0.325438	16.5011	20.8244	22.523	30.048	31.0695	25.1987	15.2322	17.9211
Prdx3	0.0248765	0.482512	24	11.0629	9.57569	0.0138889	0.278415	24	12	10.0923	0.162531	1	24	12.2644	88.4046	0.00329542	0.100082	24	11.7767	77.0534	10.117	0.131299	65.9786	71.9225	78.4006	78.6048	90.3489	88.0458	71.7103	71.4156
Lrrc20	0.0280292	0.49079	24	23.4267	0.495361	0.0138889	0.278415	24	3	0.56982	0.144568	1	24	0.351662	3.85033	0.00330137	0.100082	24	0.904441	3.38526	0.592243	0.174948	3.8584	3.72323	3.70905	2.92093	2.85971	2.76287	3.59381	3.65407
Cutal	0.0231026	0.477454	24	22.2475	6.93544	0.0138889	0.278415	24	22.5	5.72009	0.176268	1	24	21	41.6524	0.00331474	0.100264	24	21.9179	35.5278	7.01476	0.197444	38.121	40.0825	33.3814	23.9169	30.1163	36.6497	40.4165	41.5382
Cog4	0.00417168	0.30557	24	10.1498	5.94253	0.113095	0.577886	24	12	6.08801	0.121292	1	24	10.8393	59.8875	0.00334655	0.101	24	10.9948	53.7577	5.8613	0.109032	49.2589	52.382	57.0602	59.1416	59.6368	55.9565	47.1342	49.4911
Cdc27	0.0134773	0.438527	24	21.6668	3.36065	0.0138889	0.278415	24	0	1.84414	0.306917	1	24	7.73643e-05	46.7761	0.00335728	0.101099	24	23.2334	39.3842	3.15669	0.0801512	47.0467	40.6731	38.0043	37.654	35.5974	38.2475	38.7578	39.0932
Tmem62	0.0385872	0.51547	24	23.8717	0.89996	0.0138889	0.278415	24	3	1.26122	0.109844	1	24	1.99214	14.233	0.00342476	0.102779	24	1.63198	12.9162	1.23559	0.0956622	13.9674	14.4564	13.7342	12.1175	11.6771	12.0168	12.3019	13.0579
Xrcc1	0.034386	0.506484	24	23.7377	1.34814	0.0138889	0.278415	24	3	1.58063	0.123419	1	24	2.28967	10.4453	0.00342826	0.102779	24	1.69474	8.95454	1.83102	0.20448	10.1604	10.4507	10.0789	7.92411	6.94075	7.55629	9.06745	9.45759
Mphosph9	0.0223492	0.47078	24	10.6869	0.913809	0.0138889	0.278415	24	10.5	0.649936	0.194215	1	24	10.1628	6.72016	0.00349178	0.104453	24	10.4499	5.70632	0.912154	0.15985	5.2217	5.59768	5.48294	7.2011	6.46413	5.72547	5.36307	4.59445
Fhit	0.00374473	0.304485	24	10.3701	0.407203	0.113095	0.577886	24	12	0.374928	0.143825	1	24	11.7811	2.46344	0.0035213	0.105104	24	11.3866	2.04216	0.406871	0.199235	1.45333	1.90013	2.04266	2.45821	2.3533	2.39671	1.85219	1.88077
Zrsr2	0.0359702	0.507372	24	23.7408	0.748148	0.0138889	0.278415	24	3	0.699025	0.123533	1	24	0.883102	6.83411	0.00355913	0.106	24	1.19774	6.01611	0.956341	0.158963	6.80364	6.8302	6.31613	5.8997	4.79597	5.05972	6.10947	6.31402
Amfr	0.134664	0.699783	24	12.5875	34.6793	0.0031746	0.18868	24	15	36.7626	0.146909	1	24	14.0513	352.271	0.00361018	0.106954	24	13.8825	296.854	53.6027	0.180569	265.638	250.407	268.073	301.347	336.343	374.02	295.3	283.701
Ick	0.00934311	0.38837	24	22.4807	3.06453	0.0440476	0.413932	24	0	3.20077	0.152711	1	24	7.73643e-05	17.6566	0.00361217	0.106954	24	23.4966	14.485	3.09053	0.213361	17.4271	16.8187	14.1911	11.597	10.7537	12.7492	17.0015	15.3417
Rad54b	0.00779277	0.367326	24	22.8067	0.280059	0.0440476	0.413932	24	21	0.254782	0.183259	1	24	20.9999	0.956824	0.00361486	0.106954	24	21.5971	0.525637	0.275975	0.275975	0.630205	0.462194	0.537543	0.173521	0.238309	0.532602	0.663472	0.967254
Atp5sl	0.00968499	0.395305	24	10.3545	5.80548	0.0440476	0.413932	24	12	5.68632	0.152764	1	24	9.46479	30.3373	0.00372045	0.109838	24	10.6017	23.5749	5.796	0.245854	18.9962	17.7174	27.0922	29.0936	30.4738	23.3679	21.9222	19.9362
Siae	0.0117825	0.4276	24	9.5353	6.87317	0.0440476	0.413932	24	9	6.82115	0.126622	1	24	9.06775	42.6645	0.00374582	0.110347	24	9.20092	34.321	7.38098	0.215057	28.7579	32.8928	38.945	43.1199	40.5423	32.2557	27.4788	30.576
Tmem19	0.0863699	0.628909	24	21.7097	7.56862	0.0031746	0.18868	24	22.5	5.01673	0.247834	1	24	20.9999	117.853	0.00384922	0.113147	24	21.7364	110.932	7.76766	0.0700219	116.112	111.902	108.422	94.2795	111.201	111.514	115.804	118.22
Aifm2	0.0329438	0.504601	24	11.3698	4.13556	0.0138889	0.278415	24	13.5	4.04311	0.149896	1	24	11.8636	24.0473	0.00387829	0.113576	24	12.2396	18.848	4.60862	0.244514	16.0767	12.5049	17.8195	22.5866	24.8139	21.2375	18.5496	17.1956
Cep290	0.0102609	0.407555	24	22.5054	1.89084	0.0440476	0.413932	24	0	1.70036	0.151859	1	24	7.73643e-05	8.66669	0.00388059	0.113576	24	23.5047	6.69503	1.91049	0.285359	8.83573	6.93291	7.09557	4.77182	4.58745	5.52575	8.09989	7.71116
Il15ra	0.0763304	0.609519	24	10.2755	6.37281	0.0031746	0.18868	24	12	3.01625	0.285481	1	24	9.54059	30.241	0.00390548	0.113932	24	10.5996	21.9669	6.35269	0.289194	17.3371	18.5391	19.8353	34.9644	26.7204	20.8713	19.6001	17.8673
Fgfr1	0.0346533	0.507044	24	9.24985	2.89706	0.0138889	0.278415	24	9	2.84036	0.143916	1	24	8.53614	11.3669	0.00390954	0.113932	24	8.92877	7.83318	3.22181	0.411303	4.90017	9.03846	9.48763	12.4935	9.29405	6.15821	6.05418	5.23929
Zbtb7b	0.0348694	0.507372	24	23.6775	8.10074	0.0138889	0.278415	24	1.5	8.79217	0.14371	1	24	0.670949	60.5437	0.00392478	0.114018	24	0.616682	53.0968	9.58276	0.180477	58.6348	64.6558	51.7923	48.3833	44.1467	47.1686	48.5993	61.3937
Mapk1ip1l	0.187728	0.741572	24	0.947583	2.22945	0.0031746	0.18868	24	3	3.88359	0.116951	1	24	1.95996	44.6162	0.00392934	0.114018	24	1.96907	39.9004	3.60909	0.0904524	44.0115	45.2694	42.7347	40.4592	36.9677	33.4874	38.0667	38.2065
E2f3	0.0106227	0.407555	24	10.6742	0.367692	0.0440476	0.413932	24	12	0.401388	0.149965	1	24	11.6633	6.95621	0.00395092	0.114399	24	11.4469	6.51862	0.37487	0.0575077	6.23774	6.31665	6.53115	6.88298	6.91096	6.79068	6.16476	6.31402
Exosc5	0.0350722	0.507372	24	11.5631	3.95386	0.0138889	0.278415	24	13.5	3.51321	0.145579	1	24	12.9927	22.0704	0.00398492	0.115138	24	12.6886	16.9967	4.67748	0.2752	12.6941	14.2767	16.3682	17.4388	22.401	22.6356	15.7575	14.4013
Bmp1	0.157249	0.716166	24	20.5876	8.26577	0.0031746	0.18868	24	19.5	10.2115	0.142882	1	24	18.8377	107.497	0.00400378	0.115334	24	19.6405	94.1006	11.4678	0.121867	94.7751	86.4046	79.0188	87.7147	88.5616	97.9655	115.997	102.368
Otulin	0.0101694	0.407555	24	10.463	3.53208	0.0440476	0.413932	24	12	3.29301	0.159477	1	24	11.3701	30.5127	0.00400873	0.115334	24	11.2783	26.2477	3.54636	0.135111	22.5202	23.7003	25.4527	30.8288	30.1759	27.6953	24.272	25.3367
L2hgdh	0.0120712	0.4276	24	11.3305	9.74187	0.0440476	0.413932	24	12	9.37597	0.13502	1	24	11.949	70.1532	0.00402491	0.115554	24	11.7601	57.7162	10.3893	0.180006	51.5611	50.3535	54.9638	64.781	71.9693	64.345	53.2436	50.5121
Tesk2	0.102684	0.655095	24	11.8888	1.79379	0.0031746	0.18868	24	13.5	1.0266	0.224712	1	24	12.5931	16.2157	0.00409127	0.117014	24	12.6601	13.6218	2.16084	0.15863	12.1154	12.4536	12.8742	13.2743	17.2774	15.5453	13.0483	12.3862
Zbtb3	0.0106992	0.407555	24	22.22	0.140007	0.0440476	0.413932	24	0	0.146289	0.155616	1	24	20.9999	0.375841	0.00409518	0.117014	24	22.4017	0.255498	0.139909	0.139909	0.398701	0.359484	0.107509	0.173521	0.119154	0.233013	0.276447	0.376154
Tmem218	0.0445456	0.529901	24	0.0599455	0.665443	0.0138889	0.278415	24	3	0.764497	0.119312	1	24	2.52138	2.72437	0.00411688	0.117014	24	1.87662	2.01906	0.968026	0.479443	2.45651	3.02994	2.28456	1.70629	1.16176	1.13178	1.99042	2.39127
Hist1h4i	0.0471825	0.534374	24	20.9647	0.881869	0.0138889	0.278415	24	21	1.00743	0.112658	1	24	19.2378	4.39054	0.00411727	0.117014	24	20.4054	3.33956	1.05971	0.31732	3.80695	2.92723	2.12329	2.42929	2.82992	3.59506	4.92075	4.08396
Ppip5k1	0.0124114	0.429049	24	23.2099	0.717742	0.0440476	0.413932	24	3	0.874335	0.135108	1	24	7.73643e-05	5.42783	0.00411893	0.117014	24	0.705456	4.08411	0.822861	0.201479	5.33745	5.28956	4.13908	3.96205	2.97886	3.2289	3.78732	3.94962
Enpp4	0.224872	0.771285	24	13.6158	1.04228	0.0031746	0.18868	24	16.5	1.78226	0.104279	1	24	15.1244	14.6765	0.00414517	0.117346	24	15.0811	12.4318	2.22008	0.178581	11.035	10.2453	10.7509	12.291	13.5538	15.3789	13.4906	12.7086
Ctso	0.0119969	0.4276	24	11.508	4.65946	0.0440476	0.413932	24	12	4.31404	0.141179	1	24	11.9527	48.6744	0.00415242	0.117346	24	11.8203	43.1487	5.01858	0.116309	41.1048	38.927	42.8422	46.0119	49.6278	46.4362	41.5223	38.717
Med8	0.0105509	0.407555	24	22.1219	3.97728	0.0440476	0.413932	24	0	3.11287	0.161095	1	24	20.9999	31.8657	0.00416434	0.117346	24	22.3673	28.5281	3.9722	0.139238	33.9025	29.3493	26.8771	23.6566	26.3629	28.0282	27.6723	32.3761
Prkg2	0.0105942	0.407555	24	10.3707	0.179753	0.0440476	0.413932	24	12	0.148068	0.160481	1	24	11.2824	0.466309	0.00416527	0.117346	24	11.2182	0.256058	0.179423	0.179423	0.0643066	0.154065	0.268771	0.404881	0.536195	0.266301	0.165868	0.188077
Chchd7	0.0388379	0.51547	24	11.9852	1.40273	0.0138889	0.278415	24	13.5	1.38209	0.139855	1	24	12.4536	9.97645	0.00419015	0.117802	24	12.645	8.14112	1.6943	0.208116	7.3824	6.54775	7.63311	8.58927	10.3664	9.55355	8.01695	7.03946
Rab14	0.00813173	0.367326	24	22.4422	5.88558	0.0440476	0.413932	24	3	6.16844	0.211598	1	24	7.73643e-05	116.741	0.00420596	0.118002	24	0.449729	103.905	6.02677	0.0580025	116.344	111.569	104.74	99.3695	98.511	95.7019	104.442	100.568
Slc2a9	0.0446961	0.529901	24	8.94552	8.18583	0.0138889	0.278415	24	9	10.2258	0.122689	1	24	7.18675	42.0791	0.00422268	0.118116	24	8.38232	31.9953	9.87718	0.308707	23.7163	37.6175	41.8477	39.7941	38.2784	25.6315	25.4331	23.644
Mblac2	0.0269309	0.484649	24	21.8498	1.72182	0.0138889	0.278415	24	22.5	1.28456	0.203905	1	24	19.3644	10.189	0.00422745	0.118116	24	21.2554	9.29782	1.82245	0.196009	11.1122	9.9115	9.27262	6.27566	8.1025	9.48697	10.1456	10.0756
Nadk	0.230779	0.773026	24	13.8914	14.0686	0.0031746	0.18868	24	16.5	22.6601	0.104671	1	24	15.0273	179.043	0.00424616	0.118394	24	15.1373	151.462	31.0659	0.205107	141.166	118.681	131.241	151.397	166.34	184.713	167.831	150.327
Hmgcs1	0.0489556	0.535749	24	23.985	108.94	0.0138889	0.278415	24	3	129.588	0.11325	1	24	2.2886	400.512	0.0042604	0.118548	24	1.7718	256.212	154.658	0.603632	353.313	461.09	311.936	194.546	108.162	116.806	224.281	279.563
Abhd17a	0.133858	0.699581	24	12.3944	5.05325	0.0031746	0.18868	24	15	4.71317	0.182516	1	24	14.4058	39.9819	0.00428536	0.118569	24	13.9425	32.2756	7.73761	0.239735	28.4493	25.1639	31.3119	31.4361	38.338	42.6747	31.6255	29.2057
Fibin	0.0883928	0.634098	24	11.2426	0.160242	0.0031746	0.18868	24	12	0.08234	0.276425	1	24	11.9748	0.664089	0.00428575	0.118569	24	11.7395	0.451113	0.170135	0.170135	0.321533	0.385162	0.403157	0.491642	0.804293	0.466027	0.41467	0.322418
Dhrs7b	0.159766	0.716166	24	12.6502	1.17561	0.0031746	0.18868	24	15	1.30992	0.15302	1	24	14.2184	14.2685	0.00428765	0.118569	24	13.9604	12.2741	1.85382	0.151035	11.1765	10.5278	11.4765	11.8862	14.1496	14.7464	12.2466	11.9832
Nif3l1	0.0112142	0.416235	24	22.2424	1.07459	0.0440476	0.413932	24	0	0.887913	0.157505	1	24	20.9999	11.5285	0.00429617	0.118569	24	22.4095	10.6547	1.07396	0.100796	11.8196	11.1183	10.3208	9.19659	9.86003	10.7852	10.4497	11.6876
Slc45a3	0.0138371	0.438527	24	21.8116	11.3757	0.0440476	0.413932	24	21	10.9032	0.128935	1	24	20.9999	38.4649	0.00433122	0.11899	24	21.2701	24.7062	12.0461	0.487575	32.7707	22.8786	15.4812	10.0064	21.7159	19.8061	38.3155	36.675
Baiap2	0.0483962	0.534374	24	21.029	6.47512	0.0138889	0.278415	24	21	8.00995	0.117104	1	24	19.1209	35.6284	0.00433697	0.11899	24	20.3892	27.8884	7.77827	0.278907	29.9283	27.86	18.0883	18.9716	24.3075	34.253	34.5282	35.1704
Zfp111	0.0380814	0.51547	24	21.5196	0.713225	0.0138889	0.278415	24	21	0.595351	0.149333	1	24	20.2114	6.15898	0.00434901	0.11899	24	20.9108	5.42419	0.787878	0.145253	5.86476	5.26388	5.07978	4.10665	5.06407	5.89191	5.91596	6.20654
Rbm5	0.0335101	0.504601	24	23.1242	2.35206	0.0138889	0.278415	24	1.5	1.9141	0.169863	1	24	7.73643e-05	53.0841	0.0043523	0.11899	24	0.204694	50.4627	2.56994	0.0509276	53.0144	52.382	50.3409	49.945	47.0064	47.6679	51.9996	51.345
Stk26	0.0110175	0.41129	24	22.3506	0.120761	0.0440476	0.413932	24	0	0.116293	0.163141	1	24	20.9999	0.555208	0.0043574	0.11899	24	22.4475	0.449009	0.120737	0.120737	0.617344	0.513549	0.349403	0.375961	0.357463	0.399452	0.41467	0.564231
Xpot	0.0372926	0.512064	24	11.9575	18.6609	0.0138889	0.278415	24	13.5	18.9408	0.153145	1	24	12.2527	111.57	0.0043641	0.11899	24	12.568	86.8832	22.2691	0.25631	78.8528	67.2236	78.8844	95.8412	114.924	105.655	82.2152	71.4693
Dnah8	0.0505193	0.541803	24	0.066804	0.30092	0.0138889	0.278415	24	3	0.348296	0.114364	1	24	1.64168	1.08352	0.00440516	0.119557	24	1.57134	0.727146	0.419314	0.419314	0.990322	1.23252	0.860069	0.491642	0.476618	0.299589	0.552893	0.913517
Ston2	0.0130629	0.436442	24	23.3145	1.84957	0.0440476	0.413932	24	0	1.81043	0.139519	1	24	1.49062	9.48551	0.00440667	0.119557	24	0.264719	8.15535	2.05863	0.252427	8.99007	10.3737	8.03627	6.50702	5.98751	7.02369	8.62514	9.6994
Bbs5	0.00788304	0.367326	24	21.8983	0.312523	0.0440476	0.413932	24	0	0.251788	0.231833	1	24	7.73643e-05	2.81727	0.0044165	0.119557	24	23.3075	2.28889	0.300086	0.131105	2.82949	2.46504	2.31143	1.96657	1.90647	2.19698	2.40509	2.23006
Ppp3cc	0.028958	0.493594	24	10.5988	0.488827	0.0138889	0.278415	24	10.5	0.425775	0.200357	1	24	11.4969	2.79119	0.0044202	0.119557	24	10.8645	2.20617	0.490541	0.22235	1.83917	2.23394	1.98891	2.92093	2.71076	2.33013	1.85219	1.7733
Pgm2l1	0.197553	0.751776	24	13.2544	1.27806	0.0031746	0.18868	24	15	2.0706	0.129436	1	24	13.4792	8.9562	0.00444653	0.11985	24	13.9076	6.95644	2.07837	0.29877	6.27633	4.26246	4.97227	7.89519	8.40039	9.22067	7.93402	6.69017
Cdc42ep4	0.03068	0.499907	24	9.83622	7.14955	0.0138889	0.278415	24	10.5	4.82624	0.190762	1	24	9.09924	47.9742	0.00445142	0.11985	24	9.81196	40.0152	7.30182	0.182476	32.1533	40.3906	40.7726	52.6346	43.0743	39.5124	37.5415	34.042
Mrm1	0.0481664	0.534374	24	11.7943	0.485121	0.0138889	0.278415	24	15	0.693444	0.12211	1	24	12.3592	3.69296	0.00446929	0.11985	24	13.0308	2.94531	0.610043	0.207124	2.3279	2.20826	2.41894	3.32581	3.664	3.59506	3.01327	3.00923
Snrpa	0.0275442	0.488561	24	21.8094	2.114	0.0138889	0.278415	24	0	1.70618	0.213875	1	24	20.9999	16.2891	0.00447507	0.11985	24	22.2577	14.6416	2.10496	0.143766	18.3017	13.7631	13.7611	12.9273	13.2857	13.5481	15.3981	16.1478
Defb1	0.276493	0.787279	24	2.55399	0.106517	0.0031746	0.18868	24	4.5	0.233628	0.0932188	1	24	3.92646	0.721159	0.00447524	0.11985	24	3.66303	0.488876	0.268291	0.268291	0.617344	0.718969	0.698806	0.549482	0.327675	0.266301	0.248802	0.483627
Sult1c2	0.0411419	0.52369	24	9.15201	1.95618	0.0138889	0.278415	24	9	2.06141	0.144353	1	24	7.70307	6.88621	0.00450454	0.120257	24	8.62051	4.39191	2.26621	0.515995	2.63657	4.2111	7.5256	6.27566	5.36195	3.36205	3.31736	2.445
Gfm2	0.0120521	0.4276	24	22.6135	3.89545	0.0440476	0.413932	24	0	3.42182	0.155751	1	24	7.73643e-05	52.0773	0.00451326	0.120257	24	23.5401	48.9459	3.96804	0.0810699	52.1655	49.8913	50.0721	43.2934	45.6064	47.2684	51.2532	52.0168
Spata2l	0.0144118	0.441005	24	9.67359	5.2536	0.0440476	0.413932	24	10.5	4.86474	0.130384	1	24	8.99844	20.5584	0.00451706	0.120257	24	9.72368	14.9884	5.39611	0.36002	9.72316	17.2552	16.9864	21.2563	20.2265	13.082	11.1408	10.2368
Coro1b	0.0121538	0.4276	24	9.57273	5.48828	0.0440476	0.413932	24	12	5.01215	0.156892	1	24	9.50924	42.0068	0.004571	0.120436	24	10.3476	36.0427	5.38128	0.149303	29.8897	34.8186	39.4019	41.3268	42.1807	35.4513	30.962	34.3106
Nme4	0.0551106	0.554576	24	8.92945	0.370826	0.0138889	0.278415	24	7.5	0.538049	0.109939	1	24	6.19275	1.77756	0.00457795	0.120436	24	7.53983	1.19431	0.508431	0.42571	0.964599	1.592	1.80077	1.59061	1.28091	0.932054	0.82934	0.564231
Eif2ak1	0.0554125	0.554576	24	8.92413	1.69598	0.0138889	0.278415	24	9	2.42662	0.1094	1	24	8.14414	30.7714	0.00457999	0.120436	24	8.68988	28.0212	1.95797	0.0698745	28.3078	29.0412	30.4249	31.0023	28.6864	25.7979	25.599	25.3098
Invs	0.0315013	0.50187	24	21.2448	2.604	0.0138889	0.278415	24	22.5	2.24114	0.192523	1	24	18.1323	18.548	0.00458159	0.120436	24	20.6619	16.8634	2.99037	0.177329	19.8707	16.9985	15.5887	13.1008	15.222	16.9767	19.7659	17.3837
Mlycd	0.0147177	0.441005	24	11.4962	5.79257	0.0440476	0.413932	24	13.5	5.41366	0.13032	1	24	12.1763	63.8969	0.00459265	0.120436	24	12.3884	56.9541	6.60184	0.115915	53.0144	51.6374	56.9258	59.1416	65.0583	62.614	54.9023	52.3392
Gch1	0.00619934	0.351388	24	9.97286	37.6898	0.113095	0.577886	24	10.5	40.0032	0.120577	1	24	9.21085	150.013	0.00459504	0.120436	24	9.89494	110.304	38.3018	0.34724	84.5375	100.425	147.663	136.387	152.935	108.484	75.6911	76.3056
Rhbdd2	0.0135704	0.438527	24	11.0742	3.26736	0.0440476	0.413932	24	13.5	2.81469	0.141875	1	24	11.3	13.9045	0.00460676	0.120436	24	11.9475	10.0316	3.49325	0.348223	7.87113	6.67614	9.46076	13.4189	14.5964	10.8185	9.5927	7.81863
Rps19	0.135609	0.699783	24	12.3764	14.828	0.0031746	0.18868	24	15	12.3482	0.197049	1	24	13.5926	112.41	0.00460789	0.120436	24	13.655	90.1709	21.597	0.239512	78.0683	76.4161	79.1801	93.6722	105.481	122.399	85.0626	81.0881
Mvd	0.00567568	0.346331	24	22.1498	5.53137	0.113095	0.577886	24	0	5.79424	0.132161	1	24	20.9999	17.8905	0.004608	0.120436	24	22.377	13.7908	5.52531	0.400651	17.5943	18.308	9.91767	7.43247	8.84722	13.5148	17.1673	17.5449
Nat10	0.0112921	0.416302	24	22.7566	5.98965	0.0440476	0.413932	24	22.5	5.08176	0.171075	1	24	20.9999	32.9733	0.00461934	0.120436	24	22.089	23.8566	5.94298	0.249112	27.3818	26.6275	17.9002	19.7813	20.3754	20.4719	25.2672	33.0478
Zfp422	0.0142303	0.441005	24	23.0694	1.43503	0.0440476	0.413932	24	1.5	1.43896	0.135833	1	24	7.73643e-05	12.4022	0.00462156	0.120436	24	0.186568	10.6173	1.55927	0.146861	12.2697	12.0684	10.9659	9.13875	9.53236	8.75465	11.0855	11.1234
Neu2	0.0479851	0.534374	24	20.9963	0.689539	0.0138889	0.278415	24	19.5	0.752268	0.128583	1	24	20.9999	2.31454	0.00464587	0.120796	24	20.5016	1.57486	0.816279	0.518318	2.25073	1.18116	0.618174	0.896523	1.42985	1.53123	2.48802	2.20319
Gatsl3	0.0126533	0.432992	24	10.1536	0.345859	0.0440476	0.413932	24	10.5	0.316395	0.154057	1	24	10.562	1.59267	0.00465322	0.120796	24	10.4052	1.18413	0.345247	0.291562	0.913154	1.07845	1.20947	1.61953	1.60859	1.16507	0.884629	0.994122
Ptdss2	0.0127894	0.435451	24	10.2958	1.0846	0.0440476	0.413932	24	10.5	1.03716	0.15393	1	24	11.4776	7.64155	0.00469053	0.121532	24	10.7568	6.60977	1.07988	0.163377	5.54323	7.21536	6.90743	7.40355	7.8642	6.79068	5.86067	5.29303
Slc5a6	0.0128289	0.435699	24	10.7669	5.99531	0.0440476	0.413932	24	12	4.79753	0.155205	1	24	10.9055	14.6655	0.00473368	0.122276	24	11.2228	7.66896	6.09286	0.794484	3.78123	3.54349	6.31613	16.4845	13.3751	9.65341	4.89311	3.30478
Asl	0.238117	0.777332	24	13.9648	83.0251	0.0031746	0.18868	24	16.5	127.134	0.11613	1	24	14.9782	624.426	0.00473728	0.122276	24	15.1445	450.703	184.722	0.409854	387.602	301.299	351.446	398.693	562.081	648.909	536.555	419.036
Slc4a2	0.0290393	0.493667	24	9.55858	2.43052	0.0138889	0.278415	24	10.5	1.45577	0.218447	1	24	9.02099	32.2577	0.0047512	0.122402	24	9.69235	29.7495	2.50066	0.0840573	26.2242	29.7858	30.4787	33.6919	30.3844	30.0587	28.9993	28.3728
Polr3c	0.0420484	0.524288	24	9.66631	1.10629	0.0138889	0.278415	24	9	1.11742	0.153529	1	24	10.0613	13.0068	0.00481893	0.123719	24	9.57616	11.7798	1.14884	0.0975261	11.5109	12.2995	12.5785	13.014	12.8985	11.6507	9.5927	10.6935
Abhd15	0.10977	0.663029	24	11.2388	5.61931	0.0031746	0.18868	24	13.5	3.38183	0.257405	1	24	12.0904	44.6358	0.00482057	0.123719	24	12.2736	36.7415	6.22643	0.169466	30.8929	31.2751	35.7735	36.6707	49.8661	38.9798	35.3299	35.1435
Rps27rt	0.0505445	0.541803	24	11.795	0.780794	0.0138889	0.278415	24	15	0.748499	0.128905	1	24	14.1894	4.95119	0.00485498	0.124366	24	13.6773	3.8588	1.067	0.276512	2.88094	2.8502	3.73592	3.90421	4.79597	5.25945	3.87025	3.57346
R3hcc1	0.0531644	0.546609	24	8.83159	0.991509	0.0138889	0.278415	24	7.5	1.27436	0.123419	1	24	8.01957	7.19611	0.00488267	0.12484	24	8.11656	5.9248	1.25218	0.211345	5.10595	6.36801	7.25683	6.85406	6.82159	4.99314	4.92075	5.07808
Cep44	0.0148948	0.441005	24	21.7998	1.6213	0.0440476	0.413932	24	21	1.36917	0.140319	1	24	20.9999	10.2417	0.00492279	0.125409	24	21.2661	8.86271	1.71809	0.193855	10.0704	9.24388	7.79437	6.65162	8.1025	8.28862	10.8091	9.94122
Agl	0.0131307	0.436442	24	10.5111	10.3505	0.0440476	0.413932	24	12	10.1753	0.159196	1	24	10.994	77.4888	0.00492343	0.125409	24	11.1673	69.2388	10.4025	0.150241	57.6187	64.2963	78.8575	71.8375	79.9824	75.7294	66.2366	59.3518
Pim3	0.00620547	0.351388	24	10.7757	22.8839	0.113095	0.577886	24	12	20.1582	0.132366	1	24	10.53	64.1116	0.00495883	0.125797	24	11.1	38.465	23.1702	0.602373	22.9446	17.1012	43.7022	58.7946	69.6458	42.0423	31.3767	22.1125
Gclc	0.0134793	0.438527	24	22.7193	67.5727	0.0440476	0.413932	24	0	51.4046	0.156611	1	24	7.73643e-05	347.582	0.00496267	0.125797	24	23.5749	287.039	69.3635	0.241652	351.41	304.355	313.656	196.715	212.363	275.655	297.678	344.477
Hpn	0.010213	0.407555	24	9.89574	31.2662	0.0440476	0.413932	24	12	23.1743	0.206897	1	24	11.0838	280.55	0.00496652	0.125797	24	10.9944	248.076	30.3102	0.122181	198.412	236.746	256.032	269.969	292.792	249.691	237.081	243.882
Fv1	0.0140599	0.438527	24	23.1182	0.488873	0.0440476	0.413932	24	0	0.40617	0.150817	1	24	0.158023	1.87231	0.0049806	0.125918	24	23.7594	1.52148	0.517264	0.339973	1.90348	1.69471	1.74701	1.07004	0.804293	1.33151	1.68632	1.93451
Arih2	0.0137142	0.438527	24	10.2375	8.54338	0.0440476	0.413932	24	10.5	7.52365	0.155136	1	24	9.47876	53.8675	0.00499407	0.125942	24	10.0726	43.2767	8.60519	0.198841	38.9698	37.9256	45.6105	56.3653	50.6704	43.0742	36.5463	37.0512
Irak2	0.0130851	0.436442	24	21.9593	4.29027	0.0440476	0.413932	24	0	3.79357	0.162964	1	24	20.6345	25.5226	0.00500325	0.125942	24	22.1898	22.994	4.30086	0.187042	27.3818	24.6504	21.3673	18.3932	17.3668	24.8326	24.355	25.6054
Aftph	0.0390896	0.51547	24	23.3844	2.69301	0.0138889	0.278415	24	1.5	2.24545	0.173271	1	24	6.33404e-05	48.979	0.00500941	0.125942	24	0.291048	46.3801	3.01836	0.0650788	49.4132	46.9384	47.7607	45.4624	41.7041	44.6054	46.4983	48.6582
Atp5b	0.144957	0.706234	24	12.4231	117.259	0.0031746	0.18868	24	15	106.96	0.205411	1	24	13.4516	1165.85	0.00502899	0.1262	24	13.6215	990.032	170.5	0.172216	911.456	855.701	916.134	1009.34	1121.93	1241.5	938.564	925.635
Pemt	0.142682	0.704883	24	12.2895	20.8712	0.0031746	0.18868	24	13.5	12.2822	0.209511	1	24	13.8258	184.517	0.00504501	0.126368	24	13.207	151.773	27.9799	0.184354	131.353	136.809	139.546	146.307	183.647	192.669	144.996	138.855
Zmym6	0.0135332	0.438527	24	22.196	2.54843	0.0440476	0.413932	24	0	2.55993	0.159929	1	24	7.73643e-05	11.5324	0.00506365	0.126451	24	23.4037	8.57887	2.51185	0.292795	11.7553	8.26814	7.44497	7.14326	5.98751	6.82396	10.8367	10.3711
Adcy6	0.0122505	0.4276	24	10.3768	4.60561	0.0440476	0.413932	24	13.5	4.10903	0.17682	1	24	9.49085	30.3737	0.005067	0.126451	24	11.0868	25.4038	4.59626	0.180928	19.4335	21.1069	27.1459	29.4985	31.0993	24.9324	27.23	22.7842
Stk35	0.0138731	0.438527	24	10.9114	5.42905	0.0440476	0.413932	24	12	4.25238	0.1565	1	24	11.1281	20.942	0.00507646	0.126454	24	11.3458	14.4909	5.56865	0.384286	11.1894	10.8359	12.8473	21.8058	20.852	15.5786	12.6889	10.1293
Smad9	0.0140001	0.438527	24	10.8206	4.18359	0.0440476	0.413932	24	10.5	3.96251	0.155788	1	24	9.41175	15.9851	0.00509512	0.126581	24	10.2455	12.1612	4.14822	0.341104	7.99975	9.60337	13.8955	16.1085	15.4007	13.2485	14.1817	6.85138
Dhps	0.219155	0.767189	24	13.4283	1.18224	0.0031746	0.18868	24	15	1.58153	0.138451	1	24	14.1513	10.6084	0.00510604	0.126581	24	14.1929	8.52048	2.07107	0.24307	7.89685	6.23962	7.01494	8.41575	10.2771	11.1181	8.81865	8.38286
Aamdc	0.0135684	0.438527	24	11.2786	1.87934	0.0440476	0.413932	24	10.5	1.87742	0.161309	1	24	11.9677	13.0329	0.00510957	0.126581	24	11.249	10.9767	1.92684	0.175539	9.67172	10.3994	10.5627	12.8694	12.3325	13.0488	10.0627	8.86649
Ankrd13a	0.0453904	0.532927	24	21.5744	2.28217	0.0138889	0.278415	24	21	2.38843	0.154457	1	24	20.9999	23.3865	0.0051508	0.127369	24	21.1913	20.1923	2.45058	0.121362	21.6585	19.1554	18.2227	16.282	20.5839	19.8394	22.4751	23.3216
Phykpl	0.0154122	0.441005	24	10.0255	1.41073	0.0440476	0.413932	24	9	1.44065	0.144608	1	24	7.76569	13.7788	0.00518478	0.127976	24	8.93144	12.5112	1.50972	0.120669	11.3823	13.4036	13.0085	14.3733	13.1666	12.9489	11.1132	10.6935
Gm1673	0.142088	0.704883	24	11.9458	0.018479	0.0031746	0.18868	24	13.5	0.0136194	0.218523	1	24	13.8321	0.0910119	0.0052018	0.128163	24	13.0967	0.0624735	0.0237505	0.0237505	0.038584	0.0513549	0.0537543	0.0578402	0.0893659	0.0998629	0.0552893	0.0537363
Ddx46	0.0444343	0.529901	24	9.61658	6.51629	0.0138889	0.278415	24	9	7.20478	0.160688	1	24	8.94006	41.9407	0.0052272	0.128555	24	9.18532	32.472	6.99256	0.215341	30.4556	31.8914	36.096	44.0453	37.8613	26.9297	26.6495	25.8472
Get4	0.0140715	0.438527	24	10.4883	2.34629	0.0440476	0.413932	24	12	2.5196	0.161652	1	24	11.7302	13.4797	0.00527081	0.129297	24	11.4082	11.3382	2.36387	0.208487	8.79715	10.6305	13.0892	12.0597	13.7623	13.3151	9.64799	9.40385
D3Ertd254e	0.0173039	0.449912	24	23.2582	1.33563	0.0440476	0.413932	24	3	1.75151	0.131629	1	24	7.73643e-05	9.90165	0.00527644	0.129297	24	0.721825	7.80488	1.54137	0.197487	9.78747	9.65472	8.76195	6.24674	6.61307	6.09164	7.49171	7.79177
Cdk18	0.0345136	0.506856	24	10.4965	6.44798	0.0138889	0.278415	24	9	3.69916	0.209788	1	24	10.0089	27.8623	0.00528641	0.129307	24	9.83624	19.7836	6.47782	0.327434	16.6297	17.2809	19.1634	28.602	28.9545	17.1098	16.4762	14.052
Dnajc7	0.0190122	0.453111	24	23.4291	3.52141	0.0440476	0.413932	24	3	3.76279	0.120956	1	24	7.73643e-05	35.6361	0.00531734	0.129829	24	0.779901	31.6123	4.1577	0.131522	35.3301	35.7173	32.3332	30.048	27.0183	26.9963	32.676	32.7792
Evi5	0.0180183	0.452114	24	23.3426	35.0405	0.0440476	0.413932	24	3	37.6637	0.128287	1	24	1.44895	222.036	0.00533945	0.130135	24	1.27133	187.404	42.9713	0.229297	218.462	221.879	207.841	155.474	138.189	158.715	197.189	201.484
Colgalt1	0.181038	0.733968	24	12.8484	5.24375	0.0031746	0.18868	24	15	5.20207	0.178315	1	24	14.2954	60.2995	0.00536753	0.130275	24	14.0512	51.2655	8.56258	0.167024	46.6223	46.091	46.2018	50.2053	58.2367	63.3464	50.9768	48.4433
Polg	0.0133969	0.438527	24	9.59139	5.72954	0.0440476	0.413932	24	12	4.72757	0.173835	1	24	9.18651	54.8701	0.00537171	0.130275	24	10.2445	49.2443	5.66246	0.114987	40.899	49.5575	52.7867	53.7914	55.7047	47.8343	47.3553	46.0252
Slc12a4	0.0153778	0.441005	24	10.8742	4.7181	0.0440476	0.413932	24	13.5	4.58363	0.151526	1	24	11.0185	23.7282	0.00537406	0.130275	24	11.783	18.4001	4.93378	0.268138	14.1603	13.7118	16.9595	25.4208	22.2223	21.0711	17.8032	15.8522
mt-Nd4	0.0243764	0.482512	24	21.7382	120.206	0.0138889	0.278415	24	0	137.207	0.306231	1	24	7.73643e-05	661.975	0.00541793	0.130834	24	23.2562	446.353	113.699	0.254728	644.738	579.848	386.09	340.129	333.692	366.33	528.013	391.98
Pklr	0.0193051	0.453111	24	11.6679	128.092	0.0440476	0.413932	24	13.5	128.608	0.122151	1	24	12.1813	389.198	0.00542603	0.130834	24	12.4472	230.327	148.419	0.644383	135.16	114.111	168.708	313.494	427.675	307.944	253.004	122.519
Ndufa7	0.205268	0.758751	24	13.3426	7.38833	0.0031746	0.18868	24	15	9.04998	0.159431	1	24	14.1707	63.3972	0.00542696	0.130834	24	14.1711	50.6842	12.8176	0.252891	47.304	39.0297	42.1702	49.8583	61.0071	66.9414	51.3914	47.7716
Myo1b	0.00645579	0.351388	24	22.5381	38.3	0.113095	0.577886	24	1.5	32.762	0.142795	1	24	7.73643e-05	301.912	0.00544231	0.130834	24	0.0124075	253.239	39.2825	0.155121	300.994	273.388	246.329	222.974	220.019	213.474	279.46	269.273
Minpp1	0.0151318	0.441005	24	9.90431	3.98711	0.0440476	0.413932	24	12	3.63455	0.157067	1	24	9.47029	33.1832	0.0054604	0.130834	24	10.4483	29.2798	3.94722	0.134811	25.1182	28.2709	33.0589	31.118	34.525	29.0601	26.6218	26.4651
Eml4	0.00700153	0.360752	24	22.8402	5.09397	0.113095	0.577886	24	0	5.56169	0.132287	1	24	7.73643e-05	32.1049	0.00546303	0.130834	24	23.6148	26.1497	5.27351	0.201666	31.3816	30.0426	23.1143	22.5577	23.1458	21.1376	26.7047	31.1133
Fkbp8	0.171239	0.726278	24	12.5014	29.9673	0.0031746	0.18868	24	15	27.6131	0.192964	1	24	14.5115	238.238	0.00546923	0.130834	24	14.0132	188.593	46.9846	0.249132	159.558	152.935	175.051	182.428	221.478	260.476	183.948	172.87
Galk1	0.175654	0.729876	24	12.6628	7.10129	0.0031746	0.18868	24	15	5.89869	0.188614	1	24	13.9399	46.0457	0.00548093	0.130834	24	13.8687	34.2792	11.0218	0.32153	28.8994	25.1382	29.8336	31.0602	47.1256	47.7012	33.1736	31.3014
Coasy	0.0389714	0.51547	24	11.2503	12.4014	0.0138889	0.278415	24	12	12.5041	0.194597	1	24	12.3981	104.536	0.00548731	0.130834	24	11.8833	90.483	13.3187	0.147195	80.0232	82.1679	95.0376	91.2718	107.001	105.455	82.464	80.4433
Amdhd2	0.0153098	0.441005	24	10.8567	2.67913	0.0440476	0.413932	24	12	2.76939	0.156415	1	24	13.9877	15.5285	0.00549364	0.130834	24	12.2733	13.2077	2.87136	0.2174	10.2119	11.6319	15.1587	14.0841	15.3411	16.0114	12.7442	10.4786
Ache	0.0424198	0.525501	24	21.9281	0.077161	0.0138889	0.278415	24	19.5	0.0889868	0.179571	1	24	20.9999	0.412964	0.00550691	0.130898	24	20.8126	0.239692	0.0838623	0.0838623	0.244365	0.179742	0.134386	0.144601	0.20852	0.299589	0.276447	0.429891
Nt5dc2	0.233621	0.775107	24	13.2717	0.683185	0.0031746	0.18868	24	16.5	0.829194	0.142931	1	24	14.8974	4.91599	0.00551565	0.130898	24	14.8899	3.8234	1.35821	0.355235	3.44684	2.0542	3.1715	4.25125	4.31935	5.1263	4.6443	3.57346
Mid2	0.254879	0.777665	24	1.1856	0.613837	0.0031746	0.18868	24	4.5	0.985454	0.131311	1	24	2.69703	8.93146	0.00552583	0.13091	24	2.79101	7.73901	1.18884	0.153617	8.64281	9.1155	8.68132	7.57707	7.26842	5.85862	7.32584	7.44248
Slc29a3	0.0154698	0.441005	24	22.2062	0.647253	0.0440476	0.413932	24	21	0.561975	0.156554	1	24	20.9999	3.5366	0.00554376	0.130983	24	21.4005	2.82133	0.667914	0.236738	3.18961	3.13265	2.25768	2.11117	2.53203	2.39671	3.53852	3.41226
Imp3	0.0194465	0.453111	24	11.635	3.4791	0.0440476	0.413932	24	13.5	3.10174	0.124665	1	24	12.2979	24.5949	0.00554824	0.130983	24	12.4759	20.4523	4.03721	0.197396	18.2116	16.2538	20.2116	22.2974	24.6352	24.4331	19.6277	17.9479
Gabarapl1	0.227348	0.772198	24	7.43358	29.504	0.0031746	0.18868	24	7.5	37.5328	0.149072	1	24	6.08708	245.333	0.00558194	0.131549	24	7.00912	187.106	49.5154	0.264638	165.744	209.425	263.1	213.662	178.225	155.287	149.281	162.122
Adgrg2	0.00559935	0.346331	24	11.1667	0.447392	0.113095	0.577886	24	12	0.422456	0.170587	1	24	10.4862	1.34224	0.00560009	0.131552	24	11.2173	0.89185	0.457728	0.457728	0.823125	0.539227	1.10196	1.27248	1.34049	1.09849	0.663472	0.29555
Nudt8	0.229295	0.772198	24	13.7159	1.68959	0.0031746	0.18868	24	15	2.19868	0.148448	1	24	14.529	15.7702	0.00560147	0.131552	24	14.4155	12.6435	3.16523	0.250344	11.7938	10.1939	10.2671	12.1175	15.1326	16.4441	13.2694	11.9295
Kat2b	0.0137698	0.438527	24	10.6604	16.3267	0.0440476	0.413932	24	10.5	15.8753	0.181534	1	24	9.65931	130.649	0.00568663	0.133321	24	10.2739	110.537	16.2802	0.147283	109.424	100.399	115.437	132.685	128.121	109.317	96.701	92.2115
Prickle4	0.049563	0.53812	24	21.3672	0.117377	0.0138889	0.278415	24	21	0.106284	0.160909	1	24	18.6811	0.633304	0.00571403	0.133667	24	20.3625	0.519697	0.13877	0.13877	0.57876	0.539227	0.430034	0.318121	0.476618	0.532602	0.691117	0.591099
Itgae	0.0168016	0.445928	24	22.0616	0.258349	0.0440476	0.413932	24	21	0.255672	0.1499	1	24	20.9999	0.89933	0.00572112	0.133667	24	21.3528	0.558927	0.269238	0.269238	0.720234	0.462194	0.37628	0.375961	0.297886	0.466027	0.939919	0.832913
Armc9	0.00745472	0.367326	24	22.9848	1.2362	0.113095	0.577886	24	0	1.32103	0.132143	1	24	7.73643e-05	5.72669	0.00574071	0.133894	24	23.6625	4.51849	1.29227	0.285995	5.59468	5.36659	4.16596	3.49933	3.72358	3.09575	5.08662	5.61544
Rorc	0.34044	0.788912	24	17.7026	28.5828	0.0031746	0.18868	24	18	59.3984	0.104504	1	24	16.8602	162.428	0.00580419	0.134936	24	17.5216	102.073	72.2633	0.70796	105.476	31.3008	37.7086	74.9031	121.091	150.826	172.945	122.331
Tmem41a	0.291631	0.788912	24	14.0377	0.687826	0.0031746	0.18868	24	16.5	1.04479	0.122404	1	24	15.1132	6.47016	0.00581985	0.134936	24	15.2151	5.00661	1.55853	0.311295	4.46288	3.36375	4.08533	4.80074	5.65984	6.9904	5.61187	5.07808
Shq1	0.0369016	0.511302	24	9.9963	0.683191	0.0138889	0.278415	24	12	0.64182	0.221819	1	24	11.6732	5.67651	0.00583489	0.134936	24	11.2282	4.89417	0.663461	0.135561	4.0256	4.95575	5.02603	5.35022	5.80878	5.19287	4.11906	4.67506
2510009E07Rik	0.0156115	0.441005	24	22.35	2.2263	0.0440476	0.413932	24	22.5	2.27268	0.165345	1	24	7.73643e-05	12.2041	0.00583539	0.134936	24	22.9467	10.9473	2.21884	0.202683	12.2183	10.7332	9.97142	8.84955	9.11532	9.45369	14.0988	13.1385
Gys2	0.00786553	0.367326	24	11.2246	94.4854	0.113095	0.577886	24	12	94.5457	0.127958	1	24	11.4306	284.755	0.00584058	0.134936	24	11.5515	183.393	98.8914	0.539233	130.131	89.1778	177.389	292.18	266.102	249.557	164.375	98.23
Alg1	0.0395774	0.515635	24	11.0174	1.89034	0.0138889	0.278415	24	12	1.46935	0.207275	1	24	11.9247	16.7639	0.00584515	0.134936	24	11.6481	14.1992	1.97735	0.139257	12.5655	13.7888	13.4117	15.3566	17.5753	14.9794	12.993	12.9236
Haus2	0.00576554	0.347515	24	11.4164	1.32076	0.113095	0.577886	24	12	1.11683	0.175336	1	24	11.7924	10.954	0.00586133	0.13508	24	11.7363	9.46886	1.40881	0.148783	9.15726	8.83304	9.51451	10.3823	11.1707	10.2193	8.73572	7.73803
Rasl11a	0.0146339	0.441005	24	22.8128	0.234664	0.0440476	0.413932	24	22.5	0.182684	0.178334	1	24	7.73643e-05	0.482553	0.00588698	0.135321	24	23.1025	0.324109	0.237805	0.237805	0.514453	0.256775	0.37628	0.0578402	0.0893659	0.266301	0.387025	0.644836
Stx4a	0.0667803	0.581746	24	0.236434	2.93692	0.0138889	0.278415	24	3	3.34646	0.124062	1	24	2.73852	14.7913	0.00589175	0.135321	24	2.00738	11.3415	4.45638	0.392926	13.26	16.2025	13.4117	8.76279	8.51954	7.28999	10.2009	13.0848
Gfod2	0.019647	0.453111	24	21.2678	2.0218	0.0440476	0.413932	24	22.5	1.88578	0.133527	1	24	19.5254	7.71955	0.00591179	0.135393	24	21.1022	6.23504	2.20338	0.353386	8.02547	6.8302	3.97782	3.47041	5.45132	6.7241	7.85109	7.54995
Gpd1l	0.0555028	0.554593	24	11.9407	7.44038	0.0138889	0.278415	24	13.5	7.0522	0.15	1	24	12.7427	42.1468	0.00591488	0.135393	24	12.7279	32.4196	9.07255	0.279848	27.7933	22.2367	31.2044	34.0968	42.8956	42.6415	30.4921	27.9966
Timm50	0.0457534	0.532927	24	11.548	2.67564	0.0138889	0.278415	24	12	2.44119	0.182654	1	24	12.7957	21.0855	0.00593292	0.135577	24	12.1141	17.7645	2.97129	0.167261	15.3307	16.2538	17.5777	18.3064	20.9116	21.87	16.2551	15.6104
Prpf39	0.279503	0.78853	24	1.73351	1.92387	0.0031746	0.18868	24	4.5	2.73287	0.131177	1	24	3.54914	26.606	0.00594627	0.135653	24	3.26733	23.1603	4.26622	0.184204	24.7066	27.7573	25.3451	23.7434	21.1201	17.7423	21.9222	22.9454
Acmsd	0.0152912	0.441005	24	22.313	19.2441	0.0440476	0.413932	24	21	20.7615	0.173177	1	24	20.9999	66.8678	0.00595636	0.135655	24	21.4357	38.9697	19.7084	0.505736	39.7801	35.7687	31.8225	15.6458	12.9283	49.4987	60.4865	65.827
Ppp1r16a	0.0133701	0.438527	24	9.89247	2.43854	0.0440476	0.413932	24	10.5	2.10608	0.198531	1	24	10.0953	21.4676	0.00596776	0.135686	24	10.1625	18.6095	2.44483	0.131376	15.6651	17.1269	18.7871	21.8636	21.2691	18.6744	17.112	18.3778
Pafah1b1	0.0198811	0.453111	24	23.2378	9.94634	0.0440476	0.413932	24	1.5	10.5973	0.134346	1	24	7.73643e-05	101.036	0.00599765	0.136008	24	0.242311	89.2791	10.9912	0.123111	100.576	99.5772	92.9681	82.7693	76.4972	76.8279	93.8536	91.1637
Snta1	0.190306	0.744738	24	12.7562	2.16247	0.0031746	0.18868	24	16.5	1.70708	0.195021	1	24	13.8546	15.3165	0.00600468	0.136008	24	14.3486	11.6515	3.69537	0.317159	10.0061	9.08982	9.97142	10.6137	15.6986	15.7783	11.3067	10.7473
Ppp1r7	0.340259	0.788912	24	6.14007	1.07488	0.0031746	0.18868	24	6	2.13142	0.109241	1	24	5.59739	17.4592	0.00601203	0.136008	24	5.91256	14.8362	2.46871	0.166398	15.1378	16.4592	17.9539	16.1663	14.2092	12.1167	13.1589	13.4878
Irgq	0.0169144	0.445928	24	22.0991	3.60425	0.0440476	0.413932	24	21	3.25557	0.159679	1	24	20.9999	22.4556	0.00605155	0.136674	24	21.3652	18.8172	3.74673	0.199113	21.517	21.0812	14.8362	15.3855	17.2774	16.6771	21.8116	21.9513
Rap2b	0.0436251	0.527824	24	22.1049	0.298188	0.0138889	0.278415	24	21	0.32638	0.196785	1	24	20.9999	2.83261	0.00606238	0.136691	24	21.3671	2.27282	0.309855	0.136331	2.26359	2.20826	1.96203	1.85089	2.05541	2.56315	2.37744	2.90176
G6pc3	0.245592	0.777332	24	7.63559	0.318283	0.0031746	0.18868	24	7.5	0.359511	0.153327	1	24	6.17631	3.2591	0.00607501	0.136746	24	7.10623	2.67981	0.518244	0.193388	2.58513	2.82452	3.54778	2.89201	2.74055	2.33013	2.07335	2.445
9030617O03Rik	0.0175201	0.451538	24	9.80312	3.50043	0.0440476	0.413932	24	10.5	3.69171	0.15587	1	24	8.99397	32.6194	0.00610541	0.136746	24	9.76594	28.1528	3.58532	0.127352	25.3368	26.0626	31.4194	32.4773	30.9206	26.5968	27.3406	25.068
Cidec	0.0668851	0.581746	24	12.1513	0.564371	0.0138889	0.278415	24	15	0.603291	0.129702	1	24	13.2108	1.88572	0.00611356	0.136746	24	13.4482	1.06558	0.778397	0.730491	0.565898	0.359484	0.779437	1.07004	1.99584	1.89739	1.0505	0.806045
Afg3l2	0.00735639	0.367326	24	10.5477	8.58403	0.113095	0.577886	24	12	7.51317	0.144867	1	24	11.4914	63.9996	0.00611507	0.136746	24	11.3472	53.9952	8.66951	0.160561	48.41	52.8956	54.9369	61.3685	65.8626	55.9565	45.8349	46.6969
Fn3k	0.0154355	0.441005	24	10.742	1.79526	0.0440476	0.413932	24	10.5	1.57769	0.177337	1	24	11.7982	11.8158	0.00611692	0.136746	24	11.0122	10.2194	1.81183	0.177292	8.5142	10.6305	11.1271	10.7294	12.4219	11.0848	9.50977	7.73803
Zfyve1	0.268687	0.783457	24	19.286	5.10943	0.0031746	0.18868	24	19.5	7.17744	0.141597	1	24	17.2519	81.7532	0.00612538	0.136746	24	18.6877	71.9229	9.33458	0.129786	72.6279	66.4276	63.5107	65.4462	69.2585	79.5574	85.3391	73.2157
Akap7	0.0658525	0.578333	24	9.16496	0.985424	0.0138889	0.278415	24	7.5	1.36831	0.132828	1	24	6.67132	7.08688	0.00615417	0.136977	24	7.77373	5.63299	1.27659	0.226628	5.15739	6.44504	7.1762	6.7673	6.07688	4.59369	5.05897	3.78841
Shtn1	0.0231134	0.477454	24	23.5321	5.77747	0.0440476	0.413932	24	1.5	7.04441	0.11937	1	24	7.73643e-05	45.9074	0.00615592	0.136977	24	0.340295	38.304	6.56534	0.171401	46.6094	41.3664	42.0359	36.0344	30.3248	31.0906	37.4862	41.4844
Flot2	0.0186755	0.453111	24	11.7236	3.00765	0.0440476	0.413932	24	13.5	2.85711	0.148184	1	24	12.0738	24.256	0.00617089	0.137034	24	12.4293	20.475	3.48753	0.170331	19.202	17.9229	19.4322	22.5288	24.4862	23.1682	19.4342	17.6255
Uqcrc1	0.0581164	0.561286	24	12.1317	28.3899	0.0138889	0.278415	24	13.5	23.5205	0.151461	1	24	12.6844	224.91	0.00618538	0.137034	24	12.7716	184.88	35.1722	0.190243	166.181	158.841	167.982	191.654	227.555	224.725	177.672	164.433
Klf1	0.0189946	0.453111	24	9.45006	1.22287	0.0440476	0.413932	24	9	1.0978	0.146224	1	24	9.00696	3.84831	0.00618884	0.137034	24	9.15227	2.26405	1.3218	0.583821	1.26041	1.84878	3.09087	4.07773	3.18738	1.76424	1.24401	1.63896
Abcb11	0.0821003	0.623543	24	0.4667	161.384	0.0138889	0.278415	24	3	235.885	0.109407	1	24	2.97768	875.486	0.00628658	0.138971	24	2.16221	648.856	258.257	0.39802	794.277	900.534	847.221	516.137	458.179	414.631	549.742	710.125
Asb1	0.00789954	0.367326	24	10.2577	1.14244	0.113095	0.577886	24	12	1.18759	0.141059	1	24	11.4588	8.44984	0.00633776	0.139762	24	11.2407	7.32455	1.13216	0.15457	6.17344	7.16401	7.7675	8.41575	8.13229	8.22204	6.19241	6.52896
Tbl1x	0.385525	0.788912	24	4.17156	1.7271	0.0031746	0.18868	24	4.5	4.21203	0.103133	1	24	4.642	54.2784	0.00634585	0.139762	24	4.43789	50.1414	4.92476	0.0982175	52.1913	53.2037	55.125	51.4199	48.9725	44.9383	46.139	49.1419
Sf3a2	0.392103	0.788912	24	3.91655	0.295236	0.0031746	0.18868	24	4.5	0.822521	0.101551	1	24	4.37905	5.10806	0.0063533	0.139762	24	4.26531	4.21206	0.834947	0.198228	4.54005	5.18685	4.91852	4.62722	3.63421	3.46191	3.56616	3.76154
Trpm7	0.0481964	0.534374	24	9.85354	9.5902	0.0138889	0.278415	24	9	6.91211	0.190197	1	24	8.93872	91.0495	0.00638989	0.140339	24	9.26351	77.6893	10.1435	0.130564	74.6343	72.8213	84.4211	96.2461	80.1314	75.1635	70.5768	67.5197
Ccdc125	0.0604075	0.566318	24	23.8089	0.946485	0.0138889	0.278415	24	3	0.962064	0.152504	1	24	7.73643e-05	7.76266	0.00641533	0.140516	24	0.910016	6.70772	1.17286	0.174852	7.5496	8.16543	6.36988	6.65162	5.60026	5.52575	6.30298	7.49622
Zdhhc4	0.043455	0.527079	24	11.4689	1.08781	0.0138889	0.278415	24	12	0.747126	0.212136	1	24	12.0639	13.5366	0.00641867	0.140516	24	11.8444	12.2038	1.17323	0.096137	11.5495	11.5549	12.2291	12.32	14.239	12.7825	11.8319	11.1234
Loxl4	0.0426766	0.525501	24	23.484	4.71779	0.0138889	0.278415	24	0	4.00454	0.217307	1	24	7.73643e-05	8.07599	0.00644965	0.140634	24	23.8281	4.90803	5.08241	1.03553	6.80364	10.6561	2.2308	1.50385	1.34049	1.66438	3.53852	11.5264
Cxcl11	0.0170371	0.446557	24	23.0452	0.699824	0.0440476	0.413932	24	0	0.657318	0.171773	1	24	20.9999	3.80464	0.00645371	0.140634	24	22.6913	3.03145	0.69796	0.230239	3.31822	3.80026	2.66084	2.42929	2.26393	2.89602	3.04091	3.84215
Gpsm2	0.0213425	0.466147	24	23.2794	2.86557	0.0440476	0.413932	24	3	3.3847	0.137236	1	24	0.531207	18.5634	0.00645803	0.140634	24	0.919997	15.6343	3.37441	0.215834	18.4431	18.231	17.3626	12.5513	12.6006	12.4496	16.6974	16.7389
Egln2	0.015999	0.445683	24	10.0139	4.5361	0.0440476	0.413932	24	13.5	2.92561	0.184157	1	24	11.4373	44.4762	0.00648869	0.140634	24	11.6426	39.941	4.37715	0.10959	34.2883	38.1567	42.5465	43.1199	44.1765	43.2739	35.3299	38.6364
Mfn1	0.0437709	0.528514	24	10.103	6.24847	0.0138889	0.278415	24	10.5	4.39493	0.213803	1	24	9.88926	58.3291	0.00649662	0.140634	24	10.164	50.1872	6.27918	0.125115	46.8152	47.7857	50.2871	59.4886	58.3559	47.8343	44.3144	46.6163
Pbx3	0.255188	0.777665	24	20.4801	0.177674	0.0031746	0.18868	24	18	0.358432	0.160454	1	24	20.9999	2.94614	0.00649704	0.140634	24	19.8434	2.46861	0.239037	0.0968307	2.41793	2.13123	1.93515	2.40037	2.50224	2.52986	2.93033	2.90176
Afg3l1	0.00388669	0.304485	24	10.1853	2.82668	0.249206	0.801565	24	12	2.61071	0.13442	1	24	11.3421	43.2969	0.00650545	0.140634	24	11.1774	40.7093	2.78831	0.0684932	37.2207	39.7487	42.5734	42.3101	43.4616	42.5083	38.7855	39.0663
Pxdc1	0.01903	0.453111	24	22.0489	13.0556	0.0440476	0.413932	24	22.5	14.1059	0.155374	1	24	20.5441	67.4449	0.0065071	0.140634	24	21.7015	55.2091	13.3763	0.242284	59.1107	63.2692	46.5243	36.6996	42.7467	60.0176	66.4301	66.8748
Zfp942	0.00415563	0.30557	24	21.8909	1.67456	0.113095	0.577886	24	1.5	1.33881	0.27826	1	24	7.73643e-05	18.9593	0.00652864	0.140789	24	23.805	15.0356	1.58433	0.105372	18.9833	16.562	14.7824	13.9684	12.8985	14.4801	14.1817	14.4282
Slc2a2	0.00778183	0.367326	24	10.8095	154.017	0.113095	0.577886	24	12	135.285	0.149015	1	24	10.5873	520.199	0.00654338	0.140789	24	11.1305	341.066	156.216	0.458024	273.908	244.321	346.85	517.41	540.455	345.526	264.864	195.197
Ccdc59	0.055005	0.554576	24	23.278	0.650116	0.0138889	0.278415	24	3	0.830741	0.171733	1	24	7.73643e-05	11.3224	0.00654543	0.140789	24	0.728535	10.0381	0.752271	0.0749413	11.1508	11.6062	10.1596	9.74607	8.93659	9.55355	9.39919	9.75314
Polq	0.0332432	0.504601	24	22.8688	0.167106	0.0138889	0.278415	24	21	0.118244	0.285336	1	24	20.9999	0.687557	0.00656721	0.140921	24	21.6173	0.309276	0.163805	0.163805	0.282949	0.282452	0.161263	0.11568	0.20852	0.366164	0.331736	0.72544
Serpina1d	0.016762	0.445928	24	11.2828	120.947	0.0440476	0.413932	24	10.5	113.731	0.178609	1	24	12.0016	2211.78	0.00657237	0.140921	24	11.2616	2097.15	124.112	0.0591812	2015.92	2050.11	2124.07	2185.87	2167.66	2249.81	2042.19	1941.55
Thrsp	0.0599792	0.566209	24	12.1158	425.277	0.0138889	0.278415	24	13.5	338.086	0.158782	1	24	12.7199	1110.55	0.00658835	0.141004	24	12.7783	512.208	527.039	1.02895	222.295	163.052	270.599	564	1218.59	1046.13	433.247	179.748
Mex3b	0.0835753	0.624058	24	20.6395	0.229731	0.0138889	0.278415	24	19.5	0.340608	0.114141	1	24	18.1006	0.949408	0.00659704	0.141004	24	19.415	0.61776	0.33016	0.33016	0.668789	0.513549	0.268771	0.347041	0.417041	0.898766	0.995208	0.832913
Hsbp1l1	0.0229887	0.47706	24	9.36566	0.307474	0.0440476	0.413932	24	9	0.318195	0.131174	1	24	8.74353	1.2931	0.00661041	0.141067	24	9.03635	0.897325	0.336963	0.336963	0.694512	0.770324	1.2901	1.27248	1.07239	0.798903	0.608183	0.671704
Xylt2	0.303356	0.788912	24	2.36336	1.12337	0.0031746	0.18868	24	4.5	1.65107	0.138494	1	24	4.28499	18.5827	0.00663225	0.141127	24	3.72317	16.7694	2.79885	0.166902	17.62	18.4107	18.6259	17.2653	15.788	13.5481	15.6745	17.2225
Fnip1	0.0477378	0.534374	24	9.87049	13.9181	0.0138889	0.278415	24	10.5	10.3525	0.201228	1	24	8.82524	80.465	0.00663403	0.141127	24	9.73302	63.1095	14.2785	0.226249	53.7732	58.2621	72.4339	89.3631	63.0923	63.1133	57.335	47.5029
Necap2	0.0481729	0.534374	24	10.9066	0.576035	0.0138889	0.278415	24	13.5	0.605853	0.200461	1	24	12.4918	7.90066	0.00666199	0.141499	24	12.3033	7.1204	0.621547	0.087291	5.8519	6.95859	6.61178	7.46139	7.89398	7.82259	7.2429	7.12006
Trim65	0.357774	0.788912	24	17.6941	0.891748	0.0031746	0.18868	24	18	1.72343	0.118552	1	24	16.3611	9.59369	0.00668297	0.141631	24	17.3543	7.93839	2.32724	0.293163	8.30842	5.88014	5.6442	7.14326	8.78764	9.58684	9.3439	8.81276
Slc17a8	0.289177	0.788912	24	19.5125	3.03201	0.0031746	0.18868	24	19.5	4.7	0.147199	1	24	17.8766	16.6635	0.00670209	0.141631	24	18.9668	11.4523	5.12811	0.44778	12.5269	6.2653	5.61732	8.15547	12.3027	12.6493	20.2912	13.8102
B230307C23Rik	0.052035	0.544663	24	21.6397	0.469084	0.0138889	0.278415	24	21	0.426825	0.187749	1	24	20.9999	2.87675	0.00672413	0.141631	24	21.213	2.34786	0.501829	0.213739	2.66229	2.59342	1.532	1.96657	2.17457	2.29685	2.70918	2.84802
1190005I06Rik	0.00717289	0.365211	24	11.0069	0.21432	0.113095	0.577886	24	12	0.20135	0.167421	1	24	9.86802	1.13767	0.00672919	0.141631	24	10.9589	0.918524	0.216325	0.216325	0.87457	0.744646	1.02133	1.1568	1.07239	1.03192	0.801695	0.644836
Eif6	0.064748	0.57668	24	12.0313	7.47563	0.0138889	0.278415	24	15	6.3021	0.151073	1	24	12.8171	45.4435	0.00673083	0.141631	24	13.2709	34.6996	9.92697	0.286083	28.0506	28.6304	29.8605	36.4682	45.1298	46.8024	32.4548	30.1998
Lgals9	0.379616	0.788912	24	3.59283	17.3407	0.0031746	0.18868	24	4.5	33.2859	0.113084	1	24	4.13528	195.615	0.00674765	0.141631	24	4.07618	155.071	48.0979	0.310167	160.651	208.732	186.178	162.82	142.3	110.382	121.194	148.312
Ptk6	0.00796527	0.367326	24	22.2766	0.856569	0.113095	0.577886	24	0	0.863263	0.15158	1	24	7.73643e-05	2.35077	0.00675825	0.141631	24	23.43	1.41015	0.849937	0.602729	2.26359	1.97716	1.20947	0.347041	0.804293	0.832191	2.10099	1.74643
Actb	0.0249869	0.482512	24	23.5615	99.6492	0.0440476	0.413932	24	1.5	107.161	0.124229	1	24	4.40768e-05	991.127	0.00676535	0.141631	24	0.350127	877.266	113.543	0.129429	1004.01	923.49	950.994	824.657	732.294	777.2	860.966	944.523
Maf	0.0437991	0.528514	24	22.5665	3.4752	0.0138889	0.278415	24	0	2.07384	0.225355	1	24	7.73643e-05	32.1527	0.00677962	0.141631	24	23.5247	27.9569	3.5276	0.12618	32.6678	28.1168	27.6566	26.9825	21.6563	27.662	28.3911	30.5222
Adarb1	0.0199098	0.453111	24	9.82711	6.62868	0.0440476	0.413932	24	10.5	5.87901	0.156413	1	24	9.02474	29.4511	0.00678288	0.141631	24	9.78422	20.6796	6.78131	0.327922	15.9609	17.6918	24.8076	30.5975	26.065	17.0433	18.4666	14.8044
Rrp9	0.00848521	0.374636	24	10.7302	1.42383	0.113095	0.577886	24	12	1.32617	0.143279	1	24	11.5126	8.19344	0.00679572	0.141631	24	11.4147	6.48415	1.45423	0.224275	5.55609	5.57201	6.45052	8.03979	8.1025	7.2567	5.28013	5.61544
Slc25a51	0.0262739	0.482512	24	11.6775	12.6355	0.0440476	0.413932	24	15	15.8115	0.118874	1	24	12.3143	71.4541	0.00679879	0.141631	24	12.9755	54.6598	15.6129	0.285638	41.6064	44.1652	43.9979	66.4005	68.6032	70.0705	54.9852	47.4492
Desi2	0.0676876	0.585718	24	20.916	8.41618	0.0138889	0.278415	24	19.5	10.348	0.146909	1	24	18.206	36.7068	0.00681999	0.141631	24	19.5398	27.9488	11.5547	0.413425	32.2562	29.9399	15.2393	17.4967	21.9542	35.9839	36.4633	34.2569
Coq9	0.0194471	0.453111	24	11.0472	8.4181	0.0440476	0.413932	24	12	8.25689	0.161249	1	24	11.9909	82.165	0.00682064	0.141631	24	11.6801	72.5558	8.83391	0.121753	65.2069	67.0952	75.1754	74.7006	83.9443	80.9555	66.7895	66.5793
Erc2	0.0668779	0.581746	24	0.101752	1.65103	0.0138889	0.278415	24	3	1.5469	0.148823	1	24	1.50892	11.2399	0.00682496	0.141631	24	1.5362	9.70982	2.29704	0.236568	11.0479	11.5035	10.2402	9.51471	7.68546	6.82396	10.035	10.8279
Ctage5	0.00630764	0.351388	24	11.1621	29.9645	0.113095	0.577886	24	12	27.3648	0.194311	1	24	10.1579	256.264	0.00683993	0.141725	24	11.1072	224.712	30.4577	0.135541	221.691	211.017	231.358	254.699	260.204	225.49	215.076	178.163
Ccz1	0.0216064	0.466996	24	9.88786	2.66912	0.0440476	0.413932	24	9	2.41921	0.147326	1	24	9.04999	31.2398	0.00690285	0.14281	24	9.31207	27.7186	2.80997	0.101375	27.1631	26.5762	29.6992	31.8121	29.6099	27.196	24.3826	25.3098
Erbb4	0.0284612	0.49079	24	9.15959	5.96657	0.0440476	0.413932	24	9	7.15156	0.112828	1	24	8.59888	16.5838	0.00695141	0.14326	24	8.91956	9.09358	6.65432	0.731761	4.66866	12.0427	13.8955	16.9472	14.239	4.42725	2.8474	3.68094
Olfr1033	0.0944014	0.636751	24	20.5416	1.39	0.0138889	0.278415	24	19.5	2.38605	0.107967	1	24	18.2625	7.03992	0.00695584	0.14326	24	19.4357	4.65904	2.00658	0.430686	4.52719	3.62052	2.36519	2.92093	3.51506	6.65753	7.29819	6.36775
Pck1	0.0203575	0.457487	24	10.9628	599.624	0.0440476	0.413932	24	13.5	585.226	0.15788	1	24	9.98514	2232.82	0.0069563	0.14326	24	11.4636	1545.12	619.582	0.400994	1102	752.812	1526.38	2329.05	2146.36	1730.39	1605.41	1168.52
N4bp2l2	0.0182939	0.453111	24	21.5366	6.11251	0.0440476	0.413932	24	22.5	6.19543	0.176522	1	24	20.9999	68.8238	0.00698264	0.143584	24	21.6779	64.7944	6.29504	0.097154	72.1649	67.8655	57.0602	59.2862	62.1093	63.3464	68.1165	68.4063
Pnpla6	0.0924857	0.635516	24	20.3597	3.74118	0.0138889	0.278415	24	19.5	5.38125	0.111232	1	24	18.1488	30.0674	0.00700765	0.143683	24	19.3385	25.2405	5.57373	0.220825	27.6776	22.2367	19.3784	21.2563	22.6691	29.9922	29.8839	28.8295
Prkar2a	0.0232532	0.478397	24	21.486	11.9077	0.0440476	0.413932	24	21	11.3067	0.139688	1	24	20.3585	86.0342	0.0070153	0.143683	24	20.9483	76.0578	13.1224	0.172532	85.2706	77.5973	66.8435	56.7123	73.4289	75.4631	88.2971	84.8496
Ppig	0.0290828	0.493667	24	23.728	2.53141	0.0440476	0.413932	24	3	3.44881	0.111767	1	24	7.73643e-05	24.3826	0.00701929	0.143683	24	0.88218	20.1619	3.10554	0.15403	24.668	22.5962	22.6306	19.3475	16.1752	16.7437	18.6602	20.4735
Ddx17	0.0230403	0.477399	24	23.7588	21.5268	0.0440476	0.413932	24	3	21.7731	0.14157	1	24	1.66932	133.18	0.00703881	0.143804	24	1.48209	117.359	28.5784	0.243512	127.083	143.973	117.641	101.394	97.23	94.8697	117.048	139.634
Ski	0.00793408	0.367326	24	22.7524	4.37718	0.113095	0.577886	24	0	4.15965	0.160437	1	24	7.73643e-05	25.2269	0.00705	0.143804	24	23.5858	23.2141	4.50378	0.19401	25.1053	24.2395	22.3887	19.2319	18.4094	20.5718	28.2805	27.4861
Senp7	0.0240342	0.482512	24	23.3521	1.97748	0.0440476	0.413932	24	3	2.08887	0.136156	1	24	1.4198	10.4986	0.00705704	0.143804	24	1.26384	8.46943	2.42669	0.286523	10.0576	11.1183	9.19198	6.53594	6.19603	6.42451	9.12274	9.10831
Aars	0.0521554	0.544663	24	21.7344	11.9273	0.0138889	0.278415	24	21	11.6527	0.199924	1	24	20.9999	229.23	0.00708361	0.143992	24	21.2444	214.319	12.6893	0.0592075	227.53	211.557	202.788	199.78	210.099	218.5	212.477	231.818
Gramd1c	0.374901	0.788912	24	2.48139	2.53388	0.0031746	0.18868	24	4.5	4.94166	0.121765	1	24	3.43057	36.0575	0.00708749	0.143992	24	3.47018	30.2543	6.18848	0.204549	33.5038	37.7715	34.2146	31.7253	28.3588	21.2708	26.8706	28.319
Zfp263	0.0171035	0.447025	24	10.4896	1.16583	0.0440476	0.413932	24	10.5	1.29334	0.192747	1	24	9.26029	16.4801	0.00709879	0.144005	24	10.0849	15.0236	1.16823	0.0777598	15.2921	14.4051	15.9381	16.4555	16.1454	14.9461	13.5182	13.4878
Gypa	0.0257933	0.482512	24	21.5788	0.152951	0.0440476	0.413932	24	21	0.195736	0.128095	1	24	20.9999	0.520456	0.00711144	0.144047	24	21.1928	0.268437	0.164196	0.164196	0.360117	0.128387	0.0806314	0.173521	0.119154	0.332876	0.442315	0.510495
Prodh	0.0531163	0.546568	24	11.2476	36.4005	0.0138889	0.278415	24	13.5	26.6398	0.198132	1	24	12.1266	212.844	0.00713617	0.144332	24	12.2889	164.984	40.4113	0.244941	123.121	153.654	147.556	176.586	236.224	179.786	163.712	139.231
Trim34b	0.0222118	0.47078	24	23.4621	0.261344	0.0440476	0.413932	24	0	0.255795	0.150763	1	24	1.74089	0.770577	0.00718821	0.145168	24	0.395107	0.571563	0.297417	0.297417	0.68165	0.924388	0.56442	0.318121	0.297886	0.399452	0.580538	0.806045
Arhgap39	0.0180603	0.452114	24	23.4466	0.547023	0.0440476	0.413932	24	0	0.511458	0.185939	1	24	2.29529	3.94788	0.00720428	0.145185	24	0.567207	3.66695	0.632878	0.17259	3.76837	4.2111	3.57466	3.29689	2.91928	3.39534	3.8979	4.27204
Pdpr	0.018944	0.453111	24	10.5329	4.26144	0.0440476	0.413932	24	13.5	3.89032	0.177456	1	24	9.9933	36.0633	0.00721048	0.145185	24	11.3134	30.9177	4.29763	0.139002	26.9445	27.1154	30.3174	36.6996	36.2527	30.5248	30.6579	28.8295
Fgfrl1	0.0198069	0.453111	24	9.87008	8.27208	0.0440476	0.413932	24	12	7.37891	0.170267	1	24	9.28756	29.0036	0.00722886	0.145269	24	10.3751	18.8403	8.20561	0.435536	11.6781	15.2011	23.2487	27.5319	30.0567	14.5467	14.5411	13.9177
Ip6k1	0.019033	0.453111	24	10.6274	6.3232	0.0440476	0.413932	24	13.5	6.23968	0.177413	1	24	10.481	50.364	0.0072361	0.145269	24	11.5135	44.244	6.44189	0.145599	35.5616	39.3379	42.8422	53.9649	46.9469	48.8995	45.5861	40.8127
Itih3	0.0193655	0.453111	24	22.6669	140.898	0.0440476	0.413932	24	0	122.439	0.174691	1	24	7.73643e-05	1079.9	0.00724683	0.145269	24	23.5577	961.927	144.088	0.14979	1067.21	1057.91	887.752	891.057	734.945	974.961	990.094	1091.49
Slc38a3	0.0289943	0.493594	24	8.95405	487.207	0.0440476	0.413932	24	9	560.957	0.117731	1	24	7.66114	1627.46	0.00729902	0.146027	24	8.54034	1044.53	574.333	0.549849	519.096	1289.98	1524.63	1630.23	1337.87	766.148	620.899	667.378
N4bp2l1	0.0257881	0.482512	24	11.4721	10.5801	0.0440476	0.413932	24	13.5	11.6892	0.132724	1	24	12.0077	48.2562	0.00731467	0.146027	24	12.3229	35.9174	11.9596	0.332974	28.1277	20.9271	31.6344	48.3833	46.9469	43.6734	37.9838	29.6624
Klhdc7a	0.0678812	0.586056	24	9.14071	11.8746	0.0138889	0.278415	24	9	10.6912	0.160096	1	24	8.58242	45.4563	0.00732149	0.146027	24	8.90779	28.1529	13.2668	0.471243	21.3241	28.7331	38.1655	51.7959	30.3546	19.1404	19.1854	16.5239
Cnnm4	0.0297422	0.496417	24	21.2867	1.19186	0.0440476	0.413932	24	21	1.42492	0.115337	1	24	19.6444	7.03516	0.00732776	0.146027	24	20.6464	5.61446	1.36884	0.243807	6.3535	4.72465	4.78413	4.07773	4.67681	6.09164	7.43642	6.77078
Adh5	0.0263151	0.482512	24	11.8392	39.6538	0.0440476	0.413932	24	13.5	36.3662	0.130831	1	24	13.0122	361.692	0.00734898	0.146131	24	12.7856	313.425	48.438	0.154544	286.769	272.9	309.571	322.662	367.413	360.505	308.984	278.596
Gne	0.0195899	0.453111	24	10.5122	37.9873	0.0440476	0.413932	24	10.5	29.7901	0.175911	1	24	9.45855	163.615	0.00735452	0.146131	24	10.1579	117.627	38.0218	0.323239	91.4698	85.2491	120.598	179.189	146.5	119.07	111.353	87.5902
Ttc14	0.0169673	0.446454	24	22.3363	6.10458	0.0440476	0.413932	24	1.5	4.30529	0.20361	1	24	7.73643e-05	50.6251	0.00736923	0.146147	24	23.9471	39.9656	6.11363	0.152972	50.7637	43.1124	37.8699	37.5961	33.8994	32.8216	42.8492	40.8127
Slc25a3	0.0657217	0.578024	24	12.0168	22.1604	0.0138889	0.278415	24	15	18.3982	0.166927	1	24	13.0036	202.483	0.0073769	0.146147	24	13.3314	172.298	29.6527	0.172101	155.686	152.473	163.091	178.003	198.928	210.178	163.546	156.48
Gle1	0.0228396	0.475068	24	11.3846	3.98523	0.0440476	0.413932	24	15	3.48706	0.152035	1	24	12.218	29.6187	0.00739932	0.146377	24	12.8425	24.9151	4.71392	0.189199	21.8771	21.5691	25.2376	26.5776	29.4312	30.092	22.558	21.9782
Acvr2b	0.0192925	0.453111	24	9.61904	1.16596	0.0440476	0.413932	24	12	0.827559	0.181249	1	24	9.29475	4.00366	0.00744065	0.14698	24	10.2907	2.66997	1.15023	0.430802	1.24755	2.59342	3.03712	4.04881	4.05125	2.13041	2.12864	2.12258
Ugp2	0.0177817	0.451707	24	11.3219	100.648	0.0440476	0.413932	24	12	104.175	0.198058	1	24	11.6223	454.235	0.00748315	0.147604	24	11.648	334.206	106.343	0.318195	320.594	249.636	343.275	414.541	469.052	388.1	258.837	229.615
Foxs1	0.0211347	0.463425	24	23.553	0.24489	0.0440476	0.413932	24	0	0.209787	0.167304	1	24	2.00467	0.478405	0.00750709	0.14768	24	0.510442	0.321231	0.283817	0.283817	0.411562	0.564904	0.349403	0.0867603	0.0297886	0.233013	0.276447	0.617968
Trmt1	0.020022	0.453111	24	10.5609	3.69853	0.0440476	0.413932	24	12	3.89603	0.176654	1	24	11.6735	24.9644	0.0075088	0.14768	24	11.413	20.3228	3.74334	0.184194	16.7712	18.8473	19.0559	25.0159	24.3373	22.4692	17.2779	18.8077
Fkrp	0.0194125	0.453111	24	10.1	1.10646	0.0440476	0.413932	24	12	1.00158	0.182744	1	24	11.5488	10.6961	0.00752666	0.147817	24	11.2196	9.42444	1.08399	0.115019	8.19266	9.21821	9.56826	10.498	10.6345	10.0196	8.18282	9.08144
Ttc25	0.0483609	0.534374	24	10.314	0.304007	0.0138889	0.278415	24	12	0.192374	0.233147	1	24	9.28132	0.753628	0.00753975	0.14786	24	10.527	0.38441	0.303544	0.303544	0.167197	0.231097	0.37628	0.983283	0.506407	0.399452	0.304091	0.107473
Rrm2	0.0661623	0.580127	24	11.7551	3.13819	0.0138889	0.278415	24	15	3.40984	0.172524	1	24	12.1752	10.3565	0.00761394	0.149066	24	12.9528	5.86805	3.89339	0.663489	3.72978	2.25962	3.7628	8.47359	9.53236	10.419	4.11906	4.64819
Kat5	0.0203268	0.457487	24	22.83	1.1434	0.0440476	0.413932	24	0	0.852506	0.177338	1	24	7.73643e-05	10.9815	0.00762325	0.149066	24	23.6114	10.134	1.18287	0.116723	10.9064	10.7332	10.4015	8.27115	9.38341	9.75328	10.3115	11.3115
Rfesd	0.0199066	0.453111	24	22.1952	1.45947	0.0440476	0.413932	24	0	1.19014	0.181524	1	24	21	8.74022	0.0076381	0.149141	24	22.393	7.78305	1.45826	0.187363	9.28588	8.21679	7.90188	5.40806	7.00033	7.09027	8.76336	8.59781
Fdx1	0.00912343	0.385145	24	10.9807	11.8297	0.113095	0.577886	24	12	12.2767	0.155426	1	24	11.2695	77.4359	0.0076841	0.149823	24	11.4163	65.3027	12.2008	0.186835	60.4097	55.0525	71.9501	72.8787	78.3441	73.0996	57.031	53.6557
Dazap1	0.0223995	0.47078	24	9.71107	4.76147	0.0440476	0.413932	24	12	3.80815	0.162928	1	24	8.8493	33.3617	0.00769864	0.149891	24	10.173	27.5905	4.74928	0.172135	23.3047	25.7031	31.3119	35.3404	28.5375	27.3291	25.8754	23.3216
Pbld2	0.00848743	0.374636	24	11.1488	43.2392	0.113095	0.577886	24	12	39.602	0.168972	1	24	11.5593	337.903	0.0077536	0.150745	24	11.5694	288.324	45.2229	0.156848	276.223	261.628	296.347	317.977	350.523	303.983	259.224	240.685
Frrs1	0.0274678	0.488561	24	9.10885	2.34268	0.0440476	0.413932	24	9	2.53928	0.13476	1	24	7.61944	27.1625	0.007786	0.151026	24	8.57859	24.6396	2.73323	0.110928	21.9414	25.7288	26.3934	27.5609	25.8863	24.3333	22.0052	23.2678
Mettl16	0.0178587	0.451707	24	22.5272	1.5781	0.0440476	0.413932	24	1.5	1.61327	0.207416	1	24	7.73643e-05	18.7995	0.00779037	0.151026	24	0.00884753	15.4712	1.61654	0.104487	18.4946	17.7431	14.9706	13.8816	14.8645	13.7478	14.4029	15.6641
Spopl	0.0262879	0.482512	24	23.2633	1.82571	0.0440476	0.413932	24	3	2.31196	0.141456	1	24	7.73643e-05	23.0411	0.0078145	0.151277	24	0.723538	20.2818	2.10838	0.103954	22.9446	22.6218	21.5286	18.6245	18.32	17.5759	20.5953	20.0436
Snx30	0.332959	0.788912	24	6.45444	1.20814	0.0031746	0.18868	24	6	1.79401	0.156138	1	24	5.8879	15.3151	0.00786175	0.151972	24	6.11401	12.5588	2.62145	0.208734	11.8581	13.9429	15.9919	13.737	11.6771	10.4856	11.2514	11.5264
Rnf144a	0.0177276	0.451707	24	23.8941	2.22789	0.0440476	0.413932	24	0	1.85418	0.211989	1	24	2.19277	5.3636	0.00788046	0.151972	24	0.685806	4.48463	2.69395	0.600707	5.02878	5.70039	4.54224	3.47041	1.90647	2.46328	4.89311	7.87237
Ppp1r15a	0.020898	0.463112	24	10.4975	1.5805	0.0440476	0.413932	24	10.5	1.5752	0.180509	1	24	9.09542	10.1761	0.0079042	0.151972	24	10.0333	8.36984	1.58415	0.189268	7.56246	6.93291	9.89079	10.122	9.32384	8.52163	8.21047	6.39462
Limd1	0.0228335	0.475068	24	10.9022	5.5289	0.0440476	0.413932	24	13.5	3.99358	0.165236	1	24	11.9974	51.921	0.00790525	0.151972	24	12.1305	44.5488	5.90355	0.132519	37.9795	41.8543	42.8422	47.3711	53.8578	48.2671	41.6052	42.6129
Phf14	0.0221226	0.47078	24	10.2045	1.73172	0.0440476	0.413932	24	10.5	1.67395	0.170625	1	24	8.99784	29.6288	0.00790817	0.151972	24	9.90268	27.4106	1.75399	0.0639894	26.8159	27.0384	28.6779	29.4696	29.3418	26.1641	26.8706	24.9068
Cast	0.0211322	0.463425	24	10.5939	4.03274	0.0440476	0.413932	24	12	3.0156	0.17889	1	24	10.0297	48.6851	0.00791766	0.151972	24	10.8714	44.5562	4.0469	0.0908269	39.6129	43.0611	43.756	49.5691	48.9725	44.3391	46.1113	41.0277
Crebzf	0.0106201	0.407555	24	23.1731	7.04418	0.113095	0.577886	24	0	7.50384	0.138885	1	24	7.73643e-05	39.2348	0.00792887	0.151972	24	23.7249	33.3794	7.45233	0.223261	38.8798	37.7202	32.602	29.5563	25.7076	25.465	38.0114	39.0932
Ice2	0.0158728	0.444405	24	22.0311	1.57513	0.0440476	0.413932	24	0	1.63897	0.240662	1	24	7.73643e-05	18.1078	0.00798364	0.152703	24	23.3503	15.504	1.53065	0.0987258	18.0573	16.7931	15.2931	14.2576	13.5836	14.4135	16.6144	15.0193
Trappc2l	0.0209983	0.463425	24	11.0478	1.76511	0.0440476	0.413932	24	12	1.69165	0.182088	1	24	11.9868	9.0296	0.00798957	0.152703	24	11.6789	6.97156	1.85222	0.265682	5.41462	6.90724	7.06869	7.51923	9.47278	8.45506	5.72245	5.21242
Rnf4	0.0259014	0.482512	24	9.7897	11.5146	0.0440476	0.413932	24	9	9.62995	0.150229	1	24	8.72175	92.8039	0.00810175	0.15451	24	9.16994	79.9655	12.2942	0.153744	72.9109	80.7299	86.7057	99.5719	81.5612	82.8196	67.2871	68.1376
Crip2	0.0199332	0.453111	24	22.1057	7.04003	0.0440476	0.413932	24	0	5.54199	0.195366	1	24	7.73643e-05	26.7088	0.00810691	0.15451	24	23.3745	16.1508	6.88586	0.426348	27.9862	13.8915	15.6963	9.89067	10.3367	12.4829	17.8308	21.0915
Ank	0.0260228	0.482512	24	11.5816	4.87229	0.0440476	0.413932	24	12	4.29253	0.15024	1	24	12.0767	26.433	0.00813244	0.154779	24	11.8862	20.1047	5.29036	0.26314	16.7969	16.6647	17.7658	22.9047	28.3886	22.7022	19.6554	15.9597
Il4ra	0.01002	0.405315	24	23.1651	6.17962	0.113095	0.577886	24	0	6.51493	0.15251	1	24	1.18037	35.8872	0.00815549	0.154831	24	0.113794	32.4027	6.72532	0.207554	34.8285	37.4121	32.817	25.2183	26.6608	28.0282	36.1039	38.1528
Syt1	0.0330101	0.504601	24	9.04793	5.31608	0.0440476	0.413932	24	9	5.93206	0.118908	1	24	8.64149	16.1496	0.00815804	0.154831	24	8.89652	8.83263	5.95524	0.674231	5.36317	8.98711	14.3255	16.8315	11.975	4.85999	3.45558	4.86314
Cttnbp2nl	0.00942054	0.390232	24	23.2806	0.744038	0.113095	0.577886	24	0	0.800196	0.16273	1	24	7.73643e-05	5.56998	0.00817608	0.154886	24	23.7605	5.1384	0.792277	0.154188	5.49179	5.59768	4.83789	4.80074	4.34914	4.42725	5.58422	6.01847
Ndufa11	0.0835278	0.624058	24	12.4215	3.72878	0.0138889	0.278415	24	15	3.92577	0.149924	1	24	14.4639	35.1015	0.00819681	0.154886	24	13.9713	29.6557	5.75412	0.194031	27.0474	25.1126	28.8392	29.2671	34.3761	35.9174	30.4091	26.2771
Brwd3	0.28918	0.788912	24	0.958258	2.13032	0.0031746	0.18868	24	3	2.27316	0.189681	1	24	1.81353	23.421	0.00820451	0.154886	24	1.9226	20.3651	3.4182	0.167846	23.0089	24.0084	22.0393	20.8514	18.7668	13.6479	20.0977	20.5004
Vps53	0.403322	0.788912	24	3.85492	1.25337	0.0031746	0.18868	24	4.5	1.95015	0.136045	1	24	4.67879	23.7797	0.00820664	0.154886	24	4.34486	21.2765	3.5441	0.166573	21.9286	23.5205	24.1357	21.8925	20.9414	17.243	19.3513	21.199
Krit1	0.0175725	0.451538	24	21.7667	3.84186	0.0440476	0.413932	24	0	3.66312	0.225807	1	24	20.9999	30.1161	0.00822873	0.15492	24	22.2428	28.4638	3.82331	0.134322	34.5712	30.5048	24.5388	27.0403	24.3373	27.3957	29.5522	29.7699
Psen2	0.0107418	0.407555	24	23.0312	43.6298	0.113095	0.577886	24	0	41.4133	0.143927	1	24	0.989119	157.311	0.00823131	0.15492	24	0.0066879	126.847	46.7	0.368161	150.915	164.49	135.676	69.9866	82.6634	105.855	144.195	160.994
Myo1e	0.0300165	0.496595	24	23.6144	8.545	0.0440476	0.413932	24	1.5	9.00422	0.132497	1	24	5.9571e-05	59.614	0.00824374	0.154939	24	0.367798	50.5777	9.78315	0.193428	60.744	54.051	56.7914	46.3589	38.5167	40.8772	50.6174	56.6649
Cish	0.0947017	0.637507	24	8.58903	4.34359	0.0138889	0.278415	24	9	4.59863	0.133667	1	24	6.45506	14.4919	0.00826733	0.155165	24	8.02511	7.46677	5.62998	0.754005	4.41143	8.80737	15.8038	13.1586	6.73223	4.89328	3.45558	2.47187
Map7	0.0245409	0.482512	24	22.9816	2.73493	0.0440476	0.413932	24	3	2.80606	0.163027	1	24	7.73643e-05	31.1617	0.00828283	0.155165	24	0.628533	26.1848	3.03701	0.115984	31.5231	27.4749	27.576	24.5532	23.533	22.0697	26.0413	26.7069
Sertad4	0.0552099	0.554576	24	10.7313	0.0847336	0.0138889	0.278415	24	13.5	0.061455	0.230075	1	24	12.137	0.331878	0.00829013	0.155165	24	12.1231	0.241579	0.0890081	0.0890081	0.128613	0.154065	0.295649	0.231361	0.387252	0.299589	0.221157	0.214945
Slc9a3r1	0.083074	0.624058	24	12.0522	20.2629	0.0138889	0.278415	24	15	20.6971	0.153511	1	24	12.35	170.789	0.00831621	0.155347	24	13.1152	140.45	26.3319	0.187483	126.98	110.413	127.559	146.625	177.093	163.808	136.592	134.529
Hnrnpr	0.266757	0.781845	24	1.10321	4.50721	0.0031746	0.18868	24	3	3.79269	0.209361	1	24	3.08686	43.196	0.00832276	0.155347	24	2.40298	37.6623	8.06579	0.214161	40.8733	45.3207	40.9339	37.4226	34.9718	24.7993	37.2927	39.6843
Lats1	0.408211	0.788912	24	2.16335	2.12673	0.0031746	0.18868	24	4.5	4.76702	0.137064	1	24	2.5136	51.7749	0.00833488	0.155352	24	3.05072	46.8242	4.71555	0.100707	51.098	52.4847	49.8034	49.598	44.3255	38.4805	44.1485	44.6549
Ethe1	0.0942417	0.636542	24	0.416761	10.6525	0.0138889	0.278415	24	3	14.0465	0.135986	1	24	3.10376	48.8358	0.00834875	0.155352	24	2.18957	35.6539	17.011	0.477115	42.6739	51.0211	47.4919	25.9413	24.6948	19.0405	33.3671	41.0008
Reps1	0.390987	0.788912	24	4.81608	1.57062	0.0031746	0.18868	24	4.5	2.78229	0.143591	1	24	5.36875	16.789	0.00835753	0.155352	24	4.89477	13.3246	4.40355	0.330483	12.9128	16.639	16.4219	15.2698	12.0048	9.05424	11.666	12.628
Rassf8	0.0234943	0.478754	24	23.0409	5.91935	0.0440476	0.413932	24	0	5.15791	0.172519	1	24	7.73643e-05	46.9981	0.00836891	0.155352	24	23.6811	41.1	6.21041	0.151105	47.4326	42.3678	40.1276	40.17	32.7675	35.3515	44.3697	46.2132
Mon1b	0.0110073	0.41129	24	22.2211	1.61182	0.113095	0.577886	24	22.5	1.7089	0.14556	1	24	20.9999	10.9603	0.00846812	0.156979	24	21.909	8.78698	1.63165	0.185689	10.2505	8.70466	7.09557	8.01087	7.5961	7.85588	10.035	10.7473
Ddhd2	0.0240737	0.482512	24	11.2483	9.51727	0.0440476	0.413932	24	13.5	8.02221	0.171536	1	24	11.6359	39.4971	0.00849378	0.157091	24	12.1211	27.4196	10.4188	0.379975	23.1118	18.9243	23.8669	37.9432	40.9593	30.4582	23.9956	20.0974
Nid2	0.0094455	0.390232	24	23.4567	4.63428	0.113095	0.577886	24	0	4.44222	0.170619	1	24	1.60438	12.1098	0.00850739	0.157091	24	0.349059	10.0393	5.24753	0.522698	11.0736	13.8145	9.67577	5.6105	5.89815	6.39123	12.0254	15.8253
Hdac10	0.0234415	0.478397	24	10.2517	1.09067	0.0440476	0.413932	24	12	1.00408	0.177273	1	24	11.6288	9.50965	0.00853628	0.157091	24	11.2964	8.40931	1.08023	0.128457	7.2152	9.06414	8.57381	9.19659	9.74088	8.65478	7.57464	7.2544
Cul4a	0.0217456	0.466996	24	11.1986	22.1108	0.0440476	0.413932	24	12	17.8953	0.191287	1	24	11.5783	144.043	0.00854298	0.157091	24	11.5923	116.765	23.1937	0.198636	110.029	100.065	115.652	134.189	152.339	121.566	104.303	95.9731
Parp3	0.387866	0.788912	24	3.42397	2.39829	0.0031746	0.18868	24	4.5	4.10465	0.149233	1	24	4.90035	30.165	0.00856263	0.157091	24	4.27616	26.0223	6.64628	0.255407	27.7933	29.1182	30.8281	27.7344	24.9033	18.7409	21.9499	27.11
Elp4	0.0925493	0.635516	24	0.181807	2.05518	0.0138889	0.278415	24	3	2.69285	0.143051	1	24	2.97282	13.9232	0.00856724	0.157091	24	2.07108	11.2871	3.12387	0.276765	12.707	14.7132	13.2504	9.28335	9.11532	8.15547	11.1961	11.8757
Six5	0.0841664	0.624363	24	20.9758	0.499299	0.0138889	0.278415	24	19.5	0.495308	0.157423	1	24	18.7594	3.52093	0.00857263	0.157091	24	19.7416	2.99197	0.661386	0.221054	3.16389	3.184	2.15017	2.25577	2.91928	3.2289	3.62145	3.41226
Hp1bp3	0.0238649	0.481958	24	10.2197	3.61938	0.0440476	0.413932	24	10.5	3.69956	0.175399	1	24	7.3807	89.0542	0.00858572	0.157091	24	9.38989	85.5625	3.7337	0.0436371	82.917	84.2734	90.1728	88.7847	86.387	87.5132	83.8739	80.5776
Asap2	0.0257756	0.482512	24	23.384	5.68222	0.0440476	0.413932	24	0	5.80034	0.162449	1	24	1.50986	12.1301	0.00858789	0.157091	24	0.294111	7.93958	6.37041	0.802361	10.2762	15.6889	7.1762	2.74741	2.38309	2.9626	9.86915	12.4131
Tlk1	0.0533245	0.546727	24	22.5674	2.49213	0.0138889	0.278415	24	1.5	2.92033	0.24959	1	24	7.73643e-05	52.2871	0.00860319	0.157091	24	0.0219151	47.6441	2.56467	0.0538298	52.4228	50.4305	49.5883	45.607	43.4318	45.371	48.5717	45.7296
Angptl2	0.0107671	0.407555	24	10.5884	4.20048	0.113095	0.577886	24	13.5	3.49388	0.152168	1	24	9.74786	21.6926	0.00861963	0.157091	24	11.25	16.9147	4.24264	0.250826	12.9771	13.6347	17.0401	22.0082	21.9542	16.4774	17.3885	13.8371
Aco2	0.0298009	0.496417	24	11.8547	34.5643	0.0440476	0.413932	24	13.5	37.7472	0.141232	1	24	12.1571	207.372	0.00862308	0.157091	24	12.5013	161.316	40.6943	0.252264	142.606	130.441	138.122	188.01	209.861	192.103	156.552	132.836
Ptgds	0.0457077	0.532927	24	22.2301	0.641521	0.0138889	0.278415	24	3	0.4486	0.292106	1	24	7.73643e-05	2.63263	0.00862486	0.157091	24	0.380706	0.968502	0.634735	0.634735	2.73946	1.18116	1.04821	0.578402	0.536195	0.199726	0.497604	0.967254
Paqr9	0.0263696	0.482512	24	21.8866	74.2947	0.0440476	0.413932	24	22.5	76.3703	0.162247	1	24	20.9999	306.366	0.00873597	0.158901	24	21.7961	231.29	75.9319	0.328298	291.039	216.358	188.301	160.073	172.059	193.9	343.596	284.991
Fkbp5	0.031963	0.502832	24	11.7625	20.3477	0.0440476	0.413932	24	15	24.1516	0.134648	1	24	12.1575	57.2594	0.00877702	0.159433	24	12.9492	29.6096	25.2485	0.852713	15.9223	9.52634	14.9168	47.776	55.0196	51.7956	25.0737	16.8463
Map3k6	0.0243847	0.482512	24	10.8008	0.415706	0.0440476	0.413932	24	13.5	0.45074	0.17808	1	24	11.8959	1.8322	0.00883951	0.160354	24	12.0619	1.26182	0.438318	0.34737	0.720234	0.770324	1.02133	1.70629	1.90647	1.46466	1.18872	1.31654
Med9	0.0340971	0.504733	24	8.86304	0.952595	0.0440476	0.413932	24	9	1.12153	0.128019	1	24	7.84476	5.58281	0.00887608	0.160802	24	8.57032	4.45314	1.12048	0.251615	3.39539	4.85304	5.45606	5.49482	5.12364	3.89465	3.53852	3.86901
Tubb6	0.0107372	0.407555	24	22.7904	1.29752	0.113095	0.577886	24	0	1.08978	0.158786	1	24	0.66987	4.62236	0.00889608	0.160949	24	23.8219	3.94854	1.35163	0.342311	4.55291	4.57059	4.1122	2.40037	2.32351	3.62835	4.97604	5.02435
Mcu	0.114711	0.670887	24	0.60156	4.55313	0.0138889	0.278415	24	3	6.47704	0.121492	1	24	3.10234	21.6123	0.00892328	0.1611	24	2.24746	14.9734	7.51075	0.501607	18.5074	23.2124	20.3998	11.1053	10.3069	7.2567	12.7165	16.2821
Fdft1	0.0833944	0.624058	24	0.089261	13.7965	0.0138889	0.278415	24	1.5	15.5226	0.167231	1	24	3.09151	98.4341	0.0089282	0.1611	24	1.55864	83.5106	19.2346	0.230326	88.9361	107.357	88.8021	75.655	64.9094	65.9761	86.279	90.1695
P2rx4	0.0903536	0.63432	24	8.55111	8.36032	0.0138889	0.278415	24	7.5	10.0335	0.155894	1	24	6.27919	57.7742	0.0089989	0.16216	24	7.44429	45.4844	12.0414	0.264737	35.9474	50.7386	58.5384	54.5144	44.951	44.905	35.0258	39.2544
1810055G02Rik	0.0244633	0.482512	24	10.6301	10.5992	0.0440476	0.413932	24	12	8.4493	0.184651	1	24	10.1634	29.7572	0.00912035	0.16413	24	10.9283	16.7213	10.6537	0.637133	9.02865	7.70324	15.5081	30.2504	31.4866	15.046	14.4029	10.3442
Gldc	0.012452	0.429357	24	23.1522	74.8241	0.113095	0.577886	24	1.5	67.8883	0.141721	1	24	1.28011	257.513	0.00914246	0.164229	24	0.653644	201.835	84.8833	0.420557	248.352	262.27	229.88	108.624	115.252	170.632	217.895	261.776
Fnbp1l	0.0188148	0.453111	24	22.0214	3.23539	0.0440476	0.413932	24	0	3.22469	0.241407	1	24	19.6559	20.0907	0.00916007	0.164229	24	21.9	19.8955	3.28606	0.165166	24.295	24.2138	17.8195	17.3231	15.8178	19.5731	20.3465	19.775
Golga2	0.451085	0.788912	24	4.83716	1.75601	0.0031746	0.18868	24	6	2.92453	0.13975	1	24	5.32157	36.2331	0.00916219	0.164229	24	5.38599	31.9521	4.52536	0.141629	33.2851	34.0483	37.8699	33.287	30.7716	26.5302	29.2757	30.5491
Apon	0.0308034	0.499907	24	23.3775	18.5823	0.0440476	0.413932	24	1.5	20.2858	0.148011	1	24	1.06045	198.832	0.00918757	0.164466	24	0.651221	180.066	21.554	0.1197	194.386	205.985	184.807	157.036	162.497	170.133	171.563	194.122
Snrpb2	0.0210682	0.463425	24	22.2392	1.37136	0.0440476	0.413932	24	0	1.10621	0.217734	1	24	7.73643e-05	11.8976	0.00923225	0.164562	24	23.4178	9.75386	1.35656	0.139079	12.1154	9.98853	10.2939	8.38683	7.8642	9.52026	9.78621	10.0756
Cyth1	0.0260283	0.482512	24	9.62268	8.66002	0.0440476	0.413932	24	9	6.17139	0.17629	1	24	8.91061	44.3799	0.00923429	0.164562	24	9.17752	33.749	9.29757	0.275491	24.7323	31.763	38.515	48.4412	36.7889	31.3902	31.7084	26.6532
Vtcn1	0.43648	0.788912	24	2.63461	0.0457832	0.0031746	0.18868	24	4.5	0.0837322	0.145951	1	24	3.80627	0.375206	0.00923874	0.164562	24	3.64856	0.251924	0.115819	0.115819	0.270088	0.436517	0.322526	0.260281	0.178732	0.166438	0.165868	0.214945
Tada2a	0.0754603	0.608668	24	23.2954	0.316654	0.0138889	0.278415	24	4.5	0.55933	0.193037	1	24	7.73643e-05	5.6492	0.00924152	0.164562	24	1.1587	4.56553	0.381801	0.0836269	5.65898	5.10981	4.78413	4.48262	4.34914	3.86137	3.92554	4.35264
Dab2	0.0355778	0.507372	24	0.0791762	2.33506	0.0440476	0.413932	24	3	2.48489	0.129827	1	24	0.892041	14.2594	0.00928274	0.164853	24	1.31304	12.3098	3.13364	0.254565	13.9931	14.7389	12.6054	11.6548	9.65151	9.62013	11.1684	15.0462
Col15a1	0.11851	0.678138	24	0.731697	1.61927	0.0138889	0.278415	24	3	2.19037	0.123984	1	24	2.65104	8.31628	0.0093051	0.164853	24	2.13505	6.29232	2.65731	0.422311	7.89685	8.21679	8.33192	5.1767	4.9747	3.29548	5.00368	7.44248
Fam110a	0.0237897	0.481155	24	22.0946	0.771761	0.0440476	0.413932	24	0	0.570051	0.194767	1	24	20.9999	2.29268	0.00930578	0.164853	24	22.3577	1.69183	0.770627	0.455498	2.61085	2.02852	1.31698	0.694082	1.13197	1.89739	1.40988	2.445
Cda	0.0689329	0.589624	24	21.8886	1.41674	0.0138889	0.278415	24	21	1.21179	0.21345	1	24	20.1788	5.4043	0.00931535	0.164853	24	21.0223	3.8073	1.52129	0.39957	4.4243	3.33807	3.25213	2.16901	2.44267	3.36205	6.60708	4.86314
Lrrc40	0.00605074	0.351388	24	10.7577	2.27936	0.249206	0.801565	24	12	2.34336	0.135694	1	24	11.2412	17.0029	0.00932446	0.164853	24	11.3326	14.5533	2.32427	0.159707	13.2086	12.6333	15.5619	16.3399	17.0689	15.9448	12.7995	12.8698
Sacs	0.451037	0.788912	24	17.7126	1.2551	0.0031746	0.18868	24	18	2.2646	0.143021	1	24	17.3614	11.0071	0.00933083	0.164853	24	17.6914	8.10124	3.05437	0.377025	7.90972	4.72465	4.97227	7.89519	7.92377	10.186	12.4125	8.78589
Spns2	0.082618	0.624056	24	23.7034	3.43744	0.0138889	0.278415	24	3	3.52531	0.179523	1	24	1.36672	22.8667	0.0093745	0.165409	24	1.35704	19.1929	4.463	0.232534	21.98	24.2909	20.5879	15.935	16.8008	13.1819	20.3741	20.3929
Lyst	0.0247905	0.482512	24	22.4403	11.4023	0.0440476	0.413932	24	21	8.00753	0.189559	1	24	20.9999	115.791	0.00941026	0.165648	24	21.4775	100.578	11.5683	0.115018	106.775	104.764	93.3981	83.6369	99.9408	93.0056	107.759	115.345
Slc22a4	0.0234	0.478397	24	10.5545	0.527032	0.0440476	0.413932	24	10.5	0.421835	0.200884	1	24	8.04634	3.25942	0.00941253	0.165648	24	9.71366	2.80378	0.52868	0.188559	2.52082	2.72181	3.49403	3.03661	3.18738	2.9626	2.62624	1.88077
2410131K14Rik	0.402794	0.788912	24	13.7665	0.601894	0.0031746	0.18868	24	16.5	1.02848	0.162788	1	24	12.7025	8.63032	0.00945225	0.166132	24	14.299	7.48722	1.09824	0.146682	7.08659	5.4693	6.02048	8.01087	8.51954	8.52163	8.15518	8.11418
Ptp4a1	0.0336379	0.504601	24	11.8033	18.6783	0.0440476	0.413932	24	13.5	19.3364	0.141317	1	24	12.1546	83.1299	0.00949629	0.166689	24	12.4833	57.4672	21.8881	0.38088	46.6995	38.5162	46.3362	70.0156	84.9273	75.9957	52.0549	45.1922
Hormad2	0.0942157	0.636542	24	8.83988	0.16047	0.0138889	0.278415	24	9	0.146533	0.161148	1	24	7.99292	0.445003	0.00954949	0.167406	24	8.61156	0.204064	0.18766	0.18766	0.115752	0.20542	0.403157	0.520562	0.178732	0.0998629	0.0552893	0.0537363
Rft1	0.0112421	0.416235	24	10.6786	2.78321	0.113095	0.577886	24	12	2.6621	0.166909	1	24	11.7017	19.1425	0.00959758	0.168032	24	11.4613	15.9466	2.83949	0.178062	14.2761	15.9971	16.3951	18.104	19.1839	17.709	12.6889	13.2191
Teddm2	0.0255876	0.482512	24	10.6146	0.613044	0.0440476	0.413932	24	12	0.489058	0.188617	1	24	9.77014	1.56034	0.00961086	0.168047	24	10.7923	0.8224	0.614718	0.614718	0.424424	0.359484	0.725683	1.85089	1.34049	0.865478	0.663472	0.349286
Ppara	0.0261158	0.482512	24	10.6986	27.3325	0.0440476	0.413932	24	13.5	30.9767	0.186159	1	24	10.2034	160.168	0.00966664	0.168805	24	11.4435	128.763	27.899	0.216669	95.341	102.171	119.496	164.295	163.837	127.924	140.435	116.608
Shmt2	0.0103645	0.407555	24	11.1775	10.2227	0.113095	0.577886	24	12	7.94455	0.185417	1	24	11.1654	129.232	0.00978045	0.170466	24	11.4471	118.242	10.613	0.0897566	115.803	112.236	121.001	125.022	133.393	119.469	114.117	104.893
Slc25a39	0.0891423	0.63432	24	12.0224	25.727	0.0138889	0.278415	24	15	24.6054	0.175717	1	24	12.423	268.362	0.00978802	0.170466	24	13.1304	230.504	33.4325	0.145041	213.794	198.076	216.173	239.603	267.383	271.494	216.845	220.668
S1pr5	0.0379984	0.515431	24	20.8434	1.54264	0.0440476	0.413932	24	21	1.73453	0.130173	1	24	18.4729	7.59035	0.00979947	0.170466	24	20.1182	6.25327	1.94656	0.311286	7.84541	5.77743	4.40785	4.7429	5.12364	6.9904	8.07224	7.06633
Rpap3	0.0332664	0.504601	24	23.3589	0.75395	0.0440476	0.413932	24	3	1.02655	0.149183	1	24	7.73643e-05	9.22631	0.00982521	0.170694	24	0.756001	7.47446	0.881945	0.117994	9.10582	8.83304	7.41809	7.34571	6.7918	6.22479	6.60708	7.46935
Irs1	0.0315145	0.50187	24	23.4158	11.3096	0.0440476	0.413932	24	1.5	9.7726	0.157956	1	24	0.945027	56.7137	0.00984881	0.170838	24	0.624282	46.9957	13.1275	0.279334	53.6832	63.5774	43.3797	41.4425	31.5461	40.1782	46.1113	56.047
Mpv17l	0.0268234	0.483999	24	10.2516	2.67614	0.0440476	0.413932	24	10.5	2.00695	0.185816	1	24	7.39541	24.9717	0.00985869	0.170838	24	9.40557	22.5584	2.7538	0.122074	20.7453	25.1126	23.3562	25.9124	24.1288	22.6356	20.8164	17.7599
Stk40	0.0241169	0.482512	24	21.768	2.91548	0.0440476	0.413932	24	0	3.13762	0.208349	1	24	18.807	20.0397	0.00992193	0.171576	24	21.5461	18.6841	3.03095	0.16222	21.5041	21.1582	16.6101	15.8482	15.1028	19.1404	20.8717	19.2376
Enpp2	0.00563378	0.346331	24	11.0425	21.2635	0.249206	0.801565	24	12	18.9066	0.158309	1	24	10.2628	110.08	0.00995502	0.171576	24	11.1013	89.3605	21.6063	0.241788	82.3639	75.7228	95.6558	115.073	101.996	102.925	79.6996	61.4475
Fads2	0.0123064	0.4276	24	10.9789	46.3123	0.113095	0.577886	24	15	53.7249	0.15986	1	24	12.6521	342.062	0.00996318	0.171576	24	12.8659	279.291	52.2207	0.186976	185.936	213.251	263.477	297.096	340.067	351.218	281.174	302.106
Llgl2	0.0127505	0.435218	24	23.4268	5.0212	0.113095	0.577886	24	0	5.18099	0.154294	1	24	0.932859	27.3885	0.00996327	0.171576	24	0.119118	24.4417	5.54949	0.227051	27.1117	27.1667	26.1515	19.0873	20.018	19.6064	26.6218	29.7699
Zkscan3	0.012045	0.4276	24	22.3076	10.5396	0.113095	0.577886	24	0	10.6906	0.163358	1	24	7.73643e-05	69.4561	0.00996457	0.171576	24	23.44	55.4859	10.4845	0.188957	68.7824	60.3934	46.4437	51.9694	45.1893	47.4349	61.2053	62.4685
Pnpla8	0.0196854	0.453111	24	11.0852	10.1781	0.0440476	0.413932	24	10.5	10.9024	0.257861	1	24	10.1765	139.046	0.010002	0.17189	24	10.587	127.386	10.095	0.0792475	130.748	120.325	132.128	138.701	137.951	129.922	116.522	112.793
Rsrc1	0.0289918	0.493594	24	9.95244	1.51585	0.0440476	0.413932	24	7.5	1.89662	0.175226	1	24	6.57636	16.6012	0.0100082	0.17189	24	7.9925	14.9574	1.74282	0.116519	15.3436	16.6133	16.7713	15.9639	16.622	14.6133	11.7213	12.0101
Stam2	0.428266	0.788912	24	6.4197	0.688638	0.0031746	0.18868	24	6	0.967155	0.165007	1	24	5.41637	18.1343	0.0100284	0.172019	24	5.94552	16.5422	1.55854	0.0942164	16.6811	17.435	18.6527	17.005	16.0859	16.0114	14.2646	16.2015
Zfp26	0.0110696	0.412098	24	22.0605	4.30548	0.113095	0.577886	24	0	3.99296	0.180291	1	24	20.9999	21.5015	0.0100767	0.172421	24	22.3457	19.6405	4.29804	0.218836	24.2693	24.4963	15.965	15.5879	15.8475	18.8075	20.8441	21.3064
D630039A03Rik	0.416706	0.788912	24	5.42854	0.779334	0.0031746	0.18868	24	6	1.42706	0.170762	1	24	5.29252	6.3048	0.0100834	0.172421	24	5.57349	4.40338	1.94839	0.442476	3.90984	5.93149	6.66553	4.7429	3.84273	2.6963	3.67674	3.76154
Fbp2	0.0747651	0.606021	24	11.8711	0.0766557	0.0138889	0.278415	24	12	0.0545355	0.217724	1	24	13.0166	0.224136	0.01009	0.172421	24	12.2948	0.121565	0.0879044	0.0879044	0.0643066	0.0770324	0.107509	0.11568	0.238309	0.233013	0.082934	0.0537363
Traf4	0.0264318	0.482512	24	10.7043	3.53771	0.0440476	0.413932	24	10.5	3.13859	0.195061	1	24	10.9433	28.2186	0.0101258	0.172758	24	10.7158	24.1842	3.54505	0.146585	22.3273	22.211	23.6519	29.9323	26.4225	26.1974	21.4246	21.3064
6430573F11Rik	0.00775463	0.367326	24	23.3347	1.74394	0.249206	0.801565	24	0	1.9617	0.117655	1	24	7.73643e-05	5.59972	0.0101352	0.172758	24	23.7785	4.0824	1.86291	0.456328	5.29887	5.95717	3.92406	2.45821	2.71076	2.49657	4.06377	5.74979
Hdac11	0.0384408	0.51547	24	9.44541	5.33296	0.0440476	0.413932	24	9	6.01034	0.134693	1	24	8.62342	46.4076	0.0101597	0.172779	24	9.0229	38.6893	5.84062	0.150962	37.8509	36.9242	46.6318	46.0697	41.3466	35.2183	33.3118	32.1612
Acad10	0.0258788	0.482512	24	10.3011	4.70979	0.0440476	0.413932	24	12	4.46943	0.200132	1	24	9.31976	34.3733	0.010162	0.172779	24	10.5353	29.4028	4.7012	0.159889	23.9221	26.191	32.5751	32.4484	35.7463	28.128	30.7409	25.471
Ppard	0.012259	0.4276	24	22.7391	4.31818	0.113095	0.577886	24	22.5	3.56226	0.164911	1	24	20.9999	11.2424	0.0101799	0.172866	24	22.0831	4.86486	4.28774	0.88137	8.78429	5.64904	1.532	2.02441	2.44267	2.06383	5.00368	11.419
Slc38a2	0.0294913	0.496417	24	9.80574	49.1289	0.0440476	0.413932	24	10.5	41.3604	0.176546	1	24	9.04749	184.041	0.0102044	0.173066	24	9.78454	116.998	50.2615	0.429592	83.7272	93.1835	141.965	197.38	156.36	88.5118	97.6133	77.246
Stap2	0.026745	0.483605	24	10.5053	3.05608	0.0440476	0.413932	24	9	2.32384	0.195656	1	24	10.0752	24.9861	0.010245	0.173537	24	9.86155	22.2603	3.06801	0.137824	20.5395	20.7987	24.5657	25.6232	23.0862	25.232	19.2683	18.9689
Rpl37	0.275128	0.7863	24	13.0876	9.05228	0.0031746	0.18868	24	15	5.48826	0.265953	1	24	14.6231	96.7959	0.0103079	0.174385	24	14.2409	80.1305	15.6617	0.195453	73.0138	71.6401	72.7027	76.6093	89.4254	105.289	78.2344	74.1292
Ldb2	0.0138473	0.438527	24	23.2127	0.667442	0.113095	0.577886	24	1.5	0.591048	0.14967	1	24	0.841258	3.61963	0.0103814	0.17541	24	0.522848	3.17697	0.753643	0.23722	3.56259	3.69755	3.1715	2.80525	2.17457	2.72959	3.59381	3.68094
Sorcs2	0.0260236	0.482512	24	11.0187	0.0866136	0.0440476	0.413932	24	12	0.060992	0.204842	1	24	11.8323	0.255117	0.0103959	0.175436	24	11.6176	0.151195	0.0904441	0.0904441	0.0900293	0.154065	0.134386	0.202441	0.297886	0.166438	0.110579	0.0537363
Hook2	0.0119851	0.4276	24	10.2063	4.98676	0.113095	0.577886	24	12	4.84441	0.174256	1	24	9.33916	22.5605	0.0104444	0.176035	24	10.5088	16.5344	4.97115	0.300655	11.7681	10.8616	19.029	22.9915	20.7627	16.8103	15.7851	14.267
Fbp1	0.105223	0.659033	24	12.2007	153.16	0.0138889	0.278415	24	15	158.325	0.162257	1	24	14.3733	1037.84	0.0104769	0.176363	24	13.8696	815.938	226.64	0.277766	691.618	576.151	809.808	799.265	1008.49	1097.06	812.974	732.13
Cyp4f13	0.0274367	0.488561	24	10.6974	4.51837	0.0440476	0.413932	24	10.5	3.3091	0.196647	1	24	9.59633	54.8602	0.0104951	0.17645	24	10.2653	49.3929	4.50053	0.091117	46.9824	46.5789	48.9164	56.5099	53.9174	48.5999	48.8758	44.7623
Gimap4	0.0287149	0.491929	24	22.2764	1.84514	0.0440476	0.413932	24	22.5	1.4147	0.190898	1	24	20.9999	12.9128	0.0106272	0.178059	24	21.9276	10.6728	1.86448	0.174694	12.9771	9.57769	10.4283	9.02307	8.81743	10.5522	11.0026	13.0042
Zfp94	0.14971	0.707537	24	20.2965	0.22881	0.0138889	0.278415	24	18	0.399219	0.116127	1	24	20.9999	2.43982	0.0106276	0.178059	24	19.7793	1.97076	0.313918	0.159288	1.98064	1.51497	1.58575	1.59061	2.0852	2.13041	2.46038	2.41813
Tkfc	0.0416808	0.524288	24	12.1039	105.198	0.0440476	0.413932	24	13.5	102.747	0.131562	1	24	12.6105	376.918	0.0106302	0.178059	24	12.7374	232.081	129.491	0.557957	157.577	144.924	155.001	277.517	382.992	363.934	226.603	148.097
Nedd1	0.0297685	0.496417	24	10.1751	2.48879	0.0440476	0.413932	24	10.5	2.37801	0.184716	1	24	7.83112	22.0657	0.0106533	0.178226	24	9.51539	19.6026	2.55995	0.130592	17.62	18.8216	23.0875	21.2852	20.8818	20.0059	19.213	15.9059
Drc1	0.126295	0.688146	24	1.04116	0.308941	0.0138889	0.278415	24	3	0.421704	0.140023	1	24	3.66335	1.15798	0.0107712	0.179955	24	2.57669	0.766099	0.567397	0.567397	0.87457	1.23252	1.10196	0.636242	0.387252	0.266301	0.635827	0.994122
Sorbs2	0.0359225	0.507372	24	23.4726	20.3342	0.0440476	0.413932	24	1.5	20.6422	0.155445	1	24	2.09842	102.921	0.0107832	0.179955	24	1.03305	84.1674	24.764	0.294223	96.0484	111.954	89.6622	66.9211	58.5048	63.6792	93.6325	92.937
Serpina6	0.0335133	0.504601	24	11.1788	36.1571	0.0440476	0.413932	24	13.5	31.7624	0.167806	1	24	14.2202	167.562	0.0108436	0.18074	24	12.9806	132.64	42.2584	0.318595	97.476	85.0951	158.656	141.072	171.285	166.205	138.638	102.69
Inca1	0.169566	0.725841	24	7.52636	2.57284	0.0138889	0.278415	24	6	4.08101	0.105428	1	24	6.2127	13.8827	0.0108636	0.180851	24	6.57736	9.35302	4.76114	0.509049	7.90972	12.6076	13.9761	12.4935	9.97919	5.29273	5.41835	7.14693
Ckap5	0.0365287	0.50926	24	23.8887	3.95545	0.0440476	0.413932	24	1.5	3.49977	0.154812	1	24	2.15802	28.1355	0.0108912	0.18092	24	1.18693	25.1771	5.12321	0.203486	27.4203	28.8871	26.0171	24.1772	19.5711	20.2722	26.5112	28.5609
Slc6a9	0.0396771	0.515635	24	11.8004	6.07176	0.0440476	0.413932	24	13.5	5.79396	0.142582	1	24	12.1086	27.8286	0.0108945	0.18092	24	12.4668	19.7957	7.09921	0.358623	16.604	11.8116	16.6907	24.2061	29.2822	24.1002	19.7383	15.9328
Champ1	0.0143511	0.441005	24	22.9172	1.30238	0.113095	0.577886	24	3	1.32619	0.154814	1	24	7.73643e-05	9.062	0.010966	0.181884	24	0.606985	7.92864	1.43294	0.180729	8.79715	9.26956	7.25683	6.96974	6.82159	6.65753	8.76336	8.89336
Gprin3	0.0979783	0.646362	24	8.88834	25.1894	0.0138889	0.278415	24	9	25.7675	0.184931	1	24	7.41612	111.713	0.0109793	0.181884	24	8.43784	76.6373	30.2044	0.394122	53.1044	87.9196	98.2628	126.67	72.7736	61.8484	61.0671	51.4525
Ccdc166	0.0949457	0.637882	24	20.7841	0.330047	0.0138889	0.278415	24	21	0.356657	0.191495	1	24	18.0222	2.53504	0.0110091	0.182154	24	19.9561	2.21414	0.428758	0.193646	2.5594	2.00284	1.93515	1.87981	1.93626	2.29685	2.79211	2.31066
Zbtb21	0.0148134	0.441005	24	21.5233	4.14467	0.113095	0.577886	24	22.5	4.05116	0.151707	1	24	20.9999	15.7644	0.0110652	0.182859	24	21.6734	12.4894	4.26947	0.341848	17.6972	12.9671	7.68686	9.10983	10.5452	11.0848	15.5363	15.288
Tmem150a	0.0139992	0.438527	24	22.4461	9.94275	0.113095	0.577886	24	22.5	9.88466	0.161027	1	24	20.9999	70.6967	0.0110921	0.18308	24	21.9847	60.9263	9.9878	0.163933	68.3322	65.0923	57.8665	47.8917	56.5388	52.6943	70.0239	68.9706
Neto2	0.144133	0.706222	24	20.3519	0.125525	0.0138889	0.278415	24	19.5	0.180529	0.127803	1	24	20.9999	0.588136	0.0111228	0.183264	24	20.2844	0.402516	0.155974	0.155974	0.48873	0.231097	0.161263	0.289201	0.417041	0.432739	0.635827	0.564231
BC004004	0.0465427	0.534374	24	0.0577185	11.2755	0.0440476	0.413932	24	3	14.495	0.124902	1	24	1.72311	68.2747	0.0111303	0.183264	24	1.59693	56.9644	15.7553	0.276582	67.3419	66.8641	67.1929	46.6481	46.4107	42.5749	51.8614	66.8211
Fbxw7	0.0427976	0.526183	24	23.7959	1.71876	0.0440476	0.413932	24	1.5	1.84433	0.13634	1	24	7.73643e-05	14.6215	0.011163	0.183283	24	0.428601	12.7249	1.9995	0.157132	14.8034	13.5834	13.6805	12.3778	10.426	10.186	12.7442	13.9983
Lbp	0.0315701	0.50187	24	22.9723	7.4101	0.0440476	0.413932	24	1.5	6.56423	0.185123	1	24	7.73643e-05	54.8081	0.0111771	0.183283	24	0.154504	45.5551	7.97127	0.174981	56.2426	44.1395	46.6587	42.3969	37.2358	38.4805	46.2219	53.0646
Klre1	0.0101257	0.407555	24	22.6487	0.133461	0.113095	0.577886	24	21	0.136028	0.224845	1	24	20.9999	0.480077	0.011179	0.183283	24	21.5457	0.214896	0.133232	0.133232	0.154336	0.154065	0.161263	0.0578402	0.0595772	0.233013	0.442315	0.456759
Supt20	0.0323099	0.504601	24	22.9039	2.04868	0.0440476	0.413932	24	0	2.08141	0.181058	1	24	0.180119	19.6402	0.0111855	0.183283	24	23.696	17.457	2.13663	0.122394	19.0605	20.7987	16.8788	15.5879	15.1922	15.9448	18.2178	17.9748
Adgrl4	0.043224	0.52663	24	21.3516	2.55125	0.0440476	0.413932	24	21	3.27312	0.135988	1	24	20.3611	27.4836	0.0112276	0.18375	24	20.9045	24.4789	2.83746	0.115914	26.0442	23.1611	22.2274	21.372	21.8053	27.2293	26.3177	27.6742
Churc1	0.0336025	0.504601	24	11.5342	1.0243	0.0440476	0.413932	24	12	0.738434	0.175886	1	24	12.2789	8.18256	0.011276	0.18421	24	11.9378	7.01893	1.11671	0.1591	6.04482	6.88156	6.36988	7.86627	8.25145	7.68944	7.29819	5.74979
S100a10	0.0164884	0.445928	24	23.1053	8.7634	0.113095	0.577886	24	3	11.3621	0.139872	1	24	7.73643e-05	49.4099	0.0112929	0.18421	24	0.670138	36.415	9.90271	0.271941	49.2846	45.5518	43.326	25.2762	28.0907	27.3957	34.8599	37.5348
Slc37a4	0.0382364	0.51547	24	11.9872	81.2708	0.0440476	0.413932	24	13.5	89.0354	0.155268	1	24	12.2506	258.455	0.011316	0.18421	24	12.5772	148.47	97.2308	0.654886	109.566	78.1878	95.4945	201.081	259.012	239.371	125.866	79.1805
Oplah	0.112263	0.666644	24	12.2494	16.7644	0.0138889	0.278415	24	15	15.5729	0.167782	1	24	12.3802	152.388	0.0113195	0.18421	24	13.1929	128.528	22.3628	0.173992	118.749	102.838	114.577	135.78	161.991	138.21	136.648	119.429
Fggy	0.0338349	0.504682	24	11.0862	10.6947	0.0440476	0.413932	24	12	7.7753	0.175618	1	24	12.0124	109.685	0.0113237	0.18421	24	11.7002	95.6142	11.256	0.117723	83.2128	92.1564	88.6946	103.592	113.971	99.3969	94.8489	89.0411
Itga5	0.0151325	0.441005	24	22.1464	6.85794	0.113095	0.577886	24	22.5	6.73845	0.153759	1	24	20.9999	25.2861	0.0113718	0.184584	24	21.8838	17.8989	6.9585	0.388767	21.8257	22.4678	11.1809	9.80391	12.9283	19.7063	19.3236	25.9546
Mtmr1	0.0351263	0.507372	24	9.80119	3.37867	0.0440476	0.413932	24	9	2.66383	0.170338	1	24	9.00897	42.1325	0.0113855	0.184584	24	9.26962	37.9057	3.57928	0.094426	36.6291	35.8714	41.1489	42.9174	39.2614	38.4139	33.6989	35.3048
Wdr36	0.0327423	0.504601	24	11.6525	5.13547	0.0440476	0.413932	24	13.5	4.23611	0.182781	1	24	12.058	33.5323	0.0113875	0.184584	24	12.4002	26.6448	5.91311	0.221924	24.0378	23.5976	24.3238	29.2382	35.3293	30.1586	24.5485	21.9244
Wapl	0.0269137	0.484649	24	22.4432	12.6956	0.0440476	0.413932	24	1.5	11.0184	0.223623	1	24	7.73643e-05	150.046	0.0114382	0.185184	24	23.9816	129.431	12.8779	0.0994963	149.924	142.433	131.725	122.014	108.162	120.867	135.68	124.641
Rsad1	0.0940728	0.636435	24	9.2588	1.22871	0.0138889	0.278415	24	9	0.959275	0.203544	1	24	8.78171	5.9944	0.0114667	0.185331	24	9.0135	4.27	1.35282	0.316821	3.51114	4.54491	4.7035	6.96974	4.58745	3.4952	3.12385	3.22418
Cav1	0.0480828	0.534374	24	21.2549	0.347126	0.0440476	0.413932	24	19.5	0.50003	0.125852	1	24	20.9999	3.63048	0.0114871	0.185331	24	20.5884	3.07781	0.402051	0.130629	3.26678	2.69613	2.68771	2.71849	2.77034	3.42863	3.40029	3.65407
Kif3c	0.0336624	0.504601	24	21.9001	0.217959	0.0440476	0.413932	24	19.5	0.305723	0.179993	1	24	20.9999	2.17094	0.0114985	0.185331	24	20.8034	1.60235	0.237565	0.148261	1.54336	1.2582	1.31698	1.41708	1.48943	1.59781	2.07335	2.12258
Stim1	0.032391	0.504601	24	9.45102	2.20252	0.0440476	0.413932	24	10.5	2.19534	0.187129	1	24	7.3891	27.2542	0.011502	0.185331	24	9.12301	24.9223	2.3876	0.0958017	22.07	24.5733	28.0597	26.3462	26.3033	24.6994	24.3273	22.9991
Ranbp17	0.0657747	0.578024	24	23.1806	0.0921013	0.0138889	0.278415	24	22.5	0.095018	0.295232	1	24	7.73643e-05	0.274136	0.0115939	0.186591	24	23.2266	0.213679	0.0942866	0.0942866	0.270088	0.231097	0.215017	0.0867603	0.20852	0.0998629	0.248802	0.349286
Nek9	0.0334249	0.504601	24	10.9737	5.14066	0.0440476	0.413932	24	12	3.806	0.184021	1	24	11.8584	62.1308	0.0116353	0.186931	24	11.6114	55.4974	5.35583	0.0965059	50.1849	53.3064	52.2492	60.6455	63.8966	56.2894	55.0682	52.3392
Mtnr1a	0.00679468	0.35623	24	22.2594	0.544328	0.249206	0.801565	24	0	0.552342	0.160133	1	24	7.73643e-05	1.70969	0.0116427	0.186931	24	23.4244	0.999377	0.53935	0.53935	1.67197	1.36091	0.913823	0.375961	0.595772	0.56589	1.38223	1.12846
Fmo2	0.175338	0.729876	24	13.4386	3.25667	0.0138889	0.278415	24	15	4.86866	0.112389	1	24	14.3991	16.6448	0.0117285	0.187849	24	14.2801	11.2881	5.82377	0.515922	9.35018	5.26388	6.47739	12.0308	16.354	16.0114	14.9834	9.83375
Ccdc162	0.0184754	0.453111	24	23.4495	2.10514	0.113095	0.577886	24	3	2.23041	0.131152	1	24	7.73643e-05	9.12688	0.01174	0.187849	24	0.786837	6.79965	2.49218	0.366516	8.82287	8.91008	6.10111	5.81294	5.09385	4.49383	6.05418	9.10831
Haus4	0.0148067	0.441005	24	10.5563	1.68061	0.113095	0.577886	24	12	1.63732	0.163673	1	24	10.046	10.8282	0.0117414	0.187849	24	10.8641	9.12202	1.68509	0.184727	7.65249	7.49782	10.3746	9.89067	11.4686	9.48697	8.62514	7.97984
4932438A13Rik	0.00869798	0.377505	24	23.1652	48.5644	0.249206	0.801565	24	3	53.3702	0.126992	1	24	7.73643e-05	177.171	0.0117813	0.188264	24	0.690348	131.887	55.3361	0.419572	169.152	180.153	119.093	94.0192	94.5491	77.8931	148.12	172.117
Rnf14	0.0322368	0.504601	24	10.7651	7.24823	0.0440476	0.413932	24	12	6.69404	0.194644	1	24	11.9346	60.6921	0.0118189	0.188411	24	11.568	51.0865	7.45809	0.145989	43.3169	48.7101	49.6958	55.2663	62.0795	56.8886	44.4526	48.2821
Stat5b	0.116909	0.673418	24	0.13883	10.89	0.0138889	0.278415	24	3	12.2344	0.170445	1	24	2.85633	72.5484	0.0118313	0.188411	24	2.01749	59.5197	16.3306	0.274373	66.6345	78.9582	64.1289	56.2207	44.534	40.8772	63.1957	61.6087
Tbrg4	0.0310286	0.499907	24	10.4161	3.78624	0.0440476	0.413932	24	12	2.73731	0.202588	1	24	11.4621	25.1742	0.0118356	0.188411	24	11.294	20.5929	3.7917	0.184126	16.7583	20.3879	19.4859	24.5821	26.5119	20.139	18.7154	18.1629
Ampd2	0.0200964	0.453876	24	23.4974	1.7791	0.113095	0.577886	24	3	2.69904	0.121962	1	24	7.73643e-05	28.4439	0.0118461	0.188411	24	0.803171	25.1434	2.1194	0.0842926	28.3721	27.706	26.5009	23.6277	23.0564	23.4678	22.9451	25.471
Phldb3	0.0328443	0.504601	24	22.1054	1.5762	0.0440476	0.413932	24	22.5	1.20339	0.193446	1	24	20.5595	7.43476	0.0119353	0.189075	24	21.7257	6.20266	1.61088	0.259708	7.18948	6.72749	6.12799	3.38365	5.27259	5.9252	7.74051	7.2544
Capn2	0.0446457	0.529901	24	23.6988	8.06199	0.0440476	0.413932	24	3	9.95927	0.142345	1	24	1.62234	53.59	0.0119376	0.189075	24	1.44629	45.3918	10.5747	0.232965	53.3745	51.7144	52.6523	38.9265	35.2399	34.5858	47.6871	48.9538
Sh3pxd2a	0.126263	0.688146	24	0.322469	11.7176	0.0138889	0.278415	24	3	15.1053	0.159652	1	24	3.2058	55.474	0.0119391	0.189075	24	2.19488	39.6464	18.4892	0.466352	47.8184	57.235	54.2112	29.672	24.5756	20.5718	41.5223	41.565
Npas2	0.0164765	0.445928	24	23.0868	3.00894	0.113095	0.577886	24	0	3.44513	0.150432	1	24	7.73643e-05	5.57551	0.0119506	0.189075	24	23.6963	2.26523	3.16615	1.39772	5.0545	5.05846	0.618174	0.0867603	0.20852	0.133151	1.07814	5.88413
Znrf2	0.0375869	0.51293	24	23.0886	7.72828	0.0440476	0.413932	24	1.5	7.84497	0.16944	1	24	7.73643e-05	91.1044	0.0119576	0.189075	24	0.1929	77.5863	8.41377	0.108444	91.2254	83.8626	78.6425	74.7585	70.7778	63.6127	78.9532	78.858
Ppp4r4	0.0340367	0.504733	24	21.9293	1.62603	0.0440476	0.413932	24	22.5	1.01646	0.188618	1	24	20.9999	8.31853	0.012033	0.190021	24	21.8105	6.91072	1.66004	0.240212	8.47561	6.52207	7.01494	4.16449	5.68963	7.32328	7.71286	8.38286
Ciart	0.0317434	0.502162	24	10.5412	8.77791	0.0440476	0.413932	24	12	4.46862	0.202707	1	24	10.4354	16.972	0.0120546	0.190021	24	10.9893	6.00727	8.8111	1.46674	0.475869	0.179742	3.62841	20.1284	15.5199	6.32465	0.995208	0.806045
Klf16	0.0341926	0.504733	24	11.3385	0.700768	0.0440476	0.413932	24	12	0.679558	0.188284	1	24	13.9942	3.52517	0.0120595	0.190021	24	12.4352	2.81369	0.793601	0.28205	2.18643	2.41368	3.06399	3.12337	3.24696	3.86137	2.5986	2.01511
Ubxn1	0.0421137	0.524288	24	23.3613	8.09043	0.0440476	0.413932	24	3	11.1813	0.153594	1	24	7.73643e-05	73.282	0.0121042	0.19048	24	0.756792	57.0314	9.46683	0.165993	74.66	64.6558	66.951	52.2297	43.1041	49.299	49.788	55.5633
Zfp800	0.0109205	0.409926	24	21.9752	1.61381	0.113095	0.577886	24	1.5	1.05914	0.231274	1	24	7.73643e-05	16.9326	0.0121281	0.19048	24	23.8316	13.7707	1.54411	0.11213	17.0027	14.328	13.2236	12.5513	12.7793	12.1833	14.0988	13.9983
Trak2	0.0730843	0.600492	24	10.2462	5.99458	0.0138889	0.278415	24	12	3.34809	0.281476	1	24	9.51884	35.2681	0.0121308	0.19048	24	10.5823	27.4117	5.9732	0.217907	23.2404	23.3408	25.9633	39.6495	31.4866	26.963	24.5761	24.0739
Tfeb	0.0451547	0.530695	24	11.4731	0.766013	0.0440476	0.413932	24	15	1.11301	0.14396	1	24	12.2044	7.92381	0.0121513	0.190564	24	12.8675	6.85148	0.916689	0.133794	5.80046	5.41794	6.15487	7.66383	8.01314	7.42314	7.32584	7.01259
Acsl4	0.145185	0.706234	24	20.6801	12.9277	0.0138889	0.278415	24	19.5	21.9095	0.142191	1	24	17.9937	135.299	0.0121643	0.190564	24	19.3936	112.591	18.5791	0.165014	108.743	107.717	92.1617	94.7712	98.928	134.748	135.874	127.785
Appl1	0.0527421	0.546568	24	0.232391	4.16089	0.0440476	0.413932	24	3	4.78414	0.124318	1	24	2.24278	20.2478	0.0122337	0.191431	24	1.83431	16.1683	6.1473	0.380206	18.7904	22.211	17.6852	13.7949	12.3623	10.0196	14.7623	19.7212
Kbtbd11	0.0358084	0.507372	24	23.2058	0.329858	0.0440476	0.413932	24	1.5	0.233817	0.18448	1	24	7.73643e-05	1.13723	0.0123055	0.192271	24	0.231721	0.821079	0.363365	0.363365	1.09321	1.12981	0.645052	0.780843	0.417041	0.432739	0.995208	1.07473
Tmem205	0.0442551	0.529901	24	11.6776	34.0179	0.0440476	0.413932	24	13.5	33.4988	0.149541	1	24	12.4251	245.712	0.012323	0.192271	24	12.5332	197.759	39.8414	0.201465	161.152	180.153	173.546	212.563	245.845	244.065	186.878	177.867
Gga2	0.204542	0.757872	24	19.3572	1.57348	0.0138889	0.278415	24	19.5	2.78836	0.102685	1	24	17.2215	18.5892	0.01233	0.192271	24	18.7022	15.5765	2.85568	0.183333	15.8452	13.2239	13.1698	12.7538	15.639	18.3415	18.5772	17.0613
Hgfac	0.0314661	0.50187	24	10.2593	25.7987	0.0440476	0.413932	24	12	15.1222	0.211202	1	24	10.4685	197.942	0.0123636	0.192573	24	10.9056	165.965	25.6174	0.154355	141.655	153.192	159.22	203.511	199.524	161.345	153.704	155.567
2510002D24Rik	0.0131406	0.436442	24	10.809	0.964063	0.113095	0.577886	24	10.5	0.994692	0.197375	1	24	9.98169	9.18834	0.0123834	0.19266	24	10.4304	8.22789	0.959538	0.11662	8.1155	7.67756	9.13823	8.73387	9.38341	8.48835	7.38113	6.90512
Mapre2	0.159158	0.716166	24	13.3227	2.18546	0.0138889	0.278415	24	15	2.8444	0.133206	1	24	14.695	16.3052	0.0124207	0.19302	24	14.342	12.6626	3.93247	0.310559	11.3566	9.6804	10.1058	13.1876	14.6858	17.1098	14.3199	10.8547
Gnl1	0.0164925	0.445928	24	10.7872	2.93583	0.113095	0.577886	24	12	3.08085	0.158946	1	24	11.1244	19.9704	0.0124872	0.193831	24	11.3031	16.4055	2.9939	0.182493	14.1089	13.1982	15.8306	20.3019	19.6307	17.709	15.1769	15.288
Smim7	0.0327529	0.504601	24	10.6668	7.24493	0.0440476	0.413932	24	12	7.30083	0.206786	1	24	11.924	43.4129	0.0125485	0.194559	24	11.5321	36.0829	7.40284	0.205162	28.3206	36.3079	39.9394	36.902	45.517	42.1421	30.4091	29.1251
Stk19	0.16715	0.723426	24	13.1221	0.924085	0.0138889	0.278415	24	15	1.2747	0.128909	1	24	14.3575	8.51055	0.0125794	0.194747	24	14.1619	6.85303	1.57702	0.23012	5.94193	5.85446	5.56357	6.70946	8.28124	8.75465	7.27055	6.44836
Gm10644	0.0166036	0.445928	24	22.2079	1.01735	0.113095	0.577886	24	22.5	1.05172	0.159533	1	24	20.9999	4.80434	0.0125893	0.194747	24	21.9045	3.51009	1.03029	0.293523	3.97415	3.51781	2.66084	2.89201	2.32351	3.19561	4.97604	4.54072
Chml	0.0168637	0.445928	24	22.1728	0.560797	0.113095	0.577886	24	21	0.659334	0.157399	1	24	20.9999	5.27207	0.0126099	0.194842	24	21.3895	4.49614	0.58004	0.129009	4.96447	4.15975	4.21971	4.07773	3.99167	4.22753	5.16955	5.15869
Dbn1	0.161749	0.717138	24	0.84314	0.291356	0.0138889	0.278415	24	4.5	0.37725	0.134202	1	24	3.12415	1.52523	0.0126524	0.195276	24	2.83458	1.08666	0.542554	0.499286	1.33758	1.56632	1.532	0.780843	0.834081	0.632465	0.774051	1.23594
Slc1a2	0.0387771	0.51547	24	11.2582	32.0334	0.0440476	0.413932	24	15	31.0849	0.177003	1	24	11.6943	209.871	0.0126801	0.19538	24	12.6124	168.044	36.6099	0.217859	147.597	133.471	150.001	206.345	215.312	177.057	164.375	150.193
Jph1	0.0169144	0.445928	24	11.0872	0.829473	0.113095	0.577886	24	12	0.697434	0.158169	1	24	11.1676	2.68716	0.0126879	0.19538	24	11.4177	1.8101	0.85796	0.473985	1.29899	1.00142	2.09642	2.22685	3.09802	1.99726	1.71397	1.04786
St3gal5	0.0539403	0.549593	24	12.1605	24.2999	0.0440476	0.413932	24	15	30.4791	0.127926	1	24	12.3746	84.4524	0.0127331	0.195853	24	13.1606	50.5522	32.0511	0.634021	35.5744	20.3109	28.3554	69.7553	82.9613	78.7585	52.9672	35.7346
Abcb8	0.0201747	0.454888	24	9.38403	4.81566	0.113095	0.577886	24	12	5.41671	0.133445	1	24	8.78933	28.8292	0.0127505	0.195899	24	10.0378	23.7395	4.79068	0.201802	18.4946	25.395	27.6297	27.8501	29.0439	21.6702	19.6277	20.2049
Ces1b	0.322313	0.788912	24	13.0708	9.90028	0.0031746	0.18868	24	15	6.32116	0.298092	1	24	14.7623	70.5376	0.0127681	0.195947	24	14.2826	51.3865	17.2499	0.335689	41.6064	43.2408	43.4335	47.3133	59.19	81.7544	49.8986	44.6549
Scamp1	0.037874	0.514629	24	9.61904	10.489	0.0440476	0.413932	24	10.5	9.07907	0.183633	1	24	8.90801	58.6296	0.0128118	0.196395	24	9.67527	44.1916	10.8105	0.244629	36.6162	38.2594	53.2974	61.542	48.8831	39.0131	40.8588	35.0629
Ergic1	0.0481022	0.534374	24	23.7062	4.25301	0.0440476	0.413932	24	3	4.53312	0.145227	1	24	7.73643e-05	61.0493	0.0128562	0.196853	24	0.874686	55.2763	5.20338	0.094134	60.9112	58.596	55.34	53.8203	52.279	48.9328	52.4419	59.8891
Dhx33	0.0333793	0.504601	24	10.5915	6.18274	0.0440476	0.413932	24	10.5	4.23855	0.209859	1	24	10.1248	37.2976	0.0128839	0.197054	24	10.4055	29.8017	6.17787	0.207299	26.9959	26.7046	28.436	40.6906	34.8527	30.4915	25.7925	24.45
Foxred1	0.0198051	0.453111	24	11.7127	7.14433	0.113095	0.577886	24	15	7.8772	0.138795	1	24	12.1825	37.5906	0.01296	0.197734	24	12.941	28.6455	8.81813	0.307836	24.3722	23.3151	25.3183	34.2703	36.4613	36.916	26.3177	22.1931
Mxd4	0.0180867	0.452114	24	10.9599	9.40244	0.113095	0.577886	24	15	8.96529	0.15201	1	24	11.6551	76.9219	0.0129619	0.197734	24	12.4957	65.7069	10.3248	0.157134	56.8985	56.6958	61.3874	79.27	73.9949	72.2674	63.6933	61.4475
Snx10	0.0200234	0.453111	24	11.3698	9.79335	0.113095	0.577886	24	15	11.3302	0.137447	1	24	12.0066	41.8228	0.0129722	0.197734	24	12.762	29.4573	11.4751	0.389551	22.0186	20.2852	24.5657	40.4592	39.0827	39.6456	25.9307	23.6708
Gorasp1	0.0158633	0.444405	24	10.8768	4.9876	0.113095	0.577886	24	12	3.99954	0.173816	1	24	10.931	27.107	0.0129911	0.1978	24	11.2681	21.2063	5.09361	0.240193	19.0862	18.3337	20.0504	28.5152	26.2736	22.4026	18.4113	16.5777
Osgin1	0.161067	0.717098	24	0.779858	30.0986	0.0138889	0.278415	24	3	39.2941	0.139656	1	24	3.49923	151.127	0.01301	0.197814	24	2.43837	101.537	52.3675	0.515746	117.09	166.467	136.187	86.0373	49.2108	67.4407	82.8511	107.016
Eif1	0.0175937	0.451538	24	10.0741	5.85673	0.113095	0.577886	24	12	4.80593	0.157185	1	24	11.1094	42.4278	0.0130212	0.197814	24	11.0617	36.7454	5.74224	0.156271	30.3785	39.8257	37.843	42.0787	43.7297	36.2502	33.1736	30.6834
Hectd2	0.0162226	0.445928	24	22.2951	1.52377	0.113095	0.577886	24	0	1.70867	0.171107	1	24	20.9999	5.79618	0.0130592	0.19787	24	22.428	4.60791	1.5232	0.330562	5.92907	6.11123	3.09087	3.55717	2.97886	4.52712	4.86546	5.80352
Barhl1	0.0166832	0.445928	24	22.921	0.0514593	0.113095	0.577886	24	1.5	0.0703152	0.166447	1	24	7.73643e-05	0.187485	0.0130632	0.19787	24	0.137629	0.0854479	0.0550591	0.0550591	0.19292	0.128387	0.134386	0.0289201	0.0297886	0.0332876	0.0552893	0.0806045
Pgap1	0.0420351	0.524288	24	9.59335	6.18026	0.0440476	0.413932	24	9	5.6164	0.169706	1	24	8.70368	43.9345	0.0130687	0.19787	24	9.09879	35.8979	6.68803	0.186307	32.5392	31.9428	45.5299	42.3969	39.3508	33.8868	31.8743	29.6624
Map2k2	0.050878	0.541919	24	11.9115	7.98686	0.0440476	0.413932	24	15	7.99591	0.140636	1	24	14.3469	73.9208	0.0130997	0.197964	24	13.7691	63.8439	11.2225	0.17578	57.4387	52.5617	65.1771	64.5786	73.2502	75.0303	65.3244	57.3904
Timp3	0.0584221	0.56281	24	11.9068	4.95698	0.0440476	0.413932	24	15	7.42752	0.122528	1	24	14.6988	41.4393	0.0131041	0.197964	24	13.8907	34.8119	7.0686	0.203052	27.2403	28.2195	31.2044	39.2735	37.8315	42.475	40.2506	32
Prkcb	0.0137241	0.438527	24	23.5628	0.895765	0.113095	0.577886	24	0	0.761512	0.204386	1	24	7.73643e-05	3.70251	0.0131666	0.198501	24	23.8544	3.29604	0.969127	0.294028	3.71692	3.44078	3.30589	2.74741	2.50224	2.33013	3.67674	4.64819
Phlda3	0.053023	0.546568	24	11.7014	0.174188	0.0440476	0.413932	24	15	0.234119	0.13586	1	24	14.7053	1.01421	0.013169	0.198501	24	13.8297	0.726417	0.238845	0.238845	0.372978	0.410839	0.645052	0.723003	0.953236	1.09849	0.801695	0.806045
Zfp277	0.18776	0.741572	24	8.03813	0.823893	0.0138889	0.278415	24	6	1.37503	0.122481	1	24	7.52353	11.901	0.013237	0.199304	24	7.19118	10.3974	1.29115	0.12418	10.7006	10.7845	11.9066	12.0886	10.2473	9.28725	8.65278	9.51133
Sowahb	0.0347733	0.507226	24	22.5082	2.90836	0.0440476	0.413932	24	22.5	2.83296	0.209954	1	24	20.9999	9.67588	0.0133075	0.199922	24	22.0056	6.46136	2.9148	0.451112	8.30842	8.62762	4.46161	3.09445	3.87252	7.42314	5.63951	10.2636
Atg13	0.030065	0.496595	24	10.7382	3.49891	0.0440476	0.413932	24	9	3.64861	0.243163	1	24	11.4463	26.6227	0.0133216	0.199922	24	10.4007	22.9019	3.48679	0.152249	21.6456	25.472	22.1468	27.5898	26.065	23.4678	19.7936	17.0344
Iars2	0.03831	0.51547	24	10.0311	6.40542	0.0440476	0.413932	24	9	6.68749	0.190842	1	24	9.28406	74.8473	0.0133222	0.199922	24	9.43792	66.8668	6.65438	0.099517	63.9208	64.6045	71.5738	72.2135	77.0036	62.847	61.5923	61.1788
Gcgr	0.0421334	0.524288	24	11.3255	16.1781	0.0440476	0.413932	24	13.5	13.8035	0.174397	1	24	12.2409	203.313	0.0133746	0.200485	24	12.3539	181.133	18.1664	0.100293	161.937	176.738	172.121	188.241	204.499	200.625	172.973	171.929
Trim68	0.186079	0.740329	24	1.04173	0.268938	0.0138889	0.278415	24	4.5	0.374194	0.125866	1	24	3.63849	1.68677	0.0134273	0.201053	24	3.0804	1.22868	0.531725	0.432759	1.51764	1.61768	1.69326	1.21464	0.744715	0.69904	1.13343	1.20907
Slc11a2	0.0441654	0.529901	24	21.1051	6.57821	0.0440476	0.413932	24	21	6.02681	0.167952	1	24	18.5578	39.605	0.0134736	0.201317	24	20.2345	34.5554	8.042	0.232727	40.6547	35.1781	28.1404	25.1316	32.7973	34.1198	43.2363	37.1855
Pdgfra	0.015066	0.441005	24	22.7174	1.41511	0.113095	0.577886	24	22.5	1.57884	0.191773	1	24	7.73643e-05	9.84512	0.0134746	0.201317	24	23.0703	9.40452	1.42965	0.152017	9.7103	9.88582	8.54693	8.50251	7.65567	8.72136	11.2514	10.9622
Vdac2	0.0150038	0.441005	24	11.1148	11.4622	0.113095	0.577886	24	12	11.9097	0.193116	1	24	11.4871	79.5097	0.0135046	0.201542	24	11.5339	65.9482	11.9488	0.181184	64.2166	57.5689	67.7573	76.5226	79.7441	72.3007	55.0405	54.4349
Hnrnpk	0.153806	0.712121	24	8.83547	14.3761	0.0138889	0.278415	24	7.5	18.3429	0.154656	1	24	6.14076	227.737	0.0135908	0.202607	24	7.49225	204.092	20.0386	0.0981843	206.309	213.328	231.305	223.87	201.163	204.419	167.167	185.175
Phip	0.0449103	0.530695	24	23.2991	6.05852	0.0440476	0.413932	24	1.5	5.4279	0.167681	1	24	7.73643e-05	56.5236	0.0136335	0.202842	24	0.262697	49.6815	6.73518	0.135567	55.8696	57.0553	49.6152	48.2387	40.6913	41.9091	53.0501	51.0226
Rab43	0.0924799	0.635516	24	11.1409	1.23508	0.0138889	0.278415	24	13.5	1.09858	0.258328	1	24	11.7146	8.6719	0.0136368	0.202842	24	12.1121	7.14165	1.3418	0.187883	6.00624	6.08556	6.66553	7.98195	9.6813	6.82396	7.57464	6.31402
Vwce	0.0359814	0.507372	24	9.61006	3.05965	0.0440476	0.413932	24	12	2.61126	0.209645	1	24	9.0069	21.2464	0.0136515	0.202842	24	10.1904	17.5458	3.03736	0.17311	13.9031	16.9985	19.5397	20.9382	20.9414	15.3123	17.4991	15.2342
Stard3	0.0197082	0.453111	24	11.0208	1.62617	0.113095	0.577886	24	15	1.4681	0.149473	1	24	12.0458	15.2204	0.0136803	0.202929	24	12.6583	13.1798	1.81799	0.137937	11.3694	11.1954	13.0892	14.2865	15.073	15.1459	12.3019	12.9773
Tmem106c	0.0263091	0.482512	24	9.40153	0.914018	0.0440476	0.413932	24	10.5	0.800936	0.287684	1	24	9.37767	9.96622	0.0136874	0.202929	24	9.75857	8.96096	0.932593	0.104073	7.62677	8.34517	9.407	10.2377	9.44299	9.25396	8.26576	9.10831
Xylb	0.0183848	0.453111	24	9.86703	9.37501	0.113095	0.577886	24	12	7.92197	0.161235	1	24	9.20329	81.0409	0.013747	0.203591	24	10.3458	71.0129	9.31134	0.131122	61.1556	70.2535	77.6212	77.6794	83.9443	66.775	67.4806	63.1939
Tnfsf13	0.0513976	0.541919	24	20.8257	0.122224	0.0440476	0.413932	24	21	0.148575	0.148299	1	24	17.8737	0.514396	0.0137628	0.203603	24	19.9247	0.397519	0.159185	0.159185	0.514453	0.359484	0.295649	0.231361	0.297886	0.499314	0.525249	0.456759
Acot12	0.0163277	0.445928	24	11.0422	22.5266	0.113095	0.577886	24	12	19.9389	0.182598	1	24	10.3103	128.994	0.013809	0.204063	24	11.1169	103.021	22.9075	0.222358	97.0773	84.3504	106.245	125.629	134.347	102.659	95.457	78.4013
Pfkfb1	0.238748	0.777332	24	14.236	6.89583	0.0138889	0.278415	24	16.5	10.7484	0.102222	1	24	15.0254	44.4218	0.0138658	0.204679	24	15.2504	30.3789	15.9638	0.525488	25.2468	18.231	18.0346	28.7755	39.1422	45.4709	39.9189	28.2116
Nras	0.0219874	0.470696	24	9.31467	1.79815	0.113095	0.577886	24	9	1.81211	0.137901	1	24	8.6673	24.4042	0.0139918	0.206314	24	8.994	22.3749	1.98202	0.0885822	20.771	21.9542	24.6195	24.0326	23.6522	22.2361	20.3465	21.3871
Rhoj	0.0186492	0.453111	24	22.9212	0.607423	0.113095	0.577886	24	1.5	0.505337	0.163568	1	24	7.73643e-05	3.64472	0.0140577	0.207061	24	0.137703	3.12969	0.649931	0.207666	3.61403	3.54349	3.03712	2.83417	2.26393	2.62972	3.6491	3.46599
Igfbp4	0.0569022	0.558602	24	12.1346	177.518	0.0440476	0.413932	24	15	186.111	0.139214	1	24	12.8318	1125.59	0.0141827	0.208553	24	13.3105	896.584	239.266	0.266865	790.136	665.431	800.616	1018.68	1064.44	1177.85	884.159	771.358
Mbd1	0.0189727	0.453111	24	9.95595	9.28762	0.113095	0.577886	24	9	8.03549	0.163069	1	24	9.10862	39.5414	0.0142135	0.208553	24	9.35426	27.7055	9.72478	0.351005	22.0958	20.0798	34.6984	41.5582	32.976	27.5289	21.5352	21.1721
Smarcc2	0.0503003	0.541803	24	23.6905	6.89765	0.0440476	0.413932	24	3	6.85321	0.157954	1	24	0.450292	52.8598	0.0142155	0.208553	24	1.02789	46.332	8.58849	0.185368	52.0884	53.8456	48.2714	41.9341	40.3934	34.6191	49.1799	50.3241
Akt3	0.012121	0.4276	24	23.3524	0.510063	0.113095	0.577886	24	22.5	0.460506	0.25541	1	24	2.70879	5.49786	0.0142206	0.208553	24	0.142779	5.42222	0.562811	0.103797	5.37603	5.54633	5.48294	4.80074	4.94491	5.15958	5.86067	6.20654
Mob3c	0.0461536	0.532927	24	11.3213	1.39972	0.0440476	0.413932	24	15	1.26566	0.17424	1	24	11.9529	13.3037	0.0143502	0.21	24	12.7263	11.3523	1.62656	0.14328	10.2505	9.80879	10.5358	12.5224	13.8815	11.8504	11.1408	10.8279
Bcl7c	0.0463961	0.534374	24	21.4234	2.22828	0.0440476	0.413932	24	22.5	1.77419	0.17333	1	24	21	11.8698	0.0143502	0.21	24	21.6397	9.88297	2.29928	0.232651	12.1797	8.93575	8.92321	6.30458	8.45997	11.4177	10.6985	12.1444
Lad1	0.0397257	0.515635	24	20.8876	1.73715	0.0440476	0.413932	24	21	1.61519	0.203851	1	24	18.0035	5.07817	0.0144284	0.210428	24	19.9862	3.99033	2.23198	0.559348	6.4178	3.62052	2.52645	2.14009	2.82992	4.22753	5.88831	4.27204
Ptpn21	0.0146188	0.441005	24	21.9773	1.86545	0.113095	0.577886	24	0	1.64458	0.216068	1	24	7.73643e-05	17.5844	0.014445	0.210428	24	23.333	14.8302	1.80411	0.121651	17.71	15.4835	14.8362	13.1876	12.4219	14.0807	16.1445	14.7775
Elf3	0.00527542	0.340416	24	22.7346	0.29856	0.488095	1	24	0	0.302989	0.138962	1	24	7.73643e-05	0.767119	0.0144634	0.210428	24	23.58	0.500558	0.306807	0.306807	0.745957	0.590581	0.295649	0.318121	0.297886	0.233013	0.663472	0.859781
Crcp	0.055469	0.554593	24	11.9648	3.22297	0.0440476	0.413932	24	15	3.4093	0.146468	1	24	12.3656	20.3758	0.0144649	0.210428	24	13.0908	16.2652	4.14523	0.254853	14.5976	11.3494	14.9437	18.7691	19.6307	20.6716	15.7851	14.3745
Hs3st6	0.0136129	0.438527	24	23.5346	0.344614	0.113095	0.577886	24	0	0.276211	0.232509	1	24	2.01621	0.879801	0.014468	0.210428	24	0.507964	0.781073	0.398789	0.398789	0.810264	0.950066	0.806314	0.375961	0.506407	0.599177	0.856985	1.34341
Ajuba	0.0181166	0.452114	24	22.533	1.75651	0.113095	0.577886	24	1.5	1.54072	0.174867	1	24	7.73643e-05	8.39605	0.0144783	0.210428	24	0.0107332	6.11222	1.8005	0.294573	8.06405	7.83162	4.46161	5.43698	4.49808	4.66027	6.71765	7.22753
Cxadr	0.0176338	0.451707	24	22.2145	49.4763	0.113095	0.577886	24	0	38.6363	0.179957	1	24	19.681	180.813	0.0144972	0.210428	24	21.9796	156.652	49.9824	0.319067	199.994	190.142	157.151	88.2063	96.6939	161.378	184.279	175.368
Ccnd2	0.030964	0.499907	24	21.8631	1.65262	0.0440476	0.413932	24	1.5	1.01771	0.263469	1	24	7.73643e-05	14.5155	0.0145115	0.210428	24	23.7962	11.5272	1.55772	0.135134	14.4819	12.2225	9.86391	11.2499	9.77067	10.652	11.8596	12.1175
Dnase1l2	0.0199536	0.453111	24	11.0621	0.0749167	0.113095	0.577886	24	12	0.075247	0.15955	1	24	11.5536	1.04742	0.0145337	0.210428	24	11.5386	0.954379	0.0779928	0.0779928	0.913154	0.873033	0.9407	1.04112	1.0426	0.998629	0.912274	0.913517
Gmeb1	0.0509456	0.541919	24	23.5414	1.5581	0.0440476	0.413932	24	3	1.66233	0.160463	1	24	0.640887	7.00842	0.0145348	0.210428	24	1.04585	5.3957	1.91476	0.354868	6.63644	7.75459	5.45606	4.25125	4.11083	2.99589	5.88831	6.0722
Rnf6	0.229819	0.772198	24	1.87333	2.89622	0.0138889	0.278415	24	3	4.44329	0.112995	1	24	3.94997	38.9791	0.0145533	0.210468	24	2.94184	33.9984	6.15823	0.181133	36.2818	38.85	38.8912	34.386	30.444	26.9297	31.6255	34.5793
Rbks	0.0153082	0.441005	24	10.939	1.38	0.113095	0.577886	24	10.5	1.26489	0.208608	1	24	11.7063	8.12145	0.0145686	0.210468	24	11.048	6.92237	1.39802	0.201958	6.12199	7.24104	7.36434	8.18439	7.56631	8.25533	5.9436	4.70193
Pias1	0.133497	0.69923	24	0.0293817	1.66751	0.0138889	0.278415	24	3	1.71766	0.195636	1	24	3.05438	15.622	0.014618	0.210722	24	2.05193	13.5566	2.47206	0.182351	14.5076	16.639	14.4062	12.7827	11.0814	10.9849	14.3752	13.6759
Tlr3	0.0234235	0.478397	24	23.85	1.04136	0.113095	0.577886	24	1.5	1.10876	0.137074	1	24	2.48516	5.1074	0.0146302	0.210722	24	1.2829	4.29877	1.36141	0.316697	4.91303	5.05846	4.97227	3.49933	2.91928	3.39534	4.31257	5.3199
Nbeal2	0.0234389	0.478397	24	21.6819	3.20816	0.113095	0.577886	24	21	2.77558	0.137015	1	24	20.9999	16.8804	0.0146328	0.210722	24	21.227	12.9614	3.4237	0.264147	14.6876	13.5063	8.7082	9.34119	12.1835	11.9835	16.8909	16.3896
Ndrg1	0.0604843	0.566318	24	0.346848	3.80424	0.0440476	0.413932	24	3	4.71193	0.13751	1	24	2.68197	14.3133	0.0147315	0.211297	24	2.02273	10.7442	5.86752	0.546109	12.707	15.92	12.6054	8.09763	7.38758	5.69218	8.87394	14.67
St3gal1	0.00890703	0.378806	24	22.8469	11.6775	0.249206	0.801565	24	21	9.06061	0.165158	1	24	20.9999	54.3519	0.0147392	0.211297	24	21.6102	37.7349	11.4683	0.303917	43.5613	43.8057	29.2692	27.7344	31.9334	27.3957	45.0608	53.1183
Atat1	0.0106084	0.407555	24	22.0016	2.07794	0.249206	0.801565	24	21	2.24633	0.138689	1	24	20.9999	9.81314	0.0147407	0.211297	24	21.333	7.70475	2.17411	0.282177	9.62027	8.01137	5.69796	6.44918	5.92793	6.65753	9.89679	9.37699
Pvr	0.231047	0.773026	24	7.21562	0.675366	0.0138889	0.278415	24	6	1.29957	0.114604	1	24	5.95026	6.5303	0.0147755	0.211297	24	6.387	5.1045	1.33001	0.260556	4.68152	6.23962	6.42364	6.10214	4.76618	4.09438	4.22963	4.29891
Wdr45b	0.0185643	0.453111	24	10.5117	8.10669	0.113095	0.577886	24	10.5	7.93379	0.175196	1	24	9.52916	37.8948	0.0147777	0.211297	24	10.1811	27.7277	8.11304	0.292597	25.1182	20.4136	31.2312	37.654	37.2358	26.7633	22.4751	20.9303
Endod1	0.0725012	0.599548	24	20.8586	0.632843	0.0440476	0.413932	24	19.5	1.05757	0.115202	1	24	20.4743	4.51842	0.0147798	0.211297	24	20.2787	3.50652	0.778289	0.221955	3.79409	2.59342	2.74147	2.80525	3.00865	4.22753	4.36786	4.51385
Tnfrsf22	0.0472708	0.534374	24	23.3748	0.183389	0.0440476	0.413932	24	1.5	0.183225	0.176722	1	24	2.10575	0.560879	0.0147819	0.211297	24	1.00431	0.387868	0.220171	0.220171	0.540176	0.539227	0.510666	0.260281	0.0595772	0.266301	0.469959	0.456759
Rasa1	0.0412729	0.52369	24	22.7787	2.77348	0.0440476	0.413932	24	1.5	2.73227	0.204586	1	24	7.73643e-05	39.026	0.0149058	0.212843	24	0.0908999	34.1414	2.92249	0.0855996	39.6257	34.5362	35.3703	33.1424	30.3844	30.8576	34.5005	34.7137
Ttc23	0.0419867	0.524288	24	11.1082	18.3943	0.0440476	0.413932	24	12	12.0262	0.202198	1	24	11.6325	70.7286	0.0149685	0.213514	24	11.5803	46.8439	19.2279	0.410467	34.4555	34.4335	35.2628	69.871	74.6503	48.5999	43.6509	33.827
Nicn1	0.0233441	0.478397	24	23.3264	2.08079	0.113095	0.577886	24	3	2.38866	0.142098	1	24	1.40275	12.8145	0.0150061	0.213825	24	1.24957	10.8543	2.5407	0.234074	12.5141	12.9414	12.1485	8.12655	8.72807	9.25396	11.0579	12.0638
Gng12	0.108101	0.660459	24	9.95172	3.67084	0.0138889	0.278415	24	9	4.72621	0.252076	1	24	8.97172	45.9758	0.015109	0.214783	24	9.30705	39.9212	3.85539	0.096575	41.2077	37.3864	43.1109	46.706	43.0446	36.45	36.1592	35.3048
Traf3	0.019215	0.453111	24	22.6303	3.42741	0.113095	0.577886	24	0	3.41215	0.174424	1	24	7.73643e-05	16.0057	0.015127	0.214783	24	23.5457	12.4302	3.49561	0.281219	15.9866	13.0698	11.4228	9.39903	10.6643	8.3552	15.1216	15.4223
Tuba4a	0.0167751	0.445928	24	22.1804	31.5246	0.113095	0.577886	24	1.5	27.9592	0.199953	1	24	20.9999	138.994	0.0151364	0.214783	24	22.8491	126.785	31.2118	0.24618	167.442	152.575	122.829	79.1543	103.456	127.924	117.877	143.019
Ube2cbp	0.0781133	0.61521	24	20.6836	0.230757	0.0440476	0.413932	24	21	0.292904	0.110426	1	24	18.7719	1.97584	0.0151549	0.214783	24	20.1591	1.64591	0.291251	0.176955	1.68483	1.54065	1.2901	1.24356	1.60859	1.93068	1.90748	1.96138
Zfp276	0.0897776	0.63432	24	9.95411	6.09643	0.0138889	0.278415	24	10.5	2.49005	0.304955	1	24	9.38421	31.2886	0.0151644	0.214783	24	9.94613	23.0895	6.18033	0.267668	18.2502	20.619	21.5017	35.832	27.7034	20.9712	19.8489	19.9899
Mfap3l	0.0645968	0.57668	24	20.6855	0.311699	0.0440476	0.413932	24	21	0.375587	0.133851	1	24	19.0606	1.08819	0.015183	0.214783	24	20.2532	0.790475	0.387238	0.387238	1.1318	0.539227	0.456911	0.375961	0.744715	0.865478	1.18872	1.02099
Ccm2	0.0479239	0.534374	24	11.0977	0.961572	0.0440476	0.413932	24	15	1.0768	0.180438	1	24	12.2342	14.382	0.0151843	0.214783	24	12.7524	13.0707	1.09244	0.0835796	11.6395	12.017	12.5785	13.8816	13.9709	14.6798	12.606	13.1923
Ahctf1	0.0264829	0.482512	24	21.014	29.2484	0.113095	0.577886	24	21	29.7317	0.127461	1	24	20.4513	141.298	0.0152111	0.214938	24	20.8219	118.007	33.1062	0.280544	151.468	110.773	80.4971	88.5244	106.465	122.365	145.328	138.64
Ppm1j	0.18288	0.734735	24	8.26799	0.0732556	0.0138889	0.278415	24	7.5	0.0966785	0.15059	1	24	6.12278	0.417038	0.0152341	0.215038	24	7.29962	0.277432	0.110668	0.110668	0.231504	0.333807	0.456911	0.347041	0.268098	0.199726	0.221157	0.161209
Zcchc8	0.248145	0.777332	24	2.07529	0.656727	0.0138889	0.278415	24	4.5	1.04626	0.111183	1	24	4.17998	17.3224	0.0152554	0.215071	24	3.59476	16.0519	1.57047	0.0978371	16.4625	17.3836	17.1207	16.3109	14.8347	14.9794	15.1216	16.2015
Fpgs	0.0100013	0.405315	24	22.715	24.7362	0.249206	0.801565	24	0	24.4167	0.154001	1	24	20.9999	115.28	0.0152752	0.215071	24	22.5755	88.2106	24.726	0.280306	101.759	106.176	77.1912	58.274	76.1099	68.5392	105.326	112.309
Slc10a1	0.0403442	0.520454	24	10.3802	95.5482	0.0440476	0.413932	24	10.5	73.4283	0.21615	1	24	9.35119	473.976	0.015284	0.215071	24	10.0782	343.871	96.0081	0.279198	324.221	284.275	359.562	503.528	443.94	305.148	278.161	252.131
Sec14l1	0.206732	0.759746	24	19.7201	1.41893	0.0138889	0.278415	24	18	2.10612	0.134476	1	24	17.5977	14.2263	0.0153459	0.215532	24	18.4337	12.0205	2.66467	0.221677	12.797	10.348	9.46076	10.5848	10.992	14.7797	13.7947	13.4072
Impact	0.0187656	0.453111	24	22.5807	2.64312	0.113095	0.577886	24	21	2.4345	0.182123	1	24	7.73643e-05	16.4738	0.0153583	0.215532	24	22.5283	14.8517	2.64297	0.177957	16.8483	14.0712	14.7018	13.1008	10.9026	14.3137	17.2226	17.6524
Rcl1	0.028235	0.49079	24	8.9987	17.4591	0.113095	0.577886	24	9	18.0762	0.121203	1	24	7.28641	102.293	0.0153741	0.215532	24	8.4327	80.905	20.87	0.257957	63.8565	82.5787	105.896	98.3862	88.919	75.4631	64.1909	67.9496
Cgn	0.0103359	0.407555	24	22.6186	15.8683	0.249206	0.801565	24	0	17.1165	0.150336	1	24	7.73643e-05	49.3831	0.0153804	0.215532	24	23.5418	35.1164	16.1701	0.460473	48.5515	41.6745	32.4676	17.9305	24.516	19.9393	49.2352	46.6163
Ift80	0.01605	0.445683	24	22.2423	0.661004	0.113095	0.577886	24	1.5	0.479581	0.217296	1	24	7.73643e-05	6.28469	0.015602	0.218242	24	23.9169	5.12499	0.654414	0.127691	6.16058	5.93149	4.64975	4.7429	4.58745	4.46054	5.33542	5.13182
Dcp2	0.164172	0.718339	24	0.852216	2.09699	0.0138889	0.278415	24	3	2.07527	0.17304	1	24	3.04174	25.6158	0.0156059	0.218242	24	2.30685	23.3438	3.59501	0.154003	24.5137	26.8843	24.1088	23.3385	21.4776	18.7409	22.8069	24.8799
Tex264	0.0198058	0.453111	24	10.44	5.15859	0.113095	0.577886	24	12	4.73804	0.177647	1	24	11.2616	45.6877	0.015709	0.219065	24	11.2341	39.2659	5.17018	0.131671	35.4201	35.9228	39.4557	44.5659	46.6788	40.1782	34.6664	37.2393
Puf60	0.047877	0.534374	24	9.67334	3.68072	0.0440476	0.413932	24	9	3.90485	0.188952	1	24	6.84823	46.7517	0.0157261	0.219065	24	8.5185	43.6131	4.18237	0.0958971	39.7544	45.2694	46.3631	46.5035	46.1426	45.8038	38.0944	40.9739
Mpzl1	0.0467941	0.534374	24	23.6609	1.27037	0.0440476	0.413932	24	1.5	1.17145	0.193399	1	24	2.28007	2.88448	0.0157308	0.219065	24	1.15399	1.95041	1.60145	0.821085	2.26359	3.90297	1.77389	0.867603	0.685138	0.865478	2.10099	3.14357
Ugt2b35	0.018826	0.453111	24	10.5888	65.8544	0.113095	0.577886	24	10.5	67.7065	0.187227	1	24	11.0085	349.505	0.0157308	0.219065	24	10.699	271.319	65.9433	0.243047	258.886	239.288	294.789	340.1	349.689	290.534	184.501	212.769
Hexdc	0.024841	0.482512	24	9.3409	1.18001	0.113095	0.577886	24	12	1.27905	0.14228	1	24	8.16345	6.95335	0.0157642	0.219065	24	9.81293	5.74962	1.1959	0.207997	4.29568	6.31665	6.77304	6.70946	6.91096	5.25945	4.97604	4.75566
Dnajb14	0.0208493	0.463112	24	21.4813	4.58758	0.113095	0.577886	24	22.5	4.346	0.169633	1	24	19.6406	26.8645	0.0157724	0.219065	24	21.2139	24.1782	4.92602	0.203738	28.7708	26.268	20.1847	17.9883	22.4308	23.1349	28.6399	26.0084
Angptl6	0.126939	0.68944	24	11.9491	1.17197	0.0138889	0.278415	24	13.5	1.06912	0.227089	1	24	14.6385	11.9662	0.015784	0.219065	24	13.3655	10.3041	1.56555	0.151934	9.05437	9.21821	10.3746	10.4402	10.992	12.8823	10.2285	9.24265
Rnf144b	0.0189568	0.453111	24	21.6723	8.15568	0.113095	0.577886	24	22.5	7.41893	0.1869	1	24	20.9999	43.5112	0.0157941	0.219065	24	21.7237	38.0564	8.37686	0.220117	48.5772	41.7002	28.2748	32.5062	33.4228	34.0865	43.5127	42.3711
Rab5b	0.0419804	0.524288	24	10.3833	3.90526	0.0440476	0.413932	24	10.5	4.29739	0.219345	1	24	10.324	74.3756	0.0159438	0.220902	24	10.4024	70.1278	3.90687	0.0557107	68.9882	67.1979	73.2402	73.9776	73.3098	72.5337	64.5779	67.1973
4430402I18Rik	0.0251172	0.482512	24	23.2811	0.595657	0.113095	0.577886	24	3	0.640127	0.142962	1	24	7.73643e-05	1.87894	0.0159592	0.220902	24	0.72956	1.16106	0.689537	0.593885	1.77486	1.87445	1.20947	0.462722	0.893659	0.466027	0.995208	1.61209
Stra6l	0.0597207	0.565532	24	0.0159571	44.3579	0.0440476	0.413932	24	3	45.4354	0.157885	1	24	2.56785	187.403	0.0162396	0.224554	24	1.87902	146.624	64.1615	0.437591	165.95	215.46	157.151	115.276	104.201	84.9167	150.857	179.184
Car15	0.223174	0.770189	24	7.59476	0.0695922	0.0138889	0.278415	24	6	0.103795	0.135066	1	24	6.94347	0.385287	0.0163404	0.225664	24	6.84679	0.253918	0.120651	0.120651	0.244365	0.282452	0.403157	0.375961	0.238309	0.133151	0.165868	0.188077
March8	0.0683529	0.586977	24	12.3322	16.9444	0.0440476	0.413932	24	13.5	20.3797	0.139192	1	24	12.647	129.832	0.0163532	0.225664	24	12.8257	106.161	21.3437	0.20105	98.1191	82.63	95.3332	112.094	132.649	126.726	106.598	95.1401
Jdp2	0.0794675	0.617865	24	12.2392	0.142356	0.0440476	0.413932	24	15	0.183635	0.120158	1	24	12.4955	1.26006	0.016399	0.225912	24	13.2292	1.0549	0.190904	0.180969	0.938877	0.796001	0.913823	1.1568	1.28091	1.19835	1.13343	1.02099
Zmym5	0.0428412	0.526183	24	10.4205	3.48777	0.0440476	0.413932	24	10.5	2.11821	0.222981	1	24	9.05904	33.4892	0.0164045	0.225912	24	9.9955	29.6347	3.50574	0.118299	27.5104	28.502	30.8281	35.9477	29.9078	30.558	28.944	24.8799
Hnrnpl	0.0705812	0.59186	24	8.65091	9.27726	0.0440476	0.413932	24	7.5	10.9714	0.135754	1	24	8.03964	72.4952	0.016443	0.225962	24	8.06343	60.0564	11.9158	0.19841	51.6768	66.0938	67.811	75.1055	64.3732	51.496	50.5345	53.3602
Socs6	0.0213924	0.466147	24	22.7127	1.79164	0.113095	0.577886	24	1.5	1.562	0.174753	1	24	7.73643e-05	17.8605	0.0164654	0.225962	24	0.06929	15.6025	1.87424	0.120124	17.9673	16.5106	16.0994	14.3444	13.2261	13.8477	16.9185	15.9059
Msmo1	0.207348	0.760063	24	0.767796	17.84	0.0138889	0.278415	24	3	22.0748	0.146881	1	24	2.7907	152.433	0.0164715	0.225962	24	2.19435	123.228	29.7031	0.241041	139.545	171.474	127.559	128.405	96.5747	89.9432	108.92	123.405
Spsb3	0.0207063	0.462258	24	22.5931	3.65619	0.113095	0.577886	24	22.5	3.20265	0.180677	1	24	20.9999	16.1409	0.0164749	0.225962	24	22.0342	12.8497	3.65227	0.28423	14.2375	16.4592	11.6109	7.37463	9.9494	12.616	14.3752	16.1746
Car11	0.274151	0.78512	24	18.9815	0.214661	0.0138889	0.278415	24	18	0.444177	0.111317	1	24	17.173	1.12266	0.0164975	0.226044	24	18.051	0.700662	0.461781	0.461781	0.745957	0.256775	0.349403	0.289201	0.86387	0.998629	1.16108	0.940385
Nudcd3	0.0477331	0.534374	24	9.8642	2.34517	0.0440476	0.413932	24	10.5	2.05485	0.202388	1	24	9.0831	24.6216	0.0165478	0.226505	24	9.81604	21.8629	2.39437	0.109518	19.8965	21.9542	23.3831	23.8012	25.4395	19.9393	21.0099	19.4794
Rap1gap	0.0264917	0.482512	24	9.39629	1.65263	0.113095	0.577886	24	10.5	1.78619	0.143473	1	24	8.94048	5.36585	0.0166781	0.228058	24	9.61077	3.24811	1.70919	0.526211	1.90348	3.15833	4.56911	5.1767	5.09385	1.99726	1.99042	2.09572
Daglb	0.0482017	0.534374	24	9.81322	3.2858	0.0440476	0.413932	24	10.5	2.71846	0.202913	1	24	9.50411	37.1114	0.016707	0.228222	24	9.93876	33.1096	3.33045	0.100589	30.9315	32.8415	33.3008	39.1578	35.1804	33.0213	29.3033	31.1402
Irf6	0.0258162	0.482512	24	23.2552	12.6323	0.113095	0.577886	24	3	11.2058	0.147921	1	24	1.07521	61.7333	0.016739	0.228413	24	1.10866	49.551	15.0798	0.30433	60.744	62.2165	53.8887	41.8763	29.4609	38.5804	56.1463	53.4945
Ttc30b	0.0275449	0.488561	24	21.6272	0.677236	0.113095	0.577886	24	21	0.708263	0.138805	1	24	19.5925	5.78815	0.0167547	0.228413	24	20.743	5.07713	0.756078	0.148918	5.23456	5.36659	4.3541	4.13557	4.58745	5.32602	5.9436	5.66918
Tle3	0.194135	0.749047	24	1.61843	3.00319	0.0138889	0.278415	24	3	3.82825	0.161275	1	24	4.21494	18.5234	0.0168279	0.229181	24	2.94556	14.4516	6.25331	0.432709	15.2535	18.7959	18.0346	14.7493	10.5452	8.38848	13.2142	16.6314
Bid	0.0484253	0.534374	24	10.8869	1.02207	0.0440476	0.413932	24	13.5	1.12957	0.204896	1	24	9.77529	12.9059	0.0168937	0.22971	24	11.3666	11.7846	1.04852	0.0889736	10.5591	10.5791	11.4228	13.4189	12.541	12.0834	12.4954	11.1772
Zmynd8	0.0272549	0.487452	24	23.6594	8.54681	0.113095	0.577886	24	3	8.58262	0.141924	1	24	1.77335	32.1942	0.0169063	0.22971	24	1.4874	25.328	11.2065	0.442454	30.8543	33.432	28.4091	19.8392	15.0433	14.5467	29.3863	31.1133
Fh1	0.173755	0.728166	24	12.4714	29.83	0.0138889	0.278415	24	15	27.49	0.18177	1	24	14.5669	209.049	0.0169419	0.22971	24	14.0227	158.806	46.6878	0.293993	124.459	124.818	140.111	157.528	186.358	234.578	157.049	145.545
Cwf19l2	0.15628	0.714988	24	0.690064	2.04001	0.0138889	0.278415	24	3	1.57564	0.202444	1	24	3.38387	19.6191	0.0169645	0.22971	24	2.371	17.5773	3.47165	0.197507	18.9447	19.4635	19.3784	17.4967	15.0433	13.2152	18.1349	18.9421
Atp5a1	0.170746	0.726278	24	12.8672	76.9177	0.0138889	0.278415	24	15	81.8566	0.185302	1	24	14.3793	1008.18	0.0169653	0.22971	24	14.086	883.19	126.659	0.143411	838.919	776.717	835.261	873.908	973.254	1055.38	876.64	835.438
Aasdh	0.0599309	0.566209	24	23.4609	1.47852	0.0440476	0.413932	24	1.5	1.3872	0.166561	1	24	7.73643e-05	11.9819	0.0169727	0.22971	24	0.316554	9.93902	1.66912	0.167936	11.9482	11.3238	10.2939	9.45687	8.48976	7.12355	10.505	10.3711
Stat2	0.0228577	0.475068	24	22.1714	9.98693	0.113095	0.577886	24	0	9.09381	0.170251	1	24	20.9999	59.2393	0.0169854	0.22971	24	22.3846	45.6005	9.9773	0.218798	52.9372	47.9655	32.7095	40.1989	36.1336	47.2019	47.7147	59.9429
C1ql4	0.0886996	0.63432	24	20.4387	0.101394	0.0440476	0.413932	24	19.5	0.14035	0.113558	1	24	18.257	0.363992	0.0170915	0.23032	24	19.4	0.237331	0.148472	0.148472	0.295811	0.179742	0.0806314	0.0867603	0.20852	0.366164	0.331736	0.349286
Dap3	0.0532603	0.546727	24	11.4573	3.38496	0.0440476	0.413932	24	13.5	3.11322	0.189198	1	24	13.9447	28.2026	0.0170971	0.23032	24	12.9766	24.1078	4.09093	0.169693	19.6264	23.7003	23.3831	25.0737	27.2566	29.3597	23.7744	20.6885
Car1	0.0434857	0.527079	24	10.5062	1.2394	0.0440476	0.413932	24	9	1.08087	0.231856	1	24	9.53566	6.2046	0.0171045	0.23032	24	9.67967	4.54587	1.24734	0.274391	4.43716	3.98001	4.67662	6.39134	6.19603	3.89465	3.59381	3.19731
Rps6kb2	0.0236194	0.480458	24	10.1046	0.96193	0.113095	0.577886	24	9	0.961676	0.166276	1	24	11.3427	11.1275	0.0171062	0.23032	24	10.1484	10.1594	0.967181	0.0952004	9.4788	10.5278	10.8046	10.6426	11.4388	10.3192	8.90158	9.16204
Gm16286	0.0252993	0.482512	24	11.8054	10.0509	0.113095	0.577886	24	13.5	10.7616	0.15545	1	24	12.1341	57.5211	0.0171245	0.23032	24	12.4771	44.4813	11.7698	0.264601	39.9216	36.5904	39.5094	51.6802	57.3729	54.858	40.7206	35.1973
Tmem127	0.0540387	0.549593	24	11.1454	2.06554	0.0440476	0.413932	24	15	2.2554	0.186973	1	24	11.8341	40.3569	0.0171325	0.23032	24	12.6238	37.5107	2.33595	0.0622741	35.5358	34.5619	36.2304	39.7651	40.9891	38.1143	37.5691	37.3199
Ndufs3	0.0616593	0.568498	24	11.8481	8.48378	0.0440476	0.413932	24	15	7.98892	0.164703	1	24	12.9698	79.9879	0.0172003	0.231002	24	13.2637	69.5192	11.0605	0.1591	63.4835	58.8784	67.8379	74.4114	76.5567	84.251	66.7619	63.9731
Mmab	0.0623509	0.568584	24	23.9466	4.19025	0.0440476	0.413932	24	3	3.88994	0.163383	1	24	1.60952	21.5738	0.0172417	0.231328	24	1.52123	17.9344	5.71977	0.318927	20.8997	22.5191	19.2172	16.3109	13.4942	10.7186	19.6001	20.7153
Zkscan8	0.012614	0.43274	24	23.2241	2.44503	0.249206	0.801565	24	0	2.55279	0.144452	1	24	7.73643e-05	16.6084	0.0174009	0.233148	24	23.7418	14.5243	2.59476	0.17865	16.2953	16.4336	13.9761	12.5802	12.9283	11.5175	15.5363	16.9269
Pgls	0.213583	0.765352	24	13.1246	2.66928	0.0138889	0.278415	24	16.5	3.57376	0.153197	1	24	14.5812	36.5752	0.0174117	0.233148	24	14.73	31.5114	5.08124	0.161251	28.6679	28.4249	28.5704	29.5274	37.1166	36.2502	33.146	30.3879
2210418O10Rik	0.0108562	0.409211	24	10.5564	0.317148	0.249206	0.801565	24	12	0.329517	0.168285	1	24	11.6169	3.84836	0.0174365	0.233249	24	11.3924	3.53068	0.320763	0.0908504	3.34394	3.59484	3.70905	3.70177	3.87252	3.72821	3.15149	3.14357
Exd1	0.0450053	0.530695	24	10.6397	1.19826	0.0440476	0.413932	24	10.5	0.572476	0.230745	1	24	11.0401	4.65877	0.0174997	0.233586	24	10.7265	3.12796	1.20069	0.383857	2.43079	2.67046	2.58021	4.97426	4.67681	3.02917	2.40509	2.25693
Tjp2	0.024222	0.482512	24	23.086	7.7139	0.113095	0.577886	24	0	8.35655	0.167047	1	24	1.1246	33.5669	0.0175052	0.233586	24	0.0693637	27.5333	8.32313	0.302293	32.6549	34.074	30.6399	17.8148	19.6307	21.2375	32.5101	31.7044
Ceacam1	0.169112	0.725101	24	0.610597	9.62635	0.0138889	0.278415	24	3	10.8701	0.195044	1	24	3.27039	75.6924	0.0175201	0.233586	24	2.30743	64.5959	16.054	0.248529	69.6569	80.0623	70.3106	63.4507	52.994	44.0728	67.84	68.3795
AU021092	0.0189129	0.453111	24	9.92478	0.273274	0.113095	0.577886	24	12	0.261186	0.214342	1	24	10.2874	1.90126	0.0175306	0.233586	24	10.732	1.5828	0.267836	0.169217	1.27327	1.36091	1.63951	1.93765	1.84689	1.66438	1.35459	1.58522
Rps4x	0.160083	0.71617	24	12.3321	23.4202	0.0138889	0.278415	24	15	19.6447	0.206835	1	24	14.065	234.153	0.0175721	0.233784	24	13.8046	198.002	34.8226	0.17587	175.068	175.274	182.765	201.573	219.602	253.818	190.389	185.525
Ugt2a3	0.0614618	0.568482	24	12.202	50.6082	0.0440476	0.413932	24	15	53.2812	0.169966	1	24	12.8963	354.494	0.01758	0.233784	24	13.3555	288.908	69.0831	0.239118	269.882	225.653	275.303	302.36	356.778	358.241	277.497	245.548
Cmtm8	0.226124	0.772198	24	7.5739	1.99028	0.0138889	0.278415	24	7.5	3.52789	0.147163	1	24	6.02689	28.4766	0.0176403	0.234356	24	7.03653	24.4436	3.30251	0.135107	22.4816	27.5006	28.1135	27.2717	23.2351	22.4692	22.3645	22.1125
Rab3d	0.128007	0.691599	24	11.9438	1.44557	0.0138889	0.278415	24	13.5	0.999228	0.261134	1	24	12.1989	10.4307	0.0177016	0.234941	24	12.5452	8.52773	1.71865	0.201537	8.01261	6.41936	8.33192	8.64711	11.6176	9.1541	8.56985	7.46935
Tra2b	0.0148715	0.441005	24	21.9338	5.27897	0.113095	0.577886	24	0	4.55686	0.279028	1	24	7.73643e-05	45.431	0.0178496	0.236673	24	23.319	34.4368	5.08538	0.147673	44.8217	40.7244	31.1237	31.9278	27.4353	33.4208	32.4825	33.5583
Mrpl37	0.0222789	0.47078	24	10.6328	2.84675	0.113095	0.577886	24	12	2.90878	0.187032	1	24	11.72	24.3	0.017907	0.237175	24	11.4523	20.8652	2.89614	0.138802	18.9962	20.3109	21.2061	23.1939	24.1884	22.9685	17.2503	18.8077
Lztr1	0.058154	0.561286	24	11.1681	1.99641	0.0440476	0.413932	24	13.5	2.38594	0.184178	1	24	12.1187	31.9151	0.0179225	0.237175	24	12.26	28.7815	2.19799	0.0763679	25.8513	26.91	26.8503	30.1926	32.4696	30.4915	28.3081	29.1788
Slc6a8	0.163729	0.717814	24	8.62937	0.26134	0.0138889	0.278415	24	7.5	0.220455	0.20795	1	24	6.3729	4.32661	0.0179548	0.237366	24	7.50075	3.90486	0.370411	0.094859	3.72978	3.8773	4.51536	4.16449	3.84273	3.86137	3.59381	3.65407
Ift46	0.0720754	0.598465	24	8.72998	2.55245	0.0440476	0.413932	24	7.5	2.87962	0.149135	1	24	8.44097	20.6031	0.0179719	0.237366	24	8.22457	16.9638	3.18152	0.187548	15.4079	16.4079	20.8567	20.2441	18.32	15.0127	13.8776	15.5835
Dffa	0.232075	0.773585	24	12.9567	0.800247	0.0138889	0.278415	24	15	1.07958	0.14766	1	24	13.3108	12.4089	0.0180446	0.238093	24	13.7507	11.1579	1.23841	0.110989	10.6749	8.85872	10.3477	11.4234	12.5708	12.2166	11.8596	11.3115
Snd1	0.0260721	0.482512	24	11.219	12.0475	0.113095	0.577886	24	12	11.98	0.162031	1	24	11.9005	171.377	0.0180979	0.238564	24	11.7068	158.803	12.7498	0.0802868	147.905	150.983	153.388	175.979	165.625	169.334	159.814	147.399
Arsg	0.229156	0.772198	24	1.40422	4.71391	0.0138889	0.278415	24	3	6.68524	0.151994	1	24	3.90738	25.6456	0.0182725	0.240633	24	2.77472	17.2176	9.32016	0.541315	18.5074	26.987	24.9151	14.9517	9.56215	10.0529	14.7899	17.9748
Plk3	0.022363	0.47078	24	9.68764	17.9874	0.113095	0.577886	24	12	18.8793	0.191878	1	24	9.06327	54.2046	0.0183172	0.240987	24	10.2364	31.1691	17.8573	0.572917	14.2889	15.4835	48.4864	52.3165	46.2915	25.465	24.9355	22.0856
Anxa11	0.0461705	0.532927	24	10.67	2.74105	0.0440476	0.413932	24	10.5	1.88624	0.239205	1	24	10.9951	17.9299	0.0183517	0.240987	24	10.7217	14.8681	2.74681	0.184745	13.0157	14.7389	14.9437	16.9472	19.7499	13.6812	14.1541	11.7145
Sugp2	0.0205248	0.459722	24	22.9117	2.01537	0.113095	0.577886	24	22.5	2.17481	0.210104	1	24	20.9999	17.058	0.0183876	0.240987	24	22.1409	14.3974	1.98586	0.137931	14.6362	15.8943	13.4386	12.0308	13.1368	12.8823	16.4486	16.712
Psmd3	0.277114	0.787635	24	6.89092	3.43393	0.0138889	0.278415	24	6	5.38735	0.126864	1	24	5.82092	60.8249	0.0184041	0.240987	24	6.23654	53.767	7.12236	0.132467	52.0498	58.4676	62.7581	55.9315	54.0663	47.7012	48.4611	50.7002
Acd	0.0262835	0.482512	24	9.641	1.18212	0.113095	0.577886	24	9	1.26378	0.164393	1	24	9.20413	8.00973	0.0184154	0.240987	24	9.28162	6.5747	1.2573	0.191234	5.67184	6.16259	7.5256	7.66383	8.13229	6.05835	5.41835	5.96473
Usp37	0.00708066	0.363447	24	21.9571	0.974197	0.249206	0.801565	24	0	0.686962	0.277063	1	24	7.73643e-05	15.1091	0.018422	0.240987	24	23.3264	12.886	0.940449	0.0729823	14.932	14.328	12.4979	11.9729	12.2431	11.9835	12.7442	12.3862
Tpst2	0.0958653	0.639936	24	20.613	2.21931	0.0440476	0.413932	24	21	3.16023	0.116017	1	24	18.6897	25.7621	0.0184513	0.240987	24	20.1085	22.5216	2.83249	0.125768	22.906	21.2353	19.2978	18.2197	22.6096	25.1987	25.0737	25.6322
Car14	0.254094	0.777665	24	1.22774	3.18489	0.0138889	0.278415	24	3	5.54149	0.138896	1	24	3.36975	36.6693	0.0184594	0.240987	24	2.53846	30.3288	5.92007	0.195196	32.7321	38.6189	35.6391	27.5319	27.2268	23.5676	27.8935	29.4206
Prcp	0.0557798	0.555627	24	22.0119	0.452243	0.0440476	0.413932	24	21	0.368443	0.199506	1	24	20.9999	7.91415	0.0184595	0.240987	24	21.3364	7.0818	0.472856	0.0667706	7.20234	6.80453	6.79992	6.24674	7.00033	7.32328	7.27055	8.00671
Cxcl12	0.284033	0.788912	24	18.8129	22.8175	0.0138889	0.278415	24	18	33.0735	0.125281	1	24	17.25	227.518	0.0185767	0.242247	24	18.0208	186.381	49.9045	0.267755	198.09	144.924	140.836	168.431	176.319	231.515	228.483	202.452
Gnb2	0.0262902	0.482512	24	9.04325	6.73599	0.113095	0.577886	24	9	6.89975	0.166453	1	24	8.27825	62.1815	0.0185968	0.242247	24	8.77418	55.0326	7.67012	0.139374	46.0693	56.0796	61.8712	60.8479	60.7092	53.0272	49.2904	52.366
Fbxo2	0.172284	0.726842	24	21.1607	0.0181122	0.0138889	0.278415	24	19.5	0.0173802	0.207018	1	24	18.58	0.0923292	0.0186096	0.242247	24	19.7421	0.0644589	0.0235735	0.0235735	0.0643066	0.0513549	0.0537543	0.0289201	0.0595772	0.0665753	0.110579	0.0806045
Khdrbs1	0.0865687	0.629679	24	8.8947	2.18536	0.0440476	0.413932	24	7.5	2.9965	0.130226	1	24	6.99037	25.0326	0.0186448	0.242471	24	7.79199	22.1817	2.89211	0.130383	21.427	23.5719	26.044	23.4542	24.3969	20.5385	18.2731	19.7481
Slc39a14	0.0245394	0.482512	24	10.7477	34.8431	0.113095	0.577886	24	12	28.5814	0.179156	1	24	11.7292	193.333	0.0186632	0.242479	24	11.4933	149.922	35.7172	0.238239	112.717	137.862	127.935	197.351	190.975	162.743	138.997	130.794
Nfx1	0.0872391	0.630831	24	8.49988	8.89666	0.0440476	0.413932	24	9	10.9329	0.129755	1	24	7.32681	67.3391	0.0187037	0.242771	24	8.27735	54.6445	11.0528	0.202267	48.6415	58.9554	64.5589	70.5072	54.8408	49.1991	41.6605	48.7926
Sh3bp1	0.0328765	0.504601	24	21.5186	0.240725	0.113095	0.577886	24	21	0.270576	0.134309	1	24	20.9999	1.86087	0.0187261	0.24283	24	21.1727	1.55963	0.259293	0.166252	1.6977	1.41226	1.42449	1.18572	1.37028	1.76424	1.74161	1.88077
Fez2	0.174628	0.728792	24	12.5428	1.86066	0.0138889	0.278415	24	15	2.32259	0.206619	1	24	13.1311	27.3024	0.0187766	0.243085	24	13.5506	24.5314	2.69621	0.109909	23.8192	21.0298	23.8669	24.2061	28.0013	27.196	24.2997	23.8321
Acp2	0.0655131	0.577598	24	0.150993	5.94506	0.0440476	0.413932	24	3	5.91455	0.173722	1	24	1.4033	56.6842	0.0187816	0.243085	24	1.51534	52.1203	8.28568	0.158972	55.7667	58.2108	53.4049	49.8293	47.2745	41.6428	52.6907	58.1427
Homer2	0.083769	0.624058	24	12.6184	11.0645	0.0440476	0.413932	24	15	12.6065	0.136693	1	24	13.5758	47.365	0.0188701	0.243735	24	13.7288	31.3146	16.6678	0.53227	24.9124	18.6418	22.093	34.4149	45.4276	49.7317	32.5378	22.7573
Ptpmt1	0.0309488	0.499907	24	11.9962	8.03747	0.113095	0.577886	24	15	8.48398	0.144166	1	24	12.6705	48.3404	0.0188767	0.243735	24	13.2079	38.4183	10.5421	0.274404	34.1983	31.044	35.3703	42.8885	47.1256	49.2657	36.878	30.576
Bcl7b	0.21773	0.766985	24	13.0272	0.957309	0.0138889	0.278415	24	15	1.13349	0.167038	1	24	14.1499	10.4649	0.0188917	0.243735	24	14.0601	8.91279	1.58826	0.1782	8.347	7.0613	7.92876	9.28335	9.74088	11.2512	8.98452	8.70528
Trpm8	0.0592964	0.563482	24	9.88351	0.0488248	0.0440476	0.413932	24	9	0.0555778	0.193768	1	24	8.98465	0.211529	0.0189197	0.243735	24	9.28879	0.138077	0.0514898	0.0514898	0.141475	0.128387	0.161263	0.231361	0.178732	0.0998629	0.082934	0.0806045
Mepce	0.0223672	0.47078	24	10.0397	3.13505	0.113095	0.577886	24	12	2.46719	0.200096	1	24	9.21531	20.1078	0.0189218	0.243735	24	10.4098	16.2237	3.12147	0.192402	12.9771	13.8915	16.9864	21.4587	18.2008	15.8116	16.0892	14.3745
St6galnac3	0.323306	0.788912	24	2.87428	0.319807	0.0138889	0.278415	24	4.5	0.6218	0.113093	1	24	4.43381	1.88863	0.0189696	0.244118	24	3.93949	1.17142	0.84563	0.721885	1.28613	1.97716	1.74701	1.38816	0.625561	0.499314	0.746406	1.10159
Smc2	0.0186354	0.453111	24	23.0145	1.24109	0.113095	0.577886	24	21	0.973818	0.242188	1	24	7.63813e-05	4.53955	0.0190443	0.244827	24	22.6806	4.36661	1.23814	0.283548	4.61722	4.05704	4.64975	2.57389	3.30654	4.19424	5.05897	6.47523
Actg1	0.0310548	0.499907	24	23.5805	13.5196	0.113095	0.577886	24	0	14.5281	0.145495	1	24	7.73643e-05	54.2389	0.0190608	0.244827	24	23.8603	40.3934	14.6407	0.362453	53.7989	49.994	45.933	25.9992	31.3674	27.4956	32.5654	55.9932
Pomt1	0.0266208	0.482917	24	22.9104	1.803	0.113095	0.577886	24	3	2.04369	0.170362	1	24	7.73643e-05	16.2969	0.0191155	0.245297	24	0.604682	13.5618	1.98177	0.146129	16.1152	15.4835	14.1374	11.1342	12.8091	11.2179	13.5182	14.0789
Nampt	0.0854668	0.626145	24	12.4766	49.8719	0.0440476	0.413932	24	15	60.3436	0.136548	1	24	13.0661	177.346	0.0191482	0.245299	24	13.5061	106.411	71.3435	0.670455	76.1519	40.9299	63	133.929	161.395	192.436	107.676	75.7682
Slc25a29	0.241246	0.777332	24	13.2175	0.329371	0.0138889	0.278415	24	16.5	0.457472	0.153767	1	24	14.026	2.19721	0.0191818	0.245299	24	14.5637	1.56758	0.614617	0.392081	1.22183	1.15549	1.04821	1.47493	2.11499	2.36342	1.60339	1.55835
Atp6v0b	0.165671	0.720525	24	12.5254	9.26346	0.0138889	0.278415	24	15	9.07563	0.223933	1	24	13.1316	56.624	0.0191831	0.245299	24	13.545	42.4749	13.3928	0.315311	36.9506	32.2766	34.779	45.1443	52.5471	62.7472	37.8732	37.4811
Glipr2	0.064529	0.57668	24	0.382546	0.485771	0.0440476	0.413932	24	1.5	0.519838	0.181436	1	24	3.16469	1.34111	0.0191957	0.245299	24	1.67826	0.937456	0.710733	0.710733	1.04177	1.592	1.10196	0.636242	0.417041	0.432739	0.746406	1.53148
Mettl3	0.0601942	0.566318	24	23.1936	0.955859	0.0440476	0.413932	24	1.5	0.816838	0.194863	1	24	7.73643e-05	11.785	0.0192231	0.245299	24	0.227681	10.3727	1.05168	0.101389	11.7553	11.144	10.0252	10.498	9.23447	8.85451	10.6156	10.8547
Slc12a2	0.0893828	0.63432	24	20.4187	2.97344	0.0440476	0.413932	24	21	3.63823	0.131239	1	24	17.949	19.105	0.0192242	0.245299	24	19.806	15.8011	4.03909	0.255621	18.4046	13.6604	12.2291	11.5102	15.5199	16.9434	20.6229	17.518
Bmp10	0.0578594	0.560385	24	9.93292	0.652177	0.0440476	0.413932	24	9	0.781523	0.204154	1	24	8.98075	4.12321	0.0193272	0.246381	24	9.30385	3.16386	0.685669	0.216719	3.13816	2.64478	3.92406	4.01989	3.78315	2.72959	2.62624	2.445
2010300C02Rik	0.303536	0.788912	24	19.4084	0.0293116	0.0138889	0.278415	24	18	0.0633323	0.124508	1	24	18.321	0.180182	0.0194585	0.247822	24	18.575	0.109951	0.0546706	0.0546706	0.102891	0.0256775	0.0537543	0.0867603	0.0893659	0.166438	0.193513	0.161209
Zfp512	0.0922329	0.635516	24	0.650241	1.28364	0.0440476	0.413932	24	3	1.66232	0.129539	1	24	3.32554	11.1929	0.0194977	0.247958	24	2.33866	9.66584	2.16227	0.223702	10.4177	11.3238	11.0734	8.90739	8.13229	7.62287	9.3439	10.5054
Gm15446	0.0374723	0.512574	24	21.1131	0.899499	0.0440476	0.413932	24	21	0.621076	0.319017	1	24	20.9999	5.25885	0.0195058	0.247958	24	21.0377	5.00169	0.98908	0.197749	6.76506	4.98143	4.1122	4.36694	4.40872	5.02643	5.08662	5.26616
Sdc4	0.0252825	0.482512	24	9.70278	41.8433	0.113095	0.577886	24	12	37.1684	0.184484	1	24	7.15996	390.125	0.0195326	0.248019	24	9.62699	353.44	43.2799	0.122453	292.827	358.432	399.69	371.392	390.171	358.574	340.251	316.184
Cnot10	0.0249084	0.482512	24	10.9006	1.45076	0.113095	0.577886	24	12	1.49544	0.187437	1	24	11.9415	19.4535	0.0195472	0.248019	24	11.6151	17.7331	1.50661	0.08496	16.4625	17.4607	17.8464	18.5089	19.3924	19.3068	16.2827	16.6045
Ttc19	0.0236749	0.480458	24	11.1333	1.78573	0.113095	0.577886	24	12	1.68293	0.198191	1	24	11.8384	17.6223	0.0196225	0.248742	24	11.6576	15.2772	1.87769	0.122908	14.3404	14.9186	14.4868	17.005	17.7838	16.2111	13.85	13.6222
Fmnl2	0.0639963	0.576451	24	23.8696	2.25261	0.0440476	0.413932	24	1.5	2.04974	0.18866	1	24	2.77074	12.6414	0.0196553	0.248924	24	1.38308	10.7039	2.99119	0.27945	11.3437	14.4307	10.5627	9.54363	7.71525	8.6215	10.9196	12.4937
Pomk	0.0302436	0.497367	24	23.3965	0.987172	0.113095	0.577886	24	3	1.01027	0.155764	1	24	7.73643e-05	6.97058	0.0196828	0.249039	24	0.768791	6.01433	1.16054	0.192962	6.80364	7.08698	6.10111	4.8875	5.57047	4.76013	6.02654	6.87825
Stard5	0.0407064	0.52236	24	12.206	17.1339	0.113095	0.577886	24	15	20.1833	0.11661	1	24	12.7986	94.4331	0.019798	0.250192	24	13.3229	71.6478	23.2735	0.324832	59.7666	53.8713	58.1084	82.3355	92.5532	93.8378	74.8894	57.8203
Nckap5	0.255505	0.777665	24	2.1892	0.208937	0.0138889	0.278415	24	3	0.298984	0.151405	1	24	4.14509	1.16658	0.0198108	0.250192	24	3.1102	0.834473	0.469621	0.469621	0.848848	1.2582	1.10196	0.838683	0.625561	0.399452	0.635827	0.967254
Tnfsf14	0.045888	0.532927	24	23.261	0.0787276	0.0440476	0.413932	24	22.5	0.0760671	0.266444	1	24	7.73643e-05	0.231057	0.0198465	0.25041	24	23.2537	0.177552	0.0807458	0.0807458	0.231504	0.179742	0.161263	0.11568	0.148943	0.0665753	0.221157	0.29555
Chrac1	0.0265959	0.482917	24	10.9165	1.12639	0.113095	0.577886	24	12	1.18369	0.179558	1	24	11.9817	9.42574	0.01989	0.250507	24	11.6338	8.02833	1.17178	0.145956	6.85509	7.72891	7.79437	8.87847	9.20468	9.35382	7.04939	7.36187
Bfar	0.012071	0.4276	24	11.639	7.53263	0.249206	0.801565	24	12	7.14541	0.179554	1	24	11.9892	47.3925	0.0198912	0.250507	24	11.8761	39.2936	8.17912	0.208154	37.0792	34.3308	39.5363	44.4791	46.4702	47.0687	35.9104	29.4744
Ist1	0.0157691	0.443614	24	11.5093	5.29295	0.249206	0.801565	24	15	5.58939	0.137635	1	24	12.0125	45.0193	0.0199123	0.25054	24	12.8116	38.9397	6.31817	0.162255	36.0246	33.7659	37.8699	44.0453	43.5807	44.7386	37.1821	34.3106
Map9	0.0285187	0.49079	24	22.9946	0.242289	0.113095	0.577886	24	3	0.248452	0.168311	1	24	7.73643e-05	1.10453	0.0199684	0.251013	24	0.632912	0.82394	0.269552	0.269552	1.09321	1.0271	0.886946	0.607322	0.595772	0.499314	0.995208	0.886649
Elmo3	0.0680284	0.586421	24	9.53273	2.63686	0.0440476	0.413932	24	7.5	3.18404	0.181532	1	24	8.90153	22.3003	0.0199995	0.25117	24	8.64779	19.1746	2.98871	0.155868	18.083	19.0527	22.7112	20.5911	22.9074	17.8089	15.3428	16.9001
Tfcp2	0.0208819	0.463112	24	22.1472	1.19457	0.113095	0.577886	24	1.5	1.14654	0.231429	1	24	21	7.29048	0.0200727	0.251857	24	22.8367	7.1418	1.18111	0.16538	8.87432	8.34517	7.09557	5.43698	5.98751	7.28999	6.66237	7.44248
Elk3	0.0214592	0.466147	24	23.3129	1.13048	0.113095	0.577886	24	22.5	0.952021	0.225855	1	24	1.60601	8.06212	0.0201173	0.252183	24	23.7925	7.67039	1.20815	0.157509	8.07691	7.72891	8.22441	6.30458	6.49392	7.02369	8.34869	9.16204
Elovl6	0.0712914	0.595971	24	11.9552	87.3297	0.0440476	0.413932	24	15	77.6929	0.174917	1	24	12.5103	278.075	0.0201495	0.252353	24	13.1381	157.652	112.997	0.716752	91.0968	82.9125	112.185	163.63	332.947	222.628	165.564	90.2501
Slc25a28	0.0134336	0.438527	24	10.3655	2.44721	0.249206	0.801565	24	12	2.37285	0.164402	1	24	9.96036	15.2003	0.0201804	0.252506	24	10.7705	12.3239	2.44142	0.198104	10.5591	9.80879	13.1429	15.3566	14.7156	13.082	10.5879	11.3384
Vps36	0.313666	0.788912	24	7.13452	0.654827	0.0138889	0.278415	24	6	1.26364	0.126547	1	24	5.63173	24.3265	0.0202064	0.252599	24	6.2538	22.7788	1.33534	0.0586221	22.8417	23.6489	24.8614	23.2807	22.6989	21.4039	21.8393	21.6557
D10Jhu81e	0.053842	0.549593	24	10.9444	6.80171	0.0440476	0.413932	24	12	6.8525	0.233253	1	24	12.1917	70.0843	0.0202596	0.25303	24	11.7133	62.7007	7.11578	0.113488	55.5995	60.0082	66.3328	61.7733	73.3098	68.9387	58.4408	57.2023
Tlr4	0.0249831	0.482512	24	22.9465	0.882926	0.113095	0.577886	24	0	0.746682	0.196326	1	24	7.73643e-05	6.0576	0.0203025	0.253242	24	23.6498	5.35446	0.920633	0.171938	6.13485	5.36659	5.07978	5.23454	3.99167	4.82671	5.86067	6.34088
Slc25a26	0.0444894	0.529901	24	9.83794	0.610263	0.0440476	0.413932	24	12	0.413985	0.283601	1	24	7.24755	5.20229	0.0203319	0.253242	24	9.70535	4.76296	0.627298	0.131703	3.57545	4.75033	5.2948	4.94534	5.33216	4.95986	4.89311	4.35264
Atp5g1	0.212433	0.764085	24	13.0488	11.0766	0.0138889	0.278415	24	15	13.4108	0.188372	1	24	13.0798	131.093	0.0203326	0.253242	24	13.7033	113.466	17.0458	0.150228	109.669	93.9795	100.225	118.659	125.768	137.311	111.933	110.186
Azi2	0.0490515	0.536045	24	10.6234	2.94729	0.0440476	0.413932	24	10.5	2.69828	0.257886	1	24	9.20303	48.643	0.020372	0.2535	24	10.1109	44.6121	2.94057	0.0659142	45.3362	42.6759	45.6374	49.9739	46.649	44.0062	42.0475	40.5709
Serpinb9	0.23788	0.777332	24	6.94208	1.52071	0.0138889	0.278415	24	6	1.76192	0.169856	1	24	6.14484	10.3425	0.0204841	0.25466	24	6.36178	7.69843	3.0533	0.396613	6.30205	9.16685	10.8584	8.96523	7.80462	5.82534	5.14191	7.52308
Taf1a	0.0537818	0.549593	24	10.1731	0.895067	0.0440476	0.413932	24	10.5	0.690359	0.237406	1	24	9.11437	6.51019	0.0205183	0.254852	24	9.93048	5.46264	0.906266	0.165903	4.86158	4.87872	5.85922	7.14326	5.48111	5.82534	5.00368	4.64819
Grhpr	0.0236843	0.480458	24	10.8563	15.4706	0.113095	0.577886	24	10.5	16.4752	0.210789	1	24	11.4754	131.602	0.0205801	0.255386	24	10.9436	113.379	15.6028	0.137616	110.132	105.303	116.754	129.678	128.449	124.462	93.3008	98.9554
Amdhd1	0.337811	0.788912	24	2.53557	28.6813	0.0138889	0.278415	24	4.5	52.2231	0.121065	1	24	4.13845	211.248	0.0206752	0.256255	24	3.72912	146.686	72.6242	0.4951	170.22	202.544	222.973	142.056	112.214	72.0677	116.025	135.389
Hmgxb4	0.0836579	0.624058	24	23.7744	1.39394	0.0440476	0.413932	24	3	2.13315	0.154428	1	24	1.85368	9.07676	0.0207043	0.256255	24	1.55227	7.17472	1.87051	0.260709	8.79715	9.06414	8.89634	5.26346	5.92793	5.25945	6.80059	7.38874
Tkt	0.257475	0.778806	24	13.5902	14.9054	0.0138889	0.278415	24	16.5	22.0912	0.159157	1	24	14.744	163.655	0.0207069	0.256255	24	14.9397	134.323	30.9205	0.230196	124.703	108.975	120.356	121.84	161.425	166.871	140.933	129.478
Pnpla7	0.253507	0.777665	24	8.33488	6.8349	0.0138889	0.278415	24	7.5	11.2552	0.16225	1	24	5.32036	128.129	0.020766	0.256704	24	7.06361	114.585	10.7452	0.0937752	113.488	125.845	130.677	118.399	114.388	114.31	95.4018	104.168
Micu1	0.357889	0.788912	24	2.83759	1.3289	0.0138889	0.278415	24	6	2.89077	0.115081	1	24	3.94559	21.7727	0.0207871	0.256704	24	4.25173	18.9419	3.51533	0.185585	20.6682	21.4407	21.8511	19.55	17.2178	16.4774	15.0387	19.2913
Senp6	0.0840329	0.624304	24	23.7106	5.26191	0.0440476	0.413932	24	3	6.60483	0.154741	1	24	6.36946e-05	65.8136	0.0208077	0.256704	24	0.876209	57.3481	6.44131	0.11232	66.8403	61.0867	62.4356	57.5799	46.8277	50.7969	55.317	57.9009
Layn	0.282911	0.788912	24	13.9967	0.151139	0.0138889	0.278415	24	16.5	0.180994	0.145944	1	24	15.1052	1.27382	0.020827	0.256704	24	15.1989	0.968158	0.340348	0.340348	0.887432	0.641936	0.833192	0.925443	1.07239	1.36479	1.13343	0.886649
Ddx58	0.243077	0.777332	24	1.92585	6.8163	0.0138889	0.278415	24	3	8.39024	0.169976	1	24	4.21868	40.2879	0.0208379	0.256704	24	3.04743	30.1094	14.8531	0.493304	30.9701	41.8543	39.16	30.1637	22.6989	14.813	27.1194	34.0957
Lrrc42	0.0264505	0.482512	24	10.4799	1.17991	0.113095	0.577886	24	10.5	1.29062	0.19247	1	24	11.7337	10.5168	0.020891	0.256779	24	10.9029	9.44842	1.1812	0.125016	8.29556	9.57769	10.0252	10.3534	10.0686	10.7519	8.2934	8.22166
Zfp493	0.208538	0.760571	24	19.6016	0.493188	0.0138889	0.278415	24	18	0.460713	0.198927	1	24	17.2367	2.38769	0.0209023	0.256779	24	18.2749	1.72242	0.965564	0.560585	2.22501	1.20684	1.07509	1.24356	1.3107	2.43	2.48802	1.80017
Fzd5	0.0224072	0.47078	24	22.1312	2.17596	0.113095	0.577886	24	0	1.88226	0.227501	1	24	18.5475	12.767	0.0209122	0.256779	24	21.6148	12.3414	2.2327	0.180911	14.8934	14.7389	12.3635	9.37011	9.77067	12.1833	13.1865	12.225
Gde1	0.254238	0.777665	24	14.0373	15.7201	0.0138889	0.278415	24	15	19.5173	0.163348	1	24	14.7727	77.6192	0.0209198	0.256779	24	14.6038	47.8321	31.27	0.653746	42.2752	25.4207	25.7752	43.062	65.7733	86.0818	56.0081	38.2603
Eps8l2	0.030768	0.499907	24	23.7493	22.7893	0.113095	0.577886	24	1.5	25.242	0.165995	1	24	2.82809	67.4209	0.0209427	0.256827	24	1.36309	50.2579	29.7731	0.592406	59.0463	71.1265	63.3226	27.5898	23.3841	29.393	57.8603	70.3408
Aph1a	0.0264449	0.482512	24	10.4342	4.83796	0.113095	0.577886	24	12	3.85938	0.19371	1	24	11.6049	31.6812	0.0209907	0.257184	24	11.3481	26.4017	4.85319	0.183821	21.427	24.2138	28.8661	27.7055	34.525	27.6953	23.0833	23.6977
Fam228b	0.0640305	0.576451	24	23.0842	0.439874	0.0440476	0.413932	24	1.5	0.410324	0.207686	1	24	7.73643e-05	2.29741	0.0211685	0.259128	24	0.191466	1.69042	0.47868	0.283171	2.27645	2.07987	1.74701	1.41708	1.34049	0.898766	1.99042	1.7733
Cldn8	0.0284764	0.49079	24	22.1598	0.0798044	0.113095	0.577886	24	21	0.0803948	0.18235	1	24	20.9999	0.340908	0.0212104	0.259348	24	21.3852	0.200796	0.0826169	0.0826169	0.231504	0.128387	0.161263	0.11568	0.148943	0.166438	0.331736	0.322418
Zmat1	0.014592	0.441005	24	22.3353	0.98492	0.249206	0.801565	24	0	1.07221	0.161639	1	24	7.73643e-05	4.23655	0.0212248	0.259348	24	23.4491	3.28734	0.981966	0.298711	4.26996	3.33807	3.03712	2.40037	2.47246	2.46328	4.36786	3.94962
Hist2h2bb	0.238719	0.777332	24	12.896	1.26757	0.0138889	0.278415	24	16.5	1.76316	0.177924	1	24	13.6904	6.25887	0.0212836	0.259833	24	14.3365	3.92123	2.19488	0.559743	2.67516	2.10555	2.4727	3.38365	6.25561	6.82396	3.67674	3.97649
Vps45	0.014788	0.441005	24	22.6407	0.873419	0.249206	0.801565	24	1.5	0.702379	0.16124	1	24	7.73643e-05	8.53555	0.0214023	0.260819	24	0.0457841	7.65469	0.906363	0.118406	8.38558	8.49924	7.04181	7.25895	6.58328	7.09027	8.21047	8.16792
Scaper	0.272413	0.784861	24	1.64177	1.77161	0.0138889	0.278415	24	3	2.75466	0.157059	1	24	3.80073	15.3107	0.0214029	0.260819	24	2.81667	12.1587	3.60776	0.296723	12.7584	15.9714	15.1318	11.1921	10.3367	8.15547	11.4449	12.2787
Tmem181a	0.102279	0.654116	24	8.28399	0.851662	0.0440476	0.413932	24	7.5	1.0964	0.132122	1	24	7.34437	5.82296	0.0214304	0.26092	24	7.70895	4.62552	1.18539	0.256272	3.96129	5.05846	6.02048	5.43698	5.2428	3.66164	3.53852	4.08396
Rab34	0.0762092	0.609326	24	11.7131	0.895698	0.0440476	0.413932	24	15	0.926428	0.177836	1	24	12.5084	4.79157	0.0214782	0.26124	24	13.056	3.5953	1.12158	0.311958	2.76519	2.6191	3.1715	4.22233	4.34914	5.25945	3.15149	3.22418
Btnl9	0.0298108	0.496417	24	22.0095	2.4066	0.113095	0.577886	24	22.5	2.51665	0.177249	1	24	20.8033	11.2976	0.0214953	0.26124	24	21.7729	9.14261	2.45923	0.268986	10.3276	10.348	7.04181	6.96974	6.7918	8.38848	12.6336	10.6398
Hemk1	0.0720048	0.598465	24	9.31997	2.42853	0.0440476	0.413932	24	9	2.30397	0.188797	1	24	8.89432	14.4752	0.0215286	0.26141	24	9.07139	11.3021	2.65375	0.234801	9.46594	12.2995	11.7722	15.935	12.8985	9.6867	8.90158	9.45759
Arhgef26	0.0278755	0.489302	24	10.243	13.6337	0.113095	0.577886	24	12	9.79151	0.191412	1	24	9.466	43.2868	0.0216565	0.262538	24	10.5636	26.4277	13.5881	0.514163	16.231	21.0298	28.221	43.8429	45.0404	19.0405	22.8621	15.1536
Dact1	0.024444	0.482512	24	11.4879	0.828733	0.113095	0.577886	24	12	0.695222	0.218458	1	24	11.5692	4.86363	0.0216697	0.262538	24	11.6856	3.89632	0.881076	0.22613	3.72978	3.4151	3.57466	4.85858	4.94491	4.09438	3.73203	2.82116
Csnk1a1	0.340005	0.788912	24	2.042	5.68868	0.0138889	0.278415	24	4.5	11.4376	0.127965	1	24	3.76867	134.835	0.0216796	0.262538	24	3.44267	121.946	13.3348	0.10935	127.842	137.297	131.617	124.79	113.554	104.756	118.457	117.253
Pde6c	0.0741001	0.603444	24	9.1974	0.31517	0.0440476	0.413932	24	9	0.267132	0.186212	1	24	8.3404	0.901584	0.0217756	0.263465	24	8.84625	0.466689	0.354409	0.354409	0.282949	0.282452	1.02133	0.838683	0.565984	0.332876	0.221157	0.188077
Etv6	0.0178361	0.451707	24	23.5771	3.5318	0.249206	0.801565	24	0	3.72376	0.137307	1	24	7.73643e-05	18.3001	0.0218449	0.264068	24	23.8591	15.3657	3.82397	0.248864	18.0059	18.1026	15.7231	12.7248	12.8091	10.5855	15.9786	18.9958
Ado	0.0352062	0.507372	24	21.2537	2.70422	0.113095	0.577886	24	21	2.59989	0.153914	1	24	20.9999	19.781	0.0219138	0.264665	24	21.0845	17.4967	2.95347	0.168802	20.6167	16.4079	15.535	13.4768	17.1582	17.1764	20.0424	19.56
Carhsp1	0.0333877	0.504601	24	9.549	9.76466	0.113095	0.577886	24	9	9.64289	0.162659	1	24	7.96837	75.1882	0.0219513	0.264881	24	8.84027	65.8478	10.8472	0.164731	56.0625	66.2735	78.8844	69.7553	75.9312	65.9428	55.8975	58.0352
Rxrb	0.0277486	0.4887	24	10.5065	2.93765	0.113095	0.577886	24	12	2.51969	0.196105	1	24	11.455	21.6086	0.0219847	0.265049	24	11.3214	18.3071	2.95867	0.161613	15.2278	17.1269	17.3089	22.9915	20.0775	20.372	16.5868	16.7657
Lcn12	0.0231514	0.477511	24	22.0598	0.281738	0.113095	0.577886	24	0	0.288466	0.236718	1	24	20.9999	0.558527	0.0221043	0.266254	24	22.3455	0.453457	0.28125	0.28125	0.87457	0.744646	0.241894	0.144601	0.387252	0.199726	0.497604	0.537363
Samd5	0.0763841	0.609589	24	23.529	0.180638	0.0440476	0.413932	24	3	0.168391	0.184532	1	24	2.48971	0.922599	0.0221333	0.266366	24	1.70115	0.711769	0.237586	0.237586	0.823125	1.05278	0.75256	0.578402	0.417041	0.599177	0.718761	0.752308
Gpat4	0.0899621	0.63432	24	11.9088	37.2814	0.0440476	0.413932	24	15	40.65	0.157103	1	24	13.8424	228.168	0.0221788	0.266576	24	13.591	174.305	51.1475	0.293437	133.732	120.35	169.864	167.39	232.262	237.607	168.909	164.326
1700010I14Rik	0.0294299	0.496417	24	23.9604	0.436589	0.113095	0.577886	24	3	0.40054	0.187178	1	24	2.24126	0.90788	0.0221915	0.266576	24	1.74747	0.65836	0.615765	0.615765	0.77168	1.10413	0.671929	0.347041	0.268098	0.233013	0.608183	1.2628
Mmp19	0.0267111	0.483605	24	22.4445	6.41928	0.113095	0.577886	24	0	4.78796	0.206453	1	24	7.73643e-05	70.6413	0.0222098	0.266576	24	23.4847	61.2357	6.45558	0.105422	71.0588	63.3463	64.1826	51.3332	57.5218	57.0217	61.2329	64.188
Ak2	0.0331429	0.504601	24	11.5119	46.3565	0.113095	0.577886	24	13.5	40.0657	0.166881	1	24	11.9962	236.951	0.0222601	0.266751	24	12.3323	176.134	52.5734	0.298485	153.809	124.382	168.278	203.482	244.862	217.635	149.309	147.318
Rnaseh2a	0.183824	0.736696	24	12.2556	3.01692	0.0138889	0.278415	24	15	2.5953	0.245056	1	24	14.3696	18.96	0.0222637	0.266751	24	13.8857	14.5802	4.50508	0.308986	11.9739	10.8872	13.4655	15.7325	16.0859	22.103	13.7118	12.6818
Tmem30b	0.0275067	0.488561	24	22.2136	4.42211	0.113095	0.577886	24	0	3.95392	0.201899	1	24	7.73643e-05	38.233	0.0223297	0.267071	24	23.4095	33.6026	4.36507	0.129903	38.4554	34.4078	34.6984	27.2138	29.9078	31.2904	37.5691	35.2779
Pld6	0.0300147	0.496595	24	9.63399	0.338742	0.113095	0.577886	24	10.5	0.306395	0.185029	1	24	9.57727	1.32547	0.0223298	0.267071	24	9.90315	0.923278	0.343308	0.343308	0.643066	0.796001	1.07509	1.38816	1.22133	0.932054	0.497604	0.832913
Agbl3	0.227544	0.772198	24	19.9811	0.453144	0.0138889	0.278415	24	19.5	0.530546	0.199305	1	24	16.734	4.11723	0.0223783	0.267414	24	18.7613	3.44249	0.779158	0.226335	3.63976	3.26104	2.92961	2.34253	3.63421	3.96123	4.06377	3.70781
Wdr70	0.0895108	0.63432	24	20.9142	0.79508	0.0440476	0.413932	24	21	0.862687	0.160143	1	24	18.3202	4.91903	0.0224199	0.267676	24	20.0942	4.04437	1.00316	0.248039	4.4886	3.92865	3.22526	2.54497	3.78315	4.95986	4.56137	4.86314
Rasl11b	0.030136	0.496628	24	21.5465	0.632758	0.113095	0.577886	24	21	0.538162	0.185939	1	24	20.9999	1.78537	0.0224829	0.268191	24	21.182	1.32584	0.680512	0.513269	2.05781	1.41226	0.913823	0.347041	1.0426	1.59781	1.35459	1.88077
F12	0.0376619	0.5131	24	11.333	20.4955	0.113095	0.577886	24	15	27.1404	0.148964	1	24	12.0885	392.461	0.0225038	0.268205	24	12.7788	364.379	23.964	0.0657666	341.404	335.989	348.435	389.843	386.001	387.634	362.256	363.472
Nfs1	0.0303816	0.498428	24	11.5176	5.86724	0.113095	0.577886	24	13.5	4.98036	0.185332	1	24	12.0319	53.0899	0.0225663	0.268714	24	12.3463	46.1677	6.66607	0.144388	43.587	40.6217	47.3575	47.7471	54.7813	51.5293	42.9322	40.7859
Tra2a	0.015597	0.441005	24	21.3911	6.59904	0.249206	0.801565	24	0	5.69154	0.164441	1	24	19.4212	25.5472	0.0226302	0.269224	24	21.5901	21.8427	6.83765	0.31304	30.2627	22.1596	16.5026	16.5134	15.1326	22.2029	27.9211	24.047
Ubtd1	0.0760076	0.609326	24	12.1451	2.04593	0.0440476	0.413932	24	13.5	1.59882	0.191405	1	24	12.5072	9.32578	0.0226748	0.269224	24	12.7164	6.36333	2.51458	0.395168	5.20884	4.77601	5.02603	6.85406	9.53236	9.25396	5.446	4.8094
Atp8b1	0.0314768	0.50187	24	22.9402	14.2263	0.113095	0.577886	24	1.5	14.5497	0.180078	1	24	7.73643e-05	93.7633	0.0226813	0.269224	24	0.143933	78.7785	15.2522	0.193609	94.3636	86.3276	84.2061	67.5284	61.0667	63.0135	90.6192	83.1032
Rcc2	0.0671562	0.582981	24	11.1664	2.72697	0.0440476	0.413932	24	12	2.39401	0.216805	1	24	12.0188	28.7388	0.0226887	0.269224	24	11.7289	24.7475	2.88504	0.116579	21.6456	23.8287	21.9318	27.5319	29.1928	26.2639	23.9679	23.6171
Tor1aip2	0.347116	0.788912	24	5.39286	13.2025	0.0138889	0.278415	24	6	25.7174	0.13338	1	24	5.68728	198.253	0.0227347	0.269535	24	5.69337	168.287	32.0146	0.190238	163.995	189.191	198.111	187.142	152.309	143.337	148.397	163.815
Cyp2a5	0.0937933	0.635814	24	12.2028	156.176	0.0440476	0.413932	24	15	165.048	0.1566	1	24	13.8335	670.546	0.022841	0.27042	24	13.6824	481.836	224.601	0.466136	397.582	186.085	456.67	535.456	714.599	611.76	588.389	364.144
N6amt1	0.039306	0.51547	24	9.59072	0.805922	0.113095	0.577886	24	9	1.00537	0.145609	1	24	8.67232	5.48029	0.0228493	0.27042	24	9.08747	4.66447	0.87311	0.187183	4.21852	5.31523	5.24104	5.35022	5.63005	4.42725	3.345	3.78841
BC029722	0.266945	0.781845	24	13.6029	0.703524	0.0138889	0.278415	24	15	0.797917	0.175501	1	24	14.5524	9.05208	0.022941	0.271083	24	14.3861	7.73046	1.30123	0.168326	7.25379	6.8302	6.66553	7.66383	8.48976	9.62013	7.85109	7.46935
Serpinf2	0.334513	0.788912	24	5.31269	63.5397	0.0138889	0.278415	24	6	105.037	0.140094	1	24	5.53997	706.024	0.0229463	0.271083	24	5.61745	571.956	156.869	0.274267	536.485	686.666	702.918	638.296	517.994	464.362	457.74	571.19
Smim4	0.186022	0.740329	24	12.661	1.63523	0.0138889	0.278415	24	15	0.649189	0.252374	1	24	13.8524	8.1796	0.0229776	0.271083	24	13.838	5.52885	2.52306	0.456344	4.47574	4.13407	4.48848	4.82966	8.28124	8.72136	4.92075	4.37951
Srcin1	0.0147886	0.441005	24	22.5804	0.146862	0.249206	0.801565	24	0	0.156522	0.177003	1	24	7.73643e-05	0.310326	0.0229853	0.271083	24	23.5293	0.202738	0.149231	0.149231	0.321533	0.154065	0.107509	0.144601	0.0595772	0.0998629	0.331736	0.403022
Ddb1	0.0366825	0.510354	24	11.9998	34.6783	0.113095	0.577886	24	13.5	36.1362	0.158703	1	24	12.3454	279.462	0.0231484	0.272479	24	12.6134	233.574	41.7248	0.178636	216.623	205.959	213.915	253.427	278.017	276.354	222.65	201.646
Actn1	0.0387609	0.51547	24	8.94879	6.05527	0.113095	0.577886	24	9	6.69156	0.150242	1	24	8.70302	35.2355	0.0231542	0.272479	24	8.88395	27.0883	6.79983	0.251024	21.6713	26.2424	33.5696	35.3693	31.1291	22.7022	21.9222	24.1007
Elovl1	0.0263078	0.482512	24	23.4746	3.70846	0.113095	0.577886	24	0	3.00038	0.221485	1	24	7.73643e-05	22.8455	0.023164	0.272479	24	23.825	20.3543	3.99301	0.196175	22.9317	20.8244	19.0559	19.6367	16.5327	16.6771	20.8717	26.3039
Cox7a2	0.25867	0.779595	24	12.9241	8.58915	0.0138889	0.278415	24	15	9.17499	0.183795	1	24	14.8417	113.219	0.0231997	0.272662	24	14.262	95.8205	14.7082	0.153497	84.769	84.1707	90.0653	89.9704	106.584	120.035	97.2539	93.7161
Snx4	0.416368	0.788912	24	5.38182	0.932795	0.0138889	0.278415	24	6	2.53584	0.114392	1	24	5.52764	30.6547	0.0232321	0.272806	24	5.63637	28.3401	2.29495	0.0809788	29.6196	29.6575	30.7475	30.3083	27.197	25.9976	25.6266	27.5667
Mest	0.0869533	0.630458	24	23.6565	0.5235	0.0440476	0.413932	24	3	0.643201	0.173327	1	24	0.264802	2.36507	0.0232947	0.273305	24	0.950912	1.68462	0.64368	0.382091	2.26359	2.56775	1.66638	1.53277	0.834081	1.46466	1.10579	2.04198
Gpr180	0.20677	0.759746	24	13.3576	4.22428	0.0138889	0.278415	24	15	4.28029	0.232841	1	24	14.3177	27.4547	0.0234235	0.27426	24	14.2258	20.6838	7.42598	0.359024	20.2309	14.5078	17.2283	20.4176	25.4991	29.8257	20.4847	17.2762
Slu7	0.0318903	0.502588	24	23.1536	3.77594	0.113095	0.577886	24	0	3.57006	0.185452	1	24	7.73643e-05	26.0086	0.0234285	0.27426	24	23.7184	22.3633	3.98991	0.178413	26.5972	22.211	23.7863	20.0127	18.2008	17.9753	24.4102	25.7128
Atp11a	0.0284912	0.49079	24	23.486	13.2913	0.113095	0.577886	24	0	13.3774	0.208104	1	24	7.73643e-05	39.4176	0.0234738	0.27426	24	23.8288	31.1972	14.3201	0.459019	37.0663	42.7016	22.5499	27.7922	17.6051	18.8408	33.45	49.5717
Stk24	0.307807	0.788912	24	7.35531	0.76365	0.0138889	0.278415	24	7.5	1.1887	0.156855	1	24	5.37524	16.0968	0.0234742	0.27426	24	6.75093	14.4913	1.36974	0.0945216	13.9288	15.843	16.5563	14.6047	14.656	13.6146	13.1589	13.5684
Stx7	0.029798	0.496417	24	21.7453	3.05524	0.113095	0.577886	24	22.5	2.22833	0.199017	1	24	20.9999	19.5757	0.0234774	0.27426	24	21.7484	17.2901	3.13311	0.181209	21.4527	16.639	16.7176	12.6381	15.639	17.7423	17.6097	19.8824
Slc24a5	0.0352964	0.507372	24	12.1227	0.140508	0.113095	0.577886	24	13.5	0.13874	0.168231	1	24	12.4258	1.10935	0.0235005	0.274294	24	12.6815	0.938964	0.17162	0.17162	0.900293	0.796001	0.886946	1.0122	1.13197	1.0652	0.939919	0.779177
D930048N14Rik	0.0315953	0.50187	24	22.1525	2.02823	0.113095	0.577886	24	22.5	2.14886	0.188725	1	24	20.2213	6.93447	0.0235755	0.274933	24	21.6322	5.22592	2.078	0.397633	5.7876	6.95859	3.97782	2.34253	3.21717	5.75876	6.9941	6.77078
Tex12	0.0361033	0.508236	24	23.248	0.377396	0.113095	0.577886	24	1.5	0.427042	0.165501	1	24	7.73643e-05	1.60634	0.0236126	0.275129	24	0.245725	1.11266	0.417463	0.375193	1.64625	1.20684	1.31698	0.723003	0.86387	0.69904	0.967563	1.47775
Wdr18	0.0851921	0.625852	24	12.4904	5.04698	0.0440476	0.413932	24	13.5	5.60874	0.180557	1	24	12.5455	44.3839	0.02366	0.275135	24	12.8445	37.4235	6.40767	0.17122	35.7931	31.9684	33.0589	39.5627	46.0234	41.7427	38.6749	32.5642
Slc25a35	0.0153727	0.441005	24	23.0268	0.250061	0.249206	0.801565	24	0	0.268233	0.176931	1	24	7.73643e-05	0.657338	0.0236675	0.275135	24	23.6764	0.503303	0.262117	0.262117	0.604482	0.718969	0.37628	0.260281	0.357463	0.266301	0.663472	0.779177
Fpgt	0.0166209	0.445928	24	21.9145	3.16075	0.249206	0.801565	24	0	2.54146	0.163704	1	24	20.9999	22.3889	0.023674	0.275135	24	22.2945	19.4656	3.15104	0.161877	23.6134	19.0783	17.1476	17.5834	15.788	20.0392	19.9595	22.5155
Tbc1d10a	0.0368518	0.511302	24	9.28979	2.8627	0.113095	0.577886	24	9	2.56826	0.162882	1	24	8.64092	12.3814	0.0236949	0.275141	24	8.97693	8.79179	3.1632	0.35979	6.61072	7.31807	12.5785	12.4356	9.80046	8.55492	5.91596	7.12006
Acox3	0.0672745	0.583148	24	9.51604	5.67112	0.0440476	0.413932	24	10.5	3.9086	0.230292	1	24	8.9685	37.6625	0.0237898	0.275872	24	9.66054	29.924	5.84781	0.195422	25.6455	27.9371	32.2257	41.7028	31.3078	28.2279	26.0413	26.3039
Cept1	0.0613489	0.568242	24	21.3799	6.07747	0.0440476	0.413932	24	22.5	4.43035	0.252657	1	24	20.9999	60.2178	0.0237985	0.275872	24	21.6251	56.0438	6.27537	0.111973	66.1458	51.5603	54.2112	49.3955	51.0577	57.5543	58.0262	60.3996
Slx4ip	0.024687	0.482512	24	21.1845	1.16558	0.113095	0.577886	24	22.5	1.08244	0.24485	1	24	18.5187	4.77213	0.0238216	0.275903	24	20.756	4.33274	1.32585	0.306008	6.13485	4.54491	3.35964	3.32581	3.42569	4.12767	5.39071	4.35264
Zfp329	0.0283723	0.49079	24	20.9425	2.74867	0.113095	0.577886	24	21	2.62651	0.214024	1	24	17.9275	10.8593	0.0239049	0.276631	24	19.9818	9.37575	3.52142	0.375588	13.2729	9.62905	6.77304	6.56486	7.17906	10.419	11.3343	9.83375
Zfp563	0.0199488	0.453111	24	21.6691	0.535426	0.113095	0.577886	24	0	0.499282	0.305263	1	24	17.7191	3.44717	0.0239567	0.276832	24	21.2022	3.4377	0.572806	0.166625	4.32141	4.00568	3.33277	2.60281	3.1278	3.29548	3.51087	3.30478
Dlg1	0.35163	0.788912	24	6.25494	5.60157	0.0138889	0.278415	24	6	10.9521	0.14107	1	24	5.89929	69.1351	0.0239631	0.276832	24	6.05139	56.6674	12.3977	0.21878	54.4549	66.6843	67.1929	67.0368	52.2194	43.7067	50.6727	51.3719
Atad2b	0.0787603	0.615867	24	23.2914	2.22498	0.0440476	0.413932	24	3	2.46381	0.199286	1	24	7.73643e-05	24.1594	0.024027	0.277334	24	0.73307	20.7093	2.57925	0.124546	23.6391	24.2395	19.0559	21.0249	17.9923	17.9753	19.8765	21.8707
Stat5a	0.016359	0.445928	24	22.5463	3.57618	0.249206	0.801565	24	0	3.70186	0.16993	1	24	20.9999	18.8159	0.0240641	0.277526	24	22.5162	15.1598	3.57612	0.235895	16.784	18.5905	11.9335	12.4935	11.0218	14.9461	16.8356	18.6734
Nuak1	0.0163087	0.445928	24	22.9956	0.916857	0.249206	0.801565	24	0	0.963219	0.171257	1	24	1.31042	4.15993	0.0241504	0.27811	24	0.100421	3.64697	0.984774	0.270025	3.94843	4.51923	3.57466	2.57389	2.71076	3.12904	4.34021	4.37951
Abtb2	0.0272631	0.487452	24	22.897	10.7806	0.113095	0.577886	24	22.5	11.7333	0.225929	1	24	0.869247	25.7887	0.0241658	0.27811	24	23.4139	22.7023	11.0869	0.488361	23.369	30.7102	18.3302	10.1799	14.4177	15.046	35.5234	34.042
Anxa7	0.0173311	0.449912	24	11.3504	23.5775	0.249206	0.801565	24	12	25.6082	0.161439	1	24	11.9633	108.222	0.0241829	0.27811	24	11.7714	81.1108	25.1829	0.310476	68.9238	61.6002	84.5286	94.7712	106.822	107.286	64.7162	60.2384
Glt28d2	0.0150801	0.441005	24	21.9063	1.06108	0.249206	0.801565	24	0	1.1257	0.185677	1	24	19.6049	4.80809	0.0241969	0.27811	24	21.8412	4.36328	1.08165	0.247898	5.36317	5.41794	3.60154	3.21013	3.30654	4.32739	5.03133	4.64819
Pah	0.09096	0.635033	24	12.3739	145.58	0.0440476	0.413932	24	15	153.785	0.174586	1	24	14.1892	1413.6	0.0242419	0.278189	24	13.8611	1227.54	219.452	0.178774	1161	1018.11	1185.39	1304.73	1333.9	1483.1	1244.15	1089.93
Tubgcp4	0.0318962	0.502588	24	21.7035	2.68842	0.113095	0.577886	24	0	2.29557	0.19394	1	24	20.9999	26.8389	0.0242448	0.278189	24	22.2207	24.8655	2.6731	0.107503	28.2178	24.6247	22.7649	23.5988	20.9712	25.6648	26.4283	26.6532
Rngtt	0.0264788	0.482512	24	21.788	1.25772	0.113095	0.577886	24	0	1.16332	0.234121	1	24	20.9999	13.3702	0.0242845	0.278408	24	22.2502	12.7681	1.252	0.0980572	14.469	13.6604	11.9603	10.845	12.5112	12.5494	12.6613	13.4878
Rp9	0.0311559	0.499907	24	10.1318	1.47624	0.113095	0.577886	24	10.5	1.42689	0.200271	1	24	9.15109	20.4481	0.0244048	0.279109	24	9.92867	18.5226	1.49575	0.0807528	17.6586	16.8701	19.6741	20.62	19.5115	18.4413	17.9137	17.4912
Smarcal1	0.0340409	0.504733	24	23.1328	1.53089	0.113095	0.577886	24	0	1.25963	0.183345	1	24	1.12358	13.4547	0.0244096	0.279109	24	0.0844759	12.1951	1.65884	0.136025	13.3115	13.4036	13.0085	9.97743	10.4856	11.917	11.9425	13.5147
Sult1a1	0.0327716	0.504601	24	22.1144	16.4736	0.113095	0.577886	24	21	22.1842	0.190557	1	24	20.9999	195.7	0.0244203	0.279109	24	21.3703	163.548	17.107	0.1046	161.937	144.847	159.677	138.383	148.556	170.832	189.974	194.176
Rab32	0.0309894	0.499907	24	22.6444	6.35275	0.113095	0.577886	24	0	4.20193	0.201598	1	24	20.9999	33.2198	0.0244279	0.279109	24	22.5507	27.75	6.35156	0.228886	32.552	29.7088	30.2368	17.5545	21.2691	28.0948	28.9716	33.6121
Zfp651	0.0301619	0.496628	24	10.3382	0.199271	0.113095	0.577886	24	12	0.175021	0.20747	1	24	9.42546	1.03812	0.0244585	0.27913	24	10.583	0.830425	0.198923	0.198923	0.630205	0.667614	0.886946	1.1568	0.86387	0.965341	0.774051	0.698572
Apbb1	0.0314299	0.50187	24	11.7075	0.212775	0.113095	0.577886	24	12	0.18729	0.199234	1	24	12.124	1.01789	0.024471	0.27913	24	11.9439	0.758024	0.233009	0.233009	0.630205	0.718969	0.618174	0.925443	1.0426	0.898766	0.746406	0.483627
Slco1a4	0.0155834	0.441005	24	10.24	13.5006	0.249206	0.801565	24	12	14.8789	0.183258	1	24	9.18276	74.2461	0.0245627	0.27917	24	10.4688	60.6552	13.477	0.22219	43.9729	48.0939	73.4821	70.9699	71.2246	63.2798	64.1633	50.0554
Pnrc2	0.0269754	0.484806	24	21.9632	6.61266	0.113095	0.577886	24	1.5	5.1421	0.233597	1	24	20.0522	38.0023	0.0245884	0.27917	24	22.4529	35.9171	6.55905	0.182616	45.0275	38.9527	35.6391	27.7633	27.3757	38.7468	35.3299	38.5021
Rrbp1	0.370753	0.788912	24	2.57267	22.2061	0.0138889	0.278415	24	4.5	40.837	0.138398	1	24	4.50536	274.653	0.0245884	0.27917	24	3.86556	227.161	57.0041	0.250942	244.044	274.441	267.347	248.25	190.737	161.412	214.606	216.45
Oasl1	0.037373	0.512574	24	0.0430827	3.59404	0.113095	0.577886	24	3	3.54453	0.168824	1	24	2.39195	12.2299	0.0246124	0.27917	24	1.82621	9.77428	5.18022	0.529985	11.0607	13.6347	10.6434	7.08542	6.7918	5.19287	9.81386	13.9714
Gin1	0.11158	0.664349	24	13.0181	0.906174	0.0440476	0.413932	24	15	1.15478	0.145216	1	24	14.1824	8.96652	0.0246161	0.27917	24	14.0681	7.62756	1.50492	0.197301	7.27951	6.47072	6.77304	7.86627	8.72807	9.08752	8.0446	6.77078
Tor2a	0.06955	0.590006	24	10.9306	2.84384	0.0440476	0.413932	24	13.5	2.05694	0.233112	1	24	12.2579	25.5744	0.0246274	0.27917	24	12.2301	22.1337	3.06222	0.138351	18.6232	19.3094	23.3025	22.0371	26.3927	25.7313	20.1253	21.5483
Rnf19b	0.0168066	0.445928	24	9.7236	5.30491	0.249206	0.801565	24	12	5.50698	0.170607	1	24	9.05057	29.5925	0.0246383	0.27917	24	10.2447	23.2472	5.27092	0.226734	18.4174	18.8729	28.6242	29.8166	26.0055	23.6675	20.1806	20.3929
Zfp788	0.0164979	0.445928	24	22.4462	0.199617	0.249206	0.801565	24	0	0.179217	0.173809	1	24	20.9999	3.5743	0.0246393	0.27917	24	22.4811	3.44912	0.199611	0.0578731	3.63976	3.6462	3.38652	3.18121	3.27675	3.46191	3.40029	3.60033
Il12rb1	0.0425207	0.525501	24	12.0961	0.764486	0.113095	0.577886	24	15	0.833601	0.148779	1	24	12.4168	2.23688	0.024662	0.279193	24	13.1532	1.21415	1.00252	0.825694	0.835986	0.487872	0.725683	1.67737	2.17457	2.19698	1.0505	0.564231
Ccdc173	0.035712	0.507372	24	23.1793	0.13626	0.113095	0.577886	24	3	0.12895	0.177363	1	24	7.73643e-05	0.455873	0.0246852	0.279223	24	0.695109	0.332204	0.155562	0.155562	0.424424	0.513549	0.295649	0.231361	0.20852	0.166438	0.41467	0.403022
Chmp1a	0.0315596	0.50187	24	10.5908	6.94776	0.113095	0.577886	24	12	6.18349	0.200929	1	24	11.852	51.3072	0.0247066	0.279232	24	11.4829	43.4534	7.05632	0.162388	36.0889	40.3906	46.6318	44.6816	54.394	47.9675	37.735	39.738
A230050P20Rik	0.0140166	0.438527	24	23.4828	16.5522	0.249206	0.801565	24	0	15.1577	0.206174	1	24	1.03969	49.2588	0.0247854	0.279889	24	0.172966	43.1993	18.4398	0.426855	45.9921	55.4376	40.0469	26.057	32.4696	29.5594	48.3505	67.6809
Aqp1	0.0338913	0.504682	24	11.0293	15.9225	0.113095	0.577886	24	12	17.7275	0.189428	1	24	11.9775	122.745	0.0249396	0.280899	24	11.6697	101.587	16.6855	0.164248	85.9908	97.8825	92.9681	116.779	119.869	117.838	89.1264	92.2384
Tmem80	0.0555375	0.554593	24	22.8555	0.663744	0.0440476	0.413932	24	21	0.396201	0.296856	1	24	20.9999	5.5255	0.024943	0.280899	24	21.613	4.41083	0.65137	0.147675	4.28282	4.87872	3.81655	3.55717	4.25977	3.89465	5.16955	5.42737
Chic1	0.0430515	0.52663	24	23.8953	3.2606	0.113095	0.577886	24	3	3.22937	0.149251	1	24	2.62714	10.2905	0.024956	0.280899	24	1.8621	7.40881	4.62518	0.624282	8.87432	11.94	8.22441	5.43698	3.45548	3.42863	8.23811	9.67254
Cpt1a	0.0311637	0.499907	24	10.2007	93.9665	0.113095	0.577886	24	12	55.1244	0.206205	1	24	9.60643	396.696	0.0249577	0.280899	24	10.5958	276.704	93.5024	0.337916	200.714	219.594	274.926	415.379	394.431	240.27	243.024	225.289
Nr1d1	0.275245	0.7863	24	7.48644	11.9533	0.0138889	0.278415	24	7.5	14.651	0.190562	1	24	5.99427	39.012	0.0250029	0.281033	24	6.99646	14.2678	20.0901	1.40808	1.89061	27.4492	46.3631	21.2274	9.6813	4.62698	1.02285	1.88077
Txnrd2	0.0823988	0.623898	24	9.5749	2.64	0.0440476	0.413932	24	9	3.4365	0.200802	1	24	7.36045	22.5528	0.0250111	0.281033	24	8.65007	19.8969	2.98363	0.149954	17.6715	21.3893	23.6519	20.3598	23.5032	18.5745	17.582	16.4433
Slco4a1	0.0324746	0.504601	24	10.3491	0.0898118	0.113095	0.577886	24	10.5	0.096883	0.199723	1	24	6.52099	0.223336	0.0251342	0.281933	24	9.17827	0.148032	0.092549	0.092549	0.0643066	0.154065	0.241894	0.202441	0.178732	0.233013	0.082934	0.0268682
Arid4a	0.0876935	0.631757	24	23.5529	2.93964	0.0440476	0.413932	24	1.5	2.75968	0.190031	1	24	7.73643e-05	29.973	0.0251474	0.281933	24	0.347259	25.7026	3.34689	0.130216	30.0569	28.0398	25.3183	26.9825	21.0903	21.2375	25.5437	27.3518
Zfp182	0.0401274	0.519077	24	23.5104	0.819001	0.113095	0.577886	24	1.5	0.855357	0.161798	1	24	2.22397	7.26798	0.0251537	0.281933	24	1.08707	6.50128	1.00755	0.154976	6.97084	7.54917	6.96118	5.40806	5.65984	5.9252	6.4965	7.03946
Zfp109	0.061954	0.568498	24	22.7262	0.649	0.0440476	0.413932	24	21	0.362018	0.269902	1	24	7.73643e-05	3.9377	0.0252127	0.282315	24	22.5795	3.45646	0.648703	0.187678	3.90984	3.54349	3.4134	2.45821	3.42569	2.72959	3.95319	4.2183
Zkscan2	0.277052	0.787635	24	8.34388	0.0577035	0.0138889	0.278415	24	7.5	0.0800452	0.191578	1	24	5.73841	0.282645	0.0252293	0.282315	24	7.20013	0.191067	0.0883601	0.0883601	0.180059	0.256775	0.322526	0.202441	0.238309	0.166438	0.0276447	0.134341
Bnip3	0.0908948	0.634905	24	12.4728	60.8276	0.0440476	0.413932	24	15	57.9958	0.184543	1	24	14.1026	219.935	0.0252729	0.282568	24	13.863	137.966	92.6685	0.671679	111.559	65.2207	115.625	156.545	193.894	248.359	134.685	77.837
Sox9	0.032448	0.504601	24	22.6089	2.44656	0.113095	0.577886	24	0	2.49851	0.202843	1	24	20.9999	6.01786	0.0254162	0.283937	24	22.5382	4.76187	2.4463	0.513727	7.00942	8.57627	2.84898	2.86309	2.23415	3.92794	4.61666	6.01847
Etnk1	0.0397128	0.515635	24	21.4094	15.7782	0.113095	0.577886	24	21	17.0141	0.166088	1	24	18.4607	136.928	0.0254572	0.28416	24	20.3074	122.921	18.7147	0.15225	136.124	119.785	117.588	100.382	106.196	131.386	140.656	131.251
Ak4	0.0368673	0.511302	24	11.9174	27.4159	0.113095	0.577886	24	13.5	25.1353	0.179344	1	24	12.0683	113.795	0.0255044	0.284226	24	12.4924	78.9758	32.3251	0.409304	72.9752	48.5047	68.5636	99.167	115.848	102.825	71.0192	52.9034
Sin3b	0.101431	0.653897	24	11.9979	2.41111	0.0440476	0.413932	24	15	2.34177	0.167402	1	24	13.1971	33.6589	0.025508	0.284226	24	13.393	30.0716	3.24954	0.10806	27.3946	27.6289	28.5973	30.5396	32.976	34.9853	29.1651	29.2863
Mypop	0.0487909	0.535749	24	20.735	0.794802	0.113095	0.577886	24	21	0.882136	0.135671	1	24	18.3214	2.39746	0.0255265	0.284226	24	20.033	1.69302	1.02226	0.603807	2.5594	1.28387	0.9407	0.520562	1.48943	2.03055	2.54331	2.17632
Rasgrp3	0.0338808	0.504682	24	23.8735	1.90668	0.113095	0.577886	24	0	1.82	0.195582	1	24	2.88984	11.4127	0.025547	0.284226	24	0.898286	10.2415	2.3704	0.23145	10.6492	12.2481	10.2402	9.48579	7.5961	8.48835	10.892	12.3325
Nmrk1	0.0392994	0.51547	24	11.5352	13.0928	0.113095	0.577886	24	13.5	13.0829	0.168878	1	24	11.9317	44.6219	0.0255773	0.284329	24	12.3181	26.9585	14.8458	0.550693	20.3852	12.7874	18.9215	40.6038	46.2915	34.1198	23.885	18.6734
Tfpi2	0.0657517	0.578024	24	22.6414	12.8081	0.0440476	0.413932	24	1.5	8.56203	0.259526	1	24	0.504393	62.077	0.0256044	0.284398	24	0.222183	50.6759	13.3789	0.264009	61.58	59.6487	57.8396	28.8623	35.3293	53.0272	51.0044	58.1158
Eps15l1	0.415908	0.788912	24	5.29398	0.430131	0.0138889	0.278415	24	6	0.845354	0.130706	1	24	5.11603	13.3381	0.0256918	0.285135	24	5.46963	12.2726	1.0998	0.0896139	12.1925	13.4807	13.0892	12.8984	11.8857	11.1181	11.7213	11.7951
Cdk5	0.0171703	0.447452	24	10.9042	1.47878	0.249206	0.801565	24	10.5	1.61719	0.176702	1	24	11.5442	14.4249	0.0257197	0.285211	24	10.9825	12.8339	1.49389	0.116402	12.1282	11.786	13.2504	14.3444	13.9113	14.2804	11.4172	11.5533
Ppp2r3a	0.321121	0.788912	24	1.05449	2.25677	0.0138889	0.278415	24	3	3.5263	0.170183	1	24	2.79621	31.0469	0.0257951	0.285585	24	2.28883	26.8326	3.93144	0.146517	30.2884	31.2495	29.9411	27.7633	23.6522	19.6397	26.8706	25.2561
Egln1	0.0672084	0.583061	24	22.0525	1.78731	0.0440476	0.413932	24	22.5	1.10894	0.256401	1	24	19.9092	19.9116	0.0257956	0.285585	24	21.4979	18.5964	1.8494	0.0994495	20.0122	18.7189	19.1365	15.1252	17.1285	19.1404	19.6001	19.9093
Mat2b	0.017121	0.447025	24	10.1705	3.62069	0.249206	0.801565	24	12	3.69409	0.178668	1	24	11.2572	30.198	0.02588	0.286152	24	11.1437	27.3025	3.56911	0.130725	22.4687	26.1396	30.7475	28.3706	30.7121	29.859	25.3502	24.7724
Vdac1	0.0943565	0.636751	24	12.6031	15.6876	0.0440476	0.413932	24	15	15.2034	0.183905	1	24	14.3558	155.906	0.0259323	0.286152	24	13.9924	133.282	24.7685	0.185836	125.912	116.422	128.311	131.818	153.382	159.082	135.044	116.285
Dstyk	0.0257635	0.482512	24	22.9428	1.54386	0.113095	0.577886	24	22.5	1.67557	0.262335	1	24	2.08889	17.4889	0.025933	0.286152	24	23.8107	17.527	1.62371	0.0926404	17.0798	18.231	16.5832	16.1953	15.788	16.8768	19.8212	19.6406
Zbtb10	0.380474	0.788912	24	6.77967	1.20889	0.0138889	0.278415	24	6	2.3604	0.144711	1	24	5.68282	8.88299	0.0259416	0.286152	24	6.15364	6.05183	2.56973	0.42462	5.98052	8.26814	9.11135	7.60599	5.89815	2.59644	5.03133	3.92275
Tspan12	0.0163484	0.445928	24	11.6553	20.694	0.249206	0.801565	24	12	20.7557	0.187801	1	24	11.9614	166.33	0.0259524	0.286152	24	11.8723	141.253	22.4666	0.159052	136.073	128.362	135.864	157.933	165.208	159.847	129.543	117.199
Cdkl1	0.0662916	0.580308	24	9.89996	0.191592	0.0440476	0.413932	24	10.5	0.164023	0.264034	1	24	9.01457	0.540632	0.0261028	0.287577	24	9.80545	0.281387	0.195695	0.195695	0.115752	0.154065	0.37628	0.636242	0.357463	0.199726	0.304091	0.107473
Usp2	0.0372263	0.512064	24	11.3044	15.5989	0.113095	0.577886	24	13.5	13.8277	0.183552	1	24	11.7506	35.9277	0.0261491	0.287852	24	12.1791	15.3749	17.2199	1.12	7.03515	0.950066	5.77859	35.2247	36.3421	21.8367	10.7538	5.07808
Cwc27	0.103619	0.657012	24	23.7068	1.00039	0.0440476	0.413932	24	3	1.11037	0.169979	1	24	7.73643e-05	7.38905	0.026227	0.288196	24	0.8749	5.81555	1.22403	0.210475	7.35668	7.0613	6.5849	5.14778	5.06407	3.56178	5.97125	5.77665
Alkbh6	0.0361966	0.508653	24	10.8842	0.438398	0.113095	0.577886	24	13.5	0.571302	0.189567	1	24	12.0114	6.7852	0.0262324	0.288196	24	12.1294	6.17966	0.467339	0.0756253	5.53037	5.57201	5.80546	6.79622	6.70244	6.52438	6.19241	6.31402
Spire1	0.0286122	0.49079	24	23.5208	0.2528	0.113095	0.577886	24	0	0.12647	0.239958	1	24	5.51049e-05	0.946056	0.0262441	0.288196	24	23.8404	0.844323	0.272885	0.272885	0.938877	0.950066	0.779437	0.780843	0.446829	0.765616	0.856985	1.23594
Baiap2l1	0.372435	0.788912	24	14.8276	2.63707	0.0138889	0.278415	24	16.5	4.61745	0.15053	1	24	15.6723	30.6669	0.0262997	0.288287	24	15.6667	24.208	6.77043	0.279677	22.0958	19.027	21.6899	21.343	26.5417	30.558	30.2156	22.1931
Tor1b	0.118888	0.678138	24	12.7967	9.26971	0.0440476	0.413932	24	15	11.313	0.148702	1	24	13.321	59.4142	0.0263013	0.288287	24	13.7006	46.0259	14.0638	0.305563	41.6193	33.4577	35.8272	51.8537	55.4664	62.4143	48.0188	39.5499
Msn	0.057376	0.560213	24	0.0814104	3.17083	0.0440476	0.413932	24	1.5	2.55877	0.308353	1	24	2.94375	21.0704	0.0263162	0.288287	24	1.50818	19.6966	4.38372	0.222561	20.0637	21.9799	19.6472	18.3353	15.4901	18.3082	18.439	25.3098
Ccdc151	0.182601	0.734735	24	21.18	0.358216	0.0138889	0.278415	24	21	0.251009	0.308118	1	24	18.4977	2.10343	0.0263708	0.288442	24	20.2411	1.75778	0.435472	0.247741	1.99351	1.72039	1.61263	0.838683	1.84689	1.96397	1.99042	2.09572
Elac1	0.317629	0.788912	24	1.49258	1.11318	0.0138889	0.278415	24	4.5	1.47404	0.177152	1	24	3.57715	9.66304	0.0263729	0.288442	24	3.20016	7.7605	2.37796	0.306418	8.46275	10.2967	9.11135	7.72167	6.70244	4.52712	7.68522	7.57682
Acy3	0.0179669	0.451707	24	10.2416	6.11138	0.249206	0.801565	24	9	6.79231	0.175546	1	24	9.08716	42.411	0.0264878	0.289397	24	9.44148	34.6141	6.28366	0.181535	36.076	33.6118	40.0469	41.0955	42.2403	31.9894	25.7372	26.1158
Ifrd1	0.0384012	0.51547	24	9.94815	3.76045	0.113095	0.577886	24	9	3.18111	0.181118	1	24	9.07468	21.3505	0.026503	0.289397	24	9.34031	16.1333	3.94207	0.244344	15.5365	13.7118	18.7602	22.4131	18.6477	15.2124	11.9149	12.8698
Atg10	0.0285527	0.49079	24	10.693	0.603975	0.113095	0.577886	24	9	0.635301	0.24446	1	24	9.21611	3.58577	0.0265747	0.289946	24	9.63311	2.87567	0.600647	0.208872	2.95811	2.90155	3.25213	3.38365	3.81294	2.46328	2.46038	1.7733
Elmod3	0.0916156	0.635516	24	20.9144	2.48717	0.0440476	0.413932	24	19.5	2.91243	0.197024	1	24	20.3532	13.7135	0.0267194	0.29097	24	20.2564	11.5559	3.06187	0.264961	14.6491	9.73176	8.89634	8.93631	11.1707	10.7186	15.2599	13.0848
Zfp108	0.0391194	0.51547	24	21.9775	0.434705	0.113095	0.577886	24	21	0.450154	0.179888	1	24	20.9999	3.07315	0.0267394	0.29097	24	21.325	2.51802	0.455537	0.180911	2.70088	2.46504	2.06954	2.31361	1.93626	2.49657	3.20678	2.9555
Fer	0.377703	0.788912	24	4.52127	1.13034	0.0138889	0.278415	24	4.5	1.68903	0.151748	1	24	5.36331	13.8682	0.0267441	0.29097	24	4.79434	11.7758	3.18915	0.270821	11.6781	13.8145	13.7073	12.9562	11.3793	8.65478	9.97973	12.0369
2410015M20Rik	0.250178	0.777332	24	13.0878	5.99105	0.0138889	0.278415	24	15	5.61342	0.229216	1	24	14.2476	50.1713	0.0267544	0.29097	24	14.1133	39.6925	10.095	0.254329	35.8188	32.5847	33.6233	38.7819	46.5298	55.3573	37.9008	36.9437
Pianp	0.415702	0.788912	24	18.3456	0.029255	0.0138889	0.278415	24	18	0.0608218	0.138258	1	24	16.9045	0.166614	0.0268001	0.291234	24	17.7515	0.0905936	0.0693054	0.0693054	0.0643066	0.0513549	0.0268771	0.0289201	0.119154	0.133151	0.193513	0.107473
Plek	0.0457168	0.532927	24	23.5752	1.83829	0.0440476	0.413932	24	0	0.874884	0.398156	1	24	7.73643e-05	5.48812	0.0268897	0.291809	24	23.8585	5.32318	1.99017	0.373868	5.64612	4.41652	4.81101	4.25125	3.81294	4.39397	5.47364	9.78001
Spats2	0.0696022	0.590006	24	22.6129	0.625233	0.0440476	0.413932	24	1.5	0.33037	0.261603	1	24	7.73643e-05	6.55994	0.0268961	0.291809	24	0.0367318	5.54522	0.646781	0.116638	6.66217	5.70039	5.53669	5.49482	4.34914	5.42588	5.33542	5.85726
Otub1	0.0405656	0.521047	24	11.7779	4.59107	0.113095	0.577886	24	12	4.477	0.175614	1	24	12.9317	34.1927	0.0269889	0.292581	24	12.2357	28.6841	5.21101	0.181669	25.6583	25.2409	28.0866	30.6264	33.0654	35.8841	26.6495	24.2619
Gsap	0.434835	0.788912	24	4.58592	5.07608	0.0138889	0.278415	24	6	9.75398	0.13359	1	24	4.48358	56.706	0.0270174	0.292656	24	5.0205	43.5752	13.9442	0.320003	42.2237	60.9583	53.5393	46.6481	38.5465	34.0865	32.5654	40.0336
Scaf11	0.471547	0.788912	24	4.45124	2.87129	0.0138889	0.278415	24	6	7.13161	0.123777	1	24	4.87771	79.1505	0.0271148	0.293357	24	5.10808	71.7075	7.72902	0.107785	76.5892	77.3662	79.5026	76.5226	69.4075	60.0509	66.5131	67.7078
AI661453	0.0824296	0.623898	24	23.4593	2.56431	0.0440476	0.413932	24	0	2.48803	0.223383	1	24	2.75494	13.2901	0.0271254	0.293357	24	0.715109	10.7363	3.01584	0.280901	11.6138	15.2781	11.2078	8.09763	7.08969	9.4204	11.3343	11.8489
Nfatc3	0.0451475	0.530695	24	23.4213	3.53656	0.113095	0.577886	24	3	3.06402	0.159301	1	24	7.73643e-05	31.5311	0.0271842	0.293758	24	0.777218	27.3639	4.17126	0.152437	30.9186	32.1738	26.474	26.7222	23.116	22.2029	28.474	28.8295
Srsf1	0.0167634	0.445928	24	22.2549	15.0077	0.249206	0.801565	24	0	15.0437	0.195516	1	24	7.73643e-05	121.354	0.0272699	0.294442	24	23.4229	99.921	14.865	0.148767	121.771	105.791	100.762	83.5212	88.6211	85.3495	111.076	102.475
Tspo	0.11133	0.66419	24	12.0071	6.3718	0.0440476	0.413932	24	15	6.77285	0.166728	1	24	13.1935	41.2946	0.0272909	0.294442	24	13.3947	31.2116	8.5975	0.275459	22.7388	26.1396	26.1246	30.9445	41.2274	43.2739	29.6351	29.6087
Uqcc3	0.0678996	0.586056	24	10.8403	1.11218	0.0440476	0.413932	24	12	1.19826	0.274586	1	24	11.9956	11.5779	0.0273825	0.295195	24	11.6133	10.4662	1.1513	0.110002	9.3116	10.5534	10.8046	11.0764	11.1112	12.15	9.39919	9.32325
H2afy	0.0191005	0.453111	24	10.3643	3.04727	0.249206	0.801565	24	12	3.12189	0.172722	1	24	11.6241	56.4042	0.0274056	0.295209	24	11.3317	53.354	3.04239	0.0570228	50.4164	53.0239	55.3938	54.2252	57.492	54.858	50.5345	50.8883
Arhgap4	0.0479363	0.534374	24	0.347887	1.0642	0.113095	0.577886	24	1.5	1.21481	0.152013	1	24	3.06136	6.51057	0.0274553	0.295509	24	1.63346	5.6434	1.54033	0.272943	6.16058	6.57343	6.28925	5.1767	4.22998	4.56041	5.22484	6.93198
Kynu	0.0408108	0.523204	24	23.4293	25.0287	0.113095	0.577886	24	0	25.4493	0.179746	1	24	2.23095	164.4	0.0275938	0.296765	24	0.541026	143.848	28.8405	0.200493	153.371	180.41	146.05	118.572	116.027	122.898	154.285	159.167
Bbox1	0.0343391	0.506343	24	11.7719	30.8706	0.113095	0.577886	24	12	29.1601	0.214709	1	24	12.0268	165.695	0.0277	0.297631	24	11.9329	125.975	33.7935	0.268256	119.34	101.606	119.415	142.258	169.646	155.653	105.464	94.4147
Prkaa2	0.0433101	0.52663	24	11.9131	20.2267	0.113095	0.577886	24	13.5	22.3878	0.170384	1	24	12.0887	131	0.0277183	0.297631	24	12.4978	104.358	23.8618	0.228653	96.2928	85.1464	89.9041	121.898	134.406	117.206	104.359	85.6557
Anxa9	0.284417	0.788912	24	8.57474	0.108591	0.0138889	0.278415	24	7.5	0.122001	0.211595	1	24	6.08362	1.08051	0.0277505	0.297741	24	7.38819	0.869077	0.157657	0.157657	0.887432	0.873033	1.20947	0.954363	0.834081	0.832191	0.663472	0.698572
H2afv	0.105118	0.659033	24	12.0477	2.24235	0.0440476	0.413932	24	15	2.09232	0.180854	1	24	14.3997	19.2305	0.0277892	0.29792	24	13.8304	16.0289	3.2358	0.201872	14.0574	12.9158	16.2876	15.5301	18.9456	20.0392	15.8128	14.6431
Gpalpp1	0.019445	0.453111	24	10.2591	1.88374	0.249206	0.801565	24	9	1.60213	0.173178	1	24	9.00829	25.5546	0.0278342	0.298167	24	9.42078	23.5308	1.93643	0.0822937	23.3948	22.8016	25.9633	24.987	25.0522	24.0004	20.9823	21.0646
Hnrnpf	0.0289504	0.493594	24	22.2752	3.94371	0.113095	0.577886	24	3	3.15449	0.257017	1	24	7.73643e-05	89.1763	0.0278925	0.298556	24	0.395327	79.8666	3.93112	0.0492211	89.1419	82.9125	77.4868	79.0965	76.527	75.7294	77.488	80.5507
Sharpin	0.0263508	0.482512	24	11.2762	2.24785	0.113095	0.577886	24	10.5	2.02542	0.282858	1	24	11.5257	24.5511	0.0279288	0.298708	24	11.1011	21.829	2.28195	0.104538	22.1858	21.0555	21.5555	24.6688	24.0096	23.1349	19.2407	18.7808
Rabac1	0.291029	0.788912	24	13.1344	5.99493	0.0138889	0.278415	24	15	5.7595	0.20928	1	24	14.7491	43.8275	0.028003	0.299057	24	14.2988	31.7227	10.536	0.332127	25.4654	23.9057	27.0922	26.9246	40.3636	48.3669	31.5979	30.0655
Chrm3	0.0479735	0.534374	24	0.0974444	0.488004	0.113095	0.577886	24	1.5	0.517229	0.155933	1	24	2.63418	1.99672	0.0280056	0.299057	24	1.41223	1.6018	0.665984	0.415773	1.94206	1.87445	2.01579	1.33032	0.953236	0.998629	1.63104	2.06885
Il20rb	0.49115	0.788912	24	4.51363	0.0662876	0.0138889	0.278415	24	4.5	0.230213	0.124203	1	24	3.89364	0.939689	0.0280364	0.29915	24	4.30262	0.689857	0.188346	0.188346	0.810264	0.950066	0.9407	0.723003	0.625561	0.432739	0.552893	0.483627
Akr1c12	0.0404983	0.520676	24	11.4896	9.18079	0.113095	0.577886	24	13.5	8.25446	0.185243	1	24	11.9208	64.7747	0.028066	0.299228	24	12.2991	53.5038	10.3632	0.193691	50.1206	41.2637	54.1575	59.1994	65.7435	61.8817	48.2952	47.3686
Aprt	0.0912265	0.635516	24	11.461	3.36881	0.0440476	0.413932	24	15	3.29151	0.211361	1	24	12.2216	22.2701	0.0280878	0.299228	24	12.8696	17.4699	4.02744	0.230536	14.4175	13.1725	16.8251	18.5667	22.2521	22.7022	14.7346	17.0881
Socs5	0.0381896	0.51547	24	22.1536	1.20553	0.113095	0.577886	24	22.5	0.982008	0.197119	1	24	20.9999	8.6913	0.0281391	0.299471	24	21.8862	7.21476	1.22294	0.169505	7.93544	7.36943	6.53115	5.58158	6.07688	8.08889	7.18761	8.9471
Rpl27	0.25847	0.779595	24	13.0655	9.21009	0.0138889	0.278415	24	15	7.08013	0.237334	1	24	14.3421	88.6713	0.0281548	0.299471	24	14.1381	71.9385	15.5742	0.216493	64.6539	63.1409	62.5431	68.3382	84.3018	95.7019	69.4158	67.4122
Gem	0.0300867	0.496595	24	23.3709	0.606391	0.113095	0.577886	24	22.5	0.486932	0.250921	1	24	7.73643e-05	2.56308	0.0281998	0.299574	24	23.2908	2.27522	0.623389	0.273991	2.43079	2.74749	1.82765	1.85089	1.87668	1.89739	2.23922	3.33165
Klhdc8a	0.0350671	0.507372	24	22.7084	1.02302	0.113095	0.577886	24	22.5	0.942133	0.215373	1	24	20.9999	3.32833	0.0282087	0.299574	24	22.0729	2.38659	1.01713	0.426185	2.62371	3.54349	2.04266	0.838683	1.5788	2.23027	2.93033	3.30478
Gucy1a3	0.112833	0.667395	24	0.170135	1.27114	0.0440476	0.413932	24	1.5	1.62544	0.172138	1	24	3.02646	9.87153	0.0282431	0.299705	24	1.56395	8.3613	1.78846	0.213898	9.51738	9.39795	10.2402	7.23003	6.58328	6.62424	8.40398	8.89336
Apol11b	0.0390385	0.51547	24	21.4254	0.168168	0.113095	0.577886	24	0	0.147541	0.194786	1	24	19.8022	0.418685	0.0283544	0.299813	24	21.7254	0.304931	0.172193	0.172193	0.527314	0.231097	0.215017	0.173521	0.119154	0.299589	0.497604	0.376154
Lck	0.0194935	0.453111	24	23.6274	0.256558	0.113095	0.577886	24	22.5	0.147324	0.390218	1	24	2.74552	0.69041	0.0283615	0.299813	24	0.254668	0.752035	0.290209	0.290209	0.68165	0.641936	0.75256	0.491642	0.565984	0.599177	0.939919	1.34341
Dcaf13	0.0389638	0.51547	24	11.8164	1.80268	0.113095	0.577886	24	12	1.74408	0.195392	1	24	12.4078	18.4977	0.0283799	0.299813	24	12.0747	16.2643	2.00822	0.123474	15.4722	14.8672	16.1263	16.7447	18.6477	18.5412	15.2599	14.4551
Rbm47	0.0391997	0.51547	24	9.96317	14.933	0.113095	0.577886	24	10.5	12.37	0.194273	1	24	9.06015	96.846	0.0283862	0.299813	24	9.84183	76.0412	15.2164	0.200107	68.165	68.3534	83.8567	99.2249	90.6468	65.1772	71.3509	61.5549
Hirip3	0.10614	0.660145	24	21.3731	0.397078	0.0440476	0.413932	24	21	0.463467	0.184231	1	24	20.9999	2.69494	0.0283874	0.299813	24	21.1243	2.07776	0.431052	0.20746	2.27645	1.69471	1.80077	1.3014	2.20436	2.03055	2.65389	2.65995
Gopc	0.484625	0.788912	24	5.17215	0.963278	0.0138889	0.278415	24	6	2.72763	0.128088	1	24	5.00717	33.8753	0.0284079	0.299813	24	5.39251	31.2646	2.50086	0.0799903	32.8478	33.4577	33.7577	33.2292	30.6227	27.2293	29.5245	29.4475
Haus7	0.0363854	0.508851	24	10.8311	1.54702	0.113095	0.577886	24	12	1.48676	0.209515	1	24	13.8467	7.98417	0.0284082	0.299813	24	12.2199	6.62639	1.64901	0.248855	5.00306	6.00852	7.98251	6.56486	8.51954	7.82259	6.22005	4.89
Midn	0.394264	0.788912	24	5.42742	3.54309	0.0138889	0.278415	24	4.5	6.42134	0.157869	1	24	5.36799	30.4364	0.0284658	0.299928	24	5.09908	22.2914	9.65697	0.433216	19.6907	31.2238	28.5973	26.9246	18.886	14.9129	18.052	20.0436
Gpr135	0.13742	0.700594	24	12.8497	0.109129	0.0440476	0.413932	24	15	0.14895	0.14284	1	24	13.8638	0.712784	0.0284693	0.299928	24	13.904	0.542795	0.173101	0.173101	0.450146	0.436517	0.403157	0.549482	0.744715	0.665753	0.635827	0.456759
Uhrf2	0.0193652	0.453111	24	21.6534	3.16025	0.249206	0.801565	24	0	2.75906	0.179472	1	24	20.4871	42.9027	0.0285067	0.299928	24	22.0324	41.066	3.17551	0.077327	45.1175	41.2123	38.945	39.0132	36.7592	41.9091	42.9322	42.6398
Gpr137	0.0204617	0.459068	24	22.1182	0.978936	0.249206	0.801565	24	22.5	1.06913	0.169908	1	24	20.9999	11.3598	0.0285136	0.299928	24	21.8743	10.2199	0.994135	0.0972748	11.2922	10.3737	9.11135	9.68823	9.71109	9.48697	10.8644	11.2309
Slco1a5	0.0442177	0.529901	24	21.8737	0.0881521	0.113095	0.577886	24	19.5	0.118698	0.173453	1	24	20.2694	0.339445	0.0285387	0.299928	24	20.5432	0.205767	0.0982036	0.0982036	0.180059	0.20542	0.107509	0.11568	0.0893659	0.266301	0.359381	0.322418
Crat	0.0415993	0.524288	24	21.9904	11.3814	0.113095	0.577886	24	21	10.0226	0.184492	1	24	20.9999	45.62	0.0285529	0.299928	24	21.3293	31.08	11.9169	0.383427	37.0278	24.9071	29.0273	13.8238	24.665	27.3291	48.7099	43.1503
Ankrd10	0.3446	0.788912	24	18.6859	1.19045	0.0138889	0.278415	24	19.5	1.64577	0.181531	1	24	16.3903	10.2323	0.0285741	0.299928	24	18.206	8.13147	2.5076	0.308381	8.37272	7.6262	4.91852	6.73838	8.22166	10.8518	9.50977	8.81276
Pnisr	0.0925879	0.635516	24	23.7699	7.31183	0.0440476	0.413932	24	0	5.29962	0.21595	1	24	7.0271e-05	63.7737	0.0288685	0.302784	24	23.9233	57.0106	7.99506	0.140238	64.1523	61.3178	59.3985	56.7123	47.1256	44.206	61.537	61.6356
Ubap1	0.0760088	0.609326	24	10.0967	2.02402	0.0440476	0.413932	24	10.5	1.31527	0.265379	1	24	9.3875	36.059	0.0290609	0.30395	24	9.9951	33.2567	2.04642	0.0615341	32.4491	32.0968	33.1933	37.3069	34.8527	32.7217	31.4596	31.9731
Dolk	0.0712021	0.595615	24	10.8058	1.51124	0.0440476	0.413932	24	12	1.02164	0.283612	1	24	11.8024	14.0006	0.0290855	0.30395	24	11.5371	12.0798	1.55643	0.128846	11.0093	11.94	12.2022	12.4646	15.1624	12.2498	10.8091	10.801
Cyp2d11	0.113756	0.66915	24	12.4017	1.05583	0.0440476	0.413932	24	15	0.980397	0.177682	1	24	13.7855	7.02185	0.0291059	0.30395	24	13.7302	5.46746	1.56136	0.285574	4.81014	4.10839	5.07978	5.35022	7.00033	7.35657	5.22484	4.8094
Dpy19l1	0.380941	0.788912	24	17.6854	9.37449	0.0138889	0.278415	24	18	14.1191	0.168346	1	24	15.8054	95.2884	0.0291153	0.30395	24	17.1705	77.6253	25.14	0.323863	82.4282	62.9868	55.8507	67.1525	81.9783	102.193	85.2562	83.1569
Cyhr1	0.0217038	0.466996	24	11.0069	2.87656	0.249206	0.801565	24	12	3.07516	0.16472	1	24	11.7044	44.9687	0.0291211	0.30395	24	11.5708	41.5821	2.99434	0.0720102	39.6129	38.85	41.1489	45.1732	43.8488	44.3724	39.6977	39.9529
Rreb1	0.0412009	0.52369	24	22.9732	7.14876	0.113095	0.577886	24	3	5.93433	0.191419	1	24	7.73643e-05	48.2535	0.0291461	0.30395	24	0.62574	39.4208	7.92892	0.201135	46.5837	48.7101	36.6067	33.4027	35.7166	29.1933	42.3793	42.7741
Epm2aip1	0.0365781	0.509425	24	21.5198	8.48173	0.113095	0.577886	24	22.5	7.92482	0.215726	1	24	18.4217	38.1352	0.0291578	0.30395	24	20.8491	32.9923	9.42697	0.285732	42.288	34.4591	29.753	23.1072	24.3671	32.1559	43.9274	33.8807
Fibp	0.0356153	0.507372	24	11.3388	2.42072	0.113095	0.577886	24	12	2.40046	0.221571	1	24	12.5359	16.2512	0.0291591	0.30395	24	11.9584	13.6372	2.62603	0.192564	11.9868	12.813	14.5674	13.737	16.8008	16.3109	12.0807	10.801
Ncoa4	0.359348	0.788912	24	14.662	5.99455	0.0138889	0.278415	24	16.5	9.04997	0.179833	1	24	14.4414	127.819	0.0292839	0.304537	24	15.1949	116.384	14.0444	0.120673	116.472	104.045	105.224	113.974	125.44	131.053	118.07	116.796
Acnat2	0.0404211	0.520496	24	21.7371	16.793	0.113095	0.577886	24	22.5	12.0736	0.196519	1	24	20.9999	39.7065	0.0293044	0.304537	24	21.7456	21.5841	17.2242	0.798005	45.3233	11.786	12.0947	4.77182	9.71109	25.0323	22.254	41.6994
Sv2c	0.0391201	0.51547	24	9.61724	0.119243	0.113095	0.577886	24	9	0.101984	0.203277	1	24	9.14383	0.357962	0.0293287	0.304537	24	9.25357	0.20372	0.127203	0.127203	0.115752	0.128387	0.268771	0.404881	0.268098	0.199726	0.082934	0.161209
Nabp1	0.036316	0.508851	24	10.6663	6.21827	0.113095	0.577886	24	9	3.65941	0.219294	1	24	9.81309	26.8227	0.0293611	0.304537	24	9.82635	21.0424	6.19251	0.294287	17.6972	17.1012	24.3238	29.4985	21.8946	27.1627	16.4209	14.2401
Coro7	0.128118	0.691599	24	8.56303	2.15314	0.0440476	0.413932	24	9	2.97972	0.159829	1	24	8.43212	14.7548	0.0293927	0.304537	24	8.66496	11.4825	2.49955	0.217683	10.1862	12.6076	14.0836	14.489	13.4049	7.95574	9.67563	9.45759
Igsf8	0.0272665	0.487452	24	9.68057	1.35268	0.113095	0.577886	24	12	1.42613	0.292823	1	24	10.558	8.91657	0.0294178	0.304537	24	10.7433	7.40257	1.3041	0.176169	5.37603	6.23962	7.98251	8.50251	9.20468	7.65616	6.41356	7.8455
Actr1b	0.0419635	0.524288	24	11.2321	4.91034	0.113095	0.577886	24	13.5	4.02586	0.190305	1	24	11.8543	63.3614	0.0294222	0.304537	24	12.1904	57.3832	5.40073	0.0941169	54.7893	50.79	58.2965	60.5876	63.5093	62.2146	53.8795	54.9991
Commd9	0.265853	0.781845	24	12.7483	1.65788	0.0138889	0.278415	24	15	1.28744	0.244724	1	24	14.5295	14.1955	0.0294335	0.304537	24	14.0989	11.1589	2.70709	0.242595	9.60741	9.01279	10.4015	9.94851	13.7326	15.3123	10.6432	10.6129
Stau1	0.0415164	0.524288	24	22.9098	2.66532	0.113095	0.577886	24	3	2.9644	0.192453	1	24	7.73643e-05	48.5155	0.0294336	0.304537	24	0.604494	44.5848	2.92935	0.0657029	48.5386	46.3735	46.1212	40.8352	43.402	41.1102	44.7291	45.5684
Slc17a3	0.087648	0.631757	24	20.4932	17.9565	0.0440476	0.413932	24	19.5	16.5359	0.234334	1	24	18.6672	81.1516	0.0294598	0.304537	24	19.5529	69.9316	25.4665	0.364164	98.4149	59.9569	44.4817	57.204	60.4113	78.2259	82.464	78.2938
Klhl26	0.133343	0.69923	24	1.07862	1.07129	0.0440476	0.413932	24	3	1.3166	0.154102	1	24	3.34538	4.9979	0.0294701	0.304537	24	2.48215	3.86873	1.94172	0.501901	4.34713	5.39227	4.59599	3.64393	2.91928	1.93068	3.0962	5.02435
Ttll3	0.0357755	0.507372	24	23.7129	0.439229	0.113095	0.577886	24	0	0.399031	0.223854	1	24	7.73643e-05	1.61056	0.0294851	0.304537	24	23.9043	1.35987	0.478914	0.352177	1.5305	1.74607	1.18259	1.09896	1.0426	0.965341	1.24401	2.06885
Anp32e	0.0280661	0.49079	24	21.4076	2.31439	0.113095	0.577886	24	0	1.71235	0.28596	1	24	18.0892	13.6166	0.0295331	0.304649	24	21.1939	12.9212	2.49305	0.192942	16.8226	13.0955	12.8204	9.71715	11.0516	12.7825	14.237	12.843
Kcnab1	0.0496129	0.53812	24	11.3985	0.123139	0.113095	0.577886	24	12	0.100764	0.161825	1	24	12.6008	0.509653	0.0295409	0.304649	24	11.9998	0.365907	0.134414	0.134414	0.180059	0.308129	0.268771	0.462722	0.536195	0.432739	0.469959	0.268682
Thra	0.124684	0.686461	24	0.662242	2.11926	0.0440476	0.413932	24	3	2.58491	0.165505	1	24	3.41931	11.5652	0.0295646	0.304662	24	2.37417	8.98748	3.5959	0.400101	9.67172	12.4022	11.0734	7.34571	6.73223	5.59232	8.81865	10.2636
Ddit4	0.0637523	0.575554	24	20.835	2.52029	0.113095	0.577886	24	21	3.34403	0.126436	1	24	20.9999	8.31167	0.0296295	0.304892	24	20.945	5.49122	2.80526	0.510862	7.7811	3.59484	2.44582	1.99549	4.67681	7.78931	7.02175	8.62468
Coq10a	0.0354065	0.507372	24	9.79705	1.75666	0.113095	0.577886	24	12	1.29795	0.227721	1	24	9.88913	14.0623	0.0296357	0.304892	24	10.5534	12.1029	1.72256	0.142326	9.95467	11.94	11.8528	15.1252	13.2857	12.2166	11.0026	11.4458
Letmd1	0.0374867	0.512574	24	9.89818	2.34418	0.113095	0.577886	24	12	1.53569	0.215265	1	24	9.25048	23.9576	0.0296545	0.304892	24	10.3724	20.8421	2.32782	0.111689	18.8547	19.6433	21.1792	24.6978	23.2351	19.6064	19.9871	19.5331
Ubox5	0.0550666	0.554576	24	0.290246	0.568544	0.113095	0.577886	24	1.5	0.710955	0.147023	1	24	3.09429	5.36998	0.0297278	0.304965	24	1.62521	4.83758	0.817361	0.168961	5.11881	5.41794	5.32168	4.36694	4.17041	4.26082	4.61666	5.42737
Ivns1abp	0.119029	0.678138	24	12.7453	32.2614	0.0440476	0.413932	24	15	40.9141	0.174704	1	24	12.5925	180.356	0.029736	0.304965	24	13.435	134.941	46.2702	0.342892	127.571	89.1778	98.3972	160.651	174.978	176.458	142.646	109.649
Lancl1	0.102382	0.654116	24	11.6956	2.55144	0.0440476	0.413932	24	15	2.54441	0.203215	1	24	13.082	20.7789	0.0297476	0.304965	24	13.2534	17.4991	3.26796	0.18675	14.469	15.4835	15.965	19.6078	18.7966	22.7687	16.808	16.094
Ppm1m	0.408387	0.788912	24	13.9835	1.45034	0.0138889	0.278415	24	16.5	2.55875	0.161599	1	24	15.4169	15.2727	0.0297516	0.304965	24	15.3023	11.351	3.31616	0.292147	8.93862	8.34517	9.91767	9.57255	12.6602	16.777	12.8824	11.7145
Acp6	0.396204	0.788912	24	6.54745	1.75572	0.0138889	0.278415	24	6	2.77024	0.166793	1	24	5.62658	28.833	0.0297819	0.305045	24	6.05787	24.9269	3.85262	0.154557	24.5523	27.0897	30.6131	25.4786	25.231	20.8381	22.6133	22.9991
Grk5	0.0436037	0.527824	24	23.4322	4.90402	0.113095	0.577886	24	0	4.87548	0.186378	1	24	0.580377	10.0955	0.0298127	0.30513	24	0.00418203	6.1024	5.36257	0.878765	8.52706	13.6091	4.13908	1.85089	2.11499	2.56315	4.83782	11.1772
Cmss1	0.0385094	0.51547	24	10.3119	0.330941	0.113095	0.577886	24	9	0.296046	0.211536	1	24	6.30339	2.252	0.0298663	0.305448	24	8.56093	1.87925	0.350665	0.186598	1.762	1.97716	2.31143	2.19793	1.87668	2.09712	1.57575	1.23594
Tmem260	0.0198181	0.453111	24	23.0513	2.48691	0.249206	0.801565	24	22.5	2.80795	0.186837	1	24	7.73643e-05	32.877	0.0299019	0.305581	24	23.1829	31.3673	2.53763	0.0809005	32.9507	31.84	31.8225	28.9779	29.0737	28.8271	33.7265	33.7195
Trmt2b	0.0187412	0.453111	24	11.2776	4.30759	0.249206	0.801565	24	12	4.29706	0.197939	1	24	11.9495	33.7334	0.0299437	0.305777	24	11.7426	28.9614	4.57996	0.15814	26.803	27.3465	30.3443	30.048	34.7335	32.8216	25.6819	23.9127
Atl3	0.0551838	0.554576	24	9.32923	7.80049	0.113095	0.577886	24	9	9.7932	0.148549	1	24	6.25977	134.772	0.030008	0.306204	24	8.2175	124.597	9.40943	0.0755189	116.164	132.855	133.096	132.685	126.602	123.464	119.066	112.846
Cracr2b	0.0985749	0.646862	24	11.1476	0.226557	0.0440476	0.413932	24	13.5	0.304526	0.21402	1	24	15.0432	2.78598	0.030061	0.306463	24	13.2427	2.48109	0.269059	0.108444	1.99351	2.13123	2.4727	2.66065	2.50224	2.9626	2.65389	2.47187
Asf1b	0.465077	0.788912	24	16.7209	0.126105	0.0138889	0.278415	24	18	0.232396	0.143985	1	24	15.9897	0.815252	0.0300803	0.306463	24	16.9014	0.495012	0.353011	0.353011	0.437285	0.20542	0.215017	0.347041	0.536195	0.965341	0.635827	0.617968
Gpatch2l	0.0450743	0.530695	24	23.2043	1.34364	0.113095	0.577886	24	3	1.30213	0.182617	1	24	1.71372	14.4831	0.0301013	0.306463	24	1.3237	13.1671	1.62038	0.123062	14.0446	15.0727	13.7073	11.2499	11.8857	12.1833	13.4906	13.7028
Cyp2u1	0.479753	0.788912	24	4.52637	9.65464	0.0138889	0.278415	24	6	20.6506	0.140627	1	24	4.08454	119.01	0.03025	0.307746	24	4.86676	94.1701	27.0387	0.287126	95.251	129.697	113.475	96.7088	93.6852	65.7098	74.2259	84.6078
Nubpl	0.0383914	0.51547	24	10.4796	1.30042	0.113095	0.577886	24	10.5	1.12637	0.216454	1	24	11.184	10.2648	0.0303177	0.308203	24	10.7209	8.845	1.30065	0.147049	8.01261	8.13975	9.7564	9.25443	11.0516	8.98766	7.68522	7.87237
Zw10	0.40076	0.788912	24	16.9006	2.01698	0.0138889	0.278415	24	18	3.18994	0.169572	1	24	15.5751	18.9672	0.0304157	0.308968	24	16.8265	14.6938	5.68994	0.387234	15.0606	11.7603	10.1327	12.4646	15.8475	20.5718	16.5592	15.1536
Crb3	0.0802619	0.620085	24	22.2324	1.12047	0.0440476	0.413932	24	21	0.977048	0.269264	1	24	20.5599	8.68934	0.0306116	0.310465	24	21.262	7.57167	1.16108	0.153345	8.16694	7.31807	7.98251	5.63942	6.19603	8.18876	8.37633	8.70528
Ppp2r2d	0.107887	0.660459	24	9.14774	2.27357	0.0440476	0.413932	24	9	2.43508	0.200424	1	24	8.39671	20.5893	0.0306239	0.310465	24	8.84838	17.3371	2.5588	0.147591	16.4368	16.0484	21.9049	19.4632	18.6775	15.7783	15.2875	15.0999
Rhbdf2	0.0294909	0.496417	24	23.5702	1.49878	0.113095	0.577886	24	0	1.28541	0.285666	1	24	2.61725	8.49457	0.0306318	0.310465	24	0.710023	8.06168	1.77838	0.220596	7.83255	9.39795	7.74062	6.3335	6.85138	7.45643	8.34869	10.5323
Aqp11	0.0445846	0.529901	24	11.1906	5.07064	0.113095	0.577886	24	15	5.07563	0.189331	1	24	11.7018	27.554	0.0306775	0.310696	24	12.5917	21.0313	5.74634	0.273228	17.4657	15.9714	17.5239	28.7466	26.3927	23.8672	19.9318	18.351
Tsnax	0.0199847	0.453111	24	10.9306	2.92497	0.249206	0.801565	24	12	3.13298	0.192198	1	24	11.8281	27.8417	0.0307389	0.310862	24	11.587	24.7088	3.03759	0.122936	22.9832	23.6746	26.2052	25.7389	28.18	27.3957	21.7564	21.7363
Pcyt1a	0.130084	0.693808	24	12.4156	8.8666	0.0440476	0.413932	24	15	9.36112	0.167149	1	24	12.5544	102.717	0.030752	0.310862	24	13.3094	89.9006	12.1954	0.135654	86.2866	72.6158	84.663	92.3419	105.899	99.4967	91.1721	86.7304
Sgta	0.0397805	0.515852	24	10.3446	2.53149	0.113095	0.577886	24	10.5	2.34357	0.21298	1	24	10.7573	36.1179	0.0307628	0.310862	24	10.5339	32.9784	2.52851	0.0766717	32.1019	32.0711	33.8115	35.2536	37.1464	32.3889	29.9945	31.0596
Slc26a10	0.035929	0.507372	24	10.5658	0.483709	0.113095	0.577886	24	10.5	0.451025	0.236299	1	24	11.1424	2.86713	0.0308106	0.311114	24	10.7359	2.2816	0.484429	0.21232	2.35362	2.28529	2.41894	2.89201	2.77034	2.43	1.40988	1.69269
Myo1c	0.0350631	0.507372	24	10.3786	2.72682	0.113095	0.577886	24	13.5	2.13439	0.243474	1	24	9.57807	44.416	0.0309387	0.312175	24	11.117	41.7669	2.72181	0.0651668	37.5165	37.2837	44.186	43.0042	44.7127	43.2073	42.7939	41.4307
Acads	0.110795	0.66362	24	12.2322	19.1586	0.0440476	0.413932	24	15	13.166	0.198481	1	24	13.6261	148.569	0.0310147	0.312709	24	13.6196	120.621	27.3626	0.226848	106.813	101.4	114.497	117.04	149.867	153.955	113.813	107.58
Thpo	0.108075	0.660459	24	23.8352	0.822899	0.0440476	0.413932	24	3	0.834789	0.204751	1	24	0.977127	5.06933	0.0311605	0.313945	24	1.26208	4.22638	1.07118	0.253451	4.73297	5.88014	3.84343	3.90421	3.45548	3.26219	3.84261	4.89
Pik3cb	0.0410893	0.52369	24	10.2897	2.53595	0.113095	0.577886	24	9	2.60197	0.210424	1	24	9.46337	17.8131	0.0312359	0.31429	24	9.58377	14.6408	2.58775	0.176749	13.8131	14.6875	15.1587	17.6991	18.5285	12.7492	12.9101	11.5802
Parp2	0.425036	0.788912	24	2.82663	0.600404	0.0138889	0.278415	24	4.5	0.940496	0.165681	1	24	4.09983	8.07262	0.0312412	0.31429	24	3.81111	6.61372	1.56658	0.236868	6.76506	8.06272	8.38567	6.07322	5.98751	5.49246	5.6948	6.44836
Dirc2	0.0225377	0.472754	24	21.9571	2.11585	0.249206	0.801565	24	0	2.20651	0.174809	1	24	20.9999	37.1099	0.0313314	0.314706	24	22.3095	35.1496	2.11027	0.0600369	37.1306	36.4363	32.5213	33.663	33.2143	35.5512	35.4405	37.2393
Thrap3	0.416637	0.788912	24	4.5847	8.19796	0.0138889	0.278415	24	6	12.9945	0.169729	1	24	5.48018	79.6155	0.0313395	0.314706	24	5.35568	62.1415	21.0378	0.338547	61.5929	74.4389	82.3247	69.4082	56.8069	37.5152	55.317	59.7279
Rpl13	0.260621	0.781845	24	13.0062	22.1808	0.0138889	0.278415	24	15	14.866	0.271481	1	24	14.53	176.599	0.0313522	0.314706	24	14.1827	137.104	37.6726	0.274774	119.52	119.477	117.023	131.847	158.773	197.229	131.92	121.041
Phb	0.263987	0.781845	24	13.1695	11.2392	0.0138889	0.278415	24	15	7.81513	0.269082	1	24	14.457	90.7468	0.0314456	0.315411	24	14.2112	70.8632	19.4488	0.274456	64.5896	58.9554	61.1455	67.4128	83.2592	100.629	67.4253	63.4895
Vcl	0.0509478	0.541919	24	23.8038	8.45389	0.113095	0.577886	24	3	9.49469	0.171422	1	24	2.39032	54.9186	0.0314729	0.315451	24	1.75073	47.8741	11.6711	0.243787	51.8955	58.1851	51.2547	40.2568	40.0955	36.1504	51.3914	53.7632
Mcoln1	0.0386026	0.51547	24	11.0037	2.84326	0.113095	0.577886	24	12	2.22426	0.22703	1	24	10.1861	21.6211	0.0315551	0.315723	24	11.0627	18.1435	2.88332	0.158917	17.4014	15.766	17.4433	22.7023	21.001	18.4081	17.0844	15.3417
Yipf2	0.269909	0.783457	24	13.4814	2.06291	0.0138889	0.278415	24	15	1.82624	0.264597	1	24	14.6921	22.5205	0.0315729	0.315723	24	14.3931	18.8555	3.79435	0.201233	18.0444	16.4336	16.9326	18.6245	20.3456	24.4664	18.909	17.0881
Itpka	0.158315	0.716166	24	12.3004	0.246959	0.0440476	0.413932	24	15	0.465179	0.142472	1	24	12.9053	1.44036	0.0316114	0.315723	24	13.3916	1.04167	0.34178	0.328107	0.655928	0.487872	0.645052	1.33032	1.25112	1.56452	1.21637	1.1822
Tmem254b	0.0412059	0.52369	24	22.0103	14.587	0.113095	0.577886	24	22.5	14.6755	0.213207	1	24	20.9999	104.738	0.0316131	0.315723	24	21.8379	93.0361	14.8597	0.159719	102.26	107.409	79.5832	71.0856	86.2083	95.7685	95.8717	106.102
Kdsr	0.0509399	0.541919	24	11.8825	5.25334	0.113095	0.577886	24	13.5	5.281	0.172491	1	24	12.1899	28.8145	0.0316166	0.315723	24	12.5217	21.9217	6.20944	0.283255	19.9351	15.1754	20.4535	24.8713	28.8354	28.2612	19.5448	18.2972
Ulbp1	0.0838087	0.624058	24	23.1798	0.0798501	0.0440476	0.413932	24	0	0.0584607	0.269571	1	24	5.76687e-05	0.418204	0.0316503	0.315827	24	23.7271	0.345809	0.0845114	0.0845114	0.437285	0.333807	0.403157	0.289201	0.20852	0.332876	0.331736	0.429891
Plxna2	0.0573666	0.560213	24	23.9033	18.2479	0.113095	0.577886	24	3	21.9833	0.153915	1	24	2.782	63.1551	0.0317326	0.316415	24	1.91859	44.6168	26.0974	0.584923	54.532	69.1237	57.8934	24.958	25.7672	22.5024	47.0512	55.1066
Lipa	0.11061	0.663218	24	21.1973	36.3679	0.0440476	0.413932	24	21	37.9643	0.205459	1	24	18.8154	241.243	0.0317905	0.31676	24	20.3477	201.488	43.5521	0.216152	229.69	172.758	195.531	126.612	185.97	227.787	236.417	237.138
Polr3g	0.141008	0.704883	24	20.4584	1.50998	0.0440476	0.413932	24	19.5	1.83748	0.162178	1	24	17.5652	13.2571	0.0319403	0.318018	24	19.1825	11.1902	2.29701	0.20527	12.1411	9.88582	10.2671	8.15547	10.6941	12.7159	13.4906	12.1713
Prkx	0.0178531	0.451707	24	22.6121	0.588244	0.249206	0.801565	24	21	0.467874	0.226814	1	24	20.9999	8.04211	0.0319836	0.318216	24	21.5337	6.77168	0.588948	0.0869722	6.84223	6.21394	6.42364	6.3335	6.2854	6.49109	7.65757	7.92611
Zfp407	0.116341	0.673157	24	23.7892	4.23128	0.0440476	0.413932	24	3	4.58019	0.197461	1	24	1.83053	30.8425	0.0320496	0.318219	24	1.54881	25.9368	5.68652	0.219245	28.7708	34.5875	26.5815	21.9793	23.0266	19.0405	26.3177	27.1906
Map1lc3b	0.0492252	0.536646	24	11.627	14.4249	0.113095	0.577886	24	15	14.6744	0.181767	1	24	12.4701	92.7689	0.0320502	0.318219	24	13.0136	75.6512	17.8193	0.235546	65.4899	62.1394	73.5628	85.4878	86.5657	99.3636	68.1165	64.4836
Tmem97	0.0509572	0.541919	24	11.8024	13.9845	0.113095	0.577886	24	15	15.2966	0.17576	1	24	12.2215	76.3294	0.0320737	0.318219	24	12.9852	57.2183	17.4927	0.305719	48.2171	46.7843	47.6801	68.4539	72.3863	77.0609	50.0368	47.1267
Abhd12	0.158011	0.716166	24	7.8951	1.68865	0.0440476	0.413932	24	7.5	2.22313	0.145558	1	24	6.23876	26.5288	0.0320779	0.318219	24	7.21351	23.8561	2.65367	0.111237	22.3658	25.5491	26.2858	26.1438	23.7117	23.035	20.6506	23.1066
Uqcc2	0.361884	0.788912	24	14.1783	1.30141	0.0138889	0.278415	24	16.5	1.57719	0.201759	1	24	14.9489	15.4993	0.0321014	0.31822	24	15.205	12.6684	2.97597	0.234913	11.9353	10.4764	11.2078	11.6548	13.9411	16.777	13.0759	12.2787
Zfp710	0.044203	0.529901	24	23.843	2.37342	0.113095	0.577886	24	0	2.29123	0.203125	1	24	7.73643e-05	14.3483	0.0321342	0.318265	24	23.9477	12.7253	2.6044	0.204664	14.3275	13.9429	12.5248	12.667	9.86003	9.52026	13.2418	15.7179
Sec31b	0.0423177	0.525501	24	9.42041	1.42407	0.113095	0.577886	24	10.5	1.1564	0.21234	1	24	9.04964	7.67785	0.032153	0.318265	24	9.65529	5.81136	1.46729	0.252486	4.33427	5.49498	6.53115	7.72167	7.44715	4.66027	5.16955	5.13182
A730015C16Rik	0.273557	0.785086	24	12.3553	0.0413139	0.0138889	0.278415	24	15	0.0396635	0.268356	1	24	13.821	0.150725	0.0322324	0.318819	24	13.7274	0.0824438	0.0607924	0.0607924	0.038584	0.0256775	0.0537543	0.0867603	0.119154	0.199726	0.0552893	0.0806045
Specc1	0.02628	0.482512	24	23.3537	0.323483	0.113095	0.577886	24	22.5	0.274856	0.343601	1	24	1.96677	2.1648	0.0322713	0.318909	24	23.9194	2.22685	0.349948	0.157149	2.18643	2.0542	2.25768	1.90873	1.93626	1.99726	2.62624	2.84802
Myg1	0.0476833	0.534374	24	11.3186	1.323	0.113095	0.577886	24	12	1.12982	0.189506	1	24	11.8959	13.1703	0.0322886	0.318909	24	11.7383	11.4772	1.40793	0.122672	10.392	10.6048	10.3477	13.2165	13.2559	11.8837	11.6384	10.4786
Zfp879	0.031719	0.502162	24	21.7175	0.234774	0.113095	0.577886	24	0	0.215023	0.286297	1	24	17.9628	0.704243	0.0324085	0.319609	24	21.287	0.648293	0.249078	0.249078	0.990322	0.796001	0.671929	0.260281	0.476618	0.599177	0.774051	0.617968
4833420G17Rik	0.0383323	0.51547	24	9.96981	3.25386	0.113095	0.577886	24	12	2.2439	0.236911	1	24	9.19985	25.0744	0.0324093	0.319609	24	10.3803	21.274	3.23715	0.152164	17.157	20.2852	21.3405	26.78	23.4436	20.4053	21.8116	18.9689
Dpp9	0.020029	0.453111	24	23.5263	7.45836	0.249206	0.801565	24	0	7.6729	0.205944	1	24	2.42007	35.9899	0.0324302	0.319609	24	0.633427	32.7068	8.74427	0.267354	34.6098	36.616	34.2684	27.0403	23.5926	25.9311	38.7025	40.8933
Abcb10	0.343462	0.788912	24	14.084	4.26824	0.0138889	0.278415	24	16.5	5.03502	0.216613	1	24	14.8367	56.982	0.0325572	0.320627	24	15.1351	47.9176	9.56969	0.199711	45.7863	41.8029	43.2453	43.3802	54.5132	59.5516	48.8481	46.2132
Btg1	0.0389373	0.51547	24	22.831	12.4793	0.113095	0.577886	24	22.5	12.0636	0.235411	1	24	1.84449	48.9992	0.0326364	0.321174	24	23.697	44.0235	12.9609	0.294408	46.8924	50.3021	46.2824	27.2717	29.8184	38.6469	59.0767	53.8975
Dus2	0.0442248	0.529901	24	22.7886	0.991765	0.113095	0.577886	24	1.5	1.0755	0.208281	1	24	7.73643e-05	7.65961	0.0327562	0.322033	24	0.0941401	6.30175	1.04618	0.166014	7.48529	7.47214	6.45052	4.65614	5.95772	5.62561	5.88831	6.87825
Hip1r	0.479855	0.788912	24	14.7669	2.83322	0.0138889	0.278415	24	16.5	6.07582	0.156404	1	24	16.4771	36.8216	0.0327713	0.322033	24	15.9191	29.5596	7.41995	0.251016	25.6069	21.9542	22.9262	31.0313	28.5673	40.1116	35.247	31.0327
Lrp2	0.37496	0.788912	24	19.3433	1.60924	0.0138889	0.278415	24	19.5	2.21256	0.20191	1	24	17.2403	7.84177	0.0329861	0.323769	24	18.7035	4.29769	2.92146	0.679774	4.10276	2.43936	2.33831	2.02441	2.47246	7.58958	8.87394	4.54072
Aen	0.0420807	0.524288	24	10.3098	1.12869	0.113095	0.577886	24	12	1.12495	0.22103	1	24	11.7048	11.4401	0.0329957	0.323769	24	11.3411	10.0829	1.12263	0.11134	9.0801	9.96285	10.3746	10.8161	11.558	10.8185	8.51456	9.5382
Dgkd	0.0215679	0.466996	24	9.6879	3.08504	0.249206	0.801565	24	12	2.43388	0.196962	1	24	9.68064	26.1842	0.0331538	0.325085	24	10.4453	22.669	3.02499	0.133442	18.8547	22.3137	23.1412	26.433	26.4821	21.5704	20.9547	21.602
Cdk10	0.0122961	0.4276	24	11.2808	1.85319	0.488095	1	24	12	1.80341	0.176954	1	24	11.9248	18.3352	0.033233	0.325358	24	11.7355	16.352	1.96946	0.120441	15.4593	15.4578	17.0132	16.9761	18.6477	18.0086	15.094	14.1595
Tnfaip3	0.0303139	0.497919	24	22.9941	0.826839	0.113095	0.577886	24	21	0.60696	0.30993	1	24	20.9999	5.23755	0.0332454	0.325358	24	21.6578	3.26784	0.801692	0.245328	2.77805	3.4151	2.36519	2.19793	2.97886	3.32876	3.73203	5.34676
Rab6b	0.0359758	0.507372	24	22.2198	0.137824	0.113095	0.577886	24	1.5	0.111863	0.261239	1	24	7.73643e-05	0.496317	0.0332537	0.325358	24	23.9096	0.223557	0.13607	0.13607	0.501592	0.282452	0.215017	0.0867603	0.178732	0.0332876	0.248802	0.241813
Ifngr2	0.144364	0.706222	24	7.95505	1.81267	0.0440476	0.413932	24	7.5	2.18825	0.167338	1	24	7.70567	16.9895	0.0332813	0.325393	24	7.72023	14.2433	2.54019	0.178343	13.0157	14.4051	17.3895	16.6291	14.8347	12.2498	11.666	13.7565
Zbtb38	0.0416725	0.524288	24	21.914	3.90866	0.113095	0.577886	24	0	3.97961	0.226687	1	24	7.73643e-05	38.4035	0.0333816	0.325962	24	23.3126	33.2871	3.75852	0.112912	38.6483	32.8928	30.4787	31.5518	29.7588	30.092	37.5967	35.2779
Tgm2	0.0211153	0.463425	24	23.9652	27.3871	0.249206	0.801565	24	1.5	23.953	0.203079	1	24	2.82838	130.208	0.0333875	0.325962	24	1.43287	117.022	36.9978	0.31616	123.675	132.829	124.361	101.163	85.0763	90.1429	123.903	155.029
1110059E24Rik	0.0247422	0.482512	24	11.237	5.27553	0.249206	0.801565	24	12	5.63898	0.17349	1	24	11.7579	22.8204	0.0334136	0.325981	24	11.6651	16.1199	5.56909	0.345478	13.5687	11.7346	13.8686	22.789	21.8053	19.8394	13.0483	12.3056
Vipas39	0.0896919	0.63432	24	10.0439	1.5649	0.0440476	0.413932	24	10.5	0.829856	0.272563	1	24	9.04402	15.3151	0.0335793	0.327362	24	9.86373	13.2794	1.59162	0.119856	12.3212	13.2496	13.1967	16.6869	13.8815	12.6826	12.7442	11.4727
Acsm1	0.0482221	0.534374	24	11.758	29.2373	0.113095	0.577886	24	13.5	27.7259	0.19771	1	24	11.8059	321.149	0.0336127	0.327452	24	12.3503	286.322	33.6291	0.117452	281.419	245.682	278.743	316.27	320.913	305.913	282.086	259.546
Gcnt2	0.0519724	0.544663	24	9.03544	4.63872	0.113095	0.577886	24	9	3.90949	0.183991	1	24	8.03901	30.7463	0.0336877	0.327509	24	8.69228	24.9831	5.34169	0.213812	19.7679	25.6261	28.4898	33.2003	25.231	23.7341	21.784	22.0319
Trib3	0.145919	0.706609	24	8.2594	1.97008	0.0440476	0.413932	24	9	1.8111	0.16856	1	24	6.36642	6.52495	0.0337327	0.327509	24	7.88296	3.15479	2.65077	0.840238	1.45333	3.72323	7.31058	5.6105	2.59161	1.76424	1.57575	1.20907
Exosc8	0.376398	0.788912	24	6.75086	0.509306	0.0138889	0.278415	24	6	0.536513	0.207289	1	24	6.01126	6.80263	0.0337387	0.327509	24	6.25369	5.82722	1.05783	0.181533	5.67184	6.13691	7.36434	5.98646	5.89815	5.19287	4.6443	5.72292
Actr5	0.120614	0.680597	24	11.4597	0.49026	0.0440476	0.413932	24	15	0.524908	0.203986	1	24	14.2778	7.57726	0.0337405	0.327509	24	13.6047	6.83622	0.631592	0.0923892	5.89049	6.39369	6.63866	6.88298	7.29821	7.98903	6.7453	6.85138
1700040L02Rik	0.141194	0.704883	24	8.56884	0.242087	0.0440476	0.413932	24	9	0.258044	0.174321	1	24	6.96816	1.00307	0.0337503	0.327509	24	8.18351	0.628934	0.305368	0.305368	0.48873	0.616259	1.18259	0.838683	0.714927	0.399452	0.41467	0.376154
Nop16	0.390814	0.788912	24	18.0851	3.26379	0.0138889	0.278415	24	19.5	5.26503	0.199839	1	24	15.7868	25.8441	0.0337636	0.327509	24	17.8029	19.5155	7.70484	0.394807	21.144	15.2781	13.2236	13.9395	21.0308	28.3943	21.6458	21.4677
Mfge8	0.0226068	0.472754	24	9.61074	1.02255	0.249206	0.801565	24	10.5	1.0349	0.192812	1	24	7.76969	7.86751	0.0337993	0.327537	24	9.30037	6.88092	1.08662	0.157918	5.59468	6.39369	8.1169	7.77951	7.23863	7.38985	6.22005	6.31402
Rnf187	0.172751	0.727679	24	13.3857	4.5772	0.0440476	0.413932	24	15	6.45311	0.142842	1	24	14.4881	66.8157	0.0338148	0.327537	24	14.2927	58.996	8.18218	0.13869	56.8213	52.4334	54.1843	57.4932	66.8754	66.542	61.8135	55.8052
Pptc7	0.043113	0.52663	24	10.7021	5.33039	0.113095	0.577886	24	12	3.94798	0.223339	1	24	9.84138	26.5897	0.0338626	0.327766	24	10.8459	19.8248	5.35509	0.270121	17.1184	14.97	18.6796	28.8333	25.1416	19.7063	18.1625	15.9866
Stxbp4	0.0341708	0.504733	24	23.3872	0.661387	0.113095	0.577886	24	22.5	0.6074	0.282592	1	24	2.81314	4.17911	0.0339352	0.328234	24	0.186042	3.98713	0.734108	0.184119	4.06418	4.05704	4.32722	3.15229	3.27675	3.59506	4.56137	4.86314
Pcyox1l	0.0401441	0.519077	24	22.1657	0.196887	0.113095	0.577886	24	0	0.215048	0.24154	1	24	19.1535	0.619226	0.0340403	0.328943	24	21.8022	0.549722	0.200295	0.200295	0.720234	0.770324	0.510666	0.260281	0.387252	0.466027	0.718761	0.564231
Tmem219	0.179196	0.733056	24	13.4178	3.72542	0.0440476	0.413932	24	15	5.17393	0.139183	1	24	14.894	33.47	0.0340862	0.328943	24	14.4403	26.5858	6.89402	0.259312	23.832	21.7231	23.3831	25.6232	30.4738	34.3528	30.3262	22.9723
Hs3st3b1	0.0425361	0.525501	24	9.78434	8.3747	0.113095	0.577886	24	12	5.91101	0.228413	1	24	9.06739	95.6704	0.0340913	0.328943	24	10.2715	86.6009	8.32603	0.0961425	77.1422	84.0166	89.7697	101.683	86.7742	89.8433	82.4364	81.1418
5430427O19Rik	0.0188793	0.453111	24	22.8527	0.22071	0.249206	0.801565	24	22.5	0.186128	0.233814	1	24	7.73643e-05	0.556451	0.0341202	0.328943	24	23.1159	0.466813	0.22394	0.22394	0.57876	0.333807	0.322526	0.375961	0.268098	0.332876	0.635827	0.886649
Fancf	0.0457558	0.532927	24	11.0531	0.256767	0.113095	0.577886	24	12	0.276953	0.212662	1	24	12.0407	2.73729	0.0341299	0.328943	24	11.6987	2.42416	0.269829	0.111308	2.17356	2.33665	2.39207	2.60281	2.65119	2.79616	2.18393	2.25693
Msl2	0.0460265	0.532927	24	22.7656	3.70186	0.113095	0.577886	24	3	3.25163	0.212329	1	24	7.73643e-05	37.3922	0.0342407	0.329777	24	0.556424	32.0322	3.98349	0.124359	37.002	36.539	32.1988	29.672	27.614	27.0961	34.8876	31.2477
Scyl1	0.0428681	0.526183	24	10.6183	4.18981	0.113095	0.577886	24	10.5	3.90265	0.229092	1	24	9.39267	36.9497	0.0343663	0.330752	24	10.1716	31.6961	4.18125	0.131917	30.7	26.9356	33.462	38.3481	34.2569	32.7883	29.0545	28.0235
Chd8	0.141935	0.704883	24	0.703858	3.3379	0.0440476	0.413932	24	3	3.73412	0.177838	1	24	2.88559	46.8756	0.0343928	0.330772	24	2.2062	43.4241	5.53186	0.127391	44.886	49.4291	44.4817	41.7317	41.3466	37.5484	41.2458	46.7237
Kcnj2	0.0469786	0.534374	24	21.9376	0.299055	0.113095	0.577886	24	0	0.287775	0.210231	1	24	20.9999	1.58603	0.0345117	0.33168	24	22.3026	1.30113	0.298208	0.229191	1.60767	1.23252	1.10196	1.18572	0.804293	1.39808	1.52046	1.55835
Sbno1	0.101427	0.653897	24	9.91046	5.62235	0.0440476	0.413932	24	9	4.46653	0.250794	1	24	9.05052	92.8358	0.0345922	0.332217	24	9.31974	84.6618	5.91072	0.0698156	84.2031	84.2477	85.0393	97.2872	87.9658	81.6213	78.1791	78.7506
Rhobtb3	0.547858	0.791323	24	4.34814	0.804637	0.0138889	0.278415	24	6	2.18443	0.14775	1	24	4.17084	13.04	0.0346797	0.332441	24	4.83522	10.6737	2.25027	0.210824	12.2311	12.2481	13.9224	10.9029	10.4558	7.28999	9.15039	9.18891
Hcn3	0.0992334	0.647228	24	9.83501	0.0814701	0.0440476	0.413932	24	9	0.0564787	0.257688	1	24	8.99246	0.235934	0.0347282	0.332441	24	9.27532	0.135965	0.0861625	0.0861625	0.0900293	0.154065	0.134386	0.318121	0.148943	0.133151	0.0552893	0.0537363
Slc29a1	0.152876	0.711719	24	20.9157	12.611	0.0440476	0.413932	24	19.5	16.3356	0.167286	1	24	20.9999	162.568	0.0347311	0.332441	24	20.4745	140.754	15.0267	0.106758	145.616	128.67	115.572	130.054	142.658	136.845	167.803	158.818
Meis1	0.0472042	0.534374	24	23.5433	1.12601	0.113095	0.577886	24	0	0.886217	0.2111	1	24	1.53785	5.30509	0.0347425	0.332441	24	0.356361	4.59497	1.28258	0.279127	5.18311	5.52065	4.46161	4.51154	2.59161	3.7615	5.11426	5.61544
G3bp2	0.0394791	0.515578	24	22.0191	9.36914	0.113095	0.577886	24	0	8.6251	0.252546	1	24	20.9999	79.9506	0.0347568	0.332441	24	22.3312	75.1755	9.34975	0.124372	87.8686	81.68	70.5256	63.6821	66.8754	78.8584	69.8857	82.0285
Map2k3	0.0506822	0.541803	24	11.6696	9.06047	0.113095	0.577886	24	13.5	7.95901	0.196766	1	24	12.1912	45.372	0.0347626	0.332441	24	12.4511	32.5876	10.5041	0.322334	25.7741	29.452	26.7696	36.4972	47.1256	42.0423	27.8105	25.2292
Rcor1	0.0248295	0.482512	24	23.0641	3.36528	0.249206	0.801565	24	3	3.16554	0.183798	1	24	7.73643e-05	23.0444	0.0349797	0.334281	24	0.656259	20.5345	3.78091	0.184125	22.2244	24.2652	18.4915	18.1329	17.903	17.1098	22.5857	23.5634
Chp2	0.435376	0.788912	24	5.13444	0.338833	0.0138889	0.278415	24	6	0.629396	0.18827	1	24	5.96721	3.83379	0.0350066	0.334302	24	5.70107	3.13117	0.813612	0.259843	3.27964	3.28671	4.00469	3.67285	2.74055	2.46328	2.37744	3.22418
Naif1	0.0454717	0.532927	24	22.1441	0.802984	0.113095	0.577886	24	22.5	0.725882	0.222583	1	24	20.9999	4.67996	0.0351491	0.335315	24	21.883	3.7314	0.814816	0.218367	4.64294	3.80026	3.22526	2.60281	3.60442	3.62835	3.51087	4.83627
Acaa2	0.142686	0.704883	24	12.7771	87.0224	0.0440476	0.413932	24	15	93.9936	0.182431	1	24	12.9168	770.44	0.035193	0.335315	24	13.556	636.708	128.092	0.201179	605.511	516.964	560.415	633.726	806.08	745.01	643.319	582.636
Eif4enif1	0.320032	0.788912	24	8.58459	0.961684	0.0138889	0.278415	24	9	1.38731	0.258129	1	24	6.05574	20.5647	0.0352108	0.335315	24	7.8973	18.9069	1.27516	0.067444	18.0959	21.0298	19.3247	21.0828	18.3796	18.3748	17.6649	17.3031
Tgfbr1	0.04805	0.534374	24	11.3077	9.7698	0.113095	0.577886	24	12	9.16162	0.211388	1	24	11.9151	58.5179	0.0352424	0.335315	24	11.7412	47.2985	10.396	0.219796	41.1305	39.9284	43.6216	60.7322	52.1897	59.4517	42.2411	39.0932
Uqcrfs1	0.249987	0.777332	24	12.9054	19.3667	0.0138889	0.278415	24	15	11.5193	0.33098	1	24	14.5555	171.699	0.0352526	0.335315	24	14.1586	138.794	32.4536	0.233826	128.279	120.941	130.677	130.863	158.714	188.275	131.533	121.068
Ces3b	0.0902257	0.63432	24	10.367	95.9835	0.0440476	0.413932	24	9	55.6503	0.289688	1	24	9.10064	634.717	0.0353009	0.335315	24	9.48729	501.375	97.8169	0.195097	490.312	468.562	504.592	712.996	545.013	465.561	450.359	373.602
Cdk14	0.0330714	0.504601	24	23.1922	0.530764	0.113095	0.577886	24	22.5	0.446619	0.307973	1	24	2.12922	3.09174	0.0353146	0.335315	24	23.9117	3.10172	0.569722	0.183679	3.07386	3.08129	2.90273	2.92093	2.17457	3.06246	3.62145	3.97649
Plac9b	0.406359	0.788912	24	18.6038	0.326586	0.0138889	0.278415	24	19.5	0.495993	0.204244	1	24	16.42	3.1279	0.035334	0.335315	24	18.1865	2.45198	0.693044	0.282647	2.45651	2.20826	1.74701	1.96657	2.32351	3.46191	2.79211	2.65995
Tsr2	0.0426415	0.525501	24	21.9868	0.626775	0.113095	0.577886	24	0	0.442157	0.239042	1	24	19.8573	8.52621	0.0353354	0.335315	24	21.9501	8.21092	0.63525	0.0773665	8.9129	8.39653	8.25128	7.28787	7.44715	8.55492	8.26576	8.57094
Slc1a3	0.0310419	0.499907	24	23.1167	0.146871	0.113095	0.577886	24	21	0.0987665	0.329017	1	24	20.9999	0.816202	0.0353876	0.335576	24	21.6973	0.472499	0.140832	0.140832	0.38584	0.513549	0.322526	0.289201	0.417041	0.466027	0.552893	0.832913
Lrrc18	0.185291	0.7398	24	7.91722	0.141576	0.0440476	0.413932	24	7.5	0.200342	0.142181	1	24	7.63724	0.499578	0.0355101	0.336502	24	7.6848	0.254357	0.20009	0.20009	0.205781	0.333807	0.456911	0.549482	0.238309	0.0332876	0.082934	0.134341
Slc20a2	0.161689	0.717138	24	8.3162	7.81704	0.0440476	0.413932	24	6	9.50497	0.163123	1	24	6.41519	68.3193	0.0355405	0.336555	24	6.90303	57.1601	12.6784	0.221805	49.6576	66.2478	69.9075	61.7733	64.7605	47.0021	48.7099	49.2225
Taf15	0.180602	0.733887	24	0.701202	1.79334	0.0440476	0.413932	24	3	2.48193	0.14632	1	24	3.24613	18.3898	0.0355913	0.336652	24	2.32793	15.4655	3.03419	0.196191	16.7583	19.4378	17.4433	14.4601	13.2857	11.8171	15.2875	15.2342
Slc6a13	0.0566289	0.558602	24	21.544	11.3282	0.113095	0.577886	24	21	11.1359	0.181975	1	24	20.9999	166.022	0.0356247	0.336652	24	21.1812	152.939	12.1849	0.0796718	164.098	146.207	147.878	133.206	150.075	157.417	157.105	167.523
Tmem67	0.0251901	0.482512	24	22.9604	0.90896	0.249206	0.801565	24	0	0.844429	0.185659	1	24	1.32523	3.81009	0.0356254	0.336652	24	0.0936614	3.2433	0.97317	0.300055	3.63976	4.10839	3.11775	2.54497	1.87668	2.86274	3.98083	3.81528
Afap1l1	0.0488876	0.535749	24	10.95	0.474772	0.113095	0.577886	24	12	0.463104	0.211139	1	24	12.1637	4.50064	0.0356686	0.336657	24	11.7057	3.96183	0.496637	0.125355	3.39539	3.72323	3.97782	4.28017	4.28956	4.72684	3.59381	3.70781
Mtx3	0.466264	0.788912	24	4.56125	3.18828	0.0138889	0.278415	24	6	4.76426	0.180312	1	24	4.99999	26.7694	0.0356755	0.336657	24	5.18598	19.262	8.49225	0.440881	19.2791	24.3936	29.753	19.174	17.8732	10.3192	15.8128	17.4912
Hist1h2bq	0.18085	0.733968	24	20.6603	0.675458	0.0440476	0.413932	24	19.5	1.40614	0.147213	1	24	19.6325	5.18667	0.0357899	0.337292	24	19.9299	3.74275	0.887259	0.237061	3.34394	2.92723	2.55333	2.57389	3.33633	5.32602	4.56137	5.3199
Aspg	0.0654331	0.57728	24	8.74227	38.5574	0.113095	0.577886	24	9	43.792	0.158486	1	24	6.57397	182.704	0.0357926	0.337292	24	8.11569	133.363	48.9035	0.366694	82.4025	159.945	185.157	165.654	155.139	110.615	107.4	100.594
Echdc2	0.148452	0.707515	24	12.8245	15.0031	0.0440476	0.413932	24	15	17.2731	0.179646	1	24	13.1803	165.532	0.0358355	0.337346	24	13.6618	142.596	22.6228	0.158649	135.854	123.637	126.484	148.62	159.727	172.397	140.435	133.615
Per2	0.159947	0.716166	24	12.91	15.7719	0.0440476	0.413932	24	15	21.8482	0.166815	1	24	12.8258	56.7883	0.0358481	0.337346	24	13.5702	33.9766	23.4383	0.689834	28.4235	8.80737	12.686	48.5858	49.8066	59.2187	39.8083	24.4769
Sf1	0.51925	0.788912	24	3.06248	2.08022	0.0138889	0.278415	24	6	3.93799	0.16348	1	24	3.79626	49.9906	0.0359329	0.337909	24	4.27402	43.9936	5.61578	0.12765	44.9246	53.6145	46.7125	45.3756	41.1679	38.3806	40.6377	41.1351
Snapin	0.399734	0.788912	24	6.73834	1.29297	0.0138889	0.278415	24	7.5	1.95475	0.212645	1	24	7.88676	15.6259	0.0359691	0.338015	24	7.3755	13.0556	1.95061	0.149408	13.0671	13.7374	15.7769	15.3277	13.2857	9.22067	11.8043	12.225
Cyp8b1	0.0431614	0.52663	24	22.6107	34.6208	0.113095	0.577886	24	21	20.1356	0.242612	1	24	20.9999	243.307	0.036053	0.338569	24	21.5333	192.374	34.666	0.180201	196.663	211.608	166.181	143.791	187.192	164.84	230.639	238.079
Polr2l	0.0692268	0.589624	24	12.0296	1.79494	0.113095	0.577886	24	15	2.17707	0.151419	1	24	12.1804	13.3873	0.0360807	0.338594	24	13.0486	10.9055	2.30558	0.211415	10.0318	8.13975	9.48763	12.6381	13.2559	12.7492	10.9196	10.0218
Fgg	0.0647991	0.57668	24	23.9395	368.541	0.113095	0.577886	24	1.5	357.998	0.161944	1	24	2.40186	3059.6	0.0361105	0.338639	24	1.28431	2701.97	486.216	0.179949	3011.43	3006.39	2968.9	2538.72	2031.67	2523.1	2498.06	3037.47
1600014C10Rik	0.129979	0.693808	24	12.8541	22.763	0.0440476	0.413932	24	13.5	27.1014	0.207821	1	24	13.1705	165.382	0.0361791	0.339048	24	13.1749	136.465	31.0755	0.227717	136.343	99.1407	119.684	149.662	166.667	159.281	148.341	112.604
Zfp667	0.0446555	0.529901	24	22.0831	0.482208	0.113095	0.577886	24	0	0.435212	0.23595	1	24	7.73643e-05	2.79028	0.0362198	0.339194	24	23.3671	2.3124	0.470726	0.203566	2.82949	2.36233	2.36519	1.79305	1.69795	2.13041	2.90269	2.41813
Gpn2	0.0541833	0.550403	24	11.8439	0.792699	0.113095	0.577886	24	13.5	0.778525	0.195545	1	24	12.4985	7.95935	0.0363704	0.34037	24	12.6132	6.89314	0.946644	0.137331	6.22488	6.75317	6.34301	7.17218	8.07272	7.78931	6.71765	6.0722
Gm14403	0.0260047	0.482512	24	11.0862	14.4381	0.249206	0.801565	24	12	13.6863	0.186586	1	24	10.4037	43.33	0.0366167	0.342155	24	11.1627	26.5661	14.7205	0.554108	22.1986	9.29524	27.4416	45.2889	40.4529	33.0546	20.1806	14.6163
Tmem143	0.0470922	0.534374	24	9.80049	2.39043	0.113095	0.577886	24	12	2.09723	0.227246	1	24	9.04109	18.2238	0.0366418	0.342155	24	10.2683	14.9546	2.3782	0.159029	12.887	13.5834	16.0725	19.0005	16.6816	13.4815	14.8452	13.0848
Rnf135	0.124305	0.685937	24	21.4913	0.878008	0.0440476	0.413932	24	21	1.09357	0.221196	1	24	20.9999	9.66136	0.0366607	0.342155	24	21.1636	8.35945	0.947147	0.113303	9.04151	7.26672	8.17065	6.65162	8.19187	8.78793	9.01216	9.75314
Pde4a	0.120048	0.68015	24	21.1416	0.52129	0.0440476	0.413932	24	21	0.497701	0.229053	1	24	18.2766	3.18499	0.0366622	0.342155	24	20.1586	2.6384	0.642389	0.243476	3.02241	2.41368	2.28456	2.08225	2.11499	2.66301	3.73203	2.79429
Pld1	0.167254	0.723534	24	0.977243	3.51454	0.0440476	0.413932	24	3	4.24853	0.164581	1	24	3.50314	16.7561	0.0366915	0.342193	24	2.5026	12.177	6.32581	0.519491	13.4529	18.2567	15.7769	10.2956	8.78764	5.1263	11.7213	13.9983
Hdac3	0.052484	0.545714	24	9.93283	2.79256	0.113095	0.577886	24	10.5	2.8423	0.20519	1	24	10.7911	29.5499	0.0368143	0.343102	24	10.4082	26.549	2.77201	0.104411	25.1053	26.0113	29.1348	28.226	30.1163	27.1294	21.9499	24.7187
Timm13	0.30013	0.788912	24	12.8686	6.05879	0.0138889	0.278415	24	15	3.23488	0.292912	1	24	14.629	45.0008	0.036883	0.343453	24	14.1717	33.6934	10.1448	0.30109	28.2563	27.2438	30.5593	29.8166	40.9891	50.7304	31.3491	30.6028
Atp5s	0.223522	0.770189	24	7.92045	0.334601	0.0440476	0.413932	24	6	0.849823	0.124112	1	24	4.86537	3.48455	0.0369046	0.343453	24	6.25471	2.58099	0.635117	0.246075	2.75232	3.49213	3.46715	2.97877	2.47246	1.96397	1.96277	1.55835
Phf21b	0.0484158	0.534374	24	21.8305	0.0817627	0.113095	0.577886	24	0	0.0672472	0.223353	1	24	19.0617	0.536926	0.0369279	0.343453	24	21.6462	0.48073	0.0843632	0.0843632	0.553037	0.487872	0.483789	0.347041	0.417041	0.466027	0.580538	0.510495
Dexi	0.0374942	0.512574	24	21.0253	3.74937	0.249206	0.801565	24	21	4.6648	0.131252	1	24	18.6743	18.0976	0.0370044	0.343928	24	20.2444	14.6836	4.59838	0.313164	17.8772	14.1996	10.5627	10.0064	11.7069	18.0752	17.3885	17.6524
Mtg1	0.0459676	0.532927	24	11.6124	1.6479	0.113095	0.577886	24	12	1.43279	0.237798	1	24	12.971	11.2072	0.0372254	0.345745	24	12.1934	9.27496	1.85029	0.199493	7.96116	9.32092	9.0576	9.51471	11.409	11.2179	8.62514	7.09319
Adam9	0.0225924	0.472754	24	22.7472	4.10119	0.249206	0.801565	24	21	3.97348	0.219795	1	24	7.73643e-05	84.3272	0.0372532	0.345766	24	22.5868	82.4781	4.09895	0.0496975	85.1291	79.4974	81.7872	79.993	77.4802	81.0887	85.7814	89.0679
Pgap2	0.105628	0.659326	24	9.50155	2.20007	0.0440476	0.413932	24	9	1.82711	0.267331	1	24	9.88592	21.2612	0.0373948	0.346842	24	9.46258	18.5199	2.30797	0.124621	17.0541	18.6162	18.6527	22.5577	20.1073	18.3748	14.9558	17.8405
Kctd20	0.228642	0.772198	24	7.32319	1.27761	0.0440476	0.413932	24	7.5	1.958	0.123727	1	24	6.75011	35.8851	0.0374455	0.347075	24	7.19131	33.6571	2.05114	0.0609422	33.1822	35.3322	35.451	35.9188	33.8697	31.1239	31.6808	32.6985
Xrn2	0.151518	0.70923	24	8.59301	5.71715	0.0440476	0.413932	24	7.5	7.34824	0.18707	1	24	8.64307	61.7568	0.0374999	0.347342	24	8.24655	52.2881	7.1284	0.136329	50.5836	51.2522	61.1724	60.3852	57.1346	43.4071	46.2219	48.1477
Crybg3	0.171118	0.726278	24	19.9583	4.61035	0.0440476	0.413932	24	18	4.69616	0.166345	1	24	17.9907	25.826	0.0376181	0.348199	24	18.6431	20.8272	8.13002	0.390356	25.3111	17.5634	10.724	18.3932	18.737	25.1654	26.6495	24.0739
Snx8	0.201604	0.755097	24	12.7484	1.38686	0.0440476	0.413932	24	15	2.45843	0.141536	1	24	12.4982	15.0577	0.0376866	0.348594	24	13.4041	12.6466	1.97707	0.156332	11.3823	9.52634	10.1864	13.7081	15.222	14.3803	13.6288	13.1385
Rb1cc1	0.092799	0.635516	24	10.5035	6.93896	0.0440476	0.413932	24	9	2.74759	0.307877	1	24	9.10369	76.1589	0.0377223	0.34868	24	9.53315	68.014	7.00182	0.102947	65.9657	66.2222	68.698	83.0007	67.7393	70.0705	64.2462	58.1696
Ipo5	0.0506979	0.541803	24	10.9323	9.95643	0.113095	0.577886	24	15	7.77362	0.219682	1	24	11.6413	69.063	0.0377473	0.34868	24	12.4813	55.2821	10.8893	0.196977	48.5001	46.9897	49.2658	68.6274	69.5862	58.3532	49.401	51.5331
Slc23a3	0.0985633	0.646862	24	9.76887	0.121655	0.0440476	0.413932	24	10.5	0.0737532	0.290795	1	24	8.95755	0.307624	0.0378117	0.349037	24	9.74232	0.138469	0.124804	0.124804	0.0514453	0.0770324	0.18814	0.404881	0.148943	0.0998629	0.110579	0.0268682
Stxbp6	0.446346	0.788912	24	1.40931	0.602979	0.0138889	0.278415	24	3	0.897755	0.203869	1	24	7.03962e-05	9.8274	0.0378419	0.349078	24	1.46818	8.61984	0.886297	0.102821	9.74889	10.0142	8.95009	9.48579	7.89398	6.32465	8.26576	8.27539
Adipor1	0.125727	0.687542	24	11.9422	9.63832	0.0440476	0.413932	24	15	7.20111	0.228846	1	24	13.6949	108.155	0.03792	0.349335	24	13.5498	95.5231	13.2019	0.138207	88.7817	82.1935	95.6826	97.6053	104.35	114.975	90.481	90.1158
Flywch1	0.0485183	0.534965	24	22.8637	1.69824	0.113095	0.577886	24	0	1.89391	0.230975	1	24	7.73643e-05	11.7095	0.0379213	0.349335	24	23.6225	10.2577	1.76092	0.171669	11.6524	11.0927	9.70265	9.65931	8.16208	8.28862	12.2189	11.2846
Dhrs3	0.0732172	0.600514	24	0.070841	20.9301	0.113095	0.577886	24	3	21.2035	0.153349	1	24	2.73257	133.93	0.0379749	0.349591	24	1.95342	112.507	30.816	0.273903	130.079	130.441	131.456	104.604	79.8037	82.287	118.623	122.761
Actr3b	0.173922	0.728166	24	12.8028	0.0437456	0.0440476	0.413932	24	15	0.0629594	0.16601	1	24	14.9514	0.258177	0.0380186	0.349756	24	14.2603	0.186441	0.0739802	0.0739802	0.141475	0.128387	0.161263	0.202441	0.20852	0.266301	0.248802	0.134341
Zbtb46	0.0418734	0.524288	24	21.9994	1.05217	0.113095	0.577886	24	0	1.094	0.269424	1	24	19.8736	8.49561	0.0381103	0.350141	24	21.9598	8.27129	1.06588	0.128866	9.40163	9.6804	7.7675	6.56486	7.74504	8.08889	8.43162	8.49034
Spast	0.0482308	0.534374	24	22.5941	3.60548	0.113095	0.577886	24	0	2.8904	0.233927	1	24	20.9999	42.2942	0.0381122	0.350141	24	22.533	39.0234	3.6052	0.0923855	42.3652	40.9042	38.0312	35.832	33.7803	40.7441	37.5415	42.9891
Erbb2	0.148119	0.707515	24	7.70011	0.214263	0.0440476	0.413932	24	7.5	0.27271	0.19585	1	24	6.65504	1.39153	0.038152	0.350269	24	7.2857	1.08475	0.333638	0.307571	0.835986	1.23252	1.37073	1.35924	1.13197	0.898766	0.774051	1.07473
BC106179	0.0933907	0.635814	24	8.47463	0.182462	0.113095	0.577886	24	9	0.243229	0.121388	1	24	7.8648	0.685161	0.0382478	0.350693	24	8.44658	0.398281	0.219965	0.219965	0.308672	0.462194	0.671929	0.694082	0.446829	0.166438	0.221157	0.214945
Ncald	0.180306	0.733469	24	1.12774	2.71217	0.0440476	0.413932	24	3	3.61223	0.161468	1	24	3.88329	14.3872	0.0382541	0.350693	24	2.67764	10.5468	5.11899	0.485359	11.9353	13.9172	14.9168	9.34119	6.7918	5.55903	10.1179	11.7951
Slc16a13	0.483936	0.788912	24	18.7509	0.116096	0.0138889	0.278415	24	18	0.219357	0.191071	1	24	20.9999	1.32985	0.0382955	0.350693	24	19.2373	1.09082	0.182717	0.167504	1.15752	0.770324	0.698806	1.07004	1.22133	1.16507	1.32694	1.31654
Smpd1	0.290119	0.788912	24	11.4883	1.38891	0.0138889	0.278415	24	15	2.44099	0.318788	1	24	12.1734	44.3432	0.0383017	0.350693	24	12.8616	41.7975	1.66358	0.039801	39.8701	39.4149	39.9394	43.3512	43.4318	44.8052	40.4441	43.1234
Zeb1	0.160741	0.717098	24	0.584678	2.49757	0.0440476	0.413932	24	3	2.59913	0.183051	1	24	2.6104	27.5262	0.0385566	0.352514	24	2.0739	24.8221	3.9927	0.160853	26.4686	29.2723	24.7539	25.9124	21.1499	20.5052	23.9956	26.5189
F830016B08Rik	0.049569	0.53812	24	23.8179	8.8856	0.113095	0.577886	24	0	9.16429	0.231287	1	24	6.82588e-05	38.8962	0.0385687	0.352514	24	23.9393	33.5888	9.7386	0.289936	39.1756	36.7444	33.5696	33.4027	22.0436	21.8034	37.1821	44.7892
Decr2	0.0513945	0.541919	24	12.1051	30.2649	0.113095	0.577886	24	13.5	27.9976	0.223149	1	24	12.112	171.367	0.0385786	0.352514	24	12.5701	133.811	36.3262	0.271474	132.87	98.2676	124.602	152.698	175.723	159.448	126.336	100.541
Haus1	0.0460859	0.532927	24	10.3547	0.299313	0.113095	0.577886	24	12	0.266792	0.249797	1	24	13.3071	3.48828	0.0386872	0.353269	24	11.8902	3.24123	0.300191	0.0926164	2.73946	3.08129	3.46715	3.23905	3.69379	3.32876	3.31736	3.06297
S1pr2	0.0622994	0.568498	24	21.7632	0.727989	0.113095	0.577886	24	21	0.828218	0.185218	1	24	19.3556	5.63952	0.0387543	0.353446	24	20.7112	4.70242	0.80755	0.171731	4.823	4.4422	4.3541	3.84637	3.69379	5.05972	6.02654	5.37363
Wbp11	0.195577	0.751221	24	1.04589	0.8137	0.0440476	0.413932	24	3	0.952815	0.151723	1	24	3.73657	15.6222	0.0387993	0.353446	24	2.60264	14.4245	1.50202	0.10413	15.0606	15.5349	15.5887	14.3733	13.1964	12.6493	14.4305	14.5625
2010111I01Rik	0.062273	0.568498	24	11.5377	5.56993	0.113095	0.577886	24	12	4.30725	0.185598	1	24	12.0946	29.7398	0.038801	0.353446	24	11.8775	21.9017	6.03674	0.275629	16.5268	18.8729	16.3144	26.7222	31.5759	24.3998	22.558	18.2435
Morn1	0.0936672	0.635814	24	10.2009	0.293965	0.0440476	0.413932	24	12	0.0777139	0.317186	1	24	9.84526	2.41072	0.0388346	0.353446	24	10.6759	2.0161	0.292098	0.144883	1.78772	1.87445	1.8814	2.57389	2.3533	1.89739	1.87984	1.88077
Rbm3	0.0550284	0.554576	24	11.6548	8.84801	0.113095	0.577886	24	12	8.57273	0.210295	1	24	14.0805	49.1128	0.0388371	0.353446	24	12.569	39.2947	10.3922	0.264468	33.0407	32.0198	41.6058	42.6861	45.1298	53.9925	36.4357	29.4475
Susd1	0.170515	0.726278	24	12.1601	1.49728	0.0440476	0.413932	24	15	2.1438	0.174861	1	24	15.0119	10.5709	0.038938	0.353979	24	14.0778	8.3262	2.27095	0.272747	6.49497	4.77601	8.60069	8.70495	9.62172	10.3525	10.6432	7.41561
Slc16a12	0.0662452	0.580277	24	12.0229	33.2277	0.113095	0.577886	24	15	33.612	0.175359	1	24	12.1341	130.738	0.0389479	0.353979	24	13.0302	83.702	42.5443	0.508283	72.3321	40.4933	61.0918	108.161	134.376	115.375	74.8341	62.9521
Helz2	0.0305684	0.499907	24	23.6499	41.3728	0.249206	0.801565	24	3	36.6656	0.172849	1	24	1.76621	169.103	0.0390125	0.354329	24	1.48189	141.742	54.1436	0.381988	156.098	192.838	137.638	111.256	103.664	94.67	156.248	181.521
Mpp7	0.259515	0.780751	24	7.14631	1.19301	0.0440476	0.413932	24	6	2.45624	0.115527	1	24	5.99363	9.96599	0.0390974	0.354825	24	6.37869	7.48039	2.36302	0.315895	7.16376	9.62905	9.29949	9.94851	6.73223	5.52575	5.41835	6.12594
Mon1a	0.454733	0.788912	24	15.2791	1.27864	0.0138889	0.278415	24	16.5	2.00831	0.209255	1	24	15.1525	13.6618	0.0391195	0.354825	24	15.6421	10.6259	3.33272	0.313642	10.2633	8.11408	8.78883	8.99415	11.8857	15.046	11.1408	10.7741
Amacr	0.0657719	0.578024	24	23.4045	12.9313	0.113095	0.577886	24	1.5	13.8769	0.177951	1	24	7.73643e-05	114.138	0.0391653	0.355003	24	0.297733	92.8691	14.5211	0.156361	114.813	99.6542	96.9996	83.3188	87.4594	72.2009	84.178	104.329
Mat1a	0.209786	0.761536	24	12.9073	328.699	0.0440476	0.413932	24	15	527.732	0.143823	1	24	14.9448	2799.02	0.0392821	0.355824	24	14.2917	2131.69	565.101	0.265096	1671.65	1599.99	1977.03	1813.58	2751.1	2740.17	2501.73	1998.24
Cmpk2	0.0468597	0.534374	24	0.14573	3.07866	0.113095	0.577886	24	0	2.49457	0.251529	1	24	3.14982	8.22357	0.0393699	0.356376	24	1.07259	6.44802	4.00063	0.620443	6.71361	9.1155	7.55248	3.70177	3.33633	4.2941	5.63951	11.2309
Ccdc28b	0.512884	0.788912	24	15.7814	0.356475	0.0138889	0.278415	24	16.5	0.672719	0.187297	1	24	15.647	4.30754	0.0393957	0.356376	24	15.9758	3.32765	0.983879	0.295667	3.1253	2.36233	2.98336	2.66065	3.60442	4.66027	3.73203	3.49286
Naa35	0.0652717	0.57728	24	9.54239	2.14098	0.113095	0.577886	24	10.5	1.48724	0.180917	1	24	8.43513	22.9155	0.0394247	0.356401	24	9.49313	20.4189	2.23968	0.109687	18.5074	22.2624	21.2329	23.7434	21.8648	18.8408	19.4618	17.4374
Ankrd23	0.0352838	0.507372	24	21.583	1.07309	0.249206	0.801565	24	21	1.20982	0.152662	1	24	20.9999	5.07721	0.0395745	0.357332	24	21.1942	3.89701	1.15172	0.295539	4.64294	3.95433	2.49957	3.09445	2.68098	4.69356	4.47844	5.13182
Mylip	0.0517437	0.543549	24	11.0287	1.62066	0.113095	0.577886	24	13.5	1.56871	0.229468	1	24	9.55497	11.9486	0.0395851	0.357332	24	11.3455	9.98461	1.66735	0.166992	9.32446	7.88298	10.0521	12.4935	11.2899	10.2526	10.1179	8.46347
Dync1li1	0.0271762	0.487452	24	10.1591	2.70272	0.249206	0.801565	24	12	2.36408	0.198434	1	24	9.34601	22.466	0.0396081	0.357332	24	10.4947	18.9889	2.6923	0.141783	17.1313	16.3052	19.8891	23.3674	20.9712	19.0405	17.5544	17.6524
Rbl1	0.0535784	0.548369	24	22.2338	0.663492	0.113095	0.577886	24	21	0.777999	0.222098	1	24	20.9999	3.81283	0.0396496	0.357332	24	21.4096	2.81845	0.683348	0.242455	2.97097	2.46504	2.74147	1.87981	1.93626	3.39534	3.28972	3.86901
C330018D20Rik	0.056081	0.557151	24	20.8838	1.86627	0.113095	0.577886	24	21	1.94541	0.212287	1	24	18.3148	10.4998	0.0396636	0.357332	24	20.0821	9.29406	2.36312	0.254261	11.8324	8.85872	7.74062	6.65162	8.31102	10.7186	9.8415	10.398
Yipf3	0.0285941	0.49079	24	10.2312	2.19108	0.249206	0.801565	24	12	2.01313	0.189095	1	24	11.5464	21.5	0.039686	0.357332	24	11.2617	18.915	2.16712	0.114572	16.9641	19.4378	18.6259	21.5166	21.2989	19.673	16.3933	17.4106
Dmtf1	0.226703	0.772198	24	0.929278	2.17963	0.0440476	0.413932	24	3	3.68089	0.135359	1	24	6.29106e-05	24.1452	0.0397778	0.357921	24	1.29975	20.029	3.06036	0.152796	24.1664	23.726	21.4211	22.4131	16.1752	15.0127	17.1397	20.178
Steap3	0.0686084	0.588425	24	23.4604	3.05037	0.113095	0.577886	24	3	4.57109	0.174355	1	24	1.71652	15.7573	0.0398042	0.357921	24	1.40449	12.0157	3.85442	0.320781	15.2921	15.5349	15.4006	7.60599	8.87701	8.78793	12.0531	12.5743
Abtb1	0.0298927	0.496417	24	9.46362	2.89141	0.249206	0.801565	24	9	2.92504	0.181902	1	24	8.6778	19.3945	0.0398521	0.358114	24	9.04705	16.3732	3.15727	0.192831	12.707	16.2538	19.7547	18.0751	19.452	15.2124	15.3981	14.1327
Sbf2	0.431996	0.788912	24	5.93404	5.20201	0.0138889	0.278415	24	7.5	8.12486	0.226051	1	24	6.44626	49.1093	0.0398789	0.358117	24	6.62551	38.9131	9.63476	0.247597	37.002	45.4491	48.7551	47.4579	38.0699	22.6356	35.7169	36.2183
Rin1	0.0347633	0.507226	24	23.4948	0.0693552	0.113095	0.577886	24	22.5	0.0660667	0.345565	1	24	20.9999	0.399585	0.0399293	0.358333	24	22.3346	0.275555	0.0662612	0.0662612	0.244365	0.333807	0.241894	0.202441	0.20852	0.266301	0.304091	0.403022
Hspa2	0.362682	0.788912	24	14.0028	0.881127	0.0138889	0.278415	24	15	0.80796	0.270086	1	24	14.9534	4.27604	0.0399703	0.358463	24	14.6528	2.45003	1.77129	0.722965	2.01923	1.23252	1.66638	2.02441	2.85971	5.25945	2.79211	1.74643
Pbrm1	0.472476	0.788912	24	5.7792	5.0769	0.0138889	0.278415	24	7.5	7.52102	0.207743	1	24	7.22756	72.7773	0.0400302	0.358763	24	6.83878	62.8197	8.64987	0.137694	63.5607	68.8926	73.6971	70.0734	64.1349	44.5056	57.7774	59.916
Acy1	0.028083	0.49079	24	10.434	4.89356	0.249206	0.801565	24	12	3.40934	0.194969	1	24	11.1676	32.0633	0.0400572	0.358767	24	11.2003	25.9416	4.90136	0.188938	22.353	24.4706	24.4582	32.8243	32.1717	26.0309	22.171	23.0529
Lpin2	0.0948793	0.637882	24	10.2751	118.547	0.0440476	0.413932	24	13.5	141.305	0.326831	1	24	9.16794	429.735	0.0400879	0.358805	24	10.9407	278.2	117.767	0.423317	152.818	154.501	347.602	404.91	426.662	200.092	358.081	180.93
Osbpl11	0.0246595	0.482512	24	22.9861	2.26439	0.249206	0.801565	24	0	2.25488	0.222804	1	24	20.9999	26.4742	0.0401597	0.359002	24	22.6706	23.2283	2.2596	0.0972781	23.5491	25.3693	21.0448	21.7768	20.9116	22.6023	24.1338	26.4383
Hist1h1d	0.163303	0.717814	24	21.0914	2.47598	0.0440476	0.413932	24	21	3.0049	0.190368	1	24	20.9999	14.6774	0.0401628	0.359002	24	21.0304	10.6765	2.72531	0.255263	10.9579	9.14117	7.98251	4.65614	12.0644	12.5161	13.0206	15.073
Tecpr2	0.051583	0.542702	24	22.9084	2.7205	0.113095	0.577886	24	0	2.73511	0.235056	1	24	7.73643e-05	19.5572	0.0402047	0.359139	24	23.6373	16.7058	2.82948	0.169371	19.0605	18.7189	15.3469	13.4768	16.6518	13.4815	16.9738	19.9362
Lmcd1	0.178426	0.732461	24	8.89632	0.084027	0.0440476	0.413932	24	9	0.113342	0.174895	1	24	6.01322	0.589779	0.040276	0.359405	24	7.99228	0.430466	0.107802	0.107802	0.398701	0.539227	0.56442	0.578402	0.357463	0.432739	0.304091	0.268682
Trp53	0.478328	0.788912	24	4.92586	0.953581	0.0138889	0.278415	24	6	1.38666	0.206983	1	24	4.89064	9.53356	0.0402875	0.359405	24	5.27106	7.06282	2.52701	0.35779	6.2506	9.57769	9.78328	7.08542	6.22582	5.1263	6.22005	6.23341
Lsm14b	0.0291078	0.493667	24	10.1082	1.64884	0.249206	0.801565	24	10.5	1.20491	0.189998	1	24	9.59094	20.7888	0.0403555	0.359775	24	10.0665	18.6536	1.66261	0.089131	17.6972	17.6661	19.0559	20.8514	20.8222	18.0419	17.3609	17.733
Bhmt	0.0665003	0.5808	24	23.5246	476.512	0.113095	0.577886	24	3	538.412	0.18362	1	24	0.0672483	2440.06	0.0404155	0.360073	24	0.836266	1925.98	571.161	0.296556	2293.95	2718.83	1858.98	1419.43	1720.02	1334.93	1758.48	2303.22
Rbm12b1	0.0569016	0.558602	24	20.9876	1.94397	0.113095	0.577886	24	21	1.92799	0.216899	1	24	18.6639	7.95181	0.0407365	0.362694	24	20.2282	6.71579	2.39457	0.356558	9.20871	6.52207	4.46161	5.3213	5.21301	6.59095	9.28861	7.12006
Zfp57	0.0512066	0.541919	24	22.4502	0.129416	0.113095	0.577886	24	21	0.111991	0.242523	1	24	20.9999	0.529349	0.0409243	0.364062	24	21.4808	0.297226	0.131203	0.131203	0.347256	0.282452	0.18814	0.144601	0.20852	0.366164	0.276447	0.564231
Plekhg3	0.0513618	0.541919	24	9.5806	6.71389	0.113095	0.577886	24	12	6.05149	0.241947	1	24	8.69072	37.0686	0.0409439	0.364062	24	10.0741	28.8282	6.712	0.232827	20.8353	25.7802	35.2359	38.7819	30.4142	26.7965	30.105	22.6767
F7	0.0586314	0.56281	24	11.1291	6.02076	0.113095	0.577886	24	12	4.93608	0.213343	1	24	11.9141	75.5053	0.041143	0.365458	24	11.6816	67.67	6.33999	0.0936899	61.6058	64.8612	61.7637	76.8118	74.2034	70.9359	67.2318	63.9462
Ddx19b	0.0588253	0.56281	24	11.069	2.67546	0.113095	0.577886	24	12	2.70078	0.212722	1	24	11.8644	29.5651	0.0411548	0.365458	24	11.645	25.6601	2.8041	0.109279	23.6134	22.7759	24.1357	28.5152	29.7886	27.3957	23.7468	25.3098
Klhl5	0.596778	0.796093	24	3.6263	1.43758	0.0138889	0.278415	24	4.5	4.08325	0.171264	1	24	3.15626	28.5771	0.0412479	0.366045	24	3.76016	24.5884	3.84384	0.156327	27.6133	29.0926	28.1135	25.681	25.0522	16.9767	22.2263	21.9513
Lclat1	0.254007	0.777665	24	7.29816	4.2771	0.0440476	0.413932	24	6	6.68946	0.127281	1	24	6.02448	38.5664	0.0413455	0.366473	24	6.43907	30.1034	8.28316	0.275157	28.0634	36.0768	40.0738	33.9811	31.2185	21.4039	25.1566	24.853
Ift172	0.488486	0.788912	24	3.85094	1.23116	0.0138889	0.278415	24	6	1.46666	0.209933	1	24	4.84888	17.8292	0.0413503	0.366473	24	4.89925	15.7011	3.32186	0.211568	16.2567	17.8972	17.7927	16.7447	15.8475	10.9516	14.3199	15.7985
Napa	0.0330114	0.504601	24	11.806	5.97782	0.249206	0.801565	24	12	6.13009	0.173512	1	24	12.2555	55.7933	0.0414174	0.366687	24	12.0205	48.2592	6.6148	0.137068	45.5291	43.3435	46.6587	51.5067	55.1983	56.0564	45.0608	42.7204
Yif1b	0.0716684	0.596991	24	12.0603	2.07043	0.113095	0.577886	24	15	1.96703	0.176173	1	24	14.3852	24.8914	0.0414285	0.366687	24	13.8293	22.118	2.99224	0.135285	20.4109	20.2595	21.9318	22.442	23.9203	25.9311	22.0052	20.0436
Trip12	0.376698	0.788912	24	1.97809	14.111	0.0138889	0.278415	24	4.5	13.6236	0.273497	1	24	4.60154	202.782	0.0414922	0.367011	24	3.70813	183.994	33.6356	0.182808	190.682	203.211	198.864	194.343	170.182	139.209	184.86	190.603
Atp6v1c1	0.0277831	0.4887	24	10.9457	3.77942	0.249206	0.801565	24	12	3.61759	0.207026	1	24	11.6248	36.1914	0.0415454	0.367017	24	11.5238	31.6288	3.91477	0.123772	30.327	28.8615	32.8708	33.8944	37.0868	33.7869	27.5617	28.6415
Thoc1	0.0261881	0.482512	24	22.5653	1.35706	0.249206	0.801565	24	3	1.50336	0.219647	1	24	7.73643e-05	21.5784	0.0415471	0.367017	24	0.490122	18.4482	1.41662	0.0767891	21.6713	19.4378	19.029	16.9472	17.6647	17.0766	17.1397	18.6196
Trmt5	0.0220943	0.47078	24	21.4096	0.950278	0.249206	0.801565	24	0	0.766708	0.260643	1	24	20.6093	6.39373	0.0415822	0.367067	24	21.9863	6.15451	0.950585	0.154453	7.62677	6.70182	5.45606	4.82966	5.77899	6.25807	6.10947	6.47523
Dis3l2	0.0987067	0.646862	24	8.51801	2.63145	0.113095	0.577886	24	9	3.87147	0.12866	1	24	8.22789	19.5563	0.0416069	0.367067	24	8.58186	15.8609	3.09782	0.195311	14.2246	17.8972	18.814	19.2319	18.2604	12.3164	12.4401	13.7028
Adgrv1	0.0758828	0.609326	24	12.1531	1.04879	0.113095	0.577886	24	15	1.14655	0.167682	1	24	13.3754	3.66372	0.0416665	0.367354	24	13.5063	2.44456	1.45995	0.597224	1.89061	1.00142	1.96203	3.44149	3.06823	4.06109	2.65389	1.47775
Parn	0.217074	0.766669	24	7.71733	1.20188	0.0440476	0.413932	24	9	1.67807	0.151002	1	24	6.12211	16.8433	0.0417687	0.368015	24	7.6157	14.7368	1.7299	0.117387	13.9031	16.2795	16.3951	16.7737	14.1794	14.1472	12.1913	14.0252
Cdip1	0.0640736	0.576451	24	11.3783	10.8946	0.113095	0.577886	24	15	10.4956	0.20157	1	24	11.8966	73.4151	0.0421283	0.370898	24	12.7257	58.1182	12.7306	0.219047	50.545	47.1438	49.3464	70.2758	76.6163	60.9164	57.2521	52.8497
Tbc1d17	0.0525842	0.546029	24	8.88271	3.74335	0.113095	0.577886	24	9	3.39651	0.245862	1	24	7.26839	27.7357	0.04216	0.370898	24	8.38768	23.4181	4.52355	0.193164	17.5943	23.5205	28.4898	26.4619	25.5884	21.8034	22.3922	21.4945
Lsm11	0.0588934	0.56281	24	22.1173	0.642469	0.113095	0.577886	24	22.5	0.770949	0.219733	1	24	20.0195	4.76556	0.0421897	0.370898	24	21.5554	4.03958	0.661296	0.163704	3.96129	4.49355	3.46715	3.23905	3.33633	4.19424	5.00368	4.62132
Slc43a3	0.0781968	0.61521	24	11.5026	2.64357	0.113095	0.577886	24	15	4.14632	0.165574	1	24	12.1605	30.1595	0.0422054	0.370898	24	12.8619	26.399	3.17086	0.120113	22.9317	21.1839	23.5444	30.1058	29.5801	28.927	27.7552	27.1637
Tk1	0.292078	0.788912	24	13.8519	3.31753	0.0440476	0.413932	24	16.5	7.90888	0.114433	1	24	15.4353	30.6771	0.0423744	0.372142	24	15.266	22.5624	7.44848	0.330128	17.2085	14.4564	18.5184	18.7691	29.5503	28.927	29.8286	23.241
Rpgr	0.0663573	0.580504	24	23.322	0.197953	0.113095	0.577886	24	1.5	0.223863	0.196498	1	24	7.73643e-05	2.51544	0.0424261	0.372175	24	0.270299	2.22836	0.220548	0.0989735	2.50796	2.388	2.15017	2.22685	1.96605	2.09712	2.04571	2.445
Tspan18	0.159928	0.716166	24	0.611323	0.567917	0.0440476	0.413932	24	3	0.645063	0.209383	1	24	3.47256	2.06242	0.042433	0.372175	24	2.37608	1.37253	0.957651	0.697728	1.44047	2.51639	1.66638	1.09896	0.65535	0.499314	1.43752	1.66583
Ypel3	0.162151	0.717138	24	8.8125	1.90575	0.0440476	0.413932	24	9	1.97729	0.206929	1	24	7.20965	15.3946	0.0424964	0.37249	24	8.3448	12.3262	2.32361	0.18851	11.2794	12.6847	14.8899	16.4555	11.3197	10.9516	11.1684	9.86061
Luzp1	0.0377066	0.5131	24	23.8381	3.21514	0.249206	0.801565	24	0	3.0158	0.157565	1	24	7.73643e-05	27.0516	0.0425523	0.372738	24	23.9461	24.3246	3.52721	0.145006	26.5972	27.6289	23.5175	23.6856	21.1499	20.139	23.7744	28.1041
Tmem120a	0.153833	0.712121	24	12.3118	4.31385	0.0440476	0.413932	24	15	4.1348	0.218748	1	24	14.5056	31.8905	0.042587	0.372801	24	13.9507	25.1175	6.551	0.260814	21.427	20.0541	25.157	22.6155	31.9334	32.9215	24.8802	21.9513
2310035C23Rik	0.0718641	0.598176	24	0.164392	5.74798	0.113095	0.577886	24	3	5.54991	0.182696	1	24	1.5096	37.8665	0.0426426	0.373047	24	1.55685	33.5042	8.07364	0.240974	36.7705	39.9028	34.134	31.7543	28.6269	23.3679	34.1688	39.3081
Ppm1a	0.0318693	0.502588	24	11.7953	15.7576	0.249206	0.801565	24	12	16.7072	0.187439	1	24	12.1586	105.064	0.042723	0.373509	24	11.9846	85.9577	17.3595	0.201954	81.0392	71.2549	84.233	94.6266	104.111	104.923	77.2945	70.1796
Fam172a	0.222746	0.770189	24	7.49671	1.67451	0.0440476	0.413932	24	7.5	2.24797	0.152129	1	24	6.16177	13.9734	0.0428068	0.374001	24	7.05487	10.7834	2.77342	0.257194	9.42735	12.2738	14.7018	12.4356	10.6941	8.25533	9.3439	9.13517
Dbndd2	0.0538824	0.549593	24	22.4877	0.189917	0.113095	0.577886	24	22.5	0.174443	0.245448	1	24	20.9999	1.04002	0.0428729	0.374294	24	21.9987	0.837288	0.190484	0.190484	0.951738	1.00142	0.725683	0.520562	0.834081	0.732328	0.884629	1.04786
Cwc22	0.0716777	0.596991	24	23.7641	1.57273	0.113095	0.577886	24	3	1.73195	0.184644	1	24	0.125143	14.5672	0.0428956	0.374294	24	0.938387	13.0642	1.94907	0.149191	14.2118	15.2011	13.116	11.6548	12.4516	10.4856	12.9377	14.4551
Marveld1	0.209956	0.761536	24	12.7764	5.91977	0.0440476	0.413932	24	15	9.27595	0.162347	1	24	12.5115	40.1759	0.0429928	0.374901	24	13.4182	30.3194	8.47379	0.279484	25.8641	19.5662	20.561	33.3738	43.1935	34.952	35.2746	29.7699
Ggnbp2	0.0483126	0.534374	24	22.3355	4.91286	0.113095	0.577886	24	1.5	5.17317	0.275783	1	24	7.73643e-05	77.154	0.0431082	0.375665	24	23.9468	68.3707	4.91966	0.0719556	77.1294	74.4133	71.2782	63.2193	59.5772	67.8402	67.9229	65.5852
Lrp5	0.0337864	0.504682	24	23.9408	17.449	0.249206	0.801565	24	0	17.5003	0.179161	1	24	2.54795	67.6282	0.0431428	0.375725	24	0.814532	56.5704	21.5379	0.380727	62.7118	72.0509	61.5487	45.231	38.9933	33.6538	63.2234	75.1502
Mbd3	0.221941	0.770189	24	12.5683	0.994138	0.0440476	0.413932	24	15	1.44762	0.154716	1	24	14.8088	20.1221	0.0432271	0.376217	24	14.1367	18.0401	1.60353	0.0888866	16.141	16.5363	17.0939	17.2364	19.8988	20.5718	18.4113	18.4316
Gins4	0.142744	0.704883	24	12.0547	2.0949	0.0440476	0.413932	24	15	1.59122	0.241404	1	24	14.2369	13.7791	0.0433396	0.376672	24	13.7757	10.9109	3.00265	0.275197	9.37591	8.16543	11.0196	11.1053	12.69	15.4122	10.0074	9.51133
Gcfc2	0.196418	0.751776	24	1.34143	0.496578	0.0440476	0.413932	24	3	0.658939	0.175616	1	24	4.05149	6.95072	0.0433722	0.376672	24	2.802	6.21394	0.980369	0.157769	6.2506	7.16401	6.71929	6.1889	5.36195	5.52575	5.99889	6.50209
Il18r1	0.0244445	0.482512	24	23.7698	0.137405	0.249206	0.801565	24	0	0.0984941	0.249485	1	24	2.84501	0.347389	0.0433809	0.376672	24	0.84882	0.293127	0.168408	0.168408	0.321533	0.333807	0.349403	0.173521	0.119154	0.233013	0.304091	0.510495
Sord	0.18475	0.738605	24	13.1728	254.804	0.0440476	0.413932	24	15	295.182	0.186846	1	24	13.6389	1586.3	0.043396	0.376672	24	13.9344	1188.21	415.212	0.349442	1135.72	773.302	937.421	1227.83	1516.09	1692.04	1178.27	1045.04
Asic5	0.027647	0.4887	24	11.2788	0.932138	0.249206	0.801565	24	12	0.878816	0.221044	1	24	13.8784	4.6217	0.0434473	0.376672	24	12.3782	3.77073	1.04533	0.277222	3.20247	3.38942	4.40785	3.99097	4.55766	4.82671	3.37265	2.41813
Cyc1	0.16191	0.717138	24	12.6825	20.5678	0.0440476	0.413932	24	15	13.4099	0.213706	1	24	13.7431	141.197	0.0434714	0.376672	24	13.8075	108.652	31.6074	0.290906	95.8683	88.5872	92.753	106.918	136.432	151.891	101.649	95.1133
Mvk	0.556079	0.791323	24	2.7643	1.85274	0.0138889	0.278415	24	6	3.45096	0.197352	1	24	3.59733	19.805	0.0434739	0.376672	24	4.10453	14.7591	4.87876	0.330559	15.5365	23.8544	16.0188	15.9639	12.3027	10.7519	10.5603	13.0848
Rps5	0.141531	0.704883	24	12.1438	19.6832	0.0440476	0.413932	24	15	18.7066	0.244921	1	24	12.7768	161.774	0.0435295	0.376718	24	13.2944	133.457	26.4832	0.19844	120.099	114.984	121.001	142.316	152.13	174.86	120.254	122.008
Coq10b	0.0308513	0.499907	24	10.9265	28.0557	0.249206	0.801565	24	12	25.7286	0.198627	1	24	10.7078	68.9238	0.0435348	0.376718	24	11.2101	35.7263	28.6141	0.800926	23.5234	10.271	29.8068	80.34	58.2963	48.7331	20.7611	14.0789
Sigmar1	0.0393537	0.51547	24	23.7137	20.4204	0.249206	0.801565	24	1.5	22.9904	0.157184	1	24	2.63826	82.9192	0.0438376	0.379091	24	1.28945	64.5136	26.3257	0.408065	74.1327	89.5116	76.6267	40.2568	41.7636	49.4654	63.721	80.6313
Ccng2	0.105279	0.659033	24	22.5791	3.7716	0.0440476	0.413932	24	22.5	3.8933	0.332703	1	24	0.825868	13.3496	0.043865	0.379091	24	23.2913	12.5857	3.81109	0.302811	13.2086	13.0698	12.7398	7.66383	8.9068	9.85314	19.8212	15.4223
Haus6	0.440281	0.788912	24	6.75592	0.424316	0.0138889	0.278415	24	6	0.506432	0.253461	1	24	5.66857	6.3144	0.0440132	0.380129	24	6.14102	5.27457	0.905577	0.171687	4.96447	5.70039	6.79992	5.37914	4.88533	4.95986	4.6443	4.86314
Hist1h4m	0.0305012	0.499785	24	10.6128	1.50567	0.249206	0.801565	24	12	1.41564	0.20416	1	24	10.9285	6.12922	0.0440534	0.380234	24	11.1791	4.51039	1.52007	0.337016	2.62371	2.49071	4.38097	6.73838	5.2428	6.02506	4.20199	4.37951
Rps29	0.358724	0.788912	24	12.7756	15.5953	0.0138889	0.278415	24	15	11.7652	0.312596	1	24	14.7234	133.774	0.0441705	0.380462	24	14.1739	105.49	25.8896	0.245421	90.4923	81.5002	96.8384	105.038	112.482	156.984	99.1338	101.454
Mtfr1l	0.0283197	0.49079	24	10.8466	5.31744	0.249206	0.801565	24	10.5	5.05584	0.220725	1	24	11.4356	58.9464	0.0441771	0.380462	24	10.9272	52.803	5.35968	0.101503	51.4968	49.9426	55.5551	55.3531	61.1858	54.392	46.9959	47.5029
Slc25a10	0.105443	0.659326	24	10.6812	22.0084	0.0440476	0.413932	24	10.5	16.2729	0.335451	1	24	11.5357	124.363	0.0441824	0.380462	24	10.905	101.133	22.1318	0.218838	85.5793	91.8226	118.394	98.2127	146.232	100.961	87.6612	80.2014
Gatsl2	0.0654345	0.57728	24	23.4238	1.02465	0.113095	0.577886	24	1.5	0.935368	0.210595	1	24	0.664738	3.18907	0.0441921	0.380462	24	0.531186	2.31646	1.17902	0.508977	2.84235	4.03136	1.74701	1.85089	1.22133	1.23164	2.57095	3.0361
Gbe1	0.161688	0.717138	24	13.2571	21.8429	0.0440476	0.413932	24	15	27.8205	0.219557	1	24	14.5106	159.451	0.0443008	0.381109	24	14.2581	128.794	38.4194	0.298302	129.539	92.4902	115.733	133.235	154.573	157.717	144.803	102.26
Qpctl	0.436859	0.788912	24	19.0293	0.385336	0.0138889	0.278415	24	18	0.406689	0.25795	1	24	17.0586	9.87894	0.0443306	0.381109	24	18.029	9.26916	0.830014	0.0895457	9.26016	9.32092	7.875	9.05199	9.32384	9.88643	9.89679	9.5382
Gm14085	0.0219503	0.470647	24	23.4353	0.118254	0.249206	0.801565	24	0	0.0802093	0.286301	1	24	7.73643e-05	0.236836	0.0443516	0.381109	24	23.8119	0.203789	0.127049	0.127049	0.244365	0.179742	0.161263	0.173521	0.0595772	0.133151	0.248802	0.429891
Lims1	0.0680201	0.586421	24	23.1315	1.91822	0.113095	0.577886	24	0	1.98918	0.204007	1	24	1.84327	25.5105	0.0444196	0.381435	24	0.317968	23.1809	2.11519	0.0912475	24.8095	26.5505	23.7594	21.4298	20.1371	21.9033	23.885	22.9723
Irak1bp1	0.030625	0.499907	24	10.6362	0.20985	0.249206	0.801565	24	15	0.216283	0.205981	1	24	14.7821	1.03315	0.0444751	0.381435	24	13.545	0.842237	0.227655	0.227655	0.463008	0.590581	0.967577	0.983283	0.953236	1.03192	1.02285	0.72544
Zfp655	0.231875	0.773585	24	8.09398	6.00536	0.0440476	0.413932	24	7.5	8.27573	0.154017	1	24	6.12543	53.8225	0.0444964	0.381435	24	7.24269	41.4612	9.27947	0.223811	40.1145	44.7044	58.2159	48.2676	39.4401	33.8202	35.7446	31.382
Ikbke	0.307018	0.788912	24	1.85893	1.15999	0.0440476	0.413932	24	4.5	2.77596	0.116342	1	24	2.1313	25.0059	0.0445022	0.381435	24	2.81665	22.3845	2.40105	0.107264	24.6166	25.6004	23.5713	23.5988	20.5244	19.8394	19.1854	22.1394
Ints4	0.21838	0.767189	24	7.54638	2.11817	0.0440476	0.413932	24	7.5	3.08472	0.163832	1	24	6.88298	23.4608	0.0445558	0.381654	24	7.31001	19.9188	3.29023	0.165182	18.3017	21.7488	23.6519	22.6155	20.7627	15.8116	18.1073	18.351
Slc25a21	0.0470881	0.534374	24	10.8802	1.07625	0.113095	0.577886	24	9	0.784091	0.296393	1	24	11.5086	9.00818	0.0446081	0.38186	24	10.4704	7.81129	1.07011	0.136995	7.72966	8.47356	7.55248	9.45687	8.48976	8.3552	6.44121	5.9916
St7	0.192544	0.747655	24	13.2974	1.70039	0.0440476	0.413932	24	15	1.73464	0.187011	1	24	14.4084	11.8459	0.0447668	0.382266	24	14.2367	8.86851	2.98508	0.336593	7.87113	7.31807	6.96118	8.18439	11.6176	12.1833	9.31625	7.49622
Spryd3	0.168439	0.725101	24	21.1564	1.64659	0.0440476	0.413932	24	21	1.64897	0.213906	1	24	18.6256	15.5858	0.0447872	0.382266	24	20.2735	13.2007	1.99611	0.151213	13.6073	11.7603	12.041	11.2499	11.558	13.5148	17.5267	14.3476
Mapk8	0.00950901	0.391661	24	11.5885	1.11165	0.488095	1	24	12	0.812	0.342052	1	24	11.6634	23.704	0.0447981	0.382266	24	11.7506	22.5293	1.19074	0.0528529	22.8932	22.6732	22.5768	23.541	23.6224	23.1349	21.5076	20.2855
Camkmt	0.586353	0.793878	24	3.87296	0.0766843	0.0138889	0.278415	24	6	0.138334	0.195018	1	24	3.82389	0.87732	0.044811	0.382266	24	4.55697	0.648435	0.215706	0.215706	0.643066	1.0271	0.779437	0.636242	0.595772	0.499314	0.442315	0.564231
Chuk	0.0783666	0.61521	24	9.342	17.5554	0.113095	0.577886	24	9	21.2648	0.179372	1	24	8.93852	176.809	0.0448436	0.382266	24	9.09346	150.103	19.1303	0.127448	145.564	148.133	161.908	179.652	168.276	131.619	129.101	136.571
Eef2	0.107692	0.660459	24	10.4349	64.8159	0.0440476	0.413932	24	13.5	61.9171	0.335179	1	24	9.4454	1177.79	0.0448475	0.382266	24	11.0926	1091.83	64.8646	0.0594089	1024.65	1026.12	1065.76	1220.02	1147.28	1073.16	1117.59	1060.08
Deptor	0.107978	0.660459	24	10.3854	24.7918	0.0440476	0.413932	24	10.5	11.489	0.33452	1	24	9.46242	206.674	0.0448702	0.382266	24	10.1167	173.045	24.893	0.143853	157.165	159.611	162.714	223.61	196.575	161.478	169.517	153.686
Gapdh	0.185218	0.739726	24	13.027	26.5381	0.0440476	0.413932	24	15	29.1665	0.195083	1	24	14.308	457.509	0.0448812	0.382266	24	14.1139	415.013	44.5211	0.107276	405.659	372.426	398.803	411.649	448.229	471.486	413.233	398.616
Dhdh	0.0345609	0.506856	24	10.0766	13.7972	0.249206	0.801565	24	12	13.087	0.185318	1	24	9.0305	135.885	0.0449754	0.382827	24	10.3615	118.103	13.7706	0.116599	111.881	112.904	130.3	131.5	136.223	107.519	113.15	101.347
Tmcc2	0.0571156	0.55923	24	22.5677	0.319276	0.113095	0.577886	24	1.5	0.2505	0.248294	1	24	7.73643e-05	3.82173	0.045136	0.383784	24	0.0220346	3.32733	0.328584	0.098753	3.76837	3.59484	2.98336	3.23905	3.15759	2.92931	3.37265	3.57346
Syne3	0.0602209	0.566318	24	9.42489	2.41985	0.113095	0.577886	24	12	1.96547	0.235693	1	24	8.85412	11.1289	0.0451646	0.383784	24	10.0741	7.74747	2.40435	0.31034	5.58182	6.21394	9.9983	11.9151	8.48976	6.49109	7.29819	5.9916
Sirt5	0.0921261	0.635516	24	9.11017	1.45917	0.113095	0.577886	24	9	2.14239	0.154116	1	24	6.29007	11.2887	0.0451749	0.383784	24	8.15205	9.46111	1.80362	0.190635	8.37272	10.9643	11.7722	9.94851	11.0218	8.6215	7.49171	7.49622
Shroom1	0.583284	0.793878	24	4.11825	2.22137	0.0138889	0.278415	24	6	3.42528	0.198401	1	24	4.10951	40.5102	0.0452068	0.383784	24	4.73679	33.2982	6.22516	0.186952	32.6806	42.8557	39.7782	31.87	30.5631	30.1586	28.2529	30.2267
Plekha1	0.0650458	0.577234	24	20.8588	3.20207	0.113095	0.577886	24	21	3.6103	0.218636	1	24	17.6968	17.7557	0.0452294	0.383784	24	19.8821	15.0748	4.1895	0.277914	18.5332	15.047	12.471	11.4234	11.7963	16.9101	19.1025	15.3148
Fbxl4	0.0564813	0.558602	24	10.8869	1.96049	0.113095	0.577886	24	10.5	1.54291	0.253927	1	24	11.8197	18.0307	0.0455115	0.385601	24	11.068	15.7303	1.98665	0.126294	14.3661	14.8929	16.5563	15.8482	19.452	16.4108	14.237	14.0789
Dagla	0.02063	0.461315	24	23.8274	0.217784	0.249206	0.801565	24	0	0.182516	0.315511	1	24	3.16852	1.08812	0.0455127	0.385601	24	0.967796	1.04734	0.272348	0.260039	1.01604	1.15549	0.994454	0.954363	0.774504	0.898766	1.16108	1.42401
Zmat3	0.15002	0.707537	24	21.473	0.580058	0.0440476	0.413932	24	21	0.487155	0.24571	1	24	20.9999	6.27179	0.0455451	0.385601	24	21.1575	5.39466	0.626358	0.116107	5.51751	5.70039	4.05845	4.82966	5.42153	5.42588	5.9436	6.26028
Gas7	0.211987	0.76346	24	1.30506	3.07963	0.0440476	0.413932	24	3	4.1596	0.173948	1	24	3.70148	12.3065	0.0455573	0.385601	24	2.67432	7.6692	5.91848	0.771721	8.06405	13.9429	11.6109	5.40806	4.55766	2.36342	6.13712	9.26951
Fam208b	0.0711389	0.595615	24	23.8445	2.49889	0.113095	0.577886	24	3	2.20425	0.202317	1	24	0.527785	30.8164	0.0456294	0.38597	24	1.10693	28.8963	3.18857	0.110345	30.5842	31.1981	29.1886	28.0814	26.4821	24.4664	30.2709	30.8984
Mid1	0.174364	0.728353	24	0.378102	0.520339	0.0440476	0.413932	24	3	0.52333	0.212395	1	24	0.224139	2.29211	0.045702	0.386343	24	1.18352	1.73697	0.698467	0.402118	2.17356	2.59342	1.61263	1.90873	1.22133	0.632465	1.63104	2.12258
Pabpc4	0.0311727	0.499907	24	11.3446	5.62839	0.249206	0.801565	24	12	5.97373	0.211089	1	24	11.7565	38.3179	0.0458783	0.387425	24	11.7004	30.9358	5.9753	0.193152	29.6582	26.4735	29.1886	36.8442	38.338	34.3861	26.4283	26.1696
Carf	0.24665	0.777332	24	0.77226	0.235459	0.0440476	0.413932	24	3	0.422127	0.150976	1	24	7.73643e-05	7.37986	0.0458872	0.387425	24	1.24478	6.89094	0.325359	0.0472155	7.33096	7.42078	6.98806	6.9119	6.70244	6.4578	6.30298	7.01259
Trim8	0.0600219	0.566209	24	10.7594	2.34595	0.113095	0.577886	24	13.5	2.18574	0.242106	1	24	11.5166	24.6167	0.045953	0.387739	24	11.9165	21.5676	2.44823	0.113514	19.6007	19.7973	20.0235	25.5943	23.7117	22.8353	20.2359	20.7422
Glo1	0.0298892	0.496417	24	22.5468	34.0391	0.249206	0.801565	24	3	36.4829	0.22127	1	24	7.73643e-05	361.86	0.0460492	0.387861	24	0.484052	294.867	35.4318	0.120162	365.197	316.141	321.397	246.891	269.617	265.103	279.847	294.744
Maff	0.0332764	0.504601	24	9.72975	2.83776	0.249206	0.801565	24	12	2.60222	0.19875	1	24	9.03739	7.31465	0.0460497	0.387861	24	10.2424	3.45807	2.82057	0.81565	1.20896	1.38658	5.2948	8.21331	5.06407	2.39671	2.48802	1.61209
Akap12	0.178421	0.732461	24	1.28837	1.30667	0.0440476	0.413932	24	3	1.69622	0.20996	1	24	3.71675	7.40917	0.0460889	0.387861	24	2.67401	5.90421	2.50691	0.424596	5.90335	8.29382	6.69241	5.52374	4.52787	4.09438	4.78253	7.41561
Kif5c	0.0216203	0.466996	24	23.6844	0.122144	0.249206	0.801565	24	0	0.0930911	0.306319	1	24	7.73643e-05	0.280572	0.0460958	0.387861	24	23.8948	0.260189	0.132987	0.132987	0.282949	0.256775	0.241894	0.202441	0.148943	0.133151	0.331736	0.483627
Phlpp2	0.292813	0.788912	24	19.573	0.331878	0.0440476	0.413932	24	18	0.964429	0.128017	1	24	19.2588	5.83448	0.0461105	0.387861	24	18.9461	4.89639	0.562724	0.114926	4.45002	4.23678	3.84343	4.51154	4.79597	5.89191	5.58422	5.85726
C87436	0.0704524	0.591506	24	11.4772	1.21691	0.113095	0.577886	24	15	1.31348	0.20775	1	24	12.0132	11.9778	0.0461963	0.388104	24	12.801	10.5135	1.44659	0.137594	9.64599	9.24388	9.70265	12.3778	11.1707	11.9835	10.2838	9.6994
Rbm12b2	0.0377129	0.5131	24	21.0827	6.43893	0.249206	0.801565	24	21	6.39158	0.176162	1	24	18.8	27.9604	0.0462026	0.388104	24	20.304	23.5527	7.80669	0.331456	31.4202	22.5962	16.7445	18.8848	16.9795	25.4318	30.4368	25.9278
Rbm4b	0.488805	0.788912	24	15.3494	0.932126	0.0138889	0.278415	24	16.5	0.970323	0.244074	1	24	15.8486	20.6812	0.0462311	0.388104	24	15.8992	18.2631	2.52299	0.138147	17.3628	17.358	16.7445	17.5545	18.1115	21.4372	20.153	17.3837
Fam47e	0.187248	0.741572	24	13.3107	6.88544	0.0440476	0.413932	24	15	8.17085	0.201039	1	24	13.2963	34.2952	0.046254	0.388104	24	13.8648	23.3858	11.1124	0.475178	22.7131	13.4036	15.5081	23.3096	35.1506	34.253	23.9679	18.7808
Jmjd1c	0.0198637	0.453111	24	23.0113	15.1574	0.488095	1	24	1.5	13.8644	0.171242	1	24	7.73643e-05	84.3919	0.0462975	0.388228	24	0.167367	72.9983	16.3715	0.224272	82.7626	84.3504	68.483	64.434	55.9132	57.3546	86.8595	83.8286
AU022252	0.0647959	0.57668	24	23.2826	8.80424	0.113095	0.577886	24	1.5	7.84303	0.226777	1	24	1.91321	66.7394	0.0463302	0.388262	24	0.910265	59.9066	10.3624	0.172976	64.8854	68.944	61.6562	54.1673	47.1554	50.4973	68.7799	63.167
Mrpl14	0.156647	0.715925	24	12.1344	3.38957	0.0440476	0.413932	24	15	2.15985	0.241461	1	24	13.0865	25.6893	0.0464164	0.388536	24	13.3993	20.4839	4.63227	0.226143	17.5428	17.5377	18.7334	20.1284	25.4395	27.3291	18.2178	18.9421
Pnkp	0.0588422	0.56281	24	22.7317	2.83691	0.113095	0.577886	24	22.5	2.52382	0.250383	1	24	20.9999	23.5778	0.0464202	0.388536	24	22.0807	21.0682	2.8178	0.133746	22.8289	24.1111	20.3191	16.7447	18.886	21.5704	19.9042	24.1813
Pkd2	0.0358217	0.507372	24	23.0299	3.32322	0.249206	0.801565	24	3	3.13804	0.186947	1	24	7.73643e-05	28.8295	0.046474	0.388747	24	0.644769	25.5892	3.71572	0.145206	28.3849	28.8101	25.0226	23.3096	22.5202	21.1376	28.4187	27.11
Rps28	0.35124	0.788912	24	13.0284	7.83444	0.0138889	0.278415	24	15	6.27425	0.343624	1	24	14.4938	84.393	0.046626	0.389777	24	14.1776	70.9743	13.3169	0.18763	66.1458	60.5731	64.1557	72.6473	74.1737	95.6687	67.2595	67.1704
3110043O21Rik	0.204093	0.757717	24	11.9351	0.566879	0.0440476	0.413932	24	15	0.826779	0.187357	1	24	14.7529	12.6043	0.046789	0.390899	24	13.9183	11.776	0.814605	0.069175	10.9064	9.98853	11.6109	11.8572	12.8985	12.2498	12.606	12.0907
Ifi203	0.0537874	0.549593	24	23.6424	2.00688	0.113095	0.577886	24	0	1.5397	0.277329	1	24	6.55178e-05	10.4258	0.0468445	0.391019	24	23.8809	9.2976	2.18034	0.234505	10.4691	9.83446	8.62756	9.48579	6.22582	7.95574	9.28861	12.4937
Dnajc4	0.0472724	0.534374	24	11.1286	0.654258	0.113095	0.577886	24	9	0.455307	0.315703	1	24	9.17018	6.6745	0.0468611	0.391019	24	9.75897	5.89351	0.627823	0.106528	6.10913	5.28956	6.36988	6.7673	6.2854	5.95849	5.63951	4.7288
Casp6	0.237307	0.777332	24	7.11772	2.7049	0.0440476	0.413932	24	6	3.18917	0.161674	1	24	6.06528	14.7183	0.0469041	0.391029	24	6.39325	9.47162	5.34725	0.564555	6.76506	12.3252	15.7769	11.7994	8.78764	6.22479	6.27534	7.81863
Ube3c	0.102063	0.654116	24	11.0248	3.66972	0.0440476	0.413932	24	9	3.0188	0.376277	1	24	11.4497	65.6476	0.046938	0.391029	24	10.5005	61.023	3.63521	0.0595711	60.5768	60.9326	60.9574	63.1037	68.9011	59.252	58.4132	56.047
Slc2a8	0.0345277	0.506856	24	9.6415	2.57583	0.249206	0.801565	24	12	2.55163	0.196764	1	24	9.0342	13.4456	0.0469675	0.391029	24	10.2105	10.4457	2.55683	0.244774	7.69107	9.73176	12.8742	12.32	13.8815	8.82122	9.64799	8.59781
Xkr6	0.0510063	0.541919	24	23.3615	0.680228	0.113095	0.577886	24	0	0.760357	0.293584	1	24	2.52855	3.13177	0.0469777	0.391029	24	0.611818	2.8993	0.784868	0.270709	2.85521	3.59484	2.55333	2.54497	1.99584	2.43	3.56616	3.65407
Zbtb2	0.106584	0.660459	24	11.2722	0.818123	0.0440476	0.413932	24	10.5	0.802909	0.36106	1	24	11.5866	5.97607	0.0470088	0.391048	24	11.1201	5.16286	0.831603	0.161074	4.79727	4.87872	4.83789	6.6227	5.21301	6.05835	4.83782	4.05709
Crym	0.058852	0.56281	24	10.5243	0.272834	0.113095	0.577886	24	10.5	0.275917	0.25602	1	24	11.1635	0.87522	0.0471908	0.392321	24	10.729	0.513383	0.27308	0.27308	0.424424	0.385162	0.456911	0.925443	0.834081	0.56589	0.165868	0.349286
Cry2	0.0610755	0.567358	24	10.6666	5.287	0.113095	0.577886	24	12	4.63402	0.24741	1	24	9.29441	29.2623	0.0472905	0.392908	24	10.6539	23.7554	5.29255	0.222794	17.2856	19.3351	24.1357	31.87	26.0948	24.8326	28.004	18.4853
Gstt2	0.0643892	0.57668	24	11.5165	13.3813	0.113095	0.577886	24	13.5	8.94278	0.235398	1	24	13.6929	54.2613	0.047397	0.393506	24	12.9108	39.9132	16.1585	0.40484	32.0761	25.8058	48.3251	38.5505	58.8921	53.6597	35.7998	26.1965
Exph5	0.0674067	0.58366	24	23.5383	7.30881	0.113095	0.577886	24	1.5	4.9189	0.225013	1	24	0.773282	42.1323	0.0474206	0.393506	24	0.605745	36.9075	8.55087	0.231684	41.9922	41.9056	38.1387	35.2247	26.1842	26.9297	43.3468	41.5382
Wars2	0.0782333	0.61521	24	9.21268	0.786537	0.113095	0.577886	24	9	0.838223	0.195426	1	24	8.94936	5.78242	0.0476988	0.395573	24	9.054	4.59686	0.862472	0.187622	4.23138	4.33949	5.18729	5.8997	5.33216	3.86137	3.73203	4.19143
Ttl	0.0528045	0.546568	24	11.9246	1.17447	0.113095	0.577886	24	12	0.688698	0.289858	1	24	12.0542	6.68935	0.0477375	0.395652	24	11.993	5.36947	1.29668	0.241491	5.18311	4.6733	5.16041	5.84186	7.35779	5.69218	5.47364	3.57346
Hdac5	0.0562639	0.55815	24	22.7139	5.88958	0.113095	0.577886	24	22.5	6.32636	0.272423	1	24	1.18688	31.8301	0.0477873	0.395823	24	23.4521	30.723	6.0181	0.195882	30.8029	33.6631	28.7854	24.1483	24.9033	26.8964	40.5547	36.0302
Stx1b	0.0670819	0.582981	24	23.0965	1.3852	0.113095	0.577886	24	0	1.38203	0.228973	1	24	0.420646	3.57564	0.0478613	0.396193	24	23.8399	2.28927	1.47209	0.643041	3.07386	4.6733	1.72014	0.809763	1.37028	0.865478	2.79211	3.00923
Ing5	0.170969	0.726278	24	8.82064	0.983193	0.0440476	0.413932	24	9	0.842036	0.232251	1	24	6.81747	12.2172	0.0481013	0.397937	24	8.22053	10.8605	1.22207	0.112525	10.4048	10.5278	13.0354	11.6259	11.1112	10.8185	9.15039	10.2099
Ppp1r37	0.0325552	0.504601	24	9.55412	4.7829	0.249206	0.801565	24	12	4.8859	0.215967	1	24	8.99659	55.2773	0.0481637	0.39821	24	10.1674	49.0927	4.74473	0.0966485	44.2558	45.0639	54.3993	54.6301	52.6961	47.1686	48.0188	46.5088
Btbd19	0.116062	0.672982	24	9.59529	0.71655	0.0440476	0.413932	24	10.5	0.429844	0.343222	1	24	9.10667	2.41573	0.048214	0.398383	24	9.73322	1.38631	0.73509	0.530249	0.835986	0.924388	1.47824	3.00769	1.63837	1.16507	0.912274	1.12846
B4galt1	0.17214	0.726842	24	11.6327	2.38662	0.0440476	0.413932	24	15	2.96966	0.231772	1	24	12.1594	41.3521	0.0482693	0.398597	24	12.9056	37.639	2.91233	0.0773753	34.7384	34.074	35.0478	39.0132	43.4616	37.8813	39.1725	37.7229
Aqp9	0.0682807	0.586729	24	9.90817	48.1088	0.113095	0.577886	24	9	43.0177	0.228122	1	24	9.2	368.033	0.0483545	0.398823	24	9.36901	298.146	50.4221	0.169119	288.672	266.301	325.751	367.372	359.757	265.735	246.203	265.377
Arntl2	0.0547511	0.553268	24	0.291281	0.262913	0.113095	0.577886	24	3	0.21311	0.284502	1	24	2.69209	0.931923	0.0483555	0.398823	24	2.00864	0.818096	0.401835	0.401835	0.87457	0.975743	0.860069	0.694082	0.565984	0.56589	0.718761	1.28967
Dhx9	0.0386589	0.51547	24	11.8052	5.36336	0.249206	0.801565	24	13.5	5.22154	0.184063	1	24	12.5612	62.1831	0.0485886	0.400501	24	12.6216	55.414	6.39837	0.115465	51.2009	54.3592	52.3298	58.0716	61.871	62.0481	54.1283	49.3031
Syngr2	0.0689493	0.589624	24	11.1225	4.80963	0.113095	0.577886	24	13.5	3.58375	0.227634	1	24	12.0027	46.9072	0.0486244	0.400553	24	12.205	40.1479	5.25463	0.130882	35.986	35.6403	39.7782	41.4714	48.8235	44.5056	35.9657	39.0126
Gm5096	0.0837129	0.624058	24	23.7001	64.4709	0.113095	0.577886	24	3	68.1721	0.188597	1	24	1.30925	321.094	0.0488348	0.402041	24	1.33557	254.524	83.454	0.327882	293.573	378.511	247.324	191.393	212.542	181.784	229.23	301.837
Fastkd1	0.0940264	0.636435	24	12.2681	2.67918	0.113095	0.577886	24	15	2.84214	0.168196	1	24	12.2767	26.5244	0.0488957	0.402298	24	13.1637	22.561	3.56089	0.157834	21.3112	19.0783	19.9697	24.0904	27.4651	24.6994	22.8898	20.984
Txnrd3	0.0486875	0.535749	24	9.13673	1.74488	0.249206	0.801565	24	9	2.28879	0.147799	1	24	8.76836	9.57475	0.0489894	0.402825	24	8.96837	7.23733	1.93489	0.267348	5.92907	7.42078	9.0576	9.19659	9.14511	5.45917	5.83302	5.85726
Ahcy	0.288931	0.788912	24	14.5677	187.828	0.0440476	0.413932	24	16.5	279.481	0.141618	1	24	14.8592	1790.2	0.0491703	0.404067	24	15.3044	1417.53	448.16	0.316156	1375.2	1092.45	1107.53	1304.27	1703.28	1833.95	1569.44	1354.1
Frmd8	0.0618152	0.568498	24	10.7589	5.48107	0.113095	0.577886	24	10.5	3.06144	0.258415	1	24	11.4263	23.3909	0.049255	0.404518	24	10.8947	16.2418	5.51577	0.339603	12.4755	14.7132	12.4441	24.8134	23.4139	16.2777	13.5182	12.2787
Smarca1	0.0470461	0.534374	24	0.220134	0.13645	0.249206	0.801565	24	1.5	0.15716	0.154354	1	24	2.70357	0.322733	0.0493168	0.404572	24	1.47503	0.21379	0.190185	0.190185	0.295811	0.308129	0.322526	0.11568	0.0595772	0.0665753	0.165868	0.376154
Clybl	0.0362224	0.508653	24	11.892	2.7581	0.249206	0.801565	24	12	2.84901	0.200501	1	24	12.2241	21.7694	0.0493213	0.404572	24	12.0387	18.2857	3.0621	0.167459	17.3499	16.3309	17.3626	19.897	21.4478	21.8034	16.725	15.3686
Meis3	0.498955	0.788912	24	3.48901	0.101195	0.0138889	0.278415	24	6	0.105732	0.261982	1	24	5.06352	0.685655	0.0494332	0.404965	24	4.85475	0.528549	0.266827	0.266827	0.57876	0.667614	0.698806	0.607322	0.536195	0.133151	0.442315	0.564231
Slc2a5	0.0802594	0.620085	24	8.89858	2.0508	0.113095	0.577886	24	9	1.57595	0.200097	1	24	8.27117	7.17416	0.0494482	0.404965	24	8.7235	4.2596	2.35697	0.553331	2.57227	3.31239	7.57936	7.02758	4.76618	2.92931	3.06856	2.82116
Vps54	0.162689	0.717737	24	23.5084	3.20854	0.0440476	0.413932	24	1.5	2.64885	0.253529	1	24	6.37475e-05	56.6228	0.0494589	0.404965	24	0.332388	51.2152	3.63815	0.0710365	56.8342	53.3321	51.7654	51.4199	48.4363	43.5069	52.2761	52.1511
Slc44a1	0.0361177	0.508236	24	23.7038	16.812	0.249206	0.801565	24	0	17.1046	0.202393	1	24	2.94988	75.5072	0.0495562	0.405517	24	0.858501	64.3589	20.5236	0.318894	67.6892	80.961	71.4663	45.231	47.2745	49.6984	71.4891	81.0612
Rad51c	0.230598	0.773026	24	19.6436	0.508782	0.0440476	0.413932	24	19.5	0.737448	0.179557	1	24	17.1346	1.65298	0.0495983	0.405616	24	18.772	0.870383	0.894793	0.894793	1.22183	0.385162	0.18814	0.202441	0.446829	1.89739	1.49281	1.12846
Afp	0.468816	0.788912	24	6.41172	0.131198	0.0138889	0.278415	24	6	0.123301	0.28045	1	24	5.59052	1.14081	0.0496439	0.405745	24	6.00074	0.836112	0.293121	0.293121	0.733096	0.975743	1.31698	0.809763	0.804293	0.632465	0.691117	0.72544
Adamts1	0.0568073	0.558602	24	22.9788	1.70933	0.113095	0.577886	24	22.5	1.39677	0.28451	1	24	2.05756	13.5072	0.049679	0.405787	24	23.814	12.906	1.80192	0.139618	13.4272	12.9671	13.9761	10.1799	10.9324	12.7825	14.0711	14.9118
Wee1	0.0433625	0.52663	24	11.5313	4.40461	0.249206	0.801565	24	13.5	4.67869	0.169679	1	24	11.9008	11.9282	0.0497926	0.406469	24	12.3063	6.40119	4.98704	0.77908	3.96129	1.2582	3.52091	12.4067	10.992	9.52026	6.16476	3.38539
Prr3	0.0731616	0.600492	24	9.36815	0.809827	0.113095	0.577886	24	9	0.664368	0.222264	1	24	9.00796	4.62258	0.0499012	0.406996	24	9.12533	3.50102	0.879095	0.251097	2.8938	3.44078	3.68217	5.08994	4.05125	2.99589	2.76447	3.08984
Trps1	0.0488494	0.535749	24	0.245174	0.857527	0.113095	0.577886	24	3	0.637532	0.333091	1	24	2.69094	3.09593	0.0499239	0.406996	24	1.99369	2.83933	1.30001	0.45786	2.93238	3.23536	2.87585	2.45821	2.0852	1.93068	2.73682	4.46011
Sec14l2	0.0578952	0.560385	24	21.8334	64.667	0.113095	0.577886	24	0	43.3082	0.281227	1	24	19.3451	497.761	0.0499472	0.406996	24	21.7335	469.696	66.3597	0.141282	554.092	475.701	489.97	349.181	430.535	464.895	500.811	492.386
Lrrc8d	0.19592	0.751776	24	0.859621	6.63034	0.0440476	0.413932	24	3	6.82707	0.213606	1	24	3.4542	33.7478	0.0499868	0.407074	24	2.44859	25.5539	11.6656	0.456511	26.7001	38.7473	30.0218	21.9793	19.6307	12.3497	25.9307	29.0713
Gpr146	0.0521592	0.544663	24	8.76474	31.3215	0.249206	0.801565	24	9	33.5724	0.142063	1	24	8.21804	115.773	0.0500505	0.407136	24	8.66111	72.6076	36.3829	0.50109	44.2172	74.0281	113.556	115.247	87.1019	45.6706	50.3133	50.7271
Gfer	0.0333962	0.504601	24	21.4408	4.56983	0.249206	0.801565	24	0	3.45499	0.221902	1	24	19.0947	28.8302	0.0500545	0.407136	24	21.5064	26.5508	4.77458	0.179828	32.3591	27.6546	24.1626	19.9838	22.8181	29.4596	26.8706	29.0982
Apool	0.0321003	0.504046	24	11.5739	2.01554	0.249206	0.801565	24	12	2.11208	0.231751	1	24	11.4616	16.926	0.0501955	0.408038	24	11.6784	14.984	2.1433	0.143039	14.7777	12.7103	15.8038	16.5423	16.5923	16.8768	14.2094	12.3594
Nkain2	0.106652	0.660459	24	8.93059	0.0677913	0.113095	0.577886	24	9	0.103772	0.153874	1	24	6.08873	0.316274	0.0502365	0.408127	24	8.02755	0.211049	0.0863184	0.0863184	0.141475	0.308129	0.295649	0.289201	0.20852	0.199726	0.138223	0.107473
Rdh13	0.0928582	0.635516	24	12.3414	3.07238	0.113095	0.577886	24	15	3.32444	0.176926	1	24	12.5125	14.5986	0.0502771	0.408212	24	13.2698	10.0034	4.17697	0.417556	8.24411	7.26672	6.88055	11.6548	14.1198	14.813	9.0951	7.95297
Tle1	0.147471	0.707515	24	8.60125	11.616	0.0440476	0.413932	24	9	9.10446	0.287515	1	24	8.6332	72.4755	0.0504664	0.409276	24	8.74477	55.5674	13.3105	0.239539	44.6931	56.2336	62.0593	81.4968	56.3303	46.9356	44.3973	52.3929
Gramd4	0.034686	0.507044	24	23.0086	2.3098	0.249206	0.801565	24	22.5	2.23654	0.216074	1	24	1.90598	7.59119	0.0504686	0.409276	24	23.7784	6.32379	2.43383	0.384869	7.11231	7.90866	7.12244	2.97877	3.96189	5.1263	8.26576	8.11418
Nup210l	0.0892053	0.63432	24	21.3649	0.0435911	0.113095	0.577886	24	21	0.046294	0.185452	1	24	20.9999	0.165538	0.0505324	0.409548	24	21.1216	0.109269	0.0473409	0.0473409	0.141475	0.0770324	0.0806314	0.0289201	0.119154	0.0998629	0.165868	0.161209
Mettl7a3	0.142467	0.704883	24	11.1061	0.039345	0.0440476	0.413932	24	13.5	0.0364324	0.298607	1	24	9.97293	0.163652	0.0505895	0.409766	24	11.5108	0.11211	0.0409458	0.0409458	0.0900293	0.0256775	0.107509	0.173521	0.148943	0.133151	0.110579	0.107473
Fmnl3	0.0678674	0.586056	24	0.308482	0.843459	0.113095	0.577886	24	3	0.835406	0.244632	1	24	2.80444	4.21933	0.0506645	0.409943	24	2.0528	3.71703	1.30068	0.349923	3.8584	4.6733	3.7628	3.21013	3.03844	2.79616	3.37265	5.02435
Sephs2	0.0325624	0.504601	24	11.2955	104.732	0.249206	0.801565	24	12	96.8065	0.231436	1	24	13.8154	1042.73	0.0506719	0.409943	24	12.3635	941.11	117.447	0.124796	861.593	932.092	989.267	963.994	1032.12	1068.53	894.747	786.538
Cox20	0.0588067	0.56281	24	22.3641	1.09301	0.113095	0.577886	24	1.5	1.416	0.283649	1	24	7.73643e-05	11.8353	0.050838	0.411041	24	23.9561	9.82858	1.09831	0.111747	11.8839	10.9386	10.8315	8.30007	8.45997	8.98766	10.1456	9.08144
Exoc7	0.0998325	0.648839	24	8.70384	2.49255	0.113095	0.577886	24	7.5	3.33789	0.167306	1	24	8.47754	26.9525	0.0508871	0.411193	24	8.22812	23.7442	3.10778	0.130886	21.7614	24.7531	26.9847	25.7678	26.78	21.0378	20.5953	22.2737
Gtf2b	0.133268	0.69923	24	9.9214	2.77005	0.0440476	0.413932	24	9	1.44367	0.322138	1	24	8.57816	19.857	0.0509266	0.411263	24	9.16567	16.5961	2.93999	0.177149	15.2921	14.8929	19.2172	21.8347	15.4305	18.4413	13.85	13.8102
Trim28	0.042125	0.524288	24	11.0578	5.39587	0.249206	0.801565	24	15	7.06745	0.180276	1	24	11.9739	62.1348	0.0509564	0.411263	24	12.6446	54.6121	6.05274	0.110831	48.7316	48.6588	50.6365	61.6577	60.6496	59.8512	52.3037	54.408
BC030336	0.0882623	0.633632	24	12.4349	2.99154	0.113095	0.577886	24	15	3.1861	0.189814	1	24	12.938	21.366	0.0510003	0.411372	24	13.448	17.6145	4.22254	0.23972	17.157	12.9158	16.5026	19.2029	21.001	21.6702	17.5544	14.9118
Erf	0.0960597	0.640264	24	8.27518	3.24835	0.113095	0.577886	24	7.5	3.64487	0.174638	1	24	7.06322	18.8493	0.0510497	0.411526	24	7.61233	14.1004	4.61065	0.326987	10.7907	14.4821	19.1097	18.827	14.09	11.8171	11.0855	12.6012
Kank3	0.103122	0.65637	24	12.5097	0.61529	0.113095	0.577886	24	15	0.723276	0.162858	1	24	13.0925	5.39273	0.0510911	0.411614	24	13.5263	4.51127	0.885533	0.196294	4.2571	3.59484	4.16596	4.62722	5.39174	5.49246	4.42315	4.1377
Nsmce2	0.285401	0.788912	24	7.33623	0.566441	0.0440476	0.413932	24	6	0.910743	0.151904	1	24	5.96121	7.27898	0.0512925	0.412788	24	6.43036	6.11067	1.09657	0.179452	5.68471	7.00994	7.41809	6.6227	6.13646	5.02643	5.66716	5.3199
Kif1c	0.103315	0.656976	24	23.7915	6.82311	0.113095	0.577886	24	3	7.44441	0.163513	1	24	7.73643e-05	199.246	0.0513106	0.412788	24	0.904012	188.644	8.43684	0.0447236	199.711	195.508	193.22	188.935	178.702	174.594	190.029	188.453
Tax1bp3	0.187013	0.741572	24	12.5195	1.00333	0.0440476	0.413932	24	15	0.876176	0.232043	1	24	13.4889	7.0618	0.0513281	0.412788	24	13.6662	5.49368	1.48236	0.269831	4.90017	4.13407	4.97227	5.37914	6.88117	7.65616	4.9484	5.07808
Eif2a	0.0603827	0.566318	24	10.6018	2.81557	0.113095	0.577886	24	7.5	2.38575	0.280224	1	24	8.98504	32.4298	0.0513713	0.41289	24	9.0277	29.034	2.84101	0.0978513	30.9829	27.6289	32.4676	32.4484	30.5333	29.9256	24.0232	24.2619
Gnl3	0.034961	0.507372	24	11.084	8.5461	0.249206	0.801565	24	10.5	8.94976	0.219977	1	24	11.581	34.2192	0.0514281	0.413101	24	11.0551	23.3577	8.66402	0.370927	20.771	17.4607	20.6685	35.109	31.9036	28.8604	15.5916	16.497
Zfp771	0.0847239	0.625808	24	11.4175	1.11633	0.113095	0.577886	24	15	1.11995	0.200264	1	24	12.4852	8.76805	0.0514742	0.413227	24	12.9491	7.23173	1.33942	0.185214	5.77474	6.34233	6.66553	7.89519	8.25145	9.38711	6.55179	6.98572
Lpin3	0.279866	0.78853	24	6.92418	1.06076	0.0440476	0.413932	24	6	1.415	0.156265	1	24	6.06138	6.66036	0.0516197	0.41415	24	6.32792	4.61911	2.14912	0.465267	3.72978	6.08556	6.9343	5.55266	4.76618	2.52986	3.56616	3.78841
Ppwd1	0.12205	0.683811	24	0.117185	0.391413	0.113095	0.577886	24	3	0.695876	0.140048	1	24	1.7481	8.30785	0.0517521	0.414772	24	1.62486	7.59843	0.552816	0.072754	8.30842	8.11408	8.33192	7.25895	7.0599	6.89054	7.38113	7.44248
Arhgap24	0.0247314	0.482512	24	23.4409	4.9821	0.488095	1	24	3	5.10429	0.16021	1	24	1.6462	15.7539	0.0517681	0.414772	24	1.37316	12.1684	6.25792	0.514276	14.5462	17.4863	13.1698	6.96974	7.68546	6.82396	14.6793	15.9866
Fech	0.0338797	0.504682	24	11.1546	14.3323	0.249206	0.801565	24	12	15.8776	0.229186	1	24	11.0572	145.585	0.0517891	0.414772	24	11.4033	132.222	14.8314	0.112171	128.369	117.397	143.954	139.713	145.16	144.934	122.659	115.587
Mocos	0.0414393	0.524288	24	23.4518	6.90203	0.249206	0.801565	24	1.5	7.03878	0.188206	1	24	2.04233	53.7258	0.0519562	0.415865	24	1.00759	48.3407	8.36342	0.17301	51.6768	55.5917	51.7385	38.2902	42.0615	44.8717	47.5765	54.9185
Clec2h	0.435752	0.788912	24	6.91658	7.472	0.0138889	0.278415	24	6	6.94996	0.321679	1	24	6.05206	27.3807	0.0520196	0.416126	24	6.32229	10.6095	15.164	1.42929	5.80046	11.6319	37.3324	14.8939	5.03428	1.69767	3.6491	4.83627
Aldob	0.202697	0.7566	24	13.2037	1132.21	0.0440476	0.413932	24	15	981.274	0.218606	1	24	14.5768	5806.64	0.0521159	0.416332	24	14.263	3836.69	1985.85	0.517595	3290.67	2567.15	3047.57	3323.87	5348.67	6348.42	3894.11	2873.04
Cryz	0.0737577	0.602466	24	11.5752	9.21309	0.113095	0.577886	24	12	9.09931	0.23407	1	24	14.0228	69.7946	0.0521303	0.416332	24	12.5237	58.7247	10.7092	0.182363	50.4164	53.2037	62.0056	55.6712	73.7864	68.3395	57.5286	48.8463
Sftpd	0.140453	0.704883	24	11.2125	0.165226	0.0440476	0.413932	24	13.5	0.0989067	0.315664	1	24	11.9977	0.536996	0.0521375	0.416332	24	12.2331	0.285252	0.182118	0.182118	0.141475	0.154065	0.215017	0.318121	0.685138	0.332876	0.193513	0.241813
Fam135a	0.0129461	0.436442	24	21.4698	4.14642	0.488095	1	24	0	3.50842	0.309996	1	24	20.0562	43.0173	0.0522532	0.41698	24	21.8244	43.1786	4.21339	0.0975805	51.2395	46.091	40.1545	39.5627	40.87	40.5776	44.5356	42.398
Wdr13	0.10664	0.660459	24	20.7807	1.56471	0.113095	0.577886	24	21	2.34183	0.162534	1	24	21	28.648	0.0522803	0.41698	24	20.9269	26.8172	1.74545	0.0650869	28.565	24.9842	25.2645	24.4664	27.0779	27.0628	28.5293	28.5877
Pithd1	0.135333	0.699783	24	21.7554	1.61211	0.0440476	0.413932	24	22.5	0.868666	0.330431	1	24	19.9144	17.944	0.0524647	0.417792	24	21.397	16.6416	1.69437	0.101816	17.8901	16.562	16.852	12.8116	16.5327	16.6771	17.8861	17.9211
Klra2	0.0261021	0.482512	24	21.7749	0.538213	0.488095	1	24	21	0.834871	0.154731	1	24	20.9999	3.96732	0.0524955	0.417792	24	21.2579	2.81883	0.571208	0.20264	2.77805	2.10555	2.31143	2.28469	2.20436	3.29548	3.62145	3.94962
Dmd	0.0402289	0.519678	24	11.4752	5.31117	0.249206	0.801565	24	12	3.88779	0.196782	1	24	11.8333	41.7717	0.052524	0.417792	24	11.7695	35.2834	5.68929	0.161245	32.3591	31.8914	31.8763	41.269	42.8956	36.3501	35.8828	29.743
Supt6	0.0932584	0.635814	24	0.194337	4.68831	0.113095	0.577886	24	3	4.72908	0.187102	1	24	0.172608	54.9035	0.0525354	0.417792	24	1.10252	50.8209	6.14053	0.120827	54.1462	56.5931	50.3678	50.6102	46.7086	42.2087	50.3962	55.5365
Ilvbl	0.143785	0.706222	24	11.3471	2.1618	0.0440476	0.413932	24	13.5	1.39568	0.31159	1	24	13.2525	19.6798	0.0525362	0.417792	24	12.7069	17.0602	2.51391	0.147355	14.9191	14.9443	18.1958	15.8771	21.5372	18.8408	16.4762	15.691
Hnrnpa3	0.0824591	0.623898	24	23.0633	4.5757	0.113095	0.577886	24	3	5.89373	0.212314	1	24	7.73643e-05	56.336	0.0526633	0.418487	24	0.655983	45.1044	5.14024	0.113963	55.278	55.8741	44.0248	46.2432	37.4145	38.2142	42.4899	41.2964
Fbxo6	0.112742	0.667231	24	0.188064	2.81268	0.113095	0.577886	24	3	4.00723	0.155375	1	24	2.27487	21.9871	0.0526853	0.418487	24	1.83134	18.4856	4.13182	0.223515	21.3498	21.8002	22.1468	15.1252	16.4135	13.7478	17.5267	19.775
BC055324	0.0412921	0.52369	24	22.1033	0.139923	0.249206	0.801565	24	21	0.169331	0.192684	1	24	20.9999	0.702642	0.0527174	0.418497	24	21.3666	0.472479	0.145413	0.145413	0.540176	0.333807	0.403157	0.375961	0.297886	0.466027	0.691117	0.671704
Smyd5	0.248522	0.777332	24	8.27451	0.708246	0.0440476	0.413932	24	7.5	1.2424	0.181282	1	24	6.14628	9.88545	0.05275	0.41851	24	7.30945	8.76888	1.06742	0.121728	8.21839	10.3223	9.19198	10.0064	8.99616	7.85588	7.76815	7.79177
Mgrn1	0.0732529	0.600514	24	9.04821	8.24673	0.113095	0.577886	24	10.5	5.95167	0.24015	1	24	8.87742	55.981	0.0528483	0.419045	24	9.47218	44.4284	8.59083	0.193364	35.7288	43.703	49.1045	58.5632	50.4023	36.5498	40.8312	40.544
Pitpnc1	0.0828498	0.624058	24	9.22547	4.84766	0.113095	0.577886	24	9	5.22462	0.212848	1	24	8.80018	33.1376	0.0529418	0.419429	24	9.00854	25.8512	5.34324	0.206692	22.4302	24.4193	30.5593	33.8365	29.0737	20.5052	24.4102	21.5751
Ubqln4	0.323428	0.788912	24	17.7342	2.55458	0.0440476	0.413932	24	18	3.59974	0.140338	1	24	16.3869	30.7413	0.0530366	0.419429	24	17.3763	25.8997	6.63537	0.256195	27.1631	21.7231	20.9373	23.2228	26.9289	30.1586	31.4043	25.6591
Atad3a	0.0363867	0.508851	24	9.76924	7.40223	0.249206	0.801565	24	12	5.53148	0.220565	1	24	9.87974	59.1572	0.0530513	0.419429	24	10.5408	50.7175	7.25228	0.142994	41.9022	50.4562	51.7923	58.5921	61.6327	47.0021	46.913	47.4492
Tmem50a	0.168827	0.725101	24	12.761	11.2938	0.0440476	0.413932	24	15	9.08508	0.269052	1	24	14.3592	69.0434	0.0530658	0.419429	24	14.0446	51.7369	18.2769	0.353266	47.3425	39.6973	47.7069	49.7715	64.1647	75.9624	48.5717	40.6784
Itsn1	0.0426795	0.525501	24	23.7824	7.18275	0.249206	0.801565	24	3	6.58577	0.188172	1	24	2.08595	35.3454	0.0530776	0.419429	24	1.63684	30.6161	9.75004	0.318461	33.6967	37.6175	31.3656	27.2717	22.401	20.7715	34.9152	36.89
Lrrc29	0.106562	0.660459	24	8.66607	0.798274	0.113095	0.577886	24	9	1.05552	0.166089	1	24	8.20212	3.80436	0.0530824	0.419429	24	8.62281	2.7074	0.9334	0.344759	1.98064	3.23536	3.60154	3.67285	3.42569	1.59781	2.18393	1.96138
Eif2d	0.0352678	0.507372	24	11.1749	4.21733	0.249206	0.801565	24	10.5	4.80088	0.228218	1	24	11.9207	27.9748	0.0531626	0.419789	24	11.1984	22.837	4.3099	0.188725	20.3209	22.4164	21.448	27.2138	26.3629	27.5954	18.826	18.5122
Rbm26	0.0720433	0.598465	24	22.7603	2.72469	0.113095	0.577886	24	1.5	2.28106	0.246353	1	24	7.73643e-05	36.8893	0.05319	0.419789	24	0.084887	31.6974	2.86532	0.090396	36.6934	33.8429	30.5324	30.1926	31.0397	26.7965	31.4873	32.9941
Zfp36l1	0.0413051	0.52369	24	22.934	11.247	0.249206	0.801565	24	1.5	11.928	0.195483	1	24	7.73643e-05	55.9668	0.053286	0.420252	24	0.141888	44.1163	12.0503	0.273147	56.6027	50.3278	50.6634	33.4027	29.6695	32.6219	53.1607	46.4819
Atad5	0.0341428	0.504733	24	23.4912	0.984138	0.249206	0.801565	24	0	1.07549	0.236641	1	24	2.2309	3.61072	0.0533107	0.420252	24	0.561837	3.16713	1.14189	0.360545	3.27964	4.05704	3.19838	2.05333	2.44267	2.1637	3.87025	4.27204
Hmgn2	0.0703022	0.591352	24	10.1304	1.78117	0.113095	0.577886	24	9	1.44735	0.253553	1	24	6.66241	11.4436	0.0533585	0.420384	24	8.61202	10.021	1.92385	0.191982	8.33414	9.86014	12.5248	10.2088	11.4984	11.4177	8.18282	8.14105
Wnt5b	0.12147	0.682438	24	12.7035	1.23857	0.113095	0.577886	24	15	1.74985	0.146886	1	24	13.1921	6.43098	0.0533951	0.420428	24	13.6253	4.73848	1.84032	0.388377	3.98701	3.10697	3.14463	5.92862	5.89815	6.52438	5.55658	3.76154
AA986860	0.0797276	0.618928	24	12.1348	0.550918	0.113095	0.577886	24	13.5	0.518823	0.224024	1	24	12.2141	2.06723	0.0534358	0.420504	24	12.6143	1.25899	0.666337	0.529263	1.08035	0.796001	0.860069	1.47493	2.23415	1.79753	1.02285	0.806045
Slc27a5	0.072696	0.599548	24	11.2036	67.8805	0.113095	0.577886	24	13.5	62.0077	0.246141	1	24	12.0273	812.744	0.0535067	0.420818	24	12.2403	714.555	74.8159	0.104703	646.809	708.903	665.183	753.079	840.248	753.898	676.963	671.355
Pmepa1	0.0355814	0.507372	24	22.794	0.572667	0.249206	0.801565	24	22.5	0.556063	0.229308	1	24	4.09157e-05	2.43308	0.0536919	0.421697	24	23.0961	2.21097	0.579989	0.262323	2.35362	2.59342	1.8814	1.90873	1.37028	1.96397	2.90269	2.71368
Pdhb	0.0403658	0.520454	24	11.8733	31.7665	0.249206	0.801565	24	12	31.9387	0.202185	1	24	12.2371	135.085	0.0537028	0.421697	24	12.0368	94.3142	35.2523	0.373775	81.6051	73.4632	81.7872	113.454	130.027	136.779	75.387	62.0117
Arl6ip1	0.0956445	0.639092	24	12.202	15.8702	0.113095	0.577886	24	15	18.6042	0.18807	1	24	12.3684	153.03	0.0537118	0.421697	24	13.1726	129.732	21.0332	0.162128	122.388	110.696	117.614	139.077	149.986	154.921	121.996	121.175
Rab3gap1	0.0781302	0.61521	24	9.91135	6.21023	0.113095	0.577886	24	9	5.71986	0.231022	1	24	9.03824	52.0155	0.0538463	0.422502	24	9.31593	42.7435	6.53011	0.152774	41.4521	41.1866	44.2935	54.9482	48.2873	37.382	38.2602	36.1377
Hfe2	0.0398644	0.516446	24	23.0758	14.3197	0.249206	0.801565	24	0	13.33	0.20564	1	24	1.99396	61.064	0.0538767	0.422502	24	0.347713	50.6399	15.7485	0.310989	57.0786	64.5531	56.7108	29.2671	35.3591	44.206	58.1091	59.8354
Prkacb	0.0850089	0.625852	24	12.3246	2.60729	0.113095	0.577886	24	13.5	3.01785	0.212742	1	24	13.0636	55.0335	0.0539227	0.422618	24	12.9631	52.2301	3.36052	0.0643407	51.8054	48.4534	51.2278	54.4855	54.8706	54.3587	53.6859	48.9538
Supt7l	0.0820438	0.623543	24	23.1298	1.18283	0.113095	0.577886	24	3	1.06271	0.220708	1	24	7.73643e-05	10.6635	0.053972	0.422759	24	0.678405	8.48892	1.34118	0.157992	10.6492	9.24388	8.03627	8.27115	7.89398	6.42451	7.96166	9.43072
Kcnj16	0.26259	0.781845	24	12.8771	0.232329	0.0440476	0.413932	24	16.5	0.273385	0.177435	1	24	13.7234	1.9174	0.0540561	0.423174	24	14.3419	1.59703	0.401896	0.251651	1.44047	1.00142	1.2901	1.90873	1.72774	1.99726	1.85219	1.55835
Cnpy2	0.0530968	0.546568	24	11.2899	4.3461	0.113095	0.577886	24	10.5	4.69234	0.342207	1	24	11.8867	46.7303	0.0541071	0.423219	24	11.2259	42.5096	4.44873	0.104652	41.5164	43.1124	44.186	45.3178	44.8617	48.4002	37.4585	35.2242
Gtf3c1	0.0234074	0.478397	24	22.2902	6.58052	0.488095	1	24	21	6.48018	0.179943	1	24	20.9999	76.7746	0.0541243	0.423219	24	21.4282	69.6152	6.75035	0.0969666	74.6214	72.8213	62.8388	65.5908	65.0583	64.2118	76.5481	75.2308
Cox8a	0.247291	0.777332	24	13.1948	16.0588	0.0440476	0.413932	24	15	18.1334	0.18925	1	24	14.6186	172.565	0.0542308	0.423807	24	14.2743	142.148	28.2144	0.198486	129.848	119.066	130.596	128.058	172.893	175.759	145.466	135.496
Tchp	0.0630933	0.573384	24	23.8408	0.364862	0.113095	0.577886	24	0	0.288183	0.289251	1	24	7.73643e-05	1.93462	0.0542796	0.423872	24	23.947	1.72613	0.400328	0.231922	1.91634	1.90013	1.55887	1.76413	1.28091	1.36479	1.68632	2.33753
Usp42	0.157986	0.716166	24	0.793599	0.72555	0.113095	0.577886	24	3	1.40077	0.11558	1	24	1.02739	8.36068	0.0543017	0.423872	24	1.5993	7.05484	1.07832	0.152849	8.37272	8.24246	7.79437	7.43247	5.65984	5.95849	5.77774	7.20067
Lef1	0.0560415	0.557151	24	0.0495796	0.0740829	0.249206	0.801565	24	3	0.0832953	0.148153	1	24	3.07147	0.235376	0.0543773	0.424218	24	2.06405	0.15801	0.110337	0.110337	0.19292	0.256775	0.215017	0.0867603	0.0595772	0.0998629	0.138223	0.214945
Gphn	0.36335	0.788912	24	7.00262	3.85439	0.0440476	0.413932	24	6	9.54382	0.12956	1	24	5.40587	67.5029	0.054463	0.424642	24	6.13517	59.5982	8.13309	0.136465	62.3646	68.7129	65.3921	67.0368	61.5731	47.5347	50.8385	53.3333
Tmem167b	0.0494539	0.537841	24	21.7304	1.66247	0.113095	0.577886	24	1.5	1.09456	0.371861	1	24	7.73643e-05	36.266	0.0545822	0.425327	24	23.7545	32.4258	1.53857	0.0474491	36.6419	32.4306	32.8708	30.8288	30.8014	31.8563	31.6808	32.2955
Zfp428	0.242273	0.777332	24	19.4821	0.283856	0.0440476	0.413932	24	18	0.301591	0.195202	1	24	17.2631	1.18814	0.0546448	0.42557	24	18.2449	0.772155	0.565093	0.565093	1.02891	0.436517	0.37628	0.520562	0.506407	1.23164	1.24401	0.832913
[truncated: 11,811 more rows]

## Sheet: RNAseq_hepKO
Figure 2 ̶ source data 1. Hepatic circadian transcriptome of WT and hepKO mice.
[truncated: 13,552 more rows]
