# Supplementary material for: KLF10 integrates circadian timing and sugar signaling to coordinate hepatic metabolism
Source: eLife. 2021 Aug 17;10:e65574. doi: 10.7554/eLife.65574 (PMC8410083; doi:10.7554/eLife.65574)
Supplement: Figure 2—source data 2. [file elife-65574-fig2-data2.xlsx]

## Sheet: PSEA_WT
PSEA analysis of the hepatic transcriptome of WT and HepKO mice fed ad libitum and entrained in a 12:12 LD cycle.
Gene Set	N° Genes	Pval_uni	Qval_uni	VecAvgMag	VecAvgVal	Genes
Adipogenesis	40	0	0	0.428808	13.3958	COL15A1	ACAA2	GBE1	AK2	ABCB8	ADCY6	PRDX3	SULT1A1	SAMM50	DHRS7B	ENPP2	G3BP2	UBQLN1	PIM3	CYC1	ACADS	RREB1	SLC19A1	BCKDHA	STAT5A	CHUK	DGAT1	ELMOD3	ELOVL6	COQ9	MRAP	SLC5A6	ARL4A	POR	CCNG2	GPD2	RAB34	NDUFS3	UQCRC1	PEMT	PLIN2	SLC25A10	ACO2	TKT	CRAT
Oxidative phosphorylation	29	0	0	0.89551	12.8812	SLC25A3	ACAA2	ATP5A1	TIMM13	COX7A2	ATP5G2	ATP5G1	TIMM50	PRDX3	ATP5B	PDK4	UQCRFS1	CYC1	NDUFV1	ATP6V1C1	BCKDHA	ATP6V0B	CPT1A	NDUFA7	AFG3L2	POR	FDX1	NDUFS3	UQCRC1	VDAC2	VDAC1	ACO2	SLC25A12	SLC25A11
MYC targets V2	11	0.0001	0.0013	0.84645	12.4246	RCL1	EXOSC5	NOP16	PUS1	SORD	PHB	TMEM97	MAP3K6	SLC19A1	RRP9	TBRG4
Xenobiotic metabolism	35	0.0002	0.00195	0.337833	12.1544	CDA	DDC	AHCY	ACSM1	AQP9	GSTT2	CROT	TMEM97	SERPINA6	ADH5	PSMB10	RAP1GAP	NFS1	CASP6	KYNU	GCNT2	PDK4	ACP2	ASL	HACL1	PTGDS	HGFAC	GABARAPL1	SLC12A4	GCH1	IGFBP4	DHPS	GCLC	POR	PEMT	ACO2	ACOX3	FBP1	LPIN2	PPARD
Heme metabolism	29	0.0003	0.00234	0.448299	12.668	SLC22A4	GYPA	NARF	ENDOD1	GDE1	SLC4A1	ADIPOR1	SLC30A10	RAP1GAP	TRAK2	SELENBP1	PSMD9	SEC14L1	PGLS	FN3K	MAP2K3	NCOA4	SLC11A2	FBXO34	MARCH8	RAD23A	KLF1	RCL1	KAT2B	MINPP1	GCLC	XK	SLC6A9	LPIN2
G2M checkpoint	19	0.0004	0.0026	0.551254	22.2065	SLC12A2	CASP8AP2	POLQ	TLE3	CCNF	SRSF1	ARID4A	H2AFV	SMC2	CUL4A	MEIS1	UCK2	RBL1	TRA2B	CHMP1A	ATF5	KPNB1	PAFAH1B1	TMPO
MTORC1 signaling	31	0.0006	0.00334286	0.388789	14.1264	PPP1R15A	IDI1	CDKN1A	TOMM40	GBE1	CCNF	AK4	TMEM97	ATP5G1	ACACA	RRP9	GGA2	FADS2	SLC9A3R1	PNP	NFIL3	NAMPT	SLC37A4	MAP2K3	RRM2	HMGCS1	IFRD1	SORD	ELOVL6	TUBA4A	GCLC	BHLHE40	DDIT4	POLR3G	TRIB3	GAPDH
Cholesterol homeostasis	16	0.0007	0.0034125	0.569711	0.200342	IDI1	MVK	CHKA	HMGCS1	CDKN1A	GCH1	GADD45A	BGN	PSEN2	HSPB1	NEDD9	AVPR1A	PSEN1	RHOB	TGFBR3	AIFM3
IL2 STAT5 signaling	27	0.0029	0.0125667	0.294669	1.39468	AHCY	RNH1	ITGAE	LCLAT1	NDRG1	CCND2	PNP	SYNGR2	NFIL3	GLIPR2	SLC39A8	TGM2	GABARAPL1	CISH	PUS1	DHRS3	MYO1E	ARL4A	UCK2	AMACR	P2RX4	SYT11	BHLHE40	MAFF	PLIN2	IRF6	IL18R1
Interferon Alpha response	7	0.0047	0.01833	0.671847	23.6348	ISG20	CXCL11	SLC25A28	STAT2	CMPK2	TRIM14	PARP9
Apical junction	21	0.0124	0.0353786	0.32918	23.4234	GAMT	IRS1	ACTN1	LAYN	MSN	PIK3CB	BAIAP2	ACTB	ACTG1	DLG1	BMP1	CDH3	CDH1	AKT2	AKT3	TSPAN4	MVD	CRAT	MPZL1	VCL	CRB3
Epithelial Mesenchymal Transition	16	0.0123	0.0353786	0.45753	23.2108	SDC4	IGFBP4	TFPI2	TNFAIP3	NID2	PVR	GEM	DAB2	MMP14	BMP1	CXCL12	TIMP3	ITGA5	MEST	FERMT2	TGM2
Fatty acid metabolism	15	0.0127	0.0353786	0.325841	11.7224	IDI1	CPT1A	GABARAPL1	ACAA2	HMGCS1	ACSL4	GRHPR	AUH	GPD2	ACO2	MLYCD	PPARA	ACADS	CRAT	S100A10
KRAS signaling up	16	0.0117	0.0353786	0.419267	1.14119	GUCY1A3	PPP1R15A	ATG10	TNFAIP3	TOR1AIP2	CROT	AKAP12	LAT2	ADAM17	CCND2	KIF5C	AKT2	MAP7	PRKG2	SOX9	EVI5
Mitotic spindle	17	0.0155	0.0377813	0.552086	1.78066	PCGF5	TBCD	SORBS2	SHROOM1	PKD2	CKAP5	MID1	TUBA4A	ARHGAP4	LATS1	NET1	MYO1E	DLG1	CDC42EP4	KIF3C	VCL	PAFAH1B1
TNFA signaling via NFKB	30	0.0147	0.0377813	0.15402	7.58207	PPP1R15A	CDKN1A	BTG1	SDC4	PLEK	TNFAIP2	RNF19B	TNFAIP3	NFIL3	KYNU	NAMPT	ZC3H12A	DUSP4	KLF10	MAP2K3	STAT5A	IL15RA	GCH1	DDX58	IFNGR2	ZBTB10	GEM	PNRC1	EIF1	NFKBIA	PER1	CXCL11	TUBB2A	BHLHE40	MAFF
Bile acid metabolism	19	0.0168	0.0385412	0.155037	11.4113	HSD3B7	IDI1	SLC35B2	ABCA6	AQP9	BBOX1	CROT	SERPINA6	CYP8B1	KLF1	FADS2	SULT1B1	AMACR	LCK	SOAT2	PEX6	HACL1	MLYCD	SLC29A1
Interferon Gamma response	22	0.0195	0.04225	0.162476	22.2286	IL15RA	CDKN1A	BTG1	GCH1	DDX58	STAT2	TNFAIP2	TNFAIP3	TOR1B	PSMB10	ISG20	NFKBIA	ARL4A	CXCL11	PNP	SLC25A28	BANK1	NAMPT	CMPK2	ST3GAL5	TRIM14	RBCK1

## Sheet: PSEA_hepKO
PSEA analysis of the hepatic transcriptome of WT and HepKO mice fed ad libitum and entrained in a 12:12 LD cycle.
Gene Set	N° Genes	Pval_uni	Qval_uni	VecAvgMag	VecAvgVal	Genes
Cholesterol homeostasis	20	0.0001	0.0011	0.512345	1.24301	ERRFI1	ACSS2	MVK	CHKA	HMGCS1	GLDC	ANXA5	LPL	AVPR1A	TMEM97	PNRC1	ADH4	FADS2	NSDHL	NFIL3	ETHE1	FBXO6	MVD	ATF5	GUSB
UV response down	16	0.0008	0.00586667	0.532433	10.5804	ATP5S	ANXA2	CITED2	SFMBT1	NR1D2	LAMC1	SYNJ2	MAPK14	RND3	TGFBR2	TGFBR3	DBP	GRK5	SCN8A	BHLHE40	MGLL
Heme metabolism	22	0.0029	0.01595	0.478784	9.77151	MAP2K3	NARF	FECH	GYPC	EPB41	EIF2AK1	MOCOS	SLC11A2	ACSL6	GDE1	FBXO34	RAD23A	FOXO3	SLC30A10	BACH1	RAP1GAP	RCL1	MINPP1	CCND3	GCLC	SLC6A9	BMP2K
Apoptosis	23	0.0099	0.0363	0.256067	9.78722	CDKN1A	GCH1	GADD45A	BGN	PSEN2	HSPB1	NEDD9	AVPR1A	PSEN1	RHOB	TGFBR3	AIFM3	WEE1	BCL2L11	CASP6	CASP4	CASP2	FAS	TIMP3	VDAC2	DNM1L	SQSTM1	BCL2L1
Complement	18	0.0099	0.0363	0.365884	9.57237	CEBPB	DOCK4	BRPF3	ANXA5	TFPI2	PSEN1	ADRA2B	LIPA	F5	PIK3R5	GNGT2	CCL5	GNB2	CASP4	FDX1	IRF2	MAFF	ANG
Glycolysis	27	0.0085	0.0363	0.2601	10.527	CITED2	AK4	NOL3	CLN6	GYS2	FUT8	NSDHL	CASP6	PGM2	SOX9	GUSB	LHPP	B3GAT3	AGL	SRD5A3	B3GALT6	ALG1	GALE	GCLC	DDIT4	TFF3	ANG	SLC25A10	KIF20A	RBCK1	POLR3K	GNE
IL2 STAT5 signaling	30	0.0137	0.037675	0.325468	10.7981	PHTF2	AHCY	ODC1	LCLAT1	NDRG1	CCND3	PNP	SYNGR2	NFIL3	GLIPR2	LRIG1	ENPP1	SH3BGRL2	PHLDA1	XBP1	CISH	PTCH1	DHRS3	RHOB	TTC39B	ARL4A	UCK2	AMACR	P2RX4	CCNE1	BHLHE40	MAFF	PLIN2	MXD1	BCL2L1
UV response up	25	0.013	0.037675	0.318444	10.2696	ALAS1	CNP	ONECUT1	TARS	CLCN2	CCND3	BCL2L11	PPAT	PRKACA	KLHDC3	RFC4	CHKA	DGAT1	GCH1	SIGMAR1	FMO1	HSPA2	TUBA4A	RHOB	NR4A1	CCNE1	PPIF	SLC25A4	SQSTM1	GRINA
Inflammatory response	22	0.0157	0.0383778	0.30789	11.4824	CDKN1A	GABBR1	GCH1	PCDH7	SLC11A2	SLC1A2	PSEN1	PVR	SLC7A2	PIK3R5	MARCO	RNF144B	CXCL11	P2RX4	IRAK2	CCL5	P2RY2	NAMPT	CCL2	ITGA5	MXD1	SCN1B
