# Supplementary material for: KLF10 integrates circadian timing and sugar signaling to coordinate hepatic metabolism
Source: eLife. 2021 Aug 17;10:e65574. doi: 10.7554/eLife.65574 (PMC8410083; doi:10.7554/eLife.65574)
Supplement: Figure 3—source data 1. [file elife-65574-fig3-data1.xlsx]

## Sheet: Fig3
Klf10 expression in challenged WT hepatocytes
	LG	HG	LGF	HGF
	1	19.9186	13.2899	19.7394
	0.554753	9.94322	5.14142	25.0087
	1.70456	8.43325	5.40708	9.7824
	0.969516	3.87717	2.39009	17.406
	0.682262	0.817636	5.49265	10.5091
	1.34364	8.10938	12.6442	26.0065
mean	1.04246	8.51655	7.39422	18.0753
sem	0.173571	2.66466	1.82576	2.82968
y	g
1	LG
0.554753	LG
1.70456	LG
0.969516	LG
0.682262	LG
1.34364	LG
19.9186	HG
9.94322	HG
8.43325	HG
3.87717	HG
0.817636	HG
8.10938	HG
13.2899	LGF
5.14142	LGF
5.40708	LGF
2.39009	LGF
5.49265	LGF
12.6442	LGF
19.7394	HGF
25.0087	HGF
9.7824	HGF
17.406	HGF
10.5091	HGF
26.0065	HGF
p-value: 0.001712
	HG	HGF	LG
HGF	0.015386
LG	0.005903	2.9e-05
LGF	0.948767	0.015386	0.005903
