# Supplementary material for: KLF10 integrates circadian timing and sugar signaling to coordinate hepatic metabolism
Source: eLife. 2021 Aug 17;10:e65574. doi: 10.7554/eLife.65574 (PMC8410083; doi:10.7554/eLife.65574)
Supplement: Figure 4—source data 1. [file elife-65574-fig4-data1.xlsx]

## Sheet: Fig4B
Klf10 expression in challenged mice
		ZT9					ZT15
		WT	WT_api	hepKO	hepKO_api		WT	WT_api	hepKO	hepKO_api
		5.78	5.02912	0.321955	0.604565		1	11.8427	0.250566	0.856068
		8.4368	8.76978	0.329888	0.86688		0.909536	3.98003	0.346856	0.582722
		5.556	14.9506	0.567222	0.822531		1.65859	2.71531	0.367987	0.642628
		17.2758	4.95816	0.457686			1.1	7.13883	0.230569	0.562181
		7.36056	8.33794	0.428423				5.25183	0.415593	0.660899
			5.70975					5.95798
								6.64717
								7.38318
mean		8.88183	7.95923	0.421035	0.764659		1.16703	6.36463	0.322314	0.660899
sem		1.9754	1.43758	0.0412782	0.0702037		0.150627	0.909681	0.0322453	0.0475577
		ZT9							ZT15
		y	g							y	g
		5.78	WT	p-value: 0.002582						1	WT	p-value: 0.000225
		8.4368	WT		WT_api	WT	hepKO_api			0.909536	WT		WT_api	WT	hepKO_api
		5.556	WT	WT	0.528185					1.65859	WT	WT	0.000117542
		17.2758	WT	hepKO_api	0.007787	0.004283				1.1	WT	hepKO_api	5.44572e-08	0.002691
		7.36056	WT	hepKO	5.4e-05	5.4e-05	0.084599			11.8427	WT_api	hepKO	2.18704e-10	2e-06	0.000811
		5.02912	WT_api							3.98003	WT_api
		8.76978	WT_api							2.71531	WT_api
		14.9506	WT_api							7.13883	WT_api
		4.95816	WT_api							5.25183	WT_api
		8.33794	WT_api							5.95798	WT_api
		5.70975	WT_api							6.64717	WT_api
		0.321955	hepKO							7.38318	WT_api
		0.329888	hepKO							0.250566	hepKO
		0.567222	hepKO							0.346856	hepKO
		0.457686	hepKO							0.367987	hepKO
		0.428423	hepKO							0.230569	hepKO
		0.604565	hepKO_api							0.415593	hepKO
		0.86688	hepKO_api							0.856068	hepKO_api
		0.822531	hepKO_api							0.582722	hepKO_api
										0.642628	hepKO_api
										0.562181	hepKO_api
										0.660899	hepKO_api

## Sheet: Fig4C-E
	BW	g		WAT(g)			Liver (g)
WT	31.17			0.38			1.389
WT	32.27			0.74			1.29
WT	34.26			0.961			1.38
WT	32.72			0.484			1.49
WT	36.42			0.509			1.58
WT	34.02			0.659			1.36
WT	31.17			0.507			1.351
WT	28.05			0.369			1.303
WT	28.87			0.272
WT_api	32.16			0.52			1.396
WT_api	33.09			0.561			1.397
WT_api	40.08			1.385			1.633
WT_api	38.34			1.64			1.69
WT_api	29.4			0.705			1.152
WT_api	28.09			0.58			1.093
WT_api	34.43			0.792			1.383
WT_api	41.03			1.56			1.94
WT_api	37.69			1.064			1.57
WT_api	46.33			2.015			1.87
WT_api	37.3			0.881			1.773
WT_api	37.55						1.581
hepKO	29.89			0.326			1.45
hepKO	29.98			0.326			1.245
hepKO	34.32			0.455			1.53
hepKO	34.25			0.76			1.47
hepKO	28.36			0.593			1.342
hepKO	31.32			0.628			1.42
hepKO	34.61			1.216			1.391
hepKO	29.7			0.386			1.269
hepKO	29.5			0.336			1.377
hepKO	28.2			0.417			1.215
hepKO	39.52			1.45			1.639
hepKO_api	41.29			1.52			1.73
hepKO_api	35.51			1.166			1.627
hepKO_api	34.68			1.02			1.664
hepKO_api	35.72			1.195			1.617
hepKO_api	31.88			0.694			1.42
hepKO_api	33.27			0.801			1.437
hepKO_api	39.52			1.349			1.88
hepKO_api	32			0.538			1.41
hepKO_api	38.85			1.51			1.8
hepKO_api	44.77			1.72			1.85
hepKO_api	44.59			1.87			2.59
hepKO_api	43.46			2.096			1.42
	mean	sem		mean	sem		mean	sem
WT	32.1056	0.881859		0.542333	0.0710246		1.39288	0.0396736
WT_api	36.2908	1.48699		1.06391	0.153883		1.53983	0.0765301
hepKO	31.7864	1.0511		0.626636	0.114445		1.39527	0.0382528
hepKO_api	37.9617	1.37939		1.28992	0.138522		1.70375	0.094601
y	g			y	g		y	g
31.17	WT			0.38	WT		1.389	WT
32.27	WT			0.74	WT		1.29	WT
34.26	WT			0.961	WT		1.38	WT
32.72	WT			0.484	WT		1.49	WT
36.42	WT			0.509	WT		1.58	WT
34.02	WT			0.659	WT		1.36	WT
31.17	WT			0.507	WT		1.351	WT
28.05	WT			0.369	WT		1.303	WT
28.87	WT			0.272	WT		1.396	WT_api
32.16	WT_api			0.52	WT_api		1.397	WT_api
33.09	WT_api			0.561	WT_api		1.633	WT_api
40.08	WT_api			1.385	WT_api		1.69	WT_api
38.34	WT_api			1.64	WT_api		1.152	WT_api
29.4	WT_api			0.705	WT_api		1.093	WT_api
28.09	WT_api			0.58	WT_api		1.383	WT_api
34.43	WT_api			0.792	WT_api		1.94	WT_api
41.03	WT_api			1.56	WT_api		1.57	WT_api
37.69	WT_api			1.064	WT_api		1.87	WT_api
46.33	WT_api			2.015	WT_api		1.773	WT_api
37.3	WT_api			0.881	WT_api		1.581	WT_api
37.55	WT_api			0.326	hepKO		1.45	hepKO
29.89	hepKO			0.326	hepKO		1.245	hepKO
29.98	hepKO			0.455	hepKO		1.53	hepKO
34.32	hepKO			0.76	hepKO		1.47	hepKO
34.25	hepKO			0.593	hepKO		1.342	hepKO
28.36	hepKO			0.628	hepKO		1.42	hepKO
31.32	hepKO			1.216	hepKO		1.391	hepKO
34.61	hepKO			0.386	hepKO		1.269	hepKO
29.7	hepKO			0.336	hepKO		1.377	hepKO
29.5	hepKO			0.417	hepKO		1.215	hepKO
28.2	hepKO			1.45	hepKO_api		1.639	hepKO
39.52	hepKO			1.52	hepKO_api		1.73	hepKO_api
41.29	hepKO_api			1.166	hepKO_api		1.627	hepKO_api
35.51	hepKO_api			1.02	hepKO_api		1.664	hepKO_api
34.68	hepKO_api			1.195	hepKO_api		1.617	hepKO_api
35.72	hepKO_api			0.694	hepKO_api		1.42	hepKO_api
31.88	hepKO_api			0.801	hepKO_api		1.437	hepKO_api
33.27	hepKO_api			1.349	hepKO_api		1.88	hepKO_api
39.52	hepKO_api			0.538	hepKO_api		1.41	hepKO_api
32	hepKO_api			1.51	hepKO_api		1.8	hepKO_api
38.85	hepKO_api			1.72	hepKO_api		1.85	hepKO_api
44.77	hepKO_api			1.87	hepKO_api		2.59	hepKO_api
44.59	hepKO_api			2.096	hepKO_api		1.42	hepKO_api
43.46	hepKO_api
p-value: 0.004430				p-value: 0.000123			p-value: 0.005596
	WT_api	WT	hepKO_api		WT_api	WT		WT_api	WT	hepKO_api
WT	0.040368			WT	0.001977		WT	0.099045
hepKO_api	0.419428	0.008677		hepKO_api	0.260845	7.7e-05	hepKO_api	0.151074	0.005021
hepKO	0.029576	0.911137	0.007491	hepKO	0.001657	0.952538	hepKO	0.108543	0.741573	0.005021

## Sheet: Fig4F
Liver TG
	WT	WT_api	hepKO	hepKO_api
	6.08766	34.0669	8.09659	44.1964
	6.45292	24.3243	8.89423	29.7078
	7.22892	43.9583	13.5298	35.7955
	11.2689	44.2354	9.375	56.5257
	7.44485	45.2949	5.93112	43.0288
	4.125	29.4643	5.43981	129.643
		41.3462		48.8487
		27.8159		73.913
		56		82.4128
		38
mean	7.10138	38.4506	8.54443	60.4524
sem	0.962804	3.05474	1.18793	10.3561
	g	y
	6.08766	WT
	6.45292	WT
	7.22892	WT
	11.2689	WT
	7.44485	WT
	4.125	WT
	34.0669	WT_api
	24.3243	WT_api
	43.9583	WT_api
	44.2354	WT_api
	45.2949	WT_api
	29.4643	WT_api
	41.3462	WT_api
	27.8159	WT_api
	56	WT_api
	38	WT_api
	8.09659	hepKO
	8.89423	hepKO
	13.5298	hepKO
	9.375	hepKO
	5.93112	hepKO
	5.43981	hepKO
	44.1964	hepKO
	29.7078	hepKO_api
	35.7955	hepKO_api
	56.5257	hepKO_api
	43.0288	hepKO_api
	129.643	hepKO_api
	48.8487	hepKO_api
	73.913	hepKO_api
	82.4128	hepKO_api
p-value: 0.000041
	WT_api	WT	hepKO_api
WT	7e-06
hepKO_api	0.030031	1.45255e-07
hepKO	3.4e-05	0.539677	3.93111e-07

## Sheet: Fig4G
glycemia	mg/dl
WT	101
WT	94
WT	95
WT	113
WT	118
WT	117
WT	99
WT	89
WT	102
WT_api	116
WT_api	88
WT_api	108
WT_api	93
WT_api	93
WT_api	92
WT_api	101
WT_api	133
WT_api	118
WT_api	107
WT_api	148
WT_api	124
hepKO	104
hepKO	75
hepKO	95
hepKO	118
hepKO	83
hepKO	83
hepKO	87
hepKO	76
hepKO	81
hepKO	101
hepKO	101
hepKO_api	118
hepKO_api	91
hepKO_api	120
hepKO_api	80
hepKO_api	120
hepKO_api	134
hepKO_api	95
hepKO_api	119
hepKO_api	76
hepKO_api	212
hepKO_api	165
hepKO_api	113
	mean	sem
WT	103.111	3.50176
WT_api	110.083	5.32925
hepKO	91.2727	4.08788
hepKO_api	120.25	10.9199
y	g
101	WT
94	WT
95	WT
113	WT
118	WT
117	WT
99	WT
89	WT
102	WT
116	WT_api
88	WT_api
108	WT_api
93	WT_api
93	WT_api
92	WT_api
101	WT_api
133	WT_api
118	WT_api
107	WT_api
148	WT_api
124	WT_api
104	hepKO
75	hepKO
95	hepKO
118	hepKO
83	hepKO
83	hepKO
87	hepKO
76	hepKO
81	hepKO
101	hepKO
101	hepKO
118	hepKO_api
91	hepKO_api
120	hepKO_api
80	hepKO_api
120	hepKO_api
134	hepKO_api
95	hepKO_api
119	hepKO_api
76	hepKO_api
212	hepKO_api
165	hepKO_api
113	hepKO_api
p-value: 0.039555
	WT_api	WT	hepKO_api
WT	0.62434
hepKO_api	0.628914	0.41718
hepKO	0.058702	0.22505	0.035393

## Sheet: Fig4H
Serum insulin
	WT	WT_api	hepKO	hepKO_api
	9.20444	6.07156	10.4284	5.371
	1.09045	0.190871	1.00997	6.16949
	2.60264	0.305143	2.42385	1.863
	6.43691	1.30854	3.53296	2.86774
	6.42938	1.64423	7.56232	4.86822
	1.04997	2.86829	1.25047	7.28641
	2.30393	9.92934	0.630705	3.44927
	3.62186	4.929	1.60581	7.59336
	3.38174	0.236515	6.84856	24.0871
	1.11618	2.33132		14.3154
		1.33195
		0.170124
	WT	WT_api	hepKO	hepKO_api
mean	3.72375	2.60974	3.92145	7.7871
sem	0.875611	0.862028	1.16881	2.11787
y	g
9.20444	WT
1.09045	WT
2.60264	WT
6.43691	WT
6.42938	WT
1.04997	WT
2.30393	WT
3.62186	WT
3.38174	WT
1.11618	WT
6.07156	WT_api
0.190871	WT_api
0.305143	WT_api
1.30854	WT_api
1.64423	WT_api
2.86829	WT_api
9.92934	WT_api
4.929	WT_api
0.236515	WT_api
2.33132	WT_api
1.33195	WT_api
0.170124	WT_api
10.4284	hepKO
1.00997	hepKO
2.42385	hepKO
3.53296	hepKO
7.56232	hepKO
1.25047	hepKO
0.630705	hepKO
1.60581	hepKO
6.84856	hepKO
5.371	hepKO_api
6.16949	hepKO_api
1.863	hepKO_api
2.86774	hepKO_api
4.86822	hepKO_api
7.28641	hepKO_api
3.44927	hepKO_api
7.59336	hepKO_api
24.0871	hepKO_api
14.3154	hepKO_api
p-value: 0.045281
	WT_api	WT	hepKO_api
WT	0.32808
hepKO_api	0.026215	0.174267
hepKO	0.32808	0.958707	0.174267

## Sheet: Fig4I
time		0	15	30	45	60	120	mean
WT		100.778	197.889	161.875	159.667	140.444	95.7778
WT_api		111.333	242.75	206	164.917	158	106.417
hepKO		94.3	180.7	177.3	150	138.9	93.8
hepKO_api		132.5	265.083	248.75	227.833	209.417	134.333
								sem
WT		3.62774	13.3681	6.92691	7.77817	6.81524	5.02432
WT_api		5.43464	20.4906	13.8016	9.73393	9.72267	7.27955
hepKO		6.28057	14.9154	15.1577	15.064	16.6896	6.82935
hepKO_api		9.32941	16.8431	11.7087	12.1909	13.6579	10.2782
					> DataRGTT <- read.table("RGTT.txt", header=TRUE)
					> anova3GTT <- (aov(gly~geno*diet*time,DataRGTT))
					> summary(anova3GTT)
					Df Sum Sq Mean Sq F value Pr(>F)
					geno 1 20811 20811 6.583 0.01088 *
					diet 1 125810 125810 39.796 0.00000000128 ***
					time 1 81547 81547 25.795 0.00000074487 ***
					geno:diet 1 28921 28921 9.148 0.00275 **
					geno:time 1 348 348 0.110 0.74034
					diet:time 1 2084 2084 0.659 0.41763
					geno:diet:time 1 14 14 0.004 0.94674
					Residuals 249 787183 3161
					---
					Signif. codes: 0 '***' 0.001 '**' 0.01 '*' 0.05 '.' 0.1 ' ' 1
					1 observation deleted due to missingness
					>
AUC (gxmin/dl)
	WT	16.4175	0.561389		16417.5	561.389	16.4175	0.561389
	WT_api	19.1575	0.997131		19157.5	997.131	19.1575	0.997131
	hepKO	16.227	1.39641		16227	1396.41	16.227	1.39641
	hepKO_api	24.0019	1.35669		24001.9	1356.69	24.0019	1.35669
AUC GTT
y	g
18877.5	WT
17655	WT
14790	WT
18315	WT
14767.5	WT
15375	WT
15532.5	WT
14775	WT
17670	WT
24480	WT_api
16387.5	WT_api
17955	WT_api
16845	WT_api
18067.5	WT_api
19020	WT_api
25132.5	WT_api
20962.5	WT_api
22935	WT_api
15255	WT_api
17812.5	WT_api
15037.5	WT_api
14970	hepKO
17197.5	hepKO
16215	hepKO
15802.5	hepKO
19245	hepKO
11407.5	hepKO
11302.5	hepKO
26775	hepKO
14947.5	hepKO
14407.5	hepKO
15315	hepKO_api
20430	hepKO_api
20175	hepKO_api
22740	hepKO_api
23902.5	hepKO_api
30427.5	hepKO_api
28402.5	hepKO_api
21525	hepKO_api
21292.5	hepKO_api
29902.5	hepKO_api
24495	hepKO_api
29415	hepKO_api
p-value: 0.000367
	WT_api	WT	hepKO_api
WT	0.045059
hepKO_api	0.030861	0.000194
hepKO	0.030861	0.855643	0.000139

## Sheet: Fig4J
	Label	WT	WT	WT	WT	WT	WT	WT	WT	WT	WT	WT	WT	WT_api	WT_api	WT_api	WT_api	WT_api	WT_api	WT_api	WT_api	WT_api	WT_api	WT_api	WT_api	hepKO	hepKO	hepKO	hepKO	hepKO	hepKO	hepKO	hepKO	hepKO	hepKO_api	hepKO_api	hepKO_api	hepKO_api	hepKO_api	hepKO_api	hepKO_api	hepKO_api	hepKO_api	hepKO_api	hepKO_api	hepKO_api	Label
amino acid	DL-Lysine	-0.373966	0.0344472	0.500446	0.0318262	0.141762	0.77739	1.31736	-0.0534311	0.56433	0.0517916	-0.646595	-0.285507	-0.321659	-0.16536	-0.435062	-0.339821	-0.0181135	0.000205197	0.153133	-0.0651918	0.0298612	-0.21174	0.405892	0.546081	0.16164	-0.167841	0.0110444	-0.274504	0.586461	-0.369519	-0.278813	0.163453	-0.399258	-0.280876	0.195892	-0.38769	-0.487519	0.205844	0.0817042	-0.0963561	0.0649629	0.748023	0.495637	0.144847	0.19724	DL-Lysine	amino acid	DL-Lysine
amino acid	Glutamine	0.324003	-0.212707	0.576146	-0.184127	-0.141468	-0.140228	-0.122111	-0.0286218	0.242273	-0.276516	-0.705226	-0.136958	0.255602	0.122087	0.285726	0.953621	0.522591	0.336278	0.412476	-0.0183139	0.430067	0.512003	0.413056	0.185508	-0.118027	0.104628	0.248543	-0.277955	-0.0788727	-0.475797	-0.148526	-0.182989	-0.726749	0.327765	-0.0355785	0.611885	0.0817883	-0.149617	0.539194	0.549608	0.431569	-0.101853	-0.048378	-0.315759	-0.0317104	Glutamine	amino acid	Glutamine
amino acid	Phenylalanine	0.0337286	-0.00764698	-0.00764698	-0.349316	-0.00646449	-0.308996	-0.0847344	-0.0187911	0.664768	0.0168459	-0.233217	-0.0140057	0.0567027	-0.633539	0.167508	0.226175	-0.112919	-0.0276551	-0.106107	-0.0305176	0.926364	0.048291	0.868887	0.468941	-0.206992	-6.66e-05	-0.162221	-0.0872881	-0.383426	-0.4047	-0.0537328	-0.316683	-0.465224	-0.239583	0.0739378	-0.00764698	0.110996	-0.0986233	0.0123859	-0.0914274	0.544594	1.19157	0.00639206	-0.0468921	0.152228	Phenylalanine	amino acid	Phenylalanine
carbohydrate	Hexose-6-phosphate	-0.147659	0.0666214	-0.989632	0.314763	-0.498687	-0.412144	-0.789647	-0.504498	0.0620776	-0.240896	0.225216	-0.709645	-0.0677267	0.012218	0.00437212	0.23714	-0.657152	0.378347	0.129222	-0.0246501	0.39687	0.473963	0.522221	0.304278	-0.648022	0.0287985	-0.0156746	-0.213559	0.0748443	-0.137963	-0.669582	-0.755723	0.0816962	-0.187798	0.543229	0.894845	0.00690115	-0.117466	0.269377	0.316288	0.58058	0.304033	-0.449604	0.466271	-0.391457	Hexose-6-phosphate	carbohydrate	Hexose-6-phosphate
carbohydrate	Glycerol-3-phosphate	0.247487	-0.0980434	0.0850116	0.421805	0.526023	0.156257	0.17209	0.143664	-0.116458	-0.258545	0.0403388	0.060043	0.273154	0.0917434	0.192513	0.438028	-0.00948182	0.205155	-0.121184	0.0849161	-1.04791	-0.304427	-0.168112	-0.795473	-0.343238	0.350227	0.149983	0.337554	-0.25837	0.287549	0.287549	-0.105265	0.272539	-0.0956012	-0.0125855	-0.177155	0.095676	0.0749045	0.191132	-0.201961	-1.57693	-1.13063	-0.615549	0.187759	-0.240592	Glycerol-3-phosphate	carbohydrate	Glycerol-3-phosphate
carbohydrate	Myo-inositol or isomer	-0.150276	-0.294225	-0.155453	0.235837	0.0274528	0.0583537	-0.624418	-0.660573	-0.0370141	-0.555027	-0.390258	-0.295729	0.373885	-0.0617029	0.267182	0.667817	0.138264	0.402643	0.184095	0.00988875	0.269805	0.0456973	0.40402	0.379536	-0.277788	-0.457442	-0.0549601	-0.355505	-0.285669	-0.161344	-0.312485	-0.193891	-0.561139	0.338059	0.510799	0.336301	0.178369	0.0939399	0.0906789	0.312323	0.43618	0.994642	-0.0498339	-0.386192	-0.0617029	Myo-inositol or isomer	carbohydrate	Myo-inositol or isomer
carbohydrate	Phosphoenolpyruvate	0.697226	0.0914699	0.29771	-0.478959	0.164956	0.196557	0.398761	0.2873	-0.182983	0.495392	1.12626	-0.266849	-0.409791	-0.0603474	-0.880598	-0.480726	0.00508048	-0.0674188	0.179763	0.0326998	-0.497173	-0.151295	-0.516799	-0.85784	0.59563	-0.280264	0.239419	0.262039	0.0923697	0.45766	0.411576	0.0387158	0.584208	0.243997	-0.363291	-0.262327	0.48674	0.297527	-0.572164	-0.776983	-0.712091	-0.428636	-0.146912	-0.643597	-0.525029	Phosphoenolpyruvate	carbohydrate	Phosphoenolpyruvate
carbohydrate	UDP-D-hexose	-0.436354	-1.07198	-0.33338	-1.46649	-0.43629	-0.963978	-0.805761	0.23623	-1.4373	-0.738234	0.208536	0.17491	0.180355	0.890123	-0.492924	0.472452	0.663487	0.426886	0.362639	0.228258	-0.395623	0.674249	0.541181	0.248414	-0.0364818	-0.288965	-0.283247	-0.171707	-0.245761	0.23864	0.169476	-0.99381	-0.390739	0.686672	0.109803	0.37766	0.266659	0.364062	0.149935	0.562952	-1.01767	0.350198	0.363006	0.91458	0.481667	UDP-D-hexose	carbohydrate	UDP-D-hexose
Lipid	Acetyl-CoA	0.350851	-0.0459976	0.0334859	-0.480913	0.633033	-0.193929	-0.339129	-0.418434	-0.813072	-0.252067	-0.0793135	-0.0464177	-0.307289	0.903252	0.309795	-0.435263	0.507931	0.0671789	0.196638	0.352205	-1.29183	0.0436992	-0.659526	-0.751514	-0.0769967	-0.955873	-0.0110223	0.214856	0.356835	0.468577	0.352409	0.274089	0.104824	1.21354	0.203858	-0.113918	1.11858	0.629688	0.223826	-0.0889383	-1.30257	-1.00806	0.147234	-0.661729	-0.727409	Acetyl-CoA	Lipid	Acetyl-CoA
Lipid	Malic acid	0.080193	0.364087	-0.473681	-0.0441718	-0.195162	0.194482	0.708187	-0.0778893	0.176109	0.141429	0.903299	0.529952	0.11051	-0.755913	-0.0263327	-0.970996	0.0141634	0.0479111	0.378537	-0.00515536	-0.286397	0.0222693	-0.0219448	0.206536	0.405986	-0.258143	-0.0340808	-0.737764	0.302413	-0.0844083	-0.181507	0.0838967	0.297932	-0.107071	-0.621387	0.609677	-0.543539	-0.290087	-0.326181	0.182765	-1.00661	-0.481296	0.290105	0.188081	-0.58286	Malic acid	Lipid	Malic acid
TCA	alpha-ketoglutarate	-0.0239847	0.0139598	-0.128665	-0.19668	0.336134	-0.0755975	0.0996111	-0.179615	0.175308	0.0188167	0.599189	0.244222	-0.208647	-0.295523	-0.0239847	0.0685579	0.0758234	-0.0711435	0.400677	-0.0269978	-0.0880129	-0.0239847	-0.22533	0.236162	0.391162	0.279556	0.224608	-0.37323	-0.0239847	0.153299	0.237741	0.352358	0.0454029	-0.0239847	-0.181366	-0.221389	-0.0633225	0.0759191	-0.106775	0.398023	-0.733893	-0.143927	-0.44174	0.570321	-0.216378	alpha-ketoglutarate	TCA	alpha-ketoglutarate
TCA	Fumaric acid	-0.192919	0.0699775	-0.406166	0.256688	-0.199345	-0.00014876	1.12965	0.0995114	0.301084	0.37324	0.417942	0.47591	-0.137516	-0.648797	0.523893	0.263035	-0.0271537	0.186177	-0.216322	-0.204124	-0.209918	0.309427	0.127384	-0.649851	0.213153	-0.431917	0.279174	-0.186803	0.358948	0.512822	0.0704262	0.443856	0.293691	0.187351	-0.799459	0.271962	-0.446704	-0.113823	-0.0503428	-0.698484	-1.00774	-0.273029	-0.331152	-0.00766719	0.180381	Fumaric acid	TCA	Fumaric acid
TCA	Citric acid	-0.930556	-0.52742	-0.644897	-0.987721	-0.629246	-0.799488	0.0355072	0.377291	0.000486608	-0.0125665	0.0526031	0.0251717	0.488874	-0.033294	0.543205	0.257683	0.449433	0.191647	0.289425	-0.564459	0.532857	0.271845	0.414623	0.531895	0.303117	-0.0432914	-0.554345	-0.481181	-0.224945	-0.0840915	-0.29635	-0.139201	0.0616933	-0.193383	0.402865	0.860525	-0.192452	-0.137519	0.0186013	0.667551	0.745508	0.558588	0.0948734	0.566231	0.139774	Citric acid	TCA	Citric acid
TCA	NAD+	0.681114	0.360003	0.561659	-0.195785	0.624227	0.340093	-0.233167	-0.389602	-0.388715	-0.459898	-0.201223	0.289547	-0.405102	0.430641	0.482506	-0.490152	0.473589	0.374942	0.461897	0.384772	-1.3604	-0.589295	-0.942665	-1.27636	0.359262	-0.555339	0.656792	0.341338	-0.0990664	0.272453	0.236509	0.355869	-0.0759822	0.995548	0.168241	-0.532126	0.667055	0.275782	0.205455	-0.364356	-1.64967	-1.05963	0.202268	-0.849137	-0.452343	NAD+	TCA	NAD+
TCA	NADH	0.230418	0.239464	0.301782	-0.616579	-0.144789	0.439133	0.0652865	0.174535	-0.773603	0.070226	0.53721	0.548063	0.0893456	0.85781	0.455514	0.247226	0.939266	-0.132807	0.482346	1.28948	-1.07374	0.575973	-0.704036	-1.12746	0.442118	-0.0380652	0.507138	0.893429	0.0254609	0.293129	0.928085	0.658583	0.748157	1.40148	-0.797986	-0.544226	0.576819	0.77739	0.675562	-1.01902	-1.04754	-0.750937	0.0238545	-0.0430078	-0.301298	NADH	TCA	NADH
TCA	Succinic acid	0.257929	-0.342986	0.203454	0.393559	0.0594055	0.0944682	0.244403	-0.448242	-0.59209	-0.509698	-0.601929	0.306953	0.164196	0.506549	0.273121	0.306953	0.34778	0.554833	0.314275	0.0479132	-1.48585	-0.36098	-0.439229	-0.676065	-0.369476	-0.388986	0.164975	-0.385403	-0.347128	0.203096	0.493396	0.356699	0.0533615	-0.190027	0.0763204	0.187843	-0.252376	-0.0375661	0.0681354	-0.0303435	-1.37671	-0.91502	0.54899	-0.457489	0.190716	Succinic acid	TCA	Succinic acid
[truncated: 9 more columns]

## Sheet: Fig4_sup1A
Drink							y	g
							0.550811	WT
	WT	WT_api	hepKO	hepKO_api			0.553691	WT
	0	0.247788	0	0.227451			0.549759	WT
	0	0.229412	0	0.243871			0.541652	WT
	0	0.225108	0	0.150628			0.279374	WT
	0	0.207792	0	0.208264			0.512228	WT
	0	0.208264	0	0.240401			0.717172	WT
	0	0.264336	0	0.259136			0.666145	WT
	0	0.166282	0	0.333879			0.628348	WT_api
	0	0.209589	0	0.230769			0.528971	WT_api
	0		0	0.199061			0.50925	WT_api
	0		0	0.204334			0.491934	WT_api
	0		0	0.194495			0.400661	WT_api
	0		0	0.20479			0.52549	WT_api
	0		0	0.224757			0.495589	WT_api
	0		0	0.0128811			0.442123	WT_api
							0.559057	hepKO
mean	0	0.219821	0	0.224757			0.514547	hepKO
sem	0	0.0104651	0	0.0128811			0.521536	hepKO
							0.502963	hepKO
							0.586891	hepKO
Pellet							0.627296	hepKO
	WT	WT_api	hepKO	hepKO_api			0.591243	hepKO
	0.550811	0.38056	0.559057	0.366127			0.582	hepKO
	0.553691	0.299559	0.514547	0.361403			0.55021	hepKO
	0.549759	0.284141	0.521536	0.330267			0.598414	hepKO
	0.541652	0.284141	0.502963	0.336694			0.649102	hepKO
	0.279374	0.192397	0.586891	0.328731			0.604697	hepKO
	0.512228	0.261154	0.627296	0.281977			0.593578	hepKO_api
	0.717172	0.329307	0.591243	0.322275			0.605274	hepKO_api
	0.666145	0.232534	0.582	0.261154			0.480894	hepKO_api
			0.55021	0.276275			0.544959	hepKO_api
			0.598414	0.409923			0.569132	hepKO_api
			0.649102	0.404908			0.541113	hepKO_api
			0.604697	0.315105			0.656154	hepKO_api
	0.546354	0.282974	0.573996	0.332903			0.491923	hepKO_api
	0.0455284	0.0203418	0.0131048	0.0136097			0.475336	hepKO_api
							0.614257	hepKO_api
mean	0.546354	0.282974	0.573996	0.332903			0.599404	hepKO_api
sem	0.0455284	0.0203418	0.0131048	0.0136097			0.519895	hepKO_api
								p-value: 0.127137
	Pellet
	Drink	0	0.219821	0	0.224757
	Pellet	0.546354	0.282974	0.573996	0.332903
	sem	0	0.0104651	0	0.0128811
	sem	0.0455284	0.0203418	0.0131048	0.0136097

## Sheet: Fig4_sup1B
Serum TG
	WT	WT_api	hepKO	hepKO_api
	156.25	147.917	117.5	93.75
	173.75	79.5833	61.6667	181.25
	164.583	84.5833	107.5	145.833
	140	63.75	120.833	157.917
	84.5833	135.833	174.583	97.5
	121.667	139.167	157.083	157.5
	112.083	138.333	138.333	122.917
			77.0833	119.167
			84.1667	163.333
	136.131	112.738	125.357	136.667
	12.0407	13.2883	12.4685	10.2268
	g	y
	156.25	WT
	173.75	WT
	164.583	WT
	140	WT
	84.5833	WT
	121.667	WT
	112.083	WT
	147.917	WT_api
	79.5833	WT_api
	84.5833	WT_api
	63.75	WT_api
	135.833	WT_api
	139.167	WT_api
	138.333	WT_api
	117.5	hepKO
	61.6667	hepKO
	107.5	hepKO
	120.833	hepKO
	174.583	hepKO
	157.083	hepKO
	138.333	hepKO
	77.0833	hepKO
	84.1667	hepKO
	93.75	hepKO_api
	181.25	hepKO_api
	145.833	hepKO_api
	157.917	hepKO_api
	97.5	hepKO_api
	157.5	hepKO_api
	122.917	hepKO_api
	119.167	hepKO_api
	163.333	hepKO_api
	p-value: 0.252184
