# Supplementary material for: KLF10 integrates circadian timing and sugar signaling to coordinate hepatic metabolism
Source: eLife. 2021 Aug 17;10:e65574. doi: 10.7554/eLife.65574 (PMC8410083; doi:10.7554/eLife.65574)
Supplement: Figure 5—source data 1. [file elife-65574-fig5-data1.xlsx]

## Sheet: Fig5
Slc2a4
	ZT9					ZT15
	WT	WT_api	hepKO	hepKO_api		WT	WT_api	hepKO	hepKO_api
	2.35758	1.75849	6.63676	35.5094		1	3.21872	5.93477	18.7854
	1.00456	2.13176	11.736	51.6582		0.670384	2.44293	2.44876	15.9126
	1.21409	3.14609	1.93557	13.3751		1.31991	3.11584	2.57612	4.59288
	0.721451	4.6298	4.13199	25.3164		1.24945	1.15308	2.92607	30.6459
	0.908026	0.713625	1.15894	6.2109		1.40776	3.8762	0.758399	27.3131
	1.66935	0.838431	5.11986	17.0582		0.693294	2.26853	7.0859	14.0683
mean	1.31251	2.20303	5.11986	24.8547		1.0568	2.67922	3.62167	18.553
sem	0.247453	0.607227	1.55862	6.76343		0.13092	0.385921	0.974721	3.85141
	ZT9							ZT15
	y	g							y	g
	2.35758	WT	p-value: 0.001441						1	WT	p-value: 0.000895
	1.00456	WT		WT_api	WT	hepKO_api			0.670384	WT		WT_api	WT	hepKO_api
	1.21409	WT	WT	0.360102					1.31991	WT	WT	0.009802
	0.721451	WT	hepKO_api	0.000198	4.8e-05				1.24945	WT	hepKO_api	0.001474	4e-06
	0.908026	WT	hepKO	0.061441	0.012041	0.012041			1.40776	WT	hepKO	0.621647	0.00391	0.003168
	1.66935	WT							0.693294	WT
	1.75849	WT_api							3.21872	WT_api
	2.13176	WT_api							2.44293	WT_api
	3.14609	WT_api							3.11584	WT_api
	4.6298	WT_api							1.15308	WT_api
	0.713625	WT_api							3.8762	WT_api
	0.838431	WT_api							2.26853	WT_api
	6.63676	hepKO							5.93477	hepKO
	11.736	hepKO							2.44876	hepKO
	1.93557	hepKO							2.57612	hepKO
	4.13199	hepKO							2.92607	hepKO
	1.15894	hepKO							0.758399	hepKO
	5.11986	hepKO							7.0859	hepKO
	35.5094	hepKO_api							18.7854	hepKO_api
	51.6582	hepKO_api							15.9126	hepKO_api
	13.3751	hepKO_api							4.59288	hepKO_api
	25.3164	hepKO_api							30.6459	hepKO_api
	6.2109	hepKO_api							27.3131	hepKO_api
	17.0582	hepKO_api							14.0683	hepKO_api
Pklr
	ZT9					ZT15
	WT	WT_api	hepKO	hepKO_api		WT	WT_api	hepKO	hepKO_api
	1	1.07554	1.43273	2.33758		1	1.79314	0.530709	1.79316
	0.65392	1.52115	1.5623	3.79196		0.565732	1.75079	0.120534	1.88596
	1.69022	2.45051	1.82058	2.5776		1.4601	2.21467	0.993963	4.13822
	0.979024	2.38097	0.759236			1.19634	1.7139	1.14607	3.08348
	0.945539	2.51372	0.71584			1.10776	1.91821	0.0303509	3.95656
		2.80873				1.22221	1.69771	1.47249	2.02066
							1.86181
mean	1.05374	2.1251	1.25814	2.90238		1.09202	1.85004	0.715686	2.81301
sem	0.171047	0.27423	0.221623	0.450154		0.12234	0.0677115	0.237594	0.434526
	ZT9						ZT15
	y	g	p-value: 0.015020				y	g	p-value: 0.000205
	1	WT		WT_api	WT	hepKO_api	1	WT		WT_api	WT	hepKO_api
	0.65392	WT	WT_zt9	0.028901			0.565732	WT	WT	0.000127
	1.69022	WT	hepKO_api	0.558486	0.011516		1.4601	WT	hepKO_api	0.031174	2e-06
	0.979024	WT	hepKO	0.066212	0.558486	0.028901	1.19634	WT	hepKO	6e-06	0.184626	2.42724e-07
	0.945539	WT					1.10776	WT
	1.07554	WT_api					1.22221	WT
	1.52115	WT_api					1.79314	WT_api
	2.45051	WT_api					1.75079	WT_api
	2.38097	WT_api					2.21467	WT_api
	2.51372	WT_api					1.7139	WT_api
	2.80873	WT_api					1.91821	WT_api
	1.43273	hepKO					1.69771	WT_api
	1.5623	hepKO					1.86181	WT_api
	1.82058	hepKO					0.530709	hepKO
	0.759236	hepKO					0.120534	hepKO
	0.71584	hepKO					0.993963	hepKO
	2.33758	hepKO_api					1.14607	hepKO
	3.79196	hepKO_api					0.0303509	hepKO
	2.5776	hepKO_api					1.47249	hepKO
							1.79316	hepKO_api
							1.88596	hepKO_api
							4.13822	hepKO_api
							3.08348	hepKO_api
							3.95656	hepKO_api
							2.02066	hepKO_api
Pck1
	ZT9					ZT15
	WT	WT_api	hepKO	hepKO_api		WT	WT_api	hepKO	hepKO_api
	2.16	0.433396	2.36118	3.05102		1	0.497846	0.181851	2.06993
	3.84492	0.406425	2.32964	4.83535		1.72428	0.631276	1.17825	1.2236
	3.69939	0.929602	2.542	3.13655		1.54651	0.655443	0.952452	1.434
	1.66083	1.76057	2.90229			1.15324	0.352156	0.997802	1.30222
	2.11043		3.27478			0.528735	1.17454	0.52733	1.82829
						0.80739	1.12711		1.34824
mean	2.69511	0.882498	2.68198	3.67431		1.12669	0.739729	0.767537	1.53438
sem	0.448808	0.316434	0.179806	0.581045		0.18345	0.137442	0.181194	0.137648
	ZT9						ZT15
	y	g	p-value: 0.038531				y	g	p-value: 0.008938
	2.16	WT		WT_api	WT	hepKO_api	1	WT		WT_api	WT	hepKO_api
	3.84492	WT	WT_zt9	0.026542			1.72428	WT	WT	0.098213
	3.69939	WT	hepKO_api	0.007073	0.172163		1.54651	WT	hepKO_api	0.00381	0.093419
	1.66083	WT	hepKO	0.020921	0.728364	0.227935	1.15324	WT	hepKO	0.879626	0.124171	0.004174
	2.11043	WT					0.528735	WT
	0.433396	WT_api					0.80739	WT
	0.406425	WT_api					0.497846	WT_api
	0.929602	WT_api					0.631276	WT_api
	1.76057	WT_api					0.655443	WT_api
	2.39834	hepKO					0.352156	WT_api
	2.36118	hepKO					1.17454	WT_api
	2.542	hepKO					1.12711	WT_api
	2.90229	hepKO					0.181851	hepKO
	3.27478	hepKO					1.17825	hepKO
	3.05102	hepKO_api					0.952452	hepKO
	4.83535	hepKO_api					0.997802	hepKO
	3.13655	hepKO_api					0.52733	hepKO
							2.06993	hepKO_api
							1.2236	hepKO_api
							1.434	hepKO_api
							1.30222	hepKO_api
							1.82829	hepKO_api
							1.34824	hepKO_api
Fasn
	ZT9					ZT15
	WT	WT_api	hepKO	hepKO_api		WT	WT_api	hepKO	hepKO_api
	1.73	3.11635	1.65293	3.53777		1	7.11936	1.44124	9.48791
	2.09365	1.54724	1.29538	1.74207		1.69982	4.56344	2.94983	12.4379
	2.83381	2.62284	2.08275	1.84		1.82692	4.06849	3.02439	8.13451
	0.714625	1.36097	0.677125	2.1712		2.68146	6.90771	0.588223	9.50467
	0.876775	0.702696	1.0469	2.0608			5.75559		8.4641
		1.70227		1.0304
mean	1.64977	1.84206	1.35102	2.06371		1.80205	5.68292	2.00092	9.60581
sem	0.392265	0.359142	0.242518	0.33693		0.34493	0.609442	0.595601	0.75871
	ZT9						Z15
	y	g	p-value: 0.260808				y	g	p-value: 0.001957
	1.73	WT					1	WT		WT_api	WT	hepKO_api
	2.09365	WT					1.69982	WT	WT	0.000564
	2.83381	WT					1.82692	WT	hepKO_api	0.002474	4e-06
	0.714625	WT					2.68146	WT	hepKO	0.000832	0.74084	4e-06
	0.876775	WT					7.11936	WT_api
	3.11635	WT_api					4.56344	WT_api
	1.54724	WT_api					4.06849	WT_api
	2.62284	WT_api					6.90771	WT_api
	1.36097	WT_api					5.75559	WT_api
	0.702696	WT_api					1.44124	hepKO
	1.70227	WT_api					2.94983	hepKO
	1.65293	hepKO					3.02439	hepKO
	1.29538	hepKO					0.588223	hepKO
	2.08275	hepKO					9.48791	hepKO_api
	0.677125	hepKO					12.4379	hepKO_api
	1.0469	hepKO					8.13451	hepKO_api
	3.53777	hepKO_api					9.50467	hepKO_api
	1.74207	hepKO_api					8.4641	hepKO_api
	1.84	hepKO_api
	2.1712	hepKO_api
	2.0608	hepKO_api
	1.0304	hepKO_api
Elovl6
	ZT9	flox				ZT15
	WT	WT_api	hepKO	hepKO_api		WT	WT_api	hepKO	hepKO_api
	2.56425	2.98717	2.78211	5.20788		1	4.31626	1.29949	12.0043
	1.34078	3.16518	4.98446	3.25025		0.717272	5.30888	0.312574	5.34097
	1.46978	3.81706	1.45669	2.99129		2.03734	5.07165	1.45581	6.3909
	1.4509	8.19923	2.99631	1.94532		2.0086	4.90212	5.50603	15.4779
	1.85727	2.87421	2.20843	2.18737		1.64411	5.11756	0.844203	9.89741
	1.21332	1.96299		3.50857		1.36324	5.05802	1.30112	8.61442
							5.23		31.11
							4.83774
mean	1.64938	3.83431	2.8856	3.18178		1.46176	4.98028	1.78654	12.6908
sem	0.20308	0.906309	0.58858	0.475062		0.219148	0.109456	0.763269	3.32965
	ZT9							ZT15
	y	g					y	g
	2.56425	WT	p-value: 0.087045				1	WT	p-value: 0.000350
	1.34078	WT					0.717272	WT		WT_api	WT	hepKO_api
	4.40476	WT					2.03734	WT	WT	0.002214
	1.46978	WT					2.0086	WT	hepKO_api	0.002529	3e-06
	1.4509	WT					1.64411	WT	hepKO	0.002214	0.945359	3e-06
	1.85727	WT					1.36324	WT
	1.21332	WT					4.31626	WT_api
	2.98717	WT_api					5.30888	WT_api
	3.16518	WT_api					5.07165	WT_api
	3.81706	WT_api					4.90212	WT_api
	8.19923	WT_api					5.11756	WT_api
	2.87421	WT_api					5.05802	WT_api
	1.96299	WT_api					5.23	WT_api
	2.78211	hepKO					4.83774	WT_api
	4.98446	hepKO					1.29949	hepKO
	1.45669	hepKO					0.312574	hepKO
	2.99631	hepKO					1.45581	hepKO
	2.20843	hepKO					5.50603	hepKO
	5.20788	hepKO_api					0.844203	hepKO
	3.25025	hepKO_api					1.30112	hepKO
	2.99129	hepKO_api					12.0043	hepKO_api
	1.94532	hepKO_api					5.34097	hepKO_api
	2.18737	hepKO_api					6.3909	hepKO_api
	3.50857	hepKO_api					15.4779	hepKO_api
							9.89741	hepKO_api
							8.61442	hepKO_api

## Sheet: Fig5_sup1
Slc2a2				Slc2a5
WT	WT_api	hepKO	hepKO_api	WT	WT_api	hepKO	hepKO_api
1	1.29329	0.744212	1.01544	1	7.42684	1.73715	4.77229
1.13886	1.50779	0.185452	0.729194	0.956638	6.16294	0.720935	5.66726
0.884463	0.890937	0.922651	1.09191	1.15051	4.93643	2.76491	5.9899
0.754022	2.10232	0.30493	1.4522	2.18809	3.24378	4.69292	8.15757
1.10411	1.14557	0.452955	1.48737	1.98335	2.97258	1.05215	3.65123
0.992613		0.834706	1.15071	1.37019		1.79328
0.979011	1.38798	0.574151	1.15447	1.44146	4.94852	2.12689	5.64765
0.0581335	0.204868	0.123358	0.115986	0.213758	0.849337	0.588403	0.747301
y	g			y	g
1	WT			1	WT
1.13886	WT			0.956638	WT
0.884463	WT			1.15051	WT
0.754022	WT			2.18809	WT
1.10411	WT			1.98335	WT
0.992613	WT			1.37019	WT
1.29329	WT_api			7.42684	WT_api
1.50779	WT_api			6.16294	WT_api
0.890937	WT_api			4.93643	WT_api
2.10232	WT_api			3.24378	WT_api
1.14557	WT_api			2.97258	WT_api
0.744212	hepKO			1.73715	hepKO
0.185452	hepKO			0.720935	hepKO
0.922651	hepKO			2.76491	hepKO
0.30493	hepKO			4.69292	hepKO
0.452955	hepKO			1.05215	hepKO
0.834706	hepKO			1.79328	hepKO
1.01544	hepKO_api			4.77229	hepKO_api
0.729194	hepKO_api			5.66726	hepKO_api
1.09191	hepKO_api			5.9899	hepKO_api
1.4522	hepKO_api			8.15757	hepKO_api
1.48737	hepKO_api			3.65123	hepKO_api
1.15071	hepKO_api
	p-value: 0.006857			p-value: 0.002352
	WT_api	WT	hepKO_api		WT_api	WT	hepKO_api
WT	0.054121			WT	0.000762
hepKO_api	0.32285	0.250528		hepKO_api	0.633945	0.000505
hepKO	0.001434	0.054121	0.004917	hepKO	0.00212	0.513762	0.000917
		GcK				Khk				G6pc
		WT	WT_api	hepKO	hepKO_api	WT	WT_api	hepKO	hepKO_api	WT	WT_api	hepKO	hepKO_api
		1	1.30097	0.660104	2.31802	1	0.676335	1.07021	2.31751	1	1.41054	0.808016	1.30165
		0.681182	1.56835	0.476782	1.40712	0.54468	1.15296	1.38498	0.946646	0.468431	1.53209	0.148496	0.721951
		0.719026	1.0282	1.37383	0.917682	0.758563	0.932279	1.02865	0.93902	0.894933	1.50046	1.09147	1.18424
		0.737705	0.820188	1.66314	1.09795	0.774725	0.770589	0.770532	1.57561	0.990313	0.713513	0.761532	1.81752
		1.01186	1.68242	0.852993	1.42351	0.599849	2.25953	0.909291	1.12077	0.707033	1.23578	0.916666	1.49978
		0.958463	1.50753	0.557431	1.26859	0.424118	0.876973	0.675242	1.39808	0.604835	1.23211	0.98938	2.51243
mean		0.851372	1.31794	0.930715	1.40548	0.683656	1.11145	0.97315	1.38294	0.777591	1.27075	0.785927	1.50626
sem		0.0629058	0.137051	0.196424	0.198689	0.0832018	0.102629	0.238915	0.213457	0.0892354	0.122995	0.136534	0.249666
		y	g			y	g			y	g
		1	WT			1	WT			1	WT
		0.681182	WT			0.54468	WT			0.468431	WT
		0.719026	WT			0.758563	WT			0.894933	WT
		0.737705	WT			0.774725	WT			0.990313	WT
		1.01186	WT			0.599849	WT			0.707033	WT
		0.958463	WT			0.424118	WT			0.604835	WT
		1.30097	WT_api			0.676335	WT_api			1.41054	WT_api
		1.56835	WT_api			1.15296	WT_api			1.53209	WT_api
		1.0282	WT_api			0.932279	WT_api			1.50046	WT_api
		0.820188	WT_api			0.770589	WT_api			0.713513	WT_api
		1.68242	WT_api			2.25953	WT_api			1.23578	WT_api
		1.50753	WT_api			0.876973	WT_api			1.23211	WT_api
		0.660104	hepKO			1.07021	hepKO			0.808016	hepKO
		0.476782	hepKO			1.38498	hepKO			0.148496	hepKO
		1.37383	hepKO			1.02865	hepKO			1.09147	hepKO
		1.66314	hepKO			0.770532	hepKO			0.761532	hepKO
		0.852993	hepKO			0.909291	hepKO			0.916666	hepKO
		0.557431	hepKO			0.675242	hepKO			0.98938	hepKO
		2.31802	hepKO_api			2.31751	hepKO_api			1.30165	hepKO_api
		1.40712	hepKO_api			0.946646	hepKO_api			0.721951	hepKO_api
		0.917682	hepKO_api			0.93902	hepKO_api			1.18424	hepKO_api
		1.09795	hepKO_api			1.57561	hepKO_api			1.81752	hepKO_api
		1.42351	hepKO_api			1.12077	hepKO_api			1.49978	hepKO_api
		1.26859	hepKO_api			1.39808	hepKO_api			2.51243	hepKO_api
		KW	p-value: 0.045057			KW	p-value: 0.021821			p-value: 0.013969
			WT_api	WT	hepKO_api		WT_api	WT	hepKO_api		WT_api	WT	hepKO_api
		WT	0.063103			WT	0.114814			WT	0.019622
		hepKO_api	0.962811	0.063103		hepKO_api	0.114814	0.00678		hepKO_api	0.758767	0.019622
		hepKO	0.063103	0.962811	0.063103	hepKO	0.921399	0.114814	0.114814	hepKO	0.029075	0.758767	0.01962
		Acaca				Acly				Me1				Thrsp
		WT	WT_api	hepKO	hepKO_api	WT	WT_api	hepKO	hepKO_api	WT	WT_api	hepKO	hepKO_api	WT	WT_api	hepKO	hepKO_api
		1	4.02737	1.12567	4.60895	1	3.75678	1.14089	3.99724	1	3.39726	0.594679	6.71937	1	1.34277	2.3319	2.65144
		1.25271	3.82258	0.455792	6.10883	0.789343	4.31918	0.27474	5.80648	0.575786	2.57936	0.432516	3.73202	0.669354	1.84261	1.66503	2.02188
		3.28843	4.1659	2.84788	5.25243	2.28866	3.32677	2.14699	7.75874	1.70909	3.03397	1.19061	3.34017	0.634985	1.98161	2.51986	1.98683
		2.69584	4.16708	2.31941	10.741	1.81458	3.81226	1.53077	5.9836	1.07204	2.51068	2.39949	5.0487	1.13438	1.0772	1.72319	2.32513
		2.36743	4.37339	1.19375	8.88498	2.00544	4.01075	0.770405	5.55335	0.778594	3.24243	0.0676216	4.56224	1.68258	1.05667	0.846517	2.8963
		3.12267	4.52701	2.85543	6.86907	2.08433	2.6373	1.85829		0.988327	2.63295	1.29056	6.24243	1.67754	1.83056	0.573234	1.8089
mean		2.28785	4.18055	1.79966	7.07755	1.66373	3.64384	1.28701	5.81988	1.02064	2.89944	0.995913	4.94082	1.13314	1.5219	1.60995	2.28175
sem		0.391619	0.101525	0.412752	0.950348	0.252459	0.24121	0.285089	0.599134	0.156478	0.153641	0.338372	0.548806	0.18967	0.168894	0.317417	0.172658
		y	g			y	g			y	g			y	g
		1	WT			1	WT			1	WT			1	WT
		1.25271	WT			0.789343	WT			0.575786	WT			0.669354	WT
		3.28843	WT			2.28866	WT			1.70909	WT			0.634985	WT
		2.69584	WT			1.81458	WT			1.07204	WT			1.13438	WT
		2.36743	WT			2.00544	WT			0.778594	WT			1.68258	WT
		3.12267	WT			2.08433	WT			0.988327	WT			1.67754	WT
		4.02737	WT_api			3.75678	WT_api			3.39726	WT_api			1.34277	WT_api
		3.82258	WT_api			4.31918	WT_api			2.57936	WT_api			1.84261	WT_api
		4.1659	WT_api			3.32677	WT_api			3.03397	WT_api			1.98161	WT_api
		4.16708	WT_api			3.81226	WT_api			2.51068	WT_api			1.0772	WT_api
		4.37339	WT_api			4.01075	WT_api			3.24243	WT_api			1.05667	WT_api
		4.52701	WT_api			2.6373	WT_api			2.63295	WT_api			1.83056	WT_api
		1.12567	hepKO			1.14089	hepKO			0.594679	hepKO			2.3319	hepKO
		0.455792	hepKO			0.27474	hepKO			0.432516	hepKO			1.66503	hepKO
		2.84788	hepKO			2.14699	hepKO			1.19061	hepKO			2.51986	hepKO
		2.31941	hepKO			1.53077	hepKO			2.39949	hepKO			1.72319	hepKO
		1.19375	hepKO			0.770405	hepKO			0.0676216	hepKO			0.846517	hepKO
		2.85543	hepKO			1.85829	hepKO			1.29056	hepKO			0.573234	hepKO
		4.60895	hepKO_api			3.99724	hepKO_api			6.71937	hepKO_api			2.65144	hepKO_api
		6.10883	hepKO_api			5.80648	hepKO_api			3.73202	hepKO_api			2.02188	hepKO_api
		5.25243	hepKO_api			7.75874	hepKO_api			3.34017	hepKO_api			1.98683	hepKO_api
		10.741	hepKO_api			5.9836	hepKO_api			5.0487	hepKO_api			2.32513	hepKO_api
		8.88498	hepKO_api			5.55335	hepKO_api			4.56224	hepKO_api			2.8963	hepKO_api
		6.86907	hepKO_api							6.24243	hepKO_api			1.8089	hepKO_api
		KW	p-value: 0.000198			KW	p-value: 0.000418			KW	p-value: 0.000247			KW	p-value: 0.016800
			WT_api	WT	hepKO_api		WT_api	WT	hepKO_api		WT_api	WT	hepKO_api		WT_api	WT	hepKO_api
		WT	0.00016			WT	0.000233			WT	8.9e-05			WT	0.211282
		hepKO_api	0.00211	1.58148e-07		hepKO_api	0.022763	3e-06		hepKO_api	0.00552	2.14041e-07		hepKO_api	0.037775	0.004499
		hepKO	1.4e-05	0.243249	3.63144e-08	hepKO	2.6e-05	0.273158	8.00114e-07	hepKO	7.7e-05	0.853044	2.14041e-07	hepKO	0.915049	0.211282	0.037775
