# Supplementary material for: KLF10 integrates circadian timing and sugar signaling to coordinate hepatic metabolism
Source: eLife. 2021 Aug 17;10:e65574. doi: 10.7554/eLife.65574 (PMC8410083; doi:10.7554/eLife.65574)
Supplement: Figure 6—source data 1. [file elife-65574-fig6-data1.xlsx]

## Sheet: DGE_WT_down
Differentially expressed genes in WT and HepKO hepatocytes challenged with high sugar compared to unchallenged cells.
Gene	log2FC	logCPM	F	P-Value	FDR
Slc16a5	-4.00041	4.31757	222.679	5.86158e-09	8.20211e-05
Cbs	-2.23071	6.98992	111.108	2.59874e-07	0.000360185
Zfp771	-1.4984	4.90757	94.9696	5.95284e-07	0.000458007
Shisa5	-1.25761	4.39941	69.1322	3.05478e-06	0.00142485
Mtmr4	-1.14713	5.84745	66.359	3.75452e-06	0.00159203
Atf6b	-1.27947	4.93384	65.4195	4.03305e-06	0.00165984
Selenoo	-1.02051	5.38113	63.5099	4.67745e-06	0.0018181
Ogfrl1	-1.36907	3.80396	62.653	5.00538e-06	0.00184317
Dcaf11	-1.54663	6.86026	60.4553	5.97747e-06	0.00199149
Ppm1k	-1.62795	5.09064	59.2053	6.62874e-06	0.00213197
Pck1	-5.39592	4.89	58.5148	7.02406e-06	0.00218417
Pdlim1	-0.827409	4.99194	56.8739	8.07968e-06	0.00230733
Cnpy2	-1.15232	5.19984	55.6731	8.97094e-06	0.00232464
Pdp1	-1.58824	3.33155	55.2172	9.33913e-06	0.00233362
Ivd	-1.6016	6.07816	52.8365	1.15756e-05	0.00263055
Ggt6	-2.45663	4.58895	52.7618	1.16554e-05	0.00263055
Neu2	-4.77489	1.21445	46.2485	2.19323e-05	0.00389037
Bcl2	-1.92662	2.44829	45.4102	2.39161e-05	0.00411822
Adtrp	-1.16603	4.6826	44.464	2.64132e-05	0.00434824
Mtmr14	-1.04971	4.56144	43.9765	2.78187e-05	0.00441756
Tns2	-0.955061	6.45615	43.779	2.84128e-05	0.00441756
Bbc3	-1.50561	5.14253	43.6439	2.88279e-05	0.00443284
Tat	-3.31562	8.6466	43.0173	3.08482e-05	0.00453105
Gmcl1	-0.765441	4.67129	42.4678	3.27578e-05	0.00467734
Rab29	-1.55507	3.5371	41.7115	3.56171e-05	0.00483874
Ank3	-1.76385	4.38581	41.2987	3.73008e-05	0.00501876
Hpn	-1.33804	7.14531	40.32	4.16798e-05	0.00520736
Eci2	-0.962255	4.62608	39.7596	4.44582e-05	0.0054096
Mbl2	-0.968243	8.06964	39.0698	4.81815e-05	0.00562224
Mut	-0.814889	6.42995	38.9781	4.8704e-05	0.00562224
Uaca	-1.01256	4.6101	38.8421	4.94903e-05	0.00562224
Klf12	-1.04758	5.27992	38.7855	4.98219e-05	0.00562224
Llgl2	-0.911785	4.58065	38.4251	5.19961e-05	0.00577292
Frat2	-2.34906	1.67582	38.0247	5.45433e-05	0.005782
Sdf2l1	-0.956017	4.20934	37.7299	5.6513e-05	0.00590139
Chst13	-1.22904	3.1856	37.632	5.7185e-05	0.00592734
Sgsh	-1.31581	3.72607	36.7415	6.37508e-05	0.00644558
Cpt1a	-1.5013	6.53793	36.7064	6.40274e-05	0.00644558
Etl4	-0.913932	5.78698	35.8536	7.11958e-05	0.00696674
Nde1	-0.957127	4.35822	35.5334	7.41266e-05	0.00705786
Tmem123	-1.09309	6.51279	35.347	7.58987e-05	0.00712786
Rnf144a	-1.71062	2.2624	35.2236	7.7099e-05	0.00719231
Echs1	-0.683348	6.83363	34.9663	7.96734e-05	0.00731398
Wdfy2	-0.604774	5.75895	34.9527	7.98122e-05	0.00731398
Scly	-0.903292	5.43384	34.9372	7.99713e-05	0.00731398
Fbxo31	-0.836844	5.51641	34.4889	8.47237e-05	0.00764863
Prr16	-1.09289	5.32784	34.2711	8.7151e-05	0.00776754
Epb41	-0.782637	7.69097	34.2206	8.77259e-05	0.00776929
Bivm	-0.770543	5.14559	34.0538	8.9655e-05	0.0078902
Abat	-2.30864	5.63916	33.6073	9.50689e-05	0.00826272
Trp53inp2	-1.21121	7.93932	33.5167	9.62147e-05	0.00831069
Lgals3bp	-1.1489	6.12399	33.2898	9.9154e-05	0.00844087
Crebrf	-1.48423	4.7474	33.0907	0.00010182	0.00844087
Gcnt4	-1.6543	3.01303	32.9631	0.000103572	0.00844087
Oplah	-1.30972	5.27769	32.9197	0.000104177	0.00844087
Decr2	-1.01788	5.46334	32.828	0.000105468	0.00848166
Acadsb	-0.690511	6.93948	32.5885	0.000108927	0.00865549
Fbxl21	-2.79598	0.190247	32.4134	0.00011154	0.008671
Mt2	-1.71549	3.29193	32.0009	0.000117994	0.00888007
Sesn3	-0.922639	7.13825	31.9693	0.000118505	0.00888007
Slc35d1	-1.04523	7.94122	31.592	0.000124827	0.00909742
Tbc1d32	-1.52814	2.8618	31.3471	0.000129141	0.00931477
Dock1	-0.811792	3.6501	31.2856	0.000130253	0.00931731
Ptges2	-0.596984	4.96517	31.1601	0.000132553	0.00941532
Ctso	-0.697942	5.7622	30.474	0.000146015	0.0102159
Clba1	-1.48973	1.61685	30.3272	0.000149099	0.0102803
Pcca	-1.32264	2.81553	30.0398	0.000155362	0.0105023
Tm2d2	-0.787724	5.77176	29.7405	0.000162214	0.0107069
Fam214b	-1.0742	5.44019	28.7368	0.000187931	0.0119533
Prrc1	-0.656952	5.70665	28.6071	0.000191591	0.0121309
Gnptab	-0.727149	4.86536	28.5356	0.000193646	0.012137
Echdc3	-0.869958	5.36703	28.4632	0.00019575	0.012137
Acbd4	-0.916429	4.94173	28.2744	0.00020137	0.0121873
Rnf141	-0.600257	7.15332	28.223	0.000202933	0.0121873
Lrrcc1	-1.43072	2.36379	27.8395	0.00021505	0.0127551
Map3k13	-1.23596	6.23288	27.6496	0.000221363	0.0130149
Cyp2r1	-0.867423	4.19596	27.4703	0.000227522	0.0132104
Sfxn2	-1.19131	4.7705	27.3876	0.000230434	0.0132742
Cbx2	-1.33212	3.43949	27.3852	0.000230518	0.0132742
Selenos	-0.658133	6.07277	27.2698	0.000234653	0.0134021
Ube2l6	-1.00637	6.04903	27.0073	0.000244385	0.0137337
Naga	-0.822836	4.24881	26.8693	0.000249694	0.0139202
Tctn3	-1.92837	1.08707	26.7659	0.00025376	0.0140561
Kyat1	-2.01559	6.29062	26.6919	0.000256718	0.0141427
Tsc22d4	-0.887346	4.70734	26.503	0.00026445	0.0144321
Asb7	-0.899757	4.50137	26.4883	0.000265065	0.0144321
Ephb4	-1.43224	3.70038	26.4298	0.000267521	0.0144533
Mblac2	-1.64913	4.34412	26.4002	0.000268774	0.0144652
Upb1	-1.33993	5.00686	26.3196	0.000272221	0.0145768
Lgalsl	-0.820721	5.93477	26.2734	0.000274218	0.0145768
Ppp1r16a	-0.810504	4.90845	26.1975	0.000277541	0.0146277
Trim37	-0.771364	4.52351	26.1857	0.000278065	0.0146277
Dolpp1	-0.77343	3.99582	26.1384	0.000280161	0.014628
AW011738	-1.84918	0.867839	26.0709	0.000283192	0.0147147
Klf15	-2.25809	6.30538	26.0546	0.000283926	0.0147147
Nostrin	-1.27924	1.98437	25.9879	0.000286967	0.014763
Rnf34	-1.16309	4.01905	25.8002	0.000295728	0.0151026
Slc6a12	-0.929915	5.23339	25.5966	0.000305584	0.0154369
Mettl7b	-1.44486	8.18296	25.4994	0.000310424	0.0155691
Nrbp1	-0.770743	4.76892	25.4716	0.000311828	0.0155836
Stambp	-1.12693	4.05015	25.4276	0.000314059	0.0155838
Lysmd4	-1.04493	4.2324	25.3925	0.000315858	0.0156177
AA986860	-2.65048	4.45981	25.2861	0.000321369	0.0157983
Irx3	-2.15144	1.34699	25.2785	0.00032177	0.0157983
Igfbp4	-1.03689	9.91841	25.1701	0.000327514	0.0159128
Gjb2	-2.15585	7.79826	25.0468	0.000334195	0.0159344
Ngef	-2.29771	2.94446	24.9717	0.000338342	0.0159947
Apcs	-1.3075	6.99901	24.9025	0.000342217	0.0160974
Crot	-1.05201	6.66575	24.8478	0.000345316	0.0161067
Fads6	-0.632394	8.14368	24.7721	0.000349658	0.016255
Inpp5b	-0.718367	4.67571	24.6963	0.000354071	0.0164057
Abhd17a	-0.984801	6.09885	24.6471	0.000356975	0.0164768
Alkbh7	-1.3076	3.24503	24.52	0.000364593	0.0165641
Serpinb9	-1.23503	4.27126	24.324	0.00037673	0.0168961
Arhgef5	-0.570546	7.64386	24.2531	0.000381231	0.0169893
Nr2f6	-0.739235	7.12449	23.9601	0.000400534	0.0176804
Svip	-0.923485	4.2312	23.7814	0.000412866	0.0181026
Arhgef19	-1.69993	5.42292	23.701	0.000418562	0.0181892
Smarca2	-1.19024	5.81328	23.5673	0.000428239	0.0184091
Tyk2	-0.684352	5.10802	23.3862	0.00044176	0.0187357
Fam110a	-1.52991	3.46754	23.3719	0.000442853	0.0187357
Tcf3	-0.758592	4.22156	23.35	0.000444526	0.0187357
Snx21	-0.810305	3.93619	23.0878	0.000465156	0.0192224
Nudt7	-1.24168	5.71311	23.0812	0.00046569	0.0192224
Ndrg2	-0.976477	7.10231	22.9033	0.000480355	0.0194802
Mgam	-0.969162	4.30675	22.9006	0.000480581	0.0194802
Ripor1	-0.706146	5.11618	22.8694	0.000483205	0.0194802
Wdr19	-1.80338	1.13347	22.8112	0.000488158	0.0194802
Abhd12	-0.706999	5.00276	22.8071	0.000488505	0.0194802
Pim1	-1.18364	3.69899	22.7778	0.000491025	0.0194802
Klhdc8a	-2.74225	0.115137	22.7354	0.000494692	0.0194802
Sptssa	-0.757217	5.60316	22.6552	0.000501711	0.0195555
Lin52	-0.909421	2.92772	22.6189	0.000504934	0.0196265
Prr13	-0.539628	5.82767	22.5504	0.000511072	0.0197159
Ift122	-1.11085	2.38105	22.5461	0.000511462	0.0197159
Slc25a38	-0.797085	4.22372	22.2787	0.0005363	0.0202276
Lztr1	-0.523317	6.0953	22.1916	0.000544689	0.0204151
Rhobtb2	-1.23637	3.20262	22.0799	0.000555686	0.0205867
Pctp	-0.688867	5.49995	22.0689	0.000556782	0.0205867
Amer1	-0.748955	3.60781	22.0574	0.000557928	0.0205867
Nfkbib	-0.868684	5.09573	22.0461	0.000559061	0.0205867
B3galt1	-4.81342	0.595408	21.7636	0.000588253	0.0213336
Dbt	-0.879308	6.85677	21.7466	0.000590059	0.0213336
Psen2	-1.16543	5.2636	21.6457	0.000600965	0.0214741
Cbln3	-1.8425	2.64336	21.3949	0.000629084	0.0222077
Mpst	-0.507658	6.57549	21.3719	0.000631737	0.0222077
Dnajc30	-1.17591	3.8016	21.359	0.000633237	0.0222077
Prkcz	-1.02997	3.55573	21.3361	0.000635902	0.0222454
Serpina10	-1.09541	7.77775	21.068	0.000668096	0.0230831
Orai3	-1.12338	5.33443	20.8428	0.000696628	0.0238335
Gstp-ps	-0.722354	11.5458	20.8165	0.000700043	0.023892
G0s2	-1.45449	3.35984	20.7312	0.000711287	0.0241533
Pbxip1	-0.620693	5.88482	20.6527	0.000721828	0.0242219
Aldh4a1	-1.24489	5.59661	20.4778	0.000745967	0.024596
Dlg3	-0.941137	4.1634	20.4701	0.000747039	0.024596
Sec16b	-1.56613	5.36466	20.1686	0.000790995	0.0254446
Hfe	-0.691523	6.13669	20.0541	0.000808471	0.0258286
Ing1	-1.18858	4.80054	19.9749	0.000820835	0.0260452
Mccc2	-0.937507	3.54756	19.9067	0.000831645	0.0262099
Txndc16	-1.92067	0.946277	19.8849	0.000835143	0.026261
Slc17a5	-0.560194	5.87697	19.8398	0.000842417	0.0263057
Zfp608	-1.69887	1.77687	19.7701	0.000853821	0.0264914
Vps26c	-0.647755	5.43395	19.7471	0.000857616	0.0264914
Smo	-1.11874	3.51396	19.7175	0.000862544	0.0265332
Hemk1	-0.755969	3.92503	19.7162	0.000862759	0.0265332
D10Jhu81e	-1.20412	4.84603	19.6988	0.000865666	0.0265642
Ninj1	-0.487354	6.4999	19.6009	0.000882261	0.0269552
Pros1	-0.614452	5.26876	19.5867	0.000884693	0.0269706
Thtpa	-0.74071	4.92673	19.4961	0.000900426	0.0272131
Nit1	-0.591116	6.75436	19.424	0.000913183	0.0275166
Chst12	-2.23446	1.73684	19.3876	0.000919713	0.0276171
Csnk1g2	-0.651039	6.56521	19.3596	0.000924758	0.0277091
Wdr5b	-1.49945	2.51486	19.294	0.000936738	0.0279484
Hscb	-1.44603	1.61716	19.27	0.000941153	0.0279608
Cptp	-0.843587	5.13513	19.2515	0.000944574	0.028003
Endod1	-2.30551	5.60589	19.1388	0.00096577	0.0284194
Tsku	-2.21619	9.50977	19.1274	0.000967948	0.0284194
Vav2	-0.486913	5.82743	19.1231	0.000968774	0.0284194
Dop1b	-0.72572	6.55795	19.0939	0.000974384	0.0285021
Ssx2ip	-0.980908	3.58121	19.059	0.000981123	0.0285021
Mib2	-1.08559	4.61555	19.0452	0.000983813	0.0285021
Ppp4r4	-1.28733	3.90806	18.9883	0.000994959	0.0287061
Tmem175	-1.01293	3.08003	18.7871	0.0010356	0.0292318
Acox2	-1.01353	6.14056	18.7871	0.00103561	0.0292318
Isoc2a	-0.789569	3.94612	18.7816	0.00103675	0.0292318
Cabin1	-0.671476	5.45227	18.7744	0.00103825	0.0292318
Zfp28	-1.37246	1.40458	18.7432	0.00104474	0.0292605
Gda	-1.05183	3.49455	18.7426	0.00104487	0.0292605
B4galnt1	-0.500505	6.89076	18.7313	0.00104723	0.0292605
Hdac11	-0.953153	3.39643	18.7199	0.00104961	0.0292605
Mmab	-0.908405	4.52681	18.7053	0.00105268	0.0292723
Amz2	-0.808875	4.51561	18.5953	0.00107617	0.0295853
Fam234b	-0.701836	5.51077	18.5801	0.00107948	0.0296179
Sri	-0.679118	5.64182	18.519	0.00109283	0.029809
Mpv17l2	-0.809775	4.30238	18.4962	0.00109788	0.0298884
Klf3	-0.719119	7.56355	18.4344	0.00111166	0.0302047
Katnb1	-1.51159	1.57808	18.3326	0.00113482	0.0307572
Pid1	-1.47974	7.03711	18.2295	0.00115886	0.0310649
Myl12b	-0.879281	4.04906	18.1732	0.00117225	0.0312444
Atpif1	-0.610103	4.33516	18.1199	0.00118507	0.0312881
Sema4g	-1.62968	7.23157	18.113	0.00118674	0.0312881
Plekha3	-0.514893	5.18814	18.1015	0.00118954	0.0312881
Sqor	-0.93997	6.09706	18.0164	0.00121047	0.0316009
Tmem220	-0.759513	3.82631	17.7895	0.0012684	0.0323831
Tcaim	-0.927906	4.33989	17.7566	0.00127708	0.0324913
Ilvbl	-0.504157	5.05032	17.7303	0.00128406	0.0325503
Alg6	-0.713334	3.04798	17.7259	0.00128523	0.0325503
Hdac3	-0.461361	5.08673	17.7169	0.00128763	0.0325503
Nt5dc1	-0.597328	4.49821	17.7042	0.00129103	0.0325503
St5	-0.842735	5.23262	17.6272	0.00131186	0.0327802
L2hgdh	-0.521906	5.7739	17.6091	0.00131681	0.0328143
Tpcn1	-1.0012	5.24917	17.5983	0.00131978	0.0328143
Fadd	-0.699561	4.64172	17.5423	0.00133529	0.0329043
Zfyve21	-0.95703	4.63756	17.4979	0.00134772	0.0331435
Ift52	-0.677121	3.90556	17.4799	0.00135282	0.0331873
Acsl4	-0.902208	7.88301	17.4665	0.00135662	0.0331873
Pus10	-0.674415	4.32435	17.4462	0.00136239	0.0332359
Wrn	-0.625218	3.70019	17.4384	0.00136461	0.0332359
Edem1	-0.48756	7.31678	17.4345	0.00136573	0.0332359
Galk2	-0.715013	3.85109	17.4048	0.00137426	0.0333855
Prox2	-0.993911	1.88109	17.3417	0.00139261	0.033656
Siva1	-1.06661	1.21722	17.324	0.00139781	0.0336655
Ip6k2	-0.914277	7.01515	17.324	0.00139782	0.0336655
Fah	-1.45625	3.81971	17.3042	0.00140363	0.0336955
Helz2	-0.66344	7.36449	17.279	0.0014111	0.0336955
Thap6	-0.684451	4.25904	17.2328	0.00142493	0.0339678
Acat1	-0.812848	4.336	17.0936	0.00146755	0.034747
Myh14	-0.995279	2.90679	17.0138	0.00149268	0.0349366
Slc11a1	-2.72931	0.253589	17.0048	0.00149554	0.0349366
Sstr2	-3.47928	3.5174	16.9961	0.00149831	0.0349405
Ugt2b35	-1.09282	8.78883	16.9886	0.0015007	0.0349405
Prune1	-0.584714	5.93171	16.9766	0.00150454	0.0349719
Cdk19	-0.920394	3.40875	16.9467	0.00151417	0.0350745
Tfb1m	-1.15842	2.45435	16.9396	0.00151648	0.0350745
Itih5	-0.595937	5.18548	16.8678	0.00153993	0.0353869
Gjb1	-1.45069	7.68146	16.8644	0.00154103	0.0353869
Hltf	-0.885749	3.37995	16.6806	0.00160312	0.0360893
A1cf	-1.28202	5.57012	16.6731	0.00160571	0.0360893
Dynll2	-0.527552	8.8506	16.6518	0.00161311	0.0361649
Fkbp5	-0.720641	8.25466	16.5824	0.00163749	0.0364282
Manea	-0.629143	5.32992	16.5678	0.00164266	0.0364853
Nipsnap1	-0.736327	6.3908	16.4519	0.00168448	0.0371542
Slc22a18	-0.905814	5.47343	16.4511	0.00168477	0.0371542
Dcxr	-1.2457	2.33981	16.4476	0.00168605	0.0371542
Trmt2b	-0.662972	4.39237	16.3774	0.00171203	0.0374908
Creld1	-0.868458	5.30951	16.3721	0.00171404	0.0374908
Ube2u	-3.01708	-0.150428	16.3637	0.00171718	0.0374908
Ndufaf3	-1.51573	2.18456	16.305	0.00173932	0.0378512
Ndufaf7	-0.773165	3.58476	16.2956	0.00174289	0.0378701
Irak4	-0.695106	3.68535	16.2538	0.00175893	0.0381002
Aamp	-0.614041	6.33237	16.2077	0.0017768	0.0383008
Fbf1	-0.814437	4.40777	16.1638	0.00179402	0.0384438
Tmem203	-0.741104	3.20499	16.1393	0.0018037	0.0384982
Crybg1	-0.926684	5.78498	16.1365	0.00180482	0.0384982
Tmem205	-0.701315	6.46799	16.1296	0.00180757	0.0384982
Ccdc28a	-1.09692	3.55625	16.0611	0.00183508	0.0387305
Mlh3	-0.53919	5.88916	16.0293	0.001848	0.0388166
Slc35e1	-0.476629	7.20817	15.9671	0.00187365	0.0391312
Gck	-1.7931	7.04601	15.9462	0.00188232	0.039224
Cutal	-0.469296	6.83294	15.941	0.00188451	0.039224
Oas1c	-2.70345	0.152046	15.8862	0.00190757	0.039572
Gsap	-0.927305	3.06927	15.8663	0.00191603	0.039572
Syt1	-3.58074	-0.36627	15.8645	0.00191679	0.039572
Bcas3	-1.39664	3.43123	15.8631	0.00191738	0.039572
Fbxw7	-0.560192	4.86355	15.8191	0.00193627	0.0397382
C1qtnf6	-1.88453	4.77977	15.8109	0.00193981	0.0397382
Aph1b	-1.35536	2.24894	15.81	0.0019402	0.0397382
Nipal3	-1.16944	4.4011	15.8091	0.00194061	0.0397382
Idh2	-0.684439	5.04231	15.8084	0.00194088	0.0397382
Perp	-0.464458	8.5835	15.8048	0.00194246	0.0397382
Nr1i2	-1.31339	6.17521	15.768	0.00195844	0.0399004
Pdia4	-0.606066	6.58937	15.7589	0.00196247	0.0399004
Lyplal1	-0.715009	4.33892	15.7539	0.00196465	0.0399004
Hps4	-1.11289	3.6894	15.7425	0.00196964	0.0399071
Aldh9a1	-0.630422	6.39843	15.7337	0.00197354	0.0399071
Piga	-0.741097	4.58022	15.7205	0.00197936	0.0399672
Msi2	-1.1757	5.40811	15.6996	0.00198866	0.0399818
Cdk4	-0.578608	5.25794	15.6675	0.00200301	0.0400974
Panx1	-1.72923	1.42446	15.6411	0.00201488	0.0402472
Scn1b	-1.29708	3.89449	15.6256	0.00202193	0.0402472
Mt1	-1.49656	9.00445	15.6105	0.00202877	0.0402472
Mknk2	-0.711668	7.93492	15.5537	0.00205489	0.0403075
Aldh1b1	-1.11539	3.32363	15.5369	0.00206269	0.0403117
Mettl21a	-0.535704	4.45965	15.5088	0.00207576	0.0404541
Zfp551	-1.97458	0.466309	15.4411	0.00210777	0.0406779
Babam1	-0.391713	6.19083	15.4203	0.00211769	0.0407264
Klf13	-0.788081	8.30691	15.418	0.00211883	0.0407264
Sspn	-1.61113	0.617794	15.3674	0.00214325	0.0409706
Atp11c	-0.67365	5.62234	15.3379	0.00215764	0.0410249
Enpp5	-1.09621	5.35288	15.3361	0.00215851	0.0410249
Slc10a7	-0.640582	3.58456	15.2594	0.00219655	0.0415357
Trafd1	-0.875965	5.20234	15.2513	0.0022006	0.041553
Amdhd2	-0.62993	4.83336	15.2315	0.00221055	0.041553
Cep19	-1.16706	3.08449	15.1758	0.00223887	0.0417157
Rtn4ip1	-0.735065	5.18433	15.121	0.0022671	0.0419931
Cbr4	-0.587606	4.91087	15.0876	0.00228454	0.0421464
Ankzf1	-0.692936	4.73152	15.0836	0.00228661	0.0421464
Egln2	-0.956275	6.39389	15.0789	0.00228909	0.0421464
Btbd2	-0.57233	5.07483	15.031	0.00231443	0.0424454
Zfp41	-1.7688	2.1883	14.9959	0.00233317	0.0426214
Zfp446	-0.868504	3.08178	14.9544	0.00235563	0.0429602
Foxred1	-0.649834	4.88868	14.8937	0.00238886	0.0433559
Tob1	-0.736155	7.99174	14.8615	0.00240675	0.0435674
Naip2	-0.968315	3.78933	14.8497	0.00241333	0.0436302
Klhl13	-0.855187	3.0198	14.8409	0.00241827	0.043663
Azgp1	-0.617093	10.3502	14.6661	0.00251861	0.0450519
Tceal8	-0.715461	4.61825	14.6473	0.00252965	0.0450519
Ell3	-5.09236	-1.81679	16.3136	0.00253347	0.0450519
Snx10	-0.623883	6.65511	14.6407	0.00253355	0.0450519
Mccc1	-0.728322	3.71312	14.6403	0.00253382	0.0450519
Zfp808	-3.04078	-0.816688	14.6036	0.00255565	0.0453823
Hfe2	-1.99705	5.91981	14.5562	0.00258417	0.0457147
Dsn1	-1.36094	1.32461	14.5279	0.00260138	0.0459609
Fyco1	-0.62766	6.16476	14.5164	0.00260844	0.0460277
Nr1h2	-0.862638	5.21601	14.4937	0.00262236	0.0461055
Mocs1	-0.721437	5.85451	14.4542	0.00264685	0.0464328
Rex1bd	-0.651789	4.48628	14.4434	0.00265358	0.0464356
Gatb	-0.518058	4.49816	14.4415	0.00265479	0.0464356
Miip	-1.2456	3.37379	14.4313	0.00266121	0.0464898
Cyp4v3	-0.415033	7.37497	14.4159	0.00267088	0.0465425
Masp1	-0.656123	7.14965	14.3964	0.0026832	0.046699
Setd3	-0.449051	6.76383	14.3862	0.00268967	0.0467397
Cyp3a13	-1.1858	6.65594	14.3694	0.00270037	0.0467653
Suv39h1	-1.27884	3.15872	14.3409	0.00271862	0.0469649
Klhl36	-0.997355	3.08776	14.3093	0.00273904	0.0472012
Josd1	-0.824879	6.01053	14.2868	0.00275365	0.0473468
Tmem106a	-0.558931	4.66754	14.199	0.00281168	0.0480355
Crebl2	-0.708388	7.91175	14.1942	0.00281491	0.0480355
Slc25a23	-1.11967	6.39869	14.1744	0.00282825	0.0482043
Amdhd1	-1.40862	4.15836	14.1555	0.00284099	0.0483496
Pah	-1.43081	5.52849	14.1466	0.00284701	0.0483496
Trp53inp1	-1.00888	9.89042	14.1464	0.00284714	0.0483496
Ggcx	-0.912297	4.10649	14.1254	0.00286146	0.0485338
Nt5c	-0.492155	4.86236	14.1196	0.00286545	0.0485426
Herc6	-0.821094	2.7324	14.1032	0.00287669	0.0486153
Trim14	-1.08618	3.29316	14.0902	0.00288563	0.048649
Aldh6a1	-0.753653	7.37661	14.0645	0.00290343	0.0488313
Map2k6	-1.83801	1.08136	14.0061	0.00294437	0.0494242
Mvk	-1.01162	4.29985	14.0005	0.00294832	0.0494242
Mb21d2	-0.484291	5.23966	13.9537	0.00298162	0.0497873
Srd5a2	-3.15378	1.32621	13.9348	0.00299522	0.0498953

## Sheet: DGE_WT_up
Differentially expressed genes in WT and HepKO hepatocytes challenged with high sugar compared to unchallenged cells.
Gene	logFC	logCPM	F	P-Value	FDR
Cpeb2	1.79072	8.37994	168.798	2.70915e-08	0.000119923
Acly	2.4791	9.54908	163.596	3.21596e-08	0.000119923
Gpd1	2.79718	9.81831	157.4	3.97178e-08	0.000119923
Kcng4	7.70367	3.15104	155.225	4.28511e-08	0.000119923
Zcchc14	1.80358	7.72182	149.543	5.25062e-08	0.000121882
Angptl8	3.38487	9.09558	145.488	6.09712e-08	0.000121882
Spsb2	2.18174	6.82594	117.05	1.96844e-07	0.000344305
Mcc	2.20195	4.26638	108.385	2.96497e-07	0.000360185
Irf2bp2	1.53476	7.5887	107.174	3.14711e-07	0.000360185
Glns-ps1	2.87925	6.51022	106.138	3.31328e-07	0.000360185
Mid1ip1	1.90536	8.20078	105.94	3.34625e-07	0.000360185
Glul	3.02174	7.93402	102.094	4.06884e-07	0.00040668
Aacs	1.88948	7.3442	96.9969	5.32835e-07	0.000458007
Ak2	1.4993	8.69064	96.4846	5.4786e-07	0.000458007
Gfod1	2.88794	5.97293	94.4248	6.13504e-07	0.000458007
Ddhd2	1.84102	7.17477	94.1803	6.21892e-07	0.000458007
Kcnb1	3.75981	1.08891	85.9389	1.0023e-06	0.000678818
Slc25a22	1.07653	7.34994	84.9571	1.06381e-06	0.000678818
Gprin3	1.63154	7.14942	84.9042	1.06725e-06	0.000678818
Txnl4a	1.84105	5.78791	81.1961	1.34421e-06	0.000808362
Hormad2	3.74225	2.41826	80.7099	1.38646e-06	0.000808362
Gpi1	2.34268	8.18772	78.855	1.56255e-06	0.00085431
Ncapd2	1.73426	3.32756	78.6134	1.58737e-06	0.00085431
Slc2a4	6.69593	4.54222	73.2287	2.28142e-06	0.00118237
Sorcs2	5.51256	3.05979	72.2086	2.45011e-06	0.00122444
Eif4e2	1.13665	7.39707	70.0905	2.84937e-06	0.00137487
Pikfyve	0.914536	5.77481	68.294	3.24877e-06	0.00143261
Dnmt3a	2.30807	7.44156	68.1804	3.27617e-06	0.00143261
Frmd8	1.92682	7.95833	63.7063	4.60588e-06	0.0018181
Scaf4	1.32653	7.03462	63.1167	4.8247e-06	0.00182465
Srpk2	1.04579	6.1757	61.7713	5.37134e-06	0.00191687
Lingo4	3.30577	1.62692	61.524	5.47951e-06	0.00191687
Itprid2	1.24465	7.52371	61.219	5.61653e-06	0.00191688
Txnip	5.67478	9.35793	59.0705	6.70384e-06	0.00213197
Gpd2	1.60699	7.12341	57.8967	7.40156e-06	0.00225152
Pdhb	2.60756	7.43984	57.243	7.82686e-06	0.00230733
Syngr1	3.76293	1.06808	56.9552	8.0232e-06	0.00230733
Lzts2	1.33689	6.47468	56.3004	8.49171e-06	0.00232464
Acaca	2.05648	6.56686	56.0546	8.6758e-06	0.00232464
Abcc9	2.72976	2.6872	55.8351	8.84417e-06	0.00232464
Lyn	0.967004	5.72405	55.689	8.95841e-06	0.00232464
Tkfc	1.89765	9.71695	55.3447	9.23441e-06	0.00233362
Kif21a	0.807402	7.17667	53.8551	1.05495e-05	0.0025898
Stard4	2.06274	7.83935	53.2958	1.1099e-05	0.00263055
Rpia	1.89721	5.07633	52.9039	1.15042e-05	0.00263055
Slc17a4	2.65079	7.3675	52.7938	1.16211e-05	0.00263055
Rab3gap2	0.892983	5.82204	51.5406	1.30552e-05	0.0028997
Mlxipl	2.11817	8.82569	51.2442	1.34241e-05	0.00293504
Gbe1	0.841992	8.40813	50.9373	1.38189e-05	0.00294215
Pdzrn3	3.96422	1.58492	50.893	1.38771e-05	0.00294215
Rnf39	1.54888	6.78915	50.6179	1.42444e-05	0.00297495
Crkl	0.84211	7.81904	50.3483	1.46156e-05	0.00298454
Mycbp2	1.09845	6.6719	50.2625	1.4736e-05	0.00298454
Tarbp1	0.933789	4.99724	50.126	1.49302e-05	0.00298454
Gapdh	1.8919	6.30937	49.2164	1.6303e-05	0.00318246
Mamdc4	1.40718	3.21111	49.1711	1.63751e-05	0.00318246
Arrdc4	2.94652	6.66426	48.2938	1.78488e-05	0.00342134
Cstf1	0.861984	6.79065	48.0925	1.82086e-05	0.00344315
Rsf1	1.03214	6.06333	47.3255	1.96595e-05	0.00366794
Nudt4	1.11671	10.1842	46.951	2.0417e-05	0.00375915
Lsm11	1.00235	5.02312	46.6025	2.11529e-05	0.00384405
Pgs1	0.70185	5.88717	46.2345	2.19638e-05	0.00389037
Zfp638	0.759888	7.10938	45.6544	2.33172e-05	0.00407847
Fbxo32	1.6947	3.35943	45.2958	2.42028e-05	0.00411822
Klf10	3.90323	7.51228	45.2073	2.44274e-05	0.00411822
Nedd4l	1.50078	6.80922	45.0834	2.47459e-05	0.00412226
Efcab14	1.50323	7.29783	43.9718	2.78326e-05	0.00441756
Kcnab3	3.98145	2.23195	43.9707	2.78359e-05	0.00441756
Rbbp6	0.888884	7.75209	43.783	2.84007e-05	0.00441756
Espn	2.79965	1.98201	43.2801	2.99814e-05	0.00453105
Plekha1	0.920836	7.01843	43.1091	3.05419e-05	0.00453105
Necap1	0.969739	6.64026	42.9295	3.11442e-05	0.00453105
Chd9	0.656254	7.04776	42.8603	3.13799e-05	0.00453105
Natd1	1.20264	5.39324	42.8517	3.14094e-05	0.00453105
Spen	1.09698	8.09308	42.2171	3.36745e-05	0.00475565
Uba2	0.951533	6.59632	42.1338	3.39859e-05	0.00475565
Slc25a36	4.31319	4.10432	41.9894	3.45336e-05	0.00478444
Dhx33	0.937285	7.64007	41.8722	3.49858e-05	0.00479958
Pgam2	2.2133	1.54688	40.6908	3.99534e-05	0.00520736
BC037034	0.730836	5.57692	40.6877	3.99674e-05	0.00520736
St6galnac4	2.48913	3.41534	40.6449	4.01624e-05	0.00520736
Ccdc127	0.739884	6.6967	40.5613	4.05465e-05	0.00520736
Cox19	0.888416	6.80995	40.5239	4.07201e-05	0.00520736
Tmem246	2.53678	3.39696	40.3863	4.13647e-05	0.00520736
Slc35f5	1.06596	6.76067	40.3596	4.14917e-05	0.00520736
Slc37a4	1.79943	8.13223	40.195	4.22815e-05	0.00523579
Slc35g1	1.11684	7.35524	39.8206	4.41458e-05	0.0054096
Ttc25	4.84179	1.85018	39.2897	4.69565e-05	0.00561816
Slc16a1	0.916321	8.2009	39.2863	4.69753e-05	0.00561816
Adipor2	0.806711	9.36148	39.1521	4.77189e-05	0.00562224
Cinp	0.766729	5.75518	38.9993	4.85824e-05	0.00562224
Slc2a2	2.44577	9.43557	38.7953	4.97643e-05	0.00562224
Dgkd	1.02381	6.55665	38.4163	5.20505e-05	0.00577292
Hcn3	2.82062	4.71144	38.3052	5.27442e-05	0.00577292
Sema3c	6.28115	1.53728	38.2784	5.29132e-05	0.00577292
Nrbf2	1.00088	5.07758	38.2299	5.322e-05	0.00577292
Bptf	1.00351	7.72655	38.1619	5.36545e-05	0.00577369
Zc3h8	1.63176	4.30412	38.1002	5.40522e-05	0.00577369
Zfp825	1.4279	4.17874	37.7679	5.62542e-05	0.00590139
Me1	1.26516	7.92351	37.026	6.15617e-05	0.00633406
Gprin2	1.96244	1.27529	36.91	6.24433e-05	0.00637787
Fgd6	0.718868	6.92045	36.461	6.6e-05	0.0065967
Rnf144b	1.21127	9.46728	35.9745	7.01241e-05	0.00695919
Tha1	2.22255	4.1325	35.8611	7.11288e-05	0.00696674
D7Bwg0826e	3.16519	0.231703	35.7127	7.24682e-05	0.00704199
Nup205	1.11512	5.48563	35.638	7.31537e-05	0.00705786
Sltm	0.787326	6.83537	35.5315	7.41446e-05	0.00705786
F7	1.30183	6.57273	35.4298	7.51051e-05	0.00710099
Prpf38b	0.719641	7.77781	34.8702	8.06615e-05	0.0073292
Dlat	0.810784	7.05766	34.4224	8.54563e-05	0.00766532
Itpr1	0.634686	6.48692	33.8664	9.18817e-05	0.00803563
Pklr	1.71761	8.56502	33.2343	9.98891e-05	0.00844087
Top1	0.781794	7.23641	33.2126	0.000100178	0.00844087
Tspan4	1.20086	6.52182	33.1996	0.000100351	0.00844087
Kyat3	0.931978	5.65868	33.1306	0.000101279	0.00844087
Vps13a	0.989878	5.59119	33.0553	0.000102303	0.00844087
Actr1b	0.664326	8.35116	32.9765	0.000103386	0.00844087
Gse1	1.50532	6.14768	32.9068	0.000104357	0.00844087
Adamts1	1.17989	7.27674	32.7586	0.000106456	0.00851221
Rapgef5	3.07063	3.3434	32.5159	0.000110002	0.00865549
Cyp2c53-ps	5.59756	0.731554	32.4833	0.000110488	0.00865549
Paqr9	1.10379	6.71165	32.4677	0.000110722	0.00865549
Nf1	0.806042	6.19319	32.3132	0.000113068	0.00874124
Nufip2	0.686168	7.53632	32.1538	0.000115552	0.00888007
Sh3bp5	0.645357	6.76837	32.0103	0.000117841	0.00888007
Hif1an	0.72365	6.67084	31.9592	0.00011867	0.00888007
Aldob	3.27449	13.8144	31.9366	0.000119038	0.00888007
Cpsf7	0.759102	6.99642	31.9202	0.000119306	0.00888007
BC005561	1.10487	5.87203	31.7559	0.000122033	0.00899113
Ubn2	0.669788	6.31977	31.7486	0.000122156	0.00899113
Fbxw4	0.800658	4.97671	31.7148	0.000122726	0.00899113
Eno1	1.09198	5.70525	31.4269	0.000127716	0.00925976
Irak1bp1	2.07526	2.72931	31.2716	0.000130508	0.00931731
Khk	1.61268	8.00591	30.6268	0.000142883	0.0100978
Pfkfb3	2.31747	6.17994	30.5532	0.000144382	0.0101525
Pdzd7	2.02817	2.12549	30.38	0.00014798	0.0102803
Atp12a	9.19304	0.342116	47.8859	0.000149138	0.0102803
Vmn2r-ps88	2.66487	-0.567139	30.2575	0.000150591	0.0103295
Pygl	0.897496	7.37003	30.1163	0.000153665	0.010489
Frmd4a	1.78098	3.46791	30.0525	0.000155079	0.0105023
Mapre3	0.785081	6.86976	29.9415	0.000157576	0.0105679
Ralgapa2	1.83369	6.80829	29.9297	0.000157843	0.0105679
Fgf21	4.775	7.18527	29.8323	0.000160077	0.0106664
Tnfrsf1b	0.853577	6.01405	29.7429	0.000162159	0.0107069
Ripor3	6.02331	1.99337	29.5977	0.000165609	0.0108797
Mast2	0.632918	7.02719	29.1857	0.00017588	0.0115004
Slc39a6	2.02042	7.54453	29.1049	0.000177979	0.0115835
Ccdc93	0.746889	6.16164	28.9377	0.000182422	0.0118177
Arsa	0.957403	7.45323	28.8077	0.000185965	0.0119533
Ldb1	0.916537	5.76002	28.7645	0.000187158	0.0119533
Prkca	0.848234	6.27312	28.7423	0.000187777	0.0119533
Arid3a	1.85826	4.03872	28.4325	0.00019665	0.012137
Slc5a3	0.915005	4.14913	28.4263	0.000196835	0.012137
Tfrc	1.03279	7.16419	28.4247	0.00019688	0.012137
Lpar2	0.986953	3.88536	28.4198	0.000197026	0.012137
Wdr26	0.840959	8.54728	28.395	0.000197759	0.012137
Galr2	2.05216	1.71495	28.3448	0.000199253	0.0121753
Bhlhe41	2.38214	4.081	28.251	0.00020208	0.0121873
Ash1l	0.809748	7.48145	28.2383	0.000202466	0.0121873
Pde4b	1.20939	3.96909	27.9509	0.000211444	0.0126442
Chd7	0.872342	6.59335	27.8259	0.000215494	0.0127551
Zfp622	0.818496	8.44933	27.8095	0.000216033	0.0127551
Rbm15	0.662924	6.32123	27.6074	0.000222796	0.0130443
G6pc	4.35101	8.20797	27.57	0.000224074	0.0130644
Plcxd1	2.44895	2.04884	27.2825	0.000234194	0.0134021
Rcan1	1.59344	9.07898	27.1939	0.000237419	0.0134804
Ybx2	5.17597	0.00510408	32.0255	0.000237951	0.0134804
Ifi30	1.01214	3.25202	27.1153	0.000240325	0.01356
Il15ra	0.752444	5.16345	26.9399	0.000246962	0.013823
Aen	0.661287	7.75243	26.7563	0.00025414	0.0140561
Yy1	0.619117	8.18488	26.539	0.000262955	0.0144295
Spata13	0.542855	7.04743	26.4601	0.000266243	0.0144401
Qsox1	0.676075	8.83315	26.2931	0.000273363	0.0145768
Mef2d	0.590747	7.53242	26.2552	0.000275014	0.0145768
Tnfrsf19	2.6117	2.07642	26.1493	0.000279678	0.014628
Tob2	0.822497	8.50238	26.0196	0.000285516	0.0147425
Vps37b	1.24392	5.19593	25.8663	0.000292607	0.014998
Tbc1d24	0.954357	7.46149	25.6481	0.000303055	0.0153936
Ctif	0.61311	5.44011	25.6364	0.000303627	0.0153936
Anapc7	0.540543	5.56423	25.5367	0.000308557	0.0155311
Nup54	0.916561	5.26513	25.4419	0.000313334	0.0155838
Casc1	2.31907	0.941298	25.2216	0.00032477	0.0158514
Adamtsl5	1.61407	4.23345	25.2151	0.000325116	0.0158514
Cep350	0.543249	7.00927	25.1371	0.000329285	0.0159344
Tent5c	2.44323	4.64597	25.0891	0.000331881	0.0159344
Tug1	0.623498	6.44724	25.039	0.000334619	0.0159344
Dcaf10	0.673888	6.0769	25.0223	0.000335541	0.0159344
Luc7l3	0.821351	6.44744	25.0212	0.000335602	0.0159344
Cabp2	2.52267	1.5902	25.0152	0.000335929	0.0159344
Ndst1	0.569089	8.27051	24.8919	0.000342815	0.0160974
Zfp354b	2.22903	2.16597	24.8563	0.00034483	0.0161067
Rchy1	1.25196	6.5304	24.6305	0.000357961	0.0164768
Fbxl16	1.97043	0.460106	24.589	0.000360435	0.0165363
Nabp1	0.842094	8.91168	24.5496	0.000362805	0.0165641
Zc3h7b	0.496838	7.31737	24.5335	0.000363779	0.0165641
Dcun1d4	0.855112	6.66253	24.4823	0.000366896	0.0166148
Ppie	1.03846	5.02272	24.4359	0.000369744	0.0166898
Pomgnt2	0.894914	4.54401	24.4041	0.000371715	0.0167248
Tent4b	0.535861	6.91874	24.253	0.000381237	0.0169893
Rangap1	0.571588	7.20404	24.1263	0.00038945	0.0173002
Vash2	3.98481	-0.592731	23.9956	0.000398133	0.01763
Zfp110	0.758428	7.63083	23.9258	0.000402867	0.0177274
Git1	0.834999	5.33444	23.7521	0.000414933	0.0181026
Fbxo34	1.04258	7.07901	23.7473	0.000415274	0.0181026
Uvrag	0.55885	6.30824	23.6221	0.000424237	0.0183658
Socs7	1.05628	6.33765	23.6082	0.000425251	0.0183658
Taf4	0.636172	5.25272	23.5585	0.000428883	0.0184091
Rbm25	0.606991	7.25791	23.4646	0.000435847	0.0186241
Nfat5	0.813704	6.90915	23.4551	0.000436555	0.0186241
Ythdc1	0.707923	6.66143	23.3519	0.000444377	0.0187357
Aoc3	2.54582	2.30529	23.3308	0.000445998	0.0187413
Slc25a44	1.22673	8.82714	23.297	0.000448607	0.0187945
Fhdc1	2.43327	2.90287	23.2515	0.000452149	0.0188863
Ubc	0.629187	8.14338	23.1311	0.000461672	0.0191747
Wdr70	0.798071	4.21646	23.1296	0.000461793	0.0191747
Sco1	0.649766	5.20821	22.9684	0.000474928	0.0194802
Ptpn23	0.609422	7.47958	22.9442	0.000476938	0.0194802
Jag1	1.97759	4.83683	22.9268	0.000478382	0.0194802
Zfp787	0.713635	5.77229	22.8632	0.000483729	0.0194802
Rad18	1.23714	4.40643	22.8045	0.000488727	0.0194802
Rnf19b	0.760232	6.17429	22.8	0.000489118	0.0194802
Sptbn4	5.57438	1.52674	22.7755	0.000491218	0.0194802
Gtf2ird2	0.840554	4.42937	22.7506	0.000493372	0.0194802
Hmg20b	0.685217	6.3305	22.7296	0.000495189	0.0194802
Dmxl2	0.563237	6.86799	22.7249	0.000495602	0.0194802
Dido1	0.579073	7.24253	22.706	0.000497247	0.0194901
Crebbp	0.568464	6.5221	22.6703	0.00050038	0.0195555
Fundc1	0.694922	4.58814	22.5639	0.000509852	0.0197159
Jag2	2.47048	-0.0693781	22.4793	0.000517537	0.0198662
Atf7	0.735596	6.97212	22.472	0.0005182	0.0198662
Ubxn7	0.475512	6.02878	22.4464	0.000520557	0.0199021
Tfdp1	0.624061	6.08365	22.4045	0.000524437	0.0199958
Trmt9b	2.23528	0.462799	22.3224	0.000532138	0.020142
Esrrb	2.97668	0.659981	22.3194	0.000532427	0.020142
Myo1b	0.635484	8.21346	22.3177	0.00053259	0.020142
Wnk4	1.10593	3.15718	22.2574	0.000538338	0.0202499
Aloxe3	3.13989	2.92505	22.17	0.000546793	0.0204151
Tmem132b	5.00888	-1.07689	22.1668	0.000547108	0.0204151
Ulk1	1.48246	7.24979	22.1219	0.000551523	0.0205252
Ndufb8	0.629328	4.31792	21.8792	0.000576099	0.0211408
Lcorl	0.603889	5.10528	21.8692	0.00057713	0.0211408
Pgd	0.636217	8.91549	21.8113	0.000583196	0.0213072
Slc39a10	1.79735	4.3665	21.7659	0.000588007	0.0213336
Hook3	0.611598	7.29071	21.7342	0.000591388	0.0213336
Ermap	6.67639	-1.85077	25.0442	0.00059154	0.0213336
Vkorc1l1	0.979746	7.67491	21.6735	0.000597937	0.0214741
Arl6ip5	0.689459	8.45798	21.6555	0.000599894	0.0214741
Chd5	2.30039	0.0367112	21.6401	0.000601575	0.0214741
Pcf11	0.826628	6.90192	21.6167	0.000604137	0.0215106
Rnf145	0.738573	5.2196	21.5871	0.000607398	0.0215719
Fzd6	1.16641	4.13006	21.3903	0.000629612	0.0222077
Ddx3x	0.865978	9.51897	21.3603	0.000633085	0.0222077
Camk4	3.94878	-0.352339	21.3165	0.000638192	0.0222699
Slc25a32	1.09333	6.94598	21.3028	0.000639799	0.0222704
Zfp292	0.556409	5.99633	21.2794	0.000642555	0.0223109
Grin3a	2.58442	-0.316418	21.1464	0.000658491	0.0228076
Snx18	0.717454	7.63666	21.0029	0.000676192	0.0233053
Kctd6	0.952196	4.97096	20.9273	0.000685749	0.0235766
Spag1	1.31615	1.03282	20.8952	0.000689862	0.0236599
Jmjd4	0.735889	5.68311	20.7172	0.000713157	0.0241533
Prex2	1.99964	1.02292	20.7164	0.000713258	0.0241533
Gan	0.728231	5.21129	20.6949	0.00071614	0.0241533
Cmtm8	0.743803	5.95506	20.6935	0.00071633	0.0241533
Fxr1	0.46293	6.57033	20.6693	0.000719586	0.0242047
Ankrd17	0.548607	7.67839	20.6336	0.000724411	0.0242504
Neto2	1.09508	3.16597	20.5969	0.000729421	0.0243212
Herc2	0.608029	6.47719	20.5927	0.000730002	0.0243212
Pom121	0.482565	6.29825	20.562	0.000734229	0.024404
Zfp341	1.223	3.13666	20.5127	0.000741065	0.0245728
H3f3b	0.77138	8.56983	20.478	0.000745927	0.024596
Map7	0.550611	5.73849	20.4384	0.000751529	0.0246731
Tom1l2	0.751136	6.83849	20.4239	0.000753595	0.0246731
Dip2b	0.741754	4.57711	20.3943	0.000757813	0.0246731
Nup153	0.689264	7.31051	20.3895	0.000758514	0.0246731
Oscp1	1.72872	0.420565	20.3884	0.000758664	0.0246731
Ptpmt1	0.605206	6.03597	20.3794	0.000759958	0.0246731
Shc3	6.14685	-1.61112	28.771	0.000776921	0.0251502
Znrf3	0.652841	5.13761	20.254	0.000778248	0.0251502
Pcgf6	0.609601	5.86994	20.2183	0.000783539	0.0252628
Chd2	0.591106	7.29233	20.1286	0.000797049	0.0255805
Ehbp1	0.731911	4.80177	20.06	0.000807552	0.0258286
Thumpd2	0.875354	2.73397	20.0209	0.000813625	0.0259341
Zfand2a	1.1878	7.62708	19.9822	0.000819686	0.0260452
Nat14	1.62481	2.44741	19.945	0.000825542	0.0261353
Fabp5	1.71214	1.32402	19.9109	0.000830977	0.0262099
Fasn	1.87251	9.94116	19.8727	0.000837097	0.0262634
Trio	0.855285	6.34634	19.8474	0.000841195	0.0263057
Tmem131	0.554119	5.96842	19.8296	0.000844084	0.0263057
Ubr4	0.8231	7.93455	19.7659	0.000854521	0.0264914
Fbxl20	0.864637	6.73811	19.7583	0.000855773	0.0264914
Khdc4	0.871794	6.86852	19.6832	0.000868297	0.0265866
Rnf20	0.617848	6.93199	19.5325	0.000894073	0.0271629
Ncbp1	0.683039	5.65035	19.5248	0.000895408	0.0271629
Lamp3	1.33587	1.21562	19.5167	0.000896824	0.0271629
Pqlc1	0.7343	7.36842	19.4172	0.0009144	0.0275166
Gata4	0.924738	5.51604	19.2986	0.000935893	0.0279484
Med13l	0.919112	6.22664	19.2831	0.000938747	0.0279487
Casz1	0.856419	3.21977	19.1416	0.000965242	0.0284194
Sfpq	0.796585	8.09969	19.1262	0.000968174	0.0284194
Ptpn1	0.496726	6.17888	19.0803	0.000976999	0.0285021
Stk17b	0.740369	3.8152	19.0735	0.000978317	0.0285021
Tnks	0.578423	7.21776	19.0512	0.00098264	0.0285021
Crybb3	2.05134	1.74408	19.023	0.000988132	0.028568
Dnajb6	0.705716	4.40891	18.9688	0.000998808	0.0287558
Rspo4	6.70566	-2.04743	26.5026	0.00100079	0.0287558
Stat5b	0.844759	6.8732	18.9366	0.00100521	0.0288085
Kdm5b	1.03329	6.63788	18.929	0.00100674	0.0288085
Zfp655	0.923359	7.62557	18.8435	0.00102402	0.0291989
Cnbp	0.761973	10.3512	18.8409	0.00102456	0.0291989
Rbm34	0.780839	5.61985	18.825	0.0010278	0.0292318
Ahcyl2	0.644636	5.90539	18.7847	0.00103611	0.0292318
Nrip3	2.58339	1.92771	18.7194	0.00104972	0.0292605
Zc3h15	0.871169	7.08223	18.6973	0.00105439	0.0292723
Pdrg1	0.808746	5.58509	18.6876	0.00105642	0.0292723
Clic3	2.06696	1.00658	18.6653	0.00106117	0.0293457
Tmem199	0.975171	5.17007	18.6261	0.00106954	0.0295188
Hsdl1	0.605022	6.30514	18.614	0.00107216	0.0295328
Cyp27b1	2.61278	0.87027	18.5484	0.00108639	0.0297396
Zbed5	1.04749	3.51122	18.5403	0.00108816	0.0297396
Ppfibp1	1.32092	8.55588	18.3253	0.00113651	0.0307572
Ip6k1	0.43016	7.40216	18.3163	0.00113859	0.0307572
Umps	0.778498	7.26396	18.294	0.00114375	0.0308372
Xpo7	0.648447	6.90751	18.2832	0.00114627	0.0308458
Zranb2	0.626635	7.2444	18.2578	0.0011522	0.0309457
Tmem158	1.76285	-0.0440529	18.2017	0.00116546	0.0311821
Prrc2c	0.653603	7.99736	18.1754	0.00117172	0.0312444
Nktr	0.59285	7.02774	18.1483	0.00117823	0.0312881
Hlx	2.43874	4.52604	18.127	0.00118336	0.0312881
Xpot	0.822476	8.34267	18.1206	0.00118491	0.0312881
Xkr6	0.704137	4.01788	18.1105	0.00118736	0.0312881
Elovl6	0.87783	8.41945	18.0846	0.00119367	0.0313379
Arhgap5	0.929069	8.7148	18.0601	0.00119966	0.031436
Kpna1	0.620365	7.40224	18.0196	0.00120968	0.0316009
Cbl	0.673977	6.00732	18.003	0.00121381	0.0316291
Tiparp	1.10952	5.64376	17.9454	0.00122826	0.0319216
Bhlha15	2.95317	2.55757	17.9365	0.00123051	0.0319216
Zfp958	0.592363	4.53598	17.9195	0.00123483	0.0319216
Aoc2	1.3403	4.26395	17.916	0.00123573	0.0319216
Zfp146	1.04118	7.37247	17.9132	0.00123644	0.0319216
Srrm4	1.32	6.23663	17.8693	0.00124767	0.0321414
Helz	0.530651	5.10247	17.862	0.00124955	0.0321414
Ppm1g	0.754406	7.93293	17.8521	0.00125209	0.0321478
Pptc7	0.8271	6.16303	17.8307	0.00125766	0.0322315
Rbmxl1	0.720597	3.89046	17.8036	0.00126471	0.032353
Rps12	0.86165	4.79532	17.7815	0.00127052	0.0323831
Fgf11	1.79071	1.03291	17.7071	0.00129026	0.0325503
Polr1d	0.50343	7.22378	17.6637	0.00130193	0.032718
Rorc	1.88366	7.00646	17.659	0.00130321	0.032718
Tecpr2	0.722151	5.64064	17.6535	0.0013047	0.032718
Ppil4	0.468865	5.95149	17.6371	0.00130916	0.0327712
Wdr43	1.21552	8.09519	17.5965	0.00132026	0.0328143
Rpl7l1	0.631597	7.16671	17.5849	0.00132348	0.0328359
Rreb1	0.532548	6.78985	17.5703	0.0013275	0.0328775
Mss51	1.46461	1.53427	17.5557	0.00133155	0.0329043
Rbm26	0.646367	5.70757	17.541	0.00133564	0.0329043
Adnp	1.07265	2.81401	17.4721	0.00135504	0.0331873
Trit1	0.849488	5.03024	17.3786	0.00138184	0.0335115
Bcl3	1.06597	6.5054	17.3618	0.00138674	0.0335721
Rassf1	1.13075	5.55524	17.2987	0.00140527	0.0336955
Fbxo28	0.789744	5.76865	17.2836	0.00140974	0.0336955
Ppm1f	0.615798	7.03933	17.2815	0.00141037	0.0336955
Pcsk9	0.656956	8.58957	17.2032	0.00143388	0.0341229
Tial1	0.440301	6.21086	17.1752	0.0014424	0.0342278
Pdcd7	0.777416	4.34053	17.1726	0.00144318	0.0342278
Sos2	0.452457	5.17158	17.0769	0.00147276	0.0348113
Pi4ka	0.478466	5.00132	17.0503	0.00148113	0.034915
Supt16	0.511108	5.74664	17.0413	0.00148396	0.034915
Gmeb1	0.665735	4.81926	17.0392	0.00148463	0.034915
Tsc22d2	0.961751	9.17877	17.0146	0.00149241	0.0349366
Mat2a	0.608377	8.07788	17.0058	0.00149521	0.0349366
Mill2	4.7356	0.0806779	16.9414	0.0015159	0.0350745
Ppp1r10	0.77707	6.33279	16.9294	0.00151976	0.0350925
Zfp617	0.704428	4.3608	16.9007	0.00152913	0.0352506
Lepr	2.48044	1.94054	16.8596	0.00154263	0.0353869
Flvcr1	0.958255	4.07455	16.8385	0.0015496	0.0354887
Surf2	0.655882	5.34085	16.8288	0.00155284	0.0355048
Nsun2	0.880204	7.63766	16.8194	0.00155598	0.0355184
Slc2a6	2.26673	-0.875609	16.8064	0.00156031	0.0355297
Lrrc58	0.575813	8.07043	16.8027	0.00156155	0.0355297
Fxr2	0.593034	6.66066	16.7924	0.00156501	0.0355506
Zswim5	0.771733	3.44796	16.7773	0.00157008	0.0356081
Map2k3	0.690077	7.12547	16.7012	0.001596	0.0360868
Pank3	0.441064	8.28684	16.7002	0.00159635	0.0360868
Xpo6	0.961865	7.10416	16.6873	0.00160081	0.0360893
Trpv1	3.34098	0.342283	16.67	0.00160678	0.0360893
Shroom1	1.08704	6.83678	16.6454	0.00161531	0.0361649
Kdelc2	0.812652	4.99922	16.6301	0.00162069	0.0362273
Bcar1	0.980943	8.15825	16.6106	0.00162752	0.0362875
Nmnat3	0.891528	4.49226	16.6076	0.00162857	0.0362875
Osgin1	1.22252	9.87864	16.5516	0.00164843	0.0365554
Nhlrc3	0.841944	6.71133	16.5091	0.00166369	0.0368354
Klhl22	0.662851	5.62489	16.4307	0.00169228	0.0372328
Gabpb1	0.787771	4.88696	16.4047	0.0017019	0.0373857
Atad2b	0.673711	6.40542	16.3631	0.0017174	0.0374908
Txlng	0.724316	5.47612	16.3063	0.00173883	0.0378512
Id2	1.40156	5.92989	16.2662	0.00175416	0.0380558
Slc25a47	2.5252	8.66434	16.2369	0.00176544	0.0381822
Zbtb1	0.579255	6.06645	16.2034	0.00177849	0.0383008
Ptbp1	0.729841	7.54151	16.1951	0.00178171	0.0383008
Shc2	1.58349	4.63518	16.1947	0.00178188	0.0383008
Ccnt1	0.639064	7.04011	16.1822	0.00178676	0.0383469
Irs2	1.37351	5.91264	16.1343	0.00180571	0.0384982
Fdx1	0.596687	7.8609	16.116	0.00181299	0.038555
Btbd9	0.736106	6.1922	16.1012	0.00181893	0.0386225
Hsf4	1.32858	2.78568	16.0757	0.00182919	0.0387305
Smad5	0.545285	6.84416	16.0675	0.0018325	0.0387305
Ubr2	0.520938	6.85081	16.0629	0.00183435	0.0387305
Cdc25a	0.593597	4.10792	16.0526	0.00183851	0.0387445
Paxx	1.09213	3.24728	16.0384	0.00184432	0.0388083
Ghrhr	6.11476	-2.14019	21.5853	0.00185026	0.0388166
Uso1	0.46984	6.98785	15.9805	0.00186806	0.0391041
Foxa3	0.663538	6.81286	15.9769	0.00186955	0.0391041
Bach1	0.7644	7.13807	15.9362	0.0018865	0.039224
Zfp407	0.730897	5.6866	15.8788	0.0019107	0.039572
Esf1	0.857886	6.59525	15.7952	0.0019466	0.0397647
Fes	2.12571	3.47217	15.7633	0.00196054	0.0399004
Pprc1	0.685254	7.25748	15.7344	0.00197321	0.0399071
Kpna6	0.375056	7.40974	15.707	0.00198537	0.0399818
Zbtb34	0.729135	4.3215	15.7015	0.00198782	0.0399818
Phc2	0.876342	7.59072	15.6928	0.00199167	0.0399848
Zbtb40	0.904087	6.11226	15.6818	0.00199659	0.0400263
Sgpp1	0.572483	7.54593	15.619	0.00202491	0.0402472
Ranbp9	0.554473	5.99355	15.6123	0.00202799	0.0402472
Anks1	0.499598	5.67759	15.6096	0.00202918	0.0402472
Fam207a	0.605412	5.67179	15.5998	0.00203369	0.0402472
Il20rb	1.00729	2.18034	15.597	0.00203494	0.0402472
Gna12	0.704674	7.5921	15.5886	0.00203878	0.0402472
Hyls1	0.984807	3.33377	15.5863	0.00203987	0.0402472
Ceacam16	2.25285	1.69015	15.5767	0.00204426	0.0402472
Slc12a5	1.1731	1.29822	15.5751	0.00204501	0.0402472
Tmem245	0.580957	6.87781	15.5524	0.00205546	0.0403075
Kcnd1	1.3846	0.526172	15.5497	0.00205671	0.0403075
Nob1	0.682547	5.70554	15.5433	0.00205968	0.0403092
Acsf2	1.14555	5.06507	15.5137	0.00207347	0.0404541
Rbm33	0.494606	6.67191	15.4955	0.00208204	0.0405201
Abca1	1.63206	7.77311	15.4814	0.00208866	0.0405386
Herc1	0.578454	6.5239	15.4811	0.00208878	0.0405386
Ppp2r2a	0.769361	6.51469	15.4724	0.0020929	0.0405623
Ep300	0.592771	6.77498	15.4616	0.002098	0.0405901
Tbc1d20	0.513498	7.33231	15.4571	0.00210014	0.0405901
Sprtn	0.507005	6.14868	15.4354	0.0021105	0.0406779
Foxk1	0.475332	7.01948	15.4021	0.00212648	0.0408173
Arhgap32	0.473957	5.45554	15.3758	0.00213918	0.0409706
Slc19a1	1.01588	6.55215	15.3674	0.00214325	0.0409706
Morc2a	0.608915	5.8566	15.3591	0.0021473	0.0409921
Hinfp	0.764466	5.22533	15.3388	0.00215722	0.0410249
Ubr1	0.484104	5.71431	15.3291	0.00216198	0.0410249
Celf1	0.507394	8.69326	15.3256	0.00216368	0.0410249
Ankrd52	0.417984	7.12715	15.2796	0.00218646	0.0414007
Upf2	0.617755	6.17723	15.2384	0.00220707	0.041553
Sos1	0.501992	6.81665	15.2321	0.00221024	0.041553
Pbx4	2.66397	1.1272	15.2256	0.00221353	0.041553
Lonrf1	0.471108	4.7387	15.2136	0.00221958	0.041553
Dcaf13	0.515508	4.69454	15.2084	0.00222221	0.041553
Rrm2	1.47208	4.7671	15.2079	0.00222248	0.041553
Ggn	2.13804	1.35046	15.2045	0.0022242	0.041553
Gtpbp4	0.604525	7.26428	15.1952	0.00222896	0.0415864
Smg6	0.432483	5.90381	15.1346	0.00226004	0.0419931
Hbp1	0.751697	5.04988	15.1281	0.00226344	0.0419931
Irf6	0.504789	6.90311	15.1192	0.00226805	0.0419931
Virma	0.409823	6.6609	15.1178	0.00226876	0.0419931
Srpk1	0.416009	7.0229	15.0945	0.00228094	0.0421464
Nop56	0.678798	7.30761	15.0648	0.00229649	0.0422271
Kin	0.527525	4.86161	15.0381	0.00231062	0.0424312
Zfp189	0.605372	5.45143	15.0144	0.00232327	0.0425517
Nup50	0.609632	8.16669	15.0033	0.00232924	0.0426052
Max	0.853961	6.59093	14.9503	0.00235785	0.0429602
Dapk1	0.529379	6.37186	14.9173	0.00237585	0.0432319
Fbxl22	1.53707	2.25584	14.9025	0.00238402	0.0433242
Cck	4.28115	0.328433	14.8826	0.00239502	0.0434113
Sugp2	0.67964	5.18654	14.8164	0.00243204	0.0438551
Jmjd6	0.460409	6.38236	14.7955	0.00244387	0.0440116
Pcdhac2	3.99114	-0.265945	16.4719	0.00245676	0.044187
Tacc2	0.608206	6.46063	14.7233	0.00248525	0.0445961
Mir1898	3.63351	-1.83749	14.7222	0.00248589	0.0445961
Galnt16	5.06705	-2.44133	16.3418	0.00251963	0.0450519
Gss	0.572633	7.70626	14.6618	0.00252113	0.0450519
Pgf	2.88396	4.32974	14.5873	0.00256542	0.0454559
Cdk12	0.831814	7.08385	14.5858	0.0025663	0.0454559
Ep400	0.448901	6.63966	14.4952	0.00262148	0.0461055
Rwdd2a	1.88961	1.37555	14.4931	0.00262274	0.0461055
Fnip2	0.555999	6.1641	14.4524	0.00264799	0.0464328
Tmem251	0.680276	5.41913	14.4254	0.00266488	0.0464958
Gtpbp1	0.454009	5.92011	14.3822	0.00269222	0.0467397
Csnk1g3	0.465964	6.73737	14.3712	0.00269922	0.0467653
Mier1	0.818365	7.12535	14.3413	0.00271833	0.0469649
Ttl	0.748991	5.8688	14.3321	0.00272424	0.0470041
Sik3	0.645694	7.11722	14.2859	0.00275425	0.0473468
Shpk	1.00502	5.60181	14.2653	0.00276773	0.0475201
Sh3bp2	1.13643	5.56244	14.2548	0.00277464	0.0475803
Tcerg1	0.736647	6.1897	14.2308	0.00279049	0.0477935
Fnta	0.485677	6.21985	14.223	0.00279569	0.0478242
Trp53bp2	0.603843	5.95977	14.1074	0.00287378	0.0486153
Mier2	0.456552	4.90212	14.0971	0.00288084	0.0486268
Lipg	2.02223	2.05108	14.0841	0.00288982	0.048661
Ski	0.437645	7.2706	13.9991	0.00294928	0.0494242
Gzmm	2.04278	1.21814	13.9842	0.00295983	0.0495418
Zfp651	1.17688	1.28913	13.9641	0.0029742	0.0497227
Zbtb25	0.751027	3.8855	13.9469	0.00298653	0.0498098
Prdm15	0.615272	4.69007	13.9208	0.00300534	0.0499564
Sra1	0.462582	7.11034	13.9199	0.00300602	0.0499564

## Sheet: DGE_hepKO_down
Differentially expressed genes in WT and HepKO hepatocytes challenged with high sugar compared to unchallenged cells.
Gene	logFC	logCPM	F	P-Value	FDR
Pck1	-4.61961	4.89	56.674	8.22058e-06	0.00221213
Gda	-1.74759	3.49455	51.2606	1.34033e-05	0.00307462
Ogfrl1	-1.18814	3.80396	47.908	1.85459e-05	0.00370732
Tns2	-0.97538	6.45615	45.7077	2.31888e-05	0.00413469
Pdlim1	-0.72146	4.99194	43.5077	2.92534e-05	0.0047598
Mtmr4	-0.904219	5.84745	41.9086	3.48446e-05	0.00513242
Nr2f2	-1.06135	4.61653	40.0946	4.27722e-05	0.0057147
Slc35d1	-1.17935	7.94122	40.0042	4.32196e-05	0.0057147
Cpt1a	-1.55659	6.53793	39.7437	4.454e-05	0.0057147
Gmcl1	-0.733949	4.67129	39.1424	4.77732e-05	0.00586395
Gcnt4	-1.77282	3.01303	38.5936	5.09663e-05	0.00614582
Pctp	-0.893765	5.49995	36.8757	6.2707e-05	0.00707109
Echdc3	-0.991527	5.36703	36.8079	6.32318e-05	0.00707109
Tmem106a	-0.900199	4.66754	36.3785	6.66783e-05	0.00723278
Upb1	-1.53114	5.00686	34.4533	8.5115e-05	0.00850724
Fam81a	-2.49652	1.06789	33.5624	9.56345e-05	0.00895581
Nectin3	-0.677242	6.46549	33.2842	9.92274e-05	0.0090315
Tmem106b	-0.771618	9.29669	32.5867	0.000108953	0.00947148
Ctso	-0.714643	5.7622	32.1029	0.000116357	0.00990193
Mbl2	-0.870513	8.06964	31.7212	0.000122618	0.0101526
Prkcz	-1.24528	3.55573	31.4781	0.000126812	0.0103771
Mb21d2	-0.725159	5.23966	31.2122	0.000131592	0.0105298
Zkscan17	-0.895927	5.43186	30.7612	0.000140193	0.0109594
Arid5b	-0.92428	6.70568	30.4795	0.0001459	0.0112795
Shisa5	-0.815902	4.39941	29.892	0.000158703	0.0118833
Cyp2r1	-0.900076	4.19596	29.8559	0.000159532	0.0118833
Cyp7b1	-1.09015	4.93833	29.4264	0.000169791	0.0122107
Masp1	-0.94213	7.14965	29.4115	0.000170162	0.0122107
Nacc2	-0.70696	5.86544	28.9902	0.000181013	0.0127282
Wipi1	-1.20439	3.54384	28.8298	0.000185355	0.0129038
Gpt	-1.14789	7.07336	28.7167	0.000188493	0.0130573
Cables2	-0.659103	5.43031	28.6526	0.000190298	0.0131174
Pcbp4	-0.856816	4.66175	28.5402	0.000193511	0.0131802
Slc22a18	-1.19462	5.47343	28.5028	0.000194595	0.0131802
Sesn3	-0.865278	7.13825	28.2741	0.000201379	0.013285
Adam11	-2.20863	4.02925	27.8012	0.000216306	0.0139483
Cpt2	-0.922848	6.62129	27.4958	0.000226635	0.0143292
Fbxo31	-0.742132	5.51641	27.4137	0.000229511	0.0143292
Stim1	-0.757937	5.7404	27.0907	0.000241242	0.014677
Prrc1	-0.636941	5.70665	27.0388	0.000243194	0.0147316
Idh2	-0.893084	5.04231	26.9722	0.000245725	0.0147572
Ppp1r21	-0.69251	4.41494	26.9254	0.000247519	0.0148015
Pros1	-0.710516	5.26876	26.538	0.000262996	0.0152702
Crebrf	-1.30015	4.7474	26.2922	0.000273406	0.0157439
Oma1	-0.66846	4.67212	26.2636	0.000274648	0.0157506
Ephb4	-1.40919	3.70038	25.8798	0.000291974	0.0166759
Fads6	-0.645275	8.14368	25.8068	0.000295415	0.0168038
Slc17a5	-0.63846	5.87697	25.7507	0.000298088	0.0168191
Endod1	-2.72592	5.60589	25.6333	0.000303779	0.0170714
Ppp1r16a	-0.796613	4.90845	25.5798	0.000306413	0.0170931
Itih5	-0.736133	5.18548	25.5513	0.000307829	0.0170931
Psd3	-1.01547	7.4834	25.5072	0.000310032	0.0171474
Tmem220	-0.903191	3.82631	25.3728	0.000316867	0.0173879
Uaca	-0.816921	4.6101	25.3311	0.000319025	0.017438
Homez	-0.937443	3.40075	25.1778	0.000327102	0.0178099
Gnptab	-0.679689	4.86536	24.9799	0.000337887	0.0181315
Lgals3bp	-0.991844	6.12399	24.9532	0.000339371	0.0181315
Fkbp5	-0.885886	8.25466	24.9511	0.000339489	0.0181315
Lclat1	-0.590379	6.19332	24.9139	0.000341571	0.0181734
Arhgef40	-1.2437	4.9117	24.4968	0.000366009	0.019254
Frat2	-1.77151	1.67582	24.428	0.000370233	0.0193105
Sri	-0.781888	5.64182	24.3416	0.000375617	0.0193948
Itpripl1	-0.851465	4.09441	24.215	0.000383679	0.0195964
Cxcl12	-2.22014	3.92535	24.2131	0.0003838	0.0195964
Fam20b	-0.758867	5.52564	24.1925	0.000385135	0.0195964
Btbd2	-0.72546	5.07483	24.1496	0.000387922	0.0195964
Smim19	-1.0347	3.94606	24.0075	0.000397334	0.019928
Igfbp4	-1.00835	9.91841	23.8269	0.000409686	0.020257
Dcxr	-1.48189	2.33981	23.6848	0.000419721	0.0205755
Sptlc2	-0.720771	6.16915	23.2432	0.000452794	0.021773
Lysmd4	-0.985717	4.2324	22.8399	0.00048571	0.0228072
Dram2	-0.513498	6.05815	22.7543	0.000493048	0.022921
Acox2	-1.11166	6.14056	22.6252	0.000504373	0.0232685
Mknk2	-0.859175	7.93492	22.6124	0.000505512	0.0232685
Asb7	-0.82992	4.50137	22.5194	0.000513876	0.0234749
Psmb9	-1.64132	1.77408	22.5037	0.000515302	0.0234749
Cnpy2	-0.724939	5.19984	22.4324	0.000521853	0.0234749
Akap7	-0.931336	2.95351	22.3791	0.000526809	0.0234749
Mn1	-1.43856	3.55219	22.3777	0.000526943	0.0234749
Carmil1	-0.731481	4.71554	22.3616	0.000528449	0.0234749
Hunk	-2.39677	2.02315	22.2646	0.000537647	0.0236909
Pskh1	-0.547638	6.58363	22.2568	0.000538392	0.0236909
Sgsh	-1.01201	3.72607	22.138	0.000549932	0.0241229
Ralgps2	-0.916614	3.60379	22.0662	0.000557045	0.024345
Mgam	-0.944724	4.30675	22.0519	0.000558475	0.024345
Abat	-1.7996	5.63916	21.8483	0.000579318	0.0250167
Ptk2b	-1.11709	5.33384	21.8252	0.000581734	0.0250167
Gsap	-1.08856	3.06927	21.7574	0.000588915	0.0250167
Cirbp	-0.839781	3.9275	21.727	0.000592163	0.0250167
Mfsd1	-0.718214	6.46461	21.7249	0.000592389	0.0250167
Ocln	-0.797538	5.50519	21.7081	0.000594199	0.0250167
Abcb1a	-2.1311	1.19602	21.5627	0.000610105	0.025444
Naga	-0.731587	4.24881	21.3871	0.000629984	0.0259193
Smo	-1.17602	3.51396	21.3227	0.000637459	0.0259301
Dnmbp	-0.703388	5.97745	21.1757	0.000654942	0.0262596
L2hgdh	-0.570759	5.7739	21.1487	0.000658204	0.0262942
Fhl4	-5.8561	-1.63593	24.0351	0.000685347	0.0269384
Tat	-2.20232	8.6466	20.8457	0.000696246	0.0271381
Atp11c	-0.783826	5.62234	20.814	0.00070037	0.0271396
Fahd1	-0.880996	5.62934	20.8041	0.000701669	0.0271396
Wrn	-0.680779	3.70019	20.8008	0.000702103	0.0271396
Adap2	-1.16422	3.49454	20.7437	0.000709632	0.0272799
Irx3	-1.96529	1.34699	20.7185	0.000712978	0.0273334
Gpr155	-0.882215	4.69793	20.5663	0.000733638	0.0280486
Mfhas1	-0.822365	5.96138	20.5002	0.000742821	0.0283223
Etnk2	-1.135	5.30758	20.4673	0.000747442	0.0284211
Vav2	-0.502604	5.82743	20.3996	0.000757058	0.0286552
Dhx40	-0.510255	5.64956	20.3525	0.000763839	0.0286552
Tm7sf3	-0.750689	6.81146	20.3056	0.00077066	0.0288078
AU040320	-0.531753	6.07554	20.0151	0.000814524	0.0298595
Nipsnap1	-0.811088	6.3908	20.0112	0.000815144	0.0298595
Gk	-1.33197	5.82776	19.9972	0.000817324	0.0298611
Tyk2	-0.631365	5.10802	19.9581	0.000823472	0.0300074
Pdia4	-0.680738	6.58937	19.9039	0.000832096	0.0300737
Cbr4	-0.676013	4.91087	19.8927	0.000833888	0.0300737
Lrrcc1	-1.21069	2.36379	19.8762	0.00083653	0.0300914
AA986860	-2.22422	4.45981	19.7833	0.000851647	0.0303565
Nudt2	-0.643932	4.19099	19.7776	0.000852578	0.0303565
Panx1	-1.96567	1.42446	19.5885	0.000884393	0.0311721
Fam72a	-1.11811	1.77395	19.5744	0.000886821	0.0311791
St5	-0.886683	5.23262	19.5234	0.000895649	0.0312451
Slc7a2	-1.23794	8.01646	19.5212	0.000896039	0.0312451
Twsg1	-0.494943	6.88574	19.5	0.000899755	0.0312451
Slc35d2	-0.756998	4.99257	19.4866	0.000902094	0.0312451
Spg20	-0.661772	6.51261	19.4691	0.00090519	0.0312749
Scly	-0.670873	5.43384	19.4035	0.000916849	0.0315477
Anpep	-1.02641	5.15951	19.3456	0.000927303	0.0318033
Ggt6	-1.39371	4.58895	19.1993	0.00095434	0.0323343
Fzd5	-1.05064	5.46152	18.9601	0.00100054	0.0332556
Nfyb	-0.574135	4.92269	18.9116	0.00101023	0.0334622
Esrp2	-0.945883	6.18446	18.8684	0.00101896	0.033628
Pias3	-1.01653	3.25011	18.8355	0.00102566	0.0337187
Dnase1l1	-0.594694	3.73288	18.7964	0.00103369	0.0337187
Ank3	-1.15898	4.38581	18.7961	0.00103376	0.0337187
Clcn2	-1.06448	3.36213	18.7743	0.00103825	0.0337187
Clmn	-0.814907	7.17065	18.7432	0.00104474	0.0337187
Ptges2	-0.461975	4.96517	18.7223	0.00104911	0.0337187
Dnajb5	-0.771108	3.84376	18.7049	0.00105276	0.0337187
Tmem25	-2.65369	2.51255	18.6975	0.00105434	0.0337187
Amer1	-0.687664	3.60781	18.6824	0.00105753	0.0337187
Mmd	-1.11931	5.44367	18.6778	0.00105849	0.0337187
Arpin	-1.34235	4.25861	18.6695	0.00106026	0.0337187
Cyp7a1	-7.26688	1.65151	21.1516	0.00107205	0.0339531
Nt5dc1	-0.611951	4.49821	18.4992	0.00109722	0.0345797
Pdp1	-0.896441	3.33155	18.4655	0.0011047	0.0347374
Unc50	-0.530164	5.0097	18.4135	0.00111637	0.034869
Gjb2	-1.82296	7.79826	18.3676	0.00112679	0.0350383
Bbc3	-0.959799	5.14253	18.329	0.00113566	0.0352358
Tmem8	-0.4972	5.65564	18.3061	0.00114095	0.0353215
Rnf141	-0.482336	7.15332	18.271	0.00114912	0.0354959
Ctbs	-0.778491	3.9032	18.2071	0.00116417	0.0357331
Rab7	-0.640055	9.15911	18.186	0.00116918	0.0357963
Tmem203	-0.787535	3.20499	18.1718	0.00117258	0.0357963
Smarca2	-1.03738	5.81328	18.165	0.00117419	0.0357963
Scaper	-0.931408	2.8999	18.1394	0.00118037	0.0359064
Tmem250-ps	-0.444864	6.95209	17.8897	0.00124242	0.0372214
Zfp467	-2.30182	3.60767	17.8547	0.00125144	0.0373376
Arhgef16	-1.57114	2.67649	17.7626	0.00127549	0.0377615
Rp2	-0.458489	5.35419	17.7259	0.00128522	0.0377757
Casp7	-1.21006	4.37859	17.6377	0.001309	0.0379884
Prkcz2	-0.773611	5.1022	17.4318	0.00136651	0.0388019
Garem1	-0.73928	6.09621	17.3768	0.00138237	0.0389204
Bche	-1.01625	6.86452	17.3166	0.00139998	0.0392582
Dcaf11	-0.81083	6.86026	17.2794	0.001411	0.0394096
Tvp23b	-0.59256	5.05747	17.2582	0.00141731	0.0395046
Adhfe1	-0.837933	4.72904	17.2491	0.00142005	0.0395046
Xdh	-0.916615	5.60343	17.0447	0.00148287	0.0407659
Zfyve21	-0.934646	4.63756	16.9245	0.00152136	0.0416603
Gcc2	-0.491294	6.85466	16.839	0.00154946	0.042168
AW011738	-1.37805	0.867839	16.794	0.00156447	0.0421804
Fech	-0.531586	6.87319	16.7389	0.00158312	0.0423569
Mtmr14	-0.639495	4.56144	16.639	0.00161756	0.0428701
Cyp3a13	-1.28077	6.65594	16.633	0.00161966	0.0428701
Hapln1	-4.56597	2.16213	16.6239	0.00162286	0.0428701
Prps2	-0.872349	5.10613	16.6134	0.00162655	0.0428701
Serinc5	-0.59041	6.97377	16.5897	0.00163489	0.0429213
Lpgat1	-0.483746	8.67386	16.5722	0.0016411	0.0430037
Rab29	-0.953485	3.5371	16.5051	0.00166512	0.0433805
Adtrp	-0.7045	4.6826	16.4889	0.00167098	0.0433805
Myo5b	-0.629882	5.51944	16.4568	0.00168268	0.0435054
Bivm	-0.533785	5.14559	16.4394	0.00168906	0.0435268
Ppp4r4	-1.17728	3.90806	16.4043	0.00170204	0.0435405
Ttc36	-1.86744	3.38217	16.333	0.00172873	0.0438226
Slc35e1	-0.481876	7.20817	16.3083	0.00173809	0.0439776
Acap2	-0.513056	5.97919	16.2548	0.00175856	0.0442581
Cln6	-1.28018	2.46371	16.2318	0.00176742	0.0442662
Ptpn6	-1.16271	1.77879	16.226	0.00176969	0.0442662
Gipc2	-2.49094	1.64654	16.1382	0.00180416	0.044921
Sap30l	-0.512983	4.75188	16.0351	0.00184564	0.0455733
Ccdc151	-3.8802	-1.30057	15.9961	0.00186163	0.0457411
Eci2	-0.603494	4.62608	15.9811	0.00186783	0.0457411
Poli	-0.887583	2.82778	15.975	0.00187036	0.0457411
Mapk3	-0.734212	4.43555	15.9685	0.00187306	0.0457411
Slc16a7	-1.07879	6.06627	15.9283	0.00188982	0.0460701
Limd2	-1.28564	3.1587	15.9064	0.00189901	0.0462137
Fgfr4	-1.6314	3.85004	15.824	0.00193416	0.0469058
Ivd	-0.851695	6.07816	15.7612	0.00196142	0.047321
Fignl2	-0.737944	3.92843	15.7172	0.00198083	0.0473844
Ssbp2	-2.3922	-0.527273	15.7169	0.00198098	0.0473844
Hpn	-0.823591	7.14531	15.6825	0.00199629	0.04756
Tmem205	-0.690119	6.46799	15.6775	0.00199852	0.04756
B3galt1	-3.74307	0.595408	15.646	0.00201268	0.0478157
Pbx1	-1.17261	3.30199	15.6182	0.00202528	0.0480334
Fam174a	-0.625438	4.55705	15.4795	0.00208956	0.0488348
Rab7-ps1	-0.575372	9.00163	15.3857	0.00213439	0.0494266
Fbxl21	-1.7874	0.190247	15.3808	0.00213674	0.0494266
Lmbr1	-1.03401	3.66783	15.373	0.00214053	0.0494266
Gstp1	-1.13283	4.05541	15.3491	0.00215218	0.0495321

## Sheet: DGE_hepKO_up
Differentially expressed genes in WT and HepKO hepatocytes challenged with high sugar compared to unchallenged cells.
Gene	logFC	logCPM	F	P-Value	FDR
Acly	2.72714	9.54908	194.12	1.2549e-08	0.000175598
Angptl8	3.45579	9.09558	150.625	5.04845e-08	0.000206083
Kcng4	7.87543	3.15104	148.471	5.46019e-08	0.000206083
Ak2	1.86567	8.69064	146.195	5.9386e-08	0.000206083
Ddhd2	2.24116	7.17477	135.709	8.88938e-08	0.000206083
Cpeb2	1.57958	8.37994	133.021	9.90352e-08	0.000206083
Slc25a22	1.34969	7.34994	132.035	1.03093e-07	0.000206083
Gfod1	3.39429	5.97293	123.394	1.48386e-07	0.000259545
Gpi1	2.91774	8.18772	116.858	1.9858e-07	0.000300035
Zcchc14	1.56725	7.72182	114.527	2.2113e-07	0.000300035
Acaca	3.01861	6.56686	111.954	2.49594e-07	0.000300035
Ncapd2	2.0913	3.32756	111.316	2.57301e-07	0.000300035
Gprin3	1.80756	7.14942	103.23	3.83794e-07	0.000384606
Glns-ps1	2.80494	6.51022	101.986	4.09159e-07	0.000384606
Mid1ip1	1.86672	8.20078	101.839	4.12284e-07	0.000384606
Kcnb1	4.26559	1.08891	98.9712	4.79274e-07	0.000419155
Gpd1	2.11244	9.81831	94.664	6.05424e-07	0.000498335
Chd9	0.957161	7.04776	90.4258	7.69216e-07	0.00059798
Glul	2.79718	7.93402	89.3957	8.16546e-07	0.000601364
Frmd8	2.27369	7.95833	86.6777	9.58758e-07	0.000603761
Gapdh	2.56639	6.30937	86.1001	9.92608e-07	0.000603761
Spsb2	1.84517	6.82594	85.7806	1.01194e-06	0.000603761
Rpia	2.4734	5.07633	85.7066	1.01647e-06	0.000603761
Srpk2	1.22726	6.1757	84.3392	1.10479e-06	0.000603761
Adipor2	1.19001	9.36148	83.9838	1.1292e-06	0.000603761
Elovl6	1.93816	8.41945	83.4995	1.16348e-06	0.000603761
Aacs	1.74482	7.3442	83.4787	1.16498e-06	0.000603761
Sorcs2	6.6095	3.05979	82.0664	1.2723e-06	0.000635833
Pygl	1.48362	7.37003	80.3474	1.41896e-06	0.000684673
Hormad2	3.74337	2.41826	79.5698	1.49176e-06	0.000695805
Slc2a4	5.5349	4.54222	78.3391	1.61611e-06	0.000729489
Rsf1	1.31568	6.06333	76.1392	1.87001e-06	0.000817719
Cinp	1.05665	5.75518	73.1473	2.29437e-06	0.000972881
Tkfc	2.18268	9.71695	71.8241	2.51745e-06	0.00103608
Pklr	2.58531	8.56502	70.7679	2.7139e-06	0.00107443
Me1	1.77139	7.92351	70.5119	2.76419e-06	0.00107443
Abcc9	3.08582	2.6872	69.4117	2.9931e-06	0.00113196
Kif21a	0.912527	7.17667	68.5696	3.18343e-06	0.00117226
Paqr9	1.61222	6.71165	67.7855	3.37349e-06	0.00121039
Hcn3	3.91311	4.71144	66.9895	3.58021e-06	0.00125245
Gpd2	1.72279	7.12341	65.8832	3.89266e-06	0.00132854
Dnmt3a	2.24105	7.44156	64.5416	4.31547e-06	0.00143777
F7	1.76261	6.57273	63.9177	4.53027e-06	0.00147423
Vps13a	1.35065	5.59119	60.7621	5.82931e-06	0.00185385
Slc16a1	1.14172	8.2009	60.4539	5.97815e-06	0.00185745
Efcab14	1.77402	7.29783	60.1962	6.10611e-06	0.00185745
Nrbf2	1.25627	5.07758	59.5901	6.41977e-06	0.00191132
Eif4e2	1.03955	7.39707	58.8097	6.85193e-06	0.00199748
Cabp2	3.96013	1.5902	58.4827	7.04312e-06	0.00201131
St6galnac4	3.09566	3.41534	57.2464	7.82458e-06	0.00215664
Tent5c	3.76341	4.64597	57.1935	7.86026e-06	0.00215664
Espn	3.18776	1.98201	55.6584	8.98252e-06	0.00237156
Zfp825	1.72985	4.17874	54.8636	9.63695e-06	0.00249722
Eno1	1.45449	5.70525	54.3673	1.00739e-05	0.00256299
Txnip	5.3526	9.35793	53.9306	1.04778e-05	0.00261813
Lyn	0.945733	5.72405	53.4561	1.09382e-05	0.00268522
Slc35g1	1.28235	7.35524	52.2101	1.22648e-05	0.00295898
Txnl4a	1.44972	5.78791	51.3285	1.33179e-05	0.00307462
Irak1bp1	2.75023	2.72931	51.314	1.33361e-05	0.00307462
Khk	2.11078	8.00591	50.9269	1.38325e-05	0.00312191
Fabp5	2.89399	1.32402	50.5382	1.43531e-05	0.00318797
Shroom1	1.93662	6.83678	50.2672	1.47294e-05	0.00322045
Ccdc127	0.819566	6.6967	49.6452	1.56382e-05	0.00336654
Dhx33	1.02117	7.64007	49.4623	1.59178e-05	0.00337481
Irf2bp2	1.02772	7.5887	49.2489	1.62513e-05	0.0033941
Kcnab3	4.27289	2.23195	48.8375	1.6918e-05	0.00348137
Pdhb	2.37518	7.43984	48.2885	1.78581e-05	0.00362158
Arrdc4	2.93571	6.66426	47.4914	1.93345e-05	0.00381054
Itprid2	1.09046	7.52371	47.3199	1.96706e-05	0.00382276
Lipg	3.78151	2.05108	47.1834	1.9943e-05	0.00382276
Necap1	1.00948	6.64026	46.389	2.16189e-05	0.004045
Syngr1	3.0803	1.06808	46.3612	2.16805e-05	0.004045
Rnf144b	1.37668	9.46728	46.0938	2.22833e-05	0.00410276
Frmd4a	2.22509	3.46791	45.8023	2.29631e-05	0.00413469
Fam207a	1.04043	5.67179	45.6437	2.33431e-05	0.00413469
Plekha1	0.938538	7.01843	44.7723	2.55676e-05	0.00447209
Xpot	1.30288	8.34267	44.5594	2.61482e-05	0.00451719
Bri3	0.869537	4.77442	44.4394	2.64822e-05	0.00451909
Nup205	1.25126	5.48563	44.3147	2.68347e-05	0.00452408
Fbxo34	1.42538	7.07901	43.6816	2.87114e-05	0.0047598
Rrm2	2.59207	4.7671	43.5437	2.91402e-05	0.0047598
Zc3h7b	0.660217	7.31737	43.17	3.03411e-05	0.00480432
Mcc	1.34708	4.26638	42.9632	3.10301e-05	0.00480432
Slc17a4	2.3609	7.3675	42.9051	3.12272e-05	0.00480432
Ifi30	1.27675	3.25202	42.8701	3.13466e-05	0.00480432
Uvrag	0.75452	6.30824	42.8258	3.14985e-05	0.00480432
Pgd	0.894634	8.91549	42.8001	3.1587e-05	0.00480432
Lzts2	1.15534	6.47468	42.4337	3.28807e-05	0.00494731
Mlxipl	1.90863	8.82569	42.2362	3.36038e-05	0.00500232
Fbxw4	0.92424	4.97671	41.6321	3.59337e-05	0.00523569
Ldb1	1.10329	5.76002	41.5428	3.6294e-05	0.00523569
Nhlrc3	1.34151	6.71133	41.043	3.83907e-05	0.00542343
Dlat	0.886238	7.05766	41.0247	3.84701e-05	0.00542343
Ulk1	2.04835	7.24979	40.9587	3.87582e-05	0.00542343
Fasn	2.76584	9.94116	40.6039	4.03503e-05	0.00556591
Spen	1.07494	8.09308	40.5541	4.05802e-05	0.00556591
G6pc	5.56624	8.20797	40.4703	4.09697e-05	0.00556591
Tob2	1.02237	8.50238	39.9434	4.35236e-05	0.0057147
Natd1	1.1597	5.39324	39.7101	4.47138e-05	0.0057147
Tiparp	1.67821	5.64376	39.6983	4.47754e-05	0.0057147
Lingo4	2.55287	1.62692	39.6698	4.49236e-05	0.0057147
Crkl	0.745621	7.81904	39.5835	4.53756e-05	0.00572019
Rcan1	1.93463	9.07898	39.2521	4.71635e-05	0.00586395
Mllt1	1.30128	6.70966	39.1786	4.75708e-05	0.00586395
Tarbp1	0.819962	4.99724	38.6846	5.04196e-05	0.00613497
Slc25a36	4.37296	4.10432	38.5242	5.13872e-05	0.00614582
Pigx	0.91897	4.72325	37.901	5.53596e-05	0.0065648
Ccdc137	1.20653	6.26397	37.7808	5.61668e-05	0.00660455
Uba2	0.898515	6.59632	37.5535	5.77308e-05	0.00673189
Sh3bp5	0.698501	6.76837	37.4238	5.86465e-05	0.00678215
Rnf39	1.31954	6.78915	37.1233	6.08335e-05	0.0069774
Ttc25	4.29454	1.85018	37.0322	6.15145e-05	0.00699815
Hmg20b	0.872725	6.3305	36.7516	6.36716e-05	0.00707109
Mycbp2	0.934502	6.6719	36.51	6.56005e-05	0.00722794
Ybx2	8.34055	0.00510408	44.348	6.62708e-05	0.00723278
Esrrb	4.10231	0.659981	36.0744	6.92527e-05	0.00745425
Mamdc4	1.20249	3.21111	35.9236	7.05728e-05	0.00753837
Pgs1	0.61625	5.88717	35.6103	7.34104e-05	0.00778206
Gtf2ird2	1.05202	4.42937	35.3965	7.54237e-05	0.00785453
Pikfyve	0.655341	5.77481	35.3622	7.57524e-05	0.00785453
Ppil4	0.665687	5.95149	35.3595	7.5778e-05	0.00785453
Gse1	1.56088	6.14768	35.2528	7.68126e-05	0.00790322
Pdk1	1.40017	6.70704	35.1743	7.75846e-05	0.00792439
Tent5a	1.53453	5.88112	35.0257	7.90705e-05	0.00801763
Gata4	1.24669	5.51604	34.8409	8.09654e-05	0.00815071
Tecpr2	1.01231	5.64064	34.2948	8.68824e-05	0.00856172
Scaf4	0.971542	7.03462	34.2947	8.68837e-05	0.00856172
Cmtm8	0.95866	5.95506	34.2328	8.75865e-05	0.00857062
Crebbp	0.69464	6.5221	33.7377	9.34498e-05	0.00895581
Plcxd1	2.71622	2.04884	33.6577	9.444e-05	0.00895581
Fbxo32	1.44719	3.35943	33.5381	9.59431e-05	0.00895581
Zc3h8	1.54273	4.30412	33.5286	9.60632e-05	0.00895581
Mttp	1.46543	8.39274	33.5252	9.6106e-05	0.00895581
Tmem246	2.35575	3.39696	33.507	9.63381e-05	0.00895581
Ppfibp1	1.81179	8.55588	33.4831	9.66431e-05	0.00895581
BC005561	1.13346	5.87203	33.4134	9.75394e-05	0.0089794
Ndufb8	0.779115	4.31792	33.2714	9.93962e-05	0.0090315
Sertad1	1.19799	5.32949	33.1722	0.000100719	0.00909261
Usp18	1.63402	4.15851	32.9938	0.000103148	0.00920996
Bcar1	1.39538	8.15825	32.9803	0.000103335	0.00920996
Slc25a44	1.46174	8.82714	32.712	0.000107127	0.00944331
Slc37a4	1.61236	8.13223	32.6998	0.000107303	0.00944331
Pdzrn3	2.78294	1.58492	32.5851	0.000108976	0.00947148
Morn1	1.47515	1.91377	32.52	0.00010994	0.00949597
Cstf1	0.707283	6.79065	32.4748	0.000110616	0.00949597
Sos1	0.729476	6.81665	32.0576	0.000117081	0.00990193
Mast2	0.663596	7.02719	32.0313	0.000117503	0.00990193
Dapk1	0.777217	6.37186	31.9897	0.000118175	0.00990193
Top1	0.766609	7.23641	31.9218	0.000119281	0.00993512
Ppie	1.19581	5.02272	31.6247	0.000124264	0.0102284
Ngdn	1.31304	4.92169	31.402	0.000128158	0.0104263
Ubl4a	0.867417	6.94207	31.3055	0.000129892	0.0105063
Rnf20	0.783433	6.93199	31.207	0.000131689	0.0105298
Jag2	3.18467	-0.0693781	30.974	0.000136056	0.010793
Nedd4l	1.23389	6.80922	30.9496	0.000136522	0.010793
Slc2a2	2.15835	9.43557	30.8733	0.000137996	0.0108482
Slc30a10	4.45219	5.4211	30.6416	0.000142584	0.0110843
Slc39a6	2.0758	7.54453	30.3965	0.000147634	0.0113508
Ttl	1.09668	5.8688	30.3033	0.000149609	0.0114398
Cyp2c53-ps	4.20381	0.731554	30.0091	0.00015605	0.0118674
Il15ra	0.792541	5.16345	29.9597	0.000157161	0.0118833
Irs2	1.88315	5.91264	29.8287	0.000160158	0.0118833
Htra3	3.81998	1.08227	29.8138	0.000160505	0.0118833
Aoc2	1.78337	4.26395	29.7711	0.000161499	0.0118939
Iws1	0.900572	6.23703	29.5376	0.000167062	0.0121995
Vkorc1l1	1.14707	7.67491	29.5163	0.000167582	0.0121995
Bcl3	1.39915	6.5054	29.4885	0.000168262	0.0121995
Myo1b	0.728556	8.21346	29.281	0.000173438	0.0123823
Pfkfb3	2.25965	6.17994	29.1519	0.000176753	0.0125548
Gdap2	0.840413	6.13939	29.0027	0.000180679	0.0127282
Spata13	0.567458	7.04743	28.9219	0.000182848	0.012793
Lepr	3.34296	1.94054	28.4288	0.000196761	0.0131802
Pitpnc1	1.15272	5.90272	28.4193	0.00019704	0.0131802
Zadh2	0.860008	7.79896	28.3999	0.000197612	0.0131802
Tspan4	1.11048	6.52182	28.3862	0.000198018	0.0131802
Cyp27b1	4.03964	0.87027	28.3821	0.00019814	0.0131802
Ralgapa2	1.78372	6.80829	28.3618	0.000198743	0.0131802
Mis12	0.910444	6.16097	28.2463	0.000202223	0.013285
Fam187b	0.863317	4.07987	28.126	0.000205919	0.0134646
Sprtn	0.685911	6.14868	28.0858	0.000207173	0.0134836
Ppard	1.42149	5.3968	27.9841	0.000210382	0.013629
Bhlha15	3.76139	2.55757	27.7502	0.00021799	0.0139924
Actr1b	0.608093	8.35116	27.6663	0.000220797	0.0141078
Stat5b	1.01869	6.8732	27.4355	0.000228742	0.0143292
Nabp1	0.890861	8.91168	27.4146	0.000229477	0.0143292
Aldob	2.99542	13.8144	27.3884	0.000230406	0.0143292
Nudt4	0.848693	10.1842	27.3883	0.000230406	0.0143292
Rbbp6	0.700286	7.75209	27.3138	0.000233067	0.0144263
Zfp638	0.586427	7.10938	27.287	0.000234029	0.0144263
Stard4	1.44285	7.83935	27.1408	0.000239378	0.0146528
Ube2j1	0.602904	7.21052	27.1295	0.000239799	0.0146528
Anks1	0.658145	5.67759	26.9966	0.000244795	0.0147572
Gprin2	1.66961	1.27529	26.8709	0.000249632	0.0148643
Rassf1	1.42184	5.55524	26.7662	0.000253748	0.0150453
Gorasp1	0.711731	5.75339	26.6841	0.00025703	0.015119
Pxn	0.758057	7.18474	26.6644	0.000257825	0.015119
Ak4	1.22395	7.40932	26.6543	0.000258233	0.015119
Tfdp1	0.681912	6.08365	26.6121	0.00025995	0.0151562
Derl2	0.930699	7.06261	26.4546	0.000266474	0.0154081
Ormdl3	1.08467	8.36524	25.7672	0.000297299	0.0168191
Ppp1r3c	1.82335	5.31357	25.5719	0.000306808	0.0170931
Rab3gap2	0.625895	5.82204	25.422	0.000314344	0.0173174
Atp2b2	4.52565	1.89179	25.1148	0.000330491	0.0179246
Kcnd1	1.81367	0.526172	25.0085	0.000336298	0.0181315
Fgf21	4.34721	7.18527	24.8027	0.000347895	0.0184398
Gss	0.742528	7.70626	24.5502	0.000362766	0.0191554
Nup50	0.779976	8.16669	24.4379	0.000369624	0.0193105
Upf2	0.783791	6.17723	24.412	0.000371223	0.0193105
Zfp758	0.812645	4.60642	24.3466	0.000375307	0.0193948
Fgd6	0.585781	6.92045	24.288	0.00037901	0.0194981
Ttc17	0.675549	6.04135	24.1544	0.000387608	0.0195964
Arl6ip5	0.727573	8.45798	24.0774	0.00039267	0.0197649
Aloxe3	3.63215	2.92505	23.9665	0.0004001	0.019995
Ccdc134	0.926943	3.84786	23.9067	0.00040417	0.0200869
Reck	1.90524	0.817215	23.8974	0.00040481	0.0200869
Bptf	0.78976	7.72655	23.7908	0.000412206	0.0203099
Csl	0.752851	6.47338	23.6734	0.000420538	0.0205755
Nob1	0.844194	5.70554	23.4731	0.000435209	0.0212191
H3f3b	0.826232	8.56983	23.4486	0.000437044	0.0212346
Klf11	1.11563	5.96053	23.406	0.000440256	0.0213166
Shc3	6.62049	-1.61112	34.1609	0.000451944	0.021773
Chd7	0.795047	6.59335	23.1539	0.000459858	0.0220369
Prag1	1.88925	3.61341	23.1242	0.000462227	0.0220749
Fbxl20	0.933048	6.73811	23.0472	0.000468456	0.0222521
Pfkl	1.69543	5.99628	23.0391	0.000469117	0.0222521
Luc7l3	0.784726	6.44744	22.8858	0.000481824	0.0227378
Cs	0.848938	7.94474	22.8765	0.000482607	0.0227378
Cdh24	1.6549	1.9741	22.7863	0.000490295	0.022921
Zcchc9	0.585271	5.75526	22.7547	0.000493013	0.022921
Phf20	0.73865	4.85051	22.7128	0.00049666	0.0230125
Dnajb6	0.76841	4.40891	22.4963	0.000515981	0.0234749
Atp12a	7.92533	0.342116	32.6953	0.000519793	0.0234749
Ncoa1	0.635262	5.795	22.3914	0.000525656	0.0234749
Nfic	0.774292	8.89898	22.3881	0.000525966	0.0234749
Tha1	1.73478	4.1325	22.374	0.000527281	0.0234749
Zfp72	1.09182	4.22041	22.3316	0.000531277	0.0235258
Zfand2a	1.24876	7.62708	21.9705	0.000566704	0.024627
Zfp292	0.563236	5.99633	21.8322	0.000581005	0.0250167
Qsox1	0.614331	8.83315	21.7459	0.000590136	0.0250167
Ski	0.546052	7.2706	21.7352	0.000591278	0.0250167
Cnst	1.00148	5.5164	21.7204	0.000592873	0.0250167
Hsdl1	0.65371	6.30514	21.6975	0.000595337	0.0250167
Alkbh1	0.769215	4.99495	21.5979	0.000606201	0.0253969
Morc4	1.32445	4.63561	21.555	0.000610962	0.025444
Gbe1	0.544926	8.40813	21.5017	0.000616918	0.0256158
Gpatch8	0.588145	6.18098	21.4307	0.000624981	0.0258738
Nat14	1.71421	2.44741	21.4017	0.000628302	0.0259193
Rorc	2.08233	7.00646	21.3728	0.000631636	0.0259193
Csnk1g3	0.568539	6.73737	21.336	0.000635915	0.0259301
Atf7	0.717102	6.97212	21.3343	0.000636112	0.0259301
Zfp184	1.67468	0.518596	21.2846	0.000641944	0.0259685
Nsun2	0.993108	7.63766	21.2727	0.000643344	0.0259685
Zfp651	1.49098	1.28913	21.2674	0.00064397	0.0259685
Phf20-ps	0.793392	4.50404	21.2317	0.00064821	0.0260644
Osgin1	1.38749	9.87864	21.1327	0.000660151	0.0262942
Pgam2	1.55945	1.54688	21.1221	0.000661442	0.0262942
Casc1	2.25627	0.941298	21.0648	0.000668491	0.0264992
Med13l	0.962205	6.22664	21.0383	0.000671771	0.0265539
Dapp1	3.43744	2.06096	21.0092	0.000675407	0.0266225
Adprm	0.992363	5.83485	20.9096	0.000688017	0.0269676
Atg4c	0.86682	4.83535	20.8606	0.000694319	0.0271381
Ythdc1	0.667906	6.66143	20.7826	0.000704489	0.0271568
Slc34a2	5.21389	2.51896	20.3886	0.000758639	0.0286552
Tshz1	0.822785	6.16486	20.3765	0.000760381	0.0286552
Ddb1	0.510296	8.73806	20.3618	0.000762492	0.0286552
Kin	0.615552	4.86161	20.2963	0.000772023	0.0288078
Acin1	0.493024	7.38445	20.2786	0.000774621	0.0288278
Thumpd2	0.874596	2.73397	20.1324	0.000796466	0.0295488
Eepd1	0.699192	5.39316	20.1209	0.000798217	0.0295488
Lrrc24	3.80769	-0.536464	20.0901	0.000802919	0.0296445
Mef2d	0.516148	7.53242	20.0593	0.000807668	0.0297413
Med20	0.701492	5.90579	19.9044	0.000832017	0.0300737
Nkiras1	0.728368	5.06118	19.8975	0.000833119	0.0300737
Rasal1	6.83343	-0.847497	22.6667	0.000843059	0.0302485
Baiap3	4.53015	-0.974887	19.7846	0.000851432	0.0303565
Nufip2	0.536193	7.53632	19.6999	0.000865487	0.030738
Polr1d	0.531712	7.22378	19.6829	0.000868348	0.0307615
Lgi3	1.63515	3.49681	19.6095	0.000880796	0.0311237
Pcdhac2	7.36785	-0.265945	22.2511	0.000899424	0.0312451
Thrsp	3.40917	8.12915	19.4961	0.000900423	0.0312451
Galr2	1.67578	1.71495	19.3994	0.000917595	0.0315477
Zfp143	0.813986	4.78911	19.2641	0.000942247	0.0322328
Rangap1	0.51051	7.20404	19.2523	0.000944433	0.0322328
Ak3l2-ps	1.16192	5.66835	19.2379	0.000947107	0.0322454
Zfp248	1.14239	3.77322	19.2178	0.000950871	0.032295
Fundc1	0.642148	4.58814	19.1778	0.000958382	0.0323928
Jmjd4	0.70625	5.68311	19.0952	0.000974127	0.0328457
Sema3c	3.87723	1.53728	19.0585	0.000981221	0.032959
C2cd4c	3.53311	0.920698	19.0535	0.000982198	0.032959
Kyat3	0.702472	5.65868	19.0316	0.000986464	0.033023
Vps37b	1.06633	5.19593	19.0032	0.000992034	0.0331302
Ubn2	0.516893	6.31977	18.9622	0.00100013	0.0332556
Usp37	0.57964	4.64095	18.9051	0.00101154	0.0334622
Umps	0.790023	7.26396	18.8171	0.00102942	0.0337187
Rbm15	0.545984	6.32123	18.8141	0.00103005	0.0337187
Zfp65	0.941392	5.79647	18.7296	0.00104758	0.0337187
Ddx3x	0.810194	9.51897	18.7246	0.00104863	0.0337187
Slc35f5	0.7221	6.76067	18.7233	0.0010489	0.0337187
Morc2a	0.672259	5.8566	18.6124	0.00107248	0.0339531
Tbc1d31	1.90859	4.38911	18.5243	0.00109167	0.0344825
Anapc7	0.459638	5.56423	18.4242	0.00111397	0.034869
Jmjd6	0.514447	6.38236	18.4229	0.00111426	0.034869
Mtor	0.943708	5.81859	18.3733	0.0011255	0.0350383
Zbtb1	0.614103	6.06645	18.2344	0.00115772	0.0356827
Adamtsl5	1.3777	4.23345	18.2059	0.00116446	0.0357331
Znrf3	0.618542	5.13761	18.1203	0.00118497	0.0359596
Nktr	0.592186	7.02774	18.1109	0.00118726	0.0359596
Fam124a	1.3659	9.48018	18.0527	0.0012015	0.0363124
Ceacam16	2.50226	1.69015	17.9898	0.0012171	0.0367044
Efnb3	2.69639	-0.441207	17.9271	0.00123288	0.0371005
Plcl1	1.39597	4.18139	17.9159	0.00123575	0.0371071
Cpsf7	0.567217	6.99642	17.8801	0.00124488	0.0372214
Klhl18	0.656222	4.88585	17.833	0.00125705	0.0374252
Tnfrsf1b	0.658674	6.01405	17.8042	0.00126457	0.0375692
Atp2a1	5.10402	-1.88338	20.0886	0.00127849	0.0377615
Rchy1	1.06231	6.5304	17.7387	0.00128183	0.0377615
Ankrd11	0.538489	8.35261	17.7387	0.00128183	0.0377615
Spty2d1	0.867672	7.23	17.7166	0.00128772	0.0377757
Kcnab1	1.92059	-0.253267	17.6929	0.00129407	0.0378827
Lpar2	0.775426	3.88536	17.6633	0.00130204	0.0379884
Taf1a	0.914798	3.90681	17.6371	0.00130915	0.0379884
Nup54	0.763941	5.26513	17.632	0.00131056	0.0379884
Prkab1	0.645559	5.91947	17.6294	0.00131126	0.0379884
Cend1	3.31096	-1.33852	17.6077	0.00131721	0.038082
Zfp110	0.649464	7.63083	17.578	0.00132538	0.0381655
Hook3	0.549475	7.29071	17.5774	0.00132555	0.0381655
Mrpl9	0.7525	6.83364	17.5654	0.00132885	0.0381819
Gssos1	2.21791	-0.224439	17.5395	0.00133606	0.0382686
Slc25a47	2.63197	8.66434	17.5349	0.00133734	0.0382686
Hlx	2.45712	4.52604	17.52	0.00134152	0.03831
Dgkd	0.687783	6.55665	17.4803	0.0013527	0.0385505
Ralgps1	0.834582	4.66194	17.4299	0.00136707	0.0388019
Pdrg1	0.781845	5.58509	17.4094	0.00137294	0.0388896
Slc25a32	0.987821	6.94598	17.3934	0.00137758	0.0389204
Ppp4r2	0.529921	6.1428	17.3831	0.00138053	0.0389204
Gtf2b	0.650599	4.16799	17.3215	0.00139854	0.0392582
Desi2	0.543695	8.05865	17.3063	0.00140304	0.0392654
Prpf38b	0.503787	7.77781	17.1648	0.00144557	0.0400885
Gon7	0.835229	3.55531	17.1609	0.00144677	0.0400885
Abl2	0.865073	7.12964	17.1449	0.00145168	0.040145
Atf7ip	0.528618	6.85219	17.0741	0.00147366	0.0406723
Ddo	1.58475	4.66506	17.0586	0.0014785	0.0407257
Prdm2	0.542026	7.12825	17.0251	0.0014891	0.0408567
Aebp2	0.748331	8.96197	16.8956	0.0015308	0.0418368
Ints13	0.553927	5.20967	16.841	0.00154878	0.042168
Bhlhe40	1.16863	9.93939	16.8269	0.00155349	0.042168
Zbtb40	0.935788	6.11226	16.8224	0.00155497	0.042168
Chd2	0.540229	7.29233	16.8134	0.00155799	0.0421682
Map7	0.498867	5.73849	16.8025	0.00156162	0.0421804
Zbtb11	0.632861	6.02915	16.7714	0.00157207	0.0422516
Irgq	0.766018	7.37318	16.7683	0.00157315	0.0422516
Pdik1l	0.617854	5.49429	16.7397	0.00158284	0.0423569
Lhx6	2.90497	5.38148	16.7231	0.00158852	0.0423686
Ern1	1.56206	8.3801	16.7198	0.00158962	0.0423686
Enpep	0.523796	5.07411	16.6804	0.00160316	0.0426485
Stk17b	0.69265	3.8152	16.6126	0.00162682	0.0428701
Prdm15	0.674298	4.69007	16.5971	0.00163228	0.0429213
Pkm	2.26453	6.39532	16.5591	0.00164577	0.0430452
Wdr43	1.17777	8.09519	16.5019	0.00166628	0.0433805
Arhgap32	0.489865	5.45554	16.4954	0.00166864	0.0433805
Utp14b	0.657532	5.83736	16.4688	0.00167831	0.0434901
Comt	1.10269	10.0186	16.4502	0.00168512	0.0435054
Nrip1	0.709445	6.92389	16.4271	0.0016936	0.0435405
Mapre3	0.579272	6.86976	16.4089	0.00170034	0.0435405
Eno1b	1.05463	8.76978	16.4064	0.00170127	0.0435405
Rpp14	0.782681	6.31823	16.3875	0.00170828	0.0435819
Fnip2	0.590952	6.1641	16.3764	0.00171243	0.0435819
BC002059	0.891317	3.33894	16.3748	0.001713	0.0435819
Zbtb43	0.500297	6.66597	16.344	0.00172455	0.0437961
Inafm1	1.1432	4.92519	16.3003	0.00174113	0.0439776
Ccdc162	1.05073	4.1187	16.2617	0.00175588	0.0442581
Pigc	0.564319	5.38282	16.2159	0.00177361	0.0442662
Nt5dc3	0.692969	6.9686	16.2132	0.00177468	0.0442662
Ypel2	1.04202	5.59126	16.2131	0.0017747	0.0442662
Aoc3	2.19261	2.30529	16.0963	0.00182088	0.0452568
Tcp11	3.63807	-1.70231	16.0881	0.00182418	0.0452583
Dennd4a	1.05531	6.64588	16.0526	0.00183853	0.0455337
Prmt5	0.704092	5.01467	16.0327	0.00184664	0.0455733
Cmip	0.78839	4.7864	15.9893	0.00186445	0.0457411
Rapgef5	2.13957	3.3434	15.9699	0.00187248	0.0457411
Cox19	0.553581	6.80995	15.8984	0.00190242	0.0462162
Slc5a3	0.678476	4.14913	15.7956	0.00194642	0.0471215
Gdf9	1.19701	2.17517	15.7705	0.00195736	0.0473046
Tnfrsf25	3.58108	0.297956	15.7387	0.00197132	0.0473844
Zfp146	0.975675	7.37247	15.731	0.00197474	0.0473844
Btbd9	0.729054	6.1922	15.722	0.00197871	0.0473844
Noa1	0.512871	5.58046	15.6978	0.00198945	0.0475059
B4galt6	1.37482	3.40028	15.6012	0.00203305	0.0481363
Tom1l2	0.654483	6.83849	15.5612	0.0020514	0.0484835
Fam118b	0.551971	4.71727	15.5542	0.00205465	0.0484835
Cwc22	0.590864	4.33512	15.5402	0.00206115	0.0485549
Scd1	0.977547	14.0326	15.5131	0.00207378	0.0487705
Slx4	0.554198	5.09989	15.4911	0.00208408	0.0488348
Smg9	0.902217	3.83833	15.4894	0.0020849	0.0488348
Grin3a	2.29847	-0.316418	15.4775	0.00209048	0.0488348
Cyp2d38-ps	2.78212	2.68383	15.4341	0.00211112	0.0490889
Meox1	2.82321	0.857943	15.4326	0.00211183	0.0490889
Tmem131l	1.12658	5.03086	15.4325	0.00211188	0.0490889
Wdr3	0.679917	5.38598	15.3734	0.00214034	0.0494266
Ripor3	4.25983	1.99337	15.3565	0.00214855	0.0495299
