# Supplementary material for: KLF10 integrates circadian timing and sugar signaling to coordinate hepatic metabolism
Source: eLife. 2021 Aug 17;10:e65574. doi: 10.7554/eLife.65574 (PMC8410083; doi:10.7554/eLife.65574)
Supplement: Figure 6—source data 2. [file elife-65574-fig6-data2.xlsx]

## Sheet: KEGG_WT_down
KEGG enriched pathway in WT and HepKO hepatocytes challenged with high sugar compared to unchallenged cells.
Term	Overlap	P-value	Adjusted P-value	Odds Ratio	Combined Score	Genes
Valine, leucine and isoleucine degradation	13/56	8.00362e-12	2.4251e-09	13.6154	347.889	MCCC2;ECHS1;MCCC1;ABAT;MUT;ACADSB;ACAT1;ALDH6A1;PCCA;ALDH1B1;IVD;DBT;ALDH9A1
Propanoate metabolism	7/31	7.2831e-07	0.000110339	13.2438	187.168	ALDH6A1;ECHS1;PCCA;DBT;ABAT;MUT;ACAT1
Fatty acid degradation	8/50	1.89266e-06	0.000191159	9.38416	123.66	CPT1A;ECHS1;ALDH1B1;ECI2;ACSL4;ACADSB;ALDH9A1;ACAT1
beta-Alanine metabolism	6/32	1.4651e-05	0.00088785	10.9971	122.408	ALDH6A1;ECHS1;ALDH1B1;ABAT;UPB1;ALDH9A1
Peroxisome	9/84	1.31122e-05	0.000993249	6.28404	70.645	NUDT7;MVK;ACOX2;ECI2;IDH2;MPV17L2;ACSL4;CROT;DECR2
p53 signaling pathway	7/71	0.000205485	0.010377	5.7825	49.0942	SESN3;SIVA1;CDK4;PERP;SHISA5;BCL2;BBC3
Lysine degradation	6/59	0.000495059	0.021429	5.96451	45.3949	SETD3;ECHS1;ALDH1B1;SUV39H1;ALDH9A1;ACAT1
Butanoate metabolism	4/27	0.00106868	0.0404761	8.68904	59.4446	ECHS1;ABAT;L2HGDH;ACAT1
Tryptophan metabolism	5/48	0.00131334	0.0442157	6.10948	40.5375	ECHS1;ALDH1B1;KYAT1;ACAT1;ALDH9A1
Pyruvate metabolism	4/38	0.00388042	0.117577	6.17379	34.2757	ALDH1B1;PCK1;ACAT1;ALDH9A1
Histidine metabolism	3/24	0.00762488	0.192528	7.33138	35.7503	ALDH1B1;AMDHD1;ALDH9A1
Phenylalanine, tyrosine and tryptophan biosynthesis	2/8	0.00758291	0.208875	14.6628	71.5815	TAT;PAH
Ascorbate and aldarate metabolism	3/27	0.010613	0.214382	6.51678	29.6232	ALDH1B1;UGT2B35;ALDH9A1
Cysteine and methionine metabolism	4/50	0.0103246	0.223453	4.69208	21.458	MPST;CBS;TAT;KYAT1
Sulfur metabolism	2/9	0.00964021	0.224691	13.0336	60.4993	MPST;SQOR
Measles	7/144	0.0118757	0.224896	2.85109	12.6396	CDK4;BCL2;FADD;IRAK4;TYK2;NFKBIB;BBC3
Ubiquinone and other terpenoid-quinone biosynthesis	2/11	0.0144006	0.256669	10.6638	45.2198	GGCX;TAT
Glyoxylate and dicarboxylate metabolism	3/31	0.0155153	0.261175	5.67591	23.6454	PCCA;MUT;ACAT1
Lysosome	6/124	0.0196327	0.31309	2.83795	11.1547	CTSO;GNPTAB;SLC11A1;SLC17A5;NAGA;SGSH
Glycolysis / Gluconeogenesis	4/67	0.0274791	0.416309	3.50155	12.5857	ALDH1B1;PCK1;GCK;ALDH9A1
Selenocompound metabolism	2/17	0.0332985	0.438671	6.90012	23.4759	KYAT1;SCLY
Ubiquitin mediated proteolysis	6/138	0.0311026	0.448766	2.55004	8.84984	FBXW7;UBE2U;UBE2L6;TRIM37;KLHL13;RHOBTB2
Hedgehog signaling pathway	3/44	0.0389172	0.453535	3.99893	12.9818	SMO;BCL2;CSNK1G2
Adipocytokine signaling pathway	4/71	0.0330615	0.455347	3.30428	11.2656	CPT1A;ACSL4;PCK1;NFKBIB
Inositol phosphate metabolism	4/73	0.0360829	0.455547	3.21375	10.6759	INPP5B;ALDH6A1;MTMR14;MTMR4
Toxoplasmosis	5/108	0.0376318	0.456097	2.71533	8.90601	BCL2;IRAK4;TYK2;MAP2K6;NFKBIB
Glycosphingolipid biosynthesis	3/45	0.0411872	0.462212	3.91007	12.4717	B3GALT1;NAGA;B4GALNT1
NOD-like receptor signaling pathway	7/205	0.0622835	0.555056	2.00272	5.55966	PANX1;NAIP2;BCL2;FADD;TYK2;IRAK4;NFKBIB
Protein processing in endoplasmic reticulum	6/163	0.0608935	0.559113	2.15893	6.04205	SELENOS;ATF6B;EDEM1;BCL2;SVIP;PDIA4
Terpenoid backbone biosynthesis	2/23	0.0579603	0.566516	5.10009	14.525	MVK;ACAT1
Hepatitis B	6/163	0.0608935	0.576585	2.15893	6.04205	ATF6B;BCL2;FADD;IRAK4;TYK2;MAP2K6
Tight junction	6/167	0.0668278	0.578538	2.10722	5.70138	DLG3;CDK4;MYH14;PRKCZ;LLGL2;MYL12B
Arginine and proline metabolism	3/50	0.053506	0.579011	3.51906	10.3037	ALDH4A1;ALDH1B1;ALDH9A1
Phenylalanine metabolism	2/23	0.0579603	0.585399	5.10009	14.525	TAT;PAH
PPAR signaling pathway	4/85	0.0574513	0.600267	2.76005	7.88496	CPT1A;ACOX2;ACSL4;PCK1
Folate biosynthesis	2/26	0.0720367	0.606309	4.51162	11.8682	PAH;MOCS1
Neomycin, kanamycin and gentamicin biosynthesis	1/5	0.0823998	0.674787	11.7302	29.2806	GCK
Axon guidance	6/180	0.0883562	0.68646	1.95503	4.74365	SMO;SEMA4G;PRKCZ;EPHB4;NGEF;MYL12B
Phosphatidylinositol signaling system	4/98	0.0867252	0.691519	2.39392	5.85316	INPP5B;MTMR14;MTMR4;IP6K2
Epstein-Barr virus infection	7/229	0.0979654	0.706751	1.79283	4.16499	CDK4;BCL2;FADD;TYK2;IRAK4;MAP2K6;NFKBIB
Galactose metabolism	2/32	0.10296	0.70902	3.66569	8.33363	MGAM;GCK
Glutathione metabolism	3/64	0.0959471	0.709073	2.74927	6.44417	GGT6;IDH2;OPLAH
AGE-RAGE signaling pathway in diabetic complications	4/101	0.0943389	0.714617	2.32281	5.48384	CDK4;PIM1;BCL2;PRKCZ
Citrate cycle (TCA cycle)	2/32	0.10296	0.725509	3.66569	8.33363	IDH2;PCK1
Starch and sucrose metabolism	2/33	0.108417	0.730011	3.55461	7.89751	MGAM;GCK
Pentose and glucuronate interconversions	2/34	0.11395	0.750583	3.45006	7.49352	UGT2B35;DCXR
Insulin resistance	4/110	0.118968	0.766964	2.13276	4.54044	CPT1A;NR1H2;PCK1;PRKCZ
Alanine, aspartate and glutamate metabolism	2/37	0.130957	0.809792	3.17033	6.44492	ALDH4A1;ABAT
Sulfur relay system	1/8	0.128553	0.81149	7.33138	15.0397	MPST
Tyrosine metabolism	2/40	0.148497	0.899889	2.93255	5.59294	TAT;FAH
Porphyrin and chlorophyll metabolism	2/41	0.154445	0.899939	2.86103	5.34416	UGT2B35;MMAB
Neurotrophin signaling pathway	4/121	0.152379	0.905311	1.93888	3.64777	PSEN2;BCL2;IRAK4;NFKBIB
Mineral absorption	2/44	0.172548	0.950582	2.66596	4.6843	MT2;MT1
Taurine and hypotaurine metabolism	1/11	0.172391	0.967305	5.33191	9.37345	GGT6
Autophagy	4/130	0.182037	0.984953	1.80465	3.07429	MTMR14;BCL2;MTMR4;TRP53INP2
Synthesis and degradation of ketone bodies	1/11	0.172391	0.985556	5.33191	9.37345	ACAT1
Complement and coagulation cascades	3/88	0.189874	1	1.99947	3.32191	PROS1;MASP1;MBL2
Steroid hormone biosynthesis	3/89	0.194202	1	1.977	3.24002	SRD5A2;UGT2B35;CYP3A13
Type II diabetes mellitus	2/48	0.197172	1	2.44379	3.96794	PRKCZ;GCK
Amino sugar and nucleotide sugar metabolism	2/49	0.203396	1	2.39392	3.81256	AMDHD2;GCK
Notch signaling pathway	2/49	0.203396	1	2.39392	3.81256	APH1B;PSEN2
N-Glycan biosynthesis	2/50	0.209641	1	2.34604	3.66536	ALG6;DOLPP1
Insulin signaling pathway	4/139	0.213413	1	1.6878	2.60685	MKNK2;PCK1;PRKCZ;GCK
Fatty acid biosynthesis	1/14	0.21403	1	4.18936	6.45848	ACSL4
Chemical carcinogenesis	3/94	0.216189	1	1.87184	2.86692	UGT2B35;CYP3A13;KYAT1
Apoptosis	4/141	0.220583	1	1.66386	2.5149	CTSO;BCL2;FADD;BBC3
Amyotrophic lateral sclerosis (ALS)	2/52	0.222187	1	2.25581	3.39327	BCL2;MAP2K6
Thiamine metabolism	1/15	0.22744	1	3.91007	5.79029	THTPA
Glycosaminoglycan biosynthesis	2/53	0.228483	1	2.21325	3.26741	CHST12;CHST13
Toll-like receptor signaling pathway	3/99	0.238664	1	1.7773	2.54634	FADD;IRAK4;MAP2K6
Primary bile acid biosynthesis	1/16	0.240622	1	3.66569	5.22187	ACOX2
T cell receptor signaling pathway	3/101	0.247764	1	1.74211	2.43073	CDK4;NFKBIB;VAV2
Glucagon signaling pathway	3/102	0.252334	1	1.72503	2.37537	CPT1A;PCK1;GCK
Pyrimidine metabolism	2/58	0.260097	1	2.02245	2.72363	NT5C;UPB1
HIF-1 signaling pathway	3/104	0.261511	1	1.69186	2.26925	EGLN2;MKNK2;BCL2
Other glycan degradation	1/18	0.266317	1	3.25839	4.31107	NEU2
Pantothenate and CoA biosynthesis	1/18	0.266317	1	3.25839	4.31107	UPB1
Steroid biosynthesis	1/19	0.278838	1	3.0869	3.94235	CYP2R1
Glycerolipid metabolism	2/61	0.279101	1	1.92298	2.45408	ALDH1B1;ALDH9A1
Hippo signaling pathway	4/159	0.287492	1	1.4755	1.8393	DLG3;PRKCZ;LLGL2;BBC3
TNF signaling pathway	3/110	0.289265	1	1.59957	1.98413	ATF6B;FADD;MAP2K6
Glycosaminoglycan degradation	1/21	0.303243	1	2.79291	3.33255	SGSH
Mismatch repair	1/22	0.315136	1	2.66596	3.07852	MLH3
Proximal tubule bicarbonate reclamation	1/22	0.315136	1	2.66596	3.07852	PCK1
Leishmaniasis	2/67	0.31696	1	1.75078	2.0116	IRAK4;NFKBIB
Influenza A	4/168	0.322005	1	1.39645	1.58244	IRAK4;TYK2;MAP2K6;NFKBIB
Fc epsilon RI signaling pathway	2/68	0.323232	1	1.72503	1.94822	VAV2;MAP2K6
RIG-I-like receptor signaling pathway	2/68	0.323232	1	1.72503	1.94822	FADD;NFKBIB
B cell receptor signaling pathway	2/72	0.348161	1	1.6292	1.71895	VAV2;NFKBIB
Glycosylphosphatidylinositol (GPI)-anchor biosynthesis	1/25	0.349611	1	2.34604	2.46553	PIGA
Viral carcinogenesis	5/229	0.352206	1	1.28059	1.33635	HDAC3;ATF6B;CDK4;HDAC11;HPN
Thyroid hormone synthesis	2/73	0.354347	1	1.60688	1.6671	ATF6B;PDIA4
Thermogenesis	5/231	0.358958	1	1.2695	1.30067	CPT1A;NDUFAF7;NDUFAF3;ACSL4;SMARCA2
Maturity onset diabetes of the young	1/27	0.371628	1	2.17226	2.15024	GCK
Synaptic vesicle cycle	2/77	0.378872	1	1.5234	1.47855	SYT1;SLC6A12
Mucin type O-glycan biosynthesis	1/28	0.382357	1	2.09468	2.01383	GCNT4
Fatty acid elongation	1/29	0.392902	1	2.02245	1.88936	ECHS1
Estrogen signaling pathway	3/134	0.400787	1	1.31308	1.20058	ATF6B;BCL2;FKBP5
Purine metabolism	3/136	0.409936	1	1.29377	1.15373	NT5C;GDA;PRUNE1
Insulin secretion	2/86	0.432518	1	1.36398	1.14319	ATF6B;GCK
Th1 and Th2 cell differentiation	2/87	0.438329	1	1.3483	1.11206	TYK2;NFKBIB
Focal adhesion	4/199	0.441252	1	1.17892	0.964517	BCL2;DOCK1;MYL12B;VAV2
Fluid shear stress and atherosclerosis	3/143	0.441597	1	1.23044	1.00571	BCL2;PRKCZ;MAP2K6
Colorectal cancer	2/88	0.444107	1	1.33298	1.08197	BCL2;BBC3
GABAergic synapse	2/90	0.455563	1	1.30336	1.02473	SLC6A12;ABAT
Retinol metabolism	2/91	0.46124	1	1.28903	0.997502	UGT2B35;CYP3A13
Nicotinate and nicotinamide metabolism	1/36	0.461861	1	1.6292	1.25854	NT5C
Adrenergic signaling in cardiomyocytes	3/148	0.463807	1	1.18887	0.913396	ATF6B;BCL2;SCN1B
Small cell lung cancer	2/92	0.466882	1	1.27502	0.971156	CDK4;BCL2
Staphylococcus aureus infection	2/95	0.483597	1	1.23476	0.897055	MASP1;MBL2
Prostate cancer	2/97	0.494559	1	1.2093	0.851454	SRD5A2;BCL2
Ferroptosis	1/40	0.4977	1	1.46628	1.02311	ACSL4
Glycine, serine and threonine metabolism	1/40	0.4977	1	1.46628	1.02311	CBS
Kaposi sarcoma-associated herpesvirus infection	4/216	0.504243	1	1.08613	0.74367	CDK4;FADD;TYK2;MAP2K6
Bladder cancer	1/41	0.506281	1	1.43051	0.973698	CDK4
Homologous recombination	1/41	0.506281	1	1.43051	0.973698	BABAM1
Regulation of actin cytoskeleton	4/217	0.507855	1	1.08112	0.732526	MYH14;DOCK1;MYL12B;VAV2
Cushing syndrome	3/159	0.511229	1	1.10662	0.742475	ATF6B;CDK4;WDR5B
Hepatitis C	3/160	0.515432	1	1.09971	0.728832	CDK4;FADD;TYK2
Longevity regulating pathway	2/102	0.521309	1	1.15002	0.749136	SESN3;ATF6B
NF-kappa B signaling pathway	2/102	0.521309	1	1.15002	0.749136	BCL2;IRAK4
Th17 cell differentiation	2/102	0.521309	1	1.15002	0.749136	TYK2;NFKBIB
Carbohydrate digestion and absorption	1/43	0.523008	1	1.36398	0.884074	MGAM
Vasopressin-regulated water reabsorption	1/43	0.523008	1	1.36398	0.884074	DYNLL2
Chagas disease (American trypanosomiasis)	2/103	0.526545	1	1.13885	0.730483	FADD;IRAK4
JAK-STAT signaling pathway	3/164	0.532046	1	1.07288	0.677018	PIM1;BCL2;TYK2
Parathyroid hormone synthesis, secretion and action	2/107	0.547098	1	1.09628	0.661198	ATF6B;BCL2
Hepatocellular carcinoma	3/171	0.560335	1	1.02897	0.595999	FRAT2;CDK4;SMARCA2
Cocaine addiction	1/48	0.562394	1	1.2219	0.703267	ATF6B
Sphingolipid metabolism	1/48	0.562394	1	1.2219	0.703267	NEU2
Alzheimer disease	3/175	0.57603	1	1.00545	0.5546	APH1B;PSEN2;FADD
Linoleic acid metabolism	1/50	0.577224	1	1.17302	0.644603	CYP3A13
Human papillomavirus infection	6/360	0.579369	1	0.977517	0.533544	DLG3;CDK4;FADD;TYK2;PRKCZ;LLGL2
Necroptosis	3/176	0.579899	1	0.999733	0.544757	BCL2;FADD;TYK2
Human immunodeficiency virus 1 infection	4/238	0.58072	1	0.985732	0.535732	BCL2;FADD;IRAK4;MAP2K6
Drug metabolism	2/114	0.581542	1	1.02897	0.557774	UGT2B35;UPB1
Leukocyte transendothelial migration	2/115	0.586303	1	1.02002	0.544607	MYL12B;VAV2
Tuberculosis	3/178	0.58757	1	0.9885	0.525646	BCL2;FADD;IRAK4
Herpes simplex virus 1 infection	7/433	0.609389	1	0.948169	0.469627	BCL2;FADD;TYK2;IRAK4;ZFP551;ZFP808;ZFP28
Cellular senescence	3/185	0.613704	1	0.951098	0.464367	CDK4;MAP2K6;LIN52
Sphingolipid signaling pathway	2/124	0.627345	1	0.945984	0.441074	BCL2;PRKCZ
Legionellosis	1/58	0.631702	1	1.01122	0.464494	NAIP2
Platelet activation	2/125	0.631705	1	0.938416	0.431046	PRKCZ;MYL12B
Human cytomegalovirus infection	4/255	0.634948	1	0.920016	0.417883	ATF6B;CDK4;FADD;MAP2K6
AMPK signaling pathway	2/126	0.636025	1	0.930969	0.421279	CPT1A;PCK1
Osteoclast differentiation	2/128	0.644547	1	0.916422	0.4025	TYK2;MAP2K6
Cytosolic DNA-sensing pathway	1/61	0.650274	1	0.961492	0.413789	NFKBIB
Chemokine signaling pathway	3/197	0.655858	1	0.893163	0.376745	PRKCZ;VAV2;NFKBIB
Relaxin signaling pathway	2/131	0.657033	1	0.895436	0.376101	ATF6B;PRKCZ
Basal cell carcinoma	1/63	0.662134	1	0.930969	0.383826	SMO
Alcoholism	3/199	0.662555	1	0.884186	0.363977	HDAC3;ATF6B;HDAC11
Central carbon metabolism in cancer	1/64	0.667913	1	0.916422	0.369865	GCK
Proteoglycans in cancer	3/203	0.675663	1	0.866764	0.339824	SMO;ANK3;VAV2
Aminoacyl-tRNA biosynthesis	1/66	0.679177	1	0.888652	0.343796	GATB
Metabolism of xenobiotics by cytochrome P450	1/66	0.679177	1	0.888652	0.343796	UGT2B35
Non-small cell lung cancer	1/66	0.679177	1	0.888652	0.343796	CDK4
Amphetamine addiction	1/68	0.690059	1	0.862515	0.319974	ATF6B
Renal cell carcinoma	1/68	0.690059	1	0.862515	0.319974	EGLN2
Acute myeloid leukemia	1/69	0.695362	1	0.850015	0.30883	PIM1
Cortisol synthesis and secretion	1/69	0.695362	1	0.850015	0.30883	ATF6B
Pathways in cancer	8/535	0.695521	1	0.877025	0.318442	FRAT2;EGLN2;SMO;CDK4;PIM1;BCL2;FADD;BBC3
Adherens junction	1/72	0.710733	1	0.814598	0.278151	SSX2IP
Melanoma	1/72	0.710733	1	0.814598	0.278151	CDK4
Prolactin signaling pathway	1/72	0.710733	1	0.814598	0.278151	GCK
Breast cancer	2/147	0.717776	1	0.797973	0.264607	FRAT2;CDK4
Bacterial invasion of epithelial cells	1/74	0.720548	1	0.792581	0.259763	DOCK1
Gastric acid secretion	1/74	0.720548	1	0.792581	0.259763	SSTR2
Glioma	1/75	0.72533	1	0.782014	0.251127	CDK4
Pancreatic cancer	1/75	0.72533	1	0.782014	0.251127	CDK4
Gastric cancer	2/150	0.728104	1	0.782014	0.248141	FRAT2;BCL2
Chronic myeloid leukemia	1/76	0.730031	1	0.771724	0.242837	CDK4
Pertussis	1/76	0.730031	1	0.771724	0.242837	IRAK4
MAPK signaling pathway	4/294	0.741239	1	0.797973	0.238939	MKNK2;IRAK4;MAP3K13;MAP2K6
RNA degradation	1/83	0.760765	1	0.706639	0.193217	TOB1
Fc gamma R-mediated phagocytosis	1/87	0.776734	1	0.67415	0.170329	VAV2
Arachidonic acid metabolism	1/89	0.784315	1	0.659	0.1601	PTGES2
GnRH signaling pathway	1/90	0.788009	1	0.651678	0.15526	MAP2K6
Human T-cell leukemia virus 1 infection	3/245	0.791019	1	0.718176	0.168364	ATF6B;CDK4;TCF3
IL-17 signaling pathway	1/91	0.79164	1	0.644517	0.150591	FADD
TGF-beta signaling pathway	1/91	0.79164	1	0.644517	0.150591	HFE2
mRNA surveillance pathway	1/96	0.808884	1	0.610948	0.129582	MSI2
Transcriptional misregulation in cancer	2/183	0.821926	1	0.640995	0.125702	TCF3;KLF3
Aldosterone synthesis and secretion	1/102	0.827709	1	0.57501	0.108731	ATF6B
Calcium signaling pathway	2/189	0.835492	1	0.620646	0.111551	ORAI3;TPCN1
Amoebiasis	1/106	0.83922	1	0.553312	0.0969855	SERPINB9
Cholinergic synapse	1/113	0.85755	1	0.519036	0.0797632	BCL2
PI3K-Akt signaling pathway	4/357	0.860987	1	0.657154	0.0983599	ATF6B;CDK4;BCL2;PCK1
Thyroid hormone signaling pathway	1/115	0.862393	1	0.510009	0.0755037	HDAC3
Natural killer cell mediated cytotoxicity	1/118	0.869352	1	0.497043	0.0695895	VAV2
Rap1 signaling pathway	2/209	0.874226	1	0.561254	0.0754416	PRKCZ;MAP2K6
cAMP signaling pathway	2/211	0.8776	1	0.555934	0.0725852	SSTR2;VAV2
Cell cycle	1/123	0.880179	1	0.476838	0.0608587	CDK4
Inflammatory mediator regulation of TRP channels	1/127	0.888193	1	0.461819	0.0547563	MAP2K6
FoxO signaling pathway	1/132	0.897462	1	0.444326	0.048069	PCK1
Dopaminergic synapse	1/135	0.902652	1	0.434452	0.0444958	ATF6B
Signaling pathways regulating pluripotency of stem cells	1/137	0.905966	1	0.42811	0.0422776	TCF3
Parkinson disease	1/144	0.916702	1	0.407299	0.0354241	UBE2L6
Wnt signaling pathway	1/160	0.936872	1	0.366569	0.0239035	FRAT2
Endocytosis	2/269	0.945617	1	0.436067	0.0243838	STAMBP;PRKCZ
cGMP-PKG signaling pathway	1/172	0.948732	1	0.340994	0.0179463	ATF6B
MicroRNAs in cancer	2/281	0.954237	1	0.417445	0.0195544	PIM1;BCL2
Phagosome	1/180	0.955376	1	0.325839	0.0148747	MBL2
Huntington disease	1/192	0.963767	1	0.305474	0.0112738	BBC3
Neuroactive ligand-receptor interaction	1/348	0.99761	1	0.168537	0.000403297	SSTR2

## Sheet: KEGG_WT_up
KEGG enriched pathway in WT and HepKO hepatocytes challenged with high sugar compared to unchallenged cells.
Term	Overlap	P-value	Adjusted P-value	Odds Ratio	Combined Score	Genes
Insulin signaling pathway	15/139	2.20487e-06	0.000668075	4.30793	56.1101	PTPN1;SHC2;G6PC;SHC3;PKLR;IRS2;SLC2A4;PYGL;CBL;ACACA;CRKL;FASN;EIF4E2;SOS1;SOS2
Glycolysis / Gluconeogenesis	9/67	4.25299e-05	0.00644328	5.36241	53.9743	GPI1;G6PC;PKLR;PGAM2;ENO1;DLAT;ALDOB;PDHB;GAPDH
AMPK signaling pathway	10/126	0.0012832	0.0555442	3.16827	21.0956	G6PC;PFKFB3;FASN;LEPR;IRS2;PPP2R2A;ULK1;SLC2A4;ADIPOR2;ACACA
HIF-1 signaling pathway	9/104	0.00120986	0.0610981	3.45463	23.2056	CREBBP;PFKFB3;TFRC;EP300;PRKCA;ENO1;PDHB;EIF4E2;GAPDH
ErbB signaling pathway	8/84	0.00120745	0.0731712	3.80192	25.546	STAT5B;SHC2;SHC3;PRKCA;SOS1;CBL;SOS2;CRKL
Glucagon signaling pathway	9/102	0.00105379	0.0798249	3.52237	24.1471	CREBBP;G6PC;PGAM2;ITPR1;EP300;SLC2A2;PYGL;PDHB;ACACA
Prolactin signaling pathway	7/72	0.00214677	0.0813091	3.88113	23.8448	STAT5B;SHC2;SHC3;SLC2A2;SOS1;SOS2;SOCS7
Pyruvate metabolism	5/38	0.00245294	0.0825823	5.25265	31.5709	PKLR;ME1;PDHB;DLAT;ACACA
Chronic myeloid leukemia	7/76	0.00292537	0.0886386	3.67686	21.452	STAT5B;SHC2;SHC3;SOS1;CBL;SOS2;CRKL
RNA transport	12/167	0.00105265	0.106318	2.86851	19.6678	FXR1;UPF2;NUP205;POM121;FXR2;NCBP1;XPOT;NUP50;NUP153;NUP54;RANGAP1;EIF4E2
Maturity onset diabetes of the young	4/27	0.00432168	0.119043	5.9141	32.197	PKLR;SLC2A2;BHLHA15;FOXA3
Starch and sucrose metabolism	4/33	0.00895623	0.180916	4.83881	22.8169	GPI1;G6PC;GBE1;PYGL
Adipocytokine signaling pathway	6/71	0.00869866	0.188264	3.37353	16.006	G6PC;LEPR;IRS2;SLC2A4;TNFRSF1B;ADIPOR2
Cysteine and methionine metabolism	5/50	0.00810686	0.188952	3.99202	19.2217	AHCYL2;MAT2A;GSS;DNMT3A;KYAT3
Glioma	6/75	0.0112553	0.189464	3.19361	14.3295	SHC2;SHC3;CAMK4;PRKCA;SOS1;SOS2
Fructose and mannose metabolism	4/35	0.0110203	0.19642	4.5623	20.567	PFKFB3;TKFC;ALDOB;KHK
mRNA surveillance pathway	7/96	0.0104334	0.197582	2.91084	13.2814	UPF2;CPSF7;NCBP1;PCF11;CSTF1;PPP2R2A;SMG6
Pentose phosphate pathway	4/32	0.00802639	0.202666	4.99002	24.0769	GPI1;RPIA;ALDOB;PGD
FoxO signaling pathway	8/132	0.0181695	0.275268	2.4194	9.69699	CREBBP;G6PC;EP300;IRS2;SLC2A4;FBXO32;SOS1;SOS2
Glycine, serine and threonine metabolism	4/40	0.0174477	0.278245	3.99202	16.1619	AOC3;AOC2;THA1;PGAM2
Insulin resistance	7/110	0.0207449	0.299319	2.54037	9.84511	MLXIPL;PTPN1;G6PC;SLC2A2;IRS2;SLC2A4;PYGL
JAK-STAT signaling pathway	9/164	0.0226439	0.311868	2.19074	8.29823	IL15RA;STAT5B;CREBBP;LEPR;EP300;IL20RB;SOS1;SOCS7;SOS2
Renal cell carcinoma	5/68	0.0277414	0.323294	2.93531	10.5226	CREBBP;EP300;SOS1;SOS2;CRKL
Phospholipase D signaling pathway	8/149	0.0342347	0.32416	2.14336	7.23282	SHC2;DGKD;SHC3;GNA12;LPAR2;PRKCA;SOS1;SOS2
Non-small cell lung cancer	5/66	0.0247566	0.326142	3.02425	11.1857	STAT5B;RASSF1;PRKCA;SOS1;SOS2
Long-term potentiation	5/67	0.0262219	0.331052	2.97912	10.8474	CREBBP;CAMK4;ITPR1;EP300;PRKCA
Notch signaling pathway	4/49	0.0339793	0.33212	3.25879	11.0212	JAG2;CREBBP;JAG1;EP300
Fc epsilon RI signaling pathway	5/68	0.0277414	0.336226	2.93531	10.5226	MAP2K3;LYN;PRKCA;SOS1;SOS2
Phosphatidylinositol signaling system	6/98	0.0366379	0.336402	2.44409	8.08181	PIKFYVE;DGKD;ITPR1;PI4KA;PRKCA;IP6K1
Bacterial invasion of epithelial cells	5/74	0.0380253	0.338872	2.69731	8.81886	SHC2;SHC3;CBL;BCAR1;CRKL
Neurotrophin signaling pathway	7/121	0.0327009	0.341668	2.30943	7.89907	SHC2;SHC3;CAMK4;SOS1;SOS2;CRKL;ZFP110
Cholesterol metabolism	4/49	0.0339793	0.343191	3.25879	11.0212	ABCA1;LIPG;ANGPTL8;PCSK9
Breast cancer	8/147	0.0319696	0.345957	2.17253	7.47994	JAG2;SHC2;SHC3;JAG1;FZD6;SOS1;SOS2;FGF21
Type II diabetes mellitus	4/48	0.0318133	0.357016	3.32668	11.47	PKLR;SLC2A2;IRS2;SLC2A4
Spliceosome	7/132	0.0485553	0.387164	2.11698	6.40397	TCERG1;PRPF38B;RBM25;RBMXL1;NCBP1;PPIE;TXNL4A
Regulation of actin cytoskeleton	10/217	0.047333	0.387619	1.83964	5.61191	PIKFYVE;SPATA13;GNA12;LPAR2;SOS1;SOS2;GIT1;BCAR1;CRKL;FGF21
Citrate cycle (TCA cycle)	3/32	0.0453097	0.392253	3.74251	11.5802	ACLY;PDHB;DLAT
Fatty acid biosynthesis	2/14	0.0467094	0.393137	5.70288	17.4725	FASN;ACACA
Hepatitis B	8/163	0.0531618	0.402701	1.95927	5.74932	MAP2K3;STAT5B;CREBBP;DDX3X;EP300;PRKCA;SOS1;SOS2
Parathyroid hormone synthesis, secretion and action	6/107	0.0523589	0.406788	2.23851	6.6028	CYP27B1;GNA12;ITPR1;PDE4B;PRKCA;MEF2D
Ubiquitin mediated proteolysis	7/138	0.0589581	0.435714	2.02494	5.73245	HERC2;HERC1;ANAPC7;NEDD4L;UBA2;RCHY1;CBL
Focal adhesion	9/199	0.0636815	0.459417	1.80543	4.97191	SHC2;SHC3;PRKCA;ARHGAP5;SOS1;SOS2;PGF;BCAR1;CRKL
Ras signaling pathway	10/233	0.0694436	0.467587	1.71331	4.56981	RASSF1;SHC2;SHC3;NF1;PRKCA;RAPGEF5;SOS1;SOS2;PGF;FGF21
Long-term depression	4/61	0.0665014	0.468603	2.61772	7.0954	LYN;GNA12;ITPR1;PRKCA
Thyroid hormone signaling pathway	6/115	0.0693155	0.477331	2.08279	5.55915	RCAN1;CREBBP;EP300;PRKCA;GATA4;MED13L
Natural killer cell mediated cytotoxicity	6/118	0.0764037	0.49256	2.02984	5.22019	SHC2;SHC3;SH3BP2;PRKCA;SOS1;SOS2
TGF-beta signaling pathway	5/91	0.0784032	0.49492	2.19342	5.5842	CREBBP;TFDP1;ID2;EP300;SMAD5
GnRH signaling pathway	5/90	0.0755667	0.497755	2.21779	5.72796	MAP2K3;ITPR1;PRKCA;SOS1;SOS2
Pathways in cancer	19/535	0.0815171	0.504075	1.41773	3.55416	JAG2;IL15RA;STAT5B;CREBBP;JAG1;DAPK1;MAX;FZD6;LPAR2;PRKCA;CBL;PGF;CRKL;RASSF1;GNA12;EP300;SOS1;SOS2;FGF21
mTOR signaling pathway	7/154	0.0929428	0.55219	1.81455	4.31096	FZD6;PRKCA;ULK1;EIF4E2;SOS1;SOS2;FNIP2
Carbohydrate digestion and absorption	3/43	0.0924854	0.560461	2.78513	6.63057	G6PC;SLC2A2;SLC37A4
Autophagy	6/130	0.108661	0.633159	1.84247	4.0894	UVRAG;DAPK1;ITPR1;IRS2;ULK1;NRBF2
Longevity regulating pathway	5/102	0.113241	0.635409	1.95687	4.26253	CAMK4;IRS2;ULK1;EIF4E2;ADIPOR2
Phenylalanine metabolism	2/23	0.112246	0.64171	3.47132	7.59198	AOC3;AOC2
Chemokine signaling pathway	8/197	0.12293	0.677231	1.62112	3.39811	LYN;STAT5B;SHC2;SHC3;SOS1;SOS2;BCAR1;CRKL
Rap1 signaling pathway	8/209	0.155451	0.841102	1.52804	2.84434	MAP2K3;LPAR2;PRKCA;RAPGEF5;PGF;BCAR1;CRKL;FGF21
Gastric cancer	6/150	0.175192	0.884719	1.59681	2.78143	SHC2;SHC3;FZD6;SOS1;SOS2;FGF21
MicroRNAs in cancer	10/281	0.169471	0.885338	1.42065	2.52175	RASSF1;CREBBP;DNMT3A;EP300;PRKCA;IRS2;SOS1;SOS2;CDC25A;CRKL
Circadian rhythm	2/30	0.172666	0.886743	2.66134	4.67437	BHLHE41;RORC
Non-alcoholic fatty liver disease (NAFLD)	6/151	0.178888	0.888573	1.58623	2.7299	MLXIPL;NDUFB8;PKLR;LEPR;IRS2;ADIPOR2
Gap junction	4/86	0.169274	0.899825	1.85675	3.29803	ITPR1;PRKCA;SOS1;SOS2
Glycerolipid metabolism	3/61	0.196489	0.93025	1.96329	3.19456	DGKD;TKFC;LIPG
beta-Alanine metabolism	2/32	0.190782	0.932372	2.49501	4.13329	AOC3;AOC2
Cell cycle	5/123	0.196013	0.942731	1.62277	2.64442	CREBBP;TFDP1;ANAPC7;EP300;CDC25A
MAPK signaling pathway	10/294	0.204618	0.953833	1.35783	2.15435	MAP2K3;MAX;GNA12;NF1;PRKCA;SOS1;SOS2;PGF;CRKL;FGF21
Acute myeloid leukemia	3/69	0.249231	0.95591	1.73566	2.41148	STAT5B;SOS1;SOS2
Aldosterone-regulated sodium reabsorption	2/38	0.24628	0.956704	2.10106	2.94419	NEDD4L;PRKCA
B cell receptor signaling pathway	3/72	0.269546	0.960853	1.66334	2.18066	LYN;SOS1;SOS2
Glutathione metabolism	3/64	0.215964	0.962311	1.87126	2.86797	RRM2;GSS;PGD
Bladder cancer	2/41	0.274299	0.966425	1.94732	2.51894	RASSF1;DAPK1
Tyrosine metabolism	2/40	0.264957	0.967253	1.99601	2.65107	AOC3;AOC2
Estrogen signaling pathway	5/134	0.245859	0.967469	1.48956	2.08985	SHC2;SHC3;ITPR1;SOS1;SOS2
Ubiquinone and other terpenoid-quinone biosynthesis	1/11	0.243559	0.971029	3.62911	5.12574	VKORC1L1
Adherens junction	3/72	0.269546	0.972291	1.66334	2.18066	PTPN1;CREBBP;EP300
Signaling pathways regulating pluripotency of stem cells	5/137	0.26	0.972592	1.45694	1.96261	PCGF6;ID2;ESRRB;FZD6;SMAD5
Central carbon metabolism in cancer	3/64	0.215964	0.976674	1.87126	2.86797	PGAM2;SLC2A2;PDHB
Prostate cancer	4/97	0.225685	0.976892	1.64619	2.45055	CREBBP;EP300;SOS1;SOS2
Ferroptosis	2/40	0.264957	0.979049	1.99601	2.65107	TFRC;GSS
Hepatocellular carcinoma	6/171	0.258545	0.97924	1.40071	1.89472	SHC2;SHC3;FZD6;PRKCA;SOS1;SOS2
Amphetamine addiction	3/68	0.242511	0.979743	1.76118	2.49509	GRIN3A;CAMK4;PRKCA
Wnt signaling pathway	6/160	0.213483	0.980081	1.49701	2.31167	CREBBP;ZNRF3;FZD6;EP300;PRKCA;RSPO4
Alcoholism	7/199	0.232955	0.980352	1.40423	2.04583	SHC2;GRIN3A;SHC3;H3F3B;CAMK4;SOS1;SOS2
Choline metabolism in cancer	4/99	0.236428	0.981337	1.61294	2.32603	DGKD;PRKCA;SOS1;SOS2
Relaxin signaling pathway	5/131	0.231929	0.98978	1.52367	2.22658	SHC2;SHC3;PRKCA;SOS1;SOS2
Melanogenesis	4/100	0.241845	0.990256	1.59681	2.2666	CREBBP;FZD6;EP300;PRKCA
Glycerophospholipid metabolism	4/97	0.225685	0.99105	1.64619	2.45055	PGS1;DGKD;GPD2;GPD1
TNF signaling pathway	4/110	0.297306	1	1.45164	1.76083	MAP2K3;JAG1;BCL3;TNFRSF1B
Thiamine metabolism	1/15	0.316597	1	2.66134	3.06088	AK2
Glutamatergic synapse	4/114	0.319942	1	1.40071	1.59627	GRIN3A;ITPR1;PRKCA;GLUL
Ribosome biogenesis in eukaryotes	4/115	0.325624	1	1.38853	1.55794	NOP56;NOB1;GTPBP4;WDR43
ABC transporters	2/48	0.339234	1	1.66334	1.79818	ABCA1;ABCC9
Sphingolipid metabolism	2/48	0.339234	1	1.66334	1.79818	ARSA;SGPP1
RNA degradation	3/83	0.345025	1	1.4429	1.53544	ENO1;TOB2;TENT4B
Nitrogen metabolism	1/17	0.350433	1	2.34824	2.46234	GLUL
Selenocompound metabolism	1/17	0.350433	1	2.34824	2.46234	KYAT3
PPAR signaling pathway	3/85	0.358751	1	1.40895	1.44435	FABP5;UBC;ME1
Insulin secretion	3/86	0.3656	1	1.39256	1.40122	SLC2A2;PRKCA;CCK
Pantothenate and CoA biosynthesis	1/18	0.366718	1	2.21779	2.2248	PANK3
Hippo signaling pathway	5/159	0.367744	1	1.25535	1.25581	RASSF1;ID2;FZD6;PPP2R2A;TRP53BP2
Fc gamma R-mediated phagocytosis	3/87	0.372436	1	1.37656	1.35961	LYN;PRKCA;CRKL
Th1 and Th2 cell differentiation	3/87	0.372436	1	1.37656	1.35961	JAG2;STAT5B;JAG1
Amyotrophic lateral sclerosis (ALS)	2/52	0.375579	1	1.53539	1.50359	MAP2K3;TNFRSF1B
Sphingolipid signaling pathway	4/124	0.376894	1	1.28775	1.25657	GNA12;PPP2R2A;PRKCA;SGPP1
Arginine biosynthesis	1/19	0.382596	1	2.10106	2.01865	GLUL
Steroid biosynthesis	1/19	0.382596	1	2.10106	2.01865	CYP27B1
GABAergic synapse	3/90	0.392853	1	1.33067	1.24327	SLC12A5;PRKCA;GLUL
Progesterone-mediated oocyte maturation	3/90	0.392853	1	1.33067	1.24327	ANAPC7;CPEB2;CDC25A
Inflammatory mediator regulation of TRP channels	4/127	0.393942	1	1.25733	1.17127	MAP2K3;ITPR1;PRKCA;TRPV1
Proteoglycans in cancer	6/203	0.39921	1	1.17991	1.08347	FZD6;ITPR1;PRKCA;SOS1;CBL;SOS2
Influenza A	5/168	0.412463	1	1.1881	1.05219	MAP2K3;CREBBP;EP300;PRKCA;KPNA1
Endometrial cancer	2/58	0.428451	1	1.37656	1.16674	SOS1;SOS2
Pyrimidine metabolism	2/58	0.428451	1	1.37656	1.16674	RRM2;UMPS
VEGF signaling pathway	2/58	0.428451	1	1.37656	1.16674	SHC2;PRKCA
cGMP-PKG signaling pathway	5/172	0.432213	1	1.16047	0.973446	GNA12;ITPR1;IRS2;GATA4;MEF2D
Mannose type O-glycan biosynthesis	1/23	0.442233	1	1.73566	1.41616	POMGNT2
Terpenoid backbone biosynthesis	1/23	0.442233	1	1.73566	1.41616	FNTA
Purine metabolism	4/136	0.444539	1	1.17412	0.951881	RRM2;PKLR;AK2;PDE4B
Apelin signaling pathway	4/138	0.455622	1	1.15711	0.909592	JAG1;CAMK4;ITPR1;MEF2D
Vitamin digestion and absorption	1/24	0.456221	1	1.66334	1.30535	SLC19A1
Human cytomegalovirus infection	7/255	0.456877	1	1.09585	0.858422	GNA12;ITPR1;PRKCA;SOS1;SOS2;BCAR1;CRKL
Mitophagy	2/63	0.470657	1	1.26731	0.955076	FUNDC1;ULK1
Aldosterone synthesis and secretion	3/102	0.472372	1	1.17412	0.880577	CAMK4;ITPR1;PRKCA
Transcriptional misregulation in cancer	5/183	0.48567	1	1.09071	0.787743	CCNT1;H3F3B;LDB1;MAX;ID2
Pancreatic secretion	3/105	0.491532	1	1.14058	0.81007	ITPR1;PRKCA;CCK
Butanoate metabolism	1/27	0.496119	1	1.47852	1.03636	AACS
Mucin type O-glycan biosynthesis	1/28	0.508758	1	1.42572	0.963476	GALNT16
RNA polymerase	1/28	0.508758	1	1.42572	0.963476	POLR1D
RIG-I-like receptor signaling pathway	2/68	0.510939	1	1.17412	0.788428	DDX3X;TKFC
Viral carcinogenesis	6/229	0.513369	1	1.04594	0.697393	LYN;STAT5B;CREBBP;DDX3X;UBR4;EP300
Fatty acid elongation	1/29	0.521081	1	1.37656	0.897308	ELOVL6
Thermogenesis	6/231	0.521855	1	1.03689	0.674356	MAP2K3;COX19;NDUFB8;SOS1;SOS2;FGF21
Huntington disease	5/192	0.528051	1	1.03959	0.663842	CREBBP;NDUFB8;ITPR1;EP300;TAF4
p53 signaling pathway	2/71	0.534125	1	1.12451	0.705211	RRM2;RCHY1
PI3K-Akt signaling pathway	9/357	0.539491	1	1.00639	0.621073	G6PC;LPAR2;PPP2R2A;PRKCA;EIF4E2;SOS1;SOS2;PGF;FGF21
Cholinergic synapse	3/113	0.540857	1	1.05983	0.651371	CAMK4;ITPR1;PRKCA
Oxytocin signaling pathway	4/154	0.541105	1	1.03689	0.636796	RCAN1;CAMK4;ITPR1;PRKCA
Glyoxylate and dicarboxylate metabolism	1/31	0.544809	1	1.28775	0.782074	GLUL
Propanoate metabolism	1/31	0.544809	1	1.28775	0.782074	ACACA
Inositol phosphate metabolism	2/73	0.549158	1	1.0937	0.655532	PIKFYVE;PI4KA
Thyroid hormone synthesis	2/73	0.549158	1	1.0937	0.655532	ITPR1;PRKCA
Leukocyte transendothelial migration	3/115	0.552752	1	1.0414	0.617386	PRKCA;ARHGAP5;BCAR1
Biosynthesis of unsaturated fatty acids	1/32	0.556229	1	1.2475	0.731755	ELOVL6
Galactose metabolism	1/32	0.556229	1	1.2475	0.731755	G6PC
Gastric acid secretion	2/74	0.556546	1	1.07892	0.632255	ITPR1;PRKCA
Oocyte meiosis	3/116	0.558631	1	1.03242	0.601142	ANAPC7;ITPR1;CPEB2
Salivary secretion	2/78	0.585231	1	1.02359	0.548388	ITPR1;PRKCA
Nicotinate and nicotinamide metabolism	1/36	0.599121	1	1.10889	0.568077	NMNAT3
Alanine, aspartate and glutamate metabolism	1/37	0.609181	1	1.07892	0.534757	GLUL
cAMP signaling pathway	5/211	0.611908	1	0.945975	0.464637	CREBBP;GRIN3A;CAMK4;PDE4B;EP300
African trypanosomiasis	1/39	0.628552	1	1.02359	0.475293	PRKCA
Kaposi sarcoma-associated herpesvirus infection	5/216	0.632487	1	0.924078	0.423315	LYN;RCAN1;CREBBP;ITPR1;EP300
Fat digestion and absorption	1/40	0.637875	1	0.998004	0.448716	ABCA1
Nicotine addiction	1/40	0.637875	1	0.998004	0.448716	GRIN3A
Colorectal cancer	2/88	0.650852	1	0.907276	0.38965	SOS1;SOS2
Dopaminergic synapse	3/135	0.661034	1	0.887115	0.367221	ITPR1;PPP2R2A;PRKCA
Basal transcription factors	1/43	0.664465	1	0.928376	0.379495	TAF4
Intestinal immune network for IgA production	1/43	0.664465	1	0.928376	0.379495	IL15RA
Hedgehog signaling pathway	1/44	0.672889	1	0.907276	0.359441	CSNK1G3
Morphine addiction	2/92	0.674692	1	0.86783	0.34149	PDE4B;PRKCA
Glycosphingolipid biosynthesis	1/45	0.681101	1	0.887115	0.340692	ST6GALNAC4
Human papillomavirus infection	8/360	0.683329	1	0.887115	0.337795	CREBBP;JAG1;FZD6;UBR4;EP300;PPP2R2A;SOS1;SOS2
Cellular senescence	4/185	0.684402	1	0.863139	0.327311	MAP2K3;ITPR1;GATA4;CDC25A
Vascular smooth muscle contraction	3/140	0.684937	1	0.855432	0.323719	GNA12;ITPR1;PRKCA
Cocaine addiction	1/48	0.704523	1	0.83167	0.291279	GRIN3A
Tryptophan metabolism	1/48	0.704523	1	0.83167	0.291279	KYAT3
Amino sugar and nucleotide sugar metabolism	1/49	0.711943	1	0.814697	0.2768	GPI1
Circadian entrainment	2/99	0.71321	1	0.806468	0.272569	ITPR1;PRKCA
Human immunodeficiency virus 1 infection	5/238	0.714768	1	0.838659	0.281619	MAP2K3;ITPR1;PRKCA;TNFRSF1B;CRKL
AGE-RAGE signaling pathway in diabetic complications	2/101	0.72349	1	0.790498	0.255859	STAT5B;PRKCA
T cell receptor signaling pathway	2/101	0.72349	1	0.790498	0.255859	SOS1;SOS2
Th17 cell differentiation	2/102	0.728513	1	0.782748	0.247936	STAT5B;RORC
Retrograde endocannabinoid signaling	3/150	0.72892	1	0.798403	0.252448	NDUFB8;ITPR1;PRKCA
Human T-cell leukemia virus 1 infection	5/245	0.738029	1	0.814697	0.247482	IL15RA;STAT5B;CREBBP;ANAPC7;EP300
Glycosaminoglycan biosynthesis	1/53	0.739807	1	0.753211	0.226992	NDST1
Endocrine and other factor-regulated calcium reabsorption	1/55	0.752713	1	0.725821	0.206185	PRKCA
Regulation of lipolysis in adipocytes	1/56	0.758925	1	0.71286	0.196644	IRS2
Valine, leucine and isoleucine degradation	1/56	0.758925	1	0.71286	0.196644	AACS
Hepatitis C	3/160	0.767943	1	0.748503	0.197635	PPP2R2A;SOS1;SOS2
Neuroactive ligand-receptor interaction	7/348	0.772058	1	0.802992	0.20773	GHRHR;GRIN3A;GALR2;LEPR;LPAR2;CCK;TRPV1
C-type lectin receptor signaling pathway	2/112	0.774598	1	0.71286	0.182072	BCL3;ITPR1
Inflammatory bowel disease (IBD)	1/59	0.776641	1	0.676613	0.171032	RORC
Lysine degradation	1/59	0.776641	1	0.676613	0.171032	ASH1L
Drug metabolism	2/114	0.782952	1	0.700354	0.171365	RRM2;UMPS
Cytosolic DNA-sensing pathway	1/61	0.787723	1	0.654429	0.156152	POLR1D
Tight junction	3/167	0.792444	1	0.717129	0.166828	NEDD4L;PPP2R2A;GATA4
Basal cell carcinoma	1/63	0.798257	1	0.633653	0.142778	FZD6
Endocytosis	5/269	0.807181	1	0.74201	0.158944	TFRC;NEDD4L;VPS37B;CBL;GIT1
Alzheimer disease	3/175	0.817772	1	0.684346	0.137671	NDUFB8;ITPR1;GAPDH
Necroptosis	3/176	0.820746	1	0.680457	0.134418	STAT5B;PYGL;GLUL
Lysosome	2/124	0.82076	1	0.643874	0.127181	ARSA;LAMP3
Platelet activation	2/125	0.824197	1	0.638723	0.123494	LYN;ITPR1
Tuberculosis	3/178	0.826571	1	0.672812	0.12815	CYP27B1;CREBBP;EP300
Cortisol synthesis and secretion	1/69	0.82683	1	0.578553	0.110015	ITPR1
Axon guidance	3/180	0.832233	1	0.665336	0.122184	SEMA3C;FES;PRKCA
Melanoma	1/72	0.839564	1	0.554447	0.0969577	FGF21
Serotonergic synapse	2/132	0.846641	1	0.604851	0.100695	ITPR1;PRKCA
Oxidative phosphorylation	2/134	0.852558	1	0.595823	0.0950421	NDUFB8;ATP12A
Renin secretion	1/76	0.8551	1	0.525265	0.0822232	ITPR1
Calcium signaling pathway	3/189	0.855785	1	0.633653	0.0986826	CAMK4;ITPR1;PRKCA
Cytokine-cytokine receptor interaction	5/292	0.859057	1	0.683564	0.103847	IL15RA;TNFRSF19;LEPR;IL20RB;TNFRSF1B
Measles	2/144	0.879136	1	0.554447	0.0714214	STAT5B;RCHY1
Adrenergic signaling in cardiomyocytes	2/148	0.888473	1	0.539462	0.0637919	PPP2R2A;PRKCA
NOD-like receptor signaling pathway	3/205	0.890582	1	0.584197	0.0676969	DHX33;ITPR1;TXNIP
Complement and coagulation cascades	1/88	0.893264	1	0.453638	0.0512034	F7
Antigen processing and presentation	1/90	0.898568	1	0.443557	0.0474398	IFI30
Small cell lung cancer	1/92	0.903608	1	0.433915	0.0439813	MAX
Chemical carcinogenesis	1/94	0.908399	1	0.424683	0.0408	KYAT3
Hematopoietic cell lineage	1/94	0.908399	1	0.424683	0.0408	TFRC
Cushing syndrome	2/159	0.910811	1	0.50214	0.04691	FZD6;ITPR1
Toll-like receptor signaling pathway	1/99	0.919361	1	0.403234	0.0339024	MAP2K3
NF-kappa B signaling pathway	1/102	0.925299	1	0.391374	0.0303855	LYN
Chagas disease (American trypanosomiasis)	1/103	0.92718	1	0.387574	0.0293035	PPP2R2A
Amoebiasis	1/106	0.932544	1	0.376605	0.0263019	PRKCA
Toxoplasmosis	1/108	0.935898	1	0.369631	0.0244874	MAP2K3
Phagosome	2/180	0.942297	1	0.443557	0.0263629	PIKFYVE;TFRC
Osteoclast differentiation	1/128	0.961523	1	0.311876	0.0122372	CAMK4
Herpes simplex virus 1 infection	6/433	0.962172	1	0.553166	0.0213314	ZFP825;ZFP354B;ZFP617;ZFP958;ZFP189;SRPK1
Apoptosis	1/141	0.972394	1	0.283122	0.00792586	ITPR1
Systemic lupus erythematosus	1/143	0.973769	1	0.279162	0.00742047	H3F3B
Parkinson disease	1/144	0.974431	1	0.277223	0.00718061	NDUFB8
Epstein-Barr virus infection	2/229	0.979838	1	0.348648	0.00710124	LYN;MAP2K3
Ribosome	1/170	0.986847	1	0.234824	0.00310904	RPS12

## Sheet: KEGG_hepKO_down
KEGG enriched pathway in WT and HepKO hepatocytes challenged with high sugar compared to unchallenged cells.
Term	Overlap	P-value	Adjusted P-value	Odds Ratio	Combined Score	Genes
PPAR signaling pathway	6/85	0.000260052	0.0787957	6.78733	56.0269	CPT1A;CPT2;ACOX2;GK;PCK1;CYP7A1
Primary bile acid biosynthesis	3/16	0.000561825	0.0851166	18.0288	134.934	ACOX2;CYP7B1;CYP7A1
Glutathione metabolism	4/64	0.00443744	0.448181	6.00962	32.5582	GGT6;ANPEP;GSTP1;IDH2
Autophagy	5/130	0.0116463	0.588136	3.69822	16.4673	RAB7;MTMR14;WIPI1;MTMR4;MAPK3
Fatty acid degradation	3/50	0.0151834	0.657225	5.76923	24.159	CPT1A;CPT2;ECI2
Peroxisome	4/84	0.011481	0.695751	4.57875	20.4536	ACOX2;ECI2;IDH2;XDH
Steroid hormone biosynthesis	3/89	0.0657721	0.711748	3.24114	8.82096	CYP3A13;CYP7B1;CYP7A1
Tyrosine metabolism	2/40	0.0648847	0.728151	4.80769	13.1497	FAHD1;TAT
Lysosome	5/124	0.00962583	0.729156	3.87717	18.0029	CTSO;GNPTAB;SLC17A5;NAGA;SGSH
beta-Alanine metabolism	2/32	0.04353	0.732755	6.00962	18.836	ABAT;UPB1
Proteoglycans in cancer	6/203	0.0196749	0.745188	2.84199	11.1645	FZD5;SMO;PTPN6;ANK3;VAV2;MAPK3
Complement and coagulation cascades	3/88	0.0640256	0.746145	3.27797	9.00941	PROS1;MASP1;MBL2
Gastric cancer	4/150	0.0716718	0.748846	2.5641	6.7581	FRAT2;FZD5;ABCB1A;MAPK3
Endocytosis	6/269	0.0626047	0.758769	2.1447	5.94277	RAB7;ACAP2;PSD3;FGFR4;PRKCZ;SPG20
Axon guidance	5/180	0.0402178	0.761624	2.67094	8.58292	CXCL12;SMO;PRKCZ;EPHB4;MAPK3
Glycerophospholipid metabolism	3/97	0.0805108	0.762336	2.97383	7.49216	LPGAT1;ETNK2;LCLAT1
Caffeine metabolism	1/6	0.0608071	0.767689	16.0256	44.8726	XDH
Citrate cycle (TCA cycle)	2/32	0.04353	0.775858	6.00962	18.836	IDH2;PCK1
Phenylalanine, tyrosine and tryptophan biosynthesis	1/8	0.0802469	0.784349	12.0192	30.3203	TAT
Apoptosis	4/141	0.059865	0.788657	2.72777	7.68048	CTSO;CASP7;BBC3;MAPK3
Insulin signaling pathway	4/139	0.0573939	0.790471	2.76702	7.90763	MKNK2;PCK1;PRKCZ;MAPK3
B cell receptor signaling pathway	3/72	0.0391793	0.791422	4.00641	12.9792	PTPN6;VAV2;MAPK3
Type II diabetes mellitus	2/48	0.0889746	0.792921	4.00641	9.69313	PRKCZ;MAPK3
Glycosphingolipid biosynthesis	2/45	0.0796584	0.80455	4.2735	10.812	B3GALT1;NAGA
T cell receptor signaling pathway	3/101	0.0883708	0.811405	2.85605	6.9294	PTPN6;VAV2;MAPK3
Alanine, aspartate and glutamate metabolism	2/37	0.0565229	0.815545	5.19751	14.933	GPT;ABAT
Chemokine signaling pathway	5/197	0.0552875	0.837606	2.44045	7.06562	CXCL12;PTK2B;PRKCZ;VAV2;MAPK3
Adherens junction	3/72	0.0391793	0.847952	4.00641	12.9792	PTPN6;NECTIN3;MAPK3
Purine metabolism	4/136	0.0537926	0.857851	2.82805	8.26532	PRPS2;GDA;NUDT2;XDH
Ubiquinone and other terpenoid-quinone biosynthesis	1/11	0.108658	0.866408	8.74126	19.4016	TAT
Drug metabolism	3/114	0.115979	0.878538	2.53036	5.45129	GSTP1;UPB1;XDH
Natural killer cell mediated cytotoxicity	4/118	0.0348714	0.880502	3.25945	10.939	PTK2B;PTPN6;VAV2;MAPK3
p53 signaling pathway	3/71	0.0378276	0.881674	4.06284	13.3046	SESN3;SHISA5;BBC3
Taurine and hypotaurine metabolism	1/11	0.108658	0.889824	8.74126	19.4016	GGT6
Valine, leucine and isoleucine degradation	2/56	0.115228	0.89523	3.43407	7.42049	IVD;ABAT
Insulin resistance	3/110	0.107165	0.901974	2.62238	5.85678	CPT1A;PCK1;PRKCZ
Pyrimidine metabolism	2/58	0.122069	0.902119	3.31565	6.97337	NUDT2;UPB1
Hepatocellular carcinoma	5/171	0.0333865	0.919645	2.81152	9.55804	FRAT2;FZD5;GSTP1;SMARCA2;MAPK3
Pathways in cancer	9/535	0.107143	0.927551	1.61754	3.61293	CASP7;FRAT2;CXCL12;FZD5;SMO;GSTP1;FGFR4;BBC3;MAPK3
Platelet activation	3/125	0.141524	0.952932	2.30769	4.51219	STIM1;PRKCZ;MAPK3
Glycerolipid metabolism	2/61	0.13251	0.955964	3.15259	6.37168	GK;LCLAT1
Basal cell carcinoma	2/63	0.13958	0.961197	3.0525	6.01074	SMO;FZD5
Leukocyte transendothelial migration	4/115	0.0321672	0.974666	3.34448	11.4943	OCLN;CXCL12;PTK2B;VAV2
Sphingolipid signaling pathway	3/124	0.139128	0.980369	2.3263	4.5883	SPTLC2;PRKCZ;MAPK3
Steroid biosynthesis	1/19	0.180224	0.99287	5.06073	8.67184	CYP2R1
Breast cancer	3/147	0.197334	0.996535	1.96232	3.18457	FRAT2;FZD5;MAPK3
Butanoate metabolism	2/27	0.0318592	1	7.12251	24.5472	ABAT;L2HGDH
Leishmaniasis	2/67	0.153953	1	2.87026	5.37057	PTPN6;MAPK3
Fc epsilon RI signaling pathway	2/68	0.15759	1	2.82805	5.22555	VAV2;MAPK3
Selenocompound metabolism	1/17	0.162888	1	5.65611	10.2641	SCLY
Adipocytokine signaling pathway	2/71	0.168597	1	2.70856	4.8219	CPT1A;PCK1
Signaling pathways regulating pluripotency of stem cells	3/137	0.171293	1	2.10556	3.71501	FZD5;FGFR4;MAPK3
Pantothenate and CoA biosynthesis	1/18	0.171601	1	5.34188	9.41551	UPB1
Bile secretion	2/72	0.172294	1	2.67094	4.69699	ABCB1A;CYP7A1
Inositol phosphate metabolism	2/73	0.176005	1	2.63435	4.57651	MTMR14;MTMR4
Arginine biosynthesis	1/19	0.180224	1	5.06073	8.67184	GPT
Pertussis	2/76	0.187211	1	2.53036	4.23967	CASP7;MAPK3
Regulation of actin cytoskeleton	4/217	0.190314	1	1.77242	2.94058	CXCL12;FGFR4;VAV2;MAPK3
Salmonella infection	2/78	0.194737	1	2.46548	4.0338	RAB7;MAPK3
Glycosaminoglycan degradation	1/21	0.197203	1	4.57875	7.4337	SGSH
Proximal tubule bicarbonate reclamation	1/22	0.205561	1	4.37063	6.91439	PCK1
Phenylalanine metabolism	1/23	0.213832	1	4.1806	6.44884	TAT
Fc gamma R-mediated phagocytosis	2/87	0.229002	1	2.21043	3.25823	VAV2;MAPK3
Th1 and Th2 cell differentiation	2/87	0.229002	1	2.21043	3.25823	TYK2;MAPK3
Cushing syndrome	3/159	0.229726	1	1.81422	2.66848	FZD5;PBX1;MAPK3
Hippo signaling pathway	3/159	0.229726	1	1.81422	2.66848	FZD5;PRKCZ;BBC3
Hepatitis C	3/160	0.232471	1	1.80288	2.63039	OCLN;TYK2;MAPK3
Colorectal cancer	2/88	0.232839	1	2.18531	3.1849	BBC3;MAPK3
GnRH signaling pathway	2/90	0.240523	1	2.13675	3.04474	PTK2B;MAPK3
Hepatitis B	3/163	0.240741	1	1.7697	2.52011	PTK2B;TYK2;MAPK3
JAK-STAT signaling pathway	3/164	0.243509	1	1.75891	2.48464	PIAS3;PTPN6;TYK2
Mucin type O-glycan biosynthesis	1/28	0.25392	1	3.43407	4.70719	GCNT4
Chemical carcinogenesis	2/94	0.255925	1	2.04583	2.7882	GSTP1;CYP3A13
Staphylococcus aureus infection	2/95	0.259779	1	2.02429	2.72859	MASP1;MBL2
Prostate cancer	2/97	0.267489	1	1.98255	2.61435	GSTP1;MAPK3
Phosphatidylinositol signaling system	2/98	0.271344	1	1.96232	2.55959	MTMR14;MTMR4
Propanoate metabolism	1/31	0.27699	1	3.10174	3.98193	ABAT
Melanogenesis	2/100	0.279052	1	1.92308	2.45453	FZD5;MAPK3
Tuberculosis	3/178	0.282717	1	1.62057	2.04728	RAB7;NFYB;MAPK3
AGE-RAGE signaling pathway in diabetic complications	2/101	0.282904	1	1.90404	2.40412	PRKCZ;MAPK3
Galactose metabolism	1/32	0.284521	1	3.00481	3.77689	MGAM
Pentose phosphate pathway	1/32	0.284521	1	3.00481	3.77689	PRPS2
Glucagon signaling pathway	2/102	0.286755	1	1.88537	2.35507	CPT1A;PCK1
Th17 cell differentiation	2/102	0.286755	1	1.88537	2.35507	TYK2;MAPK3
Starch and sucrose metabolism	1/33	0.291974	1	2.91375	3.5871	MGAM
HIF-1 signaling pathway	2/104	0.294449	1	1.84911	2.26082	MKNK2;MAPK3
Pentose and glucuronate interconversions	1/34	0.299349	1	2.82805	3.41104	DCXR
Prion diseases	1/34	0.299349	1	2.82805	3.41104	MAPK3
Toxoplasmosis	2/108	0.3098	1	1.78063	2.08659	TYK2;MAPK3
Renin-angiotensin system	1/36	0.313872	1	2.67094	3.095	ANPEP
TNF signaling pathway	2/110	0.317451	1	1.74825	2.006	CASP7;MAPK3
Thyroid cancer	1/37	0.321021	1	2.59875	2.95283	MAPK3
Aldosterone-regulated sodium reabsorption	1/38	0.328095	1	2.53036	2.81997	MAPK3
Pyruvate metabolism	1/38	0.328095	1	2.53036	2.81997	PCK1
Bladder cancer	1/41	0.348881	1	2.34522	2.46957	MAPK3
Porphyrin and chlorophyll metabolism	1/41	0.348881	1	2.34522	2.46957	FECH
NOD-like receptor signaling pathway	3/205	0.359353	1	1.40713	1.44013	PANX1;TYK2;MAPK3
Carbohydrate digestion and absorption	1/43	0.362382	1	2.23614	2.2698	MGAM
Intestinal immune network for IgA production	1/43	0.362382	1	2.23614	2.2698	CXCL12
Hedgehog signaling pathway	1/44	0.369028	1	2.18531	2.17851	SMO
Mineral absorption	1/44	0.369028	1	2.18531	2.17851	CLCN2
Rap1 signaling pathway	3/209	0.37067	1	1.3802	1.36977	FGFR4;PRKCZ;MAPK3
AMPK signaling pathway	2/126	0.377765	1	1.52625	1.48578	CPT1A;PCK1
Proteasome	1/46	0.382112	1	2.0903	2.01095	PSMB9
Osteoclast differentiation	2/128	0.385161	1	1.5024	1.43343	TYK2;MAPK3
ABC transporters	1/48	0.394927	1	2.00321	1.86108	ABCB1A
Sphingolipid metabolism	1/48	0.394927	1	2.00321	1.86108	SPTLC2
Relaxin signaling pathway	2/131	0.396183	1	1.468	1.35919	PRKCZ;MAPK3
FoxO signaling pathway	2/132	0.399837	1	1.45688	1.33552	PCK1;MAPK3
Cholesterol metabolism	1/49	0.401235	1	1.96232	1.79201	CYP7A1
Estrogen signaling pathway	2/134	0.407114	1	1.43513	1.2897	FKBP5;MAPK3
Cysteine and methionine metabolism	1/50	0.407478	1	1.92308	1.72648	TAT
Linoleic acid metabolism	1/50	0.407478	1	1.92308	1.72648	CYP3A13
Fanconi anemia pathway	1/51	0.413655	1	1.88537	1.66426	POLI
Thermogenesis	3/231	0.432063	1	1.24875	1.04793	CPT1A;CPT2;SMARCA2
Fluid shear stress and atherosclerosis	2/143	0.439314	1	1.34481	1.10616	GSTP1;PRKCZ
Measles	2/144	0.442834	1	1.33547	1.08782	TYK2;BBC3
Endometrial cancer	1/58	0.455141	1	1.65782	1.30495	MAPK3
Legionellosis	1/58	0.455141	1	1.65782	1.30495	CASP7
VEGF signaling pathway	1/58	0.455141	1	1.65782	1.30495	MAPK3
Phospholipase D signaling pathway	2/149	0.460247	1	1.29066	1.00154	PTK2B;MAPK3
Long-term depression	1/61	0.472013	1	1.57629	1.1834	MAPK3
mTOR signaling pathway	2/154	0.477342	1	1.24875	0.923479	FZD5;MAPK3
Mitophagy	1/63	0.482972	1	1.52625	1.1108	RAB7
Central carbon metabolism in cancer	1/64	0.488366	1	1.5024	1.07676	MAPK3
Human cytomegalovirus infection	3/255	0.496415	1	1.13122	0.792242	CXCL12;PTK2B;MAPK3
Wnt signaling pathway	2/160	0.497417	1	1.20192	0.839335	FRAT2;FZD5
Metabolism of xenobiotics by cytochrome P450	1/66	0.498987	1	1.45688	1.01279	GSTP1
Non-small cell lung cancer	1/66	0.498987	1	1.45688	1.01279	MAPK3
Glycolysis / Gluconeogenesis	1/67	0.504214	1	1.43513	0.982712	PCK1
Long-term potentiation	1/67	0.504214	1	1.43513	0.982712	MAPK3
Renal cell carcinoma	1/68	0.509388	1	1.41403	0.953826	MAPK3
Acute myeloid leukemia	1/69	0.514508	1	1.39353	0.926066	MAPK3
Cortisol synthesis and secretion	1/69	0.514508	1	1.39353	0.926066	PBX1
Human papillomavirus infection	4/360	0.517182	1	1.06838	0.704444	FZD5;TYK2;PRKCZ;MAPK3
Tight junction	2/167	0.52021	1	1.15154	0.75256	OCLN;PRKCZ
Influenza A	2/168	0.52341	1	1.14469	0.741061	TYK2;MAPK3
Melanoma	1/72	0.52955	1	1.33547	0.848995	MAPK3
Prolactin signaling pathway	1/72	0.52955	1	1.33547	0.848995	MAPK3
Cell adhesion molecules (CAMs)	2/170	0.529766	1	1.13122	0.718687	OCLN;NECTIN3
Thyroid hormone synthesis	1/73	0.53446	1	1.31718	0.825208	PDIA4
Glioma	1/75	0.544129	1	1.28205	0.780217	MAPK3
Pancreatic cancer	1/75	0.544129	1	1.28205	0.780217	MAPK3
Alzheimer disease	2/175	0.545406	1	1.0989	0.666182	CASP7;MAPK3
Chronic myeloid leukemia	1/76	0.548888	1	1.26518	0.758934	MAPK3
Phagosome	2/180	0.560681	1	1.06838	0.618167	RAB7;MBL2
ErbB signaling pathway	1/84	0.585221	1	1.14469	0.613285	MAPK3
Rheumatoid arthritis	1/84	0.585221	1	1.14469	0.613285	CXCL12
Calcium signaling pathway	2/189	0.587247	1	1.0175	0.541626	STIM1;PTK2B
MAPK signaling pathway	3/294	0.592517	1	0.981162	0.513517	MKNK2;FGFR4;MAPK3
Gap junction	1/86	0.59384	1	1.11807	0.582676	MAPK3
Arachidonic acid metabolism	1/89	0.606435	1	1.08038	0.540361	PTGES2
Antigen processing and presentation	1/90	0.610546	1	1.06838	0.527138	NFYB
GABAergic synapse	1/90	0.610546	1	1.06838	0.527138	ABAT
Progesterone-mediated oocyte maturation	1/90	0.610546	1	1.06838	0.527138	MAPK3
IL-17 signaling pathway	1/91	0.614615	1	1.05664	0.514328	MAPK3
Retinol metabolism	1/91	0.614615	1	1.05664	0.514328	CYP3A13
TGF-beta signaling pathway	1/91	0.614615	1	1.05664	0.514328	MAPK3
Focal adhesion	2/199	0.615355	1	0.96637	0.469227	VAV2;MAPK3
Hematopoietic cell lineage	1/94	0.626569	1	1.02291	0.478209	ANPEP
Choline metabolism in cancer	1/99	0.645677	1	0.971251	0.424879	MAPK3
Circadian entrainment	1/99	0.645677	1	0.971251	0.424879	MAPK3
Toll-like receptor signaling pathway	1/99	0.645677	1	0.971251	0.424879	MAPK3
cAMP signaling pathway	2/211	0.64713	1	0.911411	0.396654	VAV2;MAPK3
Longevity regulating pathway	1/102	0.656672	1	0.942685	0.396466	SESN3
NF-kappa B signaling pathway	1/102	0.656672	1	0.942685	0.396466	CXCL12
Kaposi sarcoma-associated herpesvirus infection	2/216	0.659746	1	0.890313	0.370282	TYK2;MAPK3
Chagas disease (American trypanosomiasis)	1/103	0.660261	1	0.933532	0.387529	MAPK3
Amoebiasis	1/106	0.670805	1	0.907112	0.362189	RAB7
Parathyroid hormone synthesis, secretion and action	1/107	0.674247	1	0.898634	0.354205	MAPK3
Viral carcinogenesis	2/229	0.690862	1	0.839772	0.31056	HPN;MAPK3
C-type lectin receptor signaling pathway	1/112	0.690926	1	0.858516	0.317413	MAPK3
Cholinergic synapse	1/113	0.694159	1	0.850919	0.310632	MAPK3
Glutamatergic synapse	1/114	0.697357	1	0.843455	0.304029	MAPK3
Ras signaling pathway	2/233	0.699955	1	0.825355	0.294436	FGFR4;MAPK3
Thyroid hormone signaling pathway	1/115	0.700523	1	0.83612	0.297599	MAPK3
Oocyte meiosis	1/116	0.703655	1	0.828912	0.291335	MAPK3
Human immunodeficiency virus 1 infection	2/238	0.711011	1	0.808016	0.275588	PTK2B;MAPK3
Neurotrophin signaling pathway	1/121	0.718836	1	0.79466	0.262335	MAPK3
PI3K-Akt signaling pathway	3/357	0.720817	1	0.808016	0.26452	PCK1;FGFR4;MAPK3
Human T-cell leukemia virus 1 infection	2/245	0.725916	1	0.784929	0.251429	NFYB;MAPK3
Serotonergic synapse	1/132	0.749563	1	0.728438	0.209983	MAPK3
Apelin signaling pathway	1/138	0.76489	1	0.696767	0.18675	MAPK3
Ubiquitin mediated proteolysis	1/138	0.76489	1	0.696767	0.18675	PIAS3
Vascular smooth muscle contraction	1/140	0.769788	1	0.686813	0.179698	MAPK3
Adrenergic signaling in cardiomyocytes	1/148	0.788388	1	0.649688	0.154473	MAPK3
Retrograde endocannabinoid signaling	1/150	0.792799	1	0.641026	0.148837	MAPK3
Non-alcoholic fatty liver disease (NAFLD)	1/151	0.79497	1	0.63678	0.14611	CASP7
Oxytocin signaling pathway	1/154	0.801349	1	0.624376	0.138274	MAPK3
Protein processing in endoplasmic reticulum	1/163	0.819323	1	0.589901	0.117553	PDIA4
cGMP-PKG signaling pathway	1/172	0.835679	1	0.559034	0.100353	MAPK3
Necroptosis	1/176	0.842466	1	0.546329	0.0936524	TYK2
Transcriptional misregulation in cancer	1/183	0.85368	1	0.525431	0.0831224	PBX1
Cellular senescence	1/185	0.856736	1	0.519751	0.0803668	MAPK3
Huntington disease	1/192	0.866938	1	0.500801	0.0715081	BBC3
Alcoholism	1/199	0.876418	1	0.483185	0.0637382	MAPK3
Epstein-Barr virus infection	1/229	0.909994	1	0.419886	0.0396025	TYK2
MicroRNAs in cancer	1/281	0.948105	1	0.342185	0.0182349	ABCB1A
Cytokine-cytokine receptor interaction	1/292	0.95382	1	0.329294	0.0155691	CXCL12
Herpes simplex virus 1 infection	1/433	0.989708	1	0.222064	0.00229724	TYK2

## Sheet: KEGG_hepKO_up
KEGG enriched pathway in WT and HepKO hepatocytes challenged with high sugar compared to unchallenged cells.
Term	Overlap	P-value	Adjusted P-value	Odds Ratio	Combined Score	Genes
Glycolysis / Gluconeogenesis	12/67	7.73036e-09	2.3423e-06	8.95522	167.267	GPI1;PFKL;G6PC;PKM;PKLR;ENO1B;PGAM2;ENO1;DLAT;ALDOB;PDHB;GAPDH
Insulin signaling pathway	14/139	7.93214e-07	0.000120172	5.03597	70.7412	G6PC;SHC3;PKLR;IRS2;SLC2A4;PYGL;PRKAB1;ACACA;MTOR;CRKL;PPP1R3C;FASN;EIF4E2;SOS1
AMPK signaling pathway	13/126	1.49358e-06	0.000150852	5.15873	69.2009	G6PC;PFKFB3;IRS2;SLC2A4;PRKAB1;ADIPOR2;ACACA;MTOR;PFKL;FASN;LEPR;ULK1;SCD1
Glucagon signaling pathway	10/102	3.79544e-05	0.00287505	4.90196	49.8977	CREBBP;PFKL;G6PC;PKM;PGAM2;SLC2A2;PYGL;PDHB;PRKAB1;ACACA
HIF-1 signaling pathway	10/104	4.48912e-05	0.00272041	4.80769	48.1311	CREBBP;PFKL;PFKFB3;ENO1B;ENO1;PDHB;EIF4E2;GAPDH;MTOR;PDK1
Adipocytokine signaling pathway	8/71	8.45165e-05	0.00426808	5.6338	52.837	G6PC;LEPR;IRS2;SLC2A4;TNFRSF1B;PRKAB1;ADIPOR2;MTOR
Pyruvate metabolism	6/38	9.89937e-05	0.00428501	7.89474	72.7931	PKM;PKLR;ME1;PDHB;DLAT;ACACA
Central carbon metabolism in cancer	7/64	0.000282831	0.0107122	5.46875	44.6833	PFKL;PKM;PGAM2;SLC2A2;PDHB;MTOR;PDK1
Insulin resistance	9/110	0.000366906	0.0123525	4.09091	32.3607	MLXIPL;G6PC;PPP1R3C;SLC2A2;IRS2;SLC2A4;PYGL;PRKAB1;MTOR
Type II diabetes mellitus	6/48	0.000371902	0.0112686	6.25	49.3555	PKM;PKLR;SLC2A2;IRS2;SLC2A4;MTOR
Citrate cycle (TCA cycle)	5/32	0.000402686	0.0110922	7.8125	61.0731	CS;ACLY;PDHB;DLAT;CSL
Pentose phosphate pathway	5/32	0.000402686	0.0101678	7.8125	61.0731	GPI1;RPIA;PFKL;ALDOB;PGD
Fructose and mannose metabolism	5/35	0.000618022	0.0144047	7.14286	52.7785	PFKL;PFKFB3;TKFC;ALDOB;KHK
RNA transport	10/167	0.00200582	0.0434117	2.99401	18.5979	UPF2;PRMT5;NUP205;XPOT;NUP50;ACIN1;NUP54;RANGAP1;EIF4E2;RPP14
Starch and sucrose metabolism	4/33	0.00407717	0.0823589	6.06061	33.3476	GPI1;G6PC;GBE1;PYGL
Autophagy	8/130	0.00466682	0.0883779	3.07692	16.5147	ERN1;UVRAG;DAPK1;ATG4C;IRS2;ULK1;NRBF2;MTOR
ErbB signaling pathway	6/84	0.00675913	0.120471	3.57143	17.8459	STAT5B;SHC3;ABL2;SOS1;MTOR;CRKL
Glycine, serine and threonine metabolism	4/40	0.00816244	0.137401	5	24.0411	AOC3;AOC2;THA1;PGAM2
Non-alcoholic fatty liver disease (NAFLD)	8/151	0.0111506	0.177822	2.64901	11.9106	ERN1;MLXIPL;NDUFB8;PKLR;LEPR;IRS2;PRKAB1;ADIPOR2
Maturity onset diabetes of the young	3/27	0.0162723	0.246526	5.55556	22.8794	PKLR;SLC2A2;BHLHA15
Longevity regulating pathway	6/102	0.0166425	0.240127	2.94118	12.0465	IRS2;ULK1;EIF4E2;PRKAB1;ADIPOR2;MTOR
FoxO signaling pathway	7/132	0.0169966	0.23409	2.65152	10.8042	CREBBP;G6PC;IRS2;SLC2A4;FBXO32;SOS1;PRKAB1
Circadian rhythm	3/30	0.0216173	0.284785	5	19.1713	BHLHE40;RORC;PRKAB1
Glyoxylate and dicarboxylate metabolism	3/31	0.0235869	0.297784	4.83871	18.131	CS;GLUL;CSL
Thyroid hormone signaling pathway	6/115	0.0281117	0.340713	2.6087	9.31714	NCOA1;RCAN1;CREBBP;GATA4;MTOR;MED13L
Fatty acid biosynthesis	2/14	0.0309787	0.361021	7.14286	24.8175	FASN;ACACA
Thiamine metabolism	2/15	0.0352799	0.395919	6.66667	22.2963	AK2;AK4
Glycerophospholipid metabolism	5/97	0.0452197	0.489341	2.57732	7.97996	PGS1;DGKD;GPD2;GPD1;ADPRM
Tyrosine metabolism	3/40	0.0454984	0.47538	3.75	11.5878	AOC3;AOC2;COMT
Acute myeloid leukemia	4/69	0.049383	0.498768	2.89855	8.71928	STAT5B;SOS1;MTOR;PPARD
Carbohydrate digestion and absorption	3/43	0.0544275	0.531985	3.48837	10.1543	G6PC;SLC2A2;SLC37A4
Purine metabolism	6/136	0.0558414	0.528748	2.20588	6.3645	PKM;RRM2;PKLR;AK2;AK4;ADPRM
Prolactin signaling pathway	4/72	0.0561457	0.51552	2.77778	7.99946	STAT5B;SHC3;SLC2A2;SOS1
Ubiquitin mediated proteolysis	6/138	0.0591154	0.526823	2.17391	6.1484	DDB1;ANAPC7;NEDD4L;UBA2;RCHY1;UBE2J1
Bacterial invasion of epithelial cells	4/74	0.0609169	0.527366	2.7027	7.56282	SHC3;PXN;BCAR1;CRKL
Chronic myeloid leukemia	4/76	0.0658958	0.554623	2.63158	7.15705	STAT5B;SHC3;SOS1;CRKL
Regulation of actin cytoskeleton	8/217	0.0708976	0.580594	1.84332	4.87838	PIKFYVE;SPATA13;PXN;LPAR2;SOS1;BCAR1;CRKL;FGF21
Breast cancer	6/147	0.0752388	0.59993	2.04082	5.27977	JAG2;NCOA1;SHC3;SOS1;MTOR;FGF21
Phenylalanine metabolism	2/23	0.076621	0.595286	4.34783	11.1691	AOC3;AOC2
Cysteine and methionine metabolism	3/50	0.0781948	0.592325	3	7.64566	GSS;DNMT3A;KYAT3
RNA degradation	4/83	0.0849184	0.627567	2.40964	5.94233	PFKL;ENO1B;ENO1;TOB2
Glycosylphosphatidylinositol (GPI)-anchor biosynthesis	2/25	0.0885465	0.6388	4	9.69691	PIGC;PIGX
Viral carcinogenesis	8/229	0.0900161	0.634299	1.74672	4.20571	LYN;DDB1;STAT5B;CREBBP;DDX3X;PKM;GTF2B;PXN
PPAR signaling pathway	4/85	0.0907955	0.625251	2.35294	5.64505	FABP5;ME1;SCD1;PPARD
Chemokine signaling pathway	7/197	0.101372	0.682571	1.77665	4.06668	LYN;STAT5B;SHC3;PXN;SOS1;BCAR1;CRKL
JAK-STAT signaling pathway	6/164	0.111802	0.736433	1.82927	4.00798	IL15RA;STAT5B;CREBBP;LEPR;SOS1;MTOR
Glycerolipid metabolism	3/61	0.12286	0.792056	2.45902	5.15584	DGKD;TKFC;LIPG
mRNA surveillance pathway	4/96	0.126378	0.797758	2.08333	4.30934	UPF2;CPSF7;CSTF1;ACIN1
Biosynthesis of unsaturated fatty acids	2/32	0.133886	0.827905	3.125	6.28366	ELOVL6;SCD1
Galactose metabolism	2/32	0.133886	0.811347	3.125	6.28366	PFKL;G6PC
beta-Alanine metabolism	2/32	0.133886	0.795438	3.125	6.28366	AOC3;AOC2
Glutathione metabolism	3/64	0.13636	0.794562	2.34375	4.66981	RRM2;GSS;PGD
Non-small cell lung cancer	3/66	0.14563	0.832564	2.27273	4.37883	STAT5B;RASSF1;SOS1
Renal cell carcinoma	3/68	0.155099	0.870279	2.20588	4.11108	CREBBP;SOS1;CRKL
Alanine, aspartate and glutamate metabolism	2/37	0.168781	0.929828	2.7027	4.80853	GLUL;DDO
B cell receptor signaling pathway	3/72	0.174583	0.944618	2.08333	3.63616	LYN;DAPP1;SOS1
Phospholipase D signaling pathway	5/149	0.179	0.951526	1.67785	2.88653	DGKD;SHC3;LPAR2;SOS1;MTOR
Ras signaling pathway	7/233	0.187063	0.97724	1.50215	2.51807	RASSF1;SHC3;ABL2;RASAL1;RAPGEF5;SOS1;FGF21
Glioma	3/75	0.18962	0.973812	2	3.32546	SHC3;SOS1;MTOR
mTOR signaling pathway	5/154	0.196106	0.990337	1.62338	2.64464	ULK1;EIF4E2;SOS1;FNIP2;MTOR
Bladder cancer	2/41	0.197664	0.981838	2.43902	3.95412	RASSF1;DAPK1
Ribosome biogenesis in eukaryotes	4/115	0.198774	0.971427	1.73913	2.80972	NOB1;WDR3;WDR43;UTP14B
Ubiquinone and other terpenoid-quinone biosynthesis	1/11	0.199313	0.958602	4.54545	7.33126	VKORC1L1
MicroRNAs in cancer	8/281	0.202505	0.958734	1.42349	2.2733	RASSF1;CREBBP;DNMT3A;IRS2;SOS1;RECK;MTOR;CRKL
Neurotrophin signaling pathway	4/121	0.223836	1	1.65289	2.47412	SHC3;SOS1;CRKL;ZFP110
Hepatitis B	5/163	0.228219	1	1.53374	2.26603	DDB1;STAT5B;CREBBP;DDX3X;SOS1
Cholesterol metabolism	2/49	0.256778	1	2.04082	2.77458	LIPG;ANGPTL8
Notch signaling pathway	2/49	0.256778	1	2.04082	2.77458	JAG2;CREBBP
cGMP-PKG signaling pathway	5/172	0.261731	1	1.45349	1.94831	IRS2;GATA4;ATP2A1;ATP2B2;MEF2D
Spliceosome	4/132	0.271639	1	1.51515	1.97467	PRPF38B;PPIE;ACIN1;TXNL4A
Pathways in cancer	13/535	0.275634	1	1.21495	1.56569	JAG2;NCOA1;IL15RA;STAT5B;CREBBP;DAPK1;LPAR2;MTOR;CRKL;RASSF1;SOS1;PPARD;FGF21
Nitrogen metabolism	1/17	0.290776	1	2.94118	3.63295	GLUL
Selenocompound metabolism	1/17	0.290776	1	2.94118	3.63295	KYAT3
Prostate cancer	3/97	0.30686	1	1.54639	1.82685	CREBBP;SOS1;MTOR
Thermogenesis	6/231	0.316611	1	1.2987	1.49361	COX19;NDUFB8;SOS1;PRKAB1;MTOR;FGF21
Choline metabolism in cancer	3/99	0.317818	1	1.51515	1.73678	DGKD;SOS1;MTOR
Arginine biosynthesis	1/19	0.318886	1	2.63158	3.00769	GLUL
Steroid biosynthesis	1/19	0.318886	1	2.63158	3.00769	CYP27B1
Pyrimidine metabolism	2/58	0.323524	1	1.72414	1.94566	RRM2;UMPS
Th17 cell differentiation	3/102	0.334262	1	1.47059	1.61151	STAT5B;RORC;MTOR
Gastric cancer	4/150	0.352741	1	1.33333	1.38936	SHC3;SOS1;MTOR;FGF21
Mitophagy	2/63	0.360011	1	1.5873	1.62162	FUNDC1;ULK1
Parathyroid hormone synthesis, secretion and action	3/107	0.361618	1	1.40187	1.42593	SLC34A2;CYP27B1;MEF2D
Focal adhesion	5/199	0.367167	1	1.25628	1.25872	SHC3;PXN;SOS1;BCAR1;CRKL
Fc epsilon RI signaling pathway	2/68	0.39575	1	1.47059	1.36319	LYN;SOS1
RIG-I-like receptor signaling pathway	2/68	0.39575	1	1.47059	1.36319	DDX3X;TKFC
Rap1 signaling pathway	5/209	0.406795	1	1.19617	1.07589	LPAR2;RAPGEF5;BCAR1;CRKL;FGF21
p53 signaling pathway	2/71	0.416752	1	1.40845	1.23277	RRM2;RCHY1
Butanoate metabolism	1/27	0.42064	1	1.85185	1.60366	AACS
RNA polymerase	1/28	0.432242	1	1.78571	1.4978	POLR1D
Fatty acid elongation	1/29	0.443613	1	1.72414	1.40138	ELOVL6
Cell cycle	3/123	0.447439	1	1.21951	0.980751	CREBBP;TFDP1;ANAPC7
Alzheimer disease	4/175	0.464914	1	1.14286	0.875317	ERN1;NDUFB8;ATP2A1;GAPDH
Propanoate metabolism	1/31	0.465679	1	1.6129	1.23268	ACACA
Transcriptional misregulation in cancer	4/183	0.499492	1	1.0929	0.758648	H3F3B;LDB1;MLLT1;BAIAP3
Estrogen signaling pathway	3/134	0.503706	1	1.1194	0.767644	NCOA1;SHC3;SOS1
Renin-angiotensin system	1/36	0.517097	1	1.38889	0.916006	ENPEP
Human immunodeficiency virus 1 infection	5/238	0.518662	1	1.05042	0.689603	DDB1;PXN;TNFRSF1B;MTOR;CRKL
Fc gamma R-mediated phagocytosis	2/87	0.521841	1	1.14943	0.747577	LYN;CRKL
Th1 and Th2 cell differentiation	2/87	0.521841	1	1.14943	0.747577	JAG2;STAT5B
Apelin signaling pathway	3/138	0.523432	1	1.08696	0.70364	PRKAB1;MEF2D;MTOR
Colorectal cancer	2/88	0.52798	1	1.13636	0.725792	SOS1;MTOR
Aldosterone-regulated sodium reabsorption	1/38	0.536255	1	1.31579	0.819929	NEDD4L
GABAergic synapse	2/90	0.540096	1	1.11111	0.684454	PLCL1;GLUL
Progesterone-mediated oocyte maturation	2/90	0.540096	1	1.11111	0.684454	ANAPC7;CPEB2
TGF-beta signaling pathway	2/91	0.546073	1	1.0989	0.664838	CREBBP;TFDP1
Fat digestion and absorption	1/40	0.554654	1	1.25	0.736764	MTTP
Ferroptosis	1/40	0.554654	1	1.25	0.736764	GSS
Nicotine addiction	1/40	0.554654	1	1.25	0.736764	GRIN3A
Alcoholism	4/199	0.565509	1	1.00503	0.572893	GRIN3A;SHC3;H3F3B;SOS1
Human cytomegalovirus infection	5/255	0.579988	1	0.980392	0.534066	PXN;SOS1;MTOR;BCAR1;CRKL
Basal transcription factors	1/43	0.580896	1	1.16279	0.631608	GTF2B
Intestinal immune network for IgA production	1/43	0.580896	1	1.16279	0.631608	IL15RA
Nucleotide excision repair	1/43	0.580896	1	1.16279	0.631608	DDB1
Phosphatidylinositol signaling system	2/98	0.586379	1	1.02041	0.544682	PIKFYVE;DGKD
Hedgehog signaling pathway	1/44	0.589297	1	1.13636	0.600938	CSNK1G3
Mineral absorption	1/44	0.589297	1	1.13636	0.600938	SLC34A2
Glycosphingolipid biosynthesis	1/45	0.597529	1	1.11111	0.57217	ST6GALNAC4
ABC transporters	1/48	0.621251	1	1.04167	0.495855	ABCC9
Cocaine addiction	1/48	0.621251	1	1.04167	0.495855	GRIN3A
Sphingolipid metabolism	1/48	0.621251	1	1.04167	0.495855	B4GALT6
Tryptophan metabolism	1/48	0.621251	1	1.04167	0.495855	KYAT3
Wnt signaling pathway	3/160	0.623624	1	0.9375	0.442694	CREBBP;ZNRF3;PPARD
Pancreatic secretion	2/105	0.623979	1	0.952381	0.44918	ATP2A1;ATP2B2
Amino sugar and nucleotide sugar metabolism	1/49	0.628844	1	1.02041	0.473339	GPI1
Kaposi sarcoma-associated herpesvirus infection	4/216	0.630088	1	0.925926	0.427682	LYN;RCAN1;CREBBP;MTOR
Protein processing in endoplasmic reticulum	3/163	0.636117	1	0.920245	0.416293	ERN1;DERL2;UBE2J1
Fanconi anemia pathway	1/51	0.643578	1	0.980392	0.432071	SLX4
TNF signaling pathway	2/110	0.649182	1	0.909091	0.392765	BCL3;TNFRSF1B
Amyotrophic lateral sclerosis (ALS)	1/52	0.650724	1	0.961538	0.413143	TNFRSF1B
Tight junction	3/167	0.652321	1	0.898204	0.383729	NEDD4L;GATA4;PRKAB1
Hepatocellular carcinoma	3/171	0.668004	1	0.877193	0.353913	SHC3;SOS1;MTOR
Drug metabolism	2/114	0.668367	1	0.877193	0.353437	RRM2;UMPS
Glutamatergic synapse	2/114	0.668367	1	0.877193	0.353437	GRIN3A;GLUL
Leukocyte transendothelial migration	2/115	0.673028	1	0.869565	0.34432	PXN;BCAR1
Oocyte meiosis	2/116	0.677637	1	0.862069	0.335469	ANAPC7;CPEB2
Regulation of lipolysis in adipocytes	1/56	0.67791	1	0.892857	0.34709	IRS2
Valine, leucine and isoleucine degradation	1/56	0.67791	1	0.892857	0.34709	AACS
Natural killer cell mediated cytotoxicity	2/118	0.686695	1	0.847458	0.318529	SHC3;SOS1
Necroptosis	3/176	0.686875	1	0.852273	0.320117	STAT5B;PYGL;GLUL
Endometrial cancer	1/58	0.6907	1	0.862069	0.319008	SOS1
VEGF signaling pathway	1/58	0.6907	1	0.862069	0.319008	PXN
Inflammatory bowel disease (IBD)	1/59	0.696904	1	0.847458	0.306023	RORC
Lysine degradation	1/59	0.696904	1	0.847458	0.306023	PRDM2
Cytokine-cytokine receptor interaction	5/292	0.697477	1	0.856164	0.308464	IL15RA;GDF9;LEPR;TNFRSF25;TNFRSF1B
Axon guidance	3/180	0.701386	1	0.833333	0.295581	EFNB3;SEMA3C;PDK1
Cytosolic DNA-sensing pathway	1/61	0.708942	1	0.819672	0.281952	POLR1D
Long-term depression	1/61	0.708942	1	0.819672	0.281952	LYN
PI3K-Akt signaling pathway	6/357	0.721818	1	0.840336	0.273934	G6PC;LPAR2;EIF4E2;SOS1;MTOR;FGF21
Human T-cell leukemia virus 1 infection	4/245	0.725157	1	0.816327	0.26234	IL15RA;STAT5B;CREBBP;ANAPC7
Relaxin signaling pathway	2/131	0.740576	1	0.763359	0.229257	SHC3;SOS1
Long-term potentiation	1/67	0.742269	1	0.746269	0.222421	CREBBP
Amphetamine addiction	1/68	0.747441	1	0.735294	0.214044	GRIN3A
Oxidative phosphorylation	2/134	0.751828	1	0.746269	0.212871	NDUFB8;ATP12A
Adherens junction	1/72	0.767114	1	0.694444	0.184111	CREBBP
Melanoma	1/72	0.767114	1	0.694444	0.184111	FGF21
Inositol phosphate metabolism	1/73	0.771788	1	0.684932	0.177428	PIKFYVE
Proteoglycans in cancer	3/203	0.774993	1	0.738916	0.188351	PXN;SOS1;MTOR
Pancreatic cancer	1/75	0.780858	1	0.666667	0.164908	MTOR
Measles	2/144	0.786347	1	0.694444	0.166915	STAT5B;RCHY1
Parkinson disease	2/144	0.786347	1	0.694444	0.166915	NDUFB8;UBE2J1
Salivary secretion	1/78	0.793794	1	0.641026	0.148033	ATP2B2
cAMP signaling pathway	3/211	0.79685	1	0.7109	0.161438	CREBBP;GRIN3A;ATP2B2
Oxytocin signaling pathway	2/154	0.816576	1	0.649351	0.131581	RCAN1;PRKAB1
Peroxisome	1/84	0.817424	1	0.595238	0.119998	DDO
Gap junction	1/86	0.824684	1	0.581395	0.112067	SOS1
Hypertrophic cardiomyopathy (HCM)	1/86	0.824684	1	0.581395	0.112067	PRKAB1
Insulin secretion	1/86	0.824684	1	0.581395	0.112067	SLC2A2
Viral myocarditis	1/87	0.828206	1	0.574713	0.10833	ABL2
Complement and coagulation cascades	1/88	0.831657	1	0.568182	0.104736	F7
Steroid hormone biosynthesis	1/89	0.835038	1	0.561798	0.10128	COMT
Antigen processing and presentation	1/90	0.838352	1	0.555556	0.0979539	IFI30
GnRH signaling pathway	1/90	0.838352	1	0.555556	0.0979539	SOS1
Human papillomavirus infection	5/360	0.849582	1	0.694444	0.113202	CREBBP;PKM;PXN;SOS1;MTOR
Chemical carcinogenesis	1/94	0.850957	1	0.531915	0.0858477	KYAT3
Melanogenesis	1/100	0.86805	1	0.5	0.0707532	CREBBP
AGE-RAGE signaling pathway in diabetic complications	1/101	0.870702	1	0.49505	0.0685424	STAT5B
T cell receptor signaling pathway	1/101	0.870702	1	0.49505	0.0685424	SOS1
Aldosterone synthesis and secretion	1/102	0.873301	1	0.490196	0.0664094	ATP2B2
NF-kappa B signaling pathway	1/102	0.873301	1	0.490196	0.0664094	LYN
Tuberculosis	2/178	0.874065	1	0.561798	0.0756183	CYP27B1;CREBBP
Cellular senescence	2/185	0.887409	1	0.540541	0.064567	GATA4;MTOR
Calcium signaling pathway	2/189	0.894435	1	0.529101	0.0590281	ATP2A1;ATP2B2
C-type lectin receptor signaling pathway	1/112	0.89659	1	0.446429	0.0487305	BCL3
Huntington disease	2/192	0.899435	1	0.520833	0.0552026	CREBBP;NDUFB8
NOD-like receptor signaling pathway	2/205	0.918654	1	0.487805	0.0413879	DHX33;TXNIP
Neuroactive ligand-receptor interaction	4/348	0.920059	1	0.574713	0.0478836	GRIN3A;GALR2;LEPR;LPAR2
Platelet activation	1/125	0.9206	1	0.4	0.0330917	LYN
Dopaminergic synapse	1/135	0.935211	1	0.37037	0.0248088	COMT
MAPK signaling pathway	3/294	0.93569	1	0.510204	0.0339136	SOS1;CRKL;FGF21
Herpes simplex virus 1 infection	5/433	0.93634	1	0.577367	0.0379775	ZFP248;ZFP825;ZFP65;ZFP184;MTOR
Signaling pathways regulating pluripotency of stem cells	1/137	0.937793	1	0.364964	0.02344	ESRRB
Apoptosis	1/141	0.942655	1	0.35461	0.0209414	ERN1
Systemic lupus erythematosus	1/143	0.944942	1	0.34965	0.0198013	H3F3B
Adrenergic signaling in cardiomyocytes	1/148	0.950269	1	0.337838	0.0172333	ATP2B2
Retrograde endocannabinoid signaling	1/150	0.952253	1	0.333333	0.0163083	NDUFB8
Hippo signaling pathway	1/159	0.960247	1	0.314465	0.0127562	RASSF1
Hepatitis C	1/160	0.961048	1	0.3125	0.0124158	SOS1
Influenza A	1/168	0.966906	1	0.297619	0.0100162	CREBBP
Ribosome	1/170	0.968227	1	0.294118	0.00949664	MRPL9
Endocytosis	2/269	0.972393	1	0.371747	0.0104073	NEDD4L;VPS37B
Phagosome	1/180	0.974085	1	0.277778	0.00729341	PIKFYVE
Epstein-Barr virus infection	1/229	0.990467	1	0.218341	0.00209137	LYN
