# Supplementary material for: KLF10 integrates circadian timing and sugar signaling to coordinate hepatic metabolism
Source: eLife. 2021 Aug 17;10:e65574. doi: 10.7554/eLife.65574 (PMC8410083; doi:10.7554/eLife.65574)
Supplement: Figure 6—source data 3. [file elife-65574-fig6-data3.xlsx]

## Sheet: Fig6E
Mcc2				Ivd				Acat1				Fah
y	g			y	g			y	g			y	g
290	WT_LG			1308	WT_LG			438	WT_LG			246	WT_LG
228	WT_LG			1273	WT_LG			444	WT_LG			247	WT_LG
315	WT_LG			1331	WT_LG			512	WT_LG			306	WT_LG
125	WT_HGF			379	WT_HGF			181	WT_HGF			66	WT_HGF
153	WT_HGF			488	WT_HGF			257	WT_HGF			144	WT_HGF
134	WT_HGF			361	WT_HGF			325	WT_HGF			67	WT_HGF
418	hepKO_LG			2992	hepKO_LG			660	hepKO_LG			687	hepKO_LG
296	hepKO_LG			2277	hepKO_LG			678	hepKO_LG			418	hepKO_LG
367	hepKO_LG			2771	hepKO_LG			512	hepKO_LG			385	hepKO_LG
227	hepKO_HGF			1358	hepKO_HGF			417	hepKO_HGF			354	hepKO_HGF
238	hepKO_HGF			1161	hepKO_HGF			437	hepKO_HGF			394	hepKO_HGF
231	hepKO_HGF			1802	hepKO_HGF			396	hepKO_HGF			310	hepKO_HGF
p-value: 0.027314				p-value: 0.023744				p-value: 0.016922				p-value: 0.018785
	WT_HGF	hepKO_HGF	hepKO_LG		WT_HGF	hepKO_HGF	hepKO_LG		WT_HGF	hepKO_HGF	hepKO_LG		WT_HGF	hepKO_HGF	hepKO_LG
hepKO_HGF	0.047966			hepKO_HGF	0.009443			hepKO_HGF	0.014406			hepKO_HGF	0.000961
hepKO_LG	0.001684	0.015339		hepKO_LG	0.000695	0.017642		hepKO_LG	7.3e-05	0.000473		hepKO_LG	0.000215	0.057756
WT_LG	0.011735	0.195016	0.080026	WT_LG	0.017642	0.460856	0.009443	WT_LG	0.000473	0.013784	0.020711	WT_LG	0.025932	0.020024	0.00133
Cpt1a				Ecsh1				Aldh9a1				DecR2
y	g			y	g			y	g			y	g
1659	WT_LG			2512	WT_LG			1803	WT_LG			1094	WT_LG
1579	WT_LG			2535	WT_LG			1573	WT_LG			860	WT_LG
2689	WT_LG			2878	WT_LG			2042	WT_LG			1159	WT_LG
570	WT_HGF			1565	WT_HGF			1090	WT_HGF			364	WT_HGF
849	WT_HGF			1645	WT_HGF			1192	WT_HGF			565	WT_HGF
569	WT_HGF			1497	WT_HGF			1040	WT_HGF			533	WT_HGF
4541	hepKO_LG			2988	hepKO_LG			2814	hepKO_LG			1508	hepKO_LG
3559	hepKO_LG			3864	hepKO_LG			2360	hepKO_LG			1302	hepKO_LG
4147	hepKO_LG			3187	hepKO_LG			2544	hepKO_LG			1384	hepKO_LG
1225	hepKO_HGF			2338	hepKO_HGF			1740	hepKO_HGF			936	hepKO_HGF
1307	hepKO_HGF			2547	hepKO_HGF			1707	hepKO_HGF			879	hepKO_HGF
1508	hepKO_HGF			2279	hepKO_HGF			2025	hepKO_HGF			911	hepKO_HGF
p-value: 0.015564				p-value: 0.021623				p-value: 0.024880				p-value: 0.023744
	WT_HGF	hepKO_HGF	hepKO_LG		WT_HGF	hepKO_HGF	hepKO_LG		WT_HGF	hepKO_HGF	hepKO_LG		WT_HGF	hepKO_HGF	hepKO_LG
hepKO_HGF	0.006271			hepKO_HGF	0.018961			hepKO_HGF	0.014041			hepKO_HGF	0.017642
hepKO_LG	2.5e-05	0.00016		hepKO_LG	0.00042	0.00435		hepKO_LG	0.00087	0.014041		hepKO_LG	0.000695	0.009443
WT_LG	0.00016	0.006271	0.006271	WT_LG	0.00435	0.202934	0.018961	WT_LG	0.014041	0.808887	0.014041	WT_LG	0.009443	0.460856	0.017642
Slc2a4				Ppp1r3c1				Khk				Tkfc				Gck				pck1
y	g			y	g			y	g			y	g			y	g			y	g
4	WT_LG			174	WT_LG			2507	WT_LG			7703	WT_LG			732	WT_LG			107	WT_LG
0	WT_LG			242	WT_LG			1185	WT_LG			4489	WT_LG			996	WT_LG			518	WT_LG
5	WT_LG			389	WT_LG			2446	WT_LG			7333	WT_LG			1603	WT_LG			722	WT_LG
312	WT_HGF			348	WT_HGF			4198	WT_HGF			23903	WT_HGF			527	WT_HGF			7	WT_HGF
264	WT_HGF			410	WT_HGF			7548	WT_HGF			23672	WT_HGF			500	WT_HGF			11	WT_HGF
344	WT_HGF			538	WT_HGF			5830	WT_HGF			20576	WT_HGF			457	WT_HGF			13	WT_HGF
75	hepKO_LG			877	hepKO_LG			3213	hepKO_LG			9009	hepKO_LG			2772	hepKO_LG			2229	hepKO_LG
14	hepKO_LG			583	hepKO_LG			2175	hepKO_LG			6359	hepKO_LG			1794	hepKO_LG			2210	hepKO_LG
15	hepKO_LG			343	hepKO_LG			2703	hepKO_LG			8217	hepKO_LG			2542	hepKO_LG			1691	hepKO_LG
1875	hepKO_HGF			2005	hepKO_HGF			10737	hepKO_HGF			30582	hepKO_HGF			887	hepKO_HGF			40	hepKO_HGF
1511	hepKO_HGF			2260	hepKO_HGF			9971	hepKO_HGF			28108	hepKO_HGF			813	hepKO_HGF			110	hepKO_HGF
1423	hepKO_HGF			1952	hepKO_HGF			13345	hepKO_HGF			45599	hepKO_HGF			1055	hepKO_HGF			91	hepKO_HGF
p-value: 0.015564				p-value: 0.041476				p-value: 0.021623				p-value: 0.021623				p-value: 0.024880				p-value: 0.018785
	WT_HGF	hepKO_HGF	hepKO_LG		WT_HGF	hepKO_HGF	hepKO_LG		WT_HGF	hepKO_HGF	hepKO_LG		WT_HGF	hepKO_HGF	hepKO_LG		WT_HGF	hepKO_HGF	hepKO_LG		WT_HGF	hepKO_HGF	hepKO_LG
hepKO_HGF	0.006271			hepKO_HGF	0.018961			hepKO_HGF	0.044597			hepKO_HGF	0.044597			hepKO_HGF	0.014041			hepKO_HGF	0.016019
hepKO_LG	0.006271	0.00016		hepKO_LG	0.579584	0.073671		hepKO_LG	0.023701	0.001629		hepKO_LG	0.023701	0.001629		hepKO_LG	0.00087	0.014041		hepKO_LG	0.000164	0.00133
WT_LG	0.00016	2.5e-05	0.006271	WT_LG	0.145804	0.008017	0.074603	WT_LG	0.00435	0.000722	0.202934	WT_LG	0.00435	0.000722	0.202934	WT_LG	0.014041	0.808887	0.014041	WT_LG	0.00133	0.057756	0.016019
Fasn				Acly					Acaca			Thrsp
y	g			y	g			y	g			y	g
5685	WT_LG			5867	WT_LG			1061	WT_LG			623	WT_LG
3270	WT_LG			3276	WT_LG			456	WT_LG			387	WT_LG
6333	WT_LG			4410	WT_LG			621	WT_LG			1196	WT_LG
11938	WT_HGF			21442	WT_HGF			2469	WT_HGF			676	WT_HGF
27510	WT_HGF			22085	WT_HGF			2784	WT_HGF			5965	WT_HGF
13012	WT_HGF			27616	WT_HGF			3050	WT_HGF			1136	WT_HGF
11785	hepKO_LG			5304	hepKO_LG			679	hepKO_LG			2785	hepKO_LG
5913	hepKO_LG			4664	hepKO_LG			454	hepKO_LG			1188	hepKO_LG
5959	hepKO_LG			4578	hepKO_LG			425	hepKO_LG			1296	hepKO_LG
56841	hepKO_HGF			33786	hepKO_HGF			3955	hepKO_HGF			16154	hepKO_HGF
37507	hepKO_HGF			28527	hepKO_HGF			3640	hepKO_HGF			14331	hepKO_HGF
63650	hepKO_HGF			30333	hepKO_HGF			4695	hepKO_HGF			25039	hepKO_HGF
p-value: 0.021623				p-value: 0.023744				p-value: 0.021623				p-value: 0.049871
	WT_HGF	hepKO_HGF	hepKO_LG		WT_HGF	hepKO_HGF	hepKO_LG		WT_HGF	hepKO_HGF	hepKO_LG		WT_HGF	hepKO_HGF	hepKO_LG
hepKO_HGF	0.044597			hepKO_HGF	0.058357			hepKO_HGF	0.044597			hepKO_HGF	0.047227
hepKO_LG	0.023701	0.001629		hepKO_LG	0.022052	0.001888		hepKO_LG	0.00435	0.000722		hepKO_LG	0.492943	0.095594
WT_LG	0.00435	0.000722	0.202934	WT_LG	0.009443	0.001562	0.460856	WT_LG	0.023701	0.001629	0.202934	WT_LG	0.292954	0.015473	0.125413

## Sheet: Fig6_sup1
Elovl6
y	g
6006	WT_LG
4391	WT_LG
4029	WT_LG
3936	WT_HGF
3274	WT_HGF
3140	WT_HGF
7335	hepKO_LG
9986	hepKO_LG
7762	hepKO_LG
14403	hepKO_HGF
10744	hepKO_HGF
13032	hepKO_HGF
p-value: 0.015564
	WT_HGF	hepKO_HGF	hepKO_LG
hepKO_HGF	2.5e-05
hepKO_LG	0.00016	0.006271
WT_LG	0.006271	0.00016	0.006271
