# Supplementary material for: KLF10 integrates circadian timing and sugar signaling to coordinate hepatic metabolism
Source: eLife. 2021 Aug 17;10:e65574. doi: 10.7554/eLife.65574 (PMC8410083; doi:10.7554/eLife.65574)
Supplement: Figure 7—source data 1. [file elife-65574-fig7-data1.xlsx]

## Sheet: KLF10_network
Genes bound by KLF10 in their -10/+1kb region or differentially expressed in WT vs HepKO hepatocytes challenged with high sugar.
node name	GO2	logFC-RNAseq	Pval-RNAseq	Mfold	pval	AverageShortestPathLength	Betweenness unDir	BetweennessCentrality	ClosenessCentrality	ClusteringCoefficient	Degree	Eccentricity	EigenVector unDir	isExcludedFromPaths	isInPath	IsSingleNode	NeighborhoodConnectivity	NumberOfDirectedEdges	NumberOfUndirectedEdges	PartnerOfMultiEdgedNodePairs	Radiality	score	selected	SelfLoops	shared name	Stress	TopologicalCoefficient
PDE3A	camp catabolic process	-1.13173	0.171577	2.10914	0.00166905	6.76574	0	0	0.147803	1	6	17	6.51521e-13			false	6.66667	6	0	0	0.685908	0.727886	false	0	MBD2	4	0.833333
PDE4A	camp catabolic process	0.803951	0.17579	2.14731	0.0013683	6.76574	0	0	0.147803	1	6	17	6.51521e-13	false	false	false	6.66667	6	0	0	0.741114	6.35728	false	0	WARS	30624	0.559524
PDE4C	camp catabolic process	0.973738	0.0160058			6.76574	0	0	0.147803	1	6	17	6.51521e-13	false	false	false	6.66667	6	0	0	0.741254	1.53762	false	0	YARS	0	0.466667
PDE4B	camp catabolic process	-0.879447	0.00232488			6.76574	0	0	0.147803	1	6	17	6.51521e-13	false	false	false	6.66667	6	0	0	0.765323	0.753955	false	0	PSPH	163994	0.189702
PDE1B	camp catabolic process	-0.13459	0.893183	2.10914	0.00166905	6.76574	0	0	0.147803	1	6	17	6.51521e-13			false	6.66667	6	0	0	0.721592	2.45278	false	0	SARS	0	0.673913
PDE6B	camp catabolic process	-0.167442	0.831856	2.00416	0.00355361	6.76574	0	0	0.147803	1	6	17	6.51521e-13	false	false	false	6.66667	6	0	0	0.793381	0.939406	false	0	PLD2	142706	0.382488
PDE10A	camp catabolic process	-1.82112	0.00928296			5.7733	9492.8	0.0150193	0.173211	0.444444	10	16	7.94856e-11	false	false	false	6.8	10	0	0	0.793381	1.50478	false	0	PLD1	142706	0.382488
DPAGT1	carbohydrate metabolic process	-0.274578	0.0281325			4.76322	2638.27	0.00428214	0.209942	0.285714	7	14	8.88308e-08	false	false	false	16.5714	7	0	0	0.793381	0.00945206	false	0	PLD3	142706	0.382488
GFPT1	carbohydrate metabolic process	-1.23495	0.0527772	2.29047	0.000496295	5.26196	4696.34	0.00742632	0.190043	0.444444	10	13	1.14296e-12	false	false	false	11.8	10	0	0	0.741044	0.937577	false	0	LARS	0	0.75
GANC	carbohydrate metabolic process	0.695265	0.0318759			6.29471	451.116	0.00071646	0.158864	0.6	6	16	2.82744e-12	false	false	false	6.83333	6	0	0	0.771341	3.00162	false	0	DNM1	30168	0.50266
AMDHD2	carbohydrate metabolic process	0.294246	0.0938753			5.25189	2881.43	0.00454138	0.190408	0	3	11	2.79562e-12	false	false	false	8.66667	3	0	0	0.771341	1.64769	false	0	DNM1L	30168	0.50266
ALG13	carbohydrate metabolic process	-0.44375	0.0251481			5.32242	31.2996	4.994e-05	0.187885	0.666667	3	14	1.42667e-09	false	false	false	11	3	0	0	0.771341	1.72783	false	0	DNM2	30168	0.50266
FBP1	carbohydrate metabolic process	0.704722	0.0671069			5.69018	1609.95	0.00255696	0.175741	0.714286	7	14	2.78927e-12	false	false	false	8.28571	7	0	0	0.777428	5.49639	false	0	DTYMK	143700	0.675325
PYGL	carbohydrate metabolic process	0.801778	0.000384921			5.49748	1767.04	0.00280771	0.181901	0.472222	10	15	7.35999e-11	false	false	false	9.11111	10	0	0	0.790932	0.934209	false	0	DPAGT1	173486	0.338192
PYGM	carbohydrate metabolic process	-0.632186	0.254569	2.53097	7.1555e-05	5.49748	1767.04	0.00280771	0.181901	0.472222	10	15	7.35999e-11			false	9.11111	10	0	0	0.633291	4.5698	false	0	DECR2	0	0.666667
AGL	carbohydrate metabolic process	0.887201	0.00422978			5.57935	971.213	0.00153803	0.179233	0.333333	8	15	6.85368e-12	false	false	false	10.8333	8	0	0	0.633291	0.156222	false	0	DECR1	0	0.666667
GCK	carbohydrate metabolic process	1.79911	0.00184276	2.57677	5.52268e-05	5.99874	3918.31	0.00621827	0.166702	0.321429	8	16	3.40671e-10	false	false	false	5.25	8	0	0	0.688707	3.51324	false	0	ECI2	1390606	0.385417
HKDC1	carbohydrate metabolic process	-0.400961	0.510211	2.81218	6.75087e-06	5.92947	1161.77	0.00182721	0.168649	0.333333	9	15	6.56687e-12			false	6.22222	9	0	0	0.695004	0.161209	false	0	PIK3CD	1408	0.56682
MGAM	carbohydrate metabolic process	0.535239	0.0216911			5.66373	1541.96	0.00243945	0.176562	0.619048	7	15	5.77172e-12	false	false	false	8.85714	7	0	0	0.695004	-3.08705	false	0	PIK3CB	1408	0.56682
SLC35B4	carbohydrate metabolic process	0.696512	0.00352677			5.24181	5411.89	0.00854119	0.190774	0.0888889	10	13	4.42881e-08	false	false	false	4	10	0	0	0.695004	0.537824	false	0	PIK3R1	1408	0.56682
GALM	carbohydrate metabolic process	1.32108	0.0132366			5.67128	1526.11	0.00241426	0.176327	0.666667	6	15	5.71818e-12	false	false	false	9.5	6	0	0	0.695004	1.08516	false	0	PIK3R2	1408	0.56682
NAGK	carbohydrate metabolic process	-0.139599	0.509121	2.43362	0.000170083	5.57305	1721.34	0.00271313	0.179435	0	4	12	5.90286e-12	false	false	false	3	4	0	26	0.779317	0.842445	false	0	SLC24A3	1267474	0.151042
UAP1	carbohydrate metabolic process	0.0962765	0.442868	2.14731	0.0013683	4.51763	26773.4	0.0423893	0.221355	0.116667	16	13	4.8069e-08			false	12	16	0	26	0.779317	3.00162	false	0	SLC8A2	1267474	0.151042
ACLY	carbohydrate metabolic process	0.431537	0.0373883			5.85642	529.333	0.00083751	0.170753	0.333333	3	16	9.76823e-11	false	false	false	12.3333	3	0	2	0.723971	5.30681	false	0	ATP2B2	0	0.7
PCK1	carbohydrate metabolic process	2.97593	0.00125751			4.86146	5389.44	0.00852974	0.205699	0.419118	17	15	6.20168e-09	false	false	false	21.1176	17	0	2	0.723971	5.30681	false	0	ATP2B4	0	0.7
PCK2	carbohydrate metabolic process	-1.02013	0.0464922			4.86146	5389.44	0.00852974	0.205699	0.419118	17	15	6.20168e-09	false	false	false	21.1176	17	0	0	0.725441	3.88931	false	0	ATP2A2	481400	0.371429
PGM3	carbohydrate metabolic process	0.832881	0.0259327			5.2733	1353.29	0.00214442	0.189635	0	2	13	3.78542e-10	false	false	false	10	2	0	0	0.725441	4.49834	false	0	ATP2A1	481400	0.371429
GNE	carbohydrate metabolic process	1.11282	0.00237786			5.51134	1623.3	0.00256883	0.181444	0	3	14	7.27265e-10	false	false	false	9	3	0	0	0.725441	3.72926	false	0	ATP2C1	481400	0.371429
GLA	carbohydrate metabolic process	0.569143	0.0332308			5.68136	492.51	0.00077903	0.176014	0.333333	3	15	5.64918e-12	false	false	false	13.3333	3	0	0	0.687308	1.6122	false	0	GCDH	13398	0.5
GBE1	carbohydrate metabolic process	-0.232351	0.0714489	2.00416	0.00355361	6.49496	0	0	0.153965	1	2	16	1.15905e-12	false	false	false	9	2	0	6	0.72621	4.67311	false	0	SLC9A5	21312	0.718045
RENBP	carbohydrate metabolic process	0.786008	0.100776			6.51008	0	0	0.153608	0	1	15	5.72649e-12	false	false	false	3	1	0	6	0.72621	1.97501	false	0	SLC9A8	21312	0.718045
GANAB	carbohydrate metabolic process	-0.0478305	0.652026	2.71993	1.70341e-05	6.53023	0	0	0.153134	1	4	16	1.64445e-13			false	7	4	0	0	0.698433	3.88931	false	0	PDF	0	0.8125
GAPDHS	carbohydrate metabolic process	0.729387	0.190429	2.10914	0.00166905	5.80479	1481.19	0.00235296	0.172272	0.333333	4	15	3.3647e-12			false	6.66667	4	0	6	0.765253	2.44851	false	0	SLC44A1	824878	0.407407
PGM2L1	carbohydrate metabolic process	0.53292	0.0705373			5.40176	4314.52	0.00684014	0.185125	0.428571	8	15	7.35568e-11	false	false	false	9.75	8	0	6	0.72614	9.14907	false	0	SLC4A11	21312	0.807018
PHGDH	carbohydrate metabolic process	-1.31629	0.0937747			5.87028	2228.27	0.00352743	0.17035	0.333333	4	14	5.96422e-13	false	false	false	4.5	4	0	6	0.762175	3.88931	false	0	SLC4A5	750964	0.334361
MGAT5	carbohydrate metabolic process	0.461468	0.0176724			5.51259	31.2996	4.994e-05	0.181403	0.666667	3	14	7.33037e-10	false	false	false	10	3	0	6	0.761825	3.88931	false	0	SLC6A6	209280	0.651568
GALK2	carbohydrate metabolic process	0.348636	0.0652661	2.00416	0.00355361	6.25063	0	0	0.159984	0	1	12	2.2013e-14	false	false	false	3	1	0	6	0.72614	2.44851	false	0	SLC6A9	21312	0.807018
GLYCTK	carbohydrate metabolic process	1.11011	0.0470544			6.81234	0	0	0.146792	1	2	15	2.1712e-14	false	false	false	5	2	0	6	0.765393	1.45301	false	0	SLC6A13	336620	0.408663
FUK	carbohydrate metabolic process	0.329277	0.0852044			6.50504	0	0	0.153727	0	1	13	2.72499e-12	false	false	false	2	1	0	6	0.769801	1.62291	false	0	SLC6A12	593744	0.335821
ENO3	carbohydrate metabolic process	-0.461379	0.0588171	2.71993	1.70341e-05	5.81108	575.422	0.00091272	0.172085	0.666667	5	16	9.84563e-11	false	false	false	11	5	0	6	0.72614	0.204694	false	0	SLC6A4	21312	0.807018
ENO2	carbohydrate metabolic process	-2.01389	0.166469	2.81218	6.75087e-06	5.81108	575.422	0.00091272	0.172085	0.666667	5	16	9.84563e-11	false	false	false	11	5	0	6	0.72614	3.93693	false	0	SLC10A1	21312	0.807018
BPGM	carbohydrate metabolic process	0.836785	0.00394712			6.15239	1089.1	0.0017282	0.162538	0.266667	8	15	2.16104e-12	false	false	false	4.16667	8	0	6	0.72642	1.34165	false	0	SLC17A3	21312	0.589474
PSAT1	carbohydrate metabolic process	-1.7334	0.00709715			5.87154	1937.57	0.00306415	0.170313	0	2	13	6.12637e-15	false	false	false	6.5	2	0	6	0.72642	1.52194	false	0	SLC17A2	21312	0.589474
MGAT4B	carbohydrate metabolic process	-0.414729	0.0170861			5.51008	32.633	5.206e-05	0.181486	0.666667	4	14	7.38765e-10	false	false	false	8.25	4	0	6	0.72614	1.25897	false	0	SLC1A2	21312	0.807018
MDH1	carbohydrate metabolic process	0.447688	0.0730253			5.85516	529.333	0.00083751	0.170789	0.666667	4	16	9.84576e-11	false	false	false	10.25	4	0	6	0.72642	3.00162	false	0	SCN4A	21312	0.589474
MDH2	carbohydrate metabolic process	-0.739505	0.0574943			5.85516	529.333	0.00083751	0.170789	0.666667	4	16	9.84576e-11	false	false	false	10.25	4	0	6	0.72642	3.72926	false	0	SCNN1A	21312	0.589474
GNPDA2	carbohydrate metabolic process	0.0161287	0.961857	2.24975	0.000617604	6.02015	345.201	0.000544	0.166109	0.785714	11	14	8.60393e-14	false	false	false	7.875	11	0	6	0.72642	2.45999	false	0	SLC34A2	21312	0.589474
PFKFB1	carbohydrate metabolic process	1.58328	0.0108668			6.02015	345.201	0.000544	0.166109	0.785714	9	14	8.60393e-14	false	false	false	7.875	9	0	6	0.799958	3.00162	false	0	SLC38A1	4770466	0.246575
PFKFB2	carbohydrate metabolic process	0.841755	0.00631951			6.02015	345.201	0.000544	0.166109	0.785714	9	14	8.60281e-14	false	false	false	7.875	9	0	6	0.72642	2.24717	false	0	SLC20A2	21312	0.589474
PFKFB4	carbohydrate metabolic process	1.24257	0.104887	2.81218	6.75087e-06	6.02015	345.201	0.000544	0.166109	0.785714	9	14	8.60281e-14	false	false	false	7.875	9	0	6	0.72642	3.14704	false	0	SLC20A1	21312	0.589474
GFPT2	carbohydrate metabolic process	-0.290439	0.739061	2.67158	2.25232e-05	5.26196	4696.34	0.00742632	0.190043	0.444444	10	13	1.14287e-12	false	false	false	11.8	10	0	6	0.738315	0.371217	false	0	SLC23A2	189944	0.584375
PFKM	carbohydrate metabolic process	0.812521	0.0323222	2.00416	0.00355361	6.1738	546.906	0.00086861	0.161975	0.733333	6	15	2.79314e-12	false	false	false	7.33333	6	0	4	0.725091	3.99327	false	0	KCNH2	653376	0.439316
PFKP	carbohydrate metabolic process	-0.861683	0.451574	2.71993	1.70341e-05	6.1738	546.906	0.00086861	0.161975	0.733333	6	15	2.79314e-12	false	false	false	7.33333	6	0	6	0.72642	0.0685183	false	0	CIB3	21312	0.589474
MAN2A2	carbohydrate metabolic process	0.545036	0.0419512			6.50882	0	0	0.153638	0	1	15	5.7723e-12	false	false	false	4	1	0	6	0.72642	0.101501	false	0	HCN3	21312	0.589474
GCNT4	carbohydrate metabolic process	0.587765	0.0637478	2.29047	0.000496295	5.51259	31.2996	4.994e-05	0.181403	0.666667	3	14	7.32992e-10	false	false	false	9.66667	3	0	4	0.725091	4.49834	false	0	KCNA7	653376	0.439316
KHK	carbohydrate metabolic process	0.999261	0.00467165			6.43577	0	0	0.155382	0	1	15	2.76851e-12	false	false	false	6	1	0	4	0.725091	2.81305	false	0	KCNN2	653376	0.439316
ALDOA	carbohydrate metabolic process	-0.471748	0.0320516			5.43703	6884.08	0.0109156	0.183924	0.0666667	7	14	3.51599e-10	false	false	false	4.83333	7	0	4	0.725091	3.00162	false	0	KCNQ2	653376	0.439316
MGAT2	carbohydrate metabolic process	0.362185	0.0360464			5.51008	1623.3	0.00256883	0.181486	0.333333	4	14	7.33083e-10	false	false	false	7.75	4	0	28	0.779037	2.33674	false	0	NKAIN1	1160078	0.19302
FUCA2	carbohydrate metabolic process	0.552412	0.056423			5.5063	1592	0.00251889	0.18161	0	2	12	3.46075e-10	false	false	false	8	2	0	0	0.653303	2.87505	false	0	DDAH1	0	0.75
PHKB	carbohydrate metabolic process	-0.0617673	0.7173	2.86308	5.00265e-06	5.5063	713.453	0.00114041	0.18161	0.714286	7	15	7.35373e-11			false	10.8571	7	0	0	0.653303	3.88931	false	0	DDAH2	0	0.75
PPA2	carbohydrate metabolic process	-0.0958009	0.607682	2.39036	0.000215953	5.99496	403.029	0.0006358	0.166807	0.7	5	14	1.8135e-12	false	false	false	7	5	0	0	0.714945	0.559203	false	0	TDG	0	0
LHPP	carbohydrate metabolic process	0.217916	0.609311	2.14731	0.0013683	5.99496	403.029	0.0006358	0.166807	0.7	5	14	1.8135e-12			false	7	5	0	0	0.722992	0.939406	false	0	PARP1	0	0.644444
GOT1L1	carbohydrate metabolic process	0.0836362	0.947076	2.43362	0.000170083	6.85013	1.33333	2.12e-06	0.145983	0.333333	3	17	2.31966e-12			false	3.66667	3	0	0	0.722992	0.317634	false	0	PARP14	0	0.644444
B3GNT3	carbohydrate metabolic process	0.549157	0.443604	2.43362	0.000170083	5.51259	31.2996	4.994e-05	0.181403	0.666667	3	14	7.32992e-10			false	9.66667	3	0	0	0.722992	0.939406	false	0	PARP2	0	0.644444
MBD2	cellular amino acid and small molecule metabolic process	-0.524678	0.0372935			6.65365	1.33333	2.12e-06	0.150293	0.333333	3	14	7.28417e-15	false	false	false	3.66667	3	0	0	0.722992	2.41215	false	0	PARP4	0	0.644444
WARS	cellular amino acid and small molecule metabolic process	-0.84456	0.0215185	2.71993	1.70341e-05	5.65995	529.333	0.00083751	0.17668	0.333333	3	13	3.07822e-13	false	false	false	16	3	0	0	0.722992	0.0225036	false	0	PARP8	0	0.644444
YARS	cellular amino acid and small molecule metabolic process	-0.603894	0.0123357			5.65743	0	0	0.176759	1	4	13	3.12731e-13	false	false	false	14	4	0	0	0.722992	0.787048	false	0	PARP10	0	0.644444
PSPH	cellular amino acid and small molecule metabolic process	-0.827188	0.0359886			5.22418	5812.43	0.00919107	0.191418	0.277778	9	12	1.81744e-13	false	false	false	7.88889	9	0	0	0.722992	2.44851	false	0	PARP11	0	0.644444
SARS	cellular amino acid and small molecule metabolic process	-0.595218	0.00353291			6.01134	0	0	0.166352	1	2	13	9.20392e-15	false	false	false	15.5	2	0	0	0.722992	1.6554	false	0	PARP9	0	0.644444
LARS	cellular amino acid and small molecule metabolic process	-0.712256	0.0280033			5.66121	0	0	0.176641	1	3	13	6.08389e-13	false	false	false	21	3	0	0	0.722992	1.7496	false	0	TNKS	0	0.644444
GCDH	cellular amino acid and small molecule metabolic process	0.771683	0.012691			6.62846	1029.96	0.00162491	0.150865	0	2	11	1.28993e-15	false	false	false	6.5	2	0	0	0.766233	4.67311	false	0	PAFAH1B2	0	0.42029
PDF	cellular amino acid and small molecule metabolic process	0.248472	0.63093	2.29047	0.000496295	6.42821	0	0	0.155564	1	2	14	1.2721e-14	false	false	false	13	2	0	0	0.766233	2.43821	false	0	PAFAH1B1	0	0.42029
DDAH1	cellular amino acid and small molecule metabolic process	-0.772172	0.00198414			7.24055	0	0	0.138111	1	2	15	4.10658e-16	false	false	false	3	2	0	28	0.779037	0.348393	false	0	ATP1A2	1160078	0.19302
DDAH2	cellular amino acid and small molecule metabolic process	-0.240236	0.643529	2.29047	0.000496295	7.24055	0	0	0.138111	1	2	15	4.10658e-16	false	false	false	3	2	0	28	0.779037	1.0686	false	0	ATP1B1	1160078	0.19302
OAT	cellular amino acid and small molecule metabolic process	0.860035	0.082145			5.64861	6079.11	0.00964852	0.177035	0.214286	8	14	1.01446e-13	false	false	false	4.75	8	0	6	0.72642	5.49639	false	0	CIB1	21312	0.589474
SLC25A15	cellular amino acid and small molecule metabolic process	0.846168	0.00221698			5.92443	0	0	0.168793	1	3	14	9.83952e-14	false	false	false	8.66667	3	0	28	0.779037	1.18764	false	0	ATP1B3	1160078	0.19302
GLS	cellular amino acid and small molecule metabolic process	-1.33406	0.0140535			5.32242	477.129	0.0007578	0.187885	0.8	5	13	8.71531e-13	false	false	false	14.8	5	0	1	0.696613	3.00162	false	0	GLRX	19568	0.35
GMPR2	cellular amino acid and small molecule metabolic process	-0.107032	0.729161	2.14731	0.0013683	5.06423	1371.67	0.00215884	0.197463	0.166667	4	14	5.0994e-11			false	12	4	0	0	0.789183	0.336523	false	0	GUK1	1381374	0.326705
SLC7A11	cellular amino acid and small molecule metabolic process	-1.98594	0.00195339	2.14731	0.0013683	5.66373	0	0	0.176562	0	1	13	3.01231e-13	false	false	false	28	1	0	0	0.741744	0.14992	false	0	OAT	74526	0.25
SLC7A5	cellular amino acid and small molecule metabolic process	-1.60772	0.0167775			5.53401	866.852	0.00137971	0.180701	0.213235	19	13	8.28372e-13	false	false	false	6.94118	19	0	0	0.72642	2.79383	false	0	SLC25A15	0	0.666667
CBS	cellular amino acid and small molecule metabolic process	2.35377	1.53434e-07	2.14731	0.0013683	5.7796	4842.08	0.00766531	0.173022	0.2	5	13	3.26269e-14	false	false	false	9.6	5	0	0	0.582634	0.153482	false	0	RPE	0	0
AHCYL2	cellular amino acid and small molecule metabolic process	-0.441592	0.0118954			5.44207	4053.27	0.00641788	0.183754	0.333333	6	14	1.48361e-12	false	false	false	8.66667	6	0	0	0.722922	3.72926	false	0	SGSH	0	0
AHCYL1	cellular amino acid and small molecule metabolic process	-0.356328	0.0386023			5.44207	4053.27	0.00641788	0.183754	0.333333	6	14	1.48361e-12	false	false	false	8.66667	6	0	0	0.746082	1.3572	false	0	ASRGL1	0	0.583333
GPT	cellular amino acid and small molecule metabolic process	0.498187	0.0376855	2.00416	0.00355361	5.28841	4055.11	0.00640334	0.189093	0.666667	4	13	1.49742e-12	false	false	false	14.25	4	0	0	0.780507	3.39662	false	0	ASPG	175722	0.253333
AMPD3	cellular amino acid and small molecule metabolic process	-0.935235	0.09823	2.14731	0.0013683	4.64232	3503.93	0.00668924	0.21541	0.222222	10	13	1.12657e-10	false	false	false	10.9	10	0	0	0.759866	1.44219	false	0	GLS	63902	0.379487
AMPD2	cellular amino acid and small molecule metabolic process	-0.481763	0.0112335			4.78589	3503.93	0.00379145	0.208947	0.277778	9	14	1.12657e-10	false	false	false	10.7778	9	0	0	0.716835	1.32994	false	0	NARS	0	0
SLC7A6	cellular amino acid and small molecule metabolic process	-1.59651	0.00746318			4.68136	12489.1	0.0197557	0.213613	0.235294	20	12	3.82285e-11	false	false	false	9.33333	20	0	0	0.77232	8.89978	false	0	ASNS	323602	0.219638
SLC3A2	cellular amino acid and small molecule metabolic process	-1.08872	0.0182559			4.66499	32858	0.0519761	0.214363	0.134921	30	12	3.82527e-11	false	false	false	6.96429	30	0	0	0.706829	0.212962	false	0	KMT2A	0	0.732057
RARS	cellular amino acid and small molecule metabolic process	-0.901634	0.00352514	2.39036	0.000215953	5.34383	71.6355	0.00011316	0.187132	0.7	5	13	6.14649e-12	false	false	false	15.8	5	0	0	0.706829	2.03359	false	0	KMT2C	0	0.732057
TDO2	cellular amino acid and small molecule metabolic process	2.32067	0.00227955			5.65869	529.333	0.00083751	0.176719	0.666667	4	13	3.10199e-13	false	false	false	13	4	0	0	0.706829	1.22012	false	0	KMT2E	0	0.732057
IDO2	cellular amino acid and small molecule metabolic process	1.68895	0.00736233			5.65869	529.333	0.00083751	0.176719	0.666667	4	13	3.10194e-13	false	false	false	13	4	0	0	0.706829	1.37829	false	0	ASH1L	0	0.732057
ARG2	cellular amino acid and small molecule metabolic process	-0.854802	0.243537	2.81218	6.75087e-06	5.0995	3839.04	0.00609125	0.196098	0.472222	9	13	6.19767e-12	false	false	false	11.5556	9	0	0	0.706829	0.662979	false	0	DOT1L	0	0.732057
MOCOS	cellular amino acid and small molecule metabolic process	0.949538	0.0100398			6.00504	5290.52	0.00836777	0.166527	0.380952	7	14	2.4046e-14	false	false	false	5.42857	7	0	0	0.706829	1.46157	false	0	SETD7	0	0.732057
HAL	cellular amino acid and small molecule metabolic process	1.83057	0.00816424			8.52393	0	0	0.117317	0	1	16	3.94178e-19	false	false	false	2	1	0	0	0.706829	0.443541	false	0	PRDM9	0	0.732057
HAO1	cellular amino acid and small molecule metabolic process	1.07129	0.020973			5.77834	2746.43	0.00436377	0.17306	0	2	14	1.26553e-14	false	false	false	9.5	2	0	0	0.706829	3.88931	false	0	SETD1B	0	0.732057
AASS	cellular amino acid and small molecule metabolic process	1.49406	0.0694258			6.65365	0	0	0.150293	0	1	14	1.03878e-15	false	false	false	4	1	0	0	0.814931	2.97	false	0	CTPS2	4242090	0.273333
ALDH7A1	cellular amino acid and small molecule metabolic process	0.533104	0.0178383			5.65491	4776.85	0.00754112	0.176837	0	4	13	1.31915e-13	false	false	false	5.25	4	0	0	0.774209	3.14704	false	0	GMPR2	39784	0.348485
AARS	cellular amino acid and small molecule metabolic process	-0.893471	0.0152684			6.02015	0	0	0.166109	1	4	14	1.23438e-14	false	false	false	7.5	4	0	0	0.763224	0.056516	false	0	GFPT1	313516	0.251064
GNMT	cellular amino acid and small molecule metabolic process	2.56746	0.000696442			6.43955	1	1.59e-06	0.15529	0	2	14	6.35822e-15	false	false	false	5.5	2	0	0	0.798559	2.44851	false	0	NADSYN1	1545494	0.203372
AMDHD1	cellular amino acid and small molecule metabolic process	1.03215	0.0174216			6.52897	3180	0.00503143	0.153164	0	2	14	6.25881e-15	false	false	false	5	2	0	0	0.705849	0.842773	false	0	GANC	4176	0.392157
UROC1	cellular amino acid and small molecule metabolic process	1.45276	0.0272387			7.52519	1592	0.00251889	0.132887	0	2	15	4.92898e-17	false	false	false	1.5	2	0	0	0.667926	3.14704	false	0	MOGS	3376	0.541667
QDPR	cellular amino acid and small molecule metabolic process	0.978068	0.00872991			6.6335	0	0	0.15075	1	2	14	2.55613e-15	false	false	false	4.5	2	0	0	0.737685	0.416671	false	0	SRD5A3	0	0
PCBD1	cellular amino acid and small molecule metabolic process	0.598054	0.0103237			6.6335	0	0	0.15075	1	2	14	2.54685e-15	false	false	false	4.5	2	0	0	0.688147	3.00162	false	0	CYBRD1	10716	0.5625
PAH	cellular amino acid and small molecule metabolic process	1.55549	0.00162407			5.63602	3187.61	0.00504352	0.17743	0.428571	7	13	3.15251e-13	false	false	false	8.71429	7	0	0	0.763784	0.0522224	false	0	AMDHD2	31024	0.333333
IMPDH1	cellular amino acid and small molecule metabolic process	-1.08353	0.00501733	2.24975	0.000617604	5.43577	340.98	0.00053603	0.183967	0.666667	4	14	2.57325e-12	false	false	false	9	4	0	0	0.759866	1.01629	false	0	ALG13	11720	0.52381
IMPDH2	cellular amino acid and small molecule metabolic process	0.432013	0.18648	2.29047	0.000496295	5.43577	340.98	0.00053603	0.183967	0.666667	4	14	2.57325e-12			false	9	4	0	0	0.739435	0.297911	false	0	FBP1	31524	0.542857
HGD	cellular amino acid and small molecule metabolic process	2.6677	0.00191121			6.88287	603.753	0.00096019	0.145288	0	2	13	3.71407e-17	false	false	false	8	2	0	0	0.701651	2.20527	false	0	SLC17A8	114	0.666667
SPTLC2	cellular amino acid and small molecule metabolic process	-0.495617	0.00631244			4.88035	5880.74	0.00935295	0.204903	0.607143	8	12	6.33766e-12	false	false	false	15.875	8	0	0	0.802407	0.0544239	false	0	GLUL	517216	0.175711
SPTSSA	cellular amino acid and small molecule metabolic process	0.50998	0.00772759			4.88035	5880.74	0.00935295	0.204903	0.607143	8	12	6.33766e-12	false	false	false	15.875	8	0	0	0.701651	3.72926	false	0	SLC17A7	114	0.666667
SPTLC1	cellular amino acid and small molecule metabolic process	0.0775128	0.533168	2.57677	5.52268e-05	4.88035	5880.74	0.00935295	0.204903	0.607143	8	12	6.33766e-12			false	15.875	8	0	0	0.640078	0.669635	false	0	UGT2A3	2	0.75
TAT	cellular amino acid and small molecule metabolic process	1.33777	0.0153048			5.60327	983.092	0.00155809	0.178467	0.5	4	13	3.10233e-13	false	false	false	13.75	4	0	0	0.640078	0.0653902	false	0	UGT1A9	2	0.75
SMOX	cellular amino acid and small molecule metabolic process	-1.2094	0.0472759			5.91184	0	0	0.169152	1	4	12	1.37669e-13	false	false	false	7	4	0	0	0.740904	3.14704	false	0	SLC7A11	0	0
GRHPR	cellular amino acid and small molecule metabolic process	0.736955	0.0204712			6.0529	0	0	0.16521	0	1	14	1.18668e-14	false	false	false	11	1	0	2	0.748111	1.31252	false	0	SLC7A5	8416	0.19281
IVD	cellular amino acid and small molecule metabolic process	1.85459	2.88928e-06			6.85264	0	0	0.145929	0	1	12	1.69959e-17	false	false	false	3	1	0	0	0.747481	1.45142	false	0	BHMT	1480074	0.190625
KYNU	cellular amino acid and small molecule metabolic process	0.637449	0.0508469			5.96599	4181.06	0.00661731	0.167617	0.321429	10	14	2.40549e-14	false	false	false	4.625	10	0	0	0.698643	3.63259	false	0	BHMT2	930972	0.47619
AGXT	cellular amino acid and small molecule metabolic process	0.625879	0.0584574			5.05416	20310.4	0.0321514	0.197857	0.181818	12	13	1.50708e-12	false	false	false	8.63636	12	0	0	0.734467	6.086	false	0	CBS	564948	0.29375
HAAO	cellular amino acid and small molecule metabolic process	1.50624	0.0553835			6.96474	0	0	0.14358	0	1	15	1.89343e-16	false	false	false	8	1	0	0	0.753219	1.56422	false	0	AHCYL2	1838262	0.288889
DHTKD1	cellular amino acid and small molecule metabolic process	2.00027	0.0050151			6.9471	515.356	0.00081248	0.143945	0	2	12	1.98148e-17	false	false	false	3	2	0	0	0.753219	0.702641	false	0	AHCYL1	1838262	0.288889
AADAT	cellular amino acid and small molecule metabolic process	1.17236	0.00418057			6.26322	1946.81	0.00308327	0.159662	0.166667	4	13	1.22901e-15	false	false	false	4	4	0	0	0.806325	3.72926	false	0	VDAC3	7351632	0.132859
FARS2	cellular amino acid and small molecule metabolic process	0.358023	0.0464147			5.66121	0	0	0.176641	1	3	13	3.10225e-13	false	false	false	16	3	0	0	0.761755	2.44851	false	0	GPT	536272	0.316667
ODC1	cellular amino acid and small molecule metabolic process	-0.59795	0.0847488			5.58816	2102.72	0.00335626	0.17895	0.4	5	13	1.23104e-13	false	false	false	7.8	5	0	0	0.739994	9.92681	false	0	NIT1	0	0.701149
PAOX	cellular amino acid and small molecule metabolic process	3.40031	2.79992e-05	2.86308	5.00265e-06	5.73426	32.9247	5.192e-05	0.174391	0.833333	5	12	1.39216e-13	false	false	false	6.5	5	0	0	0.739994	4.67311	false	0	NIT2	0	0.701149
SAT2	cellular amino acid and small molecule metabolic process	0.867423	0.0543169			5.4005	2260.38	0.00358474	0.185168	0.380952	10	12	2.93582e-12	false	false	false	5.57143	10	0	1	0.75014	2.60228	false	0	PYGL	214568	0.198068
SRM	cellular amino acid and small molecule metabolic process	-0.889488	0.0178341			5.38035	3222.01	0.00509511	0.185861	0.333333	6	12	1.99938e-13	false	false	false	5.5	6	0	1	0.75014	3.86108	false	0	PYGM	214568	0.198068
AGMAT	cellular amino acid and small molecule metabolic process	0.40993	0.023426	2.00416	0.00355361	6.17128	0	0	0.162041	1	2	13	2.46925e-14	false	false	false	6.5	2	0	2	0.745592	2.32102	false	0	AGL	196692	0.277778
AOC3	cellular amino acid and small molecule metabolic process	-1.59961	0.00848447	2.14731	0.0013683	4.98111	5252.47	0.00830993	0.200759	0.466667	12	11	1.44066e-11	false	false	false	10.9	12	0	0	0.722292	1.82005	false	0	GCK	231436	0.357143
ADI1	cellular amino acid and small molecule metabolic process	0.382412	0.0109766	2.10914	0.00166905	6.42821	0	0	0.155564	1	2	14	1.2721e-14	false	false	false	13	2	0	0	0.72614	0.84665	false	0	HKDC1	33812	0.25
GGT6	cellular amino acid and small molecule metabolic process	2.1869	3.32821e-05			6.24181	806.248	0.00127953	0.16021	0.666667	3	14	8.96121e-16	false	false	false	10	3	0	0	0.740904	1.12452	false	0	MGAM	258768	0.260504
GGT7	cellular amino acid and small molecule metabolic process	0.0298626	0.977915	2.39036	0.000215953	6.24181	806.248	0.00127953	0.16021	0.666667	3	14	8.96121e-16	false	false	false	10	3	0	0	0.764344	2.45406	false	0	SLC35B4	73490	0.185
ASS1	cellular amino acid and small molecule metabolic process	1.48261	0.0132094	2.71993	1.70341e-05	6.24307	3180	0.00503143	0.160178	0.333333	4	14	5.46355e-14	false	false	false	4.25	4	0	0	0.634481	2.44851	false	0	HSD17B2	84	0.571429
ARG1	cellular amino acid and small molecule metabolic process	2.05446	0.003931			5.0995	3839.04	0.00609125	0.196098	0.472222	9	13	6.19767e-12	false	false	false	11.5556	9	0	0	0.695284	4.67311	false	0	SLC35D1	208558	0.485714
ASL	cellular amino acid and small molecule metabolic process	0.957426	0.00362422	2.00416	0.00355361	5.5529	1828.21	0.00289421	0.180086	0.52381	7	13	7.97061e-13	false	false	false	11.2857	7	0	0	0.740484	1.48602	false	0	GALM	258512	0.296875
ALDH6A1	cellular amino acid and small molecule metabolic process	0.706867	0.0044065	2.24975	0.000617604	5.01763	13827.5	0.0216719	0.199297	0.19697	12	10	2.64743e-13	false	false	false	9.16667	12	0	0	0.760985	2.175	false	0	ENTPD5	0	0.712121
BCAT2	cellular amino acid and small molecule metabolic process	1.67906	0.0020805			5.60579	1670.17	0.00264592	0.178387	0.5	4	13	6.08829e-13	false	false	false	16.5	4	0	0	0.802687	0.571502	false	0	ATAD2	719806	0.299754
CAD	cellular amino acid and small molecule metabolic process	-0.845484	0.00392776			5.0466	11684.6	0.0183832	0.198153	0.0476191	7	11	1.11152e-12	false	false	false	13.2857	7	0	0	0.774909	0.684523	false	0	ATP5D	567604	0.318237
NOS3	cellular amino acid and small molecule metabolic process	0.944838	0.271725	2.39036	0.000215953	5.34005	3040.17	0.00480873	0.187264	0.533333	6	13	6.1467e-12			false	13.8333	6	0	0	0.797649	3.14704	false	0	AMPD3	292600	0.189474
KMO	cellular amino acid and small molecule metabolic process	1.17982	0.0123198	2.71993	1.70341e-05	6.85642	0	0	0.145849	1	3	14	1.99377e-16	false	false	false	6	3	0	0	0.778408	0.840002	false	0	ADPGK	2715778	0.22192
HPD	cellular amino acid and small molecule metabolic process	1.76699	0.00107947			6.47985	1324.56	0.0021025	0.154325	0	3	14	7.28108e-15	false	false	false	3.33333	3	0	0	0.802757	0.0739802	false	0	ATP6V0B	843346	0.317568
MTHFD1L	cellular amino acid and small molecule metabolic process	-1.48138	0.0061419			5.53904	2139.1	0.0033851	0.180537	0.355556	14	13	7.95213e-13	false	false	false	9.7	14	0	0	0.802757	0.310357	false	0	ATP6V1A	843346	0.317568
CPS1	cellular amino acid and small molecule metabolic process	1.56371	0.0122464			6.04534	0	0	0.165417	0	1	12	8.72834e-15	false	false	false	7	1	0	0	0.774909	0.45696	false	0	ATP5H	567604	0.318237
MTHFR	cellular amino acid and small molecule metabolic process	0.0653503	0.700727	2.14731	0.0013683	6.00504	0	0	0.166527	1	3	13	1.4634e-14			false	15.6667	3	0	0	0.774909	2.44851	false	0	ATP5L	567604	0.318237
SHMT1	cellular amino acid and small molecule metabolic process	0.947039	0.00166259	2.10914	0.00166905	5.03023	23686.1	0.037541	0.198798	0.233766	23	12	9.93977e-13	false	false	false	8.18182	23	0	0	0.666737	2.44851	false	0	HSD17B6	12342	0.458333
SARDH	cellular amino acid and small molecule metabolic process	0.774842	0.00609627			5.44332	2057.67	0.00325657	0.183711	0.527778	9	13	8.0116e-13	false	false	false	11.2222	9	0	0	0.816331	3.72926	false	0	AK4	1939978	0.247417
MTHFS	cellular amino acid and small molecule metabolic process	0.290481	0.474453	2.10914	0.00166905	6.42947	0	0	0.155534	0	1	14	6.45894e-15			false	16	1	0	0	0.816331	2.09431	false	0	AK3	1939978	0.247417
AMT	cellular amino acid and small molecule metabolic process	1.41129	0.00573432			5.53904	1287.16	0.0020376	0.180537	0.4	11	13	7.95289e-13	false	false	false	9.9	11	0	0	0.816261	3.00162	false	0	AK5	1910528	0.259989
DHFR	cellular amino acid and small molecule metabolic process	1.49514	0.0115204			5.89547	68.5091	0.00010881	0.169622	0.571429	7	13	4.56843e-14	false	false	false	12.1429	7	0	0	0.789673	1.60612	false	0	AMPD2	148264	0.211329
ALDH1L2	cellular amino acid and small molecule metabolic process	-1.91474	0.0317405			5.89421	68.5091	0.00010881	0.169658	0.678571	10	13	4.60471e-14	false	false	false	11.625	10	0	0	0.771271	1.43285	false	0	ADK	3737680	0.388889
ALDH1L1	cellular amino acid and small molecule metabolic process	1.49578	0.000786139			5.89421	68.5091	0.00010881	0.169658	0.678571	10	13	4.60471e-14	false	false	false	11.625	10	0	0	0.812483	3.88931	false	0	AK1	903188	0.271605
FTCD	cellular amino acid and small molecule metabolic process	0.581382	0.0527583			5.53526	5319	0.00841717	0.18066	0.428571	8	13	7.94852e-13	false	false	false	11.375	8	0	0	0.812483	0.817113	false	0	AK2	903188	0.271605
DMGDH	cellular amino acid and small molecule metabolic process	0.419522	0.202067	2.14731	0.0013683	5.30479	5596.2	0.00887681	0.188509	0.422222	10	13	8.01405e-13			false	11	10	0	0	0.652953	0.558739	false	0	DYRK1B	0	0.4
MTHFD1	cellular amino acid and small molecule metabolic process	0.491485	0.0503421			5.43073	4518.9	0.00715412	0.184137	0.366667	22	13	8.20365e-13	false	false	false	8.25	22	0	0	0.652953	0.0647825	false	0	DYRK3	0	0.4
MTHFD2L	cellular amino acid and small molecule metabolic process	-0.53598	0.0349016			6.02267	0	0	0.166039	1	4	13	2.05482e-14	false	false	false	16	4	0	0	0.652953	3.88931	false	0	TESK2	0	0.4
MTHFD2	cellular amino acid and small molecule metabolic process	-1.02425	0.0237617	2.43362	0.000170083	6.02141	0.25	4e-07	0.166074	0.833333	5	13	2.68095e-14	false	false	false	14.5	5	0	0	0.77169	0.351926	false	0	ADH5	0	0.592593
YARS2	cellular amino acid and small molecule metabolic process	-0.430251	0.0217881			5.65743	0	0	0.176759	1	4	13	3.12737e-13	false	false	false	14	4	0	0	0.652953	0.161449	false	0	TESK1	0	0.4
AARS2	cellular amino acid and small molecule metabolic process	0.307427	0.0990752			6.02015	0	0	0.166109	1	4	14	1.23439e-14	false	false	false	7.5	4	0	0	0.652953	3.88931	false	0	CLK3	0	0.4
GLS2	cellular amino acid and small molecule metabolic process	-0.100127	0.671655	3.00624	1.40191e-06	5.32242	477.129	0.0007578	0.187885	0.8	5	13	8.71506e-13	false	false	false	14.8	5	0	0	0.739994	1.7357	false	0	ASPA	0	0.701149
MCCC2	cellular amino acid and small molecule metabolic process	0.797255	0.00268273			5.8539	1633.58	0.00258493	0.170826	0	3	11	2.28451e-15	false	false	false	8	3	0	0	0.703121	3.83296	false	0	HS6ST1	0	0
FARSB	cellular amino acid and small molecule metabolic process	-0.381572	0.0338185	2.29047	0.000496295	5.66121	0	0	0.176641	1	3	13	3.10193e-13	false	false	false	16	3	0	0	0.703191	0.146518	false	0	HS3ST3B1	0	0.666667
PIPOX	cellular amino acid and small molecule metabolic process	1.2011	0.00729235			6.30101	87.3326	0.0001387	0.158705	0	2	14	6.35944e-15	false	false	false	6	2	0	0	0.798839	4.67311	false	0	ADSSL1	2001172	0.324653
PLD2	cellular lipid metabolic process	0.19067	0.307638	2.00416	0.00355361	4.71914	2233.81	0.00354155	0.211903	0.571429	7	13	7.06474e-10			false	11.8571	7	0	0	0.779667	0.745052	false	0	GMPPA	493344	0.25
PLD1	cellular lipid metabolic process	0.133441	0.740049	2.10914	0.00166905	4.71914	2233.81	0.00354155	0.211903	0.571429	7	13	7.06474e-10			false	11.8571	7	0	1	0.799328	5.49639	false	0	GDPGP1	1275928	0.208535
PLD3	cellular lipid metabolic process	0.24757	0.0995245			4.71914	2233.81	0.00354155	0.211903	0.571429	7	13	7.06474e-10	false	false	false	11.8571	7	0	0	0.779667	0.768814	false	0	GMPPB	493344	0.25
DECR2	cellular lipid metabolic process	0.9472	0.000195867			7.60076	0	0	0.131566	1	2	12	3.07791e-17	false	false	false	4	2	0	0	0.798349	1.05388	false	0	PGS1	189098	0.320463
DECR1	cellular lipid metabolic process	0.349614	0.0814407			7.60076	0	0	0.131566	1	2	12	3.07916e-17	false	false	false	4	2	0	0	0.798839	2.25568	false	0	ADSS	2001172	0.324653
ECI2	cellular lipid metabolic process	0.679779	0.000829643			6.60327	4768	0.00754397	0.15144	0.266667	6	11	3.90768e-15	false	false	false	6.33333	6	0	0	0.832214	1.21608	false	0	NME1	2456546	0.169468
PAFAH1B2	cellular lipid metabolic process	-0.0737596	0.572291	2.43362	0.000170083	5.20781	0	0	0.192019	1	3	11	2.79303e-12			false	9.66667	3	0	0	0.832214	0.387951	false	0	NME2	2456546	0.169468
PAFAH1B1	cellular lipid metabolic process	-0.618169	0.00360394			5.20781	0	0	0.192019	1	3	11	2.79303e-12	false	false	false	9.66667	3	0	0	0.832214	0.117312	false	0	NME4	2456546	0.169468
RPE	cellular lipid metabolic process	-0.242902	0.0817462			8.51259	0	0	0.117473	0	1	18	1.20896e-17	false	false	false	4	1	0	0	0.832214	0.715346	false	0	NME6	2456546	0.169468
SGSH	cellular lipid metabolic process	0.351635	0.130272	2.24975	0.000617604	5.98741	0	0	0.167017	0	1	15	2.91503e-12	false	false	false	23	1	0	0	0.832214	5.49639	false	0	NME5	2456546	0.169468
ASRGL1	cellular lipid metabolic process	0.736471	0.015784			5.57053	0	0	0.179516	1	2	12	3.1067e-14	false	false	false	7	2	0	0	0.75084	2.42631	false	0	SLC25A20	0	0
ASPG	cellular lipid metabolic process	2.01952	0.000972947			4.95088	8703.95	0.0135899	0.201984	0.4	5	11	2.80219e-12	false	false	false	7.6	5	0	2	0.79548	1.90541	false	0	SLC7A6	691248	0.141414
ASNS	cellular lipid metabolic process	-1.90617	0.00473382	3.0934	5.28056e-07	5.09824	10752.9	0.0168467	0.196146	0.25	9	12	1.14529e-12	false	false	false	9.66667	9	0	2	0.79639	1.25071	false	0	SLC3A2	1175664	0.101891
NIT1	cellular lipid metabolic process	0.301563	0.0443951	3.1678	1.29799e-07	5.6801	0	0	0.176053	1	3	12	6.68289e-13	false	false	false	20.3333	3	0	0	0.697313	2.44851	false	0	DPYSL2	0	0.75
NIT2	cellular lipid metabolic process	0.645335	0.0205294	2.43362	0.000170083	5.6801	0	0	0.176053	1	3	12	6.68289e-13	false	false	false	20.3333	3	0	0	0.831304	0.616747	false	0	CMPK2	6043616	0.174845
ADPGK	cellular lipid metabolic process	-0.669645	0.0319968			4.98866	18466	0.0292189	0.200454	0.142292	23	14	3.70209e-10	false	false	false	10.7391	23	0	0	0.831304	7.25406	false	0	CMPK1	6043616	0.174845
ASPA	cellular lipid metabolic process	1.77433	0.00941085			5.6801	0	0	0.176053	1	3	12	6.68288e-13	false	false	false	20.3333	3	0	0	0.785404	0.0894593	false	0	GPD2	103456	0.293651
PGS1	cellular lipid metabolic process	-0.266559	0.0238889			4.62972	3632.81	0.00575143	0.215996	0.285714	7	13	1.31939e-07	false	false	false	12	7	0	0	0.733767	7.0347	false	0	PADI4	0	0
GPD2	cellular lipid metabolic process	-0.382148	0.0892188			4.86272	6811.7	0.0107906	0.205646	0.2	6	13	4.46387e-08	false	false	false	6.66667	6	0	1	0.752449	3.14704	false	0	SIRT6	13506	0.5
G6PC	cellular lipid metabolic process	1.69132	0.0408351			5.55038	2611.71	0.00413071	0.180168	0.7	5	15	6.35396e-12	false	false	false	10.6	5	0	0	0.758676	0.767265	false	0	RARS	2982	0.49375
G6PC2	cellular lipid metabolic process	-2.74361	0.0605127			5.55038	2611.71	0.00413071	0.180168	0.7	5	15	6.35396e-12	false	false	false	10.6	5	0	1	0.789253	1.20329	false	0	ADPRH	186384	0.227642
G6PC3	cellular lipid metabolic process	-0.270346	0.381716	2.00416	0.00355361	5.55038	2611.71	0.00413071	0.180168	0.7	5	15	6.35396e-12			false	10.6	5	0	0	0.759866	1.82634	false	0	ADPRHL2	0	0.611111
ACY3	cellular lipid metabolic process	0.831106	0.0507733			5.6801	0	0	0.176053	1	3	12	6.68288e-13	false	false	false	20.3333	3	0	0	0.815281	1.89458	false	0	ADPRM	729082	0.199588
DGAT2	cellular lipid metabolic process	0.519962	0.00933149			5.6801	0	0	0.176053	1	3	12	6.68288e-13	false	false	false	20.3333	3	0	0	0.823468	3.14704	false	0	RRM2	3671274	0.187433
ETNK2	cellular lipid metabolic process	0.493252	0.0729458	2.00416	0.00355361	5.07557	1309.32	0.00206981	0.197022	0	2	13	3.00253e-11	false	false	false	7	2	0	0	0.823468	1.78677	false	0	RRM2B	3671274	0.187433
DGAT1	cellular lipid metabolic process	0.0345248	0.848343	2.24975	0.000617604	5.6801	0	0	0.176053	1	3	12	6.68288e-13	false	false	false	20.3333	3	0	0	0.802687	0.951292	false	0	SPATA5	719806	0.299754
CERS5	cellular lipid metabolic process	-1.46226	0.00387097			5.28715	1993.77	0.0031364	0.189138	0.266667	6	12	1.73827e-11	false	false	false	15.5	6	0	0	0.802687	2.44851	false	0	SPAST	719806	0.299754
HGSNAT	cellular lipid metabolic process	-0.92681	0.000431542			6.49496	0	0	0.153965	0	1	15	5.7272e-12	false	false	false	5	1	0	0	0.747201	0.661485	false	0	G6PC	432348	0.271795
FAR1	cellular lipid metabolic process	-1.62234	0.0409849			4.74433	8449.33	0.0133684	0.210778	0.247619	15	12	6.7907e-12	false	false	false	9.33333	15	0	0	0.741184	2.77347	false	0	TDO2	30624	0.448276
PECR	cellular lipid metabolic process	0.325553	0.145588	2.00416	0.00355361	5.07935	3664.13	0.00581884	0.196876	0.47619	7	11	6.18256e-12	false	false	false	17.7143	7	0	0	0.741184	1.91537	false	0	IDO2	30624	0.448276
ACOX1	cellular lipid metabolic process	0.60767	0.0123054			5.04156	5458.46	0.00865309	0.198351	0.490909	11	11	6.90057e-12	false	false	false	17.9091	11	0	0	0.77225	7.0347	false	0	ARG2	104058	0.281843
SGMS1	cellular lipid metabolic process	-0.772483	0.00298727			5.01385	897.718	0.00142038	0.199447	0.527778	9	13	7.07335e-10	false	false	false	11.3333	9	0	0	0.759866	3.14704	false	0	PARG	0	0.611111
SAMD8	cellular lipid metabolic process	-0.541243	0.0218004	2.00416	0.00355361	5.01385	897.718	0.00142038	0.199447	0.527778	9	13	7.07335e-10	false	false	false	11.3333	9	0	0	0.747201	0.373616	false	0	G6PC2	432348	0.271795
SGMS2	cellular lipid metabolic process	-1.22845	0.000627503			5.01385	897.718	0.00142038	0.199447	0.527778	9	13	7.07335e-10	false	false	false	11.3333	9	0	0	0.474741	0.743016	false	0	IDI1	0	0
SIAE	cellular lipid metabolic process	0.923364	0.0162407			5.35768	0	0	0.186648	0	1	11	2.74896e-12	false	false	false	21	1	0	0	0.747201	2.44851	false	0	G6PC3	432348	0.271795
LIPA	cellular lipid metabolic process	0.812873	0.0298828			6.02645	0	0	0.165935	1	3	14	5.66696e-12	false	false	false	5.5	3	0	0	0.721942	1.68835	false	0	MOCOS	565334	0.270677
ACOX3	cellular lipid metabolic process	0.691959	0.0145949			5.57053	1281.84	0.00201929	0.179516	0.6	6	11	7.21268e-13	false	false	false	17	6	0	0	0.633921	0.661893	false	0	GCLM	0	0
LIPG	cellular lipid metabolic process	2.16168	0.00110681			6.69899	0	0	0.149276	1	3	14	1.95721e-13	false	false	false	4	3	0	0	0.802687	0.715106	false	0	DDX19B	719806	0.299754
EHHADH	cellular lipid metabolic process	1.82251	0.000158033			5.64484	2397.05	0.00379134	0.177153	0.6	11	10	1.66158e-13	false	false	false	10.1	11	0	0	0.802757	0.00294916	false	0	ATP6V1E1	843346	0.317568
PNPLA2	cellular lipid metabolic process	0.276559	0.0314308	2.00416	0.00355361	6.69899	0	0	0.149276	1	3	14	1.95721e-13	false	false	false	4	3	0	0	0.802757	3.36526	false	0	ATP6V1H	843346	0.317568
ACSS2	cellular lipid metabolic process	1.28332	0.0036921	2.39036	0.000215953	4.35894	82605	0.128029	0.229413	0.0857143	21	10	3.49119e-10	false	false	false	9.52381	21	0	0	0.823468	0.525874	false	0	RRM1	3671274	0.187433
CHDH	cellular lipid metabolic process	0.702614	0.0292103			5.04534	7953.55	0.0125198	0.198203	0.2	6	12	1.67197e-11	false	false	false	6.16667	6	0	0	0.802687	3.88931	false	0	KATNA1	719806	0.299754
CHKA	cellular lipid metabolic process	-0.982157	0.0151475			4.69395	10317	0.0162751	0.21304	0.2	6	12	5.22448e-11	false	false	false	7.33333	6	0	0	0.793031	2.19187	false	0	ENTPD8	231504	0.246682
ACHE	cellular lipid metabolic process	-1.17933	0.280407	2.39036	0.000215953	4.88035	6219.86	0.00966484	0.204903	0	3	11	3.29199e-12	false	false	false	11	3	0	0	0.802687	0.855472	false	0	KLC1	719806	0.299754
ACOT2	cellular lipid metabolic process	-1.94794	0.0502415			5.6461	10.4384	1.658e-05	0.177114	0.8	6	12	1.09789e-13	false	false	false	8	6	0	0	0.739994	0.502053	false	0	ACY3	0	0.701149
ACOT4	cellular lipid metabolic process	0.511163	0.0674038			5.64358	903.511	0.00143012	0.177193	0.533333	7	12	1.09799e-13	false	false	false	6.83333	7	0	0	0.72719	0.434988	false	0	PMM1	9912	0.555556
FADS6	cellular lipid metabolic process	0.387712	0.0102285			5.08312	1626.64	0.00258599	0.196729	0.428571	11	12	6.87204e-12	false	false	false	17.5	11	0	0	0.680451	1.10757	false	0	CLIC1	0	0.5625
FASN	cellular lipid metabolic process	1.63492	0.00212875			5.08438	1533.8	0.00243345	0.196681	0.4	5	12	6.17681e-12	false	false	false	15.8	5	0	0	0.680451	4.67311	false	0	CLCN7	0	0.5625
MLYCD	cellular lipid metabolic process	0.655983	0.00958791			5.51134	383.929	0.00059704	0.181444	0.380952	7	10	2.2836e-13	false	false	false	9.42857	7	0	0	0.680451	0.459978	false	0	CLCN2	0	0.5625
CRLS1	cellular lipid metabolic process	-0.647213	0.00541578			4.87028	1259.08	0.00199353	0.205327	0.333333	3	14	8.73226e-08	false	false	false	18.6667	3	0	0	0.680451	2.33359	false	0	CLCC1	0	0.5625
BAAT	cellular lipid metabolic process	2.24486	0.00758467			4.92821	5765.6	0.00915345	0.202913	0.166667	4	11	3.00421e-12	false	false	false	16.5	4	0	0	0.741044	6.35728	false	0	SOAT1	574820	0.428571
CHPT1	cellular lipid metabolic process	0.334182	0.0414986			4.4534	23101.8	0.0365588	0.224548	0.128205	13	13	8.73646e-08	false	false	false	10.1538	13	0	0	0.739994	1.7419	false	0	DGAT2	0	0.701149
ACACA	cellular lipid metabolic process	0.611535	0.0395724			5.37657	2045.14	0.00324185	0.185992	0.321429	8	11	1.58529e-13	false	false	false	7.625	8	0	0	0.77358	2.44851	false	0	ETNK2	148858	0.5
PCYT1A	cellular lipid metabolic process	0.880851	0.0118224			4.38161	13855.6	0.0219348	0.228226	0.327273	11	13	4.51184e-09	false	false	false	18	11	0	0	0.739994	3.72926	false	0	DGAT1	0	0.701149
ACACB	cellular lipid metabolic process	1.05658	0.0269369	2.29047	0.000496295	5.37657	2045.14	0.00324185	0.185992	0.321429	8	11	1.58529e-13	false	false	false	7.625	8	0	0	0.761825	2.3859	false	0	CERS5	45890	0.383333
SLC33A1	cellular lipid metabolic process	0.378174	0.0889804			4.79597	900.739	0.00141962	0.208508	0.6	6	10	5.69767e-12	false	false	false	15.5	6	0	0	0.788273	1.64001	false	0	SLC16A7	891446	0.246429
GK	cellular lipid metabolic process	0.931211	0.0090194			5.01889	4789.05	0.00758581	0.199247	0	6	13	2.42998e-09	false	false	false	6.16667	6	0	0	0.788273	7.25406	false	0	SLC16A8	891446	0.246429
MGLL	cellular lipid metabolic process	1.48967	0.000809483			6.01763	0	0	0.166178	0	1	14	1.91337e-11	false	false	false	6	1	0	0	0.709488	3.15978	false	0	NMRK1	88952	0.619048
PIGL	cellular lipid metabolic process	-0.151517	0.455282	2.86308	5.00265e-06	4.67758	28693.9	0.0445795	0.213786	0	2	11	4.35398e-08			false	13	2	0	0	0.679681	3.00162	false	0	PDE3A	0	0.666667
PGLS	cellular lipid metabolic process	-0.238199	0.0428063			7.51637	0	0	0.133043	1	2	17	1.5359e-15	false	false	false	5.5	2	0	0	0.679681	3.14704	false	0	PDE4A	0	0.666667
H6PD	cellular lipid metabolic process	0.68566	0.0806912	2.29047	0.000496295	6.52141	6822.42	0.0107926	0.153341	0.190476	7	16	1.93514e-13	false	false	false	4.14286	7	0	0	0.679681	1.34699	false	0	PDE4C	0	0.666667
PGD	cellular lipid metabolic process	0.232207	0.113526	2.00416	0.00355361	7.51385	3182	0.00503461	0.133087	0.166667	4	17	1.53616e-15	false	false	false	2.75	4	0	0	0.679681	2.75905	false	0	PDE4B	0	0.666667
IDNK	cellular lipid metabolic process	0.662441	0.00129383			8.51259	0	0	0.117473	0	1	18	1.20896e-17	false	false	false	4	1	0	0	0.679681	3.00162	false	0	PDE1B	0	0.666667
GPCPD1	cellular lipid metabolic process	-0.397472	0.106215	2.00416	0.00355361	4.62972	1244.46	0.00196324	0.215996	0.6	6	12	4.56439e-08	false	false	false	9.16667	6	0	0	0.679681	0.939406	false	0	PDE6B	0	0.666667
CDIPT	cellular lipid metabolic process	-0.234675	0.110971	2.00416	0.00355361	4.22544	185351	0.293064	0.236662	0.0714286	8	13	0.00069636	false	false	false	26.125	8	0	0	0.680381	3.00162	false	0	CFTR	0	0
ELOVL1	cellular lipid metabolic process	-0.396887	0.0147398			5	844.45	0.00134116	0.2	0.6	6	12	6.28455e-12	false	false	false	16.6667	6	0	0	0.735866	3.14704	false	0	CLCN6	838950	0.292411
SCP2	cellular lipid metabolic process	0.991514	0.00595277			5.02267	9426.52	0.0149158	0.199097	0.294118	19	10	3.02473e-13	false	false	false	9.35294	19	0	0	0.709628	3.00162	false	0	NAGPA	1490	0.52381
BCKDHA	cellular lipid metabolic process	0.491381	0.0845555			5.05542	2447.49	0.00378984	0.197808	0.733333	6	10	1.07073e-13	false	false	false	11.6667	6	0	0	0.718164	0.899093	false	0	RBP4	32390	0.45
PGM2	cellular lipid metabolic process	-0.811087	0.0460284			5.07557	8479.36	0.0134778	0.197022	0.179487	14	14	4.23843e-10	false	false	false	7.92308	14	0	0	0.745942	4.81875	false	0	NAGK	30798	0.333333
LRAT	cellular lipid metabolic process	-1.05732	0.0493846	2.53097	7.1555e-05	5.0869	1294.14	0.00203887	0.196583	0.2	5	13	6.94903e-10	false	false	false	13	5	0	0	0.694724	3.99164	false	0	HGSNAT	0	0
LYPLA2	cellular lipid metabolic process	0.0354248	0.753004	2.10914	0.00166905	5.34383	67.6134	0.00010611	0.187132	0.666667	4	12	6.18338e-12			false	16.75	4	0	0	0.791982	0.658804	false	0	FAR1	252082	0.17037
PNPLA6	cellular lipid metabolic process	0.716354	0.0285506			5.34383	67.6134	0.00010611	0.187132	0.666667	4	12	6.18338e-12	false	false	false	16.75	4	0	0	0.670305	0.161209	false	0	KCNE4	0	0.830303
LIPE	cellular lipid metabolic process	1.37844	0.00119638			5.70151	4070.8	0.00644308	0.175392	0.133333	9	13	2.46609e-11	false	false	false	3.83333	9	0	0	0.793171	1.16984	false	0	DOLK	128074	0.563265
SDS	cellular lipid metabolic process	1.22054	0.0190219			5.10327	7227.93	0.0112669	0.195953	0.2	5	11	1.49612e-12	false	false	false	14.8	5	0	0	0.77337	2.44851	false	0	PECR	785848	0.322078
FAAH	cellular lipid metabolic process	0.988698	0.00581658	2.14731	0.0013683	5.01259	2758.19	0.00436395	0.199497	0.4	6	12	4.12854e-12	false	false	false	16.8333	6	0	0	0.670305	4.49834	false	0	KCNG4	0	0.830303
ISYNA1	cellular lipid metabolic process	0.0127017	0.944572	2.14731	0.0013683	5.4471	6635.02	0.0105409	0.183584	0	3	15	4.32292e-08			false	8.33333	3	0	0	0.775469	1.53942	false	0	ACOX1	1187146	0.263369
IMPA2	cellular lipid metabolic process	0.783018	0.0361797	2.57677	5.52268e-05	5.08564	9840.8	0.0156248	0.196632	0.166667	4	14	5.48935e-06	false	false	false	8.75	4	0	0	0.670305	4.67311	false	0	KCNAB3	0	0.830303
ABHD5	cellular lipid metabolic process	0.649727	0.00843321			4.7733	0	0	0.209499	1	9	12	3.76615e-10	false	false	false	17.1111	9	0	0	0.670305	4.67311	false	0	KCNAB1	0	0.830303
GPAT2	cellular lipid metabolic process	-0.195817	0.61706	2.81218	6.75087e-06	4.29975	34350.9	0.0544639	0.232572	0.428571	14	12	4.46638e-08			false	13.0714	14	0	0	0.582004	1.8397	false	0	HAL	0	0
LCLAT1	cellular lipid metabolic process	-0.348475	0.0124562			4.7733	0	0	0.209499	1	9	12	3.76615e-10	false	false	false	17.1111	9	0	0	0.734537	1.14916	false	0	HAO1	20770	0.5
MBOAT1	cellular lipid metabolic process	-1.14782	0.09374			4.7733	0	0	0.209499	1	9	12	3.76615e-10	false	false	false	17.1111	9	0	0	0.777008	2.57557	false	0	SGMS1	71408	0.365591
AGPAT2	cellular lipid metabolic process	0.697309	0.00226625			4.7733	0	0	0.209499	1	9	12	3.76615e-10	false	false	false	17.1111	9	0	0	0.777008	2.44851	false	0	SAMD8	71408	0.365591
AGPAT5	cellular lipid metabolic process	-0.415991	0.0255222			4.7733	0	0	0.209499	1	9	12	3.76615e-10	false	false	false	17.1111	9	0	0	0.777008	3.71762	false	0	SGMS2	71408	0.365591
LPCAT4	cellular lipid metabolic process	-1.7482	0.0353572	3.00624	1.40191e-06	4.68514	4605.36	0.00729295	0.213441	0.311688	23	12	4.37904e-10	false	false	false	12.7727	23	0	0	0.74965	0.832927	false	0	ALPL	0	0.466667
PLA2G12A	cellular lipid metabolic process	-0.55417	0.0230354			4.7267	2609.26	0.00412581	0.211564	0.821429	8	12	7.09821e-10	false	false	false	20.375	8	0	0	0.757907	1.33632	false	0	SIAE	0	0
LCAT	cellular lipid metabolic process	1.15144	0.000363762	2.00416	0.00355361	5.06045	2821.7	0.00446957	0.197611	0.2	9	13	6.95044e-10	false	false	false	13	9	0	0	0.804576	3.14704	false	0	UAP1	1557038	0.244792
LPCAT3	cellular lipid metabolic process	0.578148	0.010937			4.68514	4605.36	0.00729295	0.213441	0.311688	23	12	4.37904e-10	false	false	false	12.7727	23	0	1	0.720753	0.890031	false	0	LIPA	0	0.611111
PLA2G3	cellular lipid metabolic process	-3.53268	0.0120176			4.7267	2609.26	0.00412581	0.211564	0.821429	8	12	7.09821e-10	false	false	false	20.375	8	0	0	0.74965	0.828975	false	0	ACP2	0	0.466667
PLA2G4F	cellular lipid metabolic process	-0.757758	0.377589	2.24975	0.000617604	4.7267	2609.26	0.00412581	0.211564	0.821429	8	12	7.09821e-10			false	20.375	8	0	0	0.74965	3.72926	false	0	ACPP	0	0.466667
GDE1	cellular lipid metabolic process	0.2999	0.0465849			4.37783	46752.5	0.0740211	0.228423	0.428571	7	12	5.48595e-06	false	false	false	8.85714	7	0	0	0.804996	3.14704	false	0	AKR1A1	502986	0.178788
PI4K2B	cellular lipid metabolic process	-0.488726	0.0151618			5.15365	5455.08	0.00865015	0.194037	0.428571	7	14	5.6303e-06	false	false	false	10.2857	7	0	0	0.746082	1.41453	false	0	ACOX3	381060	0.404762
FIG4	cellular lipid metabolic process	0.0484828	0.745199	2.29047	0.000496295	6.07053	0	0	0.16473	1	2	14	5.53204e-06			false	12.5	2	0	1	0.683389	3.30227	false	0	LIPG	0	0.666667
MTMR14	cellular lipid metabolic process	0.490778	0.00926339			5.26196	7838.79	0.0122935	0.190043	0.142857	7	13	5.71471e-06	false	false	false	9.71429	7	0	1	0.741954	4.72689	false	0	EHHADH	645850	0.306061
AGPS	cellular lipid metabolic process	-0.215908	0.119506	2.10914	0.00166905	5.74307	0	0	0.174123	0	1	13	5.34704e-14	false	false	false	15	1	0	1	0.683389	2.44851	false	0	PNPLA2	0	0.666667
MCEE	cellular lipid metabolic process	1.06617	0.000817436			5.61713	748.716	0.00118403	0.178027	0	3	11	5.54735e-14	false	false	false	7	3	0	0	0.813392	0.767265	false	0	ACSS2	2753944	0.125483
DBT	cellular lipid metabolic process	0.521965	0.0170544			5.05542	2447.49	0.00378984	0.197808	0.733333	6	10	1.07073e-13	false	false	false	11.6667	6	0	0	0.775259	0.906691	false	0	CHDH	336036	0.314815
MUT	cellular lipid metabolic process	0.513105	0.00205881			6.31108	15.3893	2.444e-05	0.158451	0	2	12	1.30127e-15	false	false	false	4.5	2	0	0	0.708158	5.49639	false	0	MGEA5	793690	0.32069
CRAT	cellular lipid metabolic process	0.398817	0.0479032			5.74937	1	1.59e-06	0.173932	0.333333	3	13	1.597e-13	false	false	false	6	3	0	0	0.79478	1.38733	false	0	CHKA	532538	0.273333
BBOX1	cellular lipid metabolic process	2.31688	0.00199777			5.09824	372.372	0.0005919	0.196146	0.166667	4	12	3.00825e-12	false	false	false	8	4	0	0	0.707459	2.44851	false	0	NCOA3	0	0.503448
CPT1A	cellular lipid metabolic process	1.06059	0.00106674	2.14731	0.0013683	4.75441	6123.33	0.00977119	0.210331	0.428571	7	12	7.79891e-12	false	false	false	17.1429	7	0	0	0.730199	0.726028	false	0	ACLY	303408	0.705882
CPT1C	cellular lipid metabolic process	-0.633252	0.416307	2.39036	0.000215953	4.75441	6123.33	0.00977119	0.210331	0.428571	7	12	7.79891e-12	false	false	false	17.1429	7	0	0	0.761615	3.5834	false	0	HDAC5	495772	0.281465
HADH	cellular lipid metabolic process	0.882751	0.00381084	2.00416	0.00355361	5.4937	2135.92	0.00327542	0.182027	0.571429	8	10	1.00645e-13	false	false	false	12.75	8	0	0	0.735586	0.056516	false	0	SPHK1	20958	0.333333
ACAA2	cellular lipid metabolic process	0.966199	0.0112645			5.28086	4782.48	0.00751899	0.189363	0.362637	14	10	2.99264e-13	false	false	false	10.3571	14	0	0	0.761615	0.855472	false	0	HDAC4	495772	0.281465
PCCA	cellular lipid metabolic process	0.840392	0.00463561			5.09572	7785.63	0.0121193	0.196243	0.422222	10	10	1.01167e-13	false	false	false	10.5	10	0	0	0.742513	-1.5165	false	0	ASAH2	137988	0.348214
ECHS1	cellular lipid metabolic process	0.645071	0.00013227	2.86308	5.00265e-06	5.74433	5699.01	0.00900593	0.174085	0.381818	12	10	1.63813e-13	false	false	false	7.81818	12	0	0	0.761615	1.30318	false	0	HDAC6	495772	0.281465
ECHDC1	cellular lipid metabolic process	0.29714	0.0884634			5.48237	0	0	0.182403	1	4	10	9.44524e-14	false	false	false	14.75	4	0	0	0.735586	0.677327	false	0	SPHK2	20958	0.333333
ACOT7	cellular lipid metabolic process	-0.410389	0.094234			5.38539	982.435	0.00153863	0.185688	0.466667	6	11	6.08015e-14	false	false	false	10.3333	6	0	0	0.687028	0.733121	false	0	ACER3	0	0
SLC27A2	cellular lipid metabolic process	1.14802	0.0106801			4.28589	37712.5	0.0598391	0.233324	0.208995	28	12	3.80898e-10	false	false	false	11.9643	28	0	0	0.707459	1.71144	false	0	KAT2B	0	0.503448
HSD17B4	cellular lipid metabolic process	0.428862	0.0132143			5.63224	9602.09	0.0151844	0.177549	0.424242	12	10	1.66171e-13	false	false	false	9	12	0	0	0.707459	3.14704	false	0	KAT2A	0	0.503448
AMACR	cellular lipid metabolic process	0.99624	0.000736986			5.23048	0	0	0.191187	1	2	12	3.04849e-12	false	false	false	18.5	2	0	0	0.784425	4.49834	false	0	ACHE	291440	0.384615
ACSL1	cellular lipid metabolic process	0.58261	0.00310703			4.29219	31895.3	0.0505704	0.232981	0.207661	32	11	4.0319e-10	false	false	false	12.0625	32	0	1	0.741884	0.50976	false	0	ACOT2	166	0.363636
ACOX2	cellular lipid metabolic process	0.455088	0.0746483			5.07683	3800.24	0.0060321	0.196973	0.5	9	11	6.2609e-12	false	false	false	15.2222	9	0	1	0.742024	0.370581	false	0	ACOT4	12410	0.30303
ACAT1	cellular lipid metabolic process	0.763831	0.00228473			4.61083	16622.4	0.0251028	0.216881	0.35	18	9	5.79608e-12	false	false	false	10.375	18	0	3	0.77316	1.67472	false	0	FADS6	25948	0.3125
ACAT2	cellular lipid metabolic process	1.04479	0.0153183			4.61083	16622.4	0.0251028	0.216881	0.35	18	9	5.79608e-12	false	false	false	10.375	18	0	0	0.785474	3.20884	false	0	PCK1	1372644	0.346191
ACOT1	cellular lipid metabolic process	2.54747	0.00673243			5.6461	10.4384	1.658e-05	0.177114	0.8	6	12	1.09789e-13	false	false	false	8	6	0	0	0.785474	0.566525	false	0	PCK2	1372644	0.346191
ACSM3	cellular lipid metabolic process	2.16759	0.00118339			4.68388	20199.8	0.0318984	0.213498	0.172414	29	11	4.21023e-11	false	false	false	10.9655	29	0	0	0.77309	2.82356	false	0	FASN	76624	0.385366
ACSM5	cellular lipid metabolic process	1.71195	0.00663207			4.68388	20199.8	0.0318984	0.213498	0.172414	29	11	4.21023e-11	false	false	false	10.9655	29	0	0	0.74937	1.72205	false	0	MLYCD	16230	0.409938
SMPD2	cellular lipid metabolic process	0.479551	0.0903605			5.16877	1227.65	0.00194765	0.19347	0.666667	7	14	5.30818e-11	false	false	false	8.57143	7	0	0	0.670305	3.14704	false	0	KCNK5	0	0.830303
SMPD1	cellular lipid metabolic process	0.680347	0.000521108			5.16877	1227.65	0.00194765	0.19347	0.666667	7	14	5.30818e-11	false	false	false	8.57143	7	0	0	0.784985	2.14011	false	0	CRLS1	88072	0.632184
SMPD3	cellular lipid metabolic process	1.42613	0.05076			5.16877	1227.65	0.00194765	0.19347	0.666667	7	14	5.30818e-11	false	false	false	8.57143	7	0	0	0.781766	1.99496	false	0	BAAT	188736	0.340426
EXT1	cellular lipid metabolic process	0.323457	0.0879427			5.49622	11103.7	0.0175685	0.181943	0	5	14	7.27356e-10	false	false	false	7.4	5	0	0	0.670305	3.88931	false	0	KCNJ8	0	0.830303
GCAT	cellular lipid metabolic process	0.662956	0.00648275			4.79597	900.739	0.00141962	0.208508	0.6	6	10	5.69767e-12	false	false	false	15.5	6	0	0	0.808144	0.649689	false	0	CHPT1	2224708	0.204082
ECH1	cellular lipid metabolic process	0.92984	0.00190092	2.00416	0.00355361	7.60202	0	0	0.131544	0	1	12	3.07711e-17	false	false	false	6	1	0	0	0.756857	0.684475	false	0	ACACA	135992	0.254167
PCYT2	cellular lipid metabolic process	1.48301	0.00294879			4.57557	8123.61	0.0128261	0.218552	0.535714	8	14	3.80909e-09	false	false	false	21	8	0	0	0.812133	1.56872	false	0	PCYT1A	723566	0.342657
CROT	cellular lipid metabolic process	0.577393	0.0179119			4.85264	2387.81	0.00380631	0.206073	0	4	12	4.68484e-12	false	false	false	17.5	4	0	0	0.756857	3.88931	true	0	ACACB	135992	0.254167
ELOVL6	cellular lipid metabolic process	0.652586	0.0082679			4.95466	3716.83	0.00590044	0.20183	0.388889	9	12	6.94283e-12	false	false	false	17.5556	9	0	0	0.707459	2.44851	false	0	GTF3C4	0	0.503448
NAGS	cellular lipid metabolic process	1.18757	0.00457804			4.79597	900.739	0.00141962	0.208508	0.6	6	10	5.69767e-12	false	false	false	15.5	6	0	0	0.707459	-1.23795	false	0	EP300	0	0.503448
MCAT	cellular lipid metabolic process	-0.448569	0.00422396			5.86146	0	0	0.170606	1	3	12	5.11307e-14	false	false	false	7	3	0	0	0.670305	0.226612	false	0	KCNQ4	0	0.830303
ALOX12	cellular lipid metabolic process	0.585489	0.48497	3.51523	8.40117e-09	6.01134	0	0	0.166352	0	1	13	3.25083e-14			false	6	1	0	0	0.761615	0.690258	false	0	HDAC11	495772	0.281465
HADHA	cellular lipid metabolic process	0.257985	0.0859839			6.74307	0	0	0.1483	0	1	11	1.28976e-15	false	false	false	11	1	0	0	0.693605	0.064197	false	0	ASAH1	0	0.6
KMT2A	chromatin organization	-0.324642	0.0753657			6.27708	0	0	0.15931	1	11	12	9.42274e-14	false	false	false	13.9091	11	0	0	0.670305	0.927095	false	0	KCNN1	0	0.830303
KMT2C	chromatin organization	0.356295	0.00626426			6.27708	0	0	0.15931	1	11	12	9.42274e-14	false	false	false	13.9091	11	0	0	0.707459	1.20897	false	0	CDYL	0	0.503448
KMT2E	chromatin organization	0.452041	0.0190352			6.27708	0	0	0.15931	1	11	12	9.42274e-14	false	false	false	13.9091	11	0	0	0.789113	0.0914172	false	0	SLC33A1	41736	0.303922
ASH1L	chromatin organization	-0.430282	0.0153357			6.27708	0	0	0.15931	1	11	12	9.42274e-14	false	false	false	13.9091	11	0	0	0.739575	4.49834	false	0	VRK3	0	0.977105
DOT1L	chromatin organization	-0.779969	0.0407518			6.27708	0	0	0.15931	1	11	12	9.42274e-14	false	false	false	13.9091	11	0	0	0.739575	1.09457	false	0	VRK2	0	0.977105
SETD7	chromatin organization	-1.15568	0.0136864			6.27708	0	0	0.15931	1	11	12	9.42273e-14	false	false	false	13.9091	11	0	0	0.739575	2.11002	false	0	WNK1	0	0.977105
PRDM9	chromatin organization	-0.521305	0.0549991			6.27708	0	0	0.15931	1	11	12	9.42273e-14	false	false	false	13.9091	11	0	0	0.739575	4.67311	false	0	WNK4	0	0.977105
SETD1B	chromatin organization	-0.0907701	0.528232	2.29047	0.000496295	6.27708	0	0	0.15931	1	11	12	9.42274e-14			false	13.9091	11	0	0	0.739575	2.26248	false	0	ULK1	0	0.977105
PADI4	chromatin organization	-1.69566	0.222844	2.81218	6.75087e-06	5.79219	0	0	0.172646	0	1	14	5.53131e-12	false	false	false	9	1	0	0	0.739575	5.49639	false	0	ULK2	0	0.977105
SIRT6	chromatin organization	0.871784	0.00476881	2.14731	0.0013683	5.45592	958.414	0.00142758	0.183287	0	3	14	1.17971e-11	false	false	false	12	3	0	0	0.739575	1.41795	false	0	VRK1	0	0.977105
ADPRH	chromatin organization	-0.462369	0.019478			4.79345	12188.1	0.019281	0.208618	0.277778	10	13	7.02489e-10	false	false	false	9.66667	10	0	0	0.685908	0.273047	false	0	AASS	0	0
NCOA3	chromatin organization	0.172973	0.201862	2.00416	0.00355361	6.26574	0	0	0.159598	1	10	12	9.34497e-14			false	14.6	10	0	0	0.741394	1.26765	false	0	ALDH7A1	120432	0.25
HDAC5	chromatin organization	1.05	0.000753803			5.29093	10056	0.0153151	0.189003	0.584795	19	11	2.82682e-12	false	false	false	12.9474	19	0	0	0.721103	1.38151	false	0	AARS	0	0.46875
HDAC4	chromatin organization	-0.363555	0.0833103	2.43362	0.000170083	5.29093	10056	0.0153151	0.189003	0.584795	19	11	2.82682e-12	false	false	false	12.9474	19	0	0	0.739575	0.161209	false	0	STK3	0	0.977105
HDAC6	chromatin organization	0.796693	0.0169932			5.29093	10056	0.0153151	0.189003	0.584795	19	11	2.82682e-12	false	false	false	12.9474	19	0	0	0.739575	1.86444	false	0	STK4	0	0.977105
KAT2B	chromatin organization	0.733013	0.0012662			6.26574	0	0	0.159598	1	10	12	9.34497e-14	false	false	false	14.6	10	0	0	0.739575	0.228832	false	0	STK40	0	0.977105
KAT2A	chromatin organization	-0.273724	0.178516	2.14731	0.0013683	6.26574	0	0	0.159598	1	10	12	9.34497e-14			false	14.6	10	0	0	0.739575	2.55415	false	0	TAOK2	0	0.977105
GTF3C4	chromatin organization	0.189169	0.135265	2.00416	0.00355361	6.26574	0	0	0.159598	1	10	12	9.34497e-14	false	false	false	14.6	10	0	0	0.739575	2.00277	false	0	TAOK1	0	0.977105
EP300	chromatin organization	-0.305871	0.0652565			6.26574	0	0	0.159598	1	10	12	9.34497e-14	false	false	false	14.6	10	0	0	0.739575	0.242337	false	0	STK36	0	0.977105
HDAC11	chromatin organization	0.510984	0.0392609			5.29093	10056	0.0153151	0.189003	0.584795	19	11	2.82682e-12	false	false	false	12.9474	19	0	0	0.739575	5.30681	false	0	STK35	0	0.977105
CDYL	chromatin organization	-1.08722	0.0193275			6.26574	0	0	0.159598	1	10	12	9.34497e-14	false	false	false	14.6	10	0	0	0.739575	0.160376	false	0	TRPM7	0	0.977105
SPHK1	coupled receptor protein signaling pathway	-0.871527	0.240286	2.29047	0.000496295	5.75945	568.854	0.00089964	0.173628	0.5	5	14	2.50902e-13	false	false	false	5	5	0	0	0.739575	4.49834	false	0	TSSK3	0	0.977105
ASAH2	coupled receptor protein signaling pathway	0.0896494	0.800539			5.63476	3157.52	0.00499321	0.17747	0.214286	8	13	1.39493e-12	false	false	false	5.125	8	0	0	0.739575	2.22942	false	0	TTBK1	0	0.977105
SPHK2	coupled receptor protein signaling pathway	0.247292	0.427759	2.39036	0.000215953	5.75945	568.854	0.00089964	0.173628	0.5	5	14	2.50902e-13	false	false	false	5	5	0	0	0.739575	0.584596	false	0	TBK1	0	0.977105
ACER3	coupled receptor protein signaling pathway	-0.383626	0.0370277			6.6335	0	0	0.15075	0	1	14	1.09845e-14	false	false	false	8	1	0	0	0.739575	0.419679	false	0	TAOK3	0	0.977105
ASAH1	coupled receptor protein signaling pathway	-0.297522	0.092352			6.51511	0	0	0.153489	1	3	14	1.49369e-14	false	false	false	6	3	0	0	0.739575	1.61934	false	0	TLK2	0	0.977105
KDSR	coupled receptor protein signaling pathway	0.37648	0.0893368			5.73929	1008.5	0.00159641	0.174237	0.4	5	13	1.5366e-13	false	false	false	6.8	5	0	0	0.739575	2.44851	false	0	TLK1	0	0.977105
SGPL1	coupled receptor protein signaling pathway	-0.407314	0.00871257			4.92695	5615.15	0.00885143	0.202965	0.166667	4	13	3.00502e-11	false	false	false	8.25	4	0	0	0.739575	3.72926	false	0	TNIK	0	0.977105
ADPRHL2	DNA repair	-0.39428	0.00831467			5.32242	0	0	0.187885	1	2	14	7.07124e-10	false	false	false	5.5	2	0	0	0.739575	1.89404	false	0	TRIO	0	0.977105
ADPRM	DNA repair	0.695327	0.0075745			4.32494	19107.8	0.0302548	0.231217	0.111111	9	13	8.90977e-08	false	false	false	11.2222	9	0	0	0.717744	0.740038	false	0	RDH11	8	0.527273
PARG	DNA repair	0.0951674	0.566985	2.14731	0.0013683	5.32242	0	0	0.187885	1	2	14	7.07124e-10			false	5.5	2	0	0	0.717744	1.57312	false	0	DHRS3	8	0.527273
GSTZ1	glutathione metabolic process	1.04503	0.00226755			6.47229	2664.15	0.00416809	0.154505	0.705128	13	12	1.15257e-16	false	false	false	10.9231	13	0	0	0.717954	3.88931	false	0	DHRS4	62048	0.380952
GPX6	glutathione metabolic process	2.87953	0.00945196			6.81738	0	0	0.146684	1	3	14	1.02644e-16			false	8.33333	3	0	0	0.776728	1.76679	false	0	GK	190870	0.246032
GPX7	glutathione metabolic process	-0.425681	0.308215	2.00416	0.00355361	6.81738	0	0	0.146684	1	3	14	1.02644e-16			false	8.33333	3	0	0	0.721243	3.53124	false	0	MGLL	0	0
GPX3	glutathione metabolic process	-1.12885	0.00216345			6.81738	0	0	0.146684	1	3	14	1.0245e-16			false	8.33333	3	0	0	0.717464	0.693731	false	0	ABCA4	0	0.625
GSTT1	glutathione metabolic process	0.487084	0.0460792			6.65491	0	0	0.150265	1	11	13	1.10269e-16	false	false	false	12.6364	11	0	0	0.739575	4.67311	false	0	GAK	0	0.977105
MGST3	glutathione metabolic process	0.91719	0.00530646			6.65491	0	0	0.150265	1	11	13	1.10269e-16	false	false	false	12.6364	11	0	0	0.739575	2.44851	false	0	HIPK1	0	0.977105
GSTM2	glutathione metabolic process	0.529091	0.0727259			6.39043	437.778	0.00069581	0.156484	0.939394	12	13	1.49461e-16	false	false	false	12.8333	12	0	0	0.762594	0.993801	false	0	PGM3	28046	0.5
GSTM4	glutathione metabolic process	0.681993	0.0941297			6.39043	437.778	0.00069581	0.156484	0.939394	12	13	1.49461e-16	false	false	false	12.8333	12	0	0	0.739575	0.0498391	false	0	HIPK2	0	0.977105
GSTP1	glutathione metabolic process	-0.331757	0.272202	2.29047	0.000496295	6.39043	437.778	0.00069581	0.156484	0.939394	12	13	1.49461e-16			false	12.8333	12	0	0	0.703191	0.935369	false	0	GNS	0	0.666667
GSTA2	glutathione metabolic process	2.12462	0.000138856			6.39043	437.778	0.00069581	0.156484	0.939394	12	13	1.49461e-16	false	false	false	12.8333	12	0	0	0.739575	2.1369	false	0	DCLK3	0	0.977105
GSTA4	glutathione metabolic process	1.18482	0.00148337			6.39043	437.778	0.00069581	0.156484	0.939394	12	13	1.49461e-16	false	false	false	12.8333	12	0	0	0.739575	0.939406	false	0	EIF2AK2	0	0.977105
GSTA3	glutathione metabolic process	1.13534	0.00470995			6.39043	437.778	0.00069581	0.156484	0.939394	12	13	1.49461e-16	false	false	false	12.8333	12	0	0	0.739575	3.14704	false	0	EIF2AK1	0	0.977105
GSTK1	glutathione metabolic process	0.943594	0.0149924			6.39043	437.778	0.00069581	0.156484	0.939394	12	13	1.49461e-16	false	false	false	12.8333	12	0	0	0.739575	3.14704	false	0	EIF2AK4	0	0.977105
MGST1	glutathione metabolic process	0.821672	0.0178592			6.39043	437.778	0.00069581	0.156484	0.939394	12	13	1.49461e-16	false	false	false	12.8333	12	0	0	0.739575	0.0366729	false	0	EIF2AK3	0	0.977105
GLO1	glutathione metabolic process	0.311117	0.02842			5.7267	4072.34	0.0064449	0.174621	0	3	12	1.13335e-13	false	false	false	13	3	0	0	0.739575	0.0138679	false	0	ERN1	0	0.977105
HAGH	glutathione metabolic process	0.170883	0.219864	2.43362	0.000170083	5.82116	18274.6	0.0289296	0.171787	0.345029	20	13	1.26157e-14			false	8.05263	20	0	0	0.739575	3.72926	false	0	LMTK2	0	0.977105
CMPK2	glycosylation	1.35536	0.043409			4.03652	69582.7	0.110139	0.247738	0.29	25	14	5.54378e-06	false	false	false	16.96	25	0	0	0.739575	0.136831	false	0	LIMK2	0	0.977105
CMPK1	glycosylation	-0.249856	0.0719483	2.86308	5.00265e-06	4.03652	69582.7	0.110139	0.247738	0.29	25	14	5.54378e-06	false	false	false	16.96	25	0	0	0.739575	0.222696	false	0	MAP3K10	0	0.977105
NAGPA	glycosylation	0.134077	0.341567	2.10914	0.00166905	6.2267	128.188	0.00020095	0.160599	0.333333	3	13	1.11364e-11			false	4	3	0	0	0.739575	3.00162	false	0	LRRK2	0	0.977105
HEXA	glycosylation	0.380921	0.0309515			5.3199	2395.67	0.00378333	0.187973	0.166667	4	12	3.57189e-10	false	false	false	6.75	4	0	0	0.739575	3.14704	false	0	MAP3K12	0	0.977105
B4GALT3	glycosylation	-0.516352	0.0177044	2.00416	0.00355361	5.53149	2342.7	0.00370006	0.180783	0.2	5	13	1.39454e-09	false	false	false	3.8	5	0	0	0.739575	1.67643	false	0	IRAK1	0	0.977105
ST6GALNAC6	glycosylation	1.01222	0.00126201			5.02393	0	0	0.199047	1	4	15	8.80075e-08	false	false	false	18.6667	4	0	0	0.739575	0.0376727	false	0	IRAK4	0	0.977105
ST8SIA3	glycosylation	-0.727217	0.34123	2.39036	0.000215953	5.02267	0	0	0.199097	1	4	15	8.87114e-08			false	15.25	4	0	0	0.758606	3.14704	false	0	NDST2	100096	0.194444
ST6GAL1	glycosylation	-0.153483	0.600851	2.29047	0.000496295	4.96096	1485.89	0.00235341	0.201574	0.333333	3	14	8.73145e-08			false	18.3333	3	0	0	0.739575	0.661547	false	0	KALRN	0	0.977105
ST3GAL1	glycosylation	-0.137386	0.734043	2.43362	0.000170083	5.03275	0	0	0.198699	1	3	15	8.80074e-08			false	18.3333	3	0	0	0.703191	3.72926	false	0	SULF2	0	0.666667
ST3GAL3	glycosylation	1.81284	0.00124952	3.14939	3.7563e-07	4.95718	1543.37	0.00244444	0.201728	0.533333	7	14	8.94099e-08	false	false	false	11.1667	7	0	0	0.739575	0.0735669	false	0	CDK8	0	0.977105
ST3GAL4	glycosylation	0.758315	0.0167713			5.02141	3.44848	5.48e-06	0.199147	0.8	5	15	8.9399e-08	false	false	false	12.6	5	0	0	0.739575	2.44851	false	0	CDKL2	0	0.977105
B4GALT5	glycosylation	-0.490181	0.0136352	2.43362	0.000170083	6.0806	84.5969	0.00013436	0.164457	0.666667	3	13	1.38808e-11	false	false	false	4	3	0	0	0.739575	1.69468	false	0	CDK9	0	0.977105
ALPL	hydrogen peroxide catabolic process dephosphorylation	-1.16645	0.0323076			5.5063	0	0	0.18161	1	3	12	3.5159e-10			false	7	3	0	0	0.739575	1.00314	false	0	CDKL5	0	0.977105
ACP2	hydrogen peroxide catabolic process dephosphorylation	0.293781	0.0324826			5.5063	0	0	0.18161	1	3	12	3.5159e-10			false	7	3	0	0	0.739575	0.766458	false	0	CHEK2	0	0.977105
ACPP	hydrogen peroxide catabolic process dephosphorylation	1.38489	0.0720809	2.24975	0.000617604	5.5063	0	0	0.18161	1	3	12	3.5159e-10			false	7	3	0	0	0.739575	2.44851	false	0	CDC42BPA	0	0.977105
AKR1A1	hydrogen peroxide catabolic process dephosphorylation	0.143682	0.312249	2.14731	0.0013683	4.51008	30253.2	0.0476824	0.221726	0.161905	15	11	4.39488e-08			false	8	15	0	0	0.739575	0.595988	false	0	CASK	0	0.977105
PRDX1	hydrogen peroxide catabolic process dephosphorylation	0.439918	0.00742498			5.50756	0	0	0.181569	1	2	12	3.488e-10			false	8.5	2	0	0	0.739575	2.44851	false	0	CDC42BPB	0	0.977105
PRDX2	hydrogen peroxide catabolic process dephosphorylation	0.338485	0.0292884			5.50756	0	0	0.181569	1	2	12	3.488e-10			false	8.5	2	0	0	0.739575	3.14704	false	0	CDC7	0	0.977105
SLC24A3	ion transport	-2.76626	0.0318902			4.97229	17705.1	0.0280141	0.201114	0.126437	56	12	2.62513e-13	false	false	false	9.66667	56	0	0	0.739575	-0.106632	false	0	CDK1	0	0.977105
SLC8A2	ion transport	-1.8772	0.134881	2.10914	0.00166905	4.97229	17705.1	0.0280141	0.201114	0.126437	56	12	2.62513e-13	false	false	false	9.66667	56	0	0	0.739575	0.557656	false	0	DAPK1	0	0.977105
ATP2B2	ion transport	3.0715	0.00302816	2.53097	7.1555e-05	5.96851	0	0	0.167546	1	5	13	4.17926e-15	false	false	false	21	5	0	0	0.739575	-2.96083	false	0	CSNK2A2	0	0.977105
ATP2B4	ion transport	0.533785	0.334214	2.53097	7.1555e-05	5.96851	0	0	0.167546	1	5	13	4.17926e-15	false	false	false	21	5	0	0	0.739575	0.688232	false	0	DAPK2	0	0.977105
ATP2A2	ion transport	-0.887268	0.00498332	2.29047	0.000496295	5.94207	5233.33	0.00827984	0.168292	0.78022	14	13	4.24009e-15	false	false	false	14.8571	14	0	0	0.697803	3.64133	false	0	GNMT	2	0.5625
ATP2A1	ion transport	0.050588	0.943506	2.39036	0.000215953	5.94207	5233.33	0.00827984	0.168292	0.78022	14	13	4.24009e-15	false	false	false	14.8571	14	0	0	0.739575	0.0497258	false	0	DCLK2	0	0.977105
ATP2C1	ion transport	-0.118457	0.270682	2.24975	0.000617604	5.94207	5233.33	0.00827984	0.168292	0.78022	14	13	4.24009e-15			false	14.8571	14	0	0	0.74937	2.74256	false	0	GNE	63894	0.533333
SLC9A5	ion transport	-1.54535	0.0244941	2.43362	0.000170083	5.92821	22.6667	3.6e-05	0.168685	0.619048	13	13	1.26914e-14	false	false	false	27.2857	13	0	0	0.739575	0.994521	false	0	CSNK1A1	0	0.977105
SLC9A8	ion transport	-0.663346	0.00678617			5.92821	22.6667	3.6e-05	0.168685	0.619048	13	13	1.26914e-14	false	false	false	27.2857	13	0	0	0.739575	-0.777356	false	0	CSNK1E	0	0.977105
SLC44A1	ion transport	0.200271	0.148297	2.00416	0.00355361	5.22544	13224.2	0.0209052	0.191371	0.194444	15	13	5.55704e-13			false	23.5556	15	0	0	0.739575	1.3879	false	0	CSNK1G2	0	0.977105
SLC4A11	ion transport	-1.17443	0.215475	3.14939	3.7563e-07	5.92947	22.6667	3.6e-05	0.168649	0.466667	12	13	1.26038e-14	false	false	false	30.6667	12	0	0	0.739924	0.812308	false	0	GLA	125832	0.433333
SLC4A5	ion transport	0.170152	0.842805	2.29047	0.000496295	5.28086	12227.8	0.0191832	0.189363	0.145455	17	11	2.465e-14	false	false	false	20	17	0	0	0.739575	3.00162	false	0	AAK1	0	0.977105
SLC6A6	ion transport	-0.586931	0.00225754	2.29047	0.000496295	5.28715	5121.64	0.00813662	0.189138	0.333333	13	12	3.62361e-14	false	false	false	26.8571	13	0	0	0.739575	4.74841	false	0	AATK	0	0.977105
SLC6A9	ion transport	-0.224418	0.595127	2.00416	0.00355361	5.92947	22.6667	3.6e-05	0.168649	0.466667	12	13	1.26038e-14			false	30.6667	12	0	0	0.739645	0.802236	false	0	ACVR2A	49132	0.976926
SLC6A13	ion transport	0.536272	0.0138473			5.22292	5868.64	0.00931306	0.191464	0.416667	15	12	3.73938e-14	false	false	false	24.1111	15	0	0	0.739575	2.73381	false	0	AKT1	0	0.977105
SLC6A12	ion transport	0.553233	0.0109788			5.14358	14351.3	0.0227778	0.194417	0.333333	16	12	3.76547e-14	false	false	false	22.6	16	0	0	0.739575	2.24855	false	0	ACVRL1	0	0.977105
SLC6A4	ion transport	-2.05435	0.0762219			5.92947	22.6667	3.6e-05	0.168649	0.466667	12	13	1.26038e-14	false	false	false	30.6667	12	0	0	0.739575	1.50478	false	0	AKT3	0	0.977105
SLC10A1	ion transport	2.39386	0.000465032	2.14731	0.0013683	5.92947	22.6667	3.6e-05	0.168649	0.466667	12	13	1.26038e-14	false	false	false	30.6667	12	0	0	0.739575	1.65343	false	0	AKT2	0	0.977105
SLC17A3	ion transport	1.57797	0.016123			5.92443	22.6667	3.6e-05	0.168793	0.822222	16	13	1.30042e-14	false	false	false	22.4	16	0	0	0.611111	0.511025	false	0	MOCS2	0	0
SLC17A2	ion transport	0.839406	0.0126028			5.92443	22.6667	3.6e-05	0.168793	0.822222	16	13	1.30042e-14	false	false	false	22.4	16	0	0	0.739575	0.181672	false	0	BMP2K	0	0.977105
SLC1A2	ion transport	0.979124	0.0180512			5.92947	22.6667	3.6e-05	0.168649	0.466667	12	13	1.26038e-14	false	false	false	30.6667	12	0	0	0.739575	1.56499	false	0	BCR	0	0.977105
SCN4A	ion transport	0.629917	0.643222	2.10914	0.00166905	5.92443	22.6667	3.6e-05	0.168793	0.822222	16	13	1.29672e-14	false	false	false	22.4	16	0	1	0.737056	1.55316	false	0	PAM	130170	0.351852
SCNN1A	ion transport	-0.189005	0.494972	2.24975	0.000617604	5.92443	22.6667	3.6e-05	0.168793	0.822222	16	13	1.29672e-14	false	false	false	22.4	16	0	0	0.739575	1.20518	false	0	BRAF	0	0.977105
SLC34A2	ion transport	3.85013	0.00349828			5.92443	22.6667	3.6e-05	0.168793	0.822222	16	13	1.30042e-14	false	false	false	22.4	16	0	0	0.739575	3.00162	false	0	BUB1B	0	0.977105
SLC38A1	ion transport	-1.51425	0.24161	2.10914	0.00166905	4.60076	53045.6	0.0839765	0.217356	0.120879	20	12	3.21917e-11			false	18.2143	20	0	0	0.739575	1.65343	false	0	AMHR2	0	0.977105
SLC20A2	ion transport	-0.643321	0.00467884			5.92443	22.6667	3.6e-05	0.168793	0.822222	16	13	1.30042e-14	false	false	false	22.4	16	0	0	0.739575	-0.700111	false	0	ATM	0	0.977105
SLC20A1	ion transport	-0.361906	0.277274	2.14731	0.0013683	5.92443	22.6667	3.6e-05	0.168793	0.822222	16	13	1.30042e-14			false	22.4	16	0	0	0.739575	1.87121	false	0	AURKA	0	0.977105
KCNH2	ion transport	-2.73961	0.083074	3.29254	9.64051e-08	5.94836	3144	0.00497426	0.168113	0.695238	19	13	8.67381e-15	false	false	false	17.1333	19	0	0	0.739575	0.161209	false	0	ATR	0	0.977105
CIB3	ion transport	1.04628	0.0918083			5.92443	22.6667	3.6e-05	0.168793	0.822222	16	13	1.29672e-14	false	false	false	22.4	16	0	0	0.739575	1.69468	false	0	RPS6KB2	0	0.977105
HCN3	ion transport	0.781794	0.087763			5.92443	22.6667	3.6e-05	0.168793	0.822222	16	13	1.29672e-14	false	false	false	22.4	16	0	0	0.739575	2.60811	false	0	SBK1	0	0.977105
KCNA7	ion transport	-2.19144	0.12302	2.39036	0.000215953	5.94836	3144	0.00497426	0.168113	0.695238	19	13	8.68075e-15	false	false	false	17.1333	19	0	0	0.739575	3.31959	false	0	SGK2	0	0.977105
KCNN2	ion transport	2.27042	0.00215954			5.94836	3144	0.00497426	0.168113	0.695238	19	13	8.68075e-15	false	false	false	17.1333	19	0	0	0.739575	0.901846	false	0	ROCK2	0	0.977105
KCNQ2	ion transport	-0.330081	0.788394	2.10914	0.00166905	5.94836	3144	0.00497426	0.168113	0.695238	19	13	8.68075e-15			false	17.1333	19	0	0	0.739575	0.231537	false	0	ROCK1	0	0.977105
NKAIN1	ion transport	-2.08477	0.00413986			4.97733	10656.1	0.0168617	0.200911	0.247312	59	12	2.6702e-13	false	false	false	11.7742	59	0	0	0.739575	0.674657	false	0	RPS6KA4	0	0.977105
ATP1A2	ion transport	-1.55404	0.0626344			4.97733	10656.1	0.0168617	0.200911	0.247312	59	12	2.67007e-13	false	false	false	11.7742	59	0	0	0.739575	0.803349	false	0	RPS6KA3	0	0.977105
ATP1B1	ion transport	-0.0541549	0.867959	2.86308	5.00265e-06	4.97733	10656.1	0.0168617	0.200911	0.247312	59	12	2.67007e-13			false	11.7742	59	0	0	0.739575	3.14704	false	0	STK16	0	0.977105
CIB1	ion transport	0.401144	0.2269	2.57677	5.52268e-05	5.92443	22.6667	3.6e-05	0.168793	0.822222	16	13	1.30027e-14			false	22.4	16	0	0	0.739575	1.13502	false	0	STK11	0	0.977105
ATP1B3	ion transport	-0.343577	0.0198989			4.97733	10656.1	0.0168617	0.200911	0.247312	59	12	2.67007e-13	false	false	false	11.7742	59	0	0	0.739575	4.67311	false	0	SGK3	0	0.977105
CLIC1	ion transport	-0.921146	0.0221995			6.75189	0	0	0.148107	1	2	14	4.13858e-17			false	9	2	0	0	0.739575	2.44851	false	0	SIK3	0	0.977105
CLCN7	ion transport	0.129002	0.320084	2.43362	0.000170083	6.75189	0	0	0.148107	1	2	14	4.13858e-17			false	9	2	0	0	0.739575	3.2314	false	0	SNRK	0	0.977105
CLCN2	ion transport	0.530395	0.0537776			6.75189	0	0	0.148107	1	2	14	4.13858e-17			false	9	2	0	0	0.739575	3.49859	false	0	SLK	0	0.977105
CLCC1	ion transport	0.625436	0.00415777			6.75189	0	0	0.148107	1	2	14	4.13858e-17			false	9	2	0	0	0.739575	3.88931	false	0	SRPK1	0	0.977105
SLC16A7	ion transport	0.820543	0.0107252			4.81108	9538.88	0.014971	0.207853	0.5	5	11	4.26882e-12	false	false	false	13.8	5	0	0	0.722992	1.74847	false	0	PIP4K2C	116306	0.535156
SLC16A8	ion transport	-0.39685	0.507067	2.86308	5.00265e-06	4.81108	9538.88	0.014971	0.207853	0.5	5	11	4.26882e-12	false	false	false	13.8	5	0	0	0.739575	1.50478	false	0	PRKCH	0	0.977105
CFTR	ion transport	-1.53692	0.183862	2.10914	0.00166905	6.75315	0	0	0.148079	0	1	14	4.16172e-17			false	16	1	0	0	0.739575	0.478273	false	0	PRKCZ	0	0.977105
CLCN6	ion transport	0.118156	0.510961	2.14731	0.0013683	5.75441	15923.5	0.0252369	0.17378	0.258333	16	13	4.9204e-15			false	8.3125	16	0	0	0.739575	0.271811	false	0	PLK3	0	0.977105
KCNE4	ion transport	-0.414475	0.661873	2.71993	1.70341e-05	6.93451	0	0	0.144206	1	11	14	2.82997e-16			false	12.4545	11	0	0	0.739575	2.44851	false	0	PLK4	0	0.977105
KCNG4	ion transport	-0.338697	0.412722	2.39036	0.000215953	6.93451	0	0	0.144206	1	11	14	2.83907e-16	false	false	false	12.4545	11	0	0	0.739575	0.855472	false	0	PRKCD	0	0.977105
KCNAB3	ion transport	0.182543	0.723405	2.43362	0.000170083	6.93451	0	0	0.144206	1	11	14	2.83907e-16			false	12.4545	11	0	0	0.739575	4.67311	false	0	RIOK1	0	0.977105
KCNAB1	ion transport	0.425061	0.335553	2.43362	0.000170083	6.93451	0	0	0.144206	1	11	14	2.83907e-16			false	12.4545	11	0	0	0.739575	-3.00277	false	0	RAF1	0	0.977105
KCNK5	ion transport	0.83516	0.0183613	2.14731	0.0013683	6.93451	0	0	0.144206	1	11	14	2.83907e-16	false	false	false	12.4545	11	0	0	0.739575	2.32739	false	0	RIOK3	0	0.977105
KCNJ8	ion transport	-0.24295	0.598876	2.29047	0.000496295	6.93451	0	0	0.144206	1	11	14	2.83907e-16	false	false	false	12.4545	11	0	0	0.739575	2.2866	false	0	RIOK2	0	0.977105
KCNQ4	ion transport	-2.19416	0.0739732			6.93451	0	0	0.144206	1	11	14	2.84774e-16	false	false	false	12.4545	11	0	0	0.739575	0.109093	false	0	RIPK1	0	0.977105
KCNN1	ion transport	0.725405	0.0284072			6.93451	0	0	0.144206	1	11	14	2.84774e-16	false	false	false	12.4545	11	0	0	0.739575	0.056516	false	0	PRKD2	0	0.977105
FAH	ion transport	1.96996	0.000134621			6.37909	1617.48	0.00249917	0.156762	0.333333	3	11	1.07462e-15	false	false	false	8.33333	3	0	0	0.739575	0.0324053	false	0	OXSR1	0	0.977105
CACNB2	ion transport	0.584218	0.628922	2.81218	6.75087e-06	6.92695	0	0	0.144364	1	12	14	1.16512e-16			false	12.5	12	0	0	0.739575	0.130167	false	0	PAK1	0	0.977105
CACNB4	ion transport	0.975479	0.0537793			6.92695	0	0	0.144364	1	12	14	1.16512e-16	false	false	false	12.5	12	0	0	0.739575	4.55517	false	0	PACSIN3	0	0.977105
CACNB3	ion transport	-0.943225	0.204521	2.14731	0.0013683	6.92695	0	0	0.144364	1	12	14	1.16512e-16	false	false	false	12.5	12	0	0	0.739575	0.0691171	false	0	PAK3	0	0.977105
CACNA1G	ion transport	-1.16473	0.509679	2.24975	0.000617604	6.92695	0	0	0.144364	1	12	14	1.16512e-16	false	false	false	12.5	12	0	0	0.739575	1.0075	false	0	PAK2	0	0.977105
ORAI1	ion transport	-0.504536	0.0447942			6.92695	0	0	0.144364	1	12	14	1.16512e-16	false	false	false	12.5	12	0	0	0.739575	0.838747	false	0	NEK9	0	0.977105
TPCN1	ion transport	0.948834	0.00193912			6.92695	0	0	0.144364	1	12	14	1.16512e-16	false	false	false	12.5	12	0	0	0.739575	3.14704	false	0	PIM1	0	0.977105
TMEM37	ion transport	1.25877	0.0730821	2.43362	0.000170083	6.92695	0	0	0.144364	1	12	14	1.16512e-16	false	false	false	12.5	12	0	0	0.739575	3.0657	false	0	PINK1	0	0.977105
TPCN2	ion transport	-0.174084	0.594754	2.86308	5.00265e-06	6.92695	0	0	0.144364	1	12	14	1.16512e-16	false	false	false	12.5	12	0	0	0.739575	1.06761	false	0	PKN2	0	0.977105
CACNG7	ion transport	5.41268	0.0220018			6.92695	0	0	0.144364	1	12	14	1.16512e-16	false	false	false	12.5	12	0	0	0.739575	0.056516	false	0	PLK1	0	0.977105
BDH1	ion transport	1.95164	0.0270847			5.68766	2636.64	0.00410746	0.175819	0.4	6	10	6.77896e-14	false	false	false	4	6	0	0	0.739575	0.529293	false	0	PKN3	0	0.977105
BDH2	ion transport	1.64794	0.0859166			5.68766	2636.64	0.00410746	0.175819	0.4	6	10	6.77896e-14	false	false	false	4	6	0	0	0.739575	2.24855	false	0	PAK6	0	0.977105
CACNA1A	ion transport	1.65639	0.119398	2.00416	0.00355361	6.92695	0	0	0.144364	1	12	14	1.16512e-16	false	false	false	12.5	12	0	0	0.739575	0.449874	false	0	PAK4	0	0.977105
ADHFE1	ion transport	0.406146	0.0682189			6.68514	0	0	0.149586	1	2	11	1.06755e-15	false	false	false	6	2	0	0	0.739575	3.00162	false	0	PDIK1L	0	0.977105
HMGCL	ion transport	0.445615	0.018836			6.17884	1279.47	0.00190571	0.161843	0.333333	3	10	1.79263e-15	false	false	false	6	3	0	0	0.786174	2.13233	false	0	PIK3R4	6681460	0.823847
NADSYN1	NAD de novo biosynthesis	0.569423	0.109627	2.00416	0.00355361	4.62594	27404.9	0.0436104	0.216172	0.166667	13	13	1.88087e-10	false	false	false	15	13	0	0	0.739575	3.14704	false	0	MARCKS	0	0.977105
NMRK1	NAD de novo biosynthesis	1.52679	0.00134468			6.22922	3180	0.00503143	0.160534	0.333333	3	15	2.22416e-13	false	false	false	4.66667	3	0	0	0.739575	4.67311	false	0	MARK3	0	0.977105
QPRT	NAD de novo biosynthesis	0.598957	0.0183596			5.45718	2405.6	0.00082408	0.183245	0.166667	4	14	7.95138e-10	false	false	false	7.75	4	0	0	0.739575	2.39943	false	0	MARK4	0	0.977105
NQO2	NAD de novo biosynthesis	0.873383	0.00847164			7.22544	1592	0.00251889	0.1384	0	2	16	1.74994e-15	false	false	false	2	2	0	0	0.739575	1.01906	false	0	MAST3	0	0.977105
NQO1	NAD de novo biosynthesis	0.554386	0.186296	2.00416	0.00355361	8.22418	0	0	0.121593	0	1	17	1.45813e-17			false	2	1	0	0	0.739575	0.109093	false	0	MAP4K2	0	0.977105
NMNAT1	NAD de novo biosynthesis	-0.452002	0.00192415			5.23678	6261.26	0.00981329	0.190957	0.333333	6	14	1.41224e-11	false	false	false	7.5	6	0	0	0.739575	0.287586	false	0	MAP4K4	0	0.977105
NMNAT3	NAD de novo biosynthesis	-0.608533	0.0165688			5.23678	6261.26	0.00981329	0.190957	0.333333	6	14	1.41224e-11	false	false	false	7.5	6	0	0	0.739575	0.229711	false	0	MAP4K3	0	0.977105
SLC17A8	neurotransmitter transport	1.84155	0.0049545			6.37028	18.5658	2.949e-05	0.156979	0.666667	3	14	4.0145e-15	false	false	false	3.33333	3	0	0	0.739575	0.939406	false	0	MAPKAPK2	0	0.977105
GLUL	neurotransmitter transport	0.505405	0.0935934			4.55668	13847.3	0.0219415	0.219458	0.0277778	9	12	3.21938e-11	false	false	false	8.33333	9	0	0	0.739575	1.11106	false	0	MAP4K5	0	0.977105
SLC17A7	neurotransmitter transport	-0.685486	0.54524	2.24975	0.000617604	6.37028	18.5658	2.949e-05	0.156979	0.666667	3	14	4.0145e-15	false	false	false	3.33333	3	0	0	0.75091	0.738634	false	0	MPC2	0	0.532258
OPLAH	neurotransmitter transport	1.9666	2.47715e-06			5.55038	1370.12	0.0021665	0.180168	0.333333	3	13	2.53591e-13	false	false	false	5	3	0	0	0.75091	2.66384	false	0	MPC1	0	0.532258
ALDH4A1	neurotransmitter transport	1.54747	0.000131077			5.37531	2275.03	0.00360359	0.186036	0.166667	4	13	2.54366e-13	false	false	false	5.75	4	0	0	0.739575	0.134774	false	0	MAPKAPK3	0	0.977105
DNM1	nucleotide biosynthetic process	-1.26932	0.260282	2.10914	0.00166905	5.11587	36.7415	5.835e-05	0.19547	0.785714	8	15	2.40895e-09	false	false	false	23.625	8	0	0	0.739575	0.056516	false	0	NEK2	0	0.977105
DNM1L	nucleotide biosynthetic process	-0.359669	0.0106133			5.11587	36.7415	5.835e-05	0.19547	0.785714	8	15	2.40895e-09	false	false	false	23.625	8	0	0	0.739575	3.00162	false	0	MAST4	0	0.977105
DNM2	nucleotide biosynthetic process	0.621749	0.00951256			5.11587	36.7415	5.835e-05	0.19547	0.785714	8	15	2.40894e-09	false	false	false	23.625	8	0	0	0.666597	0.0853098	false	0	GPHN	125954	0.5
DTYMK	nucleotide biosynthetic process	-0.0611146	0.574707	2.57677	5.52268e-05	5.0063	2123.89	0.00337016	0.199748	0.52381	7	15	3.77872e-09			false	22.2857	7	0	0	0.739575	0.533502	false	0	MKNK2	0	0.977105
TDG	nucleotide biosynthetic process	-0.518064	0.0469596			6.13098	0	0	0.163106	0	1	15	6.21478e-12	false	false	false	5	1	0	0	0.739575	1.65343	false	0	MKNK1	0	0.977105
GUK1	nucleotide biosynthetic process	-0.370298	0.0636585			4.79471	11135.9	0.0176281	0.208563	0.35	16	15	6.15202e-09	false	false	false	21.6875	16	0	0	0.706759	5.30681	false	0	MRI1	32034	0.5
CTPS2	nucleotide biosynthetic process	1.1768	0.00174275			4.33123	56700	0.0900681	0.230881	0.393939	12	13	3.89238e-09	false	false	false	20.6667	12	0	0	0.739575	0.0200536	false	0	MTOR	0	0.977105
UGT2A3	nucleotide biosynthetic process	0.810414	0.0403829			7.47859	0.4	6.4e-07	0.133715	0.833333	4	16	9.16811e-14	false	false	false	4.5	4	0	0	0.694724	2.44851	false	0	GBE1	0	1
UGT1A9	nucleotide biosynthetic process	-0.043763	0.893812	2.29047	0.000496295	7.47859	0.4	6.4e-07	0.133715	0.833333	4	16	9.16811e-14			false	4.5	4	0	0	0.756087	1.41223	false	0	ADSL	0	0.576923
VDAC3	nucleotide biosynthetic process	0.0862323	0.481768	2.24975	0.000617604	4.48615	61289.7	0.0969065	0.222908	0.107527	31	12	1.88617e-10			false	8.03226	31	0	1	0.787853	0.385718	false	0	UPRT	472396	0.178161
SLC35D1	nucleotide biosynthetic process	0.0714496	0.705065	2.43362	0.000170083	6.48489	3171	0.00501714	0.154205	0.3	5	15	5.73008e-12			false	3.8	5	0	0	0.810733	4.49834	false	0	APRT	2819032	0.224138
ENTPD5	nucleotide biosynthetic process	0.894264	0.00516366			5.30227	0	0	0.188599	1	3	14	9.83918e-11	false	false	false	15.6667	3	0	0	0.692835	1.28495	false	0	AMDHD1	104024	0.5
ATAD2	nucleotide biosynthetic process	1.1296	0.0461771			4.55164	3546.6	0.0055891	0.219701	0.8	11	13	2.36045e-09	false	false	false	22.1818	11	0	0	0.63749	0.95784	false	0	UROC1	52014	0.5
ATP5D	nucleotide biosynthetic process	0.319187	0.0395698			5.05164	1998.16	0.00316908	0.197956	0.438596	19	14	2.65949e-10	false	false	false	13.6842	19	0	0	0.651273	1.40934	false	0	APIP	0	0
ATP6V0B	nucleotide biosynthetic process	-0.192483	0.0911257			4.55038	3997.99	0.00630197	0.219762	0.606061	12	13	2.32881e-09	false	false	false	23.5	12	0	0	0.781976	2.3968	false	0	PRPS1	520826	0.193878
ATP6V1A	nucleotide biosynthetic process	0.310492	0.0659754			4.55038	3997.99	0.00630197	0.219762	0.606061	12	13	2.32881e-09	false	false	false	23.5	12	0	0	0.752379	1.24657	false	0	QPRT	25158	0.426471
ATP5H	nucleotide biosynthetic process	0.690192	0.0539999			5.05164	1998.16	0.00316908	0.197956	0.438596	19	14	2.65949e-10	false	false	false	13.6842	19	0	2	0.785964	3.88931	false	0	UMPS	11924	0.489474
ATP5L	nucleotide biosynthetic process	0.360779	0.285064	2.00416	0.00355361	5.05164	1998.16	0.00316908	0.197956	0.438596	19	14	2.65949e-10			false	13.6842	19	0	1	0.819829	4.67311	false	0	UCKL1	5098908	0.187308
AK4	nucleotide biosynthetic process	0.44411	0.0826697	2.24975	0.000617604	4.30605	9533.51	0.015286	0.232232	0.419913	22	13	6.19869e-09	false	false	false	21.7727	22	0	0	0.777918	0.310157	false	0	NAMPT	653338	0.21746
AK3	nucleotide biosynthetic process	0.55275	0.0057655			4.30605	9533.51	0.015286	0.232232	0.419913	22	13	6.19869e-09	false	false	false	21.7727	22	0	0	0.770431	1.43393	false	0	DPYD	98526	0.286667
AK5	nucleotide biosynthetic process	0.675154	0.484481	2.10914	0.00166905	4.3073	9106.56	0.0146113	0.232164	0.447619	21	13	6.19791e-09	false	false	false	22.6667	21	0	0	0.687028	1.79067	false	0	QDPR	0	0.642857
ADK	nucleotide biosynthetic process	0.506239	0.0142342			5.11713	8452.91	0.0133855	0.195422	0.333333	9	14	1.86779e-10	false	false	false	14	9	0	0	0.693885	0.0715193	false	0	RENBP	0	0
AK1	nucleotide biosynthetic process	1.16985	0.313393	2.29047	0.000496295	4.37531	4465.49	0.007192	0.228555	0.561905	15	13	2.4487e-09	false	false	false	22	15	0	0	0.686468	2.44851	false	0	DHCR7	289114	0.488889
AK2	nucleotide biosynthetic process	0.361344	0.0330133			4.37531	4465.49	0.007192	0.228555	0.561905	15	13	2.4487e-09	false	false	false	22	15	0	0	0.79569	7.44081	false	0	PIGL	299850	0.5
ADSSL1	nucleotide biosynthetic process	1.11653	0.00766101	2.43362	0.000170083	4.62091	11134.2	0.0177271	0.216408	0.466667	16	14	6.20113e-09	false	false	false	23.375	16	0	0	0.637979	0.626981	false	0	PGLS	0	0.611111
GMPPA	nucleotide biosynthetic process	0.577996	0.036429			4.96599	2314.52	0.0036491	0.20137	0.291667	16	14	2.69516e-09	false	false	false	14	16	0	0	0.693255	3.88931	false	0	H6PD	1055100	0.27551
GDPGP1	nucleotide biosynthetic process	0.648644	0.00184134	2.57677	5.52268e-05	4.61209	14679.8	0.0232446	0.216821	0.433048	28	14	8.69103e-09	false	false	false	19.1852	28	0	0	0.724251	5.65514	false	0	GMDS	0	1
GMPPB	nucleotide biosynthetic process	0.919688	0.0394539			4.96599	2314.52	0.0036491	0.20137	0.291667	16	14	2.69516e-09	false	false	false	14	16	0	0	0.638119	2.44851	false	0	PGD	450674	0.321429
ADSS	nucleotide biosynthetic process	-0.662594	0.00462471			4.62091	11134.2	0.0177271	0.216408	0.466667	16	14	6.20113e-09	false	false	false	23.375	16	0	0	0.582634	3.188	false	0	IDNK	0	0
NME1	nucleotide biosynthetic process	-0.519218	0.0191406			4.02015	22033.9	0.0349475	0.248747	0.432184	30	14	9.59605e-08	false	false	false	20.1667	30	0	0	0.747201	7.76849	false	0	OPLAH	37316	0.466667
NME2	nucleotide biosynthetic process	-0.934008	0.0593391			4.02015	22033.9	0.0349475	0.248747	0.432184	30	14	9.59605e-08	false	false	false	20.1667	30	0	0	0.798349	4.49834	false	0	GDPD5	44118	0.277778
NME4	nucleotide biosynthetic process	-0.898632	0.0858874			4.02015	22033.9	0.0349475	0.248747	0.432184	30	14	9.59605e-08	false	false	false	20.1667	30	0	0	0.798349	2.44851	false	0	GPCPD1	44118	0.277778
NME6	nucleotide biosynthetic process	-0.608587	0.037938			4.02015	22033.9	0.0349475	0.248747	0.432184	30	14	9.59605e-08	false	false	false	20.1667	30	0	0	0.63672	2.62077	false	0	SC5D	26	0.625
NME5	nucleotide biosynthetic process	0.950933	0.542522	2.57677	5.52268e-05	4.02015	22033.9	0.0349475	0.248747	0.432184	30	14	9.59605e-08			false	20.1667	30	0	0	0.803736	1.20527	false	0	PIGC	598548	0.281481
SLC25A20	nucleotide biosynthetic process	0.45858	0.00366302			5.48489	0	0	0.182319	0	1	13	1.48517e-12			false	31	1	0	0	0.820809	2.44851	false	0	CDIPT	9350054	0.149854
DPYSL2	nucleotide biosynthetic process	1.19626	0.124641	2.00416	0.00355361	6.44836	0	0	0.155078	1	2	14	4.93341e-14	false	false	false	3	2	0	0	0.812972	0.130371	false	0	ALDH9A1	403590	0.177311
RRM2	nucleotide biosynthetic process	0.523845	0.18035	2.14731	0.0013683	4.17758	18954.3	0.0299802	0.239373	0.314367	38	14	9.56791e-08			false	18.3684	38	0	0	0.687028	1.66794	false	0	PCBD1	0	0.642857
RRM2B	nucleotide biosynthetic process	-1.1358	0.00877653			4.17758	18954.3	0.0299802	0.239373	0.314367	38	14	9.56791e-08	false	false	false	18.3684	38	0	0	0.692765	6.35728	false	0	GANAB	0	0.636364
SPATA5	nucleotide biosynthetic process	-0.872456	0.0274834			4.55164	3546.6	0.0055891	0.219701	0.8	11	13	2.36045e-09	false	false	false	22.1818	11	0	0	0.742443	3.02161	false	0	PAH	61068	0.281106
SPAST	nucleotide biosynthetic process	-0.148323	0.201642	2.00416	0.00355361	4.55164	3546.6	0.0055891	0.219701	0.8	11	13	2.36045e-09			false	22.1818	11	0	1	0.733067	3.00162	false	0	GAPDHS	22454	0.395833
DDX19B	nucleotide biosynthetic process	-0.423607	0.0379504			4.55164	3546.6	0.0055891	0.219701	0.8	11	13	2.36045e-09	false	false	false	22.1818	11	0	0	0.755458	0.261422	false	0	PGM2L1	127814	0.207447
ATP6V1E1	nucleotide biosynthetic process	0.244482	0.100413			4.55038	3997.99	0.00630197	0.219762	0.606061	12	13	2.32881e-09	false	false	false	23.5	12	0	0	0.729429	0.0530078	false	0	PHGDH	51084	0.354167
ATP6V1H	nucleotide biosynthetic process	-0.808264	0.00101553			4.55038	3997.99	0.00630197	0.219762	0.606061	12	13	2.32881e-09	false	false	false	23.5	12	0	0	0.752729	0.752718	false	0	DPYS	44264	0.321429
RRM1	nucleotide biosynthetic process	0.606536	0.0491475			4.17758	18954.3	0.0299802	0.239373	0.314367	38	14	9.56791e-08	false	false	false	18.3684	38	0	0	0.633921	3.46008	false	0	CDO1	0	0
KATNA1	nucleotide biosynthetic process	-0.126149	0.634805	2.29047	0.000496295	4.55164	3546.6	0.0055891	0.219701	0.8	11	13	2.36045e-09			false	22.1818	11	0	0	0.762105	2.44851	false	0	MTAP	257708	0.243478
ENTPD8	nucleotide biosynthetic process	1.57233	0.00504605			4.72544	4558.35	0.00753993	0.21162	0.342857	21	13	3.79389e-10	false	false	false	15.0476	21	0	0	0.7493	1.27449	false	0	MGAT5	11720	0.588235
KLC1	nucleotide biosynthetic process	-0.466511	0.0136303	2.43362	0.000170083	4.55164	3546.6	0.0055891	0.219701	0.8	11	13	2.36045e-09	false	false	false	22.1818	11	0	0	0.753568	3.72926	false	0	IMPDH1	19594	0.473684
PMM1	nucleotide biosynthetic process	-1.02229	0.0618111			5.91058	360.187	0.00057279	0.169188	0.333333	3	15	4.2495e-11	false	false	false	13.6667	3	0	0	0.753568	3.88931	false	0	IMPDH2	19594	0.473684
MOCS2	nucleotide biosynthetic process	0.442696	0.0501547			8	0	0	0.125	0	1	16	1.48515e-18	false	false	false	2	1	0	0	0.652953	0.780129	false	0	GALNT7	0	0.4
MPC2	nucleotide biosynthetic process	0.572282	0.0367498			5.48363	0	0	0.182361	1	2	13	1.49696e-12			false	16.5	2	0	0	0.652953	1.12506	false	0	GALNT1	0	0.4
MPC1	nucleotide biosynthetic process	0.854479	0.00264787			5.48363	0	0	0.182361	1	2	13	1.49696e-12			false	16.5	2	0	0	0.652953	0.205584	false	0	GALNT2	0	0.4
GPHN	nucleotide biosynthetic process	-0.282493	0.089726			7.00126	1592	0.00251889	0.142831	0	2	15	1.89523e-16	false	false	false	4	2	0	0	0.652953	2.44851	false	0	GALNT4	0	0.4
ADSL	nucleotide biosynthetic process	-0.591376	0.0146408			5.39043	0	0	0.185514	1	3	14	9.84344e-11	false	false	false	15	3	0	0	0.708298	2.44851	false	0	GALK2	0	0
UPRT	nucleotide biosynthetic process	-0.612446	0.0595204			4.81864	4514.5	0.00802649	0.207527	0.181818	13	13	3.72624e-09	false	false	false	10.4167	13	0	0	0.695284	3.14704	false	0	UGDH	208558	0.485714
PRPS1	nucleotide biosynthetic process	-0.522539	0.00381371			4.92443	4934.43	0.00786538	0.203069	0.0476191	7	13	7.61912e-10	false	false	false	8.85714	7	0	0	0.673174	2.90246	false	0	HGD	6506	0.5
UMPS	nucleotide biosynthetic process	-0.115862	0.534131	2.29047	0.000496295	4.85264	483.144	0.00096084	0.206073	0.4	7	14	8.80984e-08			false	18.8	7	0	0	0.652953	1.01193	false	0	GALNT10	0	0.4
UCKL1	nucleotide biosynthetic process	-0.285327	0.145546	2.43362	0.000170083	4.24307	42611.8	0.0641809	0.235678	0.333333	26	13	9.64662e-08	false	false	false	19.48	26	0	0	0.812972	0.197228	false	0	ALDH1B1	1144930	0.137681
DPYD	nucleotide biosynthetic process	0.469185	0.0142132			5.13224	5120.9	0.00810591	0.194847	0.1	5	14	7.89278e-10	false	false	false	9.2	5	0	0	0.646865	6.35728	false	0	TYW1	12	0.7
GMDS	nucleotide biosynthetic process	-0.5166	0.373764	2.57677	5.52268e-05	5.96348	0	0	0.167687	1	2	15	4.24433e-11	false	false	false	16	2	0	0	0.701161	4.84424	false	0	FAH	81444	0.444444
DPYS	nucleotide biosynthetic process	0.883573	0.0360495			5.45088	4073.56	0.00644633	0.183457	0.166667	4	13	6.21614e-12	false	false	false	2.75	4	0	0	0.695984	2.77733	false	0	GSTZ1	122172	0.468227
UGDH	nucleotide biosynthetic process	1.04574	0.0077277	2.14731	0.0013683	6.48489	3171	0.00501714	0.154205	0.3	5	15	5.73008e-12	false	false	false	3.8	5	0	0	0.713546	1.76402	false	0	PUS1	0	0
PDE9A	nucleotide biosynthetic process	1.54949	0.0430677			5.78086	0.80479	1.28e-06	0.172985	0.833333	4	16	7.9455e-11	false	false	false	9.5	4	0	0	0.419955	2.05204	false	0	COQ2	146420	0.5
PDE6C	nucleotide biosynthetic process	-1.55335	0.0408294			5.78086	0.80479	1.28e-06	0.172985	0.833333	4	16	7.9455e-11	false	false	false	9.5	4	0	0	0.633151	1.31512	false	0	NSDHL	0	0
ADCY10	nucleotide biosynthetic process	2.39293	0.0130587			5.32997	104.337	0.00016426	0.187618	0.916667	9	13	8.08575e-12	false	false	false	14.7778	9	0	0	0.784425	2.02798	false	0	SPTLC2	188948	0.244231
ADCY3	nucleotide biosynthetic process	0.818026	0.20368	2.39036	0.000215953	5.32997	104.337	0.00016426	0.187618	0.916667	9	13	8.08575e-12	false	false	false	14.7778	9	0	0	0.784425	1.87993	false	0	SPTSSA	188948	0.244231
NPR1	nucleotide biosynthetic process	-0.0680862	0.901275	2.57677	5.52268e-05	4.99118	4291.93	0.00680166	0.200353	0.464286	8	15	3.77984e-09	false	false	false	21	8	0	0	0.784425	1.69468	false	0	SPTLC1	188948	0.244231
ADCY5	nucleotide biosynthetic process	0.200757	0.724934	2.14731	0.0013683	5.32997	104.337	0.00016426	0.187618	0.916667	9	13	8.08575e-12	false	false	false	14.7778	9	0	0	0.736706	0.0884921	false	0	KDSR	15432	0.523077
ADCY7	nucleotide biosynthetic process	-0.74271	0.189242	2.00416	0.00355361	5.32997	104.337	0.00016426	0.187618	0.916667	9	13	8.08575e-12			false	14.7778	9	0	0	0.744263	1.37977	false	0	TAT	37000	0.435484
ADCY6	nucleotide biosynthetic process	-0.317816	0.0954486			5.32997	104.337	0.00016426	0.187618	0.916667	9	13	8.08575e-12	false	false	false	14.7778	9	0	1	0.72712	0.55429	false	0	SMOX	0	0.583333
ADCY8	nucleotide biosynthetic process	3.15022	0.0731936			5.32997	104.337	0.00016426	0.187618	0.916667	9	13	8.08575e-12	false	false	false	14.7778	9	0	0	0.77183	2.93223	false	0	ADH4	3294	0.449735
UCK2	nucleotide biosynthetic process	-0.563435	0.109874	2.29047	0.000496295	4.42569	2070.44	0.00350558	0.225953	0.639706	17	14	9.50072e-08	false	false	false	25.4706	17	0	0	0.777778	1.4073	false	0	ELOVL1	55260	0.347222
UCK1	nucleotide biosynthetic process	0.144628	0.420139	2.53097	7.1555e-05	4.42569	2070.44	0.00350558	0.225953	0.639706	17	14	9.50072e-08			false	25.4706	17	0	0	0.677092	0.557728	false	0	GLYCTK	0	0.714286
TK1	nucleotide biosynthetic process	-0.222322	0.501588	2.29047	0.000496295	5.84761	2	3.18e-06	0.17101	0.666667	3	15	4.79006e-11			false	5.33333	3	0	2	0.776518	2.07092	false	0	SCP2	356872	0.179864
TK2	nucleotide biosynthetic process	-0.110622	0.514243	3.14939	3.7563e-07	5.84761	2	3.18e-06	0.17101	0.666667	3	15	4.79006e-11			false	5.33333	3	0	0	0.719284	1.25668	false	0	GRHPR	0	0
TYMP	nucleotide biosynthetic process	0.730253	0.0349989	2.14731	0.0013683	5.91688	444.308	0.000706	0.169008	0.166667	4	15	3.35626e-11	false	false	false	7.25	4	0	0	0.694165	0.123156	false	0	FUK	0	0
CDA	nucleotide biosynthetic process	-1.02321	0.00345587			5.20781	1569.98	0.00247343	0.192019	0.266667	6	14	2.25677e-09	false	false	false	11.5	6	0	0	0.674853	7.65585	false	0	IVD	0	0
DGUOK	nucleotide biosynthetic process	-0.484714	0.0387399			5.21662	21.0438	3.426e-05	0.191695	0	2	14	9.72434e-11	false	false	false	18.5	2	0	2	0.724111	0.500993	false	0	KYNU	321156	0.264706
IP6K2	nucleotide biosynthetic process	0.421543	0.0783291			5.93577	0	0	0.16847	1	5	15	2.04517e-09	false	false	false	7.66667	5	0	1	0.774769	0.398907	false	0	AGXT	1087178	0.128671
NUDT3	nucleotide biosynthetic process	-0.316777	0.0448396	2.00416	0.00355361	5.14106	6765.86	0.01069	0.194512	0.466667	8	14	2.83388e-09	false	false	false	10.6667	8	0	0	0.668626	0.438443	false	0	HAAO	0	0
NUDT4	nucleotide biosynthetic process	-0.395519	0.0309465			5.14106	6765.86	0.01069	0.194512	0.466667	8	14	2.83388e-09	false	false	false	10.6667	8	0	0	0.756927	4.86377	false	0	ALDH4A1	56392	0.308824
ENPP1	nucleotide biosynthetic process	0.732766	0.0591158	2.43362	0.000170083	7.2267	0	0	0.138376	1	2	16	1.76518e-15	false	false	false	3	2	0	0	0.669605	2.19637	false	0	DHTKD1	9412	0.5
ENPP3	nucleotide biosynthetic process	1.21593	0.0361527			7.2267	0	0	0.138376	1	2	16	1.76518e-15	false	false	false	3	2	0	0	0.774699	0.128751	false	0	BCKDHA	200518	0.388889
NNT	nucleotide biosynthetic process	0.457904	0.00663752			6.22922	3180	0.00503143	0.160534	0.333333	4	15	2.22449e-13	false	false	false	4	4	0	0	0.707599	2.32958	false	0	AADAT	67508	0.291667
LDHD	nucleotide biosynthetic process	0.240555	0.0547313	2.00416	0.00355361	5.3728	11827.1	0.018716	0.186123	0	2	13	1.48527e-12			false	25	2	0	0	0.36461	2.44851	false	0	COQ6	73212	0.5
UPB1	nucleotide biosynthetic process	0.523026	0.0671882			5.35264	2505.7	0.00395981	0.186824	0	2	12	7.33912e-14	false	false	false	5.5	2	0	1	0.77358	0.573863	false	0	PGM2	305146	0.130378
ME2	nucleotide biosynthetic process	-0.897032	0.161872	2.43362	0.000170083	5.48489	0	0	0.182319	0	1	13	1.48517e-12			false	31	1	0	0	0.309124	4.67311	false	0	COQ5	0	0
ABAT	nucleotide biosynthetic process	1.86614	0.000519228			4.53275	19503.8	0.0309309	0.220617	0.0476191	7	11	3.10554e-12	false	false	false	8.14286	7	0	0	0.77295	5.30681	false	0	LRAT	36228	0.492308
ATIC	nucleotide biosynthetic process	-0.761125	0.00523798			4.93703	21810.4	0.0346086	0.202551	0.205128	15	13	9.89183e-11	false	false	false	10.1538	15	0	0	0.758676	3.00162	false	0	LYPLA2	2736	0.540323
FUT1	nucleotide biosynthetic process	-1.92676	0.027423			4.88035	175.489	0.00027871	0.204903	0.709091	11	15	6.14898e-09	false	false	false	29.3636	11	0	0	0.758676	0.92341	false	0	PNPLA6	2736	0.540323
UGT3A2	nucleotide biosynthetic process	0.398591	0.084745			7.47859	0.4	6.4e-07	0.133715	0.833333	4	16	9.16811e-14	false	false	false	4.5	4	0	3	0.738805	3.24531	false	0	LIPE	214008	0.205882
UXS1	nucleotide biosynthetic process	-0.434073	0.0553304			7.48111	0.4	6.4e-07	0.13367	0	2	16	9.02372e-14	false	false	false	5	2	0	0	0.647285	1.96583	false	0	EBP	3558	0.424242
ENTPD2	nucleotide biosynthetic process	-0.867825	0.0982858			5.01385	0	0	0.199447	1	5	15	3.77797e-09	false	false	false	30	5	0	0	0.734817	1.74571	false	0	PDE10A	1185930	0.295652
ENTPD6	nucleotide biosynthetic process	-0.521566	0.0357513			5.30227	0	0	0.188599	1	3	14	9.83918e-11	false	false	false	15.6667	3	0	0	0.734397	0.622525	false	0	PDE9A	18	0.413043
OAS3	nucleotide biosynthetic process	-0.450165	0.781833	2.24975	0.000617604	5.33627	104.337	0.00016426	0.187397	0.5	4	13	7.76741e-12			false	22	4	0	0	0.734397	0.661587	false	0	PDE6C	18	0.413043
ALDH5A1	nucleotide biosynthetic process	0.854945	0.00662696			5.53149	0	0	0.180783	0	1	12	2.44471e-14	false	false	false	7	1	0	0	0.759446	1.49593	false	0	ADCY10	9786	0.378917
DPYSL5	nucleotide biosynthetic process	0.735648	0.58684	2.43362	0.000170083	6.44836	0	0	0.155078	1	2	14	4.93342e-14			false	3	2	0	0	0.759446	3.03468	false	0	ADCY3	9786	0.378917
SLC23A2	oxidation reduction	-0.565885	0.0607114			5.71033	4779.82	0.00758378	0.175121	0.25	14	13	1.26753e-14	false	false	false	23.625	14	0	0	0.778268	5.49639	false	0	NPR1	503190	0.538462
GLRX	oxidation reduction	1.70542	0.0190826	2.10914	0.00166905	6.46096	779.473	0.00123759	0.154776	0	4	14	1.95401e-16	false	false	false	8	4	0	0	0.759446	1.65343	false	0	ADCY5	9786	0.378917
CYBRD1	oxidation reduction	-1.05025	0.348467	2.10914	0.00166905	6.61335	167.797	0.0002672	0.151209	0	2	14	8.97856e-17	false	false	false	5.5	2	0	0	0.759446	0.939406	false	0	ADCY7	9786	0.378917
ADH5	oxidation reduction	0.243713	0.0623328			5.10957	0	0	0.195711	1	5	11	1.15407e-11	false	false	false	16	5	0	0	0.759446	0.0400582	false	0	ADCY6	9786	0.378917
PAM	oxidation reduction	-0.767552	0.0120765			5.733	4290.78	0.00681142	0.174429	0	4	14	1.19552e-14	false	false	false	7.33333	4	0	0	0.759446	0.234366	false	0	ADCY8	9786	0.378917
ALDH9A1	oxidation reduction	0.759435	0.000492746			4.3665	17095.2	0.0271938	0.229016	0.406593	14	11	3.61766e-10	false	false	false	15.2143	14	0	0	0.475161	0.539865	false	0	PDSS1	219624	0.5
ALDH1B1	oxidation reduction	0.547666	0.0770034			4.3665	21040.5	0.0323192	0.229016	0.261905	21	10	3.62399e-10	false	false	false	12.6667	21	0	1	0.776938	3.00162	false	0	AOC2	105342	0.415179
ADH4	oxidation reduction	0.770995	0.00183503			5.10705	115.104	0.00018181	0.195808	0.666667	7	11	1.1654e-11	false	false	false	12.1429	7	0	2	0.791282	0.0658314	false	0	MAOB	45266	0.292929
AOC2	oxidation reduction	-0.966905	0.00979646	2.10914	0.00166905	5.01511	5114.66	0.00808585	0.199397	0.714286	8	11	1.43808e-11	false	false	false	13.4286	8	0	0	0.77204	1.22063	false	0	SDS	466508	0.251724
MAOB	oxidation reduction	0.900932	0.011423			4.75693	2750.05	0.00436113	0.21022	0.611111	11	11	3.5782e-10	false	false	false	12.8889	11	0	1	0.732718	0.161209	false	0	ENO3	88824	0.5
CAT	oxidation reduction	0.495194	0.023774			5.23804	0	0	0.190911	1	3	11	8.60042e-12	false	false	false	19.6667	3	0	1	0.732718	0.84665	false	0	ENO2	88824	0.5
ALKBH5	oxidation reduction	0.354736	0.0560631			4.74685	5776.13	0.0087705	0.210666	0.8	6	11	1.6595e-11	false	false	false	14	6	0	0	0.809684	3.88931	false	0	UCK2	232668	0.322413
ALKBH4	oxidation reduction	0.342398	0.0847005	2.53097	7.1555e-05	4.74685	5776.13	0.0087705	0.210666	0.8	6	11	1.6595e-11	false	false	false	14	6	0	1	0.710188	0.128035	false	0	INPP5A	219338	0.529293
ALKBH7	oxidation reduction	1.03425	0.00212752			4.74685	5776.13	0.0087705	0.210666	0.8	6	11	1.6595e-11	false	false	false	14	6	0	0	0.809684	5.30681	false	0	UCK1	232668	0.322413
RNLS	oxidation reduction	-0.683466	0.0642591			5.27834	0	0	0.189454	1	3	12	5.83865e-12	false	false	false	15	3	0	0	0.721732	1.88792	false	0	INPP1	35682	0.582386
ALDH3A2	oxidation reduction	0.504972	0.0287995			4.28212	23447.9	0.0366044	0.233529	0.3	20	11	3.67991e-10	false	false	false	13.65	20	0	8	0.737126	1.99781	false	0	ITPK1	4105492	0.554545
COMT	oxidation reduction	0.955047	0.00437492			5.26071	1.85386	2.94e-06	0.190089	0.833333	4	12	8.65613e-12	false	false	false	13.5	4	0	0	0.678352	3.14704	false	0	ITPKA	10	0.684524
ALDH2	oxidation reduction	0.596225	0.0168002	2.29047	0.000496295	4.38161	13443.3	0.0209004	0.228226	0.326797	18	11	3.61865e-10	false	false	false	11.9444	18	0	0	0.678352	3.00162	false	0	ITPKB	10	0.684524
PIK3CD	phosphoinositide metabolic process	0.0313854	0.977505	2.71993	1.70341e-05	6.48992	114.142	0.00018203	0.154085	0.758242	14	15	5.93405e-06	false	false	false	17.5714	14	0	0	0.662608	1.0619	false	0	CBR3	0	0.625
PIK3CB	phosphoinositide metabolic process	-0.66325	0.0226339	2.14731	0.0013683	6.48992	114.142	0.00018203	0.154085	0.758242	14	15	5.93405e-06	false	false	false	17.5714	14	0	0	0.688637	0.130997	false	0	HSD17B7	354032	0.2625
PIK3R1	phosphoinositide metabolic process	0.715882	0.0483516			6.48992	114.142	0.00018203	0.154085	0.758242	14	15	5.93405e-06	false	false	false	17.5714	14	0	0	0.77253	4.67311	false	0	DHRS9	202854	0.214286
PIK3R2	phosphoinositide metabolic process	0.809204	0.0228895			6.48992	114.142	0.00018203	0.154085	0.758242	14	15	5.93405e-06	false	false	false	17.5714	14	0	0	0.769032	2.44851	false	0	PUS7	81818	0.284211
NARS	phosphoinositide metabolic process	-0.588624	0.0163831			6.09698	0	0	0.164016	0	1	13	9.0114e-15	false	false	false	9	1	0	0	0.741044	0.567745	false	0	FARS2	0	0.571429
MOGS	phosphoinositide metabolic process	-0.59843	0.020105	2.14731	0.0013683	6.97733	322.033	0.00051145	0.143321	0	2	17	2.68397e-12	false	false	false	7.5	2	0	0	0.777078	3.14704	false	0	FAAH	172160	0.33
PIP4K2C	phosphoinositide metabolic process	-0.401636	0.0092481			5.98615	1527.5	0.00238706	0.167052	0.683333	16	14	6.19555e-06	false	false	false	17.125	16	0	0	0.688567	1.9401	false	0	HSD17B11	166412	0.338235
GDPD5	phosphoinositide metabolic process	0.766423	0.345671	2.39036	0.000215953	4.62972	1244.46	0.00196324	0.215996	0.6	6	12	4.56439e-08			false	9.16667	6	0	0	0.662678	1.80919	false	0	CBR1	20684	0.428571
PIGC	phosphoinositide metabolic process	0.378655	0.0194254			4.53275	37902.4	0.0592135	0.220617	0	5	12	5.52921e-06	false	false	false	8.6	5	0	0	0.764554	1.05741	false	0	CAT	0	0.786667
INPP5A	phosphoinositide metabolic process	-0.379545	0.0846382			6.21662	333.332	0.00052491	0.160859	0.819048	16	15	4.05596e-07	false	false	false	17.4667	16	0	0	0.730688	0.056516	false	0	TK1	4	0.444444
INPP1	phosphoinositide metabolic process	0.47368	0.00764367			6.00882	872.822	0.00138622	0.166422	0.8	11	15	3.48202e-07	false	false	false	18.6364	11	0	0	0.730688	9.14907	false	0	TK2	4	0.444444
ITPK1	phosphoinositide metabolic process	0.528299	0.0065781			5.73174	11826.9	0.018686	0.174467	0.563636	19	15	2.5407e-07	false	false	false	16.6364	19	0	2	0.713756	2.37164	false	0	BPGM	65258	0.277778
ITPKA	phosphoinositide metabolic process	-0.332095	0.806758	2.14731	0.0013683	6.78967	0.774411	1.23e-06	0.147283	0.954545	12	16	3.97796e-07			false	19.1667	12	0	0	0.72684	3.14704	false	0	TYMP	1354	0.306818
ITPKB	phosphoinositide metabolic process	0.0217679	0.967341	2.10914	0.00166905	6.78967	0.774411	1.23e-06	0.147283	0.954545	12	16	3.97796e-07			false	19.1667	12	0	0	0.752939	3.14704	false	0	ISYNA1	59784	0.349206
PLCD3	phosphoinositide metabolic process	-1.05723	0.00843394			6.48866	219.521	0.00034864	0.154115	0.714286	15	15	5.89303e-06	false	false	false	17.6	15	0	0	0.766233	2.46892	false	0	CDA	117348	0.390805
PLCD1	phosphoinositide metabolic process	-0.75659	0.576764	2.39036	0.000215953	6.48866	219.521	0.00034864	0.154115	0.714286	15	15	5.89303e-06			false	17.6	15	0	0	0.765743	0.700035	false	0	DGUOK	5488	0.648148
MOGAT2	phosphoinositide metabolic process	0.675887	0.269099	2.10914	0.00166905	5.6335	6368.69	0.0100633	0.177509	0.266667	6	12	8.5737e-13	false	false	false	12.1667	6	0	0	0.77302	5.49639	false	0	IMPA2	240042	0.358696
PIP5K1A	phosphoinositide metabolic process	-0.786443	0.00915449			6.10831	1260.67	0.00200612	0.163711	0.466667	10	15	4.19523e-07	false	false	false	13	10	0	0	0.695074	1.81591	false	0	PLCD3	4040	0.567742
PIP5K1C	phosphoinositide metabolic process	0.440514	0.0397694			6.10831	1260.67	0.00200612	0.163711	0.466667	10	15	4.19523e-07	false	false	false	13	10	0	0	0.695074	0.731625	false	0	PLCD1	4040	0.567742
PI4KB	phosphoinositide metabolic process	0.286339	0.0486517			5.15365	5455.08	0.00865015	0.194037	0.428571	7	14	5.6303e-06	false	false	false	10.2857	7	0	0	0.790372	1.81598	false	0	ABHD5	0	0.356481
PLCH2	phosphoinositide metabolic process	-0.0249765	0.98126	2.53097	7.1555e-05	5.88161	2813.67	0.00447059	0.170021	0.542105	25	15	6.07709e-06			false	15.55	25	0	0	0.816681	7.0347	false	0	GPAT2	886542	0.219128
PIP4K2A	phosphoinositide metabolic process	-1.33592	0.0565742	2.14731	0.0013683	5.63098	10344.1	0.0163916	0.177589	0.542484	18	14	0.000696855	false	false	false	22.3889	18	0	0	0.790372	1.5305	false	0	LCLAT1	0	0.356481
PMPCA	phosphoinositide metabolic process	-0.298428	0.04139			6.44207	138.672	0.00022024	0.15523	0.735294	17	15	6.07415e-06	false	false	false	17.4118	17	0	0	0.790372	0.0532782	false	0	MBOAT1	0	0.356481
OCRL	phosphoinositide metabolic process	-0.42988	0.0410556			6.04156	1342.31	0.00211889	0.16552	0.594203	26	15	6.18032e-06	false	false	false	15.8333	26	0	0	0.790372	2.77775	false	0	AGPAT2	0	0.356481
PIK3C2B	phosphoinositide metabolic process	0.7272	0.0350487			6.05793	815.503	0.00129653	0.165073	0.622222	10	15	4.27746e-07	false	false	false	17	10	0	0	0.790372	1.00548	false	0	AGPAT5	0	0.356481
INPP5J	phosphoinositide metabolic process	-2.249	0.058609	2.57677	5.52268e-05	6.0466	1027.12	0.00162122	0.165382	0.663158	22	15	5.99488e-06	false	false	false	16.4	22	0	1	0.79527	8.18515	false	0	LPCAT4	204140	0.182468
INPP5E	phosphoinositide metabolic process	0.516325	0.0197836			6.49496	29.6603	4.711e-05	0.153965	0.933333	10	15	5.87673e-06	false	false	false	19.7	10	0	0	0.792961	1.08051	false	0	PLA2G12A	533792	0.357456
SYNJ2	phosphoinositide metabolic process	-0.475956	0.0731555			6.04156	1342.31	0.00211889	0.16552	0.594203	26	15	6.18032e-06	false	false	false	15.8333	26	0	4	0.774419	4.11669	false	0	LCAT	163972	0.426667
INPP5B	phosphoinositide metabolic process	0.369172	0.0256539	2.10914	0.00166905	6.04156	1342.31	0.00211889	0.16552	0.594203	26	15	6.18032e-06	false	false	false	15.8333	26	0	1	0.79527	1.6257	false	0	LPCAT3	204140	0.182468
INPP5D	phosphoinositide metabolic process	-0.574448	0.421644	2.67158	2.25232e-05	6.21662	556.599	0.00087751	0.160859	0.698529	18	15	4.98933e-07			false	16.6471	18	0	0	0.792961	1.55674	false	0	PLA2G3	533792	0.357456
INPP5K	phosphoinositide metabolic process	0.612235	0.001801			6.04156	1342.31	0.00211889	0.16552	0.594203	26	15	6.18032e-06	false	false	false	15.8333	26	0	0	0.792961	3.72926	false	0	PLA2G4F	533792	0.357456
INPPL1	phosphoinositide metabolic process	0.0184072	0.910477	2.14731	0.0013683	6.21033	701.121	0.00110537	0.161022	0.652632	21	15	6.38489e-07			false	16.5	21	0	0	0.745102	0.127079	false	0	ODC1	37260	0.371429
INPP4A	phosphoinositide metabolic process	0.73147	0.00112703	2.00416	0.00355361	5.87531	2493.27	0.00392072	0.170204	0.641026	13	14	3.96167e-07	false	false	false	16.6923	13	0	1	0.736986	7.25406	false	0	PAOX	4694	0.5
DGKA	phosphoinositide metabolic process	0.426097	0.305744	2.00416	0.00355361	6.62972	0	0	0.150836	1	3	13	6.85897e-15			false	4	3	0	3	0.755528	0.531092	false	0	SAT2	50704	0.309524
DGKD	phosphoinositide metabolic process	-0.501533	0.0101584			6.62972	0	0	0.150836	1	3	13	6.85897e-15	false	false	false	4	3	0	0	0.756647	1.26782	false	0	SRM	114824	0.280702
DGKH	phosphoinositide metabolic process	-2.58954	0.00188914			6.62972	0	0	0.150836	1	3	13	6.85897e-15	false	false	false	4	3	0	0	0.760006	0.864312	false	0	HEXA	35396	0.297619
PARP1	protein amino acid adp ribosylation	-0.0430473	0.777544	2.00416	0.00355361	5.98615	0	0	0.167052	1	9	15	6.687e-12			false	9.66667	9	0	0	0.812343	0.565067	false	0	GDE1	633838	0.235521
PARP14	protein amino acid adp ribosylation	0.90035	0.0653228			5.98615	0	0	0.167052	1	9	15	6.687e-12	false	false	false	9.66667	9	0	2	0.725791	0.184734	false	0	IP6K2	0	0.547619
PARP2	protein amino acid adp ribosylation	-0.0706472	0.744544	2.00416	0.00355361	5.98615	0	0	0.167052	1	9	15	6.687e-12			false	9.66667	9	0	2	0.769941	2.44851	false	0	NUDT3	2168416	0.280702
PARP4	protein amino acid adp ribosylation	0.0587064	0.823479	2.29047	0.000496295	5.98615	0	0	0.167052	1	9	15	6.687e-12			false	9.66667	9	0	2	0.769941	0.864431	false	0	NUDT4	2168416	0.280702
PARP8	protein amino acid adp ribosylation	-2.72473	0.0977655			5.98615	0	0	0.167052	1	9	15	6.687e-12	false	false	false	9.66667	9	0	0	0.742583	3.00162	false	0	MOGAT2	300152	0.324324
PARP10	protein amino acid adp ribosylation	0.608389	0.0343976			5.98615	0	0	0.167052	1	9	15	6.687e-12	false	false	false	9.66667	9	0	0	0.712706	2.44851	false	0	AGMAT	0	0.8125
PARP11	protein amino acid adp ribosylation	-0.614163	0.0492537	2.00416	0.00355361	5.98615	0	0	0.167052	1	9	15	6.687e-12	false	false	false	9.66667	9	0	2	0.778827	3.26837	false	0	AOC3	163514	0.311429
PARP9	protein amino acid adp ribosylation	1.18042	0.010502			5.98615	0	0	0.167052	1	9	15	6.687e-12	false	false	false	9.66667	9	0	0	0.654142	1.81265	false	0	NQO2	44478	0.5
TNKS	protein amino acid adp ribosylation	-0.411967	0.00923376			5.98615	0	0	0.167052	1	9	15	6.687e-12	false	false	false	9.66667	9	0	0	0.598657	2.44851	false	0	NQO1	0	0
NAMPT	protein amino acid adp ribosylation	0.356522	0.0659934			4.99748	19028.5	0.0302826	0.200101	0.361905	15	14	7.95754e-10	false	false	false	9.26667	15	0	0	0.716205	1.75591	false	0	PIP5K1A	543784	0.464286
SRD5A3	protein amino acid linked glycosylation	-0.281292	0.0570557			5.72166	0	0	0.174774	0	1	15	4.77883e-11	false	false	false	10	1	0	0	0.716205	0.680841	false	0	PIP5K1C	543784	0.464286
DYRK1B	protein amino acid linked glycosylation	0.885524	0.0469894			7.24685	0	0	0.137991	1	5	13	7.66501e-16	false	false	false	8	5	0	0	0.769242	1.38664	false	0	PI4K2B	1140638	0.293878
DYRK3	protein amino acid linked glycosylation	0.313314	0.0922781			7.24685	0	0	0.137991	1	5	13	7.66501e-16	false	false	false	8	5	0	0	0.769242	0.533294	false	0	PI4KB	1140638	0.293878
TESK2	protein amino acid linked glycosylation	0.933443	0.00278514	2.29047	0.000496295	7.24685	0	0	0.137991	1	5	13	7.66501e-16	false	false	false	8	5	0	5	0.728799	5.30681	false	0	PLCH2	596232	0.471212
TESK1	protein amino acid linked glycosylation	-0.361416	0.0808611			7.24685	0	0	0.137991	1	5	13	7.66502e-16	false	false	false	8	5	0	0	0.742723	3.14704	false	0	PIP4K2A	527564	0.140461
CLK3	protein amino acid linked glycosylation	-0.278157	0.172749	2.29047	0.000496295	7.24685	0	0	0.137991	1	5	13	7.66502e-16			false	8	5	0	0	0.697663	0.651606	false	0	PMPCA	2172	0.544118
DOLK	protein amino acid linked glycosylation	0.717289	0.0203887			4.72292	1835.82	0.00290612	0.211733	0.733333	10	14	6.06912e-09	false	false	false	27.7	10	0	2	0.719913	0.657544	false	0	OCRL	550420	0.452381
MGEA5	protein amino acid linked glycosylation	-0.41766	0.0292872	2.57677	5.52268e-05	6.25315	17352	0.0249824	0.159919	0.342105	20	12	9.35136e-14	false	false	false	9.3	20	0	0	0.719004	0.773324	false	0	PIK3C2B	208542	0.548387
GALNT7	protein amino acid linked glycosylation	-0.82791	0.0347243			7.24685	0	0	0.137991	1	5	13	7.60211e-16	false	false	false	8	5	0	2	0.719633	5.49639	false	0	INPP5J	335324	0.468571
GALNT1	protein amino acid linked glycosylation	-0.338434	0.0216753			7.24685	0	0	0.137991	1	5	13	7.60211e-16	false	false	false	8	5	0	0	0.694724	1.19189	false	0	INPP5E	266	0.635484
GALNT2	protein amino acid linked glycosylation	-0.644504	0.0761292			7.24685	0	0	0.137991	1	5	13	7.60211e-16	false	false	false	8	5	0	2	0.719913	0.234747	false	0	SYNJ2	550420	0.452381
GALNT4	protein amino acid linked glycosylation	0.620027	0.0102433	2.00416	0.00355361	7.24685	0	0	0.137991	1	5	13	7.60211e-16	false	false	false	8	5	0	0	0.718304	3.88931	false	0	FIG4	0	0.568182
GALNT10	protein amino acid linked glycosylation	-0.470391	0.0252982			7.24685	0	0	0.137991	1	5	13	7.60211e-16	false	false	false	8	5	0	0	0.763224	1.74726	false	0	MTMR14	336362	0.294643
VRK3	protein amino acid phosphorylation	0.657877	0.0270608	2.39036	0.000215953	5.68766	0	0	0.175819	1	127	15	0.0883882	false	false	false	127.024	127	0	0	0.676812	1.73251	false	0	GPX6	0	0.438596
VRK2	protein amino acid phosphorylation	1.08378	0.0225972			5.68766	0	0	0.175819	1	127	15	0.0883882	false	false	false	127.024	127	0	0	0.698433	3.00162	false	0	ADI1	0	0.8125
WNK1	protein amino acid phosphorylation	-0.538778	0.00564308			5.68766	0	0	0.175819	1	127	15	0.0883882	false	false	false	127.024	127	0	0	0.676812	2.44851	false	0	GPX7	0	0.438596
WNK4	protein amino acid phosphorylation	-0.263098	0.2766	2.43362	0.000170083	5.68766	0	0	0.175819	1	127	15	0.0883882	false	false	false	127.024	127	0	0	0.791842	0.429516	false	0	ALKBH5	662130	0.388889
ULK1	protein amino acid phosphorylation	1.08858	0.00458198			5.68766	0	0	0.175819	1	127	15	0.0883882	false	false	false	127.024	127	0	0	0.791842	5.30681	false	0	ALKBH4	662130	0.388889
ULK2	protein amino acid phosphorylation	0.305065	0.122368	2.57677	5.52268e-05	5.68766	0	0	0.175819	1	127	15	0.0883882	false	false	false	127.024	127	0	0	0.791842	2.82398	false	0	ALKBH7	662130	0.388889
VRK1	protein amino acid phosphorylation	0.725418	0.0145267			5.68766	0	0	0.175819	1	127	15	0.0883882	false	false	false	127.024	127	0	0	0.676812	2.81173	false	0	GPX3	0	0.438596
STK3	protein amino acid phosphorylation	-0.828482	0.00331392	2.71993	1.70341e-05	5.68766	0	0	0.175819	1	127	15	0.0883882	false	false	false	127.024	127	0	2	0.719913	3.00162	false	0	INPP5B	550420	0.452381
STK4	protein amino acid phosphorylation	-0.564279	0.00789288			5.68766	0	0	0.175819	1	127	15	0.0883882	false	false	false	127.024	127	0	1	0.710188	-0.0456544	false	0	INPP5D	378582	0.537002
STK40	protein amino acid phosphorylation	-0.712302	0.0737491			5.68766	0	0	0.175819	1	127	15	0.0883882	false	false	false	127.024	127	0	2	0.719913	2.94593	false	0	INPP5K	550420	0.452381
TAOK2	protein amino acid phosphorylation	0.655008	0.00307597			5.68766	0	0	0.175819	1	127	15	0.0883882	false	false	false	127.024	127	0	1	0.710537	1.65343	false	0	INPPL1	486918	0.5
TAOK1	protein amino acid phosphorylation	-0.549764	0.00653361			5.68766	0	0	0.175819	1	127	15	0.0883882	false	false	false	127.024	127	0	0	0.687378	1.13762	false	0	DHCR24	563654	0.365079
STK36	protein amino acid phosphorylation	1.16516	0.0724008			5.68766	0	0	0.175819	1	127	15	0.0883882	false	false	false	127.024	127	0	0	0.685838	0.573056	false	0	GSTT1	0	0.57438
STK35	protein amino acid phosphorylation	0.620287	0.00409843	2.53097	7.1555e-05	5.68766	0	0	0.175819	1	127	15	0.0883882	false	false	false	127.024	127	0	0	0.685838	2.15504	false	0	MGST3	0	0.57438
TRPM7	protein amino acid phosphorylation	0.349964	0.0809798			5.68766	0	0	0.175819	1	127	15	0.0883882	false	false	false	127.024	127	0	0	0.729149	3.28902	false	0	INPP4A	114550	0.53598
TSSK3	protein amino acid phosphorylation	0.0187787	0.989348	2.39036	0.000215953	5.68766	0	0	0.175819	1	127	15	0.0883882	false	false	false	127.024	127	0	0	0.700532	0.239058	false	0	GSTM2	50866	0.427778
TTBK1	protein amino acid phosphorylation	2.48349	0.00479371			5.68766	0	0	0.175819	1	127	15	0.0883882	false	false	false	127.024	127	0	0	0.700532	0.0502421	false	0	GSTM4	50866	0.427778
TBK1	protein amino acid phosphorylation	-0.315595	0.0453584			5.68766	0	0	0.175819	1	127	15	0.0883882	false	false	false	127.024	127	0	0	0.700532	3.88931	false	0	GSTP1	50866	0.427778
TAOK3	protein amino acid phosphorylation	0.319712	0.0568217			5.68766	0	0	0.175819	1	127	15	0.0883882	false	false	false	127.024	127	0	0	0.736496	3.00162	false	0	AGPS	0	0
TLK2	protein amino acid phosphorylation	-0.730466	0.0110324			5.68766	0	0	0.175819	1	127	15	0.0883882	false	false	false	127.024	127	0	0	0.700532	4.82157	false	0	GSTA2	50866	0.427778
TLK1	protein amino acid phosphorylation	0.0408476	0.743589	2.00416	0.00355361	5.68766	0	0	0.175819	1	127	15	0.0883882			false	127.024	127	0	0	0.654072	4.67311	false	0	ENPP1	0	0.75
TNIK	protein amino acid phosphorylation	-0.0473959	0.930037	2.24975	0.000617604	5.68766	0	0	0.175819	1	127	15	0.0883882			false	127.024	127	0	0	0.700532	3.08794	false	0	GSTA4	50866	0.427778
TRIO	protein amino acid phosphorylation	-0.616255	0.00758003			5.68766	0	0	0.175819	1	127	15	0.0883882	false	false	false	127.024	127	0	0	0.700532	2.24232	false	0	GSTA3	50866	0.427778
GAK	protein amino acid phosphorylation	-0.228149	0.183866	2.43362	0.000170083	5.68766	0	0	0.175819	1	127	15	0.0883882			false	127.024	127	0	0	0.654072	0.750626	false	0	ENPP3	0	0.75
HIPK1	protein amino acid phosphorylation	0.0813893	0.479262	2.00416	0.00355361	5.68766	0	0	0.175819	1	127	15	0.0883882			false	127.024	127	0	0	0.700532	1.39486	false	0	GSTK1	50866	0.427778
HIPK2	protein amino acid phosphorylation	-0.559821	0.0941815			5.68766	0	0	0.175819	1	127	15	0.0883882	false	false	false	127.024	127	0	0	0.709488	1.99123	false	0	NNT	88952	0.5
DCLK3	protein amino acid phosphorylation	3.4725	0.00543959			5.68766	0	0	0.175819	1	127	15	0.0883882	false	false	false	127.024	127	0	0	0.708788	5.86705	false	0	GGT6	10388	0.384615
EIF2AK2	protein amino acid phosphorylation	0.0637145	0.783955	2.00416	0.00355361	5.68766	0	0	0.175819	1	127	15	0.0883882			false	127.024	127	0	0	0.708788	4.49834	false	0	GGT7	10388	0.384615
EIF2AK1	protein amino acid phosphorylation	-0.136121	0.333434	2.14731	0.0013683	5.68766	0	0	0.175819	1	127	15	0.0883882			false	127.024	127	0	0	0.633921	2.99219	false	0	CARS	0	0
EIF2AK4	protein amino acid phosphorylation	-0.388454	0.103155	2.14731	0.0013683	5.68766	0	0	0.175819	1	127	15	0.0883882	false	false	false	127.024	127	0	0	0.700532	1.26679	false	0	MGST1	50866	0.427778
EIF2AK3	protein amino acid phosphorylation	0.399119	0.0958911			5.68766	0	0	0.175819	1	127	15	0.0883882	false	false	false	127.024	127	0	0	0.74958	1.90917	false	0	PRDX1	0	0.566667
ERN1	protein amino acid phosphorylation	-0.671356	0.0989259			5.68766	0	0	0.175819	1	127	15	0.0883882	false	false	false	127.024	127	0	0	0.743493	3.52409	false	0	MCEE	10058	0.333333
LMTK2	protein amino acid phosphorylation	-0.0816733	0.508988	2.24975	0.000617604	5.68766	0	0	0.175819	1	127	15	0.0883882			false	127.024	127	0	0	0.74958	0.904736	false	0	PRDX2	0	0.566667
LIMK2	protein amino acid phosphorylation	-0.301416	0.0836271			5.68766	0	0	0.175819	1	127	15	0.0883882	false	false	false	127.024	127	0	0	0.774699	1.30054	false	0	DBT	200518	0.388889
MAP3K10	protein amino acid phosphorylation	0.265397	0.07437			5.68766	0	0	0.175819	1	127	15	0.0883882	false	false	false	127.024	127	0	0	0.757067	2.44851	false	0	LDHD	891800	0.5
LRRK2	protein amino acid phosphorylation	0.41368	0.617668	2.10914	0.00166905	5.68766	0	0	0.175819	1	127	15	0.0883882			false	127.024	127	0	0	0.70494	2.84801	false	0	MUT	696	0.5
MAP3K12	protein amino acid phosphorylation	0.223701	0.479226	2.14731	0.0013683	5.68766	0	0	0.175819	1	127	15	0.0883882	false	false	false	127.024	127	0	0	0.762315	0.32965	false	0	RNLS	0	0.75
IRAK1	protein amino acid phosphorylation	-0.337965	0.0102046			5.68766	0	0	0.175819	1	127	15	0.0883882	false	false	false	127.024	127	0	0	0.670725	3.26275	false	0	CACNB2	0	0.892857
IRAK4	protein amino acid phosphorylation	0.312531	0.0957602			5.68766	0	0	0.175819	1	127	15	0.0883882	false	false	false	127.024	127	0	0	0.670725	0.459956	false	0	CACNB4	0	0.892857
KALRN	protein amino acid phosphorylation	0.992164	0.0408316			5.68766	0	0	0.175819	1	127	15	0.0883882	false	false	false	127.024	127	0	0	0.670725	1.65343	false	0	CACNB3	0	0.892857
CDK8	protein amino acid phosphorylation	-0.228617	0.0911772			5.68766	0	0	0.175819	1	127	15	0.0883882	false	false	false	127.024	127	0	1	0.737406	0.926765	false	0	GLO1	89006	0.5
CDKL2	protein amino acid phosphorylation	0.00866898	0.971446	2.00416	0.00355361	5.68766	0	0	0.175819	1	127	15	0.0883882			false	127.024	127	0	0	0.670725	2.24855	false	0	CACNA1G	0	0.892857
CDK9	protein amino acid phosphorylation	-0.0842338	0.562653	2.57677	5.52268e-05	5.68766	0	0	0.175819	1	127	15	0.0883882			false	127.024	127	0	1	0.732158	4.67311	false	0	HAGH	1069778	0.328947
CDKL5	protein amino acid phosphorylation	0.457117	0.0256038			5.68766	0	0	0.175819	1	127	15	0.0883882	false	false	false	127.024	127	0	0	0.670725	0.593757	false	0	ORAI1	0	0.892857
CHEK2	protein amino acid phosphorylation	1.53555	0.00447782			5.68766	0	0	0.175819	1	127	15	0.0883882	false	false	false	127.024	127	0	0	0.736146	0.544642	false	0	CRAT	4	0.809524
CDC42BPA	protein amino acid phosphorylation	-0.593424	0.00975281	2.00416	0.00355361	5.68766	0	0	0.175819	1	127	15	0.0883882	false	false	false	127.024	127	0	0	0.670725	2.89185	false	0	TPCN1	0	0.892857
CASK	protein amino acid phosphorylation	-0.737715	0.00562373			5.68766	0	0	0.175819	1	127	15	0.0883882	false	false	false	127.024	127	0	0	0.670725	4.67311	false	0	TMEM37	0	0.892857
CDC42BPB	protein amino acid phosphorylation	0.290967	0.0136137	2.00416	0.00355361	5.68766	0	0	0.175819	1	127	15	0.0883882	false	false	false	127.024	127	0	0	0.670725	7.25406	false	0	TPCN2	0	0.892857
CDC7	protein amino acid phosphorylation	0.22025	0.589881	2.14731	0.0013683	5.68766	0	0	0.175819	1	127	15	0.0883882			false	127.024	127	0	0	0.77232	2.87004	false	0	BBOX1	10378	0.394737
CDK1	protein amino acid phosphorylation	1.15302	0.410831	2.24975	0.000617604	5.68766	0	0	0.175819	1	127	15	0.0883882			false	127.024	127	0	0	0.791422	3.32926	false	0	CPT1A	852578	0.238095
DAPK1	protein amino acid phosphorylation	0.303238	0.047059			5.68766	0	0	0.175819	1	127	15	0.0883882	false	false	false	127.024	127	0	0	0.791422	0.767265	false	0	CPT1C	852578	0.238095
CSNK2A2	protein amino acid phosphorylation	-0.463106	0.0283247			5.68766	0	0	0.175819	1	127	15	0.0883882	false	false	false	127.024	127	0	0	0.670725	1.11411	false	0	CACNG7	0	0.892857
DAPK2	protein amino acid phosphorylation	1.01203	0.0393698			5.68766	0	0	0.175819	1	127	15	0.0883882	false	false	false	127.024	127	0	0	0.739575	0.961989	false	0	BDH1	216406	0.4
DCLK2	protein amino acid phosphorylation	1.30594	0.0941961			5.68766	0	0	0.175819	1	127	15	0.0883882	false	false	false	127.024	127	0	0	0.739575	0.117063	false	0	BDH2	216406	0.4
CSNK1A1	protein amino acid phosphorylation	-0.471844	0.0259072			5.68766	0	0	0.175819	1	127	15	0.0883882	false	false	false	127.024	127	0	0	0.585013	1.04841	false	0	PMVK	439212	0.5
CSNK1E	protein amino acid phosphorylation	-0.741721	0.00162302	2.00416	0.00355361	5.68766	0	0	0.175819	1	127	15	0.0883882	false	false	false	127.024	127	0	0	0.639659	2.578	false	0	MVK	512400	0.5
CSNK1G2	protein amino acid phosphorylation	0.420191	0.0151356			5.68766	0	0	0.175819	1	127	15	0.0883882	false	false	false	127.024	127	0	0	0.670725	0.939406	false	0	CACNA1A	0	0.892857
AAK1	protein amino acid phosphorylation	-0.513269	0.00808209	2.10914	0.00166905	5.68766	0	0	0.175819	1	127	15	0.0883882	false	false	false	127.024	127	0	0	0.530227	2.44851	false	0	MVD	366028	0.333333
AATK	protein amino acid phosphorylation	-0.805526	0.431991	3.37462	3.47752e-08	5.68766	0	0	0.175819	1	127	15	0.0883882	false	false	false	127.024	127	0	0	0.708718	6.35728	false	0	ASS1	149636	0.386364
ACVR2A	protein amino acid phosphorylation	-0.388092	0.0336912			5.6864	1592	0.00251889	0.175858	0.984375	128	15	0.0883936	false	false	false	126.031	128	0	0	0.77225	2.37463	false	0	ARG1	104058	0.281843
AKT1	protein amino acid phosphorylation	0.185832	0.191599	3.0934	5.28056e-07	5.68766	0	0	0.175819	1	127	15	0.0883882			false	127.024	127	0	0	0.747061	2.44851	false	0	ASL	110094	0.331933
ACVRL1	protein amino acid phosphorylation	0.237391	0.541842	2.24975	0.000617604	5.68766	0	0	0.175819	1	127	15	0.0883882			false	127.024	127	0	0	0.758186	0.297026	false	0	UPB1	23886	0.5
AKT3	protein amino acid phosphorylation	-0.306923	0.573243	2.10914	0.00166905	5.68766	0	0	0.175819	1	127	15	0.0883882			false	127.024	127	0	0	0.729359	1.94222	false	0	PSAT1	34598	0.5
AKT2	protein amino acid phosphorylation	0.191661	0.159852	2.14731	0.0013683	5.68766	0	0	0.175819	1	127	15	0.0883882			false	127.024	127	0	0	0.75035	2.44851	false	0	HADH	66192	0.375
BMP2K	protein amino acid phosphorylation	-0.303839	0.0786575			5.68766	0	0	0.175819	1	127	15	0.0883882	false	false	false	127.024	127	0	0	0.74944	1.29918	false	0	MGAT4B	11724	0.458333
BCR	protein amino acid phosphorylation	0.58826	0.0118828			5.68766	0	0	0.175819	1	127	15	0.0883882	false	false	false	127.024	127	0	0	0.684159	0.285883	false	0	ADHFE1	0	1
BRAF	protein amino acid phosphorylation	-0.494493	0.0194278			5.68766	0	0	0.175819	1	127	15	0.0883882	false	false	false	127.024	127	0	0	0.762175	1.6041	false	0	ACAA2	168846	0.215774
BUB1B	protein amino acid phosphorylation	0.803148	0.213966	2.10914	0.00166905	5.68766	0	0	0.175819	1	127	15	0.0883882	false	false	false	127.024	127	0	0	0.687238	2.44851	false	0	DGKA	0	0.666667
AMHR2	protein amino acid phosphorylation	-1.56676	0.284607	2.14731	0.0013683	5.68766	0	0	0.175819	1	127	15	0.0883882			false	127.024	127	0	0	0.687238	1.67975	false	0	DGKD	0	0.666667
ATM	protein amino acid phosphorylation	0.68396	0.0213399	2.14731	0.0013683	5.68766	0	0	0.175819	1	127	15	0.0883882	false	false	false	127.024	127	0	0	0.687238	2.91096	false	0	DGKH	0	0.666667
AURKA	protein amino acid phosphorylation	1.31871	0.00782026			5.68766	0	0	0.175819	1	127	15	0.0883882	false	false	false	127.024	127	0	0	0.75084	4.67311	false	0	ME2	0	0
ATR	protein amino acid phosphorylation	-0.765618	0.00966744	2.71993	1.70341e-05	5.68766	0	0	0.175819	1	127	15	0.0883882	false	false	false	127.024	127	0	0	0.776798	3.72926	false	0	ALDH6A1	414888	0.207364
RPS6KB2	protein amino acid phosphorylation	0.548305	0.050568	2.57677	5.52268e-05	5.68766	0	0	0.175819	1	127	15	0.0883882	false	false	false	127.024	127	0	0	0.730269	0.236051	false	0	MDH1	303408	0.569444
SBK1	protein amino acid phosphorylation	1.91219	0.00285736			5.68766	0	0	0.175819	1	127	15	0.0883882	false	false	false	127.024	127	0	0	0.730269	0.411065	false	0	MDH2	303408	0.569444
SGK2	protein amino acid phosphorylation	1.28123	0.00108093			5.68766	0	0	0.175819	1	127	15	0.0883882	false	false	false	127.024	127	0	0	0.77246	2.25396	false	0	PCCA	324624	0.264103
ROCK2	protein amino acid phosphorylation	-0.422969	0.0294043			5.68766	0	0	0.175819	1	127	15	0.0883882	false	false	false	127.024	127	0	0	0.744123	2.84034	false	0	BCAT2	71896	0.560345
ROCK1	protein amino acid phosphorylation	-0.210787	0.073477			5.68766	0	0	0.175819	1	127	15	0.0883882	false	false	false	127.024	127	0	0	0.775189	2.37524	false	0	CAD	591568	0.267477
RPS6KA4	protein amino acid phosphorylation	-0.569533	0.0401068			5.68766	0	0	0.175819	1	127	15	0.0883882	false	false	false	127.024	127	0	0	0.803736	3.85625	false	0	ABAT	457428	0.176871
RPS6KA3	protein amino acid phosphorylation	-0.98395	0.00426237			5.68766	0	0	0.175819	1	127	15	0.0883882	false	false	false	127.024	127	0	0	0.631892	3.88931	false	0	LSS	0	0
STK16	protein amino acid phosphorylation	0.662828	0.0109864	2.14731	0.0013683	5.68766	0	0	0.175819	1	127	15	0.0883882	false	false	false	127.024	127	0	1	0.736426	7.25406	false	0	ECHS1	909292	0.272727
STK11	protein amino acid phosphorylation	0.326052	0.0213823			5.68766	0	0	0.175819	1	127	15	0.0883882	false	false	false	127.024	127	0	0	0.758886	0.677327	false	0	NOS3	118068	0.406863
SGK3	protein amino acid phosphorylation	-0.157569	0.347908	2.43362	0.000170083	5.68766	0	0	0.175819	1	127	15	0.0883882	false	false	false	127.024	127	0	0	0.75098	0.0956823	false	0	ECHDC1	0	0.567308
SIK3	protein amino acid phosphorylation	0.0710517	0.683586	2.00416	0.00355361	5.68766	0	0	0.175819	1	127	15	0.0883882			false	127.024	127	0	0	0.756367	0.0494314	false	0	ACOT7	39850	0.295238
SNRK	protein amino acid phosphorylation	1.02776	0.00121934			5.68766	0	0	0.175819	1	127	15	0.0883882	false	false	false	127.024	127	0	0	0.81766	0.917057	false	0	ALDH3A2	933874	0.137879
SLK	protein amino acid phosphorylation	-0.53859	0.000846412			5.68766	0	0	0.175819	1	127	15	0.0883882	false	false	false	127.024	127	0	0	0.763294	0.783851	false	0	COMT	42	0.642857
SRPK1	protein amino acid phosphorylation	-0.400457	0.00295816	2.29047	0.000496295	5.68766	0	0	0.175819	1	127	15	0.0883882	false	false	false	127.024	127	0	1	0.674643	6.35728	false	0	KMO	0	0.6
PRKCH	protein amino acid phosphorylation	-0.73212	0.130985	2.10914	0.00166905	5.68766	0	0	0.175819	1	127	15	0.0883882	false	false	false	127.024	127	0	0	0.81745	1.64309	false	0	SLC27A2	1679800	0.118929
PRKCZ	protein amino acid phosphorylation	0.481007	0.05245			5.68766	0	0	0.175819	1	127	15	0.0883882	false	false	false	127.024	127	0	0	0.742653	1.48726	false	0	HSD17B4	1486780	0.243243
PLK3	protein amino acid phosphorylation	0.601505	0.0695432			5.68766	0	0	0.175819	1	127	15	0.0883882	false	false	false	127.024	127	0	0	0.764973	3.59991	false	0	AMACR	0	0.560606
PLK4	protein amino acid phosphorylation	-0.348646	0.145724	2.00416	0.00355361	5.68766	0	0	0.175819	1	127	15	0.0883882	false	false	false	127.024	127	0	0	0.8171	2.5468	false	0	ACSL1	2372174	0.115685
PRKCD	protein amino acid phosphorylation	-0.424132	0.0625667	2.43362	0.000170083	5.68766	0	0	0.175819	1	127	15	0.0883882	false	false	false	127.024	127	0	0	0.689407	1.05019	false	0	PCYOX1	635984	0.2
RIOK1	protein amino acid phosphorylation	-0.416165	0.0553405	2.43362	0.000170083	5.68766	0	0	0.175819	1	127	15	0.0883882	false	false	false	127.024	127	0	0	0.77351	0.219962	false	0	ACOX2	786746	0.276768
RAF1	protein amino acid phosphorylation	0.775859	0.0044244	2.14731	0.0013683	5.68766	0	0	0.175819	1	127	15	0.0883882	false	false	false	127.024	127	0	0	0.695564	3.32057	false	0	HPD	36520	0.466667
RIOK3	protein amino acid phosphorylation	-0.920556	0.00419312			5.68766	0	0	0.175819	1	127	15	0.0883882	false	false	false	127.024	127	0	2	0.799398	2.7718	false	0	ACAT1	679698	0.157197
RIOK2	protein amino acid phosphorylation	0.771643	0.00443343			5.68766	0	0	0.175819	1	127	15	0.0883882	false	false	false	127.024	127	0	2	0.799398	1.37912	false	0	ACAT2	679698	0.157197
RIPK1	protein amino acid phosphorylation	0.548224	0.00505773	2.29047	0.000496295	5.68766	0	0	0.175819	1	127	15	0.0883882	false	false	false	127.024	127	0	4	0.747831	2.04803	false	0	MTHFD1L	447258	0.255263
PRKD2	protein amino acid phosphorylation	0.562572	0.151229	2.29047	0.000496295	5.68766	0	0	0.175819	1	127	15	0.0883882	false	false	false	127.024	127	0	0	0.734677	5.30681	false	0	MTR	2708518	0.218803
OXSR1	protein amino acid phosphorylation	-0.575988	0.0964518			5.68766	0	0	0.175819	1	127	15	0.0883882	false	false	false	127.024	127	0	0	0.719703	1.54294	false	0	CPS1	0	0
PAK1	protein amino acid phosphorylation	0.7975	0.0843921			5.68766	0	0	0.175819	1	127	15	0.0883882	false	false	false	127.024	127	0	0	0.721942	3.14704	false	0	MTHFR	0	0.54023
PACSIN3	protein amino acid phosphorylation	0.341249	0.0378911	2.4044	0.00019982	5.68766	0	0	0.175819	1	127	15	0.0883882	false	false	false	127.024	127	0	1	0.776099	3.00446	false	0	SHMT1	1107212	0.138675
PAK3	protein amino acid phosphorylation	-1.93206	0.0917332			5.68766	0	0	0.175819	1	127	15	0.0883882	false	false	false	127.024	127	0	0	0.753149	2.05348	false	0	SARDH	378418	0.277778
PAK2	protein amino acid phosphorylation	-0.720496	0.00324444			5.68766	0	0	0.175819	1	127	15	0.0883882	false	false	false	127.024	127	0	0	0.698363	3.00162	false	0	MTHFS	0	0
NEK9	protein amino acid phosphorylation	-0.33732	0.0320518			5.68766	0	0	0.175819	1	127	15	0.0883882	false	false	false	127.024	127	0	1	0.747831	2.09828	false	0	AMT	422278	0.260526
PIM1	protein amino acid phosphorylation	0.618826	0.0281935	2.14731	0.0013683	5.68766	0	0	0.175819	1	127	15	0.0883882	false	false	false	127.024	127	0	2	0.781276	2.16454	false	0	ATIC	3687106	0.209936
PINK1	protein amino acid phosphorylation	0.507531	0.00152913			5.68766	0	0	0.175819	1	127	15	0.0883882	false	false	false	127.024	127	0	0	0.72803	1.58766	false	0	DHFR	4314	0.418719
PKN2	protein amino acid phosphorylation	-0.541653	0.00299398			5.68766	0	0	0.175819	1	127	15	0.0883882	false	false	false	127.024	127	0	2	0.7281	0.845889	false	0	ALDH1L2	4314	0.400862
PLK1	protein amino acid phosphorylation	0.978992	0.254314	2.29047	0.000496295	5.68766	0	0	0.175819	1	127	15	0.0883882	false	false	false	127.024	127	0	2	0.7281	3.55266	false	0	ALDH1L1	4314	0.400862
PKN3	protein amino acid phosphorylation	1.24478	0.0489184			5.68766	0	0	0.175819	1	127	15	0.0883882	false	false	false	127.024	127	0	1	0.741884	1.98083	false	0	ACOT1	166	0.363636
PAK6	protein amino acid phosphorylation	-2.44557	0.0230079	2.24975	0.000617604	5.68766	0	0	0.175819	1	127	15	0.0883882	false	false	false	127.024	127	0	0	0.79534	3.2533	false	0	ACSM3	1611774	0.111893
PAK4	protein amino acid phosphorylation	0.514034	0.00683666			5.68766	0	0	0.175819	1	127	15	0.0883882	false	false	false	127.024	127	0	0	0.79534	2.09476	false	0	ACSM5	1611774	0.111893
PDIK1L	protein amino acid phosphorylation	0.191708	0.22692	2.10914	0.00166905	5.68766	0	0	0.175819	1	127	15	0.0883882			false	127.024	127	0	0	0.812133	3.88931	false	0	ALDH2	642308	0.151196
PIK3R4	protein amino acid phosphorylation	0.514529	0.00547371			4.84887	173146	0.273774	0.206234	0.969113	129	14	0.088399	false	false	false	125.24	129	0	0	0.781836	1.79213	false	0	SGPL1	216536	0.298077
MARCKS	protein amino acid phosphorylation	-0.580601	0.323847	2.14731	0.0013683	5.68766	0	0	0.175819	1	127	15	0.0883882			false	127.024	127	0	0	0.748041	0.473984	false	0	FTCD	491988	0.288462
MARK3	protein amino acid phosphorylation	0.530979	0.017936	2.43362	0.000170083	5.68766	0	0	0.175819	1	127	15	0.0883882	false	false	false	127.024	127	0	0	0.760845	3.14704	false	0	DMGDH	693344	0.263415
MARK4	protein amino acid phosphorylation	-0.570587	0.00380007			5.68766	0	0	0.175819	1	127	15	0.0883882	false	false	false	127.024	127	0	6	0.753848	0.508296	false	0	MTHFD1	527118	0.199695
MAST3	protein amino acid phosphorylation	1.21661	0.025053			5.68766	0	0	0.175819	1	127	15	0.0883882	false	false	false	127.024	127	0	1	0.720963	0.776403	false	0	MTHFD2L	0	0.64
MAP4K2	protein amino acid phosphorylation	0.18138	0.606609	2.29047	0.000496295	5.68766	0	0	0.175819	1	127	15	0.0883882	false	false	false	127.024	127	0	1	0.721033	4.67311	false	0	MTHFD2	2	0.58
MAP4K4	protein amino acid phosphorylation	-1.12617	0.00849282			5.68766	0	0	0.175819	1	127	15	0.0883882	false	false	false	127.024	127	0	0	0.748531	0.812215	false	0	HMGCS2	748656	0.325758
MAP4K3	protein amino acid phosphorylation	-0.314486	0.0736605			5.68766	0	0	0.175819	1	127	15	0.0883882	false	false	false	127.024	127	0	3	0.721103	3.72926	false	0	GNPDA2	36764	0.605769
MAPKAPK2	protein amino acid phosphorylation	-0.489457	0.00989695	2.00416	0.00355361	5.68766	0	0	0.175819	1	127	15	0.0883882	false	false	false	127.024	127	0	1	0.721103	1.63041	false	0	PFKFB1	36764	0.605769
MAP4K5	protein amino acid phosphorylation	-0.570323	0.0220937			5.68766	0	0	0.175819	1	127	15	0.0883882	false	false	false	127.024	127	0	1	0.721103	2.02716	false	0	PFKFB2	36764	0.605769
MAPKAPK3	protein amino acid phosphorylation	-0.580489	0.0104174			5.68766	0	0	0.175819	1	127	15	0.0883882	false	false	false	127.024	127	0	1	0.721103	0.84665	false	0	PFKFB4	36764	0.605769
NEK2	protein amino acid phosphorylation	1.33021	0.00802658	2.29047	0.000496295	5.68766	0	0	0.175819	1	127	15	0.0883882	false	false	false	127.024	127	0	0	0.712287	1.22782	false	0	HMGCL	137380	0.515152
MAST4	protein amino acid phosphorylation	-0.117338	0.576553	2.10914	0.00166905	5.68766	0	0	0.175819	1	127	15	0.0883882			false	127.024	127	0	0	0.694165	0.166242	false	0	HMGCR	585584	0.5
MKNK2	protein amino acid phosphorylation	0.601842	0.00611361			5.68766	0	0	0.175819	1	127	15	0.0883882	false	false	false	127.024	127	0	0	0.763224	6.15284	false	0	GFPT2	313516	0.251064
MKNK1	protein amino acid phosphorylation	-1.13615	0.0294374	2.14731	0.0013683	5.68766	0	0	0.175819	1	127	15	0.0883882	false	false	false	127.024	127	0	0	0.712566	2.44851	false	0	PFKM	3936	0.611111
MTOR	protein amino acid phosphorylation	0.392401	0.0980933			5.68766	0	0	0.175819	1	127	15	0.0883882	false	false	false	127.024	127	0	0	0.712566	0.161209	false	0	PFKP	3936	0.611111
ZFYVE16	protein amino acid phosphorylation	-0.864325	0.00082269			6.68514	0	0	0.149586	0	1	16	0.000696012	false	false	false	128	1	0	0	0.693955	0.641749	false	0	MAN2A2	0	0
YWHAG	protein amino acid phosphorylation	-0.566952	0.0277637	2.39036	0.000215953	5.68766	0	0	0.175819	1	127	15	0.0883882	false	false	false	127.024	127	0	0	0.768402	0.0801524	false	0	SMPD2	83234	0.372671
PUS1	RNA modification	-0.778517	0.00905359			6.15617	0	0	0.162439	0	1	15	6.24067e-12	false	false	false	5	1	0	0	0.768402	0.0201178	false	0	SMPD1	83234	0.372671
PUS7	RNA modification	-0.857592	0.00836423	2.00416	0.00355361	5.15743	1963.84	0.0031051	0.193895	0.2	5	14	7.92567e-10	false	false	false	11	5	0	0	0.768402	0.502246	false	0	SMPD3	83234	0.372671
HSD17B2	sterol and vitamin metabolic process	-0.36594	0.274759	2.00416	0.00355361	7.57935	23.3667	3.711e-05	0.131938	0.666667	3	12	2.22168e-17			false	4	3	0	0	0.75021	0.100003	false	0	EXT1	585216	0.336842
HSD17B6	sterol and vitamin metabolic process	-1.20112	0.16748	2.00416	0.00355361	6.99874	117.226	0.00018618	0.142883	0.333333	3	12	2.01436e-16	false	false	false	4	3	0	0	0.7493	3.88931	false	0	GCNT4	11720	0.568627
IDI1	sterol and vitamin metabolic process	0.70337	0.0365305			10.4547	1592	0	0.0956511	0	1	15	7.1658e-24	false	false	false	3	1	0	0	0.784425	0.952902	false	0	FUT1	74868	0.543771
SOAT1	sterol and vitamin metabolic process	0.0971032	0.893964	2.71993	1.70341e-05	5.66121	4346.75	0.00687843	0.176641	0.6	5	12	6.68456e-13			false	15	5	0	0	0.698013	2.24829	false	0	KHK	0	0
RBP4	sterol and vitamin metabolic process	-0.770162	0.0295151			6.07305	1343.03	0.00212839	0.164662	0.6	5	12	2.42392e-14	false	false	false	5.6	5	0	0	0.748251	2.44851	false	0	B4GALT3	135192	0.34
RDH11	sterol and vitamin metabolic process	0.550994	0.0366795			6.0806	1.83333	2.91e-06	0.164457	0.9	5	12	2.44271e-14	false	false	false	5.8	5	0	1	0.776448	3.20622	false	0	ST6GALNAC6	0	0.717949
DHRS3	sterol and vitamin metabolic process	1.3203	0.0117516			6.0806	1.83333	2.91e-06	0.164457	0.9	5	12	2.44271e-14	false	false	false	5.8	5	0	0	0.776518	4.49834	false	0	ST8SIA3	0	0.586538
DHRS4	sterol and vitamin metabolic process	0.213094	0.25511	2.29047	0.000496295	6.07683	4765.83	0.00754053	0.16456	0.47619	7	12	2.44299e-14			false	4.57143	7	0	0	0.779947	3.88931	false	0	ST6GAL1	103508	0.642857
ABCA4	sterol and vitamin metabolic process	-1.32597	0.0390751			6.08564	0	0	0.164321	1	4	12	2.42373e-14	false	false	false	6.25	4	0	1	0.753498	0.83875	false	0	ALDOA	100952	0.277778
DHCR7	sterol and vitamin metabolic process	1.24284	0.00503926	2.00416	0.00355361	6.64358	1494.58	0.00236585	0.150521	0.5	5	13	1.06132e-14	false	false	false	4.4	5	0	0	0.775959	0.855472	false	0	ST3GAL1	0	0.733333
SC5D	sterol and vitamin metabolic process	1.02047	0.00280838			7.53904	6.55531	1.041e-05	0.132643	0.666667	3	13	1.67934e-16	false	false	false	5	3	0	0	0.74944	0.752781	false	0	MGAT2	63894	0.441176
COQ2	sterol and vitamin metabolic process	-0.562811	0.00610833			11.4408	3180	0.00503143	0.0874064	0	2	16	1.13491e-25	false	false	false	2	2	0	1	0.780157	5.41801	false	0	ST3GAL3	104132	0.392857
NSDHL	sterol and vitamin metabolic process	1.13441	0.0167181			7.60327	0	0	0.131522	0	1	12	1.03731e-17	false	false	false	5	1	0	0	0.776588	1.31279	false	0	ST3GAL4	24	0.484615
COQ6	sterol and vitamin metabolic process	0.147609	0.533302	2.00416	0.00355361	12.437	1592	0.00251889	0.0804051	0	2	17	4.04137e-27			false	1.5	2	0	0	0.74965	0.424832	false	0	FUCA2	27260	0.5
COQ5	sterol and vitamin metabolic process	-0.269916	0.0460187	2.43362	0.000170083	13.4358	0	0	0.0744282	0	1	18	1.5947e-29			false	2	1	0	0	0.764624	2.89752	false	0	NMNAT1	185346	0.227273
EBP	sterol and vitamin metabolic process	0.598155	0.00687188			7.34887	264.447	0.00041593	0.136075	0.333333	3	12	9.53017e-17	false	false	false	5	3	0	0	0.764624	1.32168	false	0	NMNAT3	185346	0.227273
PDSS1	sterol and vitamin metabolic process	-0.413941	0.0482169			10.4471	4764	0.00753762	0.0957203	0	2	15	7.16414e-24	false	false	false	2.5	2	0	0	0.74965	1.07748	false	0	PHKB	41108	0.252492
CBR3	sterol and vitamin metabolic process	1.49411	0.0236288			7.07305	0	0	0.141382	1	2	13	1.9383e-16			false	5	2	0	0	0.722502	4.49834	false	0	PPA2	52446	0.538462
HSD17B7	sterol and vitamin metabolic process	0.306685	0.0842964			6.60453	3110.64	0.00491907	0.151411	0.2	5	11	1.32016e-15	false	false	false	4.6	5	0	0	0.722502	3.14704	false	0	LHPP	52446	0.538462
DHRS9	sterol and vitamin metabolic process	-1.28097	0.00554306	2.43362	0.000170083	5.09446	13941.2	0.0220604	0.196292	0.357143	8	11	3.00489e-12	false	false	false	10.625	8	0	0	0.701931	0.588977	false	0	MAT1A	496826	0.408333
HSD17B11	sterol and vitamin metabolic process	0.876235	0.00711779			6.60579	1105.17	0.00174557	0.151382	0.5	4	11	1.3205e-15	false	false	false	5.75	4	0	0	0.701861	4.67311	false	0	MARS	496826	0.42
CBR1	sterol and vitamin metabolic process	1.50746	0.00851175			7.07179	1592	0.00251889	0.141407	0.333333	3	13	1.93921e-16			false	3.33333	3	0	0	0.701931	2.21643	false	0	MAT2A	496826	0.408333
DHCR24	sterol and vitamin metabolic process	1.17357	0.0213063			6.6272	4183.02	0.0066193	0.150893	0.285714	7	13	1.06145e-14	false	false	false	3.42857	7	0	0	0.703191	5.49639	false	0	HS3ST6	0	0.666667
PMVK	sterol and vitamin metabolic process	0.920748	0.0240681			8.46977	11060	0.0150181	0.118067	0	2	13	4.89759e-20	false	false	false	2.5	2	0	0	0.741254	1.12125	false	0	YARS2	0	0.466667
MVK	sterol and vitamin metabolic process	1.01094	0.00297738			7.48615	12624	0.0174988	0.13358	0	2	12	5.64857e-18	false	false	false	2	2	0	0	0.674993	4.67311	false	0	GOT1L1	4	0.833333
MVD	sterol and vitamin metabolic process	1.03318	0.0605183	2.00416	0.00355361	9.45592	9508	0.0125436	0.105754	0	3	14	9.4039e-22	false	false	false	1.66667	3	0	0	0.789113	2.00849	false	0	GCAT	41736	0.303922
LSS	sterol and vitamin metabolic process	0.379257	0.0370167	2.29047	0.000496295	7.62594	0	0	0.131131	0	1	14	8.35828e-17	false	false	false	7	1	0	0	0.721103	0.0127642	false	0	AARS2	0	0.46875
HMGCS2	sterol and vitamin metabolic process	3.40242	0.000203739			5.52645	18403.9	0.0266671	0.180948	0.2	6	10	9.20955e-14	false	false	false	7.66667	6	0	0	0.640078	0.127113	false	0	UGT3A2	2	0.75
HMGCR	sterol and vitamin metabolic process	0.513833	0.0803333			6.50504	14184	0.0199733	0.153727	0	2	11	7.25432e-16	false	false	false	4	2	0	0	0.639938	0.439144	false	0	UXS1	2	1
SOAT2	sterol and vitamin metabolic process	-1.11874	0.0612108			5.66121	4346.75	0.00687843	0.176641	0.6	5	12	6.68459e-13	false	false	false	15	5	0	0	0.701931	5.49639	false	0	MAT2B	496826	0.408333
HPGD	sterol and vitamin metabolic process	1.32383	0.0514143			8.07053	0	0	0.123908	0	1	14	1.53046e-18			false	3	1	0	0	0.777008	0.0186193	false	0	ENTPD2	0	1
CYP46A1	sterol and vitamin metabolic process	0.247049	0.732667	2.29047	0.000496295	7.62469	0	0	0.131153	1	2	14	1.67128e-16			false	6	2	0	0	0.760985	0.758797	false	0	ENTPD6	0	0.712121
AUH	sterol and vitamin metabolic process	0.30837	0.0525468			6.52519	0	0	0.153252	0	1	11	7.25304e-16	false	false	false	6	1	0	0	0.633221	2.90641	false	0	ECH1	0	0
BHMT	sulfur amino acid metabolic process	2.38676	0.0138774			5.54534	11095.5	0.0175846	0.180332	0.111111	10	13	3.10471e-14	false	false	false	6.4	10	0	0	0.759866	8.18515	false	0	GLS2	63902	0.379487
BHMT2	sulfur amino acid metabolic process	2.10259	0.000704811			6.42443	840.142	0.00132788	0.155656	0.238095	7	15	2.34032e-14	false	false	false	5.71429	7	0	0	0.730339	2.65427	false	0	MCCC2	68264	0.411765
GCLM	sulfur amino acid metabolic process	0.513889	0.0408124			7.58942	0	0	0.131762	0	1	15	3.41503e-18	false	false	false	5	1	0	0	0.701861	4.67311	false	0	2002-03-01	496826	0.42
MRI1	sulfur amino acid metabolic process	-0.133743	0.28775	2.53097	7.1555e-05	6.27834	1592	0.00251889	0.159278	0	2	14	6.11377e-14			false	3	2	0	0	0.759096	3.72926	false	0	OAS3	9786	0.572368
APRT	sulfur amino acid metabolic process	-0.705436	0.015232	2.39036	0.000215953	4.4068	25679.1	0.0390795	0.226922	0.179487	13	12	9.82124e-10	false	false	false	13.2308	13	0	0	0.748251	1.99239	false	0	ALDH5A1	0	0
APIP	sulfur amino acid metabolic process	0.655037	0.0146987			7.27708	0	0	0.137418	0	1	15	4.81136e-16			false	2	1	0	0	0.801357	2.58506	false	0	PCYT2	385078	0.546053
CDO1	sulfur amino acid metabolic process	1.10932	0.000892144			7.58942	0	0	0.131762	0	1	15	3.41503e-18	false	false	false	5	1	0	0	0.741044	3.88931	false	0	FARSB	0	0.571429
MTAP	sulfur amino acid metabolic process	-0.275991	0.0561365	2.00416	0.00355361	5.28212	6566.54	0.0103252	0.189318	0.1	5	13	7.76386e-12	false	false	false	6.2	5	0	0	0.785964	1.26464	false	0	CROT	416776	0.279661
TYW1	sulfur amino acid metabolic process	-0.0458706	0.760353	2.71993	1.70341e-05	7.35642	3	4.76e-06	0.135936	0.4	5	15	4.01344e-17			false	5.6	5	0	0	0.7493	4.67311	false	0	B3GNT3	11720	0.568627
CARS	sulfur amino acid metabolic process	-0.516364	0.00169069			7.58942	0	0	0.131762	0	1	15	3.41503e-18	false	false	false	5	1	0	0	0.697313	4.67311	false	0	DPYSL5	0	0.75
PCYOX1	sulfur amino acid metabolic process	0.659883	0.0240098			6.59068	4818.4	0.00762401	0.151729	0	5	14	4.46253e-16	false	false	false	3	5	0	0	0.741044	0.36522	false	0	SOAT2	574820	0.428571
MTR	sulfur amino acid metabolic process	0.447833	0.0754166	2.53097	7.1555e-05	5.77582	5840.89	0.00925725	0.173136	0.180952	15	13	6.92053e-14	false	false	false	8.53333	15	0	0	0.780297	1.83047	false	0	ELOVL6	215488	0.276896
MAT1A	sulfur amino acid metabolic process	1.11421	0.0450877			6.36524	501.955	0.00079462	0.157103	0.6	6	14	9.88364e-16	false	false	false	8.16667	6	0	0	0.684159	3.5194	false	0	ZFYVE16	0	0
MARS	sulfur amino acid metabolic process	0.0846317	0.54457	2.43362	0.000170083	6.3665	501.955	0.00079462	0.157072	0.4	5	14	9.82356e-16			false	8.4	5	0	0	0.717744	4.67311	false	0	B4GALT5	3370	0.571429
MAT2A	sulfur amino acid metabolic process	-0.510349	0.00487948			6.36524	501.955	0.00079462	0.157103	0.6	6	14	9.88364e-16	false	false	false	8.16667	6	0	0	0.789113	2.26311	false	0	NAGS	41736	0.303922
MAT2B	sulfur amino acid metabolic process	0.381153	0.0388935	2.57677	5.52268e-05	6.36524	501.955	0.00079462	0.157103	0.6	6	14	9.88364e-16	false	false	false	8.16667	6	0	0	0.729919	2.32203	false	0	MCAT	0	0.7
2002-03-01	sulfur amino acid metabolic process	0.284754	0.114128	2.43362	0.000170083	6.3665	501.955	0.00079462	0.157072	0.4	5	14	9.82356e-16	false	false	false	8.4	5	0	0	0.739575	0.731625	false	0	YWHAG	0	0.977105
HS6ST1	sulfur metabolic process	0.858102	0.000536015			6.34383	0	0	0.157634	0	1	12	2.16523e-14	false	false	false	6	1	0	0	0.7055	1.92236	false	0	PIPOX	1152	0.555556
HS3ST3B1	sulfur metabolic process	1.36359	1.73754e-05	2.57677	5.52268e-05	6.34257	0	0	0.157665	1	2	12	2.1824e-14	false	false	false	4	2	0	0	0.607193	0.492871	false	0	HPGD	0	0
GNS	sulfur metabolic process	-0.318238	0.0280879			6.34257	0	0	0.157665	1	2	12	2.18241e-14	false	false	false	4	2	0	0	0.631962	3.88931	false	0	CYP46A1	0	0.857143
NDST2	sulfur metabolic process	0.607103	0.00548882	2.14731	0.0013683	5.34509	7936	0.0125563	0.187088	0.133333	6	11	2.74982e-12	false	false	false	5	6	0	0	0.721592	5.80042	false	0	ALOX12	0	0
SULF2	sulfur metabolic process	-0.943946	0.00680502	2.24975	0.000617604	6.34257	0	0	0.157665	1	2	12	2.18241e-14	false	false	false	4	2	0	0	0.68094	0.11649	false	0	HADHA	0	0
HS3ST6	sulfur metabolic process	-0.0512147	0.933179	2.57677	5.52268e-05	6.34257	0	0	0.157665	1	2	12	2.18241e-14	false	false	false	4	2	0	0	0.693045	0.476924	false	0	AUH	0	0
