# Supplementary material for: KLF10 integrates circadian timing and sugar signaling to coordinate hepatic metabolism
Source: eLife. 2021 Aug 17;10:e65574. doi: 10.7554/eLife.65574 (PMC8410083; doi:10.7554/eLife.65574)
Supplement: Figure 7—source data 3. [file elife-65574-fig7-data3.xlsx]

## Sheet: Fig7B
KLF10 binding sites
-50	1883	22.2757
-45	2071	14.9678
-40	2390	10.6776
-35	2601	9.87529
-30	2911	8.82808
-25	3136	8.19469
-20	3508	7.32202
-15	3793	6.72804
-10	5317	5.83003
+1/-5	7913	5.30079
	35523	100

## Sheet: Fig7E
ChIP
	Acacb	Acacb	Acss2	Acss2
ab	IgG	KLF10	IgG	KLF10
	0.004	0.017	0.0004	0.062
	0.003	0.025	0.001	0.04
	0.003	0.021	0.001	0.031
	0.008	0.018	0.000392788	0.053
				0.044
				0.025
mean	0.0045	0.02025	0.000698197	0.0425
sem	0.00119024	0.00179699	0.000174252	0.00559017
mean	0.0045	0.000698197
	0.02025	0.0425
sem	0.00119024	0.000174252
	0.00179699	0.00559017
	Acacb		Acss2
	y	g	y	g
	0.017	KLF10	0.062	KLF10
	0.025	KLF10	0.04	KLF10
	0.021	KLF10	0.031	KLF10
	0.018	KLF10	0.053	KLF10
	0.004	igG	0.044	KLF10
	0.003	igG	0.025	KLF10
	0.003	igG	0.0004	igG
	0.008	igG	0.001	igG
			0.001	igG
			0.000392788	igG
	Wilcoxon		Wilcoxon
	p-value = 0.02284		p-value = 0.01417

## Sheet: Fig6F
Acacb
ZT9					ZT15
WT	WT_api	hepKO	hepKO_api		WT	WT_api	hepKO	hepKO_api
1.29113	1.20499	1.51743	1.42932		1	1.22895	0.718262	2.86097
2.15561	1.6842	1.67502	4.3667		0.472635	1.23601	1.18787	3.14631
1.54049	2.26101	1.62953	1.42373		1.16898	1.57545	0.873699	3.37469
1.29685	2.389	0.728132			1.29044	1.13546	1.41342	2.53083
2.88353	3.42269	1.11061			0.977535	1.57357
					1.29706
1.83352	2.19238	1.33215	2.40658		1.03444	1.34989	1.04831	2.9782
0.306132	0.373511	0.180866	0.980059		0.125519	0.0934024	0.156046	0.182424
ZT9							ZT15
y	g	p-value: 0.385535				y	g	p-value: 0.012514
1.29113	WT					1	WT		WT_api	WT	hepKO_api
2.15561	WT					0.472635	WT	WT	0.143437
1.54049	WT					1.16898	WT	hepKO_api	0.042469	0.003432
1.29685	WT					1.29044	WT	hepKO	0.143437	0.947858	0.003432
2.88353	WT					0.977535	WT
1.20499	WT_api					1.29706	WT
1.6842	WT_api					1.22895	WT_api
2.26101	WT_api					1.23601	WT_api
2.389	WT_api					1.57545	WT_api
3.42269	WT_api					1.13546	WT_api
1.51743	hepKO					1.57357	WT_api
1.67502	hepKO					0.718262	hepKO
1.62953	hepKO					1.18787	hepKO
0.728132	hepKO					0.873699	hepKO
1.11061	hepKO					1.41342	hepKO
1.42932	hepKO_api					2.86097	hepKO_api
4.3667	hepKO_api					3.14631	hepKO_api
1.42373	hepKO_api					3.37469	hepKO_api
						2.53083	hepKO_api
Acss2
ZT9					ZT15
WT	WT_api	hepKO	hepKO_api		WT	WT_api	hepKO	hepKO_api
3.02	3.14164	2.37718	3.26633		1	2.06979	1.30674	2.70722
1.34077	2.03779	2.75722	5.07136		0.845817	1.40677	1.79607	2.35427
3.72461	1.54764	2.58276	1.86169		1.41568	1.00671	0.739155	1.96274
0.68988	3.70347	1.50103			1.74826	1.76515	1.52674	1.91044
1.51688	3.51941	0.328231			1.01123	1.68933	1.36206	2.36997
	1.8544				0.710671	1.72605	1.31686	2.43428
					0.892173		1.51942	2.805
2.05843	2.63406	1.90928	3.39979		1.08912	1.61063	1.36672	2.36342
0.56489	0.379862	0.450438	0.928952		0.137696	0.148381	0.122786	0.127622
ZT9							ZT15
y	g	p-value: 0.338949				y	g	p-value: 0.000652
3.02	WT					1	WT		WT_api	WT	hepKO_api
1.34077	WT					0.845817	WT	WT	0.015175
3.72461	WT					1.41568	WT	hepKO_api	0.006155	1e-05
0.68988	WT					1.74826	WT	hepKO	0.171028	0.171028	0.00016
1.51688	WT					1.01123	WT
3.14164	WT_api					0.710671	WT
2.03779	WT_api					0.892173	WT
1.54764	WT_api					2.06979	WT_api
3.70347	WT_api					1.40677	WT_api
3.51941	WT_api					1.00671	WT_api
1.8544	WT_api					1.76515	WT_api
2.37718	hepKO					1.68933	WT_api
2.75722	hepKO					1.72605	WT_api
2.58276	hepKO					1.30674	hepKO
1.50103	hepKO					1.79607	hepKO
0.328231	hepKO					0.739155	hepKO
3.26633	hepKO_api					1.52674	hepKO
5.07136	hepKO_api					1.36206	hepKO
1.86169	hepKO_api					1.31686	hepKO
						1.51942	hepKO
						2.70722	hepKO_api
						2.35427	hepKO_api
						1.96274	hepKO_api
						1.91044	hepKO_api
						2.36997	hepKO_api
						2.43428	hepKO_api
						2.805	hepKO_api

## Sheet: Fig7_sup1
KLF10 protein rhythm
Zeitgeber time	0	3	6	9	12	15	18	21
time serie 1	13.7451	8.51792	42.1276	22.8644	25.7914	9.437	24.2888	11.6175
time serie 2	5.24592	10.6877	48.4474	35.3207	23.7384	6.97432	20.937	11.5337
mean	9.49549	9.60282	45.2875	29.0926	24.7649	8.20566	22.6129	11.5756
SEM	4.24957	1.0849	3.15992	6.22812	1.02651	1.23134	1.67592	0.0419167
Cosinor
Formula: value ~ (a + b * cos(2 * pi * (ZT - c)/24))
Parameters:
Estimate Std. Error t value Pr(>|t|)
a 20.080 2.687 7.473 0.00000468 ***
b 11.210 3.800 2.950 0.0113 *
c 8.433 1.295 6.513 0.00001963 ***				phase: 8:26 (hh:mm)
---
Signif. codes: 0 '***' 0.001 '**' 0.01 '*' 0.05 '.' 0.1 ' ' 1
Residual standard error: 10.75 on 13 degrees of freedom
Number of iterations to convergence: 3
Achieved convergence tolerance: 0.00000003759
