# Supplementary material for: KLF10 integrates circadian timing and sugar signaling to coordinate hepatic metabolism
Source: eLife journal article supplement (doi:10.7554/elife.65574), 2021-08-17
Supplement: supp [file elife_poa_e65574_Figure_1_source_data_1.xlsx]

## Sheet: Fig1B_left
Tissue distribution
Genotype	Liver	Kidney	Heart	WAT	Spleen	Lung
WT	1	1	1	1	1	1
WT	1.29482	1.09429	0.952638	0.655197	1.14076	1.02101
WT	0.749004	1.34723	0.716978	0.283221	1.61328	0.90125
WT	0.972112
hepKO	0.613546	1.18099	0.784584	1.79005	1.26576	1.19748
hepKO	0.0239044	1.04972	1.27456	0.63728	1.38511	1.02101
hepKO	0.0517928	0.687771	1.02101	0.702222	1.12506	1.13288
hepKO	0.0278884		0.716978	1.18921		1.03526
hepKO	0.0318725
WT	1.00398	1.14718	0.889872	0.646139	1.25135	0.974088	mean
	0.112039	0.103666	0.0875216	0.206966	0.185473	0.0369202	sem
hepKO	0.149801	0.972827	0.949284	1.07969	1.25864	1.09666	mean
	0.116035	0.14748	0.126505	0.266898	0.0751545	0.0418017	sem
Genotype	Liver		Wilcoxon rank sum test
WT	1		data: Liver by Genotype
WT	1.29482		p-value = 0.01587
WT	0.749004
WT	0.972112
hepKO	0.613546
hepKO	0.0239044
hepKO	0.0517928
hepKO	0.0278884
hepKO	0.0318725
Genotype	Kidney		ns
WT	1
WT	1.09429
WT	1.34723
hepKO	1.18099
hepKO	1.04972
hepKO	0.687771
Genotype	Heart		ns
WT	1
WT	0.952638
WT	0.716978
hepKO	0.784584
hepKO	1.27456
hepKO	1.02101
hepKO	0.716978
Genotype	WAT		ns
WT	1
WT	0.655197
WT	0.283221
hepKO	1.79005
hepKO	0.63728
hepKO	0.702222
hepKO	1.18921
Genotype	Spleen		ns
WT	1
WT	1.14076
WT	1.61328
hepKO	1.26576
hepKO	1.38511
hepKO	1.12506
Genotype	Lung		ns
WT	1
WT	1.02101
WT	0.90125
hepKO	1.19748
hepKO	1.02101
hepKO	1.13288
hepKO	1.03526

## Sheet: Fig1B_right
Primary hepatocytes
Genotype	WT	hepKO
	1	0.0256285
	1.00758	0.0139754
	0.92396	0.00574403
	0.776065	0.0160972
mean	0.926902	0.0153613
sem	0.053707	0.00408624
genotype	klf10
WT	1		Wilcoxon rank sum test
WT	1.00758		data: klf10 by genotype
WT	0.92396		p-value = 0.02857
WT	0.776065
hepKO	0.0256285
hepKO	0.0139754
hepKO	0.00574403
hepKO	0.0160972

## Sheet: Fig1D
times serie comparing flox and hep
Zeitgeber time		0	3	6	9	12	15	18	21	24
	WT	1	2.88106	4.19887	7.88986	1.87644	3.09084	0.778625	1.40153
	WT	0.767639	3.82113	6.86852	10.2496	1.96537	0.882091	1.02101	0.470315
	WT	1.3566	0.789494	3.3473	6.45313	2.84199	1.06955	1.40464	0.744323
	hepKO	0.16355	0.218727	0.384485	0.243351	0.283811	0.541863	0.409518	0.376051
	hepKO	0.123896	0.23844	0.288371	0.550953	0.38665	0.392564	0.387697	0.468623
	hepKO	0.618138	0.476715	0.452503	0.299142	0.405002	0.333094	0.558256	0.647521
mean	WT	1.04141	2.49723	4.8049	8.19754	2.22793	1.68083	1.06809	0.872055	1.04141
sem	WT	0.171276	0.895954	1.06069	1.1067	0.308098	0.707081	0.182242	0.2763	0.171276
mean	hepKO	0.301861	0.311294	0.37512	0.364482	0.358487	0.422507	0.451824	0.497399	0.301861
sem	hepKO	0.158552	0.0829062	0.0476116	0.0946162	0.0377124	0.0620983	0.0535879	0.0796766	0.158552

## Sheet: FigS1A
body mass			food intake
	WT	hepKO		WT	hepKO
	31.28	34.04		4.3129	4.18605
	31.81	32.03		4.75687	4.4186
	28.64	32.03		3.14286	5
	28.64	29.3		3.81429	4.44681
	29.46	32.5		4.35714	2.51429
	32.86	34.56		3.14371	4.19162
	28.73	27.42			5.17964
	29.71	28.3			4.34132
	30	29.45
	30	32.81	mean	3.92129	4.28479
	30.43	31.46	sem	0.274685	0.283875
	31	32.17
	31.48	32.2
	30	29.9
	29	34.35
	29	30.12
	29	31.9
	31.3	31.74
	29.4	32.1
	27.3	27.63
	31.17	26.23
	26.67	26.49
	34.77	28.13
	36.47	33.62		fi	g
	34.69	32.98		4.3129	WT
	33.24	24.27		4.75687	WT
	32.22	23.89		3.14286	WT
	30.8	27.7		3.81429	WT
	31.5	29.2		4.35714	WT
	30.71	33.4		3.14371	WT
	33.41	30		4.18605	hepKO
	28.1	36		4.4186	hepKO
	25.7	39		5	hepKO
	31	32.33		4.44681	hepKO
	26.5	26.58		2.51429	hepKO
	31.7	31.33		4.19162	hepKO
	32.61	35.4		5.17964	hepKO
	38.26	30.9		4.34132	hepKO
	27.7	32.4		Wilcoxon rank sum test
	27.7	28.56		p-value = 0.3319
	27.7	29.55
	31.02	28.96
	28.55	28.96
	33.17	30.13
mean	30.5545	30.7277
sem	0.393407	0.465275
	bm	g
	31.28	WT
	31.81	WT
	28.64	WT
	28.64	WT
	29.46	WT
	32.86	WT
	28.73	WT
	29.71	WT
	30	WT
	30	WT
	30.43	WT
	31	WT
	31.48	WT
	30	WT
	29	WT
	29	WT
	29	WT
	31.3	WT
	29.4	WT
	27.3	WT
	31.17	WT
	26.67	WT
	34.77	WT
	36.47	WT
	34.69	WT
	33.24	WT
	32.22	WT
	30.8	WT
	31.5	WT
	30.71	WT
	33.41	WT
	28.1	WT
	25.7	WT
	31	WT
	26.5	WT
	31.7	WT
	32.61	WT
	38.26	WT
	27.7	WT
	27.7	WT
	27.7	WT
	31.02	WT
	28.55	WT
	33.17	WT
	34.04	hepKO
	32.03	hepKO
	32.03	hepKO
	29.3	hepKO
	32.5	hepKO
	34.56	hepKO
	27.42	hepKO
	28.3	hepKO
	29.45	hepKO
	32.81	hepKO
	31.46	hepKO
	32.17	hepKO
	32.2	hepKO
	29.9	hepKO
	34.35	hepKO
	30.12	hepKO
	31.9	hepKO
	31.74	hepKO
	32.1	hepKO
	27.63	hepKO
	26.23	hepKO
	26.49	hepKO
	28.13	hepKO
	33.62	hepKO
	32.98	hepKO
	24.27	hepKO
	23.89	hepKO
	27.7	hepKO
	29.2	hepKO
	33.4	hepKO
	30	hepKO
	36	hepKO
	39	hepKO
	32.33	hepKO
	26.58	hepKO
	31.33	hepKO
	35.4	hepKO
	30.9	hepKO
	32.4	hepKO
	28.56	hepKO
	29.55	hepKO
	28.96	hepKO
	28.96	hepKO
	30.13	hepKO
	Wilcoxon rank sum test
	p-value = 0.5789
