# Supplementary material for: KLF10 integrates circadian timing and sugar signaling to coordinate hepatic metabolism
Source: eLife. 2021 Aug 17;10:e65574. doi: 10.7554/eLife.65574 (PMC8410083; doi:10.7554/eLife.65574)
Supplement: Supplementary file 1. [file elife-65574-supp1.xlsx]

## Sheet: Primers
Primers used in the study
Name	Sequence	Use	Identifier
Cre-ABT290_forward	5'-ATCATTTCTTTGTTTTCAGG-3'	Genotyping	Schuler et al. 2004
Cre-ABT294_forward	5'-TTAAACAAGCAAAACCAAAT-3'	Genotyping	Schuler et al. 2004
Cre-ABV93_reverse	5'-GGAACCCAAACTGATGACCA-3'	Genotyping	Schuler et al. 2004
Flox_forward	5'-ACATTGTTAGTGATGTTTCAAGAACCGTGTC-3'	Genotyping	ENSMUSG00000037465
Flox_reverse	5'-GTTGCAAAAATTATGAAAAGCCTCATAAAGTG-3'	Genotyping	ENSMUSG00000037465
36B4_forward	5'-GCTGATGGGCAAGAACACCA-3'	qRT-PCR	ENSMUST00000086519.11
36B4_reverse	5'-CCCAAAGCCTGGAAGAAGGA-3'	qRT-PCR	ENSMUST00000086519.11
Acaca_forward	5'-CTTTCACATGAGATCCAGCAT-3'	qRT-PCR	ENSMUST00000020843.12
Acaca_reverse	5'-AACAAATCGGATTGCACGTT-3'	qRT-PCR	ENSMUST00000020843.12
Acacb_forward	5'-GCACACATCAAGAGACAGCTGAT-3'	qRT-PCR	ENSMUST00000031583.14
Acacb_reverse	5'-GACATGCTGGGCCTCATAGTAG-3'	qRT-PCR	ENSMUST00000031583.14
Acly_forward	5'-ATCAACCCCCTTGTGGTGA-3'	qRT-PCR	ENSMUST00000107389.7
Acly_reverse	5'-GCTTCAAGCTTGCTCCACTT-3'	qRT-PCR	ENSMUST00000107389.7
Acss2_forward	5'-TTACTGGAAAACCGCATGCC-3'	qRT-PCR	ENSMUST00000029135.15
Acss2_reverse	5'-TGTGATCTTGGTGGTCTCCC-3'	qRT-PCR	ENSMUST00000029135.15
Elovl6_forward	5'-GAGCAGAGGCGCAGAGAAC-3'	qRT-PCR	ENSMUST00000071402.6
Elovl6_forward	5'-ATGCCGACCACCAAAGATAA-3'	qRT-PCR	ENSMUST00000071402.6
Fasn_forward	5'-TCGACTTCAAAGGACCAAGC-3'	qRT-PCR	ENSMUST00000055655.8
Fasn_reverse	5'-TTCATGAACTGCACAGAGGTG-3'	qRT-PCR	ENSMUST00000055655.8
G6pc_forward	5'-CTCGTCTTCAAGTGGATTCTGT-3'	qRT-PCR	ENSMUST00000019469.2
G6pc_reverse	5'-TGGCTTTTTCTTTCCTCGAA-3'	qRT-PCR	ENSMUST00000019469.2
Gck_forward	5'-CCAGAAGGCTCAGAAGTTGG-3'	qRT-PCR	ENSMUST00000102920.3
Gck_reverse	5'-TGCTTGTCCAGGAAGTCAGA-3'	qRT-PCR	ENSMUST00000102920.3
Khk_forward	5'-GGCGTGGATGTGTCTCAAGT-3'	qRT-PCR	ENSMUST00000201621.3
Khk_reverse	5'-ACATCTGGCAGGTTCGTG-TC-3'	qRT-PCR	ENSMUST00000201621.3
Klf10_forward	5'-AGTGACTTTGAAGCGGTGGA-3'	qRT-PCR	ENSMUST00000074043.6
Klf10_reverse	5'-AAGGTGCGTTAAACAAAATGC-3'	qRT-PCR	ENSMUST00000074043.6
Me1_forward	5'-AGAGGATGTCGTCAAGGCTATT-3'	qRT-PCR	ENSMUST00000034989.14
Me1_reverse	5'-TGTTCCCACATCCAAAGTGA-3'	qRT-PCR	ENSMUST00000034989.14
Pck1_forward	5'-TTTGATGCCCAAGGCAACTT-3'	qRT-PCR	ENSMUST00000029017.5
Pck1_reverse	5'-ATCGATGCCTTCCCAGTAAA-3'	qRT-PCR	ENSMUST00000029017.5
Pklr_forward	5'-CGGAAAATTGGCCCAGA-3'	qRT-PCR	ENSMUST00000107482.9
Pklr_reverse	5'-CACCACATCACTGGCTTTTC-3'	qRT-PCR	ENSMUST00000107482.9
Slc2a2_forward	5'-GGACAAACTTGGAAGGATCA-3'	qRT-PCR	ENSMUST00000029240.13
Slc2a2_reverse	5'-CAGTCCTGAAATTAGCCCACA-3'	qRT-PCR	ENSMUST00000029240.13
Slc2a4_forward	5'-GCGCCTACTCAGGGCTAAC-3'	qRT-PCR	ENSMUST00000018710.12
Slc2a4_reverse	5'-GACAGAAGGGCAGCAGAATC-3'	qRT-PCR	ENSMUST00000018710.12
Slc2a5_forward	5'-TCCCTCAGAGTTCATGCAGC-3'	qRT-PCR	ENSMUST00000030826.3
Slc2a5_reverse	5'-TCCCTCAGAGTTCATGCAGC-3'	qRT-PCR	ENSMUST00000030826.3
Thrsp_forward	5'-GACCTAGAAGCCCAGTTCCA-3'	qRT-PCR	ENSMUST00000043077.7
Thrsp_reverse	5'-CTCGTGTAAAGCGATCTTCAG-3'	qRT-PCR	ENSMUST00000043077.7
Acacb_forward	5'-AAACACTGGCTGCTCCATTC-3'	ChIP	ENSMUSG00000042010
Acacb_reverse	5'-GACACAAGCACACCCACAAC-3'	ChIP	ENSMUSG00000042010
Acss2_forward	5'-TCAGAACAGGAGGAGGAGGA-3'	ChIP	ENSMUSG00000027605
Acss2_reverse	5'-CCACTGAGGGGCCGTAAG-3'	ChIP	ENSMUSG00000027605
